# Supplementary material for: Systematic identification and characterization of exon–intron circRNAs
Source: Genome Res. 2024 Mar;34(3):376–93. doi: 10.1101/gr.278590.123 (PMC11067877; doi:10.1101/gr.278590.123)
Supplement: Supplement 1 [file Supplemental_Table_S1.xlsx]

## Sheet: Table S1A. HEK293_circRNA
Supplemental Table S1A. circRNAs detected with CIRI2 from RNase R-treated RNA-seq in HEK293 cells
					#BSJ
chr	circRNA_start	circRNA_end	circRNA_ID	strand	HEK293_rep1	HEK293_rep2	HEK293_rep3	HEK293_rep4
Chr1	805799	810170	Chr1:805799|810170	-	2	3	27	17
Chr1	925922	931089	Chr1:925922|931089	+	4	0	7	2
Chr1	925922	939412	Chr1:925922|939412	+	4	11	5	2
Chr1	925922	943808	Chr1:925922|943808	+	1	11	6	3
Chr1	930155	931089	Chr1:930155|931089	+	2	14	2	3
Chr1	930155	935896	Chr1:930155|935896	+	4	4	0	0
Chr1	930155	939129	Chr1:930155|939129	+	2	4	3	0
Chr1	930155	939412	Chr1:930155|939412	+	37	10	19	8
Chr1	930155	939460	Chr1:930155|939460	+	11	6	2	1
Chr1	935772	939412	Chr1:935772|939412	+	845	843	450	346
Chr1	935772	939460	Chr1:935772|939460	+	161	190	64	44
Chr1	935772	941306	Chr1:935772|941306	+	16	19	4	2
Chr1	935805	939412	Chr1:935805|939412	+	2	4	0	6
Chr1	939040	939412	Chr1:939040|939412	+	1	0	0	0
Chr1	939040	939460	Chr1:939040|939460	+	6	0	1	0
Chr1	955923	957025	Chr1:955923|957025	-	1	9	3	0
Chr1	955923	957273	Chr1:955923|957273	-	29	50	20	19
Chr1	961629	962047	Chr1:961629|962047	+	1	5	3	0
Chr1	1008194	1009370	Chr1:1008194|1009370	+	6	0	0	2
Chr1	1022201	1035324	Chr1:1022201|1035324	+	2	0	0	1
Chr1	1051253	1051815	Chr1:1051253|1051815	+	2	6	0	0
Chr1	1051453	1051815	Chr1:1051453|1051815	+	6	0	0	0
Chr1	1223244	1223968	Chr1:1223244|1223968	-	73	109	462	231
Chr1	1223244	1228946	Chr1:1223244|1228946	-	19	20	4	15
Chr1	1255234	1257310	Chr1:1255234|1257310	-	4	12	0	2
Chr1	1256045	1257310	Chr1:1256045|1257310	-	6	2	4	13
Chr1	1256045	1263386	Chr1:1256045|1263386	-	12	13	7	8
Chr1	1256045	1266136	Chr1:1256045|1266136	-	2	0	0	0
Chr1	1256045	1267992	Chr1:1256045|1267992	-	37	45	21	31
Chr1	1256992	1257310	Chr1:1256992|1257310	-	30	27	53	91
Chr1	1256992	1263386	Chr1:1256992|1263386	-	32	5	14	28
Chr1	1256992	1267992	Chr1:1256992|1267992	-	66	39	46	42
Chr1	1256992	1268611	Chr1:1256992|1268611	-	3	12	0	0
Chr1	1262269	1263386	Chr1:1262269|1263386	-	4	0	0	4
Chr1	1263346	1267992	Chr1:1263346|1267992	-	5	0	8	7
Chr1	1263346	1268611	Chr1:1263346|1268611	-	3	0	0	0
Chr1	1267733	1268577	Chr1:1267733|1268577	-	3	0	0	0
Chr1	1267862	1268611	Chr1:1267862|1268611	-	4	0	3	0
Chr1	1319296	1321984	Chr1:1319296|1321984	-	2	0	0	0
Chr1	1337977	1338653	Chr1:1337977|1338653	-	3	0	0	0
Chr1	1337977	1341805	Chr1:1337977|1341805	-	2	0	0	0
Chr1	1337977	1342758	Chr1:1337977|1342758	-	9	0	3	7
Chr1	1387235	1390865	Chr1:1387235|1390865	-	9	32	22	27
Chr1	1387777	1390563	Chr1:1387777|1390563	-	1	0	0	0
Chr1	1450681	1460917	Chr1:1450681|1460917	+	2	0	0	0
Chr1	1482138	1518990	Chr1:1482138|1518990	+	11	0	0	0
Chr1	1485016	1487914	Chr1:1485016|1487914	+	7	2	2	0
Chr1	1485782	1490424	Chr1:1485782|1490424	+	1	0	0	0
Chr1	1489204	1490671	Chr1:1489204|1490671	+	6	9	11	6
Chr1	1489204	1529331	Chr1:1489204|1529331	+	6	2	7	6
Chr1	1561332	1564916	Chr1:1561332|1564916	-	9	30	14	10
Chr1	1564487	1564916	Chr1:1564487|1564916	-	6	4	7	2
Chr1	1564605	1564916	Chr1:1564605|1564916	-	5	14	9	8
Chr1	1637081	1703995	Chr1:1637081|1703995	-	7	0	4	1
Chr1	1652439	1657498	Chr1:1652439|1657498	-	1	0	0	0
Chr1	1655369	1657498	Chr1:1655369|1657498	-	5	2	15	5
Chr1	1655369	1722831	Chr1:1655369|1722831	-	5	2	5	5
Chr1	1668327	1670151	Chr1:1668327|1670151	-	3	10	0	0
Chr1	1668327	1676846	Chr1:1668327|1676846	-	4	17	0	2
Chr1	1668327	1739704	Chr1:1668327|1739704	-	40	43	22	13
Chr1	1669664	1670151	Chr1:1669664|1670151	-	3	7	4	4
Chr1	1676064	1739704	Chr1:1676064|1739704	-	1	0	0	0
Chr1	1734690	1739704	Chr1:1734690|1739704	-	25	32	17	10
Chr1	1738922	1739704	Chr1:1738922|1739704	-	1	0	0	0
Chr1	1756503	1771327	Chr1:1756503|1771327	-	1	0	0	0
Chr1	1761891	1765446	Chr1:1761891|1765446	-	1	5	0	0
Chr1	1761952	1765446	Chr1:1761952|1765446	-	8	4	3	2
Chr1	1789053	1790596	Chr1:1789053|1790596	-	1	2	1	1
Chr1	1789053	1839238	Chr1:1789053|1839238	-	3	0	0	0
Chr1	1793245	1817875	Chr1:1793245|1817875	-	9	6	0	0
Chr1	1793245	1839238	Chr1:1793245|1839238	-	3	0	0	2
Chr1	1804419	1815862	Chr1:1804419|1815862	-	4	5	2	8
Chr1	1804419	1817875	Chr1:1804419|1817875	-	81	40	37	54
Chr1	1804419	1825499	Chr1:1804419|1825499	-	23	34	13	5
Chr1	1804419	1839238	Chr1:1804419|1839238	-	18	44	28	8
Chr1	1806475	1825499	Chr1:1806475|1825499	-	5	0	14	1
Chr1	1806475	1839238	Chr1:1806475|1839238	-	12	5	17	19
Chr1	1815756	1839238	Chr1:1815756|1839238	-	44	75	182	63
Chr1	1815756	1839682	Chr1:1815756|1839682	-	1	0	0	0
Chr1	1815756	1874118	Chr1:1815756|1874118	-	2	0	0	0
Chr1	1815756	1879902	Chr1:1815756|1879902	-	1	0	5	1
Chr1	1825397	1839238	Chr1:1825397|1839238	-	8	5	4	3
Chr1	1839190	1853297	Chr1:1839190|1853297	-	3	7	3	2
Chr1	1839190	1879902	Chr1:1839190|1879902	-	4	2	6	6
Chr1	1853152	1879902	Chr1:1853152|1879902	-	2	0	0	0
Chr1	2055441	2059591	Chr1:2055441|2059591	+	25	0	12	9
Chr1	2055441	2150978	Chr1:2055441|2150978	+	1	1	0	0
Chr1	2135262	2150978	Chr1:2135262|2150978	+	18	26	18	12
Chr1	2135262	2156092	Chr1:2135262|2156092	+	2	24	2	3
Chr1	2144210	2148924	Chr1:2144210|2148924	+	1	0	0	1
Chr1	2144210	2150978	Chr1:2144210|2150978	+	3	0	1	3
Chr1	2146027	2150978	Chr1:2146027|2150978	+	3	0	3	1
Chr1	2150790	2156092	Chr1:2150790|2156092	+	9	6	6	1
Chr1	2169518	2174016	Chr1:2169518|2174016	+	7	0	2	0
Chr1	2169518	2175313	Chr1:2169518|2175313	+	12	7	3	2
Chr1	2259829	2260131	Chr1:2259829|2260131	+	1	0	0	0
Chr1	2302978	2304585	Chr1:2302978|2304585	+	3	0	5	3
Chr1	2393232	2403589	Chr1:2393232|2403589	+	1	0	0	0
Chr1	2393270	2400935	Chr1:2393270|2400935	+	9	0	0	0
Chr1	2393270	2403589	Chr1:2393270|2403589	+	1	2	2	2
Chr1	2395784	2399514	Chr1:2395784|2399514	+	2	2	1	0
Chr1	2395784	2400935	Chr1:2395784|2400935	+	33	31	16	17
Chr1	2395784	2402342	Chr1:2395784|2402342	+	6	4	2	2
Chr1	2395784	2403589	Chr1:2395784|2403589	+	15	15	10	24
Chr1	2397116	2402342	Chr1:2397116|2402342	+	1	0	0	0
Chr1	2399488	2403081	Chr1:2399488|2403081	+	3	0	0	0
Chr1	2400857	2403589	Chr1:2400857|2403589	+	4	0	0	0
Chr1	2434315	2436856	Chr1:2434315|2436856	-	1	0	0	0
Chr1	2509862	2515717	Chr1:2509862|2515717	-	2	0	0	0
Chr1	2556585	2560714	Chr1:2556585|2560714	+	3	0	0	0
Chr1	2562865	2563416	Chr1:2562865|2563416	+	5	0	0	0
Chr1	3186125	3186474	Chr1:3186125|3186474	+	11	18	45	12
Chr1	3579825	3595447	Chr1:3579825|3595447	-	4	0	0	0
Chr1	3579825	3602600	Chr1:3579825|3602600	-	15	6	0	5
Chr1	3722021	3723469	Chr1:3722021|3723469	+	3	6	0	6
Chr1	3738223	3746186	Chr1:3738223|3746186	-	1	8	1	5
Chr1	3740233	3743190	Chr1:3740233|3743190	-	1	0	0	1
Chr1	3740233	3746181	Chr1:3740233|3746181	-	1	1	0	1
Chr1	3740233	3746186	Chr1:3740233|3746186	-	12	40	11	4
Chr1	3781151	3781601	Chr1:3781151|3781601	-	1	0	5	1
Chr1	3781512	3785203	Chr1:3781512|3785203	-	7	3	9	0
Chr1	3781512	3787310	Chr1:3781512|3787310	-	7	13	6	0
Chr1	3782661	3784111	Chr1:3782661|3784111	-	2	0	1	0
Chr1	3782703	3787048	Chr1:3782703|3787048	-	7	0	0	0
Chr1	3844907	3848781	Chr1:3844907|3848781	-	1	0	0	0
Chr1	3867974	3872572	Chr1:3867974|3872572	+	8	1	0	7
Chr1	5873252	5880239	Chr1:5873252|5880239	-	14	34	12	20
Chr1	5904617	5905780	Chr1:5904617|5905780	-	10	0	2	1
Chr1	5904617	5909213	Chr1:5904617|5909213	-	4	0	0	0
Chr1	5904617	5933329	Chr1:5904617|5933329	-	4	9	9	0
Chr1	5904617	5961949	Chr1:5904617|5961949	-	2	0	0	0
Chr1	5904617	5969259	Chr1:5904617|5969259	-	3	0	0	1
Chr1	5904617	5986327	Chr1:5904617|5986327	-	5	5	4	1
Chr1	5922060	5952836	Chr1:5922060|5952836	-	2	0	0	0
Chr1	5922060	5961949	Chr1:5922060|5961949	-	1	0	0	0
Chr1	5927649	5933329	Chr1:5927649|5933329	-	80	42	64	52
Chr1	5927649	5948251	Chr1:5927649|5948251	-	9	8	4	0
Chr1	5927649	5952836	Chr1:5927649|5952836	-	64	54	10	27
Chr1	5927649	5961949	Chr1:5927649|5961949	-	2	0	2	0
Chr1	5927649	5986327	Chr1:5927649|5986327	-	3	12	8	0
Chr1	5947104	5952836	Chr1:5947104|5952836	-	73	48	23	37
Chr1	5947104	5961949	Chr1:5947104|5961949	-	13	13	18	10
Chr1	5947104	5986327	Chr1:5947104|5986327	-	4	20	9	11
Chr1	5947141	5986232	Chr1:5947141|5986232	-	3	0	0	0
Chr1	5952700	5969259	Chr1:5952700|5969259	-	6	6	3	1
Chr1	5952700	5978413	Chr1:5952700|5978413	-	1	0	0	0
Chr1	5961760	5986232	Chr1:5961760|5986232	-	2	0	0	0
Chr1	5961794	5969259	Chr1:5961794|5969259	-	8	16	10	8
Chr1	5961794	5986232	Chr1:5961794|5986232	-	2	0	0	2
Chr1	5961794	5986327	Chr1:5961794|5986327	-	8	48	17	10
Chr1	5967299	5978413	Chr1:5967299|5978413	-	2	0	0	1
Chr1	5967299	5986232	Chr1:5967299|5986232	-	2	0	2	3
Chr1	5967299	5986327	Chr1:5967299|5986327	-	14	25	22	10
Chr1	5969087	5986327	Chr1:5969087|5986327	-	4	4	1	1
Chr1	5978270	5986327	Chr1:5978270|5986327	-	6	5	17	12
Chr1	6224762	6232119	Chr1:6224762|6232119	-	2	0	0	0
Chr1	6231902	6233643	Chr1:6231902|6233643	-	96	53	65	44
Chr1	6281102	6294980	Chr1:6281102|6294980	-	9	18	22	18
Chr1	6281102	6318578	Chr1:6281102|6318578	-	4	0	0	0
Chr1	6318492	6333568	Chr1:6318492|6333568	-	3	0	2	1
Chr1	6318492	6339589	Chr1:6318492|6339589	-	1	0	0	0
Chr1	6318492	6349866	Chr1:6318492|6349866	-	2	0	3	1
Chr1	6525757	6526829	Chr1:6525757|6526829	-	1	0	1	0
Chr1	6525757	6550615	Chr1:6525757|6550615	-	2	0	0	0
Chr1	6526696	6532079	Chr1:6526696|6532079	-	15	8	6	5
Chr1	6528994	6532079	Chr1:6528994|6532079	-	2	7	2	1
Chr1	6528994	6533441	Chr1:6528994|6533441	-	3	0	0	3
Chr1	6531968	6532760	Chr1:6531968|6532760	-	2	11	0	0
Chr1	6531968	6533441	Chr1:6531968|6533441	-	3	9	3	4
Chr1	6531968	6545180	Chr1:6531968|6545180	-	1	0	0	5
Chr1	6533280	6549698	Chr1:6533280|6549698	-	9	2	4	7
Chr1	6549571	6550615	Chr1:6549571|6550615	-	9	5	3	5
Chr1	6592690	6593026	Chr1:6592690|6593026	+	3	0	0	0
Chr1	6595485	6599452	Chr1:6595485|6599452	-	7	10	0	2
Chr1	6599047	6599452	Chr1:6599047|6599452	-	27	40	15	18
Chr1	6616757	6620337	Chr1:6616757|6620337	+	33	17	18	6
Chr1	6619803	6620337	Chr1:6619803|6620337	+	23	22	7	8
Chr1	6628499	6634193	Chr1:6628499|6634193	+	2	0	0	0
Chr1	6644558	6645978	Chr1:6644558|6645978	-	5	0	2	1
Chr1	6651529	6654039	Chr1:6651529|6654039	-	3	0	0	1
Chr1	6667709	6681037	Chr1:6667709|6681037	-	33	30	44	34
Chr1	6796739	6825210	Chr1:6796739|6825210	+	1	0	0	0
Chr1	6796815	6825210	Chr1:6796815|6825210	+	3	1	0	0
Chr1	6806983	6825210	Chr1:6806983|6825210	+	12	27	43	29
Chr1	6806983	6853189	Chr1:6806983|6853189	+	4	2	0	5
Chr1	6806983	6888899	Chr1:6806983|6888899	+	9	1	0	6
Chr1	6820181	6828434	Chr1:6820181|6828434	+	3	4	0	0
Chr1	6820181	6888899	Chr1:6820181|6888899	+	11	19	22	18
Chr1	6871757	6874423	Chr1:6871757|6874423	+	1	1	0	6
Chr1	6871757	6888899	Chr1:6871757|6888899	+	2	2	4	3
Chr1	6871757	6899019	Chr1:6871757|6899019	+	7	0	0	0
Chr1	7777160	7778169	Chr1:7777160|7778169	+	1	0	9	0
Chr1	7835762	7837149	Chr1:7835762|7837149	+	3	0	0	1
Chr1	7933272	7938739	Chr1:7933272|7938739	+	7	0	0	0
Chr1	7962763	7977738	Chr1:7962763|7977738	+	9	0	2	1
Chr1	7985922	7993274	Chr1:7985922|7993274	+	4	0	0	0
Chr1	7996321	8000728	Chr1:7996321|8000728	+	1	0	1	0
Chr1	8358551	8423247	Chr1:8358551|8423247	-	6	0	0	0
Chr1	8364056	8422807	Chr1:8364056|8422807	-	6	0	0	0
Chr1	8422727	8466023	Chr1:8422727|8466023	-	2	0	0	0
Chr1	8465925	8508675	Chr1:8465925|8508675	-	14	2	8	2
Chr1	8465925	8541318	Chr1:8465925|8541318	-	14	0	9	6
Chr1	8465925	8551356	Chr1:8465925|8551356	-	1	0	0	0
Chr1	8465925	8557523	Chr1:8465925|8557523	-	7	4	1	3
Chr1	8465925	8614686	Chr1:8465925|8614686	-	8	15	1	8
Chr1	8465925	8624380	Chr1:8465925|8624380	-	3	4	0	0
Chr1	8465925	8656441	Chr1:8465925|8656441	-	1	0	0	0
Chr1	8495063	8508675	Chr1:8495063|8508675	-	4	11	3	16
Chr1	8495063	8541318	Chr1:8495063|8541318	-	53	48	23	28
Chr1	8495063	8551356	Chr1:8495063|8551356	-	1	0	0	0
Chr1	8495063	8557523	Chr1:8495063|8557523	-	60	37	34	27
Chr1	8495063	8614686	Chr1:8495063|8614686	-	75	60	24	18
Chr1	8495063	8624380	Chr1:8495063|8624380	-	1	0	0	0
Chr1	8495864	8496147	Chr1:8495864|8496147	-	3	0	0	0
Chr1	8508627	8557523	Chr1:8508627|8557523	-	48	17	20	20
Chr1	8508627	8614686	Chr1:8508627|8614686	-	5	16	11	8
Chr1	8523053	8557523	Chr1:8523053|8557523	-	6	1	0	0
Chr1	8541214	8557523	Chr1:8541214|8557523	-	71	47	90	98
Chr1	8541214	8557537	Chr1:8541214|8557537	-	3	0	0	0
Chr1	8541214	8566289	Chr1:8541214|8566289	-	1	0	0	0
Chr1	8541214	8614686	Chr1:8541214|8614686	-	185	183	84	121
Chr1	8541214	8616579	Chr1:8541214|8616579	-	2	4	0	0
Chr1	8541214	8624380	Chr1:8541214|8624380	-	4	17	5	4
Chr1	8556475	8614686	Chr1:8556475|8614686	-	26	16	20	29
Chr1	8612046	8624380	Chr1:8612046|8624380	-	2	0	3	0
Chr1	8614561	8624380	Chr1:8614561|8624380	-	5	7	9	9
Chr1	8614561	8656441	Chr1:8614561|8656441	-	18	7	10	8
Chr1	8614561	8792588	Chr1:8614561|8792588	-	1	0	2	0
Chr1	8655973	8656441	Chr1:8655973|8656441	-	8	11	67	23
Chr1	8792404	8806824	Chr1:8792404|8806824	-	4	2	0	2
Chr1	8861214	8863922	Chr1:8861214|8863922	+	1	0	0	0
Chr1	8861364	8864092	Chr1:8861364|8864092	-	1	0	0	0
Chr1	8863250	8865375	Chr1:8863250|8865375	+	4	0	0	0
Chr1	8865285	8874917	Chr1:8865285|8874917	-	1	0	0	0
Chr1	8866279	8867250	Chr1:8866279|8867250	-	15	24	23	4
Chr1	8866279	8868057	Chr1:8866279|8868057	-	2	6	5	2
Chr1	8866853	8867047	Chr1:8866853|8867047	+	1	0	0	0
Chr1	9237131	9247083	Chr1:9237131|9247083	+	2	0	0	0
Chr1	9244933	9247083	Chr1:9244933|9247083	+	2	0	2	2
Chr1	9553626	9573412	Chr1:9553626|9573412	+	1	2	0	0
Chr1	9553626	9580234	Chr1:9553626|9580234	+	3	0	0	0
Chr1	9595890	9602272	Chr1:9595890|9602272	+	8	12	0	2
Chr1	9740658	9741256	Chr1:9740658|9741256	-	4	6	3	15
Chr1	9749461	9755309	Chr1:9749461|9755309	-	7	0	5	0
Chr1	9751473	9755309	Chr1:9751473|9755309	-	3	0	0	1
Chr1	9871187	9877989	Chr1:9871187|9877989	-	5	13	38	7
Chr1	9920761	9930209	Chr1:9920761|9930209	+	5	0	0	0
Chr1	9931891	9934860	Chr1:9931891|9934860	-	21	22	83	81
Chr1	9931891	9935627	Chr1:9931891|9935627	-	28	33	22	47
Chr1	9931891	9936627	Chr1:9931891|9936627	-	5	0	0	1
Chr1	9972018	9975775	Chr1:9972018|9975775	+	3	0	6	3
Chr1	9972018	9981170	Chr1:9972018|9981170	+	25	31	34	21
Chr1	9972018	9982578	Chr1:9972018|9982578	+	1	0	0	0
Chr1	10095461	10105744	Chr1:10095461|10105744	+	31	65	22	34
Chr1	10101108	10119613	Chr1:10101108|10119613	+	2	0	2	3
Chr1	10102948	10117600	Chr1:10102948|10117600	+	1	0	0	0
Chr1	10117459	10119613	Chr1:10117459|10119613	+	1	0	0	0
Chr1	10117459	10130813	Chr1:10117459|10130813	+	5	3	1	0
Chr1	10121962	10135186	Chr1:10121962|10135186	+	1	0	1	0
Chr1	10134988	10137205	Chr1:10134988|10137205	+	4	2	7	1
Chr1	10144940	10151561	Chr1:10144940|10151561	+	1	3	0	1
Chr1	10149184	10151561	Chr1:10149184|10151561	+	3	2	0	1
Chr1	10149184	10161286	Chr1:10149184|10161286	+	2	17	1	10
Chr1	10232250	10261970	Chr1:10232250|10261970	+	1	1	0	0
Chr1	10232250	10268263	Chr1:10232250|10268263	+	1	5	0	1
Chr1	10256247	10261970	Chr1:10256247|10261970	+	5	6	0	7
Chr1	10261905	10268263	Chr1:10261905|10268263	+	11	7	1	6
Chr1	10261905	10291161	Chr1:10261905|10291161	+	7	0	0	0
Chr1	10267380	10268263	Chr1:10267380|10268263	+	2	6	14	5
Chr1	10267380	10272306	Chr1:10267380|10272306	+	11	10	2	0
Chr1	10267380	10291161	Chr1:10267380|10291161	+	4	0	0	2
Chr1	10271502	10276399	Chr1:10271502|10276399	+	1	0	6	6
Chr1	10271502	10278128	Chr1:10271502|10278128	+	4	5	10	4
Chr1	10291082	10297246	Chr1:10291082|10297246	+	2	0	4	3
Chr1	10291082	10324895	Chr1:10291082|10324895	+	1	0	0	1
Chr1	10292047	10297246	Chr1:10292047|10297246	+	2	2	2	1
Chr1	10320043	10324895	Chr1:10320043|10324895	+	1	5	2	1
Chr1	10320043	10343287	Chr1:10320043|10343287	+	2	2	0	0
Chr1	10334520	10345953	Chr1:10334520|10345953	+	1	0	0	1
Chr1	10334520	10348733	Chr1:10334520|10348733	+	2	0	0	0
Chr1	10336657	10365648	Chr1:10336657|10365648	+	1	0	0	0
Chr1	10342050	10365648	Chr1:10342050|10365648	+	1	0	0	0
Chr1	10345845	10348733	Chr1:10345845|10348733	+	1	0	4	0
Chr1	10352631	10365648	Chr1:10352631|10365648	+	3	0	0	0
Chr1	10360929	10365648	Chr1:10360929|10365648	+	9	0	0	0
Chr1	10363283	10365648	Chr1:10363283|10365648	+	4	8	4	4
Chr1	10365100	10365648	Chr1:10365100|10365648	+	6	0	6	0
Chr1	10408071	10419539	Chr1:10408071|10419539	+	1	0	0	0
Chr1	10411418	10413251	Chr1:10411418|10413251	+	15	4	7	13
Chr1	10431153	10440413	Chr1:10431153|10440413	+	3	0	0	0
Chr1	10433842	10442441	Chr1:10433842|10442441	+	17	24	26	13
Chr1	10440347	10442441	Chr1:10440347|10442441	+	4	13	8	16
Chr1	10461443	10463620	Chr1:10461443|10463620	-	4	0	0	0
Chr1	10467190	10469338	Chr1:10467190|10469338	-	1	8	10	19
Chr1	10760701	10761105	Chr1:10760701|10761105	-	3	0	5	2
Chr1	11001831	11003709	Chr1:11001831|11003709	-	3	0	0	0
Chr1	11016844	11020599	Chr1:11016844|11020599	+	13	2	0	1
Chr1	11018733	11020599	Chr1:11018733|11020599	+	9	1	1	3
Chr1	11022124	11025665	Chr1:11022124|11025665	+	4	0	0	0
Chr1	11055781	11058892	Chr1:11055781|11058892	-	3	0	0	0
Chr1	11070900	11076948	Chr1:11070900|11076948	-	38	55	23	47
Chr1	11073934	11074326	Chr1:11073934|11074326	-	1	1	0	4
Chr1	11073934	11076948	Chr1:11073934|11076948	-	3	2	10	16
Chr1	11090554	11091597	Chr1:11090554|11091597	-	9	0	9	8
Chr1	11112852	11133197	Chr1:11112852|11133197	-	2	0	0	0
Chr1	11121095	11122126	Chr1:11121095|11122126	-	5	0	1	1
Chr1	11121246	11122126	Chr1:11121246|11122126	-	2	2	6	7
Chr1	11124498	11133197	Chr1:11124498|11133197	-	3	5	0	6
Chr1	11134351	11139658	Chr1:11134351|11139658	-	2	0	0	0
Chr1	11139304	11146791	Chr1:11139304|11146791	-	1	0	2	0
Chr1	11144648	11146791	Chr1:11144648|11146791	-	2	0	4	2
Chr1	11146676	11167517	Chr1:11146676|11167517	-	2	2	0	2
Chr1	11146676	11212908	Chr1:11146676|11212908	-	3	0	0	0
Chr1	11199258	11199703	Chr1:11199258|11199703	-	2	0	2	6
Chr1	11199258	11204703	Chr1:11199258|11204703	-	1	0	0	0
Chr1	11204561	11243300	Chr1:11204561|11243300	-	2	0	0	0
Chr1	11228668	11232528	Chr1:11228668|11232528	-	2	0	0	0
Chr1	11240303	11243300	Chr1:11240303|11243300	-	1	0	1	4
Chr1	11241553	11248094	Chr1:11241553|11248094	-	4	3	0	0
Chr1	11668656	11668944	Chr1:11668656|11668944	+	3	0	0	0
Chr1	11800212	11801399	Chr1:11800212|11801399	-	4	0	11	0
Chr1	11823707	11827221	Chr1:11823707|11827221	+	15	14	0	5
Chr1	11824486	11828219	Chr1:11824486|11828219	+	1	0	0	0
Chr1	11828458	11829322	Chr1:11828458|11829322	+	1	0	0	0
Chr1	11942685	11948067	Chr1:11942685|11948067	+	6	7	0	3
Chr1	11947976	11949906	Chr1:11947976|11949906	+	2	0	0	0
Chr1	11947976	11950520	Chr1:11947976|11950520	+	5	14	0	1
Chr1	11950357	11952735	Chr1:11950357|11952735	+	1	0	0	0
Chr1	11970670	11972997	Chr1:11970670|11972997	+	2	0	0	0
Chr1	12001401	12002272	Chr1:12001401|12002272	+	6	0	0	0
Chr1	12275825	12278038	Chr1:12275825|12278038	+	2	13	0	9
Chr1	12288223	12293704	Chr1:12288223|12293704	+	3	0	2	0
Chr1	12288223	12293794	Chr1:12288223|12293794	+	1	0	0	0
Chr1	12290998	12308641	Chr1:12290998|12308641	+	2	1	1	1
Chr1	12293524	12304728	Chr1:12293524|12304728	+	2	0	0	2
Chr1	12293524	12308641	Chr1:12293524|12308641	+	5	0	4	0
Chr1	12299202	12304728	Chr1:12299202|12304728	+	22	5	16	9
Chr1	12299202	12308641	Chr1:12299202|12308641	+	86	44	36	48
Chr1	12299202	12311925	Chr1:12299202|12311925	+	7	16	5	5
Chr1	12299202	12321964	Chr1:12299202|12321964	+	2	4	2	4
Chr1	12299202	12322746	Chr1:12299202|12322746	+	9	0	0	2
Chr1	12299202	12333366	Chr1:12299202|12333366	+	3	0	0	3
Chr1	12318072	12321964	Chr1:12318072|12321964	+	6	0	2	2
Chr1	12319497	12323780	Chr1:12319497|12323780	+	2	0	0	0
Chr1	12321809	12329918	Chr1:12321809|12329918	+	2	0	0	0
Chr1	12321809	12333366	Chr1:12321809|12333366	+	2	0	0	0
Chr1	12327648	12329918	Chr1:12327648|12329918	+	3	0	1	0
Chr1	12362720	12363247	Chr1:12362720|12363247	+	3	0	0	2
Chr1	12368468	12416827	Chr1:12368468|12416827	+	3	0	0	0
Chr1	12400181	12403973	Chr1:12400181|12403973	+	2	0	4	0
Chr1	12400181	12416827	Chr1:12400181|12416827	+	1	15	7	4
Chr1	12415087	12416827	Chr1:12415087|12416827	+	1	0	1	1
Chr1	12450582	12497631	Chr1:12450582|12497631	+	5	0	0	0
Chr1	12455998	12460396	Chr1:12455998|12460396	+	10	3	10	4
Chr1	12455998	12497631	Chr1:12455998|12497631	+	2	1	4	5
Chr1	12578718	12579412	Chr1:12578718|12579412	-	29	13	22	11
Chr1	12578718	12580666	Chr1:12578718|12580666	-	16	15	0	4
Chr1	13595631	13610516	Chr1:13595631|13610516	+	3	0	0	0
Chr1	13715541	13742157	Chr1:13715541|13742157	+	29	28	30	12
Chr1	13715541	13749487	Chr1:13715541|13749487	+	8	19	22	7
Chr1	13731000	13742157	Chr1:13731000|13742157	+	30	40	58	50
Chr1	13731000	13744592	Chr1:13731000|13744592	+	2	2	0	0
Chr1	13773078	13782831	Chr1:13773078|13782831	+	1	0	0	2
Chr1	13808788	13809175	Chr1:13808788|13809175	-	2	0	0	0
Chr1	14726383	14759754	Chr1:14726383|14759754	+	1	0	0	0
Chr1	14759555	14760081	Chr1:14759555|14760081	+	1	0	0	0
Chr1	14759555	14762125	Chr1:14759555|14762125	+	12	0	1	0
Chr1	14780886	14960875	Chr1:14780886|14960875	+	4	8	0	3
Chr1	15034749	15044159	Chr1:15034749|15044159	+	10	8	7	7
Chr1	15056091	15063622	Chr1:15056091|15063622	+	1	0	0	0
Chr1	15367463	15374631	Chr1:15367463|15374631	+	1	0	0	0
Chr1	15442447	15443555	Chr1:15442447|15443555	+	4	0	0	0
Chr1	15493892	15495452	Chr1:15493892|15495452	-	2	0	0	0
Chr1	15495273	15507907	Chr1:15495273|15507907	-	1	0	0	0
Chr1	15504611	15507907	Chr1:15504611|15507907	-	1	5	0	0
Chr1	15518110	15518395	Chr1:15518110|15518395	-	1	13	11	10
Chr1	15534237	15536814	Chr1:15534237|15536814	+	16	46	14	20
Chr1	15567099	15568235	Chr1:15567099|15568235	+	3	0	3	0
Chr1	15626669	15643650	Chr1:15626669|15643650	+	3	8	8	1
Chr1	15630325	15646984	Chr1:15630325|15646984	+	2	0	0	0
Chr1	15630325	15651895	Chr1:15630325|15651895	+	2	4	0	4
Chr1	15633439	15643650	Chr1:15633439|15643650	+	1	0	0	2
Chr1	15633439	15651895	Chr1:15633439|15651895	+	2	5	0	0
Chr1	15638307	15646984	Chr1:15638307|15646984	+	17	6	3	0
Chr1	15638307	15649823	Chr1:15638307|15649823	+	4	12	0	0
Chr1	15643522	15649823	Chr1:15643522|15649823	+	4	1	3	0
Chr1	15643522	15651895	Chr1:15643522|15651895	+	6	2	1	1
Chr1	15649720	15651895	Chr1:15649720|15651895	+	14	2	14	8
Chr1	15694257	15695606	Chr1:15694257|15695606	+	4	0	0	0
Chr1	15717893	15721388	Chr1:15717893|15721388	+	25	21	25	30
Chr1	15764493	15765233	Chr1:15764493|15765233	+	2	4	2	0
Chr1	15764496	15765233	Chr1:15764496|15765233	+	3	0	1	0
Chr1	15768528	15774796	Chr1:15768528|15774796	+	2	0	0	5
Chr1	15786482	15796943	Chr1:15786482|15796943	-	3	0	1	0
Chr1	15790106	15793055	Chr1:15790106|15793055	-	8	0	0	0
Chr1	15790106	15796943	Chr1:15790106|15796943	-	2	4	6	4
Chr1	15792837	15796943	Chr1:15792837|15796943	-	22	20	31	26
Chr1	15807278	15807595	Chr1:15807278|15807595	-	5	0	0	0
Chr1	15867879	15876678	Chr1:15867879|15876678	+	10	41	32	35
Chr1	15872816	15873136	Chr1:15872816|15873136	+	1	0	12	5
Chr1	15872816	15876678	Chr1:15872816|15876678	+	75	356	339	330
Chr1	15872816	15909481	Chr1:15872816|15909481	+	4	13	9	8
Chr1	15872816	15916279	Chr1:15872816|15916279	+	2	0	7	9
Chr1	15872816	15919051	Chr1:15872816|15919051	+	3	4	0	0
Chr1	15876202	15876678	Chr1:15876202|15876678	+	3	0	3	4
Chr1	15909321	15911301	Chr1:15909321|15911301	+	7	3	17	9
Chr1	15909321	15916279	Chr1:15909321|15916279	+	9	25	15	5
Chr1	15909321	15919051	Chr1:15909321|15919051	+	2	4	1	3
Chr1	15909321	15920983	Chr1:15909321|15920983	+	8	5	2	1
Chr1	15909321	15922349	Chr1:15909321|15922349	+	1	14	11	7
Chr1	15909324	15920983	Chr1:15909324|15920983	+	1	3	0	0
Chr1	15911101	15916279	Chr1:15911101|15916279	+	32	56	39	33
Chr1	15911101	15920983	Chr1:15911101|15920983	+	1	0	0	0
Chr1	15916128	15922349	Chr1:15916128|15922349	+	12	10	8	3
Chr1	15918926	15922349	Chr1:15918926|15922349	+	7	5	3	0
Chr1	15937163	15938006	Chr1:15937163|15938006	+	1	3	7	0
Chr1	16137853	16138430	Chr1:16137853|16138430	-	22	41	9	15
Chr1	16164471	16168253	Chr1:16164471|16168253	+	8	0	0	1
Chr1	16201782	16202574	Chr1:16201782|16202574	-	7	10	3	7
Chr1	16253096	16256759	Chr1:16253096|16256759	-	2	0	0	0
Chr1	16294783	16315435	Chr1:16294783|16315435	-	3	11	3	5
Chr1	16294783	16316568	Chr1:16294783|16316568	-	5	1	2	3
Chr1	16294783	16316571	Chr1:16294783|16316571	-	14	0	3	6
Chr1	16294783	16328781	Chr1:16294783|16328781	-	4	0	0	0
Chr1	16305803	16315435	Chr1:16305803|16315435	-	16	10	23	19
Chr1	16305803	16316571	Chr1:16305803|16316571	-	6	7	3	2
Chr1	16305803	16327363	Chr1:16305803|16327363	-	1	0	0	0
Chr1	16410732	16437713	Chr1:16410732|16437713	+	2	0	0	0
Chr1	16455255	16478437	Chr1:16455255|16478437	-	1	0	0	0
Chr1	16484823	16631109	Chr1:16484823|16631109	-	28	0	0	0
Chr1	16485569	16631109	Chr1:16485569|16631109	-	4	0	0	0
Chr1	16608508	16632371	Chr1:16608508|16632371	-	2	0	0	0
Chr1	16625775	16627289	Chr1:16625775|16627289	-	7	6	0	0
Chr1	16628468	16633346	Chr1:16628468|16633346	-	3	0	0	3
Chr1	16630890	16635168	Chr1:16630890|16635168	-	11	1	5	5
Chr1	16986225	16990287	Chr1:16986225|16990287	-	2	0	0	0
Chr1	16991734	16997175	Chr1:16991734|16997175	-	1	0	0	0
Chr1	17000246	17005778	Chr1:17000246|17005778	-	3	0	0	0
Chr1	17005374	17005778	Chr1:17005374|17005778	-	1	0	0	0
Chr1	17022608	17024074	Chr1:17022608|17024074	-	1	4	2	4
Chr1	17408980	17422836	Chr1:17408980|17422836	-	8	0	0	0
Chr1	17409974	17416646	Chr1:17409974|17416646	-	2	1	0	0
Chr1	17410007	17438522	Chr1:17410007|17438522	-	2	0	0	0
Chr1	17412122	17413717	Chr1:17412122|17413717	-	4	0	0	0
Chr1	17413537	17422836	Chr1:17413537|17422836	-	2	2	0	0
Chr1	17416211	17422291	Chr1:17416211|17422291	-	1	0	0	0
Chr1	17416480	17422836	Chr1:17416480|17422836	-	2	5	0	2
Chr1	17416480	17429199	Chr1:17416480|17429199	-	2	0	1	0
Chr1	17422203	17425684	Chr1:17422203|17425684	-	2	1	0	0
Chr1	17580553	17588479	Chr1:17580553|17588479	+	44	32	28	55
Chr1	17580553	17603591	Chr1:17580553|17603591	+	3	0	1	0
Chr1	17602127	17607977	Chr1:17602127|17607977	+	3	10	4	3
Chr1	17637888	17640302	Chr1:17637888|17640302	+	5	0	0	0
Chr1	17648554	17664595	Chr1:17648554|17664595	+	1	0	0	2
Chr1	17654636	17656708	Chr1:17654636|17656708	+	13	0	0	0
Chr1	18735325	18735878	Chr1:18735325|18735878	+	1	0	0	0
Chr1	18883124	18890105	Chr1:18883124|18890105	-	6	0	1	2
Chr1	18911384	18921121	Chr1:18911384|18921121	-	4	0	0	0
Chr1	19119557	19123060	Chr1:19119557|19123060	-	1	0	0	0
Chr1	19128211	19138181	Chr1:19128211|19138181	-	2	0	0	0
Chr1	19140788	19141777	Chr1:19140788|19141777	-	5	0	0	3
Chr1	19156767	19160281	Chr1:19156767|19160281	-	6	4	0	2
Chr1	19168027	19170883	Chr1:19168027|19170883	-	4	0	0	0
Chr1	19168027	19173621	Chr1:19168027|19173621	-	2	0	0	0
Chr1	19172864	19175033	Chr1:19172864|19175033	-	3	6	0	0
Chr1	19176592	19184175	Chr1:19176592|19184175	-	1	0	0	0
Chr1	19176592	19187540	Chr1:19176592|19187540	-	4	4	1	3
Chr1	19183811	19185286	Chr1:19183811|19185286	-	12	10	6	5
Chr1	19186540	19187540	Chr1:19186540|19187540	-	25	20	7	1
Chr1	19193433	19197265	Chr1:19193433|19197265	-	5	5	5	9
Chr1	19193433	19201815	Chr1:19193433|19201815	-	1	2	3	0
Chr1	19232936	19245030	Chr1:19232936|19245030	-	1	0	0	0
Chr1	19235130	19239302	Chr1:19235130|19239302	-	1	0	0	0
Chr1	19238017	19241142	Chr1:19238017|19241142	-	1	0	0	0
Chr1	19283996	19308642	Chr1:19283996|19308642	-	2	0	0	0
Chr1	19284686	19308642	Chr1:19284686|19308642	-	1	0	0	0
Chr1	19296496	19296937	Chr1:19296496|19296937	+	2	0	0	0
Chr1	19306018	19308642	Chr1:19306018|19308642	-	2	4	4	4
Chr1	19317600	19317841	Chr1:19317600|19317841	+	4	0	2	0
Chr1	19344358	19357563	Chr1:19344358|19357563	-	27	7	15	9
Chr1	19356635	19357563	Chr1:19356635|19357563	-	3	0	4	3
Chr1	19356635	19385626	Chr1:19356635|19385626	-	1	0	0	0
Chr1	19356635	19419750	Chr1:19356635|19419750	-	1	0	0	2
Chr1	19378540	19419750	Chr1:19378540|19419750	-	7	7	5	2
Chr1	19622100	19626476	Chr1:19622100|19626476	+	1	0	0	0
Chr1	19694434	19740941	Chr1:19694434|19740941	-	4	0	0	0
Chr1	19700768	19740941	Chr1:19700768|19740941	-	1	0	0	0
Chr1	19737372	19747260	Chr1:19737372|19747260	-	6	0	0	0
Chr1	19755634	19787117	Chr1:19755634|19787117	-	4	0	0	3
Chr1	19770542	19793648	Chr1:19770542|19793648	-	3	0	0	0
Chr1	19771308	19787117	Chr1:19771308|19787117	-	3	0	0	2
Chr1	19890385	19897662	Chr1:19890385|19897662	+	4	0	1	3
Chr1	19890385	19904987	Chr1:19890385|19904987	+	5	0	3	3
Chr1	19890385	19907876	Chr1:19890385|19907876	+	6	15	11	6
Chr1	19904267	19904987	Chr1:19904267|19904987	+	1	0	0	0
Chr1	19904267	19908099	Chr1:19904267|19908099	+	4	0	0	0
Chr1	20628662	20630217	Chr1:20628662|20630217	-	1	0	0	0
Chr1	20639892	20645723	Chr1:20639892|20645723	+	4	0	1	0
Chr1	20648315	20649353	Chr1:20648315|20649353	-	10	16	0	2
Chr1	20682653	20690335	Chr1:20682653|20690335	-	8	0	2	0
Chr1	20698379	20704899	Chr1:20698379|20704899	-	12	4	1	4
Chr1	20713454	20715639	Chr1:20713454|20715639	-	3	6	0	1
Chr1	20741831	20780540	Chr1:20741831|20780540	-	3	0	0	0
Chr1	20744744	20757256	Chr1:20744744|20757256	-	3	0	0	4
Chr1	20744744	20773610	Chr1:20744744|20773610	-	10	31	7	5
Chr1	20744744	20780540	Chr1:20744744|20780540	-	11	25	2	20
Chr1	20746891	20773610	Chr1:20746891|20773610	-	1	0	0	0
Chr1	20747544	20749975	Chr1:20747544|20749975	-	4	4	4	0
Chr1	20747544	20776750	Chr1:20747544|20776750	-	1	0	0	0
Chr1	20749723	20773610	Chr1:20749723|20773610	-	67	62	31	36
Chr1	20757166	20773610	Chr1:20757166|20773610	-	72	120	68	96
Chr1	20757166	20776750	Chr1:20757166|20776750	-	1	8	0	7
Chr1	20757166	20779911	Chr1:20757166|20779911	-	1	6	4	3
Chr1	20757166	20780540	Chr1:20757166|20780540	-	4	35	4	23
Chr1	20765377	20773610	Chr1:20765377|20773610	-	11	19	24	11
Chr1	20765377	20779911	Chr1:20765377|20779911	-	2	0	3	1
Chr1	20767584	20773610	Chr1:20767584|20773610	-	2	0	0	0
Chr1	20770930	20773610	Chr1:20770930|20773610	-	13	31	36	50
Chr1	20770930	20779911	Chr1:20770930|20779911	-	7	0	0	0
Chr1	20773451	20779911	Chr1:20773451|20779911	-	1	2	0	0
Chr1	20807152	20810884	Chr1:20807152|20810884	-	1	0	0	4
Chr1	20807152	20813239	Chr1:20807152|20813239	-	1	0	0	4
Chr1	20857403	20862332	Chr1:20857403|20862332	-	1	2	9	10
Chr1	20857403	20886371	Chr1:20857403|20886371	-	1	0	2	10
Chr1	20865116	20895501	Chr1:20865116|20895501	-	1	0	0	0
Chr1	20879282	20904971	Chr1:20879282|20904971	-	4	0	0	0
Chr1	20879323	20895501	Chr1:20879323|20895501	-	3	0	1	3
Chr1	20886201	20899943	Chr1:20886201|20899943	-	5	0	0	3
Chr1	20892619	20895501	Chr1:20892619|20895501	-	2	0	0	2
Chr1	20892619	20904971	Chr1:20892619|20904971	-	6	2	2	0
Chr1	20893517	20904971	Chr1:20893517|20904971	-	22	9	13	8
Chr1	20893517	20942330	Chr1:20893517|20942330	-	1	17	5	8
Chr1	20899697	20904971	Chr1:20899697|20904971	-	1	0	0	1
Chr1	20899697	20941395	Chr1:20899697|20941395	-	3	0	0	0
Chr1	20904883	20942330	Chr1:20904883|20942330	-	9	34	3	27
Chr1	20941259	20942330	Chr1:20941259|20942330	-	1	0	0	6
Chr1	20941491	20942330	Chr1:20941491|20942330	-	4	4	2	5
Chr1	20941491	20950111	Chr1:20941491|20950111	-	3	3	4	5
Chr1	20950003	20981227	Chr1:20950003|20981227	-	1	0	0	0
Chr1	20969474	20980448	Chr1:20969474|20980448	-	2	5	7	2
Chr1	20969474	20981227	Chr1:20969474|20981227	-	13	60	29	30
Chr1	20969474	21001304	Chr1:20969474|21001304	-	2	0	0	0
Chr1	20969474	21002808	Chr1:20969474|21002808	-	9	16	21	19
Chr1	20980334	20981227	Chr1:20980334|20981227	-	13	5	12	23
Chr1	20980334	21002808	Chr1:20980334|21002808	-	9	8	5	4
Chr1	20980334	21050994	Chr1:20980334|21050994	-	3	0	3	12
Chr1	20980334	21089213	Chr1:20980334|21089213	-	1	4	0	3
Chr1	20997601	21002808	Chr1:20997601|21002808	-	3	3	1	3
Chr1	20997601	21020621	Chr1:20997601|21020621	-	2	0	0	0
Chr1	20997601	21050994	Chr1:20997601|21050994	-	2	1	0	0
Chr1	21001199	21002808	Chr1:21001199|21002808	-	7	10	14	31
Chr1	21001199	21050994	Chr1:21001199|21050994	-	24	53	10	24
Chr1	21001199	21089213	Chr1:21001199|21089213	-	5	26	9	3
Chr1	21001199	21111383	Chr1:21001199|21111383	-	6	23	11	11
Chr1	21002713	21050994	Chr1:21002713|21050994	-	3	0	0	4
Chr1	21002713	21089213	Chr1:21002713|21089213	-	12	35	13	27
Chr1	21002713	21111383	Chr1:21002713|21111383	-	75	110	53	69
Chr1	21050866	21089213	Chr1:21050866|21089213	-	26	32	31	38
Chr1	21050866	21105255	Chr1:21050866|21105255	-	3	0	0	0
Chr1	21050866	21111383	Chr1:21050866|21111383	-	36	56	109	95
Chr1	21050866	21150974	Chr1:21050866|21150974	-	2	0	0	0
Chr1	21059725	21089213	Chr1:21059725|21089213	-	2	0	1	5
Chr1	21064760	21089213	Chr1:21064760|21089213	-	4	0	2	2
Chr1	21072852	21089213	Chr1:21072852|21089213	-	1	0	0	5
Chr1	21073022	21111383	Chr1:21073022|21111383	-	2	0	0	0
Chr1	21073463	21089213	Chr1:21073463|21089213	-	9	0	8	7
Chr1	21073463	21111383	Chr1:21073463|21111383	-	2	5	4	3
Chr1	21089138	21111383	Chr1:21089138|21111383	-	76	33	85	95
Chr1	21089138	21123555	Chr1:21089138|21123555	-	1	9	10	10
Chr1	21089138	21123908	Chr1:21089138|21123908	-	1	0	0	0
Chr1	21089138	21126199	Chr1:21089138|21126199	-	1	0	2	3
Chr1	21098215	21137808	Chr1:21098215|21137808	-	2	0	0	0
Chr1	21219959	21221842	Chr1:21219959|21221842	-	1	0	1	3
Chr1	21219959	21225440	Chr1:21219959|21225440	-	1	0	0	0
Chr1	21221747	21225440	Chr1:21221747|21225440	-	3	0	0	0
Chr1	21221747	21228041	Chr1:21221747|21228041	-	2	0	0	1
Chr1	21247221	21256138	Chr1:21247221|21256138	-	1	3	0	3
Chr1	21255947	21272911	Chr1:21255947|21272911	-	1	0	0	0
Chr1	21257525	21260392	Chr1:21257525|21260392	-	3	0	0	2
Chr1	21260271	21272911	Chr1:21260271|21272911	-	7	0	2	0
Chr1	21272699	21279332	Chr1:21272699|21279332	-	10	2	0	4
Chr1	21272699	21290156	Chr1:21272699|21290156	-	29	97	49	21
Chr1	21470632	21472915	Chr1:21470632|21472915	+	1	0	0	0
Chr1	21470632	21473585	Chr1:21470632|21473585	+	1	0	0	1
Chr1	21472843	21474951	Chr1:21472843|21474951	+	1	5	0	0
Chr1	21680808	21695221	Chr1:21680808|21695221	-	7	14	22	11
Chr1	21689974	21703618	Chr1:21689974|21703618	-	1	0	0	0
Chr1	21704262	21706868	Chr1:21704262|21706868	-	2	0	0	0
Chr1	21706126	21715457	Chr1:21706126|21715457	-	1	0	0	0
Chr1	21715389	21721764	Chr1:21715389|21721764	-	25	39	55	68
Chr1	21715389	21724095	Chr1:21715389|21724095	-	14	20	21	14
Chr1	21721036	21721764	Chr1:21721036|21721764	-	7	0	2	6
Chr1	21721036	21724095	Chr1:21721036|21724095	-	1	5	4	0
Chr1	21736446	21757783	Chr1:21736446|21757783	-	2	0	0	0
Chr1	21747067	21751615	Chr1:21747067|21751615	-	7	0	4	2
Chr1	21747067	21753119	Chr1:21747067|21753119	-	6	0	7	2
Chr1	21747067	21757783	Chr1:21747067|21757783	-	6	0	6	6
Chr1	21748138	21751615	Chr1:21748138|21751615	-	20	1	18	30
Chr1	21748138	21753119	Chr1:21748138|21753119	-	15	12	10	17
Chr1	21748138	21756963	Chr1:21748138|21756963	-	1	0	0	0
Chr1	21748138	21757783	Chr1:21748138|21757783	-	2	0	1	0
Chr1	21752527	21757783	Chr1:21752527|21757783	-	2	0	0	0
Chr1	21838825	21840017	Chr1:21838825|21840017	-	4	3	0	1
Chr1	21838923	21839841	Chr1:21838923|21839841	+	1	0	0	0
Chr1	21847354	21849031	Chr1:21847354|21849031	-	4	0	8	0
Chr1	21864100	21865809	Chr1:21864100|21865809	-	3	0	0	0
Chr1	22071414	22086866	Chr1:22071414|22086866	+	1	0	0	0
Chr1	22074094	22086866	Chr1:22074094|22086866	+	5	0	1	0
Chr1	22078429	22086866	Chr1:22078429|22086866	+	264	407	213	152
Chr1	22078429	22087834	Chr1:22078429|22087834	+	2	0	0	0
Chr1	22078429	22091501	Chr1:22078429|22091501	+	57	89	46	62
Chr1	22078429	22091674	Chr1:22078429|22091674	+	3	6	2	5
Chr1	22078429	22094136	Chr1:22078429|22094136	+	1	18	10	6
Chr1	22078429	22097968	Chr1:22078429|22097968	+	1	12	5	0
Chr1	22081722	22091501	Chr1:22081722|22091501	+	1	0	0	0
Chr1	22086439	22094136	Chr1:22086439|22094136	+	3	0	0	0
Chr1	22091428	22172230	Chr1:22091428|22172230	+	3	6	2	2
Chr1	22154903	22188935	Chr1:22154903|22188935	+	2	0	3	2
Chr1	22170166	22188935	Chr1:22170166|22188935	+	3	0	0	0
Chr1	22177203	22188935	Chr1:22177203|22188935	+	3	0	3	4
Chr1	22184799	22188935	Chr1:22184799|22188935	+	1	0	0	0
Chr1	22236078	22236874	Chr1:22236078|22236874	+	5	0	0	0
Chr1	22489880	22491533	Chr1:22489880|22491533	+	28	72	23	33
Chr1	22501492	22502441	Chr1:22501492|22502441	+	6	0	6	1
Chr1	22781421	22785076	Chr1:22781421|22785076	+	3	15	5	9
Chr1	23030443	23050520	Chr1:23030443|23050520	+	1	0	0	4
Chr1	23030469	23040434	Chr1:23030469|23040434	+	6	10	8	9
Chr1	23030469	23044486	Chr1:23030469|23044486	+	7	2	15	3
Chr1	23030469	23050520	Chr1:23030469|23050520	+	163	265	338	307
Chr1	23030469	23053839	Chr1:23030469|23053839	+	2	6	1	1
Chr1	23030469	23057565	Chr1:23030469|23057565	+	3	7	0	0
Chr1	23030469	23059167	Chr1:23030469|23059167	+	55	115	56	81
Chr1	23040259	23050520	Chr1:23040259|23050520	+	2	0	1	2
Chr1	23040259	23059167	Chr1:23040259|23059167	+	2	0	2	2
Chr1	23050387	23059167	Chr1:23050387|23059167	+	37	54	27	34
Chr1	23053761	23069151	Chr1:23053761|23069151	+	3	0	0	0
Chr1	23055069	23057565	Chr1:23055069|23057565	+	1	0	4	5
Chr1	23055069	23069151	Chr1:23055069|23069151	+	10	8	2	6
Chr1	23055069	23073403	Chr1:23055069|23073403	+	1	4	3	1
Chr1	23059073	23069151	Chr1:23059073|23069151	+	1	0	0	1
Chr1	23068539	23082366	Chr1:23068539|23082366	+	2	0	0	0
Chr1	23077228	23079667	Chr1:23077228|23079667	+	5	0	0	0
Chr1	23240009	23274213	Chr1:23240009|23274213	-	2	0	0	0
Chr1	23282894	23289185	Chr1:23282894|23289185	-	11	4	0	0
Chr1	23282894	23306503	Chr1:23282894|23306503	-	1	0	0	0
Chr1	23318483	23333631	Chr1:23318483|23333631	-	2	0	0	2
Chr1	23321528	23341017	Chr1:23321528|23341017	-	4	0	0	0
Chr1	23333518	23338608	Chr1:23333518|23338608	-	4	2	1	5
Chr1	23333518	23341017	Chr1:23333518|23341017	-	8	13	11	3
Chr1	23333518	23341020	Chr1:23333518|23341020	-	8	13	17	3
Chr1	23333518	23341038	Chr1:23333518|23341038	-	2	4	0	0
Chr1	23451479	23456194	Chr1:23451479|23456194	-	1	0	4	2
Chr1	23516335	23519108	Chr1:23516335|23519108	-	2	4	0	3
Chr1	23692609	23694791	Chr1:23692609|23694791	+	3	0	0	0
Chr1	23692609	23695908	Chr1:23692609|23695908	+	2	0	0	0
Chr1	23749021	23752518	Chr1:23749021|23752518	+	4	0	0	1
Chr1	23750845	23752518	Chr1:23750845|23752518	+	6	0	3	0
Chr1	23759512	23759813	Chr1:23759512|23759813	+	5	7	0	2
Chr1	23797034	23799436	Chr1:23797034|23799436	-	1	0	0	0
Chr1	23797695	23799436	Chr1:23797695|23799436	-	7	0	2	0
Chr1	23804400	23820593	Chr1:23804400|23820593	-	5	0	1	1
Chr1	23804400	23826183	Chr1:23804400|23826183	-	1	0	0	0
Chr1	23814190	23820593	Chr1:23814190|23820593	-	12	21	15	9
Chr1	23854360	23865625	Chr1:23854360|23865625	-	1	2	0	0
Chr1	23967619	23975095	Chr1:23967619|23975095	-	1	0	0	0
Chr1	23971573	23978817	Chr1:23971573|23978817	-	1	0	0	0
Chr1	23971850	23975113	Chr1:23971850|23975113	-	2	0	1	0
Chr1	24169417	24180854	Chr1:24169417|24180854	-	30	7	31	9
Chr1	24419291	24419640	Chr1:24419291|24419640	+	1	0	0	0
Chr1	24440172	24445244	Chr1:24440172|24445244	+	7	19	15	5
Chr1	24453408	24456273	Chr1:24453408|24456273	+	3	0	0	0
Chr1	24456138	24460544	Chr1:24456138|24460544	+	1	0	0	1
Chr1	24514314	24514567	Chr1:24514314|24514567	+	4	3	40	17
Chr1	24531218	24533254	Chr1:24531218|24533254	+	4	0	15	7
Chr1	24646667	24649029	Chr1:24646667|24649029	+	3	4	4	13
Chr1	24660719	24663224	Chr1:24660719|24663224	+	7	2	1	4
Chr1	24797742	24827116	Chr1:24797742|24827116	+	11	2	4	5
Chr1	25242374	25244498	Chr1:25242374|25244498	-	3	0	0	5
Chr1	25340474	25351693	Chr1:25340474|25351693	+	2	0	17	7
Chr1	25340474	25356853	Chr1:25340474|25356853	+	2	0	3	2
Chr1	25446762	25458892	Chr1:25446762|25458892	+	1	0	0	7
Chr1	25448808	25456831	Chr1:25448808|25456831	+	14	6	8	5
Chr1	25448808	25458892	Chr1:25448808|25458892	+	1	0	0	3
Chr1	25448880	25458444	Chr1:25448880|25458444	+	1	0	0	0
Chr1	25454259	25458892	Chr1:25454259|25458892	+	1	0	0	1
Chr1	25553922	25557267	Chr1:25553922|25557267	+	14	23	7	8
Chr1	25553922	25565207	Chr1:25553922|25565207	+	1	0	4	0
Chr1	25553922	25581772	Chr1:25553922|25581772	+	1	0	0	1
Chr1	25562644	25565207	Chr1:25562644|25565207	+	4	0	0	0
Chr1	25580697	25581772	Chr1:25580697|25581772	+	3	0	0	0
Chr1	25801043	25809820	Chr1:25801043|25809820	+	1	0	0	0
Chr1	25805142	25811879	Chr1:25805142|25811879	+	1	0	0	0
Chr1	25808580	25811879	Chr1:25808580|25811879	+	1	3	0	0
Chr1	25809683	25811535	Chr1:25809683|25811535	+	4	0	0	0
Chr1	25960331	25976773	Chr1:25960331|25976773	-	1	0	0	0
Chr1	25961841	25976773	Chr1:25961841|25976773	-	2	0	0	0
Chr1	25982364	25984528	Chr1:25982364|25984528	-	6	0	1	0
Chr1	25988231	25990863	Chr1:25988231|25990863	-	3	0	2	1
Chr1	26237785	26244318	Chr1:26237785|26244318	+	3	0	5	0
Chr1	26239762	26259802	Chr1:26239762|26259802	+	2	13	0	11
Chr1	26255171	26255865	Chr1:26255171|26255865	+	21	15	11	6
Chr1	26255171	26259802	Chr1:26255171|26259802	+	4	8	1	8
Chr1	26257597	26259802	Chr1:26257597|26259802	+	142	127	105	91
Chr1	26257597	26272071	Chr1:26257597|26272071	+	2	0	2	0
Chr1	26268483	26269614	Chr1:26268483|26269614	+	16	33	26	15
Chr1	26294205	26298062	Chr1:26294205|26298062	-	4	13	12	2
Chr1	26328209	26328873	Chr1:26328209|26328873	-	1	0	0	2
Chr1	26432891	26460144	Chr1:26432891|26460144	+	4	2	2	1
Chr1	26439477	26463433	Chr1:26439477|26463433	-	1	0	0	0
Chr1	26442708	26447660	Chr1:26442708|26447660	+	2	0	0	2
Chr1	26444811	26463433	Chr1:26444811|26463433	-	3	0	0	3
Chr1	26446271	26460144	Chr1:26446271|26460144	+	3	0	0	0
Chr1	26446316	26460144	Chr1:26446316|26460144	+	15	11	12	2
Chr1	26447559	26460144	Chr1:26447559|26460144	+	8	12	16	4
Chr1	26453609	26463433	Chr1:26453609|26463433	-	8	0	6	11
Chr1	26558807	26561663	Chr1:26558807|26561663	+	3	0	0	0
Chr1	26560726	26561663	Chr1:26560726|26561663	+	3	0	2	1
Chr1	26571449	26573361	Chr1:26571449|26573361	+	1	0	0	0
Chr1	26729651	26732792	Chr1:26729651|26732792	+	6	7	13	3
Chr1	26848608	26853825	Chr1:26848608|26853825	+	1	5	0	0
Chr1	26884125	26886133	Chr1:26884125|26886133	-	2	0	1	5
Chr1	26884125	26889125	Chr1:26884125|26889125	-	3	0	0	0
Chr1	26892411	26897725	Chr1:26892411|26897725	-	1	0	0	0
Chr1	26897301	26897725	Chr1:26897301|26897725	-	5	0	14	6
Chr1	26941457	26941818	Chr1:26941457|26941818	+	18	19	43	40
Chr1	26942660	26943065	Chr1:26942660|26943065	+	40	46	443	226
Chr1	27105885	27109777	Chr1:27105885|27109777	-	2	0	2	2
Chr1	27113791	27114286	Chr1:27113791|27114286	-	19	7	0	3
Chr1	27113826	27114286	Chr1:27113826|27114286	-	8	10	0	1
Chr1	27260956	27287861	Chr1:27260956|27287861	+	1	0	7	3
Chr1	27287674	27301461	Chr1:27287674|27301461	+	1	0	0	0
Chr1	27361705	27364394	Chr1:27361705|27364394	-	2	0	0	0
Chr1	27414833	27428933	Chr1:27414833|27428933	-	3	0	0	1
Chr1	27558305	27558883	Chr1:27558305|27558883	-	5	9	1	2
Chr1	27668226	27669346	Chr1:27668226|27669346	-	1	5	10	3
Chr1	27744654	27755330	Chr1:27744654|27755330	+	3	0	0	0
Chr1	27789562	27793632	Chr1:27789562|27793632	+	1	0	0	3
Chr1	27789562	27801815	Chr1:27789562|27801815	+	1	4	0	0
Chr1	27793533	27812268	Chr1:27793533|27812268	+	1	3	0	0
Chr1	27838699	27841234	Chr1:27838699|27841234	+	5	0	0	0
Chr1	27838699	27843330	Chr1:27838699|27843330	+	5	8	2	1
Chr1	27838777	27843330	Chr1:27838777|27843330	+	3	0	0	1
Chr1	27841014	27843330	Chr1:27841014|27843330	+	9	2	6	7
Chr1	27892063	27894397	Chr1:27892063|27894397	-	1	0	4	0
Chr1	27897005	27907282	Chr1:27897005|27907282	-	3	0	0	0
Chr1	27988535	28004419	Chr1:27988535|28004419	-	8	16	3	13
Chr1	28010947	28017239	Chr1:28010947|28017239	-	15	7	6	15
Chr1	28010947	28058094	Chr1:28010947|28058094	-	1	0	0	1
Chr1	28011306	28011711	Chr1:28011306|28011711	-	5	0	3	10
Chr1	28027789	28042650	Chr1:28027789|28042650	-	1	6	0	0
Chr1	28027789	28058094	Chr1:28027789|28058094	-	6	4	0	4
Chr1	28035544	28048426	Chr1:28035544|28048426	-	43	28	7	20
Chr1	28035544	28058094	Chr1:28035544|28058094	-	108	91	17	70
Chr1	28038839	28080451	Chr1:28038839|28080451	-	2	0	0	0
Chr1	28243522	28246753	Chr1:28243522|28246753	-	3	0	2	2
Chr1	28271674	28275015	Chr1:28271674|28275015	+	5	6	0	0
Chr1	28274825	28279241	Chr1:28274825|28279241	+	14	15	9	9
Chr1	28407410	28408135	Chr1:28407410|28408135	+	13	18	7	6
Chr1	28407410	28459258	Chr1:28407410|28459258	+	5	3	3	3
Chr1	28457832	28465849	Chr1:28457832|28465849	+	1	0	2	0
Chr1	28459085	28465849	Chr1:28459085|28465849	+	2	0	0	2
Chr1	28459085	28466535	Chr1:28459085|28466535	+	13	19	14	16
Chr1	28459085	28480604	Chr1:28459085|28480604	+	4	0	0	1
Chr1	28473554	28480604	Chr1:28473554|28480604	+	1	10	3	1
Chr1	28473554	28489225	Chr1:28473554|28489225	+	1	0	4	0
Chr1	28476107	28480604	Chr1:28476107|28480604	+	2	0	8	5
Chr1	28476107	28491012	Chr1:28476107|28491012	+	1	0	0	1
Chr1	28476112	28480604	Chr1:28476112|28480604	+	3	3	6	3
Chr1	28489170	28493091	Chr1:28489170|28493091	+	1	0	0	1
Chr1	28529858	28532350	Chr1:28529858|28532350	+	3	0	4	0
Chr1	28531803	28532350	Chr1:28531803|28532350	+	3	0	1	2
Chr1	28553640	28564985	Chr1:28553640|28564985	+	2	0	0	0
Chr1	28553640	28571900	Chr1:28553640|28571900	+	1	4	5	1
Chr1	28560633	28561398	Chr1:28560633|28561398	+	3	0	0	1
Chr1	28580560	28581229	Chr1:28580560|28581229	-	6	12	15	10
Chr1	28589503	28613361	Chr1:28589503|28613361	-	1	0	0	0
Chr1	28605372	28622165	Chr1:28605372|28622165	-	3	23	5	6
Chr1	28683583	28691709	Chr1:28683583|28691709	+	7	7	1	4
Chr1	28683583	28697084	Chr1:28683583|28697084	+	6	6	2	7
Chr1	28683583	28702569	Chr1:28683583|28702569	+	2	0	2	1
Chr1	28683583	28704329	Chr1:28683583|28704329	+	1	0	7	3
Chr1	28683586	28697084	Chr1:28683586|28697084	+	1	0	0	0
Chr1	28691585	28697084	Chr1:28691585|28697084	+	6	0	0	2
Chr1	28692942	28704329	Chr1:28692942|28704329	+	2	0	0	0
Chr1	28702438	28704329	Chr1:28702438|28704329	+	1	0	6	7
Chr1	28738259	28743986	Chr1:28738259|28743986	+	1	1	0	0
Chr1	28742403	28743986	Chr1:28742403|28743986	+	25	69	14	45
Chr1	28987431	28987905	Chr1:28987431|28987905	+	10	12	10	2
Chr1	28987431	28997319	Chr1:28987431|28997319	+	8	15	13	18
Chr1	28987431	29065158	Chr1:28987431|29065158	+	5	0	0	2
Chr1	28993330	28997319	Chr1:28993330|28997319	+	7	1	1	4
Chr1	28993330	29018442	Chr1:28993330|29018442	+	3	15	0	3
Chr1	29015692	29033245	Chr1:29015692|29033245	+	2	0	0	0
Chr1	29035826	29039426	Chr1:29035826|29039426	+	4	5	35	16
Chr1	29035826	29053312	Chr1:29035826|29053312	+	17	12	8	4
Chr1	29035826	29065158	Chr1:29035826|29065158	+	1	8	4	3
Chr1	29053104	29097935	Chr1:29053104|29097935	+	3	0	0	2
Chr1	29060422	29097935	Chr1:29060422|29097935	+	5	6	0	0
Chr1	29096155	29097935	Chr1:29096155|29097935	+	6	0	1	1
Chr1	29142922	29159486	Chr1:29142922|29159486	-	4	0	0	0
Chr1	29142922	29160517	Chr1:29142922|29160517	-	1	0	3	0
Chr1	29142922	29168638	Chr1:29142922|29168638	-	2	0	0	0
Chr1	29149009	29160517	Chr1:29149009|29160517	-	11	16	20	6
Chr1	29149009	29168638	Chr1:29149009|29168638	-	1	22	8	4
Chr1	29150103	29166912	Chr1:29150103|29166912	-	1	0	0	0
Chr1	29154696	29168638	Chr1:29154696|29168638	-	1	0	0	1
Chr1	29159374	29166912	Chr1:29159374|29166912	-	4	0	2	1
Chr1	29195941	29200589	Chr1:29195941|29200589	-	1	0	0	0
Chr1	29255275	29260903	Chr1:29255275|29260903	+	6	10	2	14
Chr1	29258505	29260903	Chr1:29258505|29260903	+	11	0	0	5
Chr1	29275448	29275756	Chr1:29275448|29275756	+	8	0	2	5
Chr1	29282676	29284869	Chr1:29282676|29284869	+	12	17	12	9
Chr1	29282676	29292026	Chr1:29282676|29292026	+	5	0	0	0
Chr1	29311456	29312706	Chr1:29311456|29312706	+	1	0	0	2
Chr1	30941151	30945483	Chr1:30941151|30945483	-	1	0	4	0
Chr1	30941151	30950261	Chr1:30941151|30950261	-	3	6	0	0
Chr1	30941151	30954004	Chr1:30941151|30954004	-	2	0	0	0
Chr1	30945346	30952363	Chr1:30945346|30952363	-	1	0	0	0
Chr1	30945346	30953981	Chr1:30945346|30953981	-	3	10	0	0
Chr1	30950133	30968492	Chr1:30950133|30968492	-	1	0	0	0
Chr1	30964674	30974802	Chr1:30964674|30974802	-	3	0	0	0
Chr1	30974651	30981405	Chr1:30974651|30981405	-	45	19	21	20
Chr1	30974651	30982640	Chr1:30974651|30982640	-	13	11	4	6
Chr1	30980062	30982640	Chr1:30980062|30982640	-	6	6	4	17
Chr1	30992390	30995220	Chr1:30992390|30995220	-	78	73	155	119
Chr1	30992390	31007099	Chr1:30992390|31007099	-	12	10	14	17
Chr1	30992390	31007102	Chr1:30992390|31007102	-	21	35	67	55
Chr1	31005853	31007099	Chr1:31005853|31007099	-	11	0	4	3
Chr1	31005853	31007102	Chr1:31005853|31007102	-	43	22	69	45
Chr1	31005853	31028864	Chr1:31005853|31028864	-	2	11	7	2
Chr1	31028796	31059577	Chr1:31028796|31059577	-	1	4	23	9
Chr1	31055313	31059577	Chr1:31055313|31059577	-	7	19	21	7
Chr1	31059204	31059577	Chr1:31059204|31059577	-	48	22	96	48
Chr1	31267871	31292006	Chr1:31267871|31292006	-	12	9	2	10
Chr1	31281374	31292006	Chr1:31281374|31292006	-	4	7	3	2
Chr1	31310044	31339048	Chr1:31310044|31339048	+	4	7	4	5
Chr1	31310044	31348974	Chr1:31310044|31348974	+	7	0	0	0
Chr1	31318167	31339048	Chr1:31318167|31339048	+	4	4	0	0
Chr1	31318167	31348974	Chr1:31318167|31348974	+	3	5	0	3
Chr1	31336118	31339048	Chr1:31336118|31339048	+	1	0	0	0
Chr1	31337175	31348974	Chr1:31337175|31348974	+	116	91	66	60
Chr1	31907661	31911826	Chr1:31907661|31911826	-	1	3	2	2
Chr1	31910038	31913023	Chr1:31910038|31913023	-	2	0	0	0
Chr1	31911696	31919658	Chr1:31911696|31919658	-	5	7	1	2
Chr1	31915895	31919658	Chr1:31915895|31919658	-	241	500	194	276
Chr1	31918970	31919658	Chr1:31918970|31919658	-	15	19	2	6
Chr1	32030298	32033334	Chr1:32030298|32033334	+	30	65	44	63
Chr1	32030298	32033399	Chr1:32030298|32033399	+	3	2	4	2
Chr1	32030298	32038036	Chr1:32030298|32038036	+	2	0	0	0
Chr1	32030298	32038619	Chr1:32030298|32038619	+	7	0	5	14
Chr1	32030298	32045390	Chr1:32030298|32045390	+	7	23	14	10
Chr1	32031524	32038619	Chr1:32031524|32038619	+	4	0	0	1
Chr1	32036910	32038619	Chr1:32036910|32038619	+	31	32	53	36
Chr1	32036910	32039573	Chr1:32036910|32039573	+	18	22	18	21
Chr1	32036910	32045390	Chr1:32036910|32045390	+	10	0	0	0
Chr1	32037835	32039573	Chr1:32037835|32039573	+	11	8	6	6
Chr1	32094784	32100562	Chr1:32094784|32100562	+	17	31	8	13
Chr1	32139179	32171206	Chr1:32139179|32171206	+	5	0	0	0
Chr1	32154588	32157445	Chr1:32154588|32157445	+	1	0	0	0
Chr1	32154588	32158361	Chr1:32154588|32158361	+	12	15	4	8
Chr1	32154588	32159531	Chr1:32154588|32159531	+	1	15	12	5
Chr1	32154588	32160703	Chr1:32154588|32160703	+	1	0	0	0
Chr1	32157346	32162046	Chr1:32157346|32162046	+	1	0	0	0
Chr1	32160615	32163313	Chr1:32160615|32163313	+	2	0	0	0
Chr1	32161947	32167296	Chr1:32161947|32167296	+	3	5	0	0
Chr1	32184525	32188124	Chr1:32184525|32188124	+	2	8	14	5
Chr1	32184525	32190249	Chr1:32184525|32190249	+	6	5	2	1
Chr1	32187954	32190249	Chr1:32187954|32190249	+	49	57	46	24
Chr1	32187954	32194937	Chr1:32187954|32194937	+	5	0	2	0
Chr1	32224034	32224475	Chr1:32224034|32224475	+	22	6	12	6
Chr1	32224034	32226530	Chr1:32224034|32226530	+	9	0	0	0
Chr1	32224034	32231019	Chr1:32224034|32231019	+	1	0	0	0
Chr1	32224410	32229024	Chr1:32224410|32229024	+	1	0	2	0
Chr1	32326939	32327677	Chr1:32326939|32327677	+	12	4	15	9
Chr1	32368447	32376741	Chr1:32368447|32376741	-	3	4	2	0
Chr1	32376262	32381268	Chr1:32376262|32381268	-	2	0	2	0
Chr1	32381214	32386895	Chr1:32381214|32386895	-	1	0	3	0
Chr1	32470584	32471615	Chr1:32470584|32471615	+	1	0	0	0
Chr1	32521276	32553540	Chr1:32521276|32553540	+	2	6	3	1
Chr1	32553459	32560410	Chr1:32553459|32560410	+	1	0	0	0
Chr1	32553459	32593754	Chr1:32553459|32593754	+	1	0	0	0
Chr1	32553459	32595223	Chr1:32553459|32595223	+	1	0	0	0
Chr1	32592931	32593754	Chr1:32592931|32593754	+	8	19	9	6
Chr1	32592931	32595223	Chr1:32592931|32595223	+	2	1	0	2
Chr1	32619560	32634110	Chr1:32619560|32634110	-	1	0	0	0
Chr1	32619560	32634792	Chr1:32619560|32634792	-	4	0	3	2
Chr1	32631827	32634072	Chr1:32631827|32634072	-	3	0	0	0
Chr1	32631827	32634110	Chr1:32631827|32634110	-	3	0	5	5
Chr1	32631827	32634792	Chr1:32631827|32634792	-	1	0	5	0
Chr1	32633645	32634110	Chr1:32633645|32634110	-	1	0	0	0
Chr1	32660606	32672901	Chr1:32660606|32672901	+	1	0	0	0
Chr1	32668225	32672901	Chr1:32668225|32672901	+	2	13	0	8
Chr1	32668739	32669357	Chr1:32668739|32669357	+	2	0	0	0
Chr1	32779382	32781145	Chr1:32779382|32781145	-	7	16	6	9
Chr1	32786362	32791254	Chr1:32786362|32791254	-	6	0	5	3
Chr1	32786362	32797843	Chr1:32786362|32797843	-	4	2	2	0
Chr1	32797112	32797843	Chr1:32797112|32797843	-	4	0	0	0
Chr1	32797416	32797843	Chr1:32797416|32797843	-	1	0	0	0
Chr1	32806482	32811057	Chr1:32806482|32811057	-	2	8	5	4
Chr1	32810591	32811057	Chr1:32810591|32811057	-	4	7	14	5
Chr1	32825313	32828081	Chr1:32825313|32828081	+	2	3	4	1
Chr1	32825313	32830067	Chr1:32825313|32830067	+	32	49	9	25
Chr1	32825313	32834061	Chr1:32825313|32834061	+	3	8	0	7
Chr1	32825313	32853166	Chr1:32825313|32853166	+	2	20	3	9
Chr1	32938397	32945628	Chr1:32938397|32945628	-	4	0	0	4
Chr1	32942252	32945628	Chr1:32942252|32945628	-	1	4	0	1
Chr1	32942252	32949774	Chr1:32942252|32949774	-	7	4	0	0
Chr1	32944019	32945628	Chr1:32944019|32945628	-	2	6	5	4
Chr1	32944019	32949774	Chr1:32944019|32949774	-	3	4	3	1
Chr1	32948222	32949774	Chr1:32948222|32949774	-	88	74	67	52
Chr1	33013207	33014594	Chr1:33013207|33014594	-	8	6	6	7
Chr1	33158253	33159944	Chr1:33158253|33159944	-	1	1	0	0
Chr1	33231407	33238935	Chr1:33231407|33238935	+	2	0	2	0
Chr1	33294937	33295305	Chr1:33294937|33295305	+	17	36	36	59
Chr1	33294937	33299025	Chr1:33294937|33299025	+	2	0	0	0
Chr1	33328870	33334292	Chr1:33328870|33334292	-	1	0	1	3
Chr1	33488465	33491702	Chr1:33488465|33491702	+	2	0	0	0
Chr1	33488465	33494544	Chr1:33488465|33494544	+	2	0	0	0
Chr1	35003968	35008924	Chr1:35003968|35008924	-	1	0	0	1
Chr1	35003968	35015162	Chr1:35003968|35015162	-	1	3	0	0
Chr1	35093320	35095891	Chr1:35093320|35095891	+	4	0	0	0
Chr1	35093914	35110447	Chr1:35093914|35110447	+	2	8	2	8
Chr1	35093914	35113181	Chr1:35093914|35113181	+	6	12	2	4
Chr1	35095819	35097566	Chr1:35095819|35097566	+	11	0	0	4
Chr1	35097317	35099842	Chr1:35097317|35099842	+	2	0	2	2
Chr1	35104295	35104769	Chr1:35104295|35104769	+	35	14	6	9
Chr1	35104295	35110447	Chr1:35104295|35110447	+	11	0	11	8
Chr1	35104295	35113181	Chr1:35104295|35113181	+	7	0	0	6
Chr1	35110339	35113181	Chr1:35110339|35113181	+	3	0	0	1
Chr1	35187001	35191529	Chr1:35187001|35191529	-	2	0	0	0
Chr1	35190694	35191529	Chr1:35190694|35191529	-	5	0	0	0
Chr1	35325360	35361789	Chr1:35325360|35361789	+	3	2	0	2
Chr1	35356651	35362266	Chr1:35356651|35362266	+	2	5	0	0
Chr1	35358925	35361789	Chr1:35358925|35361789	+	80	154	67	138
Chr1	35381259	35381758	Chr1:35381259|35381758	+	15	14	32	24
Chr1	35381259	35389082	Chr1:35381259|35389082	+	31	48	30	46
Chr1	35381259	35390098	Chr1:35381259|35390098	+	8	20	7	12
Chr1	35385442	35390098	Chr1:35385442|35390098	+	3	5	4	5
Chr1	35386074	35387278	Chr1:35386074|35387278	+	3	0	0	0
Chr1	35388910	35390098	Chr1:35388910|35390098	+	9	12	23	15
Chr1	35399482	35408159	Chr1:35399482|35408159	+	1	0	0	0
Chr1	35405023	35405468	Chr1:35405023|35405468	+	2	11	6	7
Chr1	35405023	35408159	Chr1:35405023|35408159	+	16	16	9	10
Chr1	35408008	35415714	Chr1:35408008|35415714	+	7	6	1	2
Chr1	35413972	35415714	Chr1:35413972|35415714	+	55	32	17	31
Chr1	35441047	35444303	Chr1:35441047|35444303	-	1	0	0	1
Chr1	35460305	35466695	Chr1:35460305|35466695	-	2	0	1	3
Chr1	35470863	35479212	Chr1:35470863|35479212	-	3	19	9	1
Chr1	35474805	35479212	Chr1:35474805|35479212	-	19	5	2	9
Chr1	35506612	35507135	Chr1:35506612|35507135	-	1	2	0	0
Chr1	35736914	35738582	Chr1:35736914|35738582	-	2	0	1	0
Chr1	35739136	35746992	Chr1:35739136|35746992	-	1	15	13	11
Chr1	35743141	35746992	Chr1:35743141|35746992	-	23	13	14	11
Chr1	35745451	35746992	Chr1:35745451|35746992	-	8	7	13	4
Chr1	35747907	35748604	Chr1:35747907|35748604	-	58	36	33	35
Chr1	35747907	35749811	Chr1:35747907|35749811	-	1	0	0	0
Chr1	35747907	35753936	Chr1:35747907|35753936	-	3	4	0	4
Chr1	35816882	35826835	Chr1:35816882|35826835	+	4	2	0	1
Chr1	35816882	35832185	Chr1:35816882|35832185	+	2	0	0	0
Chr1	35816882	35854822	Chr1:35816882|35854822	+	1	0	0	0
Chr1	35825679	35831931	Chr1:35825679|35831931	+	2	0	0	0
Chr1	35831427	35835993	Chr1:35831427|35835993	+	3	0	0	7
Chr1	35841165	35851053	Chr1:35841165|35851053	+	1	5	0	3
Chr1	35901474	35902337	Chr1:35901474|35902337	+	8	10	12	10
Chr1	35901474	35907119	Chr1:35901474|35907119	+	3	0	0	0
Chr1	35901474	35915542	Chr1:35901474|35915542	+	4	0	0	0
Chr1	35901474	35918423	Chr1:35901474|35918423	+	1	0	0	0
Chr1	35901948	35902337	Chr1:35901948|35902337	+	2	0	0	3
Chr1	35906935	35917727	Chr1:35906935|35917727	+	2	0	0	0
Chr1	35913842	35915542	Chr1:35913842|35915542	+	2	8	3	1
Chr1	35945692	35973511	Chr1:35945692|35973511	+	1	21	11	5
Chr1	35966955	35973511	Chr1:35966955|35973511	+	16	35	12	17
Chr1	35972024	35973511	Chr1:35972024|35973511	+	1	6	11	5
Chr1	35972024	35984548	Chr1:35972024|35984548	+	2	0	3	0
Chr1	35972024	36004475	Chr1:35972024|36004475	+	1	0	0	0
Chr1	35972024	36027298	Chr1:35972024|36027298	+	1	1	1	1
Chr1	35973375	35984548	Chr1:35973375|35984548	+	2	0	3	3
Chr1	36004341	36009594	Chr1:36004341|36009594	+	5	0	3	1
Chr1	36004341	36014048	Chr1:36004341|36014048	+	2	2	3	16
Chr1	36004341	36027298	Chr1:36004341|36027298	+	6	7	0	3
Chr1	36008910	36039834	Chr1:36008910|36039834	+	5	0	0	0
Chr1	36008910	36039885	Chr1:36008910|36039885	+	1	3	0	0
Chr1	36013630	36027298	Chr1:36013630|36027298	+	2	0	3	1
Chr1	36027114	36043548	Chr1:36027114|36043548	+	4	0	0	0
Chr1	36036177	36040441	Chr1:36036177|36040441	+	3	0	4	3
Chr1	36036177	36043548	Chr1:36036177|36043548	+	4	0	0	4
Chr1	36039790	36040441	Chr1:36039790|36040441	+	1	0	0	0
Chr1	36039790	36043548	Chr1:36039790|36043548	+	6	0	0	3
Chr1	36091244	36092522	Chr1:36091244|36092522	+	1	10	1	0
Chr1	36113786	36115752	Chr1:36113786|36115752	-	2	0	0	2
Chr1	36174898	36176581	Chr1:36174898|36176581	+	3	0	0	0
Chr1	36259382	36282700	Chr1:36259382|36282700	+	2	0	0	0
Chr1	36282533	36287270	Chr1:36282533|36287270	+	6	0	0	0
Chr1	36284513	36284924	Chr1:36284513|36284924	+	1	0	0	0
Chr1	36348700	36355433	Chr1:36348700|36355433	-	3	0	0	0
Chr1	36348700	36361340	Chr1:36348700|36361340	-	2	0	0	0
Chr1	36348770	36358271	Chr1:36348770|36358271	-	47	12	22	14
Chr1	36355206	36361340	Chr1:36355206|36361340	-	2	0	0	0
Chr1	36358239	36358822	Chr1:36358239|36358822	-	1	3	0	1
Chr1	36358239	36362656	Chr1:36358239|36362656	-	12	21	14	7
Chr1	36407380	36424281	Chr1:36407380|36424281	+	1	0	0	0
Chr1	36455330	36457981	Chr1:36455330|36457981	-	3	0	0	0
Chr1	37493695	37496604	Chr1:37493695|37496604	-	1	0	0	0
Chr1	37552645	37554242	Chr1:37552645|37554242	-	3	4	7	4
Chr1	37568851	37569302	Chr1:37568851|37569302	-	7	8	0	4
Chr1	37568851	37576556	Chr1:37568851|37576556	-	11	0	0	1
Chr1	37574343	37576556	Chr1:37574343|37576556	-	6	11	5	4
Chr1	37582223	37583933	Chr1:37582223|37583933	-	8	11	4	5
Chr1	37582223	37587495	Chr1:37582223|37587495	-	1	9	0	4
Chr1	37587311	37589082	Chr1:37587311|37589082	-	4	3	35	8
Chr1	37587311	37593846	Chr1:37587311|37593846	-	1	0	0	0
Chr1	37695910	37703347	Chr1:37695910|37703347	+	4	0	0	1
Chr1	37835079	37838756	Chr1:37835079|37838756	-	3	0	2	1
Chr1	37857251	37857709	Chr1:37857251|37857709	-	2	0	0	4
Chr1	37864312	37868614	Chr1:37864312|37868614	-	8	11	8	5
Chr1	37865761	37868614	Chr1:37865761|37868614	-	2	5	3	4
Chr1	37866459	37874088	Chr1:37866459|37874088	-	33	65	23	21
Chr1	37872930	37874155	Chr1:37872930|37874155	-	2	5	0	0
Chr1	37889557	37891454	Chr1:37889557|37891454	-	3	0	0	1
Chr1	37976884	37984779	Chr1:37976884|37984779	-	2	5	0	0
Chr1	37980540	37984779	Chr1:37980540|37984779	-	3	0	0	0
Chr1	37980586	37984779	Chr1:37980586|37984779	-	7	0	3	1
Chr1	38102417	38105752	Chr1:38102417|38105752	+	1	0	0	1
Chr1	38237681	38238216	Chr1:38237681|38238216	+	3	0	0	0
Chr1	38756424	38757924	Chr1:38756424|38757924	-	2	0	0	0
Chr1	38964134	38977761	Chr1:38964134|38977761	+	1	0	0	0
Chr1	38998171	39001106	Chr1:38998171|39001106	+	1	10	12	16
Chr1	39025970	39026402	Chr1:39025970|39026402	+	2	0	0	0
Chr1	39028723	39034556	Chr1:39028723|39034556	+	4	0	0	0
Chr1	39083363	39084438	Chr1:39083363|39084438	+	1	0	0	0
Chr1	39119905	39122396	Chr1:39119905|39122396	+	2	0	0	0
Chr1	39119905	39231243	Chr1:39119905|39231243	+	4	0	0	0
Chr1	39121199	39122396	Chr1:39121199|39122396	+	4	0	0	0
Chr1	39231182	39258028	Chr1:39231182|39258028	+	18	6	10	15
Chr1	39282208	39285390	Chr1:39282208|39285390	+	2	0	3	0
Chr1	39309570	39311000	Chr1:39309570|39311000	+	1	6	0	0
Chr1	39309570	39318615	Chr1:39309570|39318615	+	1	0	0	0
Chr1	39327218	39351018	Chr1:39327218|39351018	+	1	0	0	0
Chr1	39340502	39340953	Chr1:39340502|39340953	+	4	8	9	3
Chr1	39350785	39359264	Chr1:39350785|39359264	+	1	3	1	7
Chr1	39360793	39361677	Chr1:39360793|39361677	+	5	2	0	2
Chr1	39370030	39372596	Chr1:39370030|39372596	+	5	0	4	3
Chr1	39379203	39380373	Chr1:39379203|39380373	+	4	0	0	0
Chr1	39380244	39382152	Chr1:39380244|39382152	+	2	0	0	0
Chr1	39385434	39388658	Chr1:39385434|39388658	+	2	0	0	2
Chr1	39422374	39422900	Chr1:39422374|39422900	+	3	4	1	4
Chr1	39444662	39448763	Chr1:39444662|39448763	+	2	0	4	2
Chr1	39447432	39448763	Chr1:39447432|39448763	+	1	0	0	0
Chr1	39451052	39452812	Chr1:39451052|39452812	+	2	0	0	0
Chr1	39451052	39460794	Chr1:39451052|39460794	+	3	0	0	1
Chr1	39451052	39462037	Chr1:39451052|39462037	+	7	4	0	1
Chr1	39452156	39452812	Chr1:39452156|39452812	+	1	0	0	0
Chr1	39453726	39455097	Chr1:39453726|39455097	+	2	0	0	0
Chr1	39459086	39463686	Chr1:39459086|39463686	+	2	0	0	0
Chr1	39529055	39541841	Chr1:39529055|39541841	-	2	0	0	3
Chr1	39541657	39547634	Chr1:39541657|39547634	-	1	0	0	0
Chr1	39561685	39563741	Chr1:39561685|39563741	-	1	0	0	0
Chr1	39740165	39743924	Chr1:39740165|39743924	+	1	0	0	0
Chr1	39740165	39749088	Chr1:39740165|39749088	+	2	0	0	0
Chr1	39740165	39753052	Chr1:39740165|39753052	+	4	11	3	2
Chr1	39748903	39758010	Chr1:39748903|39758010	+	1	0	0	0
Chr1	39763092	39764817	Chr1:39763092|39764817	-	2	5	4	4
Chr1	39804878	39808198	Chr1:39804878|39808198	+	8	7	0	9
Chr1	39804878	39809167	Chr1:39804878|39809167	+	2	0	0	0
Chr1	39804878	39809179	Chr1:39804878|39809179	+	1	0	0	1
Chr1	39804878	39869771	Chr1:39804878|39869771	+	1	0	0	0
Chr1	39841135	39847660	Chr1:39841135|39847660	-	2	0	0	0
Chr1	39841135	39857417	Chr1:39841135|39857417	-	3	0	0	5
Chr1	39844101	39850261	Chr1:39844101|39850261	-	1	0	0	0
Chr1	39847220	39857417	Chr1:39847220|39857417	-	3	0	0	0
Chr1	39850119	39852876	Chr1:39850119|39852876	-	3	0	0	0
Chr1	39850123	39852876	Chr1:39850123|39852876	-	5	0	0	2
Chr1	39851642	39854155	Chr1:39851642|39854155	-	2	0	3	0
Chr1	39851642	39862935	Chr1:39851642|39862935	-	4	0	0	0
Chr1	39852731	39866521	Chr1:39852731|39866521	-	3	0	0	0
Chr1	39853970	39862935	Chr1:39853970|39862935	-	3	11	5	5
Chr1	39957087	39958825	Chr1:39957087|39958825	+	3	0	3	5
Chr1	39957087	39966014	Chr1:39957087|39966014	+	6	0	0	2
Chr1	40059334	40064559	Chr1:40059334|40064559	+	2	0	0	0
Chr1	40078560	40091399	Chr1:40078560|40091399	-	3	4	0	0
Chr1	40089410	40091399	Chr1:40089410|40091399	-	1	0	0	0
Chr1	40089410	40092507	Chr1:40089410|40092507	-	5	0	8	1
Chr1	40189055	40195764	Chr1:40189055|40195764	+	22	22	11	25
Chr1	40189055	40202614	Chr1:40189055|40202614	+	50	79	59	40
Chr1	40189055	40222710	Chr1:40189055|40222710	+	17	14	6	6
Chr1	40190772	40202614	Chr1:40190772|40202614	+	44	24	29	25
Chr1	40190772	40231658	Chr1:40190772|40231658	+	3	0	0	2
Chr1	40260839	40268535	Chr1:40260839|40268535	+	1	0	0	2
Chr1	40267786	40272035	Chr1:40267786|40272035	+	39	21	24	11
Chr1	40267786	40277403	Chr1:40267786|40277403	+	1	0	0	0
Chr1	40307446	40308245	Chr1:40307446|40308245	-	4	0	0	0
Chr1	40403684	40409835	Chr1:40403684|40409835	+	6	0	5	6
Chr1	40406736	40417096	Chr1:40406736|40417096	+	2	9	1	3
Chr1	40413016	40417096	Chr1:40413016|40417096	+	3	7	9	3
Chr1	40479333	40489214	Chr1:40479333|40489214	+	1	0	0	0
Chr1	40514515	40517186	Chr1:40514515|40517186	+	1	1	0	4
Chr1	40641709	40647842	Chr1:40641709|40647842	-	6	5	6	2
Chr1	40738836	40753246	Chr1:40738836|40753246	+	6	4	19	2
Chr1	40738836	40758294	Chr1:40738836|40758294	+	1	3	2	2
Chr1	40747534	40753246	Chr1:40747534|40753246	+	2	0	2	1
Chr1	40834967	40835313	Chr1:40834967|40835313	+	1	0	0	1
Chr1	40979830	40980446	Chr1:40979830|40980446	+	4	0	0	0
Chr1	40983278	40984991	Chr1:40983278|40984991	+	7	6	3	2
Chr1	40983278	40991845	Chr1:40983278|40991845	+	3	3	1	1
Chr1	40983278	40997526	Chr1:40983278|40997526	+	5	1	5	0
Chr1	40983278	41003176	Chr1:40983278|41003176	+	5	0	0	0
Chr1	40983278	41006094	Chr1:40983278|41006094	+	1	0	0	0
Chr1	40983278	41008890	Chr1:40983278|41008890	+	2	0	0	0
Chr1	40995917	40997526	Chr1:40995917|40997526	+	4	8	4	9
Chr1	40997394	41001117	Chr1:40997394|41001117	+	7	2	4	1
Chr1	40997394	41003176	Chr1:40997394|41003176	+	2	0	6	7
Chr1	41006051	41009589	Chr1:41006051|41009589	+	1	0	1	1
Chr1	41006051	41012679	Chr1:41006051|41012679	+	3	0	0	0
Chr1	41008794	41009589	Chr1:41008794|41009589	+	4	0	7	8
Chr1	41008794	41010254	Chr1:41008794|41010254	+	30	7	14	14
Chr1	41009445	41011689	Chr1:41009445|41011689	+	1	0	0	0
Chr1	41009590	41010138	Chr1:41009590|41010138	+	2	0	0	0
Chr1	41033983	41143112	Chr1:41033983|41143112	-	2	0	0	0
Chr1	41046407	41048890	Chr1:41046407|41048890	-	2	16	4	3
Chr1	41048690	41075451	Chr1:41048690|41075451	-	3	0	0	1
Chr1	41070595	41075451	Chr1:41070595|41075451	-	210	299	149	244
Chr1	41070595	41161432	Chr1:41070595|41161432	-	6	0	1	0
Chr1	41105742	41117010	Chr1:41105742|41117010	-	3	7	7	0
Chr1	41105742	41161432	Chr1:41105742|41161432	-	3	0	0	0
Chr1	41113283	41117010	Chr1:41113283|41117010	-	85	36	67	68
Chr1	41113283	41143112	Chr1:41113283|41143112	-	38	87	33	28
Chr1	41113283	41151684	Chr1:41113283|41151684	-	5	2	0	2
Chr1	41113283	41152741	Chr1:41113283|41152741	-	1	7	3	4
Chr1	41113283	41161432	Chr1:41113283|41161432	-	4	10	5	2
Chr1	41113283	41186250	Chr1:41113283|41186250	-	2	5	2	0
Chr1	41142874	41152741	Chr1:41142874|41152741	-	1	0	0	1
Chr1	41142874	41161432	Chr1:41142874|41161432	-	1	0	0	0
Chr1	41142878	41152741	Chr1:41142878|41152741	-	12	14	0	2
Chr1	41142878	41186250	Chr1:41142878|41186250	-	1	9	0	1
Chr1	41186121	41194399	Chr1:41186121|41194399	-	24	11	6	20
Chr1	41863036	41865615	Chr1:41863036|41865615	-	1	0	0	0
Chr1	42194890	42205863	Chr1:42194890|42205863	-	1	0	0	0
Chr1	42194890	42227966	Chr1:42194890|42227966	-	3	0	6	0
Chr1	42205762	42206434	Chr1:42205762|42206434	-	2	0	0	0
Chr1	42227883	42278672	Chr1:42227883|42278672	-	3	4	5	8
Chr1	42227883	42278784	Chr1:42227883|42278784	-	3	0	1	0
Chr1	42227883	42311110	Chr1:42227883|42311110	-	18	23	4	5
Chr1	42227883	42323827	Chr1:42227883|42323827	-	3	16	7	3
Chr1	42265115	42278672	Chr1:42265115|42278672	-	83	92	56	58
Chr1	42265115	42278784	Chr1:42265115|42278784	-	54	66	35	29
Chr1	42265115	42311110	Chr1:42265115|42311110	-	45	76	43	36
Chr1	42265115	42323827	Chr1:42265115|42323827	-	22	15	14	20
Chr1	42278348	42278784	Chr1:42278348|42278784	-	12	5	4	2
Chr1	42278348	42306157	Chr1:42278348|42306157	-	4	0	0	0
Chr1	42278348	42311110	Chr1:42278348|42311110	-	6	15	8	8
Chr1	42278348	42323827	Chr1:42278348|42323827	-	9	6	3	2
Chr1	42311050	42323827	Chr1:42311050|42323827	-	6	0	11	2
Chr1	42473122	42482816	Chr1:42473122|42482816	+	4	0	0	0
Chr1	42589572	42593453	Chr1:42589572|42593453	-	2	0	0	0
Chr1	42609140	42646317	Chr1:42609140|42646317	+	3	0	0	0
Chr1	42658844	42667440	Chr1:42658844|42667440	+	2	0	2	1
Chr1	42664863	42667440	Chr1:42664863|42667440	+	1	9	8	2
Chr1	42762043	42762475	Chr1:42762043|42762475	-	2	0	0	0
Chr1	42773541	42775479	Chr1:42773541|42775479	+	1	0	0	0
Chr1	42773563	42775479	Chr1:42773563|42775479	+	15	27	18	27
Chr1	42773563	42775522	Chr1:42773563|42775522	+	4	10	0	2
Chr1	42773563	42781789	Chr1:42773563|42781789	+	3	0	1	0
Chr1	42841404	42843450	Chr1:42841404|42843450	-	2	0	0	0
Chr1	43197553	43199503	Chr1:43197553|43199503	+	1	3	0	1
Chr1	43403177	43404550	Chr1:43403177|43404550	+	4	0	0	4
Chr1	43432517	43433190	Chr1:43432517|43433190	+	7	0	0	5
Chr1	43451428	43452046	Chr1:43451428|43452046	-	2	0	0	0
Chr1	43553492	43569778	Chr1:43553492|43569778	+	3	2	3	5
Chr1	43553492	43578920	Chr1:43553492|43578920	+	1	10	0	4
Chr1	43553800	43578920	Chr1:43553800|43578920	+	1	0	0	0
Chr1	43588731	43592601	Chr1:43588731|43592601	+	2	2	3	1
Chr1	43653137	43655766	Chr1:43653137|43655766	+	2	0	0	0
Chr1	43653137	43660412	Chr1:43653137|43660412	+	1	6	0	0
Chr1	43653137	43669299	Chr1:43653137|43669299	+	7	0	0	0
Chr1	43665696	43669160	Chr1:43665696|43669160	+	2	0	0	0
Chr1	43671505	43683804	Chr1:43671505|43683804	+	11	3	7	3
Chr1	43694709	43698013	Chr1:43694709|43698013	+	6	0	0	4
Chr1	43792102	43801541	Chr1:43792102|43801541	+	3	0	0	0
Chr1	43792102	43814933	Chr1:43792102|43814933	+	2	0	6	0
Chr1	43801282	43838311	Chr1:43801282|43838311	+	1	0	0	0
Chr1	43824731	43838311	Chr1:43824731|43838311	+	5	2	10	16
Chr1	43838219	43894477	Chr1:43838219|43894477	+	1	0	0	0
Chr1	43858135	43858636	Chr1:43858135|43858636	+	2	0	0	1
Chr1	43898235	43899727	Chr1:43898235|43899727	+	7	1	0	3
Chr1	43920404	43920928	Chr1:43920404|43920928	+	1	0	18	2
Chr1	43956320	43961262	Chr1:43956320|43961262	+	5	0	1	0
Chr1	43975800	43976824	Chr1:43975800|43976824	+	1	0	1	0
Chr1	43976090	43977216	Chr1:43976090|43977216	+	3	0	0	0
Chr1	44213709	44214898	Chr1:44213709|44214898	+	1	0	0	0
Chr1	44214703	44219477	Chr1:44214703|44219477	+	1	0	0	0
Chr1	44220534	44248038	Chr1:44220534|44248038	-	2	0	0	0
Chr1	44241915	44251542	Chr1:44241915|44251542	-	2	0	0	0
Chr1	44241915	44352925	Chr1:44241915|44352925	-	8	0	0	0
Chr1	44247939	44319744	Chr1:44247939|44319744	-	10	9	7	4
Chr1	44247939	44339322	Chr1:44247939|44339322	-	10	55	4	12
Chr1	44247939	44352909	Chr1:44247939|44352909	-	2	0	0	0
Chr1	44247939	44352925	Chr1:44247939|44352925	-	5	6	5	6
Chr1	44284835	44319744	Chr1:44284835|44319744	-	57	58	65	52
Chr1	44284835	44339110	Chr1:44284835|44339110	-	2	3	0	0
Chr1	44284835	44339243	Chr1:44284835|44339243	-	3	0	0	0
Chr1	44284835	44339316	Chr1:44284835|44339316	-	2	5	0	0
Chr1	44284835	44339322	Chr1:44284835|44339322	-	56	85	37	53
Chr1	44284835	44352925	Chr1:44284835|44352925	-	27	3	7	3
Chr1	44308310	44319744	Chr1:44308310|44319744	-	11	12	51	61
Chr1	44308310	44322850	Chr1:44308310|44322850	-	5	0	0	0
Chr1	44308310	44339316	Chr1:44308310|44339316	-	6	2	4	3
Chr1	44308310	44339322	Chr1:44308310|44339322	-	123	170	116	141
Chr1	44308310	44352925	Chr1:44308310|44352925	-	8	9	8	2
Chr1	44313169	44339322	Chr1:44313169|44339322	-	2	2	3	0
Chr1	44319628	44339322	Chr1:44319628|44339322	-	28	8	14	15
Chr1	44319628	44352925	Chr1:44319628|44352925	-	4	0	0	0
Chr1	44339045	44339322	Chr1:44339045|44339322	-	5	12	16	14
Chr1	44411981	44412722	Chr1:44411981|44412722	+	21	18	28	21
Chr1	44411981	44416223	Chr1:44411981|44416223	+	4	5	1	3
Chr1	44689676	44701119	Chr1:44689676|44701119	+	4	0	0	0
Chr1	44689676	44704173	Chr1:44689676|44704173	+	1	0	0	0
Chr1	44707311	44729534	Chr1:44707311|44729534	-	3	0	0	0
Chr1	44721959	44729534	Chr1:44721959|44729534	-	1	7	0	0
Chr1	44750442	44753833	Chr1:44750442|44753833	+	4	2	5	1
Chr1	44755929	44758140	Chr1:44755929|44758140	+	2	0	2	0
Chr1	44757556	44758140	Chr1:44757556|44758140	+	1	4	17	9
Chr1	44757556	44759348	Chr1:44757556|44759348	+	3	0	14	12
Chr1	44757556	44760702	Chr1:44757556|44760702	+	1	3	2	3
Chr1	44776034	44778129	Chr1:44776034|44778129	+	1	9	0	0
Chr1	44776675	44777789	Chr1:44776675|44777789	+	5	0	0	0
Chr1	44874678	44881739	Chr1:44874678|44881739	-	11	12	1	6
Chr1	44874678	44897444	Chr1:44874678|44897444	-	1	21	0	0
Chr1	44879818	44926739	Chr1:44879818|44926739	-	1	0	0	0
Chr1	44881612	44897444	Chr1:44881612|44897444	-	1	0	0	0
Chr1	44913847	44926854	Chr1:44913847|44926854	+	1	0	0	0
Chr1	44926628	44978460	Chr1:44926628|44978460	-	3	0	1	0
Chr1	45041558	45043805	Chr1:45041558|45043805	+	1	0	1	1
Chr1	45051074	45058759	Chr1:45051074|45058759	-	1	0	2	0
Chr1	45087881	45088237	Chr1:45087881|45088237	-	20	11	10	15
Chr1	45330516	45338656	Chr1:45330516|45338656	-	3	0	0	0
Chr1	45334391	45334967	Chr1:45334391|45334967	-	2	0	2	3
Chr1	45421725	45475148	Chr1:45421725|45475148	-	2	0	0	2
Chr1	45457564	45475148	Chr1:45457564|45475148	-	7	0	0	0
Chr1	45507356	45508364	Chr1:45507356|45508364	+	1	0	0	0
Chr1	45514873	45519054	Chr1:45514873|45519054	-	3	0	0	0
Chr1	45550966	45566688	Chr1:45550966|45566688	+	6	0	0	0
Chr1	45561789	45567020	Chr1:45561789|45567020	+	1	0	0	0
Chr1	45566569	45567020	Chr1:45566569|45567020	+	17	9	27	11
Chr1	45591223	45605016	Chr1:45591223|45605016	+	2	0	4	1
Chr1	45614096	45616393	Chr1:45614096|45616393	+	23	42	25	20
Chr1	45615013	45615471	Chr1:45615013|45615471	+	6	0	0	0
Chr1	45615013	45616393	Chr1:45615013|45616393	+	4	29	11	5
Chr1	45628260	45640403	Chr1:45628260|45640403	-	4	2	2	1
Chr1	45628260	45642499	Chr1:45628260|45642499	-	2	0	0	0
Chr1	45628260	45660377	Chr1:45628260|45660377	-	4	2	0	0
Chr1	45630482	45634236	Chr1:45630482|45634236	-	3	8	0	0
Chr1	45630482	45640403	Chr1:45630482|45640403	-	1	7	6	1
Chr1	45630482	45659142	Chr1:45630482|45659142	-	2	4	0	1
Chr1	45633489	45642499	Chr1:45633489|45642499	-	14	1	3	6
Chr1	45634096	45660377	Chr1:45634096|45660377	-	8	1	3	9
Chr1	45640210	45642499	Chr1:45640210|45642499	-	14	31	53	57
Chr1	45640210	45655319	Chr1:45640210|45655319	-	2	4	4	0
Chr1	45642427	45655319	Chr1:45642427|45655319	-	11	0	0	2
Chr1	45654543	45655319	Chr1:45654543|45655319	-	11	9	4	8
Chr1	45659028	45661225	Chr1:45659028|45661225	-	5	12	2	19
Chr1	45714246	45717017	Chr1:45714246|45717017	-	1	0	0	3
Chr1	45714246	45741332	Chr1:45714246|45741332	-	2	0	0	0
Chr1	45727631	45729769	Chr1:45727631|45729769	-	2	0	7	6
Chr1	45727631	45741332	Chr1:45727631|45741332	-	1	0	0	0
Chr1	45740901	45746461	Chr1:45740901|45746461	-	4	0	0	1
Chr1	45746120	45746461	Chr1:45746120|45746461	-	3	0	0	1
Chr1	45824433	45882395	Chr1:45824433|45882395	+	4	0	0	5
Chr1	45824433	45959477	Chr1:45824433|45959477	+	1	0	0	0
Chr1	45882364	45959477	Chr1:45882364|45959477	+	3	0	0	0
Chr1	45913755	45917533	Chr1:45913755|45917533	+	1	4	2	1
Chr1	45913755	45959477	Chr1:45913755|45959477	+	4	6	0	3
Chr1	45959386	45960625	Chr1:45959386|45960625	+	2	5	5	1
Chr1	46045918	46066179	Chr1:46045918|46066179	-	2	0	0	1
Chr1	46055795	46066179	Chr1:46055795|46066179	-	1	0	0	1
Chr1	46055795	46077613	Chr1:46055795|46077613	-	1	1	0	1
Chr1	46055795	46080750	Chr1:46055795|46080750	-	18	60	50	61
Chr1	46061929	46077613	Chr1:46061929|46077613	-	1	0	0	1
Chr1	46077515	46114453	Chr1:46077515|46114453	-	1	0	0	0
Chr1	46077515	46131956	Chr1:46077515|46131956	-	5	2	2	4
Chr1	46190473	46197871	Chr1:46190473|46197871	-	1	0	2	0
Chr1	46258686	46261385	Chr1:46258686|46261385	+	3	0	0	0
Chr1	46279182	46298370	Chr1:46279182|46298370	-	1	6	0	0
Chr1	46280192	46298370	Chr1:46280192|46298370	-	1	1	0	3
Chr1	46285362	46286499	Chr1:46285362|46286499	-	1	0	6	2
Chr1	46309101	46310316	Chr1:46309101|46310316	+	16	11	31	24
Chr1	46346921	46353028	Chr1:46346921|46353028	+	4	0	5	2
Chr1	46402091	46408584	Chr1:46402091|46408584	+	1	0	0	0
Chr1	46408459	46412251	Chr1:46408459|46412251	+	3	8	0	2
Chr1	46562649	46568498	Chr1:46562649|46568498	-	1	0	0	0
Chr1	46562649	46572167	Chr1:46562649|46572167	-	4	5	4	2
Chr1	46632759	46645256	Chr1:46632759|46645256	-	1	1	0	3
Chr1	46643194	46665364	Chr1:46643194|46665364	-	1	0	0	0
Chr1	46663833	46678636	Chr1:46663833|46678636	-	2	0	2	0
Chr1	46683300	46691937	Chr1:46683300|46691937	-	10	0	4	3
Chr1	47260289	47263113	Chr1:47260289|47263113	-	3	5	2	5
Chr1	47260289	47263116	Chr1:47260289|47263116	-	3	1	0	1
Chr1	47260289	47272241	Chr1:47260289|47272241	-	7	14	4	14
Chr1	47262903	47272241	Chr1:47262903|47272241	-	4	5	3	6
Chr1	47262903	47282459	Chr1:47262903|47282459	-	2	0	0	0
Chr1	47269635	47272241	Chr1:47269635|47272241	-	7	15	12	10
Chr1	47280241	47282459	Chr1:47280241|47282459	-	26	25	4	27
Chr1	47280241	47299968	Chr1:47280241|47299968	-	2	0	0	0
Chr1	47281117	47295790	Chr1:47281117|47295790	-	1	0	0	0
Chr1	47281117	47299968	Chr1:47281117|47299968	-	1	0	0	0
Chr1	47287551	47293544	Chr1:47287551|47293544	-	2	0	0	0
Chr1	47287551	47295848	Chr1:47287551|47295848	-	7	5	2	3
Chr1	47287551	47300152	Chr1:47287551|47300152	-	4	33	12	7
Chr1	47287551	47301748	Chr1:47287551|47301748	-	8	3	2	8
Chr1	47289435	47300072	Chr1:47289435|47300072	-	3	0	0	0
Chr1	47289435	47300152	Chr1:47289435|47300152	-	11	5	8	0
Chr1	47295765	47300152	Chr1:47295765|47300152	-	1	4	5	2
Chr1	47295765	47301748	Chr1:47295765|47301748	-	64	56	29	49
Chr1	47295765	47302346	Chr1:47295765|47302346	-	1	0	0	1
Chr1	47295765	47304996	Chr1:47295765|47304996	-	12	19	4	12
Chr1	47299905	47301748	Chr1:47299905|47301748	-	3	1	2	1
Chr1	47301561	47302346	Chr1:47301561|47302346	-	1	0	0	0
Chr1	47301561	47310362	Chr1:47301561|47310362	-	7	3	2	3
Chr1	47310276	47314563	Chr1:47310276|47314563	-	1	0	0	0
Chr1	47363088	47375293	Chr1:47363088|47375293	+	2	0	0	0
Chr1	47363088	47376872	Chr1:47363088|47376872	+	3	0	0	0
Chr1	47367335	47375293	Chr1:47367335|47375293	+	2	0	0	0
Chr1	47368469	47373107	Chr1:47368469|47373107	+	4	5	8	3
Chr1	47368469	47375293	Chr1:47368469|47375293	+	27	29	25	0
Chr1	47791035	47794760	Chr1:47791035|47794760	-	1	0	0	0
Chr1	47794586	47801619	Chr1:47794586|47801619	-	5	0	0	1
Chr1	48298687	48359770	Chr1:48298687|48359770	-	1	0	0	0
Chr1	48355670	48359770	Chr1:48355670|48359770	-	12	13	46	33
Chr1	48355670	48385349	Chr1:48355670|48385349	-	3	0	0	0
Chr1	48355670	48399644	Chr1:48355670|48399644	-	3	0	0	0
Chr1	48355670	48403882	Chr1:48355670|48403882	-	5	0	0	0
Chr1	48385309	48453131	Chr1:48385309|48453131	-	1	0	0	0
Chr1	48395267	48413151	Chr1:48395267|48413151	-	1	2	2	1
Chr1	48395267	48453131	Chr1:48395267|48453131	-	1	0	0	3
Chr1	48411464	48453131	Chr1:48411464|48453131	-	3	0	0	7
Chr1	48447394	48453131	Chr1:48447394|48453131	-	5	0	4	0
Chr1	48736239	48742771	Chr1:48736239|48742771	-	1	0	0	0
Chr1	50475464	50596216	Chr1:50475464|50596216	-	4	0	0	1
Chr1	50490588	50535457	Chr1:50490588|50535457	-	1	7	10	14
Chr1	50490588	50539728	Chr1:50490588|50539728	-	2	8	0	2
Chr1	50490588	50582699	Chr1:50490588|50582699	-	1	0	0	0
Chr1	50490588	50596216	Chr1:50490588|50596216	-	3	6	2	7
Chr1	50535369	50567231	Chr1:50535369|50567231	-	2	12	14	3
Chr1	50535369	50584811	Chr1:50535369|50584811	-	5	18	3	6
Chr1	50535369	50596216	Chr1:50535369|50596216	-	29	80	13	22
Chr1	50535369	50685707	Chr1:50535369|50685707	-	1	0	0	0
Chr1	50539592	50596216	Chr1:50539592|50596216	-	25	81	36	18
Chr1	50567077	50584811	Chr1:50567077|50584811	-	6	6	12	0
Chr1	50567077	50596216	Chr1:50567077|50596216	-	129	182	77	63
Chr1	50582618	50596216	Chr1:50582618|50596216	-	19	9	18	14
Chr1	50582618	50606942	Chr1:50582618|50606942	-	2	0	0	0
Chr1	50655442	50744775	Chr1:50655442|50744775	-	25	32	23	11
Chr1	50655442	50752523	Chr1:50655442|50752523	-	4	2	0	1
Chr1	50655442	50781044	Chr1:50655442|50781044	-	14	3	2	4
Chr1	50655442	50801677	Chr1:50655442|50801677	-	2	0	0	0
Chr1	50705786	50744775	Chr1:50705786|50744775	-	1	10	2	7
Chr1	50705786	50752523	Chr1:50705786|50752523	-	10	8	9	2
Chr1	50705786	50781044	Chr1:50705786|50781044	-	11	5	9	5
Chr1	50705786	50788205	Chr1:50705786|50788205	-	2	0	0	2
Chr1	50705786	50801677	Chr1:50705786|50801677	-	10	6	0	4
Chr1	50738863	50788205	Chr1:50738863|50788205	-	8	7	0	0
Chr1	50738863	50801677	Chr1:50738863|50801677	-	11	3	4	1
Chr1	50738863	50857997	Chr1:50738863|50857997	-	3	0	5	0
Chr1	50738863	50934348	Chr1:50738863|50934348	-	4	0	0	0
Chr1	50744684	50801677	Chr1:50744684|50801677	-	1	0	0	0
Chr1	50780857	50801677	Chr1:50780857|50801677	-	7	14	3	6
Chr1	50787956	50857997	Chr1:50787956|50857997	-	5	0	0	0
Chr1	50788000	50857997	Chr1:50788000|50857997	-	5	13	22	11
Chr1	51236734	51271473	Chr1:51236734|51271473	+	5	0	2	0
Chr1	51251225	51270125	Chr1:51251225|51270125	+	1	0	0	0
Chr1	51265877	51270125	Chr1:51265877|51270125	+	1	0	0	0
Chr1	51265877	51271473	Chr1:51265877|51271473	+	3	0	0	0
Chr1	51269956	51271473	Chr1:51269956|51271473	+	1	5	2	1
Chr1	51296079	51303192	Chr1:51296079|51303192	-	1	0	0	0
Chr1	51301572	51321825	Chr1:51301572|51321825	-	1	0	0	0
Chr1	51315087	51315713	Chr1:51315087|51315713	+	1	0	0	0
Chr1	51321721	51324490	Chr1:51321721|51324490	-	1	0	0	0
Chr1	51394381	51400953	Chr1:51394381|51400953	-	2	7	0	1
Chr1	51394381	51409696	Chr1:51394381|51409696	-	7	6	0	2
Chr1	51394381	51421858	Chr1:51394381|51421858	-	2	11	3	7
Chr1	51394381	51447105	Chr1:51394381|51447105	-	3	13	0	2
Chr1	51394381	51448135	Chr1:51394381|51448135	-	2	5	6	12
Chr1	51400918	51408332	Chr1:51400918|51408332	-	1	0	0	0
Chr1	51402435	51408332	Chr1:51402435|51408332	-	80	108	38	68
Chr1	51402435	51445045	Chr1:51402435|51445045	-	10	22	1	0
Chr1	51402435	51448135	Chr1:51402435|51448135	-	2	3	2	3
Chr1	51402435	51465326	Chr1:51402435|51465326	-	7	0	0	2
Chr1	51403419	51408332	Chr1:51403419|51408332	-	1	4	5	0
Chr1	51405905	51408332	Chr1:51405905|51408332	-	36	32	4	17
Chr1	51409535	51448135	Chr1:51409535|51448135	-	2	0	0	0
Chr1	51421786	51447105	Chr1:51421786|51447105	-	2	5	0	0
Chr1	51421786	51448135	Chr1:51421786|51448135	-	3	6	4	4
Chr1	51440347	51447105	Chr1:51440347|51447105	-	8	1	0	0
Chr1	51440347	51448135	Chr1:51440347|51448135	-	1	14	1	1
Chr1	51440347	51465326	Chr1:51440347|51465326	-	1	0	0	0
Chr1	51444889	51465326	Chr1:51444889|51465326	-	1	0	0	0
Chr1	51447935	51461150	Chr1:51447935|51461150	-	1	0	0	0
Chr1	51459041	51465326	Chr1:51459041|51465326	-	12	8	2	2
Chr1	51461091	51472948	Chr1:51461091|51472948	-	5	0	0	1
Chr1	51461091	51481314	Chr1:51461091|51481314	-	10	11	14	4
Chr1	51669434	51670390	Chr1:51669434|51670390	+	3	0	0	0
Chr1	51714003	51772723	Chr1:51714003|51772723	+	1	0	0	1
Chr1	51745536	51761971	Chr1:51745536|51761971	+	6	0	4	0
Chr1	51745536	51765981	Chr1:51745536|51765981	+	14	7	10	7
Chr1	51745536	51772723	Chr1:51745536|51772723	+	4	0	0	8
Chr1	51746710	51772182	Chr1:51746710|51772182	+	1	0	0	1
Chr1	51748369	51765981	Chr1:51748369|51765981	+	15	3	1	7
Chr1	51748369	51772182	Chr1:51748369|51772182	+	1	1	1	3
Chr1	51750145	51765981	Chr1:51750145|51765981	+	11	8	2	10
Chr1	51750145	51772182	Chr1:51750145|51772182	+	4	2	0	1
Chr1	51750145	51772723	Chr1:51750145|51772723	+	3	3	0	0
Chr1	51756320	51765981	Chr1:51756320|51765981	+	3	0	0	0
Chr1	51756320	51776918	Chr1:51756320|51776918	+	2	0	0	0
Chr1	51760690	51765981	Chr1:51760690|51765981	+	4	1	1	4
Chr1	51760690	51782643	Chr1:51760690|51782643	+	1	9	2	0
Chr1	51772070	51772723	Chr1:51772070|51772723	+	2	12	3	3
Chr1	51772070	51782643	Chr1:51772070|51782643	+	8	0	5	0
Chr1	51803814	51809401	Chr1:51803814|51809401	-	2	3	0	0
Chr1	51803814	51834170	Chr1:51803814|51834170	-	1	3	0	0
Chr1	51810281	51814813	Chr1:51810281|51814813	-	5	2	0	0
Chr1	51814035	51823786	Chr1:51814035|51823786	-	3	0	0	0
Chr1	51814035	51834170	Chr1:51814035|51834170	-	6	2	5	8
Chr1	51818066	51834170	Chr1:51818066|51834170	-	1	0	0	5
Chr1	51819800	51834170	Chr1:51819800|51834170	-	4	4	3	1
Chr1	51823664	51834170	Chr1:51823664|51834170	-	38	14	23	24
Chr1	51836131	51840514	Chr1:51836131|51840514	-	1	0	0	1
Chr1	51933318	51977117	Chr1:51933318|51977117	-	1	0	0	0
Chr1	52023491	52028630	Chr1:52023491|52028630	-	1	0	3	2
Chr1	52083340	52086853	Chr1:52083340|52086853	+	3	0	0	0
Chr1	52199251	52233276	Chr1:52199251|52233276	+	3	0	0	0
Chr1	52233171	52239595	Chr1:52233171|52239595	+	10	9	0	4
Chr1	52263773	52268632	Chr1:52263773|52268632	+	3	1	0	1
Chr1	52263773	52281816	Chr1:52263773|52281816	+	1	0	2	3
Chr1	52281661	52303925	Chr1:52281661|52303925	+	1	3	2	3
Chr1	52293453	52303925	Chr1:52293453|52303925	+	8	0	4	3
Chr1	52381642	52389321	Chr1:52381642|52389321	-	3	0	3	0
Chr1	52383420	52385949	Chr1:52383420|52385949	-	3	0	0	0
Chr1	52384604	52393530	Chr1:52384604|52393530	-	1	0	0	0
Chr1	52385161	52388637	Chr1:52385161|52388637	-	1	0	0	0
Chr1	52396046	52397863	Chr1:52396046|52397863	-	6	9	12	11
Chr1	52404681	52413991	Chr1:52404681|52413991	+	1	0	0	0
Chr1	52413879	52415386	Chr1:52413879|52415386	+	1	0	0	0
Chr1	52431013	52435465	Chr1:52431013|52435465	-	1	0	1	0
Chr1	52436755	52461769	Chr1:52436755|52461769	-	3	4	0	1
Chr1	52438220	52461769	Chr1:52438220|52461769	-	9	4	2	8
Chr1	52438220	52481842	Chr1:52438220|52481842	-	1	0	0	0
Chr1	52445787	52461769	Chr1:52445787|52461769	-	16	5	7	6
Chr1	52445787	52526373	Chr1:52445787|52526373	-	1	0	0	0
Chr1	52465070	52490801	Chr1:52465070|52490801	-	5	0	0	0
Chr1	52477708	52481923	Chr1:52477708|52481923	-	18	28	19	6
Chr1	52477708	52493662	Chr1:52477708|52493662	-	1	10	2	0
Chr1	52477708	52497183	Chr1:52477708|52497183	-	1	0	0	0
Chr1	52481423	52489035	Chr1:52481423|52489035	-	1	0	1	1
Chr1	52481804	52509712	Chr1:52481804|52509712	-	1	0	2	1
Chr1	52488909	52493662	Chr1:52488909|52493662	-	3	0	0	0
Chr1	52488909	52497183	Chr1:52488909|52497183	-	9	13	8	9
Chr1	52488909	52509712	Chr1:52488909|52509712	-	1	2	1	3
Chr1	52490732	52497183	Chr1:52490732|52497183	-	1	6	0	4
Chr1	52490732	52509712	Chr1:52490732|52509712	-	7	4	13	5
Chr1	52493611	52497183	Chr1:52493611|52497183	-	13	0	18	24
Chr1	52493611	52509712	Chr1:52493611|52509712	-	132	160	94	110
Chr1	52495427	52509712	Chr1:52495427|52509712	-	2	8	6	1
Chr1	52509596	52516054	Chr1:52509596|52516054	-	1	0	0	0
Chr1	52509596	52526373	Chr1:52509596|52526373	-	7	28	1	17
Chr1	52515891	52526373	Chr1:52515891|52526373	-	22	37	10	24
Chr1	52515891	52529873	Chr1:52515891|52529873	-	1	0	0	0
Chr1	52525563	52526373	Chr1:52525563|52526373	-	3	0	0	1
Chr1	52771020	52779993	Chr1:52771020|52779993	+	2	0	0	6
Chr1	52779853	52790067	Chr1:52779853|52790067	+	4	5	0	3
Chr1	52779853	52796784	Chr1:52779853|52796784	+	2	6	3	0
Chr1	52779853	52802139	Chr1:52779853|52802139	+	1	0	0	0
Chr1	52784877	52796784	Chr1:52784877|52796784	+	1	0	0	0
Chr1	52813536	52816629	Chr1:52813536|52816629	+	4	0	2	0
Chr1	52854465	52867777	Chr1:52854465|52867777	+	5	0	1	1
Chr1	52856998	52860871	Chr1:52856998|52860871	+	9	11	7	9
Chr1	52856998	52864157	Chr1:52856998|52864157	+	5	24	5	10
Chr1	52857579	52887053	Chr1:52857579|52887053	+	7	0	0	4
Chr1	52860731	52867777	Chr1:52860731|52867777	+	14	19	16	14
Chr1	52860731	52877901	Chr1:52860731|52877901	+	1	0	2	2
Chr1	52860731	52887053	Chr1:52860731|52887053	+	4	0	0	3
Chr1	52860731	52892975	Chr1:52860731|52892975	+	4	0	2	5
Chr1	52877682	52881665	Chr1:52877682|52881665	+	1	4	2	1
Chr1	52877682	52887053	Chr1:52877682|52887053	+	2	9	0	4
Chr1	52877682	52892975	Chr1:52877682|52892975	+	12	17	12	11
Chr1	52885833	52892975	Chr1:52885833|52892975	+	9	8	16	8
Chr1	52886956	52892975	Chr1:52886956|52892975	+	12	10	7	18
Chr1	52896356	52899224	Chr1:52896356|52899224	-	3	2	1	0
Chr1	52896356	52914095	Chr1:52896356|52914095	-	4	17	0	0
Chr1	52941796	52961629	Chr1:52941796|52961629	+	12	0	4	5
Chr1	52954740	52978367	Chr1:52954740|52978367	+	1	0	0	0
Chr1	52974769	52976769	Chr1:52974769|52976769	+	4	0	0	0
Chr1	52974769	52978367	Chr1:52974769|52978367	+	2	0	2	0
Chr1	52974769	52980543	Chr1:52974769|52980543	+	1	0	0	0
Chr1	52974769	52988136	Chr1:52974769|52988136	+	1	5	0	3
Chr1	52978217	52988136	Chr1:52978217|52988136	+	1	6	1	1
Chr1	53014890	53039046	Chr1:53014890|53039046	+	8	0	1	3
Chr1	53038917	53040256	Chr1:53038917|53040256	+	3	0	0	0
Chr1	53210035	53210409	Chr1:53210035|53210409	-	2	5	0	0
Chr1	53289567	53292303	Chr1:53289567|53292303	-	1	0	0	0
Chr1	53594108	53600278	Chr1:53594108|53600278	-	1	16	0	7
Chr1	53772329	53789196	Chr1:53772329|53789196	-	7	0	4	6
Chr1	53787158	53789196	Chr1:53787158|53789196	-	3	0	0	0
Chr1	53787158	53797144	Chr1:53787158|53797144	-	8	0	0	0
Chr1	53787158	53807791	Chr1:53787158|53807791	-	2	0	0	0
Chr1	53787158	53809746	Chr1:53787158|53809746	-	5	2	0	0
Chr1	53787158	53832591	Chr1:53787158|53832591	-	3	9	3	3
Chr1	53789133	53800848	Chr1:53789133|53800848	-	5	0	0	0
Chr1	53791688	53797144	Chr1:53791688|53797144	-	2	0	0	0
Chr1	53793229	53797144	Chr1:53793229|53797144	-	1	0	6	0
Chr1	53793229	53800848	Chr1:53793229|53800848	-	6	4	0	1
Chr1	53793229	53835620	Chr1:53793229|53835620	-	1	8	0	2
Chr1	53796689	53797144	Chr1:53796689|53797144	-	7	0	0	0
Chr1	53800693	53806517	Chr1:53800693|53806517	-	2	0	4	3
Chr1	53800693	53809746	Chr1:53800693|53809746	-	4	1	1	2
Chr1	53800693	53832591	Chr1:53800693|53832591	-	8	25	9	23
Chr1	53800693	53835620	Chr1:53800693|53835620	-	4	1	0	4
Chr1	53803928	53809746	Chr1:53803928|53809746	-	4	1	3	2
Chr1	53803928	53832591	Chr1:53803928|53832591	-	15	5	3	7
Chr1	53803928	53835620	Chr1:53803928|53835620	-	3	5	0	0
Chr1	53806425	53828173	Chr1:53806425|53828173	-	2	0	0	0
Chr1	53807656	53832591	Chr1:53807656|53832591	-	4	8	6	0
Chr1	53809695	53832591	Chr1:53809695|53832591	-	3	0	0	0
Chr1	53818971	53828173	Chr1:53818971|53828173	-	2	0	0	1
Chr1	53818971	53832591	Chr1:53818971|53832591	-	4	3	4	6
Chr1	53825798	53828173	Chr1:53825798|53828173	-	2	0	1	0
Chr1	53825798	53832591	Chr1:53825798|53832591	-	6	13	16	2
Chr1	53825798	53835620	Chr1:53825798|53835620	-	7	1	6	4
Chr1	53923904	53940097	Chr1:53923904|53940097	-	5	2	10	8
Chr1	53939985	53949672	Chr1:53939985|53949672	-	1	0	0	0
Chr1	54036610	54047372	Chr1:54036610|54047372	-	1	3	2	0
Chr1	54040756	54043525	Chr1:54040756|54043525	-	21	10	15	13
Chr1	54040756	54047372	Chr1:54040756|54047372	-	9	8	4	10
Chr1	54184161	54195715	Chr1:54184161|54195715	-	1	0	0	0
Chr1	54205018	54205410	Chr1:54205018|54205410	+	4	0	2	0
Chr1	54205018	54210131	Chr1:54205018|54210131	+	1	0	0	1
Chr1	54205018	54212658	Chr1:54205018|54212658	+	2	4	1	0
Chr1	54209946	54216344	Chr1:54209946|54216344	+	1	2	0	0
Chr1	54584655	54585904	Chr1:54584655|54585904	+	1	0	0	0
Chr1	54651949	54673186	Chr1:54651949|54673186	+	2	0	0	1
Chr1	54665167	54674151	Chr1:54665167|54674151	+	1	0	0	0
Chr1	54716600	54722799	Chr1:54716600|54722799	+	1	2	0	1
Chr1	54718434	54728432	Chr1:54718434|54728432	+	3	0	0	0
Chr1	54721163	54731700	Chr1:54721163|54731700	+	3	0	0	2
Chr1	55089627	55094087	Chr1:55089627|55094087	-	1	0	1	3
Chr1	55093937	55095396	Chr1:55093937|55095396	-	2	0	0	0
Chr1	55097020	55098531	Chr1:55097020|55098531	-	2	0	0	0
Chr1	55097598	55124628	Chr1:55097598|55124628	-	2	0	0	0
Chr1	55123447	55134413	Chr1:55123447|55134413	-	1	0	1	0
Chr1	55145998	55148570	Chr1:55145998|55148570	-	1	0	0	0
Chr1	55171556	55178132	Chr1:55171556|55178132	-	3	0	1	0
Chr1	56511976	56537112	Chr1:56511976|56537112	-	3	8	4	6
Chr1	56523823	56537112	Chr1:56523823|56537112	-	1	0	0	0
Chr1	56692358	56696159	Chr1:56692358|56696159	+	2	0	0	0
Chr1	56693765	56706218	Chr1:56693765|56706218	+	2	0	0	0
Chr1	57062884	57072414	Chr1:57062884|57072414	-	1	0	0	4
Chr1	58506060	58530689	Chr1:58506060|58530689	-	1	0	0	0
Chr1	58506060	58533975	Chr1:58506060|58533975	-	5	12	11	7
Chr1	58506060	58534331	Chr1:58506060|58534331	-	11	11	4	3
Chr1	58506060	58536595	Chr1:58506060|58536595	-	1	0	0	0
Chr1	58506060	58536741	Chr1:58506060|58536741	-	72	178	92	55
Chr1	58527261	58536741	Chr1:58527261|58536741	-	18	35	13	10
Chr1	58530597	58539306	Chr1:58530597|58539306	-	6	0	0	0
Chr1	58534158	58536741	Chr1:58534158|58536741	-	1	0	0	0
Chr1	58536509	58539306	Chr1:58536509|58539306	-	4	6	5	2
Chr1	58661170	58685251	Chr1:58661170|58685251	-	3	3	0	0
Chr1	58665499	58667921	Chr1:58665499|58667921	-	2	0	0	0
Chr1	58671870	58685251	Chr1:58671870|58685251	-	13	17	9	16
Chr1	58671870	58695207	Chr1:58671870|58695207	-	2	0	0	0
Chr1	58673573	58677056	Chr1:58673573|58677056	-	4	1	1	0
Chr1	58673573	58690249	Chr1:58673573|58690249	-	2	4	0	0
Chr1	58681785	58682545	Chr1:58681785|58682545	-	3	5	4	4
Chr1	58681785	58685251	Chr1:58681785|58685251	-	6	5	6	4
Chr1	58685153	58695207	Chr1:58685153|58695207	-	6	3	4	0
Chr1	58939614	59020623	Chr1:58939614|59020623	+	3	0	0	0
Chr1	59316146	59378837	Chr1:59316146|59378837	+	6	1	0	0
Chr1	59321536	59332032	Chr1:59321536|59332032	+	6	4	5	1
Chr1	59321536	59346398	Chr1:59321536|59346398	+	33	48	29	53
Chr1	59321536	59357498	Chr1:59321536|59357498	+	1	0	0	0
Chr1	59321536	59378837	Chr1:59321536|59378837	+	26	31	24	31
Chr1	59321536	59411367	Chr1:59321536|59411367	+	4	0	0	1
Chr1	59321536	59457076	Chr1:59321536|59457076	+	10	2	7	3
Chr1	59321536	59474202	Chr1:59321536|59474202	+	1	0	0	0
Chr1	59321536	59512439	Chr1:59321536|59512439	+	2	6	0	1
Chr1	59339958	59346398	Chr1:59339958|59346398	+	17	1	4	10
Chr1	59339958	59378837	Chr1:59339958|59378837	+	23	27	16	30
Chr1	59660219	59674133	Chr1:59660219|59674133	+	1	0	0	0
Chr1	59821858	59843598	Chr1:59821858|59843598	+	1	0	0	1
Chr1	59821858	59849183	Chr1:59821858|59849183	+	1	0	0	0
Chr1	59828780	59843598	Chr1:59828780|59843598	+	2	3	0	1
Chr1	59828780	59849183	Chr1:59828780|59849183	+	1	0	0	0
Chr1	59907786	59916100	Chr1:59907786|59916100	-	2	5	0	0
Chr1	60540249	60542411	Chr1:60540249|60542411	-	1	0	1	0
Chr1	61088149	61112343	Chr1:61088149|61112343	+	15	9	13	2
Chr1	61109778	61159155	Chr1:61109778|61159155	+	2	0	0	0
Chr1	61109778	61186527	Chr1:61109778|61186527	+	3	0	0	0
Chr1	61111371	61159155	Chr1:61111371|61159155	+	3	8	10	2
Chr1	61152172	61277585	Chr1:61152172|61277585	+	2	0	0	0
Chr1	61158875	61160583	Chr1:61158875|61160583	+	2	0	0	0
Chr1	61277520	61359274	Chr1:61277520|61359274	+	20	7	6	2
Chr1	61310173	61314891	Chr1:61310173|61314891	+	2	0	0	0
Chr1	61332512	61359274	Chr1:61332512|61359274	+	7	0	1	4
Chr1	61352450	61359274	Chr1:61352450|61359274	+	4	0	0	0
Chr1	61352450	61383365	Chr1:61352450|61383365	+	1	0	2	1
Chr1	61683417	61701025	Chr1:61683417|61701025	-	1	0	0	1
Chr1	61686792	61723772	Chr1:61686792|61723772	-	3	0	0	0
Chr1	61694697	61696534	Chr1:61694697|61696534	-	1	6	5	11
Chr1	61762858	61766473	Chr1:61762858|61766473	+	5	5	4	2
Chr1	61762858	61775334	Chr1:61762858|61775334	+	3	23	3	8
Chr1	61762858	61805524	Chr1:61762858|61805524	+	5	0	0	0
Chr1	61766279	61797428	Chr1:61766279|61797428	+	1	0	0	0
Chr1	61787754	61805524	Chr1:61787754|61805524	+	2	0	0	0
Chr1	61797287	61805524	Chr1:61797287|61805524	+	1	0	1	4
Chr1	61797287	61808530	Chr1:61797287|61808530	+	6	1	2	0
Chr1	61805448	61827583	Chr1:61805448|61827583	+	1	0	0	0
Chr1	61822945	61833785	Chr1:61822945|61833785	+	1	0	0	1
Chr1	61827422	61901459	Chr1:61827422|61901459	+	1	0	0	1
Chr1	61827422	61927829	Chr1:61827422|61927829	+	1	0	0	1
Chr1	61856030	61875366	Chr1:61856030|61875366	+	1	1	1	5
Chr1	61856030	61884408	Chr1:61856030|61884408	+	5	4	0	6
Chr1	61856030	61901459	Chr1:61856030|61901459	+	1	0	0	0
Chr1	61856030	61927829	Chr1:61856030|61927829	+	1	0	0	2
Chr1	61899583	61901459	Chr1:61899583|61901459	+	6	2	14	16
Chr1	61899583	61914664	Chr1:61899583|61914664	+	4	6	2	2
Chr1	61899583	61927829	Chr1:61899583|61927829	+	5	1	5	1
Chr1	61914587	61990364	Chr1:61914587|61990364	+	1	0	0	0
Chr1	61914587	62038049	Chr1:61914587|62038049	+	2	0	0	0
Chr1	61927730	62051058	Chr1:61927730|62051058	+	4	0	0	0
Chr1	61972926	62017947	Chr1:61972926|62017947	+	3	0	0	0
Chr1	61990168	62017947	Chr1:61990168|62017947	+	12	8	3	3
Chr1	61990168	62051058	Chr1:61990168|62051058	+	6	0	0	2
Chr1	62007266	62017947	Chr1:62007266|62017947	+	1	0	0	3
Chr1	62013343	62051058	Chr1:62013343|62051058	+	2	7	0	1
Chr1	62017856	62079567	Chr1:62017856|62079567	+	2	0	0	0
Chr1	62037977	62084648	Chr1:62037977|62084648	+	3	0	0	0
Chr1	62114053	62123058	Chr1:62114053|62123058	+	1	0	0	1
Chr1	62121181	62153481	Chr1:62121181|62153481	+	2	3	0	0
Chr1	62439799	62442299	Chr1:62439799|62442299	+	9	36	9	15
Chr1	62439799	62443319	Chr1:62439799|62443319	+	25	8	9	4
Chr1	62441488	62443319	Chr1:62441488|62443319	+	33	25	17	16
Chr1	62441488	62448666	Chr1:62441488|62448666	+	2	0	0	0
Chr1	62442257	62448666	Chr1:62442257|62448666	+	4	0	0	0
Chr1	62443159	62447511	Chr1:62443159|62447511	+	7	2	7	11
Chr1	62443159	62448666	Chr1:62443159|62448666	+	1	0	2	2
Chr1	62444738	62448666	Chr1:62444738|62448666	+	2	2	0	2
Chr1	62447341	62448666	Chr1:62447341|62448666	+	15	12	4	6
Chr1	62447341	62450487	Chr1:62447341|62450487	+	3	2	6	1
Chr1	62473982	62496497	Chr1:62473982|62496497	-	3	0	0	0
Chr1	62473982	62663130	Chr1:62473982|62663130	-	1	0	0	0
Chr1	62495581	62508058	Chr1:62495581|62508058	-	2	3	0	2
Chr1	62504630	62513898	Chr1:62504630|62513898	-	3	15	0	0
Chr1	62535493	62539892	Chr1:62535493|62539892	-	3	0	0	0
Chr1	62537891	62552901	Chr1:62537891|62552901	-	4	0	0	1
Chr1	62577262	62586624	Chr1:62577262|62586624	-	18	6	9	12
Chr1	62577262	62625401	Chr1:62577262|62625401	-	3	0	4	9
Chr1	62583184	62619993	Chr1:62583184|62619993	-	3	0	0	0
Chr1	62618706	62633578	Chr1:62618706|62633578	-	1	0	0	1
Chr1	62631240	62636603	Chr1:62631240|62636603	-	3	0	0	1
Chr1	62631240	62663130	Chr1:62631240|62663130	-	3	4	1	2
Chr1	62653725	62663130	Chr1:62653725|62663130	-	3	0	0	1
Chr1	62653725	62686113	Chr1:62653725|62686113	-	1	0	0	0
Chr1	62803719	62810586	Chr1:62803719|62810586	+	10	0	0	2
Chr1	62803719	62821209	Chr1:62803719|62821209	+	14	9	4	14
Chr1	62803719	62834852	Chr1:62803719|62834852	+	2	2	0	1
Chr1	62803719	62841547	Chr1:62803719|62841547	+	5	18	2	6
Chr1	62803723	62841547	Chr1:62803723|62841547	+	2	0	0	1
Chr1	62816575	62821209	Chr1:62816575|62821209	+	1	8	1	0
Chr1	62816575	62837531	Chr1:62816575|62837531	+	2	0	0	0
Chr1	62816575	62841547	Chr1:62816575|62841547	+	2	0	0	2
Chr1	62829040	62841547	Chr1:62829040|62841547	+	5	3	3	14
Chr1	63411682	63428801	Chr1:63411682|63428801	+	1	0	0	0
Chr1	63411682	63429126	Chr1:63411682|63429126	+	3	0	0	0
Chr1	63411926	63415957	Chr1:63411926|63415957	+	1	0	1	4
Chr1	63411926	63419440	Chr1:63411926|63419440	+	13	12	7	6
Chr1	63411926	63436915	Chr1:63411926|63436915	+	3	0	0	0
Chr1	63440980	63490218	Chr1:63440980|63490218	-	2	0	0	3
Chr1	63446806	63490218	Chr1:63446806|63490218	-	1	0	0	0
Chr1	63453918	63490218	Chr1:63453918|63490218	-	1	0	0	0
Chr1	63477415	63490218	Chr1:63477415|63490218	-	1	0	0	0
Chr1	63478764	63490218	Chr1:63478764|63490218	-	8	12	4	8
Chr1	63478764	63508570	Chr1:63478764|63508570	-	44	70	0	22
Chr1	63478764	63510181	Chr1:63478764|63510181	-	5	2	0	4
Chr1	63525572	63534216	Chr1:63525572|63534216	+	2	0	0	1
Chr1	63545916	63551215	Chr1:63545916|63551215	+	7	0	0	0
Chr1	63545916	63555515	Chr1:63545916|63555515	+	1	0	0	0
Chr1	63727736	63772774	Chr1:63727736|63772774	+	1	0	0	0
Chr1	63788933	63789327	Chr1:63788933|63789327	+	1	0	0	0
Chr1	64009305	64050716	Chr1:64009305|64050716	+	23	12	5	9
Chr1	64049691	64050716	Chr1:64049691|64050716	+	31	56	18	39
Chr1	64550594	64582304	Chr1:64550594|64582304	+	3	0	0	2
Chr1	64550594	64602912	Chr1:64550594|64602912	+	3	4	2	0
Chr1	64582156	64602912	Chr1:64582156|64602912	+	3	2	5	7
Chr1	64602806	64641969	Chr1:64602806|64641969	+	6	10	3	2
Chr1	64613488	64641969	Chr1:64613488|64641969	+	2	4	0	0
Chr1	64629355	64641969	Chr1:64629355|64641969	+	7	16	5	17
Chr1	64641820	64648034	Chr1:64641820|64648034	+	1	0	0	0
Chr1	64641820	64654803	Chr1:64641820|64654803	+	2	2	0	0
Chr1	64658705	64675983	Chr1:64658705|64675983	+	1	0	0	0
Chr1	64658970	64659991	Chr1:64658970|64659991	-	3	0	0	0
Chr1	64664498	64675983	Chr1:64664498|64675983	+	1	0	0	0
Chr1	64666057	64675983	Chr1:64666057|64675983	+	9	21	8	17
Chr1	64673348	64675561	Chr1:64673348|64675561	+	2	3	2	2
Chr1	64673348	64675983	Chr1:64673348|64675983	+	9	3	4	0
Chr1	64768656	64781571	Chr1:64768656|64781571	+	1	3	2	2
Chr1	64768656	64789514	Chr1:64768656|64789514	+	26	40	13	32
Chr1	64777623	64778092	Chr1:64777623|64778092	+	6	4	0	2
Chr1	64777623	64781571	Chr1:64777623|64781571	+	6	19	4	11
Chr1	64777623	64789514	Chr1:64777623|64789514	+	17	64	17	24
Chr1	64777623	64814840	Chr1:64777623|64814840	+	5	8	1	7
Chr1	64802976	64814840	Chr1:64802976|64814840	+	16	23	11	4
Chr1	64804773	64814840	Chr1:64804773|64814840	+	2	0	0	0
Chr1	64812738	64814840	Chr1:64812738|64814840	+	6	1	2	5
Chr1	64974575	64995088	Chr1:64974575|64995088	-	2	0	0	0
Chr1	64979563	64995088	Chr1:64979563|64995088	-	8	2	3	6
Chr1	64989435	64993581	Chr1:64989435|64993581	-	6	3	3	2
Chr1	64989435	64995088	Chr1:64989435|64995088	-	18	17	20	10
Chr1	65364635	65366196	Chr1:65364635|65366196	+	143	118	149	153
Chr1	65364635	65401880	Chr1:65364635|65401880	+	1	0	0	0
Chr1	65913245	65918835	Chr1:65913245|65918835	+	47	18	18	65
Chr1	65913245	65937709	Chr1:65913245|65937709	+	2	0	0	0
Chr1	66247460	66266087	Chr1:66247460|66266087	+	3	0	0	0
Chr1	66833585	66905375	Chr1:66833585|66905375	-	1	0	0	1
Chr1	66842691	66842937	Chr1:66842691|66842937	-	4	0	0	0
Chr1	66871370	66905375	Chr1:66871370|66905375	-	2	0	0	0
Chr1	66891154	66905375	Chr1:66891154|66905375	-	49	78	30	59
Chr1	66928929	66958220	Chr1:66928929|66958220	+	5	0	0	0
Chr1	66940028	66958983	Chr1:66940028|66958983	+	4	0	0	1
Chr1	66940028	66959743	Chr1:66940028|66959743	+	4	0	0	1
Chr1	66940028	66963160	Chr1:66940028|66963160	+	14	30	9	15
Chr1	66940028	66976722	Chr1:66940028|66976722	+	2	0	0	0
Chr1	66946150	66949159	Chr1:66946150|66949159	+	4	0	0	0
Chr1	66946150	66959743	Chr1:66946150|66959743	+	2	5	2	7
Chr1	66946150	66963160	Chr1:66946150|66963160	+	7	19	8	12
Chr1	66958059	66963160	Chr1:66958059|66963160	+	7	36	51	33
Chr1	66963088	66976722	Chr1:66963088|66976722	+	2	5	0	0
Chr1	67020369	67052989	Chr1:67020369|67052989	-	2	0	0	3
Chr1	67359462	67359851	Chr1:67359462|67359851	-	2	0	0	0
Chr1	67395405	67399903	Chr1:67395405|67399903	-	4	5	5	7
Chr1	67395405	67399906	Chr1:67395405|67399906	-	17	10	3	9
Chr1	67395405	67402417	Chr1:67395405|67402417	-	16	6	8	5
Chr1	67395405	67405828	Chr1:67395405|67405828	-	5	6	3	2
Chr1	67398605	67402417	Chr1:67398605|67402417	-	1	4	0	3
Chr1	67398605	67405061	Chr1:67398605|67405061	-	4	0	0	0
Chr1	67398605	67405768	Chr1:67398605|67405768	-	1	0	0	1
Chr1	67398605	67405828	Chr1:67398605|67405828	-	2	0	0	0
Chr1	68125798	68126335	Chr1:68125798|68126335	-	9	3	0	3
Chr1	68137780	68159247	Chr1:68137780|68159247	-	1	0	4	2
Chr1	68137780	68194227	Chr1:68137780|68194227	-	1	0	0	0
Chr1	68150188	68159247	Chr1:68150188|68159247	-	2	9	0	1
Chr1	68153517	68159247	Chr1:68153517|68159247	-	2	3	0	1
Chr1	68153517	68186649	Chr1:68153517|68186649	-	5	7	0	1
Chr1	68186540	68194227	Chr1:68186540|68194227	-	3	3	2	6
Chr1	68943849	69013627	Chr1:68943849|69013627	+	5	0	0	0
Chr1	69638717	69678478	Chr1:69638717|69678478	+	2	4	4	6
Chr1	69678381	69792160	Chr1:69678381|69792160	+	1	0	0	0
Chr1	69760191	69792160	Chr1:69760191|69792160	+	2	0	0	1
Chr1	69931507	69994633	Chr1:69931507|69994633	+	3	3	1	6
Chr1	69980379	69994633	Chr1:69980379|69994633	+	1	0	0	2
Chr1	70043954	70089819	Chr1:70043954|70089819	+	6	9	2	7
Chr1	70043954	70121870	Chr1:70043954|70121870	+	1	0	0	0
Chr1	70053026	70089819	Chr1:70053026|70089819	+	2	1	1	1
Chr1	70148052	70148433	Chr1:70148052|70148433	-	1	0	0	0
Chr1	70148487	70152543	Chr1:70148487|70152543	-	1	0	0	0
Chr1	70148487	70175870	Chr1:70148487|70175870	-	1	0	0	0
Chr1	70173465	70189273	Chr1:70173465|70189273	-	9	10	9	11
Chr1	70181086	70189273	Chr1:70181086|70189273	-	1	0	0	0
Chr1	70184785	70189273	Chr1:70184785|70189273	-	3	13	4	4
Chr1	70221612	70228555	Chr1:70221612|70228555	+	4	0	1	0
Chr1	70221615	70228555	Chr1:70221615|70228555	+	1	3	1	3
Chr1	70221615	70239520	Chr1:70221615|70239520	+	4	5	1	3
Chr1	70228422	70232377	Chr1:70228422|70232377	+	2	0	1	0
Chr1	70228422	70237552	Chr1:70228422|70237552	+	3	6	9	7
Chr1	70228422	70239520	Chr1:70228422|70239520	+	8	2	2	7
Chr1	70231864	70246907	Chr1:70231864|70246907	+	1	0	0	0
Chr1	70232268	70234788	Chr1:70232268|70234788	+	1	0	0	0
Chr1	70232268	70239520	Chr1:70232268|70239520	+	1	0	0	0
Chr1	70270856	70293620	Chr1:70270856|70293620	-	1	0	0	0
Chr1	70270856	70300908	Chr1:70270856|70300908	-	2	0	0	2
Chr1	70270856	70315566	Chr1:70270856|70315566	-	11	3	4	4
Chr1	70274720	70315566	Chr1:70274720|70315566	-	1	0	0	4
Chr1	70276765	70300908	Chr1:70276765|70300908	-	2	0	0	0
Chr1	70276765	70315566	Chr1:70276765|70315566	-	2	0	0	1
Chr1	70292388	70300908	Chr1:70292388|70300908	-	29	13	6	11
Chr1	70292388	70306290	Chr1:70292388|70306290	-	22	21	13	14
Chr1	70292388	70313790	Chr1:70292388|70313790	-	2	5	2	0
Chr1	70292388	70315566	Chr1:70292388|70315566	-	109	154	83	103
Chr1	70292388	70316691	Chr1:70292388|70316691	-	1	0	0	0
Chr1	70292388	70324957	Chr1:70292388|70324957	-	3	0	1	4
Chr1	70293504	70306290	Chr1:70293504|70306290	-	2	0	0	0
Chr1	70296130	70306290	Chr1:70296130|70306290	-	2	2	4	6
Chr1	70296130	70313790	Chr1:70296130|70313790	-	1	0	1	2
Chr1	70296130	70315566	Chr1:70296130|70315566	-	11	23	21	23
Chr1	70296130	70324957	Chr1:70296130|70324957	-	3	0	1	0
Chr1	70300764	70306290	Chr1:70300764|70306290	-	1	0	0	0
Chr1	70300764	70313790	Chr1:70300764|70313790	-	4	0	0	6
Chr1	70300764	70315566	Chr1:70300764|70315566	-	8	7	12	26
Chr1	70306224	70315566	Chr1:70306224|70315566	-	4	3	1	3
Chr1	70324853	70345401	Chr1:70324853|70345401	-	7	0	0	0
Chr1	70417937	70424416	Chr1:70417937|70424416	+	3	2	0	0
Chr1	70430317	70458299	Chr1:70430317|70458299	+	1	0	0	0
Chr1	71064969	71066934	Chr1:71064969|71066934	-	2	0	0	0
Chr1	71064969	71069362	Chr1:71064969|71069362	-	8	21	1	9
Chr1	71066776	71070996	Chr1:71066776|71070996	-	1	0	0	0
Chr1	75222361	75237070	Chr1:75222361|75237070	-	2	0	0	0
Chr1	75227726	75238636	Chr1:75227726|75238636	-	1	0	0	0
Chr1	75238513	75243011	Chr1:75238513|75243011	-	3	0	0	2
Chr1	75485925	75541516	Chr1:75485925|75541516	-	2	0	0	0
Chr1	75653195	75653857	Chr1:75653195|75653857	-	1	0	0	0
Chr1	75728401	75734871	Chr1:75728401|75734871	+	6	0	0	3
Chr1	75728401	75740110	Chr1:75728401|75740110	+	2	0	2	0
Chr1	75732644	75734871	Chr1:75732644|75734871	+	7	10	6	3
Chr1	75732644	75734875	Chr1:75732644|75734875	+	3	0	0	0
Chr1	75732644	75740110	Chr1:75732644|75740110	+	2	0	1	1
Chr1	75732644	75745914	Chr1:75732644|75745914	+	1	0	2	3
Chr1	75734791	75745914	Chr1:75734791|75745914	+	1	0	0	1
Chr1	75739980	75749559	Chr1:75739980|75749559	+	12	3	6	5
Chr1	75739980	75750546	Chr1:75739980|75750546	+	23	23	12	12
Chr1	75745806	75750546	Chr1:75745806|75750546	+	16	14	20	6
Chr1	75787497	75794106	Chr1:75787497|75794106	+	2	7	0	1
Chr1	75789952	75790517	Chr1:75789952|75790517	+	1	0	0	0
Chr1	75789952	75794233	Chr1:75789952|75794233	+	1	0	0	0
Chr1	75810697	75848276	Chr1:75810697|75848276	+	1	0	0	0
Chr1	76293292	76313999	Chr1:76293292|76313999	+	2	0	8	2
Chr1	77044204	77063235	Chr1:77044204|77063235	+	2	0	0	0
Chr1	77044204	77068843	Chr1:77044204|77068843	+	2	0	0	0
Chr1	77068950	77086899	Chr1:77068950|77086899	-	1	0	0	0
Chr1	77154449	77169372	Chr1:77154449|77169372	-	7	1	0	0
Chr1	77154449	77169395	Chr1:77154449|77169395	-	11	4	0	6
Chr1	77154449	77210489	Chr1:77154449|77210489	-	5	3	0	1
Chr1	77163846	77210489	Chr1:77163846|77210489	-	2	0	0	0
Chr1	77565442	77566181	Chr1:77565442|77566181	-	8	0	0	0
Chr1	77565442	77584655	Chr1:77565442|77584655	-	4	4	0	5
Chr1	77566081	77584655	Chr1:77566081|77584655	-	1	0	0	0
Chr1	77568332	77579628	Chr1:77568332|77579628	-	2	3	0	0
Chr1	77576068	77579628	Chr1:77576068|77579628	-	2	0	2	1
Chr1	77576068	77641446	Chr1:77576068|77641446	-	2	0	0	0
Chr1	77580998	77633405	Chr1:77580998|77633405	-	3	0	0	0
Chr1	77625730	77633405	Chr1:77625730|77633405	-	2	0	0	0
Chr1	77626380	77641655	Chr1:77626380|77641655	-	2	0	0	0
Chr1	77631835	77641655	Chr1:77631835|77641655	-	3	6	1	6
Chr1	77632187	77641655	Chr1:77632187|77641655	-	1	0	0	0
Chr1	77633115	77641655	Chr1:77633115|77641655	-	14	21	7	3
Chr1	77639449	77641655	Chr1:77639449|77641655	-	1	4	3	2
Chr1	77639449	77645967	Chr1:77639449|77645967	-	1	0	0	0
Chr1	77695197	77697931	Chr1:77695197|77697931	-	1	0	0	0
Chr1	77697139	77697931	Chr1:77697139|77697931	-	1	0	0	0
Chr1	77701369	77714783	Chr1:77701369|77714783	-	3	0	1	0
Chr1	77701369	77722196	Chr1:77701369|77722196	-	6	0	0	0
Chr1	77711747	77714783	Chr1:77711747|77714783	-	3	1	10	12
Chr1	77711747	77715868	Chr1:77711747|77715868	-	18	47	32	20
Chr1	77713200	77715868	Chr1:77713200|77715868	-	5	0	2	6
Chr1	77717867	77725762	Chr1:77717867|77725762	-	13	21	13	12
Chr1	77723331	77736158	Chr1:77723331|77736158	-	6	0	0	0
Chr1	77725622	77734416	Chr1:77725622|77734416	-	1	5	3	9
Chr1	77729860	77739417	Chr1:77729860|77739417	-	4	3	3	0
Chr1	77734347	77739417	Chr1:77734347|77739417	-	5	0	4	14
Chr1	77739265	77741748	Chr1:77739265|77741748	-	3	2	1	2
Chr1	77783238	77803406	Chr1:77783238|77803406	+	1	0	0	0
Chr1	77783238	77807101	Chr1:77783238|77807101	+	8	0	3	0
Chr1	77783238	77815231	Chr1:77783238|77815231	+	4	8	0	3
Chr1	77801331	77807101	Chr1:77801331|77807101	+	10	7	6	6
Chr1	77801331	77815231	Chr1:77801331|77815231	+	27	57	33	42
Chr1	77801331	77843407	Chr1:77801331|77843407	+	1	3	7	3
Chr1	77803270	77813867	Chr1:77803270|77813867	+	2	4	12	6
Chr1	77843307	77861322	Chr1:77843307|77861322	+	1	0	0	0
Chr1	77843307	77866391	Chr1:77843307|77866391	+	3	2	0	0
Chr1	77858938	77861322	Chr1:77858938|77861322	+	14	20	8	10
Chr1	77858938	77864028	Chr1:77858938|77864028	+	11	20	4	13
Chr1	77858938	77866391	Chr1:77858938|77866391	+	8	17	9	7
Chr1	77866338	77875111	Chr1:77866338|77875111	+	3	0	1	0
Chr1	77873001	77875111	Chr1:77873001|77875111	+	28	10	5	7
Chr1	77873004	77875111	Chr1:77873004|77875111	+	2	6	6	6
Chr1	77944183	77947547	Chr1:77944183|77947547	-	2	0	0	0
Chr1	77944183	77949300	Chr1:77944183|77949300	-	1	0	0	0
Chr1	77949155	77962930	Chr1:77949155|77962930	-	2	0	0	3
Chr1	77949155	77963715	Chr1:77949155|77963715	-	1	0	0	0
Chr1	77949155	77964356	Chr1:77949155|77964356	-	5	0	0	2
Chr1	77955255	77956700	Chr1:77955255|77956700	-	3	0	0	1
Chr1	78013051	78013619	Chr1:78013051|78013619	+	6	0	1	0
Chr1	81836885	81862118	Chr1:81836885|81862118	+	12	8	14	11
Chr1	81836885	81883117	Chr1:81836885|81883117	+	2	2	0	2
Chr1	81836885	81890560	Chr1:81836885|81890560	+	3	2	5	3
Chr1	81836885	81907230	Chr1:81836885|81907230	+	135	108	97	59
Chr1	81836885	81936837	Chr1:81836885|81936837	+	4	5	1	5
Chr1	81837005	81907230	Chr1:81837005|81907230	+	3	0	5	1
Chr1	81837005	81936837	Chr1:81837005|81936837	+	6	2	4	2
Chr1	81837005	81956060	Chr1:81837005|81956060	+	2	0	2	0
Chr1	81862019	81907230	Chr1:81862019|81907230	+	2	0	0	0
Chr1	81883054	81907230	Chr1:81883054|81907230	+	8	0	4	3
Chr1	81890456	81907230	Chr1:81890456|81907230	+	4	4	0	1
Chr1	81907017	81936837	Chr1:81907017|81936837	+	3	0	3	3
Chr1	81907017	81956060	Chr1:81907017|81956060	+	5	0	0	1
Chr1	81950189	81956060	Chr1:81950189|81956060	+	7	6	1	2
Chr1	81969295	81990447	Chr1:81969295|81990447	+	1	0	0	0
Chr1	81969365	81990447	Chr1:81969365|81990447	+	6	0	0	0
Chr1	81979869	81985355	Chr1:81979869|81985355	+	1	3	0	0
Chr1	83085562	83086490	Chr1:83085562|83086490	-	2	0	1	0
Chr1	83890321	83906463	Chr1:83890321|83906463	-	2	0	0	0
Chr1	83933608	83942679	Chr1:83933608|83942679	-	4	0	0	0
Chr1	83937852	83949986	Chr1:83937852|83949986	-	3	0	0	0
Chr1	83937852	83952387	Chr1:83937852|83952387	-	1	0	0	1
Chr1	84179177	84185182	Chr1:84179177|84185182	+	3	0	8	0
Chr1	84179177	84197824	Chr1:84179177|84197824	+	3	0	1	1
Chr1	84179177	84202805	Chr1:84179177|84202805	+	4	2	1	0
Chr1	84179177	84214317	Chr1:84179177|84214317	+	3	17	0	6
Chr1	84179177	84235364	Chr1:84179177|84235364	+	1	5	8	4
Chr1	84182200	84197824	Chr1:84182200|84197824	+	5	0	0	0
Chr1	84367650	84372228	Chr1:84367650|84372228	-	4	0	0	0
Chr1	84454673	84466613	Chr1:84454673|84466613	-	2	0	0	0
Chr1	84563257	84566012	Chr1:84563257|84566012	-	4	0	1	0
Chr1	84563257	84570720	Chr1:84563257|84570720	-	1	0	1	1
Chr1	84596212	84598096	Chr1:84596212|84598096	-	2	9	0	2
Chr1	84655832	84671308	Chr1:84655832|84671308	-	7	22	7	5
Chr1	84857800	84866138	Chr1:84857800|84866138	-	3	5	0	1
Chr1	84865381	84866138	Chr1:84865381|84866138	-	5	1	0	0
Chr1	84865385	84865802	Chr1:84865385|84865802	-	1	3	0	0
Chr1	84865385	84866138	Chr1:84865385|84866138	-	130	231	122	178
Chr1	84937755	84947132	Chr1:84937755|84947132	-	3	0	0	0
Chr1	84937755	84952530	Chr1:84937755|84952530	-	3	1	0	0
Chr1	84947033	84956584	Chr1:84947033|84956584	-	2	3	0	0
Chr1	84947033	84965708	Chr1:84947033|84965708	-	1	4	11	9
Chr1	84952243	84958702	Chr1:84952243|84958702	-	1	0	0	1
Chr1	84952243	84965708	Chr1:84952243|84965708	-	4	13	0	5
Chr1	85019153	85025779	Chr1:85019153|85025779	-	1	0	0	0
Chr1	85073054	85082404	Chr1:85073054|85082404	+	1	0	5	1
Chr1	85104524	85124251	Chr1:85104524|85124251	+	1	0	0	0
Chr1	85164526	85169225	Chr1:85164526|85169225	-	4	0	1	0
Chr1	85164526	85178272	Chr1:85164526|85178272	-	4	1	1	3
Chr1	85182098	85190752	Chr1:85182098|85190752	-	3	4	1	2
Chr1	85190057	85190752	Chr1:85190057|85190752	-	8	14	5	4
Chr1	85324740	85358847	Chr1:85324740|85358847	-	1	0	0	0
Chr1	85350415	85358847	Chr1:85350415|85358847	-	5	14	6	5
Chr1	85350415	85367779	Chr1:85350415|85367779	-	7	27	8	10
Chr1	85653977	85702260	Chr1:85653977|85702260	-	2	0	0	0
Chr1	85677236	85706507	Chr1:85677236|85706507	-	1	0	0	0
Chr1	85730508	85761566	Chr1:85730508|85761566	-	1	0	0	0
Chr1	85775674	85786461	Chr1:85775674|85786461	-	21	7	19	9
Chr1	85960758	85971393	Chr1:85960758|85971393	-	1	0	0	0
Chr1	85987601	86050177	Chr1:85987601|86050177	-	5	0	0	0
Chr1	86017151	86050177	Chr1:86017151|86050177	-	5	0	0	0
Chr1	86115325	86126214	Chr1:86115325|86126214	-	1	0	0	0
Chr1	86372431	86384801	Chr1:86372431|86384801	-	2	0	0	8
Chr1	86715724	86719635	Chr1:86715724|86719635	+	1	0	3	12
Chr1	86715724	86724405	Chr1:86715724|86724405	+	12	15	8	14
Chr1	86715724	86735179	Chr1:86715724|86735179	+	2	12	5	2
Chr1	86719507	86724405	Chr1:86719507|86724405	+	4	1	6	10
Chr1	86719507	86742436	Chr1:86719507|86742436	+	1	0	0	1
Chr1	86722540	86724405	Chr1:86722540|86724405	+	2	0	0	0
Chr1	86722540	86735179	Chr1:86722540|86735179	+	1	0	1	0
Chr1	86738661	86742436	Chr1:86738661|86742436	+	3	0	0	0
Chr1	86868053	86903448	Chr1:86868053|86903448	-	6	0	0	1
Chr1	86880662	86908260	Chr1:86880662|86908260	-	3	5	4	0
Chr1	86922408	86922770	Chr1:86922408|86922770	+	5	0	0	0
Chr1	86974912	86980024	Chr1:86974912|86980024	+	3	1	0	0
Chr1	86977811	86985897	Chr1:86977811|86985897	+	1	0	0	0
Chr1	87072934	87092669	Chr1:87072934|87092669	+	9	20	28	7
Chr1	87072938	87092669	Chr1:87072938|87092669	+	3	0	0	0
Chr1	88740988	88741288	Chr1:88740988|88741288	+	4	0	16	4
Chr1	88740988	88760376	Chr1:88740988|88760376	+	5	1	7	2
Chr1	88768833	88786213	Chr1:88768833|88786213	+	2	0	0	0
Chr1	88770352	88771879	Chr1:88770352|88771879	+	8	17	31	20
Chr1	88770352	88786213	Chr1:88770352|88786213	+	35	61	23	29
Chr1	88771421	88771879	Chr1:88771421|88771879	+	4	0	0	0
Chr1	88784639	88786213	Chr1:88784639|88786213	+	1	2	0	5
Chr1	88784639	88790053	Chr1:88784639|88790053	+	7	7	18	8
Chr1	88786104	88806017	Chr1:88786104|88806017	+	10	10	4	6
Chr1	88804391	88813733	Chr1:88804391|88813733	+	1	0	1	0
Chr1	88804846	88813733	Chr1:88804846|88813733	+	2	0	0	0
Chr1	88807313	88822003	Chr1:88807313|88822003	+	6	0	9	5
Chr1	88807313	88828623	Chr1:88807313|88828623	+	2	0	0	0
Chr1	88828994	88833732	Chr1:88828994|88833732	-	1	0	0	0
Chr1	88936099	88949277	Chr1:88936099|88949277	-	6	0	0	0
Chr1	88936099	88955225	Chr1:88936099|88955225	-	3	0	3	2
Chr1	88936099	88969467	Chr1:88936099|88969467	-	5	2	0	1
Chr1	88955149	88969467	Chr1:88955149|88969467	-	1	0	0	0
Chr1	89012127	89014235	Chr1:89012127|89014235	+	1	0	0	0
Chr1	89558711	89568493	Chr1:89558711|89568493	+	2	0	0	0
Chr1	89843638	89846658	Chr1:89843638|89846658	+	5	7	4	2
Chr1	89929808	89933474	Chr1:89929808|89933474	+	4	0	0	0
Chr1	89933067	89953899	Chr1:89933067|89953899	+	2	0	0	0
Chr1	89998110	90010286	Chr1:89998110|90010286	+	2	0	0	0
Chr1	90005133	90007750	Chr1:90005133|90007750	+	6	1	3	0
Chr1	90017317	90022345	Chr1:90017317|90022345	+	2	0	0	0
Chr1	90831930	90837765	Chr1:90831930|90837765	-	1	0	0	3
Chr1	90916640	90918154	Chr1:90916640|90918154	-	63	33	32	13
Chr1	90916640	90982370	Chr1:90916640|90982370	-	4	1	2	8
Chr1	90916760	90918154	Chr1:90916760|90918154	-	1	0	0	0
Chr1	91020637	91021201	Chr1:91020637|91021201	-	5	0	0	0
Chr1	91313349	91319390	Chr1:91313349|91319390	-	1	0	0	0
Chr1	91343414	91375446	Chr1:91343414|91375446	-	2	0	0	0
Chr1	91343430	91353152	Chr1:91343430|91353152	-	4	0	0	1
Chr1	91343430	91353299	Chr1:91343430|91353299	-	12	19	7	19
Chr1	91343430	91380236	Chr1:91343430|91380236	-	1	0	0	0
Chr1	91347429	91353299	Chr1:91347429|91353299	-	7	0	0	0
Chr1	91375358	91385834	Chr1:91375358|91385834	-	5	4	5	6
Chr1	91501654	91520279	Chr1:91501654|91520279	+	2	0	0	0
Chr1	91513948	91520279	Chr1:91513948|91520279	+	3	0	0	0
Chr1	91695672	91712399	Chr1:91695672|91712399	-	4	0	0	0
Chr1	91734776	91758750	Chr1:91734776|91758750	-	3	0	0	2
[truncated: 105,001 more rows]

## Sheet: Table S1B. HEK293_EIciRNA
Supplemental Table S1B: EIciRNAs detected with FEICP from RNase R-treated RNA-seq in HEK293 cells
						#BSJ
chr	circ_start	circ_end	intron_start	intron_end	strand	HEK293_rep1	HEK293_rep2	HEK293_rep3	HEK293_rep4
Chr1	930154	931089	930336	931038	+	1	4	0	0
Chr1	935771	939412	939129	939271	+	0	0	0	2
Chr1	935771	939460	939129	939271	+	0	0	3	0
Chr1	955922	957025	956013	956094	-	1	0	0	0
Chr1	955922	957273	957025	957098	-	2	0	3	0
Chr1	1051252	1051815	1051645	1051727	+	0	6	0	0
Chr1	1223243	1223968	1223357	1223831	-	0	0	1	0
Chr1	1256991	1257310	1257130	1257207	-	18	6	12	12
Chr1	1256991	1263386	1257130	1257207	-	3	3	0	0
Chr1	1262169	1263386	1262390	1263345	-	0	0	0	2
Chr1	1262268	1263386	1262390	1263345	-	4	0	0	0
Chr1	1263345	1267992	1263386	1267732	-	0	0	0	1
Chr1	1313508	1314962	1314365	1314823	-	0	0	0	1
Chr1	1337976	1338653	1338436	1338521	-	3	0	0	0
Chr1	1489203	1490671	1490424	1490562	+	0	0	0	1
Chr1	1637407	1637883	1637513	1637761	-	0	0	2	0
Chr1	1655368	1657498	1657302	1657374	-	2	0	3	2
Chr1	1668326	1670151	1669736	1670097	-	1	7	0	0
Chr1	1669663	1670151	1669736	1670097	-	2	7	4	3
Chr1	1734689	1739704	1734835	1738320	-	1	0	0	0
Chr1	1756257	1756882	1756608	1756738	-	0	0	3	0
Chr1	1756502	1756882	1756608	1756738	-	0	0	1	0
Chr1	1804418	1817875	1804581	1806474	-	0	0	0	3
Chr1	1825396	1839238	1825499	1839189	-	4	0	3	1
Chr1	2055440	2059591	2055562	2056483	+	5	0	3	1
Chr1	2144209	2145511	2144341	2145388	+	0	0	2	0
Chr1	6651528	6654039	6652951	6653910	-	1	0	0	0
Chr1	8541213	8614686	8557523	8614560	-	0	0	0	1
Chr1	8863234	8867250	8864092	8865284	-	0	0	0	1
Chr1	10347760	10348733	10347827	10348648	+	0	0	0	1
Chr1	10363282	10365648	10365245	10365408	+	0	1	0	0
Chr1	10365099	10365648	10365245	10365408	+	0	0	6	0
Chr1	10411417	10413251	10411552	10413061	+	0	0	0	4
Chr1	11073933	11074326	11074008	11074230	-	1	1	0	4
Chr1	11073933	11076948	11074008	11074230	-	2	0	0	5
Chr1	11199257	11199703	11199403	11199540	-	0	0	0	2
Chr1	15717892	15721388	15717992	15718537	+	0	0	1	4
Chr1	15764492	15765233	15764685	15764963	+	0	4	0	0
Chr1	15867878	15873136	15867976	15872815	+	0	6	0	0
Chr1	15867878	15920983	15873136	15876201	+	0	0	0	1
Chr1	15872815	15876678	15873136	15876201	+	0	15	0	5
Chr1	15909323	15916279	15911301	15916127	+	0	0	1	0
Chr1	15911100	15916279	15911301	15916127	+	0	0	1	0
Chr1	16201781	16202574	16201861	16202415	-	1	3	2	3
Chr1	17022607	17024074	17022730	17023972	-	0	4	0	0
Chr1	19243613	19244015	19243707	19243949	-	0	9	11	1
Chr1	20749722	20773610	20771073	20773450	-	2	0	3	2
Chr1	20757165	20773610	20771073	20773450	-	0	0	2	2
Chr1	20893516	20895501	20893636	20895367	-	0	0	0	1
Chr1	21001198	21002808	21001312	21002712	-	0	0	0	3
Chr1	21050865	21089213	21050994	21089137	-	1	3	0	0
Chr1	21089137	21111383	21089213	21111322	-	0	0	1	0
Chr1	21219958	21221842	21220131	21221746	-	0	0	1	2
Chr1	21472842	21474951	21472915	21473379	+	0	4	0	0
Chr1	22501491	22502441	22501684	22502298	+	0	0	1	1
Chr1	23030468	23050520	23030634	23044426	+	0	3	1	2
Chr1	23030468	23059167	23030634	23044426	+	0	0	0	1
Chr1	23337753	23338608	23337861	23338489	-	0	0	0	1
Chr1	23772110	23772426	23772166	23772267	-	0	0	4	1
Chr1	25243549	25244498	25244224	25244453	-	0	0	1	0
Chr1	25553921	25557267	25554064	25554859	+	0	3	0	0
Chr1	25809682	25811535	25809820	25811453	+	4	0	0	0
Chr1	26941456	26941818	26941660	26941752	+	4	0	7	0
Chr1	26942659	26943065	26942776	26942870	+	5	11	13	10
Chr1	27789561	27793632	27789631	27793532	+	0	0	0	2
Chr1	28560632	28561398	28560732	28561112	+	2	0	0	1
Chr1	29015691	29018442	29015767	29018223	+	0	0	0	1
Chr1	30965981	30968492	30966278	30967166	-	0	7	0	0
Chr1	30992389	30995220	30992660	30995053	-	6	0	4	1
Chr1	30992389	31007102	30992660	30995053	-	0	0	1	0
Chr1	32036909	32038619	32038119	32038551	+	0	0	4	0
Chr1	32154587	32158361	32156945	32157345	+	0	0	0	1
Chr1	32187953	32190249	32188124	32190054	+	0	0	2	0
Chr1	32224033	32224475	32224121	32224409	+	20	6	12	6
Chr1	32324478	32327677	32327077	32327535	+	0	0	1	0
Chr1	32326938	32327677	32327077	32327535	+	10	4	9	4
Chr1	32633644	32634792	32633727	32633950	-	0	1	0	1
Chr1	33294936	33295305	33295015	33295146	+	10	12	2	6
Chr1	35104294	35104769	35104469	35104556	+	8	0	0	0
Chr1	35358924	35361789	35361255	35361618	+	1	3	1	2
Chr1	35743140	35743530	35743241	35743454	-	0	0	2	0
Chr1	37495884	37496604	37495918	37496546	-	0	8	0	0
Chr1	39452155	39452812	39452350	39452683	+	1	0	0	0
Chr1	39853969	39857417	39854068	39857276	-	0	0	0	1
Chr1	40064226	40064559	40064370	40064473	+	0	0	2	0
Chr1	40995916	40997526	40996068	40997393	+	0	3	0	3
Chr1	41160874	41161432	41160898	41161363	-	0	0	3	0
Chr1	42227882	42311110	42278672	42311049	-	0	6	0	0
Chr1	42265114	42311110	42278672	42311049	-	6	5	0	0
Chr1	42278347	42311110	42278672	42311049	-	0	3	1	0
Chr1	42278347	42323827	42278672	42311049	-	1	6	0	0
Chr1	44757555	44758140	44757971	44758048	+	0	4	0	0
Chr1	45004247	45007271	45005883	45005996	-	0	0	0	2
Chr1	45614095	45616393	45615471	45616336	+	0	0	0	2
Chr1	46309100	46310316	46309127	46310154	+	1	0	4	2
Chr1	46408458	46412251	46410854	46411611	+	0	0	0	2
Chr1	47295764	47304996	47301748	47302233	-	1	0	0	0
Chr1	47368468	47373107	47368615	47372954	+	0	4	0	0
Chr1	48451551	48453131	48451600	48452993	-	0	10	1	1
Chr1	51421785	51448135	51447105	51448045	-	0	0	0	1
Chr1	51772069	51772723	51772182	51772604	+	2	12	3	2
Chr1	51814034	51814813	51814609	51814692	-	0	0	0	2
Chr1	51814034	51816389	51814609	51814692	-	0	0	0	2
Chr1	52477707	52481923	52481635	52481803	-	0	0	1	0
Chr1	52813535	52813912	52813733	52813859	+	0	0	1	0
Chr1	52877681	52877969	52877843	52877924	+	0	0	2	0
Chr1	64989434	64993581	64993355	64993471	-	1	0	0	2
Chr1	64989434	64995088	64993355	64993471	-	0	1	0	0
Chr1	66940027	66963160	66940052	66946149	+	0	9	0	5
Chr1	75789951	75794233	75790057	75790151	+	1	0	0	0
Chr1	77631849	77641655	77641446	77641521	-	0	0	1	0
Chr1	77955254	77956700	77955329	77956571	-	3	0	0	0
Chr1	88770351	88771879	88771566	88771662	+	0	0	0	2
Chr1	91375357	91385234	91375446	91375526	-	0	4	0	0
Chr1	91375357	91385834	91375446	91375526	-	0	0	0	2
Chr1	93183359	93193744	93183495	93183977	+	0	2	0	0
Chr1	109409927	109411113	109410014	109411010	-	0	4	0	0
Chr1	110222963	110226178	110223900	110225974	+	3	0	0	0
Chr1	112996840	112999109	112996933	112998929	+	0	5	0	0
Chr1	114608685	114611117	114608873	114611072	-	0	0	0	1
Chr1	114719578	114720717	114719742	114720538	-	0	0	0	1
Chr1	117402185	117414831	117402441	117405548	+	0	1	0	1
Chr1	145853503	145854880	145854563	145854745	+	0	0	4	0
Chr1	147272170	147272630	147272281	147272446	+	0	0	0	1
Chr1	150076915	150077231	150076984	150077093	+	0	1	0	1
Chr1	150492410	150496908	150496628	150496809	+	0	0	0	1
Chr1	150959177	150961191	150959347	150960562	+	0	4	0	0
Chr1	151166933	151167414	151167218	151167325	+	0	0	0	1
Chr1	151224244	151227400	151224406	151227319	+	3	0	0	0
Chr1	151224244	151232703	151232365	151232550	+	4	0	0	0
Chr1	151224247	151227400	151224406	151227319	+	0	6	0	3
Chr1	151224247	151232703	151232365	151232550	+	0	0	0	1
Chr1	151239954	151242567	151240039	151242437	+	0	2	0	0
Chr1	152248894	152251758	152249012	152251652	+	0	4	0	0
Chr1	154213892	154214574	154213946	154214456	-	0	0	1	0
Chr1	154588550	154597267	154596995	154597122	-	0	0	2	0
Chr1	154990158	154990528	154990257	154990338	+	0	0	0	1
Chr1	155265859	155266895	155265954	155266728	-	0	0	0	1
Chr1	155676547	155679512	155679313	155679408	-	0	0	0	2
Chr1	155725381	155726019	155725490	155725926	+	9	15	10	2
Chr1	155725381	155731415	155725490	155725926	+	0	0	0	1
Chr1	155904310	155904804	155904502	155904730	-	0	0	0	1
Chr1	155921374	155923687	155921628	155921860	-	0	3	0	0
Chr1	155926675	155927156	155926839	155927103	-	10	10	3	0
Chr1	156233627	156236483	156233728	156236287	+	0	0	0	1
Chr1	161168992	161170024	161169720	161169905	+	0	0	1	3
Chr1	161791407	161792327	161791537	161792123	+	0	0	0	2
Chr1	165890203	165891322	165890363	165891225	+	0	0	0	2
Chr1	168235100	168239160	168236770	168239130	+	0	0	0	1
Chr1	173864483	173865282	173864704	173865228	-	0	4	0	0
Chr1	173865856	173866206	173865894	173866176	-	3	0	0	1
Chr1	173866527	173866796	173866567	173866760	-	0	0	0	7
Chr1	178123055	178125501	178123815	178125326	+	0	0	0	2
Chr1	179063926	179064496	179064098	179064304	+	8	13	3	9
Chr1	179063926	179066859	179064098	179064304	+	0	7	3	2
Chr1	180984676	181005463	181002700	181005293	-	1	3	0	0
Chr1	181002605	181005463	181002700	181005293	-	0	0	0	1
Chr1	182874853	182880608	182874954	182876049	+	0	0	0	1
Chr1	186385987	186389624	186388548	186389587	+	0	3	0	0
Chr1	193028084	193029657	193029449	193029531	-	3	0	0	0
Chr1	202001375	202003461	202001488	202001658	+	0	6	0	0
Chr1	204112914	204114605	204113134	204114320	+	0	0	2	0
Chr1	206484996	206493119	206485072	206485193	+	0	2	0	0
Chr1	211271231	211274262	211271309	211271527	+	0	0	0	2
Chr1	211271231	211278241	211271309	211271527	+	0	0	0	1
Chr1	212020121	212021212	212020268	212020720	-	0	0	0	1
Chr1	212044659	212047417	212047212	212047296	+	0	0	3	0
Chr1	215575900	215579999	215577728	215578000	+	2	0	0	0
Chr1	217610320	217614202	217610400	217610888	-	0	0	0	1
Chr1	223804173	223806947	223804348	223806845	-	0	0	1	1
Chr1	224680957	224684843	224681026	224684795	+	0	0	1	1
Chr1	224952669	224968874	224967583	224968758	+	0	8	0	1
Chr1	224952669	224974153	224967583	224968758	+	2	0	4	3
Chr1	224952669	225007544	224967583	224968758	+	0	1	0	1
Chr1	225002782	225085789	225038823	225042834	+	0	1	0	0
Chr1	225038693	225043983	225038823	225042834	+	3	1	0	1
Chr1	225038693	225100884	225038823	225042834	+	0	0	0	1
Chr1	225079206	225097239	225085789	225097117	+	0	0	0	1
Chr1	226265532	226266332	226265634	226266212	-	1	0	0	0
Chr1	226961376	226965737	226965410	226965670	+	0	6	0	0
Chr1	229486370	229487613	229486528	229487465	-	0	0	1	0
Chr1	230954332	230961303	230954403	230956420	-	0	11	0	1
Chr1	233217898	233227371	233217931	233218030	-	6	0	7	3
Chr1	233217898	233236980	233217931	233218030	-	0	0	3	0
Chr1	233346441	233362293	233355011	233362052	+	0	2	0	0
Chr1	235335241	235342883	235342346	235342835	+	0	1	0	0
Chr1	235341707	235342883	235342346	235342835	+	8	5	3	3
Chr1	235470849	235494828	235489268	235494680	-	0	0	0	1
Chr1	235480053	235494828	235489268	235494680	-	0	0	0	1
Chr1	235480053	235496308	235494828	235496185	-	5	0	0	0
Chr1	235494680	235496308	235494828	235496185	-	6	0	2	0
Chr1	236168705	236183906	236178636	236179878	+	0	3	0	0
Chr1	236178413	236183906	236178636	236179878	+	0	4	0	0
Chr1	236806143	236816543	236806233	236808703	+	0	0	0	1
Chr1	243293090	243308177	243304777	243307988	+	0	0	0	1
Chr1	243304712	243316893	243304777	243307988	+	0	5	1	0
Chr1	243304712	243330692	243304777	243307988	+	0	9	0	1
Chr10	3134482	3135838	3134582	3135735	+	0	0	0	1
Chr10	5794884	5800705	5795019	5796762	-	0	0	0	1
Chr10	7188623	7285954	7284150	7285865	-	0	3	0	0
Chr10	7220410	7285954	7284150	7285865	-	1	1	0	0
Chr10	7243557	7285954	7284150	7285865	-	2	10	3	3
Chr10	7276891	7285954	7284150	7285865	-	1	4	2	11
Chr10	7283903	7285954	7284150	7285865	-	0	0	0	1
Chr10	12081471	12087729	12084751	12087534	+	0	0	0	1
Chr10	12081471	12113064	12084751	12087534	+	0	0	0	1
Chr10	24494499	24513434	24494604	24495146	+	0	0	0	1
Chr10	27028851	27029356	27028945	27029285	-	3	0	1	0
Chr10	27028851	27038054	27028945	27029285	-	0	2	0	0
Chr10	27060344	27061242	27060540	27061143	-	1	2	9	1
Chr10	27532506	27533994	27533853	27533927	+	0	0	0	2
Chr10	31373017	31387798	31387266	31387719	+	0	2	0	0
Chr10	45461230	45464327	45461411	45463150	-	0	0	0	1
Chr10	48401611	48410168	48409937	48410029	+	3	2	0	0
Chr10	67887416	67891554	67889123	67891401	+	0	0	0	1
Chr10	68337198	68337996	68337333	68337857	+	0	0	0	2
Chr10	68393137	68394451	68394136	68394327	-	2	2	2	0
Chr10	68393137	68404844	68394136	68394327	-	2	0	0	0
Chr10	68394074	68394451	68394136	68394327	-	10	1	5	1
Chr10	68488466	68493570	68493198	68493448	-	0	8	0	0
Chr10	68737844	68747566	68747275	68747373	+	0	0	0	2
Chr10	68747160	68747566	68747275	68747373	+	1	0	1	0
Chr10	68756272	68773099	68756483	68757293	+	0	0	0	1
Chr10	68911067	68914204	68913576	68914058	+	0	0	0	2
Chr10	68913161	68914204	68913576	68914058	+	0	0	0	2
Chr10	69483690	69498396	69495689	69498279	+	0	0	0	2
Chr10	72715110	72715902	72715226	72715853	+	4	3	5	1
Chr10	73571420	73576361	73575675	73576135	-	13	6	1	4
Chr10	73575511	73576361	73575675	73576135	-	4	11	9	8
Chr10	75219062	75219356	75219215	75219303	+	0	3	4	14
Chr10	80157640	80164143	80157763	80157966	-	0	0	0	2
Chr10	87767672	87776427	87767723	87770951	-	0	0	0	3
Chr10	91992118	92008275	91996570	91997602	+	0	0	2	0
Chr10	91994534	92008275	91996570	91997602	+	0	4	0	0
Chr10	91996368	92008275	91996570	91997602	+	0	0	0	1
Chr10	92008122	92009208	92008950	92009040	+	0	0	1	0
Chr10	92008828	92009208	92008950	92009040	+	10	8	9	3
Chr10	92637183	92637545	92637309	92637386	+	0	5	1	0
Chr10	92637183	92639900	92637309	92637386	+	0	0	0	3
Chr10	92637183	92645642	92637309	92637386	+	0	0	0	2
Chr10	94576661	94588390	94576805	94581325	+	0	2	0	0
Chr10	94594694	94608026	94601611	94607909	+	0	0	0	2
Chr10	97437190	97437750	97437275	97437699	-	73	55	33	39
Chr10	97437190	97438703	97437275	97437699	-	7	4	4	2
Chr10	97743093	97744915	97743164	97744728	+	0	7	2	4
Chr10	98162882	98163397	98162975	98163292	+	4	0	1	0
Chr10	100178132	100179247	100178194	100179200	-	1	2	1	0
Chr10	100488026	100489761	100489398	100489702	-	0	0	0	1
Chr10	100979847	100981229	100980693	100980821	+	5	5	1	0
Chr10	101667885	101676436	101673047	101673487	-	2	0	2	2
Chr10	101672914	101676436	101673047	101673487	-	10	0	0	0
Chr10	101790895	101791439	101791088	101791353	-	0	4	0	0
Chr10	101800241	101807901	101806143	101807729	-	0	0	0	1
Chr10	102143044	102145090	102144307	102145019	+	0	0	1	0
Chr10	102144249	102145090	102144307	102145019	+	1	0	0	0
Chr10	102157018	102158214	102157074	102157185	+	0	0	2	0
Chr10	102362474	102363798	102362664	102363255	+	1	0	0	0
Chr10	102362474	102365599	102362664	102363255	+	0	0	0	1
Chr10	102473569	102474012	102473741	102473818	+	1	0	0	1
Chr10	103093971	103094455	103094038	103094347	-	0	0	0	3
Chr10	103438014	103438808	103438071	103438685	+	20	33	18	25
Chr10	103439745	103440581	103439868	103440289	+	0	0	0	2
Chr10	103439745	103440850	103440581	103440733	+	1	1	2	5
Chr10	103611580	103661114	103627202	103660982	-	1	0	0	0
Chr10	104018159	104019922	104018908	104019733	+	0	0	0	1
Chr10	110596397	110598290	110596550	110598138	+	0	1	6	16
Chr10	113040024	113089540	113040126	113089399	+	0	3	0	0
Chr10	116692350	116707285	116692467	116698634	-	0	0	0	1
Chr10	118033981	118040565	118034041	118038971	-	0	0	0	2
Chr10	118729294	118730410	118729397	118730283	-	0	4	0	0
Chr10	119065398	119071085	119065570	119069445	-	0	0	0	2
Chr10	119160914	119162414	119161081	119162339	-	0	0	0	1
Chr10	119579934	119582223	119582009	119582168	-	0	0	3	0
Chr10	120503817	120521095	120518896	120520970	+	1	0	0	0
Chr10	120513910	120521095	120518896	120520970	+	5	1	6	3
Chr10	120852523	120865744	120852635	120858642	+	0	2	0	0
Chr10	122392302	122400388	122392372	122393180	+	0	0	0	1
Chr10	122488901	122489626	122489001	122489421	+	0	0	1	0
Chr10	124402926	124403920	124403055	124403797	-	0	0	0	1
Chr10	124408541	124412200	124408637	124408740	-	0	0	1	0
Chr10	124681606	124696212	124682379	124696157	-	0	0	1	0
Chr10	125794879	125798145	125796861	125798064	-	0	0	0	1
Chr10	127125473	127127764	127125601	127127668	+	0	0	0	2
Chr10	130166506	130171636	130166980	130169432	+	0	1	0	0
Chr10	133395712	133396267	133395777	133396162	+	0	3	0	0
Chr10	133491221	133498005	133493490	133497828	+	0	0	0	1
Chr11	497970	502181	500654	502061	-	0	4	0	0
Chr11	581491	582081	581606	581961	+	10	0	21	10
Chr11	581491	587464	581606	581961	+	0	0	4	0
Chr11	596922	598502	597020	597394	+	0	0	3	0
Chr11	687910	688460	688057	688330	-	0	4	0	0
Chr11	771332	772521	771467	772426	-	0	0	0	2
Chr11	772426	773629	772521	773521	-	0	0	2	0
Chr11	847200	850367	847300	850287	+	1	4	0	0
Chr11	992502	994245	993985	994071	+	3	0	0	0
Chr11	1000431	1003804	1000598	1003721	+	11	6	10	2
Chr11	1445293	1445907	1445458	1445570	+	0	0	0	3
Chr11	1480392	1480885	1480486	1480724	-	0	20	0	0
Chr11	2949226	2951315	2949264	2951258	-	2	0	0	0
Chr11	3012194	3015849	3012276	3015780	-	0	0	0	2
Chr11	3119546	3120624	3119631	3120420	-	0	0	3	0
Chr11	3691346	3693375	3691489	3693231	-	0	0	0	1
Chr11	3691346	3695606	3691489	3693231	-	0	4	0	0
Chr11	5603245	5603735	5603561	5603639	+	21	14	10	5
Chr11	6941570	6955782	6943215	6943545	+	0	4	0	0
Chr11	8089609	8090231	8089661	8090068	+	0	1	0	0
Chr11	9178131	9179073	9178366	9178857	-	1	0	0	0
Chr11	9414254	9417148	9414411	9417058	+	4	0	0	0
Chr11	9429673	9431003	9429834	9430874	+	3	1	0	0
Chr11	9807999	9809002	9808185	9808900	-	0	1	0	0
Chr11	10799551	10800348	10799756	10800089	-	1	0	0	0
Chr11	12862249	12864900	12862314	12864837	+	0	0	4	0
Chr11	14294470	14295855	14294862	14295767	-	0	0	0	1
Chr11	14513816	14514491	14513887	14514402	-	2	0	0	0
Chr11	14771936	14789242	14786685	14789105	+	3	18	0	5
Chr11	16802971	16803295	16803052	16803226	-	0	0	0	1
Chr11	18000496	18010139	18006746	18007940	-	1	2	1	0
Chr11	33141666	33141986	33141762	33141884	-	0	6	0	0
Chr11	34071725	34076642	34076474	34076559	+	8	0	6	3
Chr11	34076235	34076642	34076474	34076559	+	0	1	1	0
Chr11	34086063	34086413	34086219	34086304	+	0	0	0	7
Chr11	34090178	34092056	34090289	34090528	+	3	0	0	0
Chr11	34133025	34134586	34133142	34134318	+	1	0	0	0
Chr11	46433473	46435037	46433628	46434848	-	1	3	2	0
Chr11	46767574	46790583	46788773	46790075	-	0	1	0	0
Chr11	46783273	46788773	46784673	46788680	-	2	0	0	0
Chr11	46788680	46790583	46788773	46790075	-	0	0	0	1
Chr11	47261240	47262018	47261449	47261546	+	1	0	0	1
Chr11	47295495	47296055	47295579	47295896	+	4	2	6	4
Chr11	47411925	47412467	47412039	47412345	+	0	0	3	0
Chr11	47473087	47482856	47473231	47475335	-	0	0	0	1
Chr11	47625673	47627127	47625741	47627079	-	1	5	6	4
Chr11	47731373	47765362	47731561	47732536	-	0	0	0	2
Chr11	47804548	47806312	47804618	47806152	-	0	0	0	1
Chr11	61364432	61367998	61364518	61366044	+	0	0	0	1
Chr11	61366044	61367998	61366216	61367922	+	17	25	1	14
Chr11	61410937	61411937	61411105	61411768	-	6	0	0	0
Chr11	61437624	61438342	61438113	61438244	+	0	1	0	0
Chr11	61862971	61863786	61863069	61863281	+	0	1	0	0
Chr11	62535944	62536567	62536098	62536238	-	0	0	1	3
Chr11	62638982	62639731	62639467	62639626	-	1	0	0	2
Chr11	62694567	62702549	62694711	62702467	-	0	0	0	1
Chr11	62798538	62800486	62798575	62800376	-	0	0	0	2
Chr11	62801093	62801417	62801201	62801328	-	3	0	0	0
Chr11	62853074	62853590	62853115	62853551	-	0	0	1	0
Chr11	62854518	62855216	62854938	62855132	-	0	5	0	2
Chr11	62854887	62855216	62854938	62855132	-	0	0	1	0
Chr11	62854887	62855466	62854938	62855132	-	0	0	3	0
Chr11	62855132	62855466	62855216	62855423	-	0	2	0	0
Chr11	62870744	62871669	62870837	62871576	+	0	4	0	0
Chr11	63651935	63652575	63651986	63652470	-	3	0	0	1
Chr11	63895158	63895633	63895338	63895579	+	3	1	1	1
Chr11	63952237	63952839	63952565	63952755	+	0	0	1	0
Chr11	64193077	64194620	64194330	64194478	+	0	0	0	1
Chr11	64769222	64770408	64769338	64769425	-	0	0	0	1
Chr11	65032167	65032551	65032203	65032430	+	0	0	2	0
Chr11	65267476	65268729	65267568	65268671	+	0	0	0	1
Chr11	65393572	65394425	65393674	65394040	+	1	0	0	6
Chr11	65540012	65540382	65540153	65540244	-	0	0	3	0
Chr11	65540870	65543549	65540954	65541125	-	0	0	3	0
Chr11	65655687	65662205	65662088	65662178	-	0	0	0	2
Chr11	66238803	66239277	66238846	66239141	+	1	0	0	0
Chr11	66365935	66369532	66369199	66369368	-	2	0	0	0
Chr11	66756352	66788269	66759096	66788159	+	3	5	0	0
Chr11	67393495	67393790	67393610	67393690	+	3	5	0	6
Chr11	67584133	67584772	67584169	67584463	+	0	6	0	0
Chr11	68032151	68033283	68032209	68032285	+	0	1	0	0
Chr11	68423488	68426187	68425292	68425977	+	0	0	3	0
Chr11	68505144	68558679	68554257	68558565	+	0	4	0	0
Chr11	68892889	68898012	68896678	68897926	-	5	0	0	0
Chr11	69054032	69057694	69054097	69054720	+	0	0	0	1
Chr11	69081399	69084016	69081499	69083944	+	0	1	0	0
Chr11	70349922	70356254	70350039	70354300	+	0	3	0	0
Chr11	70405264	70417123	70407591	70409830	+	0	0	1	0
Chr11	70419745	70420510	70419856	70420399	+	5	2	1	4
Chr11	70419745	70425401	70419856	70420399	+	0	1	0	0
Chr11	71960749	71962289	71960891	71962151	+	0	4	0	0
Chr11	72712195	72713243	72712339	72712437	-	1	0	0	0
Chr11	73419873	73430770	73419999	73425021	-	0	0	0	1
Chr11	73707419	73718890	73716362	73718784	-	2	0	1	0
Chr11	74203727	74204445	74203821	74204352	+	8	16	9	3
Chr11	77624962	77625818	77625070	77625716	-	6	19	0	4
Chr11	78103979	78121174	78119249	78121064	-	0	0	0	2
Chr11	78566131	78571444	78566272	78568631	-	0	0	0	4
Chr11	85662388	85663601	85662457	85663523	-	0	4	0	0
Chr11	85976622	85981228	85978093	85981128	-	0	3	0	0
Chr11	85981744	85982003	85981775	85981871	-	0	2	0	0
Chr11	86250295	86256512	86255287	86256386	+	0	2	0	0
Chr11	86255221	86256512	86255287	86256386	+	2	4	0	1
Chr11	86255221	86268561	86255287	86256386	+	0	4	0	0
Chr11	93733086	93734660	93733121	93733349	-	0	0	0	1
Chr11	103116569	103133707	103129005	103133554	+	0	0	0	1
Chr11	103287532	103399872	103287605	103303092	+	0	1	0	0
Chr11	108046269	108054955	108054792	108054874	+	3	0	0	0
Chr11	108224783	108235834	108227696	108227775	+	0	0	0	2
Chr11	108294926	108299885	108295059	108297286	+	0	4	0	0
Chr11	117218465	117224755	117218568	117219056	-	0	0	2	0
Chr11	119020149	119021886	119020253	119021759	+	0	12	0	0
Chr11	121053550	121055308	121053732	121055051	+	0	0	2	0
Chr11	123740116	123740536	123740232	123740416	-	0	0	0	1
Chr11	126272968	126273454	126273079	126273315	+	2	6	5	1
Chr11	129093620	129124894	129123530	129123887	-	3	0	0	0
Chr11	129123445	129124894	129123530	129123887	-	0	2	0	1
Chr11	129123445	129164427	129123530	129123887	-	1	4	0	0
Chr12	350620	352324	350779	352204	-	0	0	0	2
Chr12	813641	830160	827262	830002	+	2	0	0	0
Chr12	827041	830160	827262	830002	+	0	1	0	2
Chr12	916343	916820	916535	916638	-	0	3	4	1
Chr12	929763	930144	929886	930050	-	7	0	0	0
Chr12	929818	930144	929886	930050	-	1	0	2	0
Chr12	2820085	2821792	2820225	2820723	+	2	0	2	0
Chr12	6563314	6563946	6563514	6563613	-	0	0	3	0
Chr12	8943404	8943910	8943535	8943800	-	0	0	0	2
Chr12	22643762	22661205	22659154	22661062	+	0	0	0	2
Chr12	22643762	22673660	22659154	22661062	+	0	0	1	0
Chr12	22659013	22673660	22659154	22661062	+	0	0	0	1
Chr12	25995036	26055446	25995130	26055235	+	0	0	0	1
Chr12	26990449	27003390	26999676	27003235	-	0	0	0	2
Chr12	27714779	27724186	27714820	27716290	+	0	0	0	1
Chr12	28225794	28259442	28255662	28257201	+	2	0	0	4
Chr12	28255580	28259442	28255662	28257201	+	4	2	2	18
Chr12	29659879	29660885	29659983	29660803	-	1	4	0	2
Chr12	42210354	42210680	42210454	42210547	-	9	10	8	19
Chr12	43452273	43454052	43452695	43453906	-	0	0	0	1
Chr12	45836588	45839496	45836655	45836740	+	0	0	0	1
Chr12	46229152	46243314	46229639	46239678	-	0	0	3	0
Chr12	48088800	48098124	48088960	48089162	-	0	5	0	0
Chr12	48695758	48698183	48696162	48698137	-	1	0	0	0
Chr12	49097565	49098105	49097739	49097943	-	4	3	0	8
Chr12	50427761	50430570	50427909	50428916	+	0	0	0	1
Chr12	50454313	50461347	50454417	50461134	+	0	3	1	1
Chr12	51055834	51056502	51056245	51056349	+	0	0	0	2
Chr12	51103669	51104203	51103763	51104154	-	0	0	0	2
Chr12	51975264	51991993	51986942	51991862	+	0	0	0	1
Chr12	53027781	53028188	53027919	53028014	+	0	0	1	0
Chr12	53170071	53170502	53170126	53170422	-	0	0	1	1
Chr12	56110398	56110692	56110477	56110558	+	0	0	0	1
Chr12	56116774	56117211	56116930	56117188	+	1	6	0	0
Chr12	56133416	56134428	56133873	56134079	+	0	2	1	0
Chr12	56137831	56138272	56138074	56138182	+	0	4	0	0
Chr12	56169528	56170208	56169695	56169775	-	0	0	1	0
Chr12	56282419	56282991	56282608	56282859	-	0	0	2	0
Chr12	56285915	56286645	56286023	56286496	-	2	0	1	2
Chr12	56285915	56298691	56286023	56286496	-	1	0	0	0
Chr12	56348528	56349636	56349261	56349344	-	0	6	1	0
Chr12	56568974	56569990	56569033	56569898	+	0	0	0	1
Chr12	56581832	56582152	56581879	56582058	+	0	0	1	0
Chr12	56598867	56599358	56599011	56599128	-	0	0	0	3
Chr12	56603358	56605327	56604799	56605072	-	0	3	0	0
Chr12	56604216	56605327	56604799	56605072	-	0	3	0	0
Chr12	56664775	56673065	56671847	56672739	-	0	0	0	1
Chr12	56670274	56673065	56671847	56672739	-	0	0	1	0
Chr12	56671748	56673065	56671847	56672739	-	0	0	4	2
Chr12	56739293	56747032	56746854	56746925	-	0	3	0	0
Chr12	57069233	57072912	57069306	57070819	-	3	0	0	0
Chr12	57070673	57072912	57070893	57072787	-	0	0	1	0
Chr12	57498156	57498623	57498273	57498419	+	0	2	0	2
Chr12	57524028	57525115	57524092	57524279	+	0	6	0	0
Chr12	57533952	57534452	57534097	57534291	-	0	3	2	0
Chr12	57567125	57567618	57567213	57567493	+	0	0	0	1
Chr12	57749181	57749504	57749317	57749453	-	0	0	0	1
Chr12	67281909	67295156	67292776	67295032	+	0	0	0	4
Chr12	68820324	68824651	68820374	68824362	+	1	0	9	0
Chr12	68835828	68836749	68835984	68836671	+	0	4	0	0
Chr12	69251128	69262562	69256842	69257731	+	1	9	2	0
Chr12	69256696	69262562	69256842	69257731	+	0	0	0	1
Chr12	69530864	69532056	69530960	69532013	+	1	0	0	3
Chr12	69800208	69801721	69800337	69801608	+	9	52	5	23
Chr12	70278131	70311017	70285586	70294236	+	2	0	1	2
Chr12	88148287	88176319	88148504	88153290	+	2	0	0	1
Chr12	100204939	100205744	100205057	100205675	+	0	0	0	1
Chr12	103976917	103980962	103980072	103980892	+	0	0	1	0
Chr12	106999550	107000082	106999862	106999941	-	0	7	0	3
Chr12	108652271	108654410	108652417	108653037	-	1	9	0	10
Chr12	109216617	109216920	109216706	109216795	+	4	5	0	0
Chr12	109565118	109568863	109567167	109568769	-	0	0	0	2
Chr12	109907525	109908937	109907699	109908585	+	0	0	0	1
Chr12	110203863	110205680	110205514	110205594	+	0	0	0	2
Chr12	110292019	110296737	110292124	110296598	+	4	0	0	1
Chr12	111554157	111555919	111554217	111555882	-	0	13	4	8
Chr12	112075677	112078741	112078266	112078633	-	6	2	0	2
Chr12	112078187	112078741	112078266	112078633	-	0	0	0	1
Chr12	112200637	112204623	112203772	112204485	-	0	0	2	0
Chr12	112228646	112230822	112229880	112230686	-	0	6	0	0
Chr12	112229697	112231715	112229880	112230686	-	4	0	0	0
Chr12	113176839	113181058	113179026	113179142	-	0	0	0	1
Chr12	113267842	113269845	113267956	113268741	+	3	1	3	3
Chr12	116740344	116741094	116740521	116741035	+	10	0	1	2
Chr12	118019071	118020985	118019136	118019631	+	1	4	0	0
Chr12	118400658	118403517	118400754	118401758	+	0	0	1	0
Chr12	120142506	120142941	120142722	120142823	-	0	0	0	2
Chr12	120154969	120155719	120155430	120155591	-	121	97	82	58
Chr12	120177446	120178950	120178759	120178851	-	5	0	5	0
Chr12	120177683	120190400	120178759	120178851	-	0	1	0	1
Chr12	120183568	120184887	120183677	120184111	-	1	0	0	0
Chr12	120557281	120557682	120557466	120557545	+	11	3	2	5
Chr12	120557281	120560886	120557466	120557545	+	0	0	0	2
Chr12	120562944	120563943	120563070	120563346	+	0	0	1	0
Chr12	121221912	121222166	121221984	121222093	+	0	0	0	1
Chr12	121780871	121781192	121781006	121781082	-	0	0	0	1
Chr12	121894738	121903107	121899889	121903005	+	0	0	1	0
Chr12	122477840	122478292	122477958	122478205	-	0	2	0	3
Chr12	122483278	122483563	122483344	122483459	-	0	0	2	0
Chr12	122546175	122547969	122546674	122547414	+	1	0	0	0
Chr12	123165301	123166789	123165477	123166654	-	0	0	0	2
Chr12	123176687	123181210	123179990	123181162	-	0	2	0	0
Chr12	123498543	123499536	123498765	123499417	-	0	17	2	0
Chr12	123616510	123618837	123617872	123618668	+	0	0	0	1
Chr12	123617757	123618837	123617872	123618668	+	6	0	2	5
Chr12	123626424	123627156	123626493	123627043	-	1	0	0	0
Chr12	123639263	123652735	123651056	123652523	+	4	0	0	4
Chr12	123645454	123652735	123651056	123652523	+	0	0	0	3
Chr12	124426621	124430787	124426800	124429612	-	0	0	0	1
Chr12	124807760	124810289	124807927	124810173	-	0	0	4	1
Chr12	124952397	124954211	124953996	124954086	-	3	0	0	1
Chr12	124966792	124967218	124966878	124967122	-	9	4	1	0
Chr12	125124704	125125024	125124769	125124901	+	0	0	0	1
Chr12	128926358	128927154	128926454	128927104	+	0	6	0	1
Chr12	130812956	130827267	130821788	130827192	-	0	0	0	1
Chr12	130821688	130827267	130821788	130827192	-	2	1	2	4
Chr12	131929906	131932312	131930135	131932174	+	0	4	0	0
Chr12	131981488	131982478	131981596	131982092	+	0	3	0	0
Chr12	132037681	132038096	132037793	132037952	+	0	0	0	1
Chr12	132151257	132151820	132151368	132151483	+	0	3	0	0
Chr12	132507251	132508350	132507388	132508155	+	4	0	0	0
Chr12	132508152	132527988	132525823	132527952	+	0	0	0	2
Chr12	132525733	132527988	132525823	132527952	+	0	0	0	1
Chr12	132525733	132548032	132525823	132527952	+	0	0	6	0
Chr12	132572287	132582266	132572344	132572526	+	0	6	0	0
Chr12	132665301	132668939	132668737	132668810	-	0	0	0	2
Chr12	132668355	132668939	132668737	132668810	-	0	7	0	0
Chr12	132714857	132718120	132715036	132717438	+	0	0	0	1
Chr12	132734384	132735512	132734575	132735405	-	27	42	12	17
Chr12	132780797	132784307	132782493	132784163	-	0	0	0	1
Chr12	132782295	132784307	132782493	132784163	-	0	0	1	1
Chr13	19705661	19709599	19705831	19709541	-	0	0	0	1
Chr13	19851354	19852190	19851448	19851688	-	2	24	4	2
Chr13	19993062	19993919	19993564	19993825	+	0	5	1	1
Chr13	25319325	25338731	25319350	25320529	+	0	1	0	0
Chr13	32517856	32527532	32522270	32527407	-	0	0	0	1
Chr13	41252644	41261825	41260915	41261690	-	0	0	0	1
Chr13	50492650	50493534	50492761	50493471	+	0	2	0	2
Chr13	51727677	51755459	51751415	51755357	+	0	0	0	1
Chr13	52144690	52148469	52144891	52148414	-	0	0	0	1
Chr13	52417991	52434882	52427219	52433661	-	0	0	2	0
Chr13	52657531	52659249	52657622	52658098	+	0	1	0	0
Chr13	95611444	95612177	95611493	95612036	-	0	0	0	1
Chr13	99529466	99537863	99536737	99537738	+	0	5	0	0
Chr13	106557047	106559657	106557616	106559431	-	0	5	0	0
Chr13	110622215	110635588	110634595	110634671	+	0	7	0	0
Chr13	110634544	110635588	110634595	110634671	+	2	0	0	0
Chr13	113520615	113534240	113520733	113534044	+	0	1	1	0
Chr13	113520615	113539507	113520733	113534044	+	0	1	0	1
Chr13	113585773	113623286	113585849	113610995	+	0	0	0	1
Chr14	20403376	20403884	20403448	20403722	-	0	0	1	0
Chr14	21230318	21231072	21230366	21230957	-	0	0	4	0
Chr14	21263310	21268668	21263336	21268622	-	0	7	0	0
Chr14	21357196	21358427	21358002	21358314	-	0	3	0	0
Chr14	21357196	21361213	21358002	21358314	-	0	3	0	0
Chr14	21503172	21503577	21503291	21503505	-	0	0	0	1
Chr14	21503172	21503881	21503577	21503663	-	4	1	3	8
Chr14	22906194	22909595	22908380	22909482	-	0	0	3	0
Chr14	22906194	22911403	22908380	22909482	-	0	3	0	0
Chr14	22909482	22911403	22909595	22911327	-	0	1	0	3
Chr14	22926132	22926814	22926296	22926505	-	0	0	2	0
Chr14	22947170	22948013	22947239	22947600	-	0	0	0	2
Chr14	24211414	24211829	24211592	24211679	-	0	0	0	3
Chr14	24218132	24218431	24218215	24218383	-	6	0	0	0
Chr14	24266429	24268619	24268420	24268513	-	4	0	3	0
Chr14	30877571	30879485	30878944	30879422	+	0	0	0	1
Chr14	30877571	30880734	30878944	30879422	+	1	4	1	0
Chr14	30878810	30879485	30878944	30879422	+	0	8	4	3
Chr14	31127784	31172122	31133414	31133508	-	0	2	0	0
Chr14	31133237	31133675	31133414	31133508	-	0	0	0	1
Chr14	35007282	35008831	35008693	35008773	+	0	0	1	0
Chr14	39179090	39179462	39179246	39179323	+	0	1	11	5
Chr14	45096423	45096758	45096492	45096595	+	5	0	3	3
Chr14	49664625	49665163	49664674	49665106	-	7	8	1	4
Chr14	54784339	54784620	54784447	54784536	+	0	0	1	0
Chr14	55612018	55619312	55618134	55619181	+	0	0	0	1
Chr14	56585000	56636598	56634952	56636507	+	0	0	0	1
Chr14	58291634	58293138	58291707	58293065	-	2	0	0	0
Chr14	61721508	61721823	61721654	61721738	+	0	0	14	2
Chr14	64439095	64441453	64440266	64441384	+	0	0	0	1
Chr14	67691139	67693052	67692593	67692933	-	1	0	0	0
Chr14	73147794	73148094	73147876	73147966	+	1	0	0	0
Chr14	73147794	73148106	73147876	73147966	+	0	0	3	2
Chr14	73244643	73246175	73245696	73246072	+	0	23	4	6
Chr14	73858815	73860657	73858899	73860538	+	0	0	0	2
Chr14	73876997	73880176	73879305	73880054	+	0	0	0	1
Chr14	73958146	73961570	73958277	73958970	+	0	0	0	2
Chr14	74669648	74671483	74670126	74670761	-	0	1	0	0
Chr14	75732337	75735289	75734050	75735194	+	3	0	0	2
Chr14	76058641	76059373	76058674	76059326	+	0	8	0	0
Chr14	77464597	77465667	77464686	77465538	+	0	3	0	0
Chr14	95140658	95141748	95141187	95141682	-	14	17	5	8
Chr14	96521005	96528006	96527539	96527952	+	0	0	2	0
Chr14	99522132	99536088	99522240	99536014	-	0	0	0	1
Chr14	99914178	99914697	99914304	99914565	+	4	0	0	2
Chr14	101991526	101995300	101995096	101995180	+	0	0	0	1
Chr14	102002536	102002965	102002703	102002791	+	6	0	0	0
Chr14	102040235	102040673	102040410	102040597	+	2	8	9	5
Chr14	103498501	103500200	103498528	103500155	+	2	6	0	1
Chr14	105348492	105368515	105368147	105368458	+	3	0	0	0
Chr14	105450057	105450324	105450184	105450260	+	0	0	2	0
Chr14	105450057	105464147	105450184	105450260	+	0	0	1	0
Chr15	22927905	22932340	22928028	22932222	+	3	0	0	0
Chr15	25405460	25409207	25408684	25409087	-	0	0	1	0
Chr15	25405460	25411971	25408684	25409087	-	2	10	1	0
Chr15	25405460	25415842	25408684	25409087	-	1	0	2	0
Chr15	28236962	28263169	28260970	28262917	-	0	0	0	1
Chr15	28260776	28263169	28260970	28262917	-	0	6	0	0
Chr15	40407635	40407990	40407812	40407938	+	0	0	0	1
Chr15	40809118	40813811	40809970	40810070	+	1	0	0	0
Chr15	41834739	41835223	41834893	41834969	+	4	0	0	0
Chr15	42634855	42638812	42638087	42638699	+	0	3	0	0
Chr15	42638025	42638812	42638087	42638699	+	0	0	0	1
Chr15	43385790	43386330	43385956	43386205	+	0	0	0	1
Chr15	43446386	43447485	43446590	43446765	-	0	2	0	0
Chr15	50300788	50301368	50300902	50301220	-	1	0	0	2
Chr15	50300788	50309798	50300902	50301220	-	0	2	0	0
Chr15	51451644	51453641	51451697	51453549	-	0	0	0	5
Chr15	52593577	52611255	52610383	52611129	-	0	0	0	1
Chr15	58013857	58014281	58013994	58014176	-	0	0	2	0
Chr15	58912562	58913696	58912610	58913498	-	1	2	0	4
Chr15	58912562	58916999	58912610	58913498	-	0	0	0	9
Chr15	60382341	60386086	60382441	60386027	-	0	0	3	0
Chr15	65534348	65535834	65534434	65535720	+	0	0	0	2
Chr15	65551675	65556903	65554960	65556738	+	0	3	0	1
Chr15	65551675	65558731	65554960	65556738	+	0	6	0	2
Chr15	65551675	65564342	65554960	65556738	+	0	1	0	1
Chr15	65702304	65706224	65703008	65706090	-	0	2	0	0
Chr15	66349059	66349437	66349123	66349314	-	1	0	0	0
Chr15	69436137	69436722	69436261	69436563	+	1	0	4	1
Chr15	72345445	72346325	72345550	72346234	-	1	0	0	0
Chr15	72544819	72572165	72555363	72555851	+	0	0	0	1
Chr15	72555270	72561549	72555363	72555851	+	0	0	1	1
Chr15	73587523	73592137	73587618	73591965	-	0	0	0	1
Chr15	74572861	74573204	74572933	74573131	+	3	8	2	6
Chr15	75854385	75883424	75879188	75883365	+	8	0	0	0
Chr15	75876186	75883424	75879188	75883365	+	0	1	0	0
Chr15	76225848	76295737	76292513	76292618	-	0	0	0	1
Chr15	76274411	76295737	76292513	76292618	-	1	7	0	2
Chr15	76283756	76295737	76292513	76292618	-	0	1	0	3
Chr15	76287845	76292700	76292513	76292618	-	0	0	0	1
Chr15	76292430	76292700	76292513	76292618	-	0	0	0	1
Chr15	76292430	76295737	76292513	76292618	-	0	0	0	3
Chr15	78490421	78490761	78490526	78490618	+	0	4	0	0
Chr15	80158059	80168316	80168149	80168263	+	0	4	0	0
Chr15	84680712	84691644	84687774	84691534	-	0	3	1	0
Chr15	84797868	84799977	84798045	84798314	+	0	0	2	0
Chr15	85113872	85115487	85114037	85115438	+	0	0	2	8
Chr15	89261584	89261878	89261741	89261820	+	0	0	0	1
Chr15	89888520	89889140	89888632	89889048	-	3	0	0	0
Chr15	90909326	90913755	90913406	90913613	+	0	4	0	0
Chr15	90947795	90948794	90948283	90948653	+	0	0	3	1
Chr15	90980883	90981981	90981669	90981747	-	0	0	0	1
Chr15	90981498	90981981	90981669	90981747	-	0	0	0	1
Chr15	92978233	92979283	92978383	92979134	+	0	5	0	0
Chr15	100048856	100199423	100155320	100199317	-	0	0	2	0
Chr15	100132006	100199423	100155320	100199317	-	0	0	0	1
Chr15	100152611	100199423	100155320	100199317	-	1	4	1	0
Chr15	101272763	101274681	101274495	101274591	-	0	0	3	0
Chr16	227241	228402	227336	228332	-	1	0	0	0
Chr16	297055	298251	297226	297721	-	0	1	0	0
Chr16	533945	536142	533998	536028	+	16	36	45	0
Chr16	574065	576254	575970	576133	+	1	0	0	0
Chr16	647416	647884	647544	647782	+	3	0	0	0
Chr16	796716	797751	796861	796960	+	0	4	0	0
Chr16	1461404	1465338	1461470	1461602	-	1	0	0	0
Chr16	1614638	1632365	1626166	1632211	+	0	0	0	1
Chr16	1625972	1632365	1626166	1632211	+	0	0	0	2
Chr16	1625972	1641187	1626166	1632211	+	1	0	0	0
Chr16	1724556	1729578	1729208	1729486	+	0	4	4	3
Chr16	1809237	1809833	1809382	1809753	-	4	0	2	3
Chr16	1974375	1975262	1974847	1974927	+	0	0	1	0
Chr16	2056195	2058873	2056244	2056643	+	0	2	0	0
Chr16	2062496	2063053	2062600	2062971	+	4	0	0	0
Chr16	2097147	2097984	2097241	2097318	-	3	0	0	0
Chr16	2243045	2243439	2243224	2243317	-	0	0	0	2
Chr16	2695934	2697997	2696043	2697905	+	0	0	0	1
Chr16	3026062	3026288	3026166	3026250	+	0	0	1	0
Chr16	3026364	3026781	3026413	3026515	+	5	0	0	0
Chr16	3129247	3129653	3129310	3129460	-	0	11	0	3
Chr16	3672699	3675397	3674494	3675323	-	2	0	0	0
Chr16	3675323	3689137	3679790	3685995	-	0	0	2	0
Chr16	3679718	3689137	3679790	3685995	-	0	7	3	0
Chr16	3791980	3793626	3792094	3793385	-	0	2	0	0
Chr16	4332214	4333519	4332452	4333346	+	5	1	6	1
Chr16	4474092	4474792	4474166	4474553	-	0	1	0	0
Chr16	4671390	4673657	4672516	4673497	+	0	0	1	0
Chr16	4811169	4812248	4811802	4812085	-	0	3	0	0
Chr16	4814536	4817697	4814647	4817597	-	0	0	5	0
Chr16	5027134	5028185	5027198	5027277	-	3	2	0	0
Chr16	5079747	5081056	5079807	5080945	+	0	0	0	1
Chr16	8801798	8804843	8801910	8804766	+	0	0	0	1
Chr16	8858349	8859335	8858472	8859170	-	0	0	0	3
Chr16	8919030	8930397	8919139	8920358	-	0	0	1	0
Chr16	8920358	8930397	8921295	8923353	-	0	4	0	2
Chr16	11846500	11847806	11846843	11847667	-	3	0	0	0
Chr16	11894953	11898035	11896785	11897839	-	2	2	0	1
Chr16	14627105	14627336	14627187	14627268	-	2	0	4	1
Chr16	18797924	18798834	18798044	18798700	-	0	0	0	1
Chr16	19073920	19075860	19074035	19075720	+	0	0	0	2
Chr16	19616113	19616808	19616191	19616685	+	3	6	0	0
Chr16	19616113	19626223	19616191	19616685	+	0	7	0	0
Chr16	21971524	21980700	21976243	21980546	+	1	0	0	0
Chr16	22266389	22266876	22266524	22266687	+	0	0	0	5
Chr16	22273625	22280376	22273750	22280197	+	0	0	1	0
Chr16	22349278	22349849	22349443	22349700	-	0	0	0	2
Chr16	25140170	25151615	25140247	25151553	+	0	0	0	1
Chr16	28166507	28169909	28166585	28169749	-	0	0	0	1
Chr16	28488590	28489386	28488662	28489289	-	1	0	0	0
Chr16	28843949	28844551	28844101	28844229	-	0	8	0	0
Chr16	28955977	28956337	28956058	28956150	+	1	0	0	0
Chr16	30728965	30729572	30729231	30729369	+	0	3	0	0
Chr16	30768618	30768987	30768736	30768837	+	0	0	0	2
Chr16	30771832	30772190	30771973	30772088	+	0	0	2	0
Chr16	31297513	31297954	31297654	31297744	+	1	0	3	4
Chr16	31722625	31723353	31722752	31723257	+	15	25	1	14
Chr16	46680670	46683606	46681500	46682078	-	0	3	0	0
Chr16	47463898	47515601	47511772	47515520	+	0	7	0	0
Chr16	47497398	47515601	47511772	47515520	+	1	0	0	1
Chr16	48347506	48348290	48347714	48348099	+	0	6	0	0
Chr16	50078740	50084651	50084027	50084133	+	0	0	0	1
Chr16	56385918	56389375	56386022	56389184	-	0	0	1	1
Chr16	57754929	57756472	57755917	57755991	+	1	0	0	0
Chr16	58670112	58672243	58671244	58672095	-	0	0	2	0
Chr16	58670112	58676346	58676054	58676288	-	2	0	0	0
Chr16	58675939	58676346	58676054	58676288	-	18	11	7	4
Chr16	58716013	58719255	58718300	58718526	-	0	0	1	0
Chr16	58718195	58719255	58718300	58718526	-	9	0	0	0
Chr16	66608308	66610003	66608464	66609434	+	0	0	1	0
Chr16	66805776	66806026	66805826	66805911	-	0	0	1	1
Chr16	67192760	67197646	67192870	67193008	+	0	0	0	3
Chr16	67544298	67544830	67544431	67544694	+	0	0	0	1
Chr16	67738012	67744455	67738035	67744287	-	0	0	0	1
Chr16	67868339	67868599	67868411	67868500	+	1	0	0	0
Chr16	68053563	68054617	68053655	68054573	+	3	2	0	5
Chr16	68053563	68056424	68053655	68054573	+	0	6	0	0
Chr16	69370482	69372355	69370629	69372268	-	9	16	8	3
Chr16	69646516	69655799	69646578	69647027	+	0	1	0	0
Chr16	70355484	70356247	70355535	70356111	+	0	0	2	0
Chr16	70463168	70463774	70463272	70463622	+	0	0	1	1
Chr16	70466131	70471352	70468968	70469151	+	0	0	0	4
Chr16	70468848	70469323	70468968	70469151	+	0	9	0	1
Chr16	70541668	70544533	70541834	70544437	+	0	4	0	0
Chr16	70556178	70557029	70556334	70556885	+	0	0	3	0
Chr16	71920738	71921453	71920822	71921342	+	3	1	3	3
Chr16	72617182	72617553	72617234	72617338	-	0	0	1	1
Chr16	74459681	74463479	74462630	74463355	-	0	0	0	2
Chr16	74885652	74886396	74885795	74886269	-	0	6	0	0
Chr16	74908907	74909917	74909657	74909821	-	3	0	0	0
Chr16	74915869	74916259	74915994	74916126	-	0	0	2	1
Chr16	74948518	74965822	74951543	74956474	-	0	0	0	1
Chr16	75104783	75106571	75104889	75106481	+	0	0	2	0
Chr16	84181941	84183333	84182058	84182201	-	0	0	0	2
Chr16	87417459	87418901	87417742	87418846	-	0	6	0	0
Chr16	87726764	87730644	87726924	87730551	-	0	1	2	2
Chr16	88033108	88038011	88033245	88035322	+	3	0	0	0
Chr16	88671276	88673759	88671465	88671812	+	0	0	0	1
Chr16	89530682	89550609	89530808	89531903	+	0	0	5	0
Chr16	89749729	89762022	89749902	89752137	-	0	0	0	1
Chr16	89782858	89783102	89782918	89783006	-	0	0	0	3
Chr16	89791402	89792547	89791536	89791926	-	1	2	1	0
Chr16	89803258	89805392	89803341	89805279	-	0	2	0	0
Chr16	89892192	89896083	89895137	89895989	+	0	0	0	1
Chr16	89895082	89896083	89895137	89895989	+	0	5	0	0
Chr16	89977638	89978878	89977802	89978809	+	2	0	0	4
Chr16	89977677	89978878	89977802	89978809	+	9	0	0	2
Chr16	89978809	89980336	89978878	89980241	+	0	0	0	1
Chr17	769868	776988	769955	770043	-	0	0	0	1
Chr17	1091664	1100735	1091850	1100636	-	0	0	3	0
Chr17	1474811	1484303	1483725	1484147	-	0	0	0	1
Chr17	1636708	1637062	1636855	1636940	-	0	0	2	0
Chr17	1842802	1844686	1843998	1844577	+	2	0	0	0
Chr17	3814321	3816270	3814483	3816115	-	0	0	0	1
Chr17	3940970	3942731	3941654	3942605	-	0	0	2	0
Chr17	4173353	4179877	4173444	4173908	-	1	0	0	0
Chr17	4206320	4209947	4206486	4207932	-	3	0	0	0
Chr17	4206320	4235890	4206486	4207932	-	0	0	1	0
Chr17	4550057	4552626	4552292	4552450	-	0	4	0	0
Chr17	4938022	4938602	4938253	4938338	-	0	0	3	0
Chr17	5460938	5462546	5461109	5462318	-	0	3	3	4
Chr17	7228968	7230430	7229045	7229134	-	0	0	0	1
Chr17	7313028	7314597	7314403	7314487	-	5	0	0	0
Chr17	7499038	7509632	7509190	7509531	+	0	0	1	0
Chr17	7577343	7577916	7577706	7577826	+	0	2	0	0
Chr17	7592693	7593181	7592894	7592983	-	0	0	1	0
Chr17	10651511	10652563	10651668	10652419	-	0	0	0	1
Chr17	16313546	16317908	16316712	16317774	+	4	0	0	0
Chr17	17075709	17078076	17075787	17078010	+	0	2	0	2
Chr17	17866295	17869473	17866924	17869339	-	0	1	0	0
Chr17	18021122	18026416	18021238	18021744	-	0	0	0	1
Chr17	18340042	18340813	18340255	18340731	-	0	2	2	0
Chr17	18340042	18348440	18340255	18340731	-	0	1	0	0
Chr17	18340042	18353817	18340255	18340731	-	0	2	0	0
Chr17	19309884	19312144	19309997	19312051	+	0	2	0	0
Chr17	19309884	19329647	19309997	19312051	+	3	0	0	0
Chr17	19542392	19549677	19546503	19547984	+	1	0	0	0
Chr17	19542392	19551468	19546503	19547984	+	0	0	0	1
Chr17	19560187	19560493	19560296	19560417	+	0	0	0	1
Chr17	19931804	19936430	19931978	19936285	-	0	0	3	0
Chr17	27765534	27766588	27765716	27766509	-	11	5	3	0
Chr17	28578217	28578528	28578292	28578372	-	0	0	0	1
Chr17	30843912	30844916	30844039	30844834	+	0	0	0	1
Chr17	32173830	32175362	32173912	32175318	+	2	5	0	0
Chr17	35817239	35817755	35817317	35817715	+	0	0	0	1
Chr17	36509061	36511455	36510917	36511364	-	11	21	3	8
Chr17	36525227	36528202	36527699	36528063	-	0	2	0	0
Chr17	37193373	37200483	37200183	37200426	-	0	0	0	1
Chr17	37200138	37200483	37200183	37200426	-	0	0	3	0
Chr17	38361710	38377842	38361775	38364751	+	0	0	0	1
Chr17	39708320	39710481	39710201	39710339	+	5	0	0	0
Chr17	39725048	39725402	39725204	39725326	+	0	0	0	2
Chr17	40032648	40033456	40033206	40033344	-	0	0	0	1
Chr17	41827425	41828952	41827626	41828789	-	0	0	0	1
Chr17	41994869	41996424	41994944	41996310	-	0	0	0	1
Chr17	41994869	41997239	41994944	41996310	-	0	0	1	0
Chr17	42022398	42022640	42022472	42022564	+	0	0	1	1
Chr17	42322281	42323625	42323354	42323572	-	0	0	2	0
Chr17	42329409	42329776	42329647	42329746	-	0	0	0	2
Chr17	42837648	42838205	42837697	42838092	+	0	4	0	0
Chr17	42837648	42839380	42839012	42839111	+	0	0	0	2
Chr17	43049120	43050190	43049194	43050061	-	0	0	0	1
Chr17	43177935	43180817	43177998	43179393	+	0	1	0	0
Chr17	43816037	43824005	43816079	43818045	-	0	4	0	0
Chr17	44154552	44155411	44154664	44154852	+	0	0	2	0
Chr17	44154555	44155411	44154664	44154852	+	3	6	7	4
Chr17	44211605	44218296	44211747	44211872	-	0	0	1	0
Chr17	44736829	44738424	44736866	44738378	+	0	2	0	0
Chr17	45120324	45121372	45121130	45121210	-	4	0	2	1
Chr17	46169530	46172232	46169605	46170854	-	1	0	0	1
Chr17	47663088	47668410	47665158	47668185	+	0	0	4	3
Chr17	47664158	47668410	47665158	47668185	+	0	9	0	0
Chr17	47670701	47674782	47670832	47673017	+	0	0	0	2
Chr17	47676408	47677127	47676491	47677019	+	0	0	0	1
Chr17	48112030	48113401	48112111	48112573	+	2	3	0	11
Chr17	48848063	48849377	48848166	48848321	+	0	0	0	6
Chr17	49025617	49026517	49025666	49026465	+	0	7	0	2
Chr17	50736959	50738199	50737026	50737286	+	3	0	0	0
Chr17	50736959	50740345	50737026	50737286	+	0	0	0	1
Chr17	50741101	50741731	50741246	50741656	+	0	8	0	0
Chr17	51031680	51056482	51041651	51047374	-	0	0	0	1
Chr17	51041500	51056482	51041651	51047374	-	0	0	0	1
Chr17	51041500	51079704	51041651	51047374	-	0	2	0	0
Chr17	54913747	54939020	54937226	54938923	+	0	3	1	0
Chr17	54930072	54939020	54937226	54938923	+	0	3	0	0
Chr17	54938923	54947312	54939020	54947260	+	0	4	0	4
Chr17	56895342	56899180	56895604	56895925	-	0	0	0	3
Chr17	57114458	57116261	57114636	57116110	+	0	0	1	0
Chr17	59570517	59573235	59570663	59573115	+	0	0	0	2
Chr17	59586152	59588053	59586233	59587895	+	0	0	0	1
Chr17	59735337	59738947	59735473	59738836	+	0	0	0	3
Chr17	59936214	59936541	59936277	59936463	+	3	7	3	2
Chr17	61744431	61780401	61776562	61780260	-	0	4	0	0
Chr17	61776400	61780401	61776562	61780260	-	4	4	0	1
Chr17	61881006	61897739	61897583	61897667	-	0	0	1	0
Chr17	61984170	61985090	61984865	61984999	-	0	6	2	1
Chr17	63578469	63579943	63579448	63579824	+	2	0	1	0
Chr17	63578469	63589237	63579448	63579824	+	0	0	0	3
Chr17	63751939	63752799	63752107	63752319	-	0	0	0	2
Chr17	63805070	63806654	63805175	63806534	+	0	4	0	0
Chr17	64519320	64526200	64525882	64526070	+	1	0	0	0
Chr17	67874816	67894165	67893725	67894033	+	0	0	0	1
Chr17	73202999	73203793	73203146	73203631	+	3	0	0	0
Chr17	75242335	75243570	75243166	75243446	-	0	0	3	0
Chr17	75690670	75691531	75690772	75691393	+	0	3	0	0
Chr17	75812111	75812585	75812288	75812454	+	0	0	0	1
Chr17	75812111	75813878	75812288	75812454	+	3	0	0	0
Chr17	75912191	75920429	75917850	75917930	-	0	4	0	0
Chr17	75917731	75918269	75917850	75917930	-	0	3	0	1
Chr17	75919667	75920429	75919874	75920006	-	0	2	0	0
Chr17	75932994	75938232	75937593	75938146	-	0	0	0	1
Chr17	75937565	75938232	75937593	75938146	-	11	0	6	2
Chr17	75950773	75955947	75955681	75955827	-	0	0	0	1
Chr17	76312869	76313891	76313016	76313820	-	17	19	8	20
Chr17	76558373	76559043	76558600	76558944	+	0	0	1	0
Chr17	76924965	76926730	76925097	76926596	+	0	0	0	1
Chr17	78202498	78202751	78202603	78202702	+	1	0	0	0
Chr17	78414878	78419675	78415027	78419545	+	0	0	1	0
Chr17	78414878	78419725	78415027	78419545	+	0	6	0	0
Chr17	80048582	80050283	80049989	80050063	+	0	5	0	0
Chr17	80049905	80050283	80049989	80050063	+	0	0	3	0
Chr17	80136003	80138280	80136131	80136227	-	0	0	0	1
Chr17	80891719	80893865	80892869	80893706	+	0	0	1	0
Chr17	81053667	81057967	81053743	81057880	+	6	0	0	1
Chr17	81206743	81207239	81206871	81207124	-	5	3	0	0
Chr17	81604547	81608822	81604727	81606690	-	0	0	4	0
Chr17	81716008	81717861	81717491	81717756	+	0	0	0	1
Chr17	82053867	82054975	82054049	82054509	+	8	0	0	0
Chr17	82157747	82194139	82193830	82193981	-	0	3	0	0
Chr17	82183773	82195364	82193830	82193981	-	0	0	0	3
Chr17	82193755	82194139	82193830	82193981	-	3	0	2	0
Chr17	82193755	82201952	82193830	82193981	-	0	0	1	0
Chr17	82459991	82468896	82460072	82468763	+	0	0	0	1
Chr17	82563353	82568201	82563548	82568053	+	0	4	5	7
Chr17	82625388	82631022	82625483	82627203	-	0	0	0	1
Chr17	82718905	82720363	82719057	82720271	+	0	2	0	0
Chr17	82889667	82893632	82889697	82893546	+	0	0	0	1
Chr17	82900650	82903478	82900731	82903404	+	0	2	0	0
Chr17	82905935	82911789	82907821	82909284	+	0	5	0	3
Chr17	83035034	83048785	83048570	83048668	-	0	0	0	4
Chr17	83048470	83048785	83048570	83048668	-	0	0	0	3
Chr18	693881	694334	693908	694247	-	0	0	2	2
Chr18	9931809	9937066	9936213	9936985	+	0	0	1	2
Chr18	12009882	12014373	12012215	12014264	+	0	0	2	0
Chr18	12351084	12360051	12351210	12351305	-	0	0	0	1
Chr18	12420324	12421629	12420493	12421539	+	0	5	0	0
Chr18	22992747	22993847	22993639	22993720	+	0	0	0	1
Chr18	23524129	23524482	23524174	23524428	+	1	0	2	1
Chr18	46815311	46821072	46815349	46820932	-	2	2	3	0
Chr18	46815311	46846841	46815349	46820932	-	1	0	0	0
Chr18	46946056	46946923	46946275	46946853	+	3	6	4	12
Chr18	70127501	70128546	70127741	70128357	-	0	4	0	0
Chr18	79448781	79451816	79451126	79451675	+	3	0	0	0
Chr18	79450953	79451816	79451126	79451675	+	1	2	0	0
Chr18	79695224	79697988	79696070	79697859	+	2	0	2	0
Chr18	79695224	79704917	79696070	79697859	+	3	0	0	0
Chr18	79728906	79736521	79729069	79736354	+	0	0	1	0
Chr19	311844	313643	311939	312190	-	7	2	2	0
Chr19	325634	327989	326598	327132	-	0	0	1	0
Chr19	334399	336173	334542	336082	-	3	6	0	0
Chr19	430683	440932	436431	436629	-	0	0	2	0
Chr19	1105185	1106459	1105510	1105657	+	4	0	0	0
Chr19	1218416	1219413	1218500	1219323	+	8	10	7	2
Chr19	1218416	1223172	1218500	1219323	+	0	0	0	1
Chr19	1619110	1622415	1622223	1622312	-	0	5	0	0
Chr19	2040133	2046691	2046468	2046603	-	2	0	0	0
Chr19	2046366	2050947	2046468	2046603	-	4	0	0	0
Chr19	2137010	2138714	2137807	2138618	-	0	0	0	1
Chr19	2137726	2138714	2137807	2138618	-	15	8	16	5
Chr19	2213538	2214596	2213640	2213848	+	2	0	0	0
Chr19	2271384	2271954	2271530	2271781	+	0	0	0	3
Chr19	2765185	2769091	2767686	2768968	-	0	0	0	1
Chr19	3019282	3019773	3019463	3019698	-	5	0	0	0
Chr19	3660965	3662001	3661083	3661870	-	4	26	8	7
Chr19	4094452	4095449	4094498	4095387	-	1	0	0	0
Chr19	4354948	4355173	4355021	4355096	+	0	0	3	0
Chr19	4497957	4498915	4498031	4498305	+	0	0	1	0
Chr19	4941527	4941931	4941628	4941744	+	10	10	14	11
Chr19	4941527	4950996	4944255	4944342	+	0	0	3	0
Chr19	4944131	4947211	4944255	4944342	+	0	0	1	0
Chr19	5016256	5041251	5040011	5041136	+	0	2	0	0
Chr19	5039835	5041251	5040011	5041136	+	7	0	0	2
Chr19	5039835	5047669	5040011	5041136	+	0	0	0	1
Chr19	5604582	5604936	5604695	5604786	-	1	0	3	0
Chr19	5641593	5641946	5641658	5641739	+	0	0	22	1
Chr19	5653114	5653420	5653264	5653337	+	0	0	1	2
Chr19	5707059	5713253	5707143	5707696	-	0	0	0	2
Chr19	6453980	6454717	6454475	6454558	-	0	0	1	0
Chr19	6454322	6454717	6454475	6454558	-	0	0	0	1
Chr19	9656546	9659467	9658135	9659378	-	0	3	0	1
Chr19	9656546	9660874	9658135	9659378	-	1	0	0	0
Chr19	9658008	9659467	9658135	9659378	-	0	2	1	0
Chr19	9828326	9828675	9828393	9828591	+	0	0	0	1
Chr19	9828591	9828874	9828675	9828836	+	2	0	4	0
Chr19	10107504	10108134	10107606	10107803	+	0	0	0	1
Chr19	10146350	10151847	10151545	10151749	-	0	0	0	1
Chr19	10154292	10155056	10154773	10154904	-	0	0	0	7
Chr19	10173089	10173905	10173174	10173870	-	0	1	0	0
Chr19	10258221	10258685	10258328	10258412	+	15	0	7	9
Chr19	10356567	10359302	10356718	10357763	-	2	0	0	0
Chr19	10701949	10702254	10702018	10702115	+	4	0	0	0
Chr19	10701949	10713040	10712867	10712952	+	1	0	3	0
Chr19	10707301	10713040	10712867	10712952	+	0	0	0	2
Chr19	10795371	10798572	10797518	10798485	+	0	0	0	1
Chr19	10904950	10909207	10908145	10909102	+	0	0	2	0
Chr19	10908038	10909207	10908145	10909102	+	0	3	2	0
Chr19	11010380	11013112	11010531	11012948	+	0	0	0	1
Chr19	11546674	11546969	11546741	11546831	+	0	0	0	1
Chr19	12672846	12673316	12673116	12673201	+	0	1	2	2
Chr19	12679456	12680325	12679922	12680160	-	0	4	1	4
Chr19	12701597	12720990	12715169	12715242	-	0	0	0	1
Chr19	12710620	12711613	12710773	12711295	-	0	4	3	0
Chr19	12714820	12715538	12715169	12715242	-	1	0	0	2
Chr19	12714820	12715739	12715169	12715242	-	1	2	0	2
Chr19	12772189	12773044	12772680	12772779	-	0	5	0	0
Chr19	12928341	12928847	12928457	12928534	-	46	17	17	16
Chr19	13115625	13116052	13115768	13115996	-	0	0	4	0
Chr19	13135199	13136405	13136153	13136231	+	0	0	0	1
Chr19	13808835	13809220	13808984	13809069	+	6	2	0	2
Chr19	13923332	13923811	13923606	13923694	+	0	0	1	0
Chr19	13927892	13928188	13928030	13928123	+	0	0	4	2
Chr19	14039507	14039910	14039665	14039752	+	0	0	0	2
Chr19	14479411	14480778	14480485	14480592	-	0	1	0	0
Chr19	14563981	14564287	14564097	14564181	+	0	2	0	0
Chr19	15368234	15370179	15368322	15370145	-	0	0	3	0
Chr19	16088026	16089120	16088097	16089044	+	0	0	1	0
Chr19	17058548	17062779	17060092	17062697	-	0	0	0	1
Chr19	17159394	17163122	17162466	17162987	+	0	0	0	1
Chr19	17162349	17163122	17162466	17162987	+	0	0	0	3
Chr19	17271596	17275825	17274024	17274106	+	0	1	0	0
Chr19	17276494	17276909	17276624	17276822	+	43	55	40	39
Chr19	17338364	17338741	17338451	17338538	+	0	0	2	0
Chr19	18162966	18163388	18163147	18163262	+	0	0	0	1
Chr19	18436683	18437105	18436877	18436972	-	5	0	0	0
Chr19	18537600	18538433	18537773	18538215	-	11	10	5	5
Chr19	18537600	18538436	18537773	18538215	-	25	47	8	15
Chr19	18539370	18539720	18539459	18539550	-	13	2	19	6
Chr19	18850687	18851129	18850868	18851049	+	0	0	0	1
Chr19	18938352	18938884	18938484	18938727	-	0	0	0	1
Chr19	19196965	19197621	19197046	19197185	+	0	0	0	2
Chr19	19198106	19199234	19198232	19198656	+	4	1	5	4
Chr19	19335717	19336187	19335735	19336121	+	5	1	2	0
Chr19	19335717	19354445	19335735	19336121	+	0	0	2	0
Chr19	19492305	19492712	19492438	19492580	+	0	0	0	1
Chr19	19526181	19527770	19527352	19527700	+	2	0	0	0
Chr19	19636916	19642051	19640360	19640445	-	0	1	0	0
Chr19	19640084	19640571	19640360	19640445	-	3	0	1	1
Chr19	21098184	21098910	21098311	21098811	+	2	2	2	1
Chr19	21405128	21405856	21405255	21405757	+	3	1	0	0
Chr19	23662113	23663158	23662209	23663031	-	1	3	0	1
Chr19	32643122	32643631	32643352	32643430	-	2	0	0	0
Chr19	34194477	34196763	34194641	34196633	+	0	0	0	1
Chr19	34443843	34445121	34443911	34444999	+	2	3	0	1
Chr19	35729158	35730462	35729296	35729966	+	0	0	2	0
Chr19	35762018	35762356	35762146	35762252	+	0	1	1	1
Chr19	36607551	36610742	36607622	36609901	+	0	0	0	1
Chr19	36694801	36712867	36712512	36712780	+	1	0	0	0
Chr19	36712385	36712867	36712512	36712780	+	5	0	0	0
Chr19	37583970	37586745	37584097	37586667	-	0	0	1	0
Chr19	38917723	38918813	38918008	38918093	-	10	1	4	4
Chr19	38922237	38926300	38922267	38926204	-	0	8	0	0
Chr19	39392463	39393637	39392522	39393552	+	0	0	0	2
Chr19	39457674	39471503	39469172	39469261	+	0	0	0	1
Chr19	39836555	39837843	39836668	39837710	-	0	0	0	1
Chr19	40237968	40240110	40238973	40240044	-	1	6	6	0
Chr19	40583397	40583717	40583485	40583600	+	0	0	0	1
Chr19	40623603	40624082	40623732	40623935	+	0	0	3	1
Chr19	40705095	40705447	40705181	40705324	-	1	11	2	1
Chr19	42335034	42335385	42335215	42335296	+	5	0	0	0
Chr19	45187330	45187740	45187441	45187586	+	4	0	4	2
Chr19	45258988	45263367	45263166	45263318	+	0	0	0	1
Chr19	45263112	45263367	45263166	45263318	+	21	27	41	63
Chr19	45263112	45266281	45263166	45263318	+	1	0	0	0
Chr19	45277922	45278615	45278042	45278515	+	0	0	3	1
Chr19	45277922	45280734	45280483	45280574	+	0	0	0	1
Chr19	45280373	45280734	45280483	45280574	+	0	0	0	2
Chr19	45355664	45357699	45357543	45357629	-	1	0	0	0
Chr19	45357269	45357699	45357543	45357629	-	0	3	2	0
Chr19	45368629	45369147	45368992	45369069	-	0	0	0	2
Chr19	45854174	45854507	45854240	45854390	-	2	0	1	2
Chr19	47040443	47041125	47040550	47040977	+	0	0	1	0
Chr19	47040443	47042904	47040550	47040977	+	4	0	0	3
Chr19	47258329	47264946	47264686	47264772	+	0	7	0	0
Chr19	47264602	47264946	47264686	47264772	+	39	2	14	17
Chr19	47416651	47417350	47416702	47416803	-	8	14	0	9
Chr19	48127276	48128020	48127348	48127909	-	4	6	0	3
Chr19	48143542	48143963	48143599	48143882	-	0	5	0	0
Chr19	48161371	48162351	48161507	48162261	-	0	0	1	0
Chr19	48911148	48913564	48913196	48913473	+	0	0	1	0
Chr19	48913010	48913564	48913196	48913473	+	0	0	0	2
Chr19	48955547	48955833	48955599	48955686	+	1	0	0	0
Chr19	48970545	48971023	48970709	48970927	-	0	0	0	3
Chr19	49004276	49007368	49007147	49007301	+	0	0	2	1
Chr19	49007017	49007368	49007147	49007301	+	3	0	0	0
Chr19	49355147	49355419	49355206	49355302	-	1	0	0	0
Chr19	49447023	49447908	49447099	49447337	-	0	0	2	0
Chr19	49828448	49829090	49828547	49828969	+	4	3	6	3
Chr19	49862043	49862463	49862105	49862184	-	0	1	0	0
Chr19	50398847	50399484	50399053	50399370	+	0	9	0	1
Chr19	50398850	50399484	50399053	50399370	+	10	13	3	2
Chr19	51581390	51581882	51581517	51581786	+	0	0	1	0
Chr19	51896471	51900294	51896567	51896851	-	0	0	2	0
Chr19	52076043	52077084	52076172	52076957	-	0	0	1	1
Chr19	52616717	52635153	52616841	52618935	-	0	0	0	1
Chr19	53074139	53091720	53091553	53091636	-	0	3	0	0
Chr19	53091412	53091720	53091553	53091636	-	0	0	5	1
Chr19	53148680	53149367	53148812	53149240	-	0	2	0	0
Chr19	55047386	55056808	55047488	55048045	-	0	0	0	1
Chr19	55098783	55103568	55098858	55098950	-	4	0	3	1
Chr19	55098783	55112795	55112585	55112664	-	0	1	0	0
Chr19	55140882	55141920	55140960	55141185	-	0	2	0	0
Chr19	55245119	55245678	55245185	55245264	-	5	11	4	1
Chr19	55294016	55294397	55294133	55294213	+	0	0	0	1
Chr19	55341793	55342851	55342046	55342214	+	0	0	0	1
Chr19	57633712	57634061	57633905	57634022	+	1	0	0	0
Chr19	58392975	58393487	58393185	58393358	+	6	0	0	3
Chr2	9535833	9536828	9535922	9536697	-	0	1	0	0
Chr2	10141853	10142375	10141954	10142254	+	0	0	1	0
Chr2	10577635	10603157	10602874	10603077	-	0	0	2	0
Chr2	10644319	10668723	10657891	10659171	-	0	0	0	1
Chr2	15595144	15595553	15595196	15595489	+	5	2	0	2
Chr2	24554388	24556055	24554573	24556014	+	4	0	4	1
Chr2	24554388	24584560	24554573	24556014	+	5	11	1	4
Chr2	27470927	27472362	27471095	27472249	-	1	2	0	3
Chr2	27477216	27484266	27483937	27484226	-	0	2	0	0
Chr2	27634845	27635234	27634924	27635139	+	1	0	0	0
Chr2	28776850	28779039	28776982	28778808	+	0	0	0	2
Chr2	28850327	28865119	28851298	28852407	-	0	0	0	2
Chr2	30525586	30533314	30525755	30533115	+	1	0	3	0
Chr2	30525586	30568176	30525755	30533115	+	0	4	0	0
Chr2	32174062	32184338	32175361	32177476	+	0	0	0	8
Chr2	32478634	32479617	32478818	32479461	+	0	0	2	0
Chr2	37013840	37020836	37019877	37020654	-	0	1	0	0
Chr2	37289355	37290999	37289513	37290867	-	0	0	1	1
Chr2	38309378	38319019	38318639	38318884	-	0	5	0	0
Chr2	39336919	39337581	39336967	39337525	-	2	3	0	4
Chr2	43957384	43975217	43957451	43960540	-	0	1	0	0
Chr2	47790926	47796063	47791123	47795893	+	0	0	0	2
Chr2	53700270	53729570	53700528	53714383	-	0	1	0	0
Chr2	60782685	60783209	60782770	60783155	+	0	0	1	0
Chr2	61278164	61281242	61280348	61281089	-	0	0	0	1
Chr2	61482379	61490776	61488271	61488587	-	0	2	0	0
Chr2	61485767	61490776	61488271	61488587	-	0	3	2	0
Chr2	61488164	61490776	61488271	61488587	-	1	0	0	2
Chr2	61488587	61490776	61488771	61490641	-	0	0	0	1
Chr2	61495454	61502310	61502040	61502248	-	0	0	0	1
Chr2	61498672	61522683	61502040	61502248	-	0	3	0	0
Chr2	61501995	61502310	61502040	61502248	-	1	3	0	3
Chr2	61522610	61526521	61525333	61525491	-	0	3	3	7
Chr2	61522610	61533903	61525333	61525491	-	0	2	0	1
Chr2	63152913	63153574	63152945	63153494	-	0	0	0	1
Chr2	72718102	72733118	72731245	72733070	-	0	0	0	1
Chr2	72731006	72733118	72731245	72733070	-	3	0	0	1
Chr2	72731006	72741469	72731245	72733070	-	0	0	0	1
Chr2	74427168	74427592	74427273	74427423	-	2	0	0	0
Chr2	85368685	85369830	85368754	85369738	+	4	7	0	5
Chr2	85554142	85559075	85558605	85558916	-	0	0	0	1
Chr2	85555483	85556260	85555590	85556181	-	1	1	0	3
Chr2	86127160	86127991	86127305	86127940	+	0	0	0	1
Chr2	86159535	86173761	86171345	86173649	-	0	0	0	3
Chr2	86449806	86464216	86457071	86464052	+	0	0	1	0
Chr2	88801098	88804880	88804450	88804786	+	0	1	0	0
Chr2	95851693	95860074	95851787	95852125	-	0	1	0	0
Chr2	96194957	96195549	96195007	96195340	-	0	2	0	1
Chr2	97657447	97659477	97658643	97658878	-	0	9	0	0
Chr2	99410694	99435941	99418947	99421498	-	0	1	0	0
Chr2	99418827	99435941	99418947	99421498	-	0	0	0	1
Chr2	99429839	99435941	99429948	99434331	-	0	3	0	0
Chr2	101294013	101295181	101294082	101294930	-	1	3	0	0
Chr2	105342847	105343223	105342974	105343100	+	3	8	2	4
Chr2	106122969	106166083	106123091	106125619	-	0	0	1	0
Chr2	106158057	106166083	106158118	106163666	-	1	12	0	10
Chr2	108451027	108452466	108451112	108452398	+	0	0	0	1
Chr2	110161602	110163132	110161697	110163047	-	0	0	0	2
Chr2	110161602	110163135	110161697	110163047	-	0	4	0	0
Chr2	112501205	112503181	112501341	112502911	+	0	7	0	0
Chr2	112647323	112647738	112647464	112647652	+	0	0	0	1
Chr2	121525844	121527890	121525920	121527798	-	0	6	0	0
Chr2	127850589	127853105	127850685	127852924	-	0	4	0	0
Chr2	128164729	128171284	128170390	128171204	+	1	0	0	0
Chr2	128170287	128171284	128170390	128171204	+	0	5	0	1
Chr2	130172348	130176637	130173656	130174913	-	2	0	0	0
Chr2	131071854	131082657	131071938	131082576	-	16	27	7	8
Chr2	135126180	135126656	135126249	135126582	+	6	5	0	1
Chr2	135862606	135865163	135862748	135865012	-	0	1	0	0
Chr2	152690961	152694622	152693068	152694541	-	0	1	0	0
Chr2	159256195	159259843	159257864	159257944	-	0	0	0	1
Chr2	169537226	169538141	169537340	169538012	-	0	0	0	1
Chr2	171826797	171834865	171834056	171834726	-	0	0	0	1
Chr2	175970763	175995646	175979868	175995557	-	0	0	0	3
Chr2	176296859	176328912	176297895	176323391	+	0	0	0	1
Chr2	176296859	176330660	176297895	176323391	+	0	0	0	2
Chr2	178535731	178542361	178537447	178537603	+	1	0	4	2
Chr2	178537603	178542361	178539890	178540106	+	0	1	0	0
Chr2	178571299	178597681	178571449	178591138	+	0	2	0	0
Chr2	178591138	178600667	178597681	178599593	+	2	0	2	0
Chr2	178597595	178600667	178597681	178599593	+	0	0	1	1
Chr2	179973192	179973802	179973246	179973633	-	1	0	0	0
Chr2	182952404	182953331	182952502	182952792	-	0	0	0	2
Chr2	182994838	182995838	182994887	182995700	-	7	2	0	1
Chr2	200856681	200856985	200856811	200856890	-	2	0	16	20
Chr2	200856681	200858089	200856811	200856890	-	3	0	0	0
Chr2	202275112	202282472	202278002	202278211	+	2	0	0	0
Chr2	202277949	202278329	202278002	202278211	+	0	5	0	0
Chr2	202277949	202282472	202278002	202278211	+	0	1	0	0
Chr2	202284344	202291270	202290457	202291124	+	0	2	0	0
Chr2	202290322	202291270	202290457	202291124	+	2	0	0	1
Chr2	202290322	202292903	202290457	202291124	+	1	0	0	0
Chr2	206056197	206063244	206063045	206063150	-	0	0	0	2
Chr2	206279539	206297373	206279592	206280549	+	0	0	0	3
Chr2	207576630	207577224	207576693	207577109	+	0	2	0	0
Chr2	207724799	207726876	207724874	207726841	+	0	4	0	0
Chr2	214792296	214797117	214792445	214797060	-	0	0	0	1
Chr2	216464596	216475451	216468046	216475268	+	0	0	0	2
Chr2	218737578	218740584	218739163	218740057	+	0	1	0	0
Chr2	218748835	218749387	218748934	218749252	+	3	0	4	2
Chr2	219566829	219568324	219567969	219568054	-	2	2	0	0
Chr2	222639579	222648795	222643005	222648739	-	0	1	0	0
Chr2	222642850	222648795	222643005	222648739	-	2	0	0	0
Chr2	227328677	227330846	227328789	227329605	+	5	2	0	0
Chr2	230442936	230450255	230449150	230449560	+	0	7	0	2
Chr2	231788554	231791808	231791173	231791732	+	0	0	3	0
Chr2	232734416	232761436	232734486	232735154	+	0	0	1	0
Chr2	238030555	238032254	238030613	238032221	+	0	0	2	0
Chr2	238093860	238094522	238093944	238094419	+	0	0	0	1
Chr2	238182064	238184113	238182186	238183652	-	0	0	0	1
Chr2	238182064	238185287	238182186	238183652	-	0	0	0	1
Chr2	238188130	238189972	238188257	238189852	-	0	5	1	0
Chr2	238433312	238433695	238433447	238433548	+	7	0	4	1
Chr2	239990073	240007370	240005295	240007315	-	47	75	15	25
Chr2	239990073	240011696	240005295	240007315	-	0	0	0	2
Chr2	240005209	240007370	240005295	240007315	-	2	2	0	2
Chr2	240552913	240555055	240553057	240554865	-	0	4	0	0
Chr2	241403827	241407615	241404841	241407536	+	0	0	1	1
Chr2	241403827	241413421	241404841	241407536	+	5	0	0	0
Chr2	241434157	241435030	241434321	241434961	+	0	0	0	1
Chr2	241483464	241484331	241483533	241484241	+	1	0	0	2
Chr2	241496397	241500796	241499414	241500172	-	0	3	0	0
Chr2	241601895	241603079	241601999	241602969	-	1	0	3	2
Chr2	241654545	241655343	241654647	241655270	+	0	6	4	1
Chr2	241748864	241756014	241751388	241754630	+	3	0	0	0
Chr20	1372075	1375603	1372240	1375490	-	4	0	0	0
Chr20	2465707	2467758	2467315	2467606	-	0	2	0	0
Chr20	2653278	2654575	2653393	2654175	+	0	0	0	2
Chr20	2705973	2709642	2706264	2707946	+	0	5	0	0
Chr20	3348524	3376302	3375126	3376177	-	0	1	0	0
Chr20	3374047	3376302	3375126	3376177	-	0	0	0	1
Chr20	17956932	17961326	17957037	17961139	-	1	0	0	0
Chr20	18297984	18306393	18298062	18298288	+	0	0	0	1
Chr20	18510821	18512282	18511056	18512224	+	0	0	0	1
Chr20	20022455	20025767	20022480	20025676	+	0	0	0	1
Chr20	20022455	20026919	20022480	20025676	+	0	3	0	0
Chr20	21326278	21326601	21326406	21326489	+	0	0	5	0
Chr20	21326278	21328670	21326406	21326489	+	0	0	3	0
Chr20	21330480	21344208	21330539	21330615	+	0	0	1	0
Chr20	24968891	24970371	24969660	24970196	-	0	0	1	0
Chr20	24969525	24973737	24969660	24970196	-	0	0	2	1
Chr20	25209848	25213406	25209925	25213262	+	0	0	1	0
Chr20	25491350	25501010	25498346	25500839	-	0	12	0	0
Chr20	32366383	32369123	32366466	32369014	+	0	0	1	3
Chr20	32930397	32931336	32930616	32931177	+	0	0	0	1
Chr20	33619516	33628435	33623854	33624763	+	3	0	0	0
Chr20	33623114	33625017	33623854	33624763	+	0	2	0	0
Chr20	34031521	34033239	34031604	34033163	+	0	0	2	0
Chr20	34072065	34076040	34073866	34075873	+	0	0	0	2
Chr20	34294080	34295585	34294156	34295394	-	4	0	0	0
Chr20	35709223	35713096	35709256	35710282	-	2	0	0	0
Chr20	35713018	35725155	35713096	35714184	-	0	3	0	0
Chr20	35716739	35725155	35721877	35724569	-	1	0	0	0
Chr20	36607714	36609730	36607818	36607889	+	0	0	2	1
Chr20	37056145	37065473	37061269	37062083	-	0	8	0	1
Chr20	37061102	37062270	37061269	37062083	-	3	0	0	0
Chr20	37061102	37065473	37061269	37062083	-	0	0	0	1
Chr20	37228549	37234095	37228744	37229972	+	0	0	0	2
Chr20	38531166	38532859	38531231	38532729	+	0	0	0	1
Chr20	41159605	41160153	41159758	41159869	+	0	0	1	2
Chr20	41351820	41352220	41351920	41352059	+	1	0	0	1
Chr20	43686851	43700044	43687072	43692156	+	0	0	1	0
Chr20	44506826	44511368	44506996	44509890	-	1	0	0	0
Chr20	48953555	48963898	48953790	48963829	+	0	0	1	0
Chr20	49066191	49066510	49066293	49066364	+	0	0	0	1
Chr20	58438944	58441083	58439025	58440906	+	1	2	3	16
Chr20	58693736	58713543	58712579	58713419	+	0	0	6	0
Chr20	58895611	58905480	58903585	58903671	+	3	0	0	0
Chr20	62139074	62140944	62139197	62139695	-	4	1	2	1
Chr20	62256056	62260125	62256221	62260016	+	0	0	6	0
Chr20	62256056	62263691	62256221	62260016	+	2	3	0	3
Chr20	62256056	62272259	62256221	62260016	+	6	6	0	0
Chr20	63672555	63674093	63672621	63673939	+	0	0	2	0
Chr20	63691741	63693283	63693003	63693142	+	2	0	0	0
Chr20	63869295	63873816	63869441	63873667	+	0	0	3	0
Chr20	63928334	63931022	63928452	63929311	+	3	2	0	1
Chr20	63944396	63946267	63945975	63946160	-	0	0	0	2
Chr20	63963788	63964217	63963913	63964070	-	2	0	0	0
Chr21	15762890	15766141	15762968	15765996	+	10	4	0	2
Chr21	33524768	33528604	33528335	33528518	-	3	0	0	0
Chr21	34102834	34103519	34102908	34103496	+	2	5	3	7
Chr21	37087246	37108446	37096643	37108391	+	1	0	0	0
Chr21	37420298	37421866	37420384	37421773	+	6	4	4	1
Chr21	37420298	37472880	37420384	37421773	+	0	0	0	2
Chr21	39206107	39212707	39206274	39209994	-	0	2	0	0
Chr21	39228499	39229436	39228582	39229311	-	0	3	0	1
Chr21	39247700	39298582	39296363	39298431	-	0	0	0	1
Chr21	42850040	42852324	42850242	42852254	-	0	0	5	0
Chr21	42859661	42876767	42859722	42862281	-	0	0	1	0
Chr21	43669883	43673955	43669966	43672307	+	2	0	0	0
Chr21	43792671	43795250	43792729	43793318	+	0	0	1	0
Chr21	44032090	44063785	44032172	44037791	+	0	1	0	0
Chr21	44855209	44856364	44855256	44856192	-	0	0	2	0
Chr21	44855209	44861271	44855256	44856192	-	1	0	2	2
Chr21	46273387	46277717	46273585	46275185	-	0	0	0	2
Chr21	46314715	46315547	46315049	46315473	-	0	0	2	0
Chr21	46438163	46441084	46438337	46440082	+	0	0	0	1
Chr21	46643534	46644488	46643639	46644305	+	0	0	1	0
Chr22	17598193	17600095	17598288	17600026	-	0	0	0	2
Chr22	18987756	18988195	18987900	18988090	+	1	0	0	0
Chr22	19494326	19497447	19494382	19495980	+	3	2	0	0
Chr22	20400631	20401372	20400758	20401276	+	0	3	4	0
Chr22	21669912	21675115	21669962	21670263	+	0	6	0	4
Chr22	23683724	23695517	23690356	23694118	-	0	0	3	0
Chr22	26457858	26458577	26457967	26458444	-	2	6	0	5
Chr22	27873737	27897892	27873815	27894554	-	0	0	0	1
Chr22	27873737	27914347	27897892	27910963	-	0	0	1	1
Chr22	29520997	29525946	29521099	29525837	-	0	0	2	0
Chr22	31127950	31128654	31128062	31128213	+	0	0	1	0
Chr22	31602211	31602785	31602293	31602606	+	1	4	0	1
Chr22	31611142	31611840	31611303	31611765	+	1	2	0	2
Chr22	32478980	32485209	32484124	32485067	+	0	0	0	1
Chr22	35419883	35423341	35420012	35421317	+	0	2	0	0
Chr22	36493632	36501407	36493803	36495966	-	0	3	0	0
Chr22	36518762	36519537	36518910	36519404	-	0	0	0	2
Chr22	37623326	37623633	37623467	37623551	+	0	0	6	0
Chr22	37650151	37650725	37650249	37650541	+	0	0	2	0
Chr22	37687909	37688992	37688360	37688849	+	0	0	0	2
Chr22	37751771	37759264	37755190	37755549	+	0	0	1	0
Chr22	37812886	37813609	37812988	37813276	+	0	0	2	4
Chr22	38245934	38248019	38246100	38247769	-	0	0	0	2
Chr22	38293254	38314169	38294248	38294341	-	0	0	1	0
Chr22	38299894	38300952	38300065	38300723	-	4	0	0	0
Chr22	38493709	38495046	38494802	38494885	-	0	0	0	1
Chr22	38494629	38495046	38494802	38494885	-	0	1	0	0
Chr22	38498084	38498573	38498150	38498439	-	0	1	0	2
Chr22	39138635	39141436	39138702	39141370	-	0	6	0	1
Chr22	39529819	39532523	39529917	39530463	-	0	8	0	0
Chr22	40353072	40354327	40353117	40354247	+	0	0	0	2
Chr22	40953554	40964117	40953633	40964046	+	0	0	1	1
Chr22	40953554	40967884	40953633	40964046	+	0	0	1	0
Chr22	41338312	41339191	41338355	41339000	+	0	0	0	1
Chr22	41355468	41356808	41355862	41355953	+	4	0	0	0
Chr22	41808874	41810000	41808993	41809878	+	1	4	8	0
Chr22	41808874	41810291	41810000	41810206	+	0	5	0	1
Chr22	41808874	41813822	41810000	41810206	+	4	3	0	0
Chr22	41893116	41894937	41893285	41894819	+	0	0	3	2
Chr22	44093927	44100123	44094017	44100052	+	0	0	0	3
Chr22	44093927	44119140	44094017	44100052	+	0	0	0	1
Chr22	45330602	45332710	45330731	45332424	+	0	0	0	1
Chr22	45689711	45729590	45718493	45729424	+	0	0	0	1
Chr22	45689711	45740538	45738839	45740368	+	0	2	5	3
Chr22	45700281	45740538	45738839	45740368	+	3	0	1	0
Chr22	45718412	45740538	45738839	45740368	+	0	0	0	1
Chr22	45729424	45740538	45738839	45740368	+	3	6	9	7
Chr22	46390391	46391816	46390486	46391185	-	0	0	0	1
Chr22	46433392	46439411	46436289	46439188	-	0	0	0	1
Chr22	46792519	46797620	46792804	46793500	+	0	3	0	2
Chr22	49775590	49777813	49777161	49777677	-	4	3	0	0
Chr22	50193575	50198186	50193654	50194339	+	0	3	0	0
Chr22	50218487	50219209	50218897	50219067	-	0	2	0	0
Chr22	50255196	50256646	50255881	50256084	-	0	0	1	0
Chr22	50459254	50463432	50459392	50459469	-	6	0	0	0
Chr22	50775771	50777981	50776749	50777951	-	0	0	1	0
Chr3	5174016	5174414	5174084	5174343	+	33	0	11	24
Chr3	9445047	9445740	9445300	9445619	+	1	0	0	1
Chr3	9762913	9763213	9763052	9763138	-	7	4	11	2
Chr3	13351878	13354107	13353660	13353914	-	0	5	0	0
Chr3	15411244	15415942	15414162	15415771	-	0	0	0	1
Chr3	15414020	15425089	15414162	15415771	-	1	0	0	0
Chr3	15735409	15737233	15735497	15737032	-	0	4	0	0
Chr3	15795222	15814309	15795306	15814239	-	0	7	0	0
Chr3	16271658	16272321	16271722	16272144	+	0	8	0	0
Chr3	23910810	23911450	23910921	23911328	-	0	0	0	1
Chr3	31876432	31879830	31879553	31879654	-	0	0	1	0
Chr3	41224020	41234297	41233867	41234138	+	0	0	0	1
Chr3	47425484	47435137	47426169	47435007	-	2	2	0	0
Chr3	47661293	47670717	47661455	47662333	-	0	0	0	1
Chr3	47729024	47772936	47729094	47736033	-	0	0	0	1
Chr3	48979481	48980496	48979633	48980352	+	1	3	0	0
Chr3	49324701	49325845	49324763	49324893	-	0	0	0	2
Chr3	49847524	49848200	49847608	49848142	-	4	14	1	6
Chr3	50059648	50061221	50059746	50060955	+	0	6	0	0
Chr3	50105076	50105709	50105142	50105548	+	0	0	0	1
Chr3	50106766	50108304	50106864	50107481	+	0	7	0	0
Chr3	50106766	50109688	50106864	50107481	+	0	0	0	1
Chr3	50252099	50253184	50252142	50252396	+	0	1	0	1
Chr3	51630271	51630931	51630388	51630704	+	3	0	0	1
Chr3	52122378	52125181	52122477	52125112	-	13	13	3	2
Chr3	52641953	52648442	52644789	52648343	-	0	0	0	2
Chr3	52760794	52763624	52760936	52763469	-	0	0	0	1
Chr3	56627036	56628614	56627741	56628491	-	15	0	4	0
Chr3	56668396	56673725	56668558	56669699	-	0	0	0	1
Chr3	57847196	57858159	57849816	57856559	+	0	0	0	1
Chr3	58077045	58121503	58118989	58121240	+	0	0	1	0
Chr3	93995873	94003908	93996684	94003658	+	0	0	1	2
Chr3	98756368	98785040	98773983	98784944	+	0	0	0	1
Chr3	100732507	100736716	100732672	100736575	+	0	2	1	1
Chr3	101652495	101652938	101652671	101652779	-	2	0	0	0
Chr3	101671129	101672213	101671361	101671977	-	0	5	1	2
Chr3	113488944	113499582	113494142	113499438	-	2	0	0	0
Chr3	121471989	121473487	121472164	121473349	-	0	0	0	1
Chr3	123102410	123102796	123102494	123102750	+	0	3	0	0
Chr3	126022785	126026479	126022932	126026334	-	0	0	0	1
Chr3	128806371	128807671	128806590	128807542	+	5	2	0	3
Chr3	129254667	129255077	129254743	129254984	+	0	0	0	1
Chr3	129832773	129880559	129832826	129880308	-	0	0	0	2
Chr3	132603228	132631479	132603327	132605097	-	0	0	0	1
Chr3	132681913	132716909	132682090	132682702	-	0	0	0	1
Chr3	133623090	133624175	133623457	133624051	-	3	0	1	0
Chr3	134207471	134211607	134207525	134209694	-	0	2	0	0
Chr3	136260478	136262065	136260535	136261951	+	3	0	0	3
Chr3	136326802	136329984	136326910	136327154	+	0	4	0	0
Chr3	136945582	136946295	136945752	136946151	+	3	8	14	1
Chr3	138570317	138571356	138570498	138571033	-	0	0	3	0
Chr3	155833467	155834041	155833585	155833856	-	0	0	0	2
Chr3	160413472	160414517	160413613	160414366	+	5	0	0	1
Chr3	170359698	170361429	170359876	170360367	+	7	36	6	21
Chr3	179378340	179378814	179378443	179378584	+	2	3	0	0
Chr3	180933333	180935231	180933386	180935137	+	0	0	0	2
Chr3	180948346	180948814	180948495	180948720	+	0	0	0	1
Chr3	180968050	180970358	180968254	180970157	+	0	0	0	1
Chr3	183715143	183722136	183715262	183717650	+	0	0	0	2
Chr3	183715143	183728851	183715262	183717650	+	0	0	0	1
Chr3	183937900	183942916	183938060	183942726	-	0	0	0	1
Chr3	184305767	184306834	184305930	184306053	+	0	0	1	1
Chr3	185657285	185658409	185657402	185658340	-	0	0	0	2
Chr3	185692698	185693228	185692762	185693176	-	0	0	1	0
Chr3	186784563	186786051	186784696	186784961	+	4	20	2	3
Chr3	186787126	186787584	186787264	186787478	+	0	0	0	1
Chr3	195381008	195392147	195381062	195381902	-	2	0	1	0
Chr3	195688532	195689438	195688797	195689338	+	2	2	0	2
Chr3	196058283	196060247	196058365	196058573	-	0	0	1	0
Chr3	196247366	196248323	196247518	196248206	-	0	0	0	1
Chr3	197006548	197026759	197008724	197008808	-	0	0	0	3
Chr3	197008656	197010794	197008724	197008808	-	0	0	0	1
Chr3	197693714	197694585	197693816	197694374	-	0	0	0	1
Chr3	197693714	197695981	197693816	197694374	-	0	2	0	2
Chr3	197865422	197875775	197871462	197875697	+	9	0	0	2
Chr3	197870159	197875775	197871462	197875697	+	0	0	2	0
Chr4	730629	731110	730668	730969	+	0	0	0	1
Chr4	1225359	1238337	1228343	1238182	-	0	0	2	0
Chr4	1225359	1241519	1238337	1241324	-	0	4	0	0
Chr4	1694773	1703700	1700070	1703595	-	0	1	0	0
Chr4	1832743	1834982	1832947	1834844	-	0	7	0	1
Chr4	3154292	3157199	3154419	3157071	+	0	0	0	1
Chr4	4648976	4649542	4649109	4649369	+	3	7	4	1
Chr4	5729306	5756362	5729390	5731424	+	0	0	0	1
Chr4	17812916	17817453	17814998	17815273	+	2	0	0	0
Chr4	17814852	17815358	17814998	17815273	+	12	0	3	1
Chr4	20510494	20511137	20510566	20511065	+	0	0	0	2
Chr4	25268442	25269203	25268576	25269143	+	1	0	0	0
Chr4	39300020	39302874	39300138	39300259	-	0	0	1	0
Chr4	42455296	42455599	42455433	42455524	-	0	0	0	2
Chr4	48851805	48857365	48851975	48857212	+	1	0	0	1
Chr4	51863436	51877854	51874385	51877762	+	1	10	0	1
Chr4	55999301	55999645	55999417	55999490	+	1	6	7	5
Chr4	56403039	56406701	56403401	56406494	-	0	0	1	0
Chr4	56451871	56453761	56452052	56453602	+	1	0	0	1
Chr4	56474053	56474391	56474197	56474279	+	0	2	0	0
Chr4	73118687	73125312	73125058	73125200	-	0	0	2	0
Chr4	73135116	73142767	73135265	73139530	-	0	0	0	1
Chr4	73142241	73147432	73146873	73147240	-	0	0	0	1
Chr4	75790149	75790797	75790238	75790642	+	4	4	0	6
Chr4	77055149	77066405	77055380	77055961	-	0	0	0	2
Chr4	84896910	84932363	84897010	84932269	-	0	0	0	2
Chr4	88019457	88056267	88036353	88038250	+	0	0	0	3
Chr4	88036219	88043457	88036353	88038250	+	0	0	1	0
Chr4	88036219	88052158	88036353	88038250	+	0	0	0	1
Chr4	94276338	94283303	94281590	94283120	+	0	0	0	1
Chr4	102689573	102690957	102690771	102690879	-	0	1	1	0
Chr4	105456247	105456745	105456291	105456680	-	0	0	0	1
Chr4	123056386	123057288	123056440	123057208	+	0	0	0	1
Chr4	139393590	139404490	139393722	139404397	+	1	0	9	3
Chr4	143543508	143543972	143543657	143543852	+	2	0	0	1
Chr4	145152540	145155996	145155686	145155935	-	0	0	0	1
Chr4	153394261	153397333	153394336	153397218	+	0	3	1	4
Chr4	158697558	158699130	158697699	158698986	+	0	8	0	0
Chr4	165219933	165263359	165238899	165263196	+	0	0	0	4
Chr4	169537808	169556095	169555851	169555931	-	3	0	0	0
Chr4	169555719	169556095	169555851	169555931	-	0	0	0	1
Chr4	176149806	176151967	176149956	176150042	+	0	0	0	1
Chr5	413343	428006	413433	422728	+	0	0	0	2
Chr5	456888	458025	457006	457899	+	5	0	0	0
Chr5	618989	620261	619117	620068	+	62	42	13	27
Chr5	618989	624579	619117	620068	+	0	0	0	1
Chr5	825163	840650	837480	840494	-	0	0	0	1
Chr5	876100	889647	889160	889586	-	0	2	0	0
Chr5	915903	917151	915973	917007	+	0	0	0	1
Chr5	1279290	1282624	1279470	1280157	-	0	0	1	0
Chr5	6604137	6605408	6604685	6605272	-	2	0	0	2
Chr5	6737509	6746427	6743840	6746213	+	0	0	1	0
Chr5	14270824	14280436	14270899	14280321	+	0	0	0	1
Chr5	14316512	14336727	14330900	14336535	+	1	0	1	0
Chr5	16758117	16762637	16762113	16762544	-	0	0	0	1
Chr5	33460901	33461295	33461064	33461157	+	2	0	0	0
Chr5	34922216	34923234	34922287	34922538	+	0	0	0	1
Chr5	36176964	36177292	36177016	36177184	+	0	0	2	0
Chr5	37026228	37027412	37026327	37027358	+	0	3	0	0
Chr5	37120215	37122488	37121784	37122429	-	0	0	2	0
Chr5	37153739	37165671	37164327	37165538	-	0	4	0	0
Chr5	37179360	37181005	37180183	37180856	-	0	3	0	0
Chr5	37351189	37358151	37351356	37352736	-	0	3	0	0
Chr5	38990948	39003622	39002666	39003557	-	1	0	0	0
Chr5	43161248	43161931	43161613	43161708	+	1	16	1	4
Chr5	43292473	43297166	43292637	43292847	-	0	3	0	0
Chr5	43292473	43298975	43292637	43292847	-	0	0	0	2
Chr5	43609142	43628387	43624120	43628199	+	0	0	0	4
Chr5	43624031	43628387	43624120	43628199	+	0	0	1	0
Chr5	57230845	57231321	57230969	57231097	+	2	0	0	0
Chr5	57246299	57249576	57247215	57249453	+	0	0	2	0
Chr5	62361241	62363899	62363320	62363694	+	0	0	0	1
Chr5	62393954	62398881	62398560	62398645	-	0	0	0	1
Chr5	69174876	69175537	69175113	69175396	+	1	1	6	0
Chr5	72887069	72889957	72887222	72888077	+	0	0	1	0
Chr5	74834425	74841679	74834597	74838964	-	0	0	1	0
Chr5	77046346	77048272	77046677	77048160	+	2	0	0	0
Chr5	77449759	77453928	77451353	77453816	-	0	1	0	1
Chr5	80455691	80459494	80455774	80456460	+	0	0	0	1
Chr5	88270525	88287622	88285851	88287435	+	0	1	0	0
Chr5	95755395	95763620	95755761	95763507	+	0	0	0	1
Chr5	122795265	122808355	122803613	122808276	+	0	0	0	1
Chr5	128112813	128114681	128112933	128114211	+	0	0	1	0
Chr5	128112813	128141981	128112933	128114211	+	0	2	0	0
Chr5	129526283	129528677	129526456	129527747	+	2	7	0	4
Chr5	132883339	132885119	132883560	132885075	-	0	0	0	1
Chr5	134535857	134538083	134535915	134537988	+	0	1	0	1
Chr5	137942874	137943216	137943038	137943132	-	0	0	1	2
Chr5	138198198	138198782	138198523	138198604	-	0	3	0	0
Chr5	139278326	139279129	139278408	139278564	+	4	8	2	2
Chr5	139363758	139364743	139363922	139364563	+	0	0	0	2
Chr5	139600371	139614966	139614617	139614696	+	1	0	0	0
Chr5	139614585	139614966	139614617	139614696	+	4	0	0	0
Chr5	139614585	139623461	139614617	139614696	+	0	0	1	0
Chr5	145817893	145826200	145818054	145819378	-	3	0	0	0
Chr5	146144266	146144709	146144537	146144623	-	3	0	0	0
Chr5	154790324	154790710	154790386	154790644	+	0	0	0	1
Chr5	157325481	157326267	157325638	157326170	+	0	0	0	1
Chr5	168488601	168494650	168492791	168493893	+	5	2	2	1
Chr5	170878096	170881896	170878243	170881805	+	0	0	0	1
Chr5	171392709	171392978	171392816	171392913	+	0	0	0	1
Chr5	176359480	176359918	176359567	176359810	-	3	0	0	0
Chr5	177466771	177468899	177466835	177466910	-	0	0	0	2
Chr5	179076444	179077166	179076571	179077070	+	0	0	0	1
Chr5	179620891	179621397	179621035	179621241	-	0	0	0	1
Chr5	179705678	179709059	179708380	179708977	+	0	2	0	0
Chr5	179708238	179709059	179708380	179708977	+	0	0	1	0
Chr5	179709872	179716294	179710065	179716104	+	0	4	0	0
Chr6	345853	348841	348274	348768	+	0	0	1	0
Chr6	2779262	2783561	2779492	2783405	+	4	0	0	1
Chr6	2779262	2784403	2779492	2783405	+	2	0	1	0
Chr6	3076763	3081116	3076987	3077778	+	0	0	1	0
Chr6	10702368	10702639	10702489	10702564	+	0	0	0	4
Chr6	15496131	15504592	15501409	15504499	+	0	0	5	0
Chr6	17665238	17669546	17665385	17668974	-	0	0	0	1
Chr6	28248066	28249834	28248149	28249686	-	0	0	0	2
Chr6	29737965	29738455	29738201	29738334	-	0	0	2	0
Chr6	30034907	30035983	30035110	30035915	-	0	0	1	0
Chr6	30555054	30555720	30555191	30555554	-	0	0	2	0
Chr6	30583065	30584566	30584331	30584417	+	0	0	1	0
Chr6	31148404	31148728	31148511	31148617	-	0	0	0	1
Chr6	31640384	31640704	31640528	31640644	-	0	0	2	0
Chr6	33403313	33404129	33403367	33403484	+	0	0	0	1
Chr6	33776953	33786774	33784427	33786733	-	0	0	0	1
Chr6	34821652	34821955	34821815	34821916	+	0	0	2	4
Chr6	34821652	34823348	34821815	34821916	+	0	0	2	0
Chr6	35468946	35469529	35469285	35469380	+	2	0	0	0
Chr6	37359182	37360574	37359342	37360445	+	0	0	0	1
Chr6	37458611	37463008	37462102	37462828	+	0	1	0	2
Chr6	42934474	42935670	42934598	42935573	+	1	0	2	0
Chr6	43138848	43139525	43139271	43139405	+	1	19	4	1
Chr6	43497880	43503706	43499100	43500743	+	0	0	2	0
Chr6	43524470	43525214	43524635	43524830	-	0	0	0	1
Chr6	43777468	43778918	43777665	43778459	+	0	0	0	1
Chr6	52267864	52269226	52267968	52269085	-	0	0	2	1
Chr6	53071056	53076543	53073639	53076485	+	0	0	0	1
Chr6	63694580	63703671	63698367	63698448	+	0	0	0	1
Chr6	70426569	70428419	70426709	70428303	+	3	0	2	0
Chr6	73466208	73466606	73466408	73466488	+	0	0	3	0
Chr6	75621531	75634811	75633726	75634706	+	0	4	0	0
Chr6	82210813	82212793	82211572	82212706	-	3	2	0	0
Chr6	83022452	83024038	83022561	83023968	-	0	1	0	0
Chr6	99414571	99416428	99415747	99416348	-	0	0	0	1
Chr6	104849141	104852371	104849246	104850906	-	0	5	0	0
Chr6	107503656	107506427	107503795	107506241	+	0	0	3	0
Chr6	107904628	107924932	107904721	107906447	-	0	0	3	0
Chr6	110887504	110890356	110887591	110888856	+	0	0	2	0
Chr6	116698703	116705160	116702150	116705071	+	0	5	1	0
Chr6	145888019	145894977	145893393	145894149	-	1	1	0	0
Chr6	149572284	149572603	149572344	149572506	+	3	1	2	2
Chr6	149603267	149604782	149603373	149604660	-	2	6	0	1
Chr6	157867546	157875176	157873176	157875050	+	0	2	0	1
Chr6	158448995	158452268	158449176	158452133	+	0	0	0	1
Chr6	158580939	158589782	158585425	158589671	+	0	0	2	0
Chr6	158608332	158608750	158608463	158608658	+	0	3	0	0
Chr6	158608332	158623607	158608463	158608658	+	0	5	0	0
Chr6	159784665	159785496	159784847	159785385	-	0	5	0	0
Chr6	167003192	167004401	167003811	167004263	+	0	1	0	0
Chr6	167870385	167880517	167870498	167872216	+	0	1	0	0
Chr7	1898199	1957719	1936897	1957628	-	0	3	0	0
Chr7	1898199	1980541	1936897	1957628	-	1	0	0	0
Chr7	1898199	2002121	1936897	1957628	-	3	0	0	0
Chr7	1936686	1957719	1936897	1957628	-	1	2	0	0
Chr7	1936686	2002121	1936897	1957628	-	0	0	0	1
Chr7	2229983	2230727	2230143	2230548	-	0	5	1	0
Chr7	2229983	2230764	2230143	2230548	-	2	0	0	0
Chr7	2264297	2278305	2264458	2269558	-	0	0	0	1
Chr7	2363631	2364529	2363760	2364371	+	4	0	2	1
Chr7	2366316	2369682	2366448	2366524	+	1	2	0	0
Chr7	4781567	4783798	4783460	4783688	+	4	0	0	0
Chr7	5739275	5741815	5739352	5740972	-	0	7	1	2
Chr7	6412810	6416921	6412883	6412965	-	0	0	2	0
Chr7	11061790	11111467	11061841	11061963	+	0	0	0	1
Chr7	22291174	22318037	22310090	22315369	-	2	10	0	0
Chr7	22308338	22318037	22310090	22315369	-	1	0	0	0
Chr7	23521706	23522432	23521840	23522131	-	4	0	0	0
Chr7	24620051	24668660	24665687	24666020	+	0	0	0	1
Chr7	24623665	24668660	24665687	24666020	+	0	1	0	2
Chr7	24641715	24650712	24641868	24649611	+	0	3	0	0
Chr7	24641715	24668660	24665687	24666020	+	0	2	0	1
Chr7	26195846	26197017	26196481	26196556	-	0	0	0	1
Chr7	26196400	26197732	26196481	26196556	-	0	0	1	0
Chr7	30455136	30457042	30455311	30456720	-	0	5	0	0
Chr7	30621392	30622462	30621500	30622316	+	0	0	0	3
Chr7	32930077	32933896	32930108	32933813	-	0	0	0	2
Chr7	33021271	33022099	33021357	33022052	-	0	0	0	1
Chr7	35831352	35832900	35831496	35832797	+	0	0	0	1
Chr7	39781743	39789544	39781885	39782734	+	0	0	0	1
Chr7	40078004	40078851	40078121	40078719	+	1	0	0	0
Chr7	43639448	43640649	43639681	43640572	-	5	7	3	6
Chr7	43965866	43966395	43965961	43966263	-	10	0	0	1
Chr7	43986191	43986677	43986312	43986600	-	21	4	9	2
Chr7	44798747	44799480	44798904	44799246	+	2	0	0	0
Chr7	50732271	50780736	50756056	50780626	-	2	0	0	0
Chr7	56078101	56078508	56078186	56078363	+	5	0	0	0
Chr7	64543706	64544432	64543802	64544305	-	20	6	8	8
Chr7	65974294	65976202	65974441	65974525	-	1	0	0	0
Chr7	65979398	65980409	65979541	65979726	-	0	0	2	1
Chr7	73686635	73686900	73686731	73686817	+	0	0	0	1
Chr7	74096621	74097189	74096760	74097079	+	5	0	0	0
Chr7	74356409	74357477	74356623	74357279	+	0	0	0	1
Chr7	75562934	75568256	75563075	75563187	-	0	0	1	0
Chr7	75983519	75983856	75983636	75983737	+	0	3	0	0
Chr7	88209982	88210925	88210130	88210881	-	3	0	0	3
Chr7	94618757	94644667	94618956	94623324	-	2	0	0	0
Chr7	98933240	98935675	98933402	98935578	+	0	0	0	3
Chr7	98967040	98967698	98967162	98967484	+	0	0	0	1
Chr7	99390892	99391253	99391099	99391177	+	1	0	5	5
Chr7	100023418	100024307	100023932	100024153	+	1	1	0	3
Chr7	100102674	100102960	100102781	100102863	+	0	0	3	1
Chr7	100103408	100103692	100103519	100103611	+	0	5	2	1
Chr7	100103408	100104154	100103519	100103611	+	0	0	1	0
Chr7	100111727	100112253	100111829	100111921	-	1	0	0	2
Chr7	100111727	100114268	100111829	100111921	-	2	0	0	0
Chr7	100351251	100355240	100351410	100352162	+	0	0	2	0
Chr7	100854155	100857176	100854378	100854619	+	0	0	0	1
Chr7	102468262	102468654	102468377	102468553	+	0	0	0	1
Chr7	102772408	102787469	102777348	102787334	+	0	7	0	0
Chr7	103319608	103322794	103319678	103319755	-	2	0	0	0
Chr7	103361956	103362758	103362088	103362685	+	6	0	0	3
Chr7	105565276	105565648	105565457	105565529	+	0	0	1	0
Chr7	128335542	128336042	128335679	128335846	-	0	0	0	5
Chr7	128578889	128580094	128578933	128579998	+	0	0	0	2
Chr7	129014978	129018157	129017056	129017956	-	0	2	0	0
Chr7	129205202	129206587	129205412	129205609	+	1	5	0	1
Chr7	130039463	130049144	130039547	130040950	-	0	0	0	3
Chr7	143292299	143292698	143292467	143292616	+	0	0	3	0
Chr7	149008158	149021147	149019197	149020966	-	0	0	3	0
Chr7	149018991	149021147	149019197	149020966	-	0	1	0	2
Chr7	155301565	155302417	155301690	155302250	+	0	11	0	0
Chr7	156724111	156763795	156725525	156725763	-	0	2	0	0
Chr7	156725434	156728007	156725525	156725763	-	0	3	0	0
Chr7	158788003	158798076	158788417	158793649	-	0	0	1	0
Chr7	158788003	158799072	158788417	158793649	-	0	3	0	1
Chr8	18011236	18011827	18011366	18011666	+	1	5	1	3
Chr8	18765448	18804898	18804602	18804703	-	0	4	1	0
Chr8	18799294	18804898	18804602	18804703	-	12	9	4	10
Chr8	23434316	23439915	23434478	23435391	-	0	2	0	0
Chr8	25268844	25278665	25275441	25278568	+	2	0	0	1
Chr8	25275385	25278665	25275441	25278568	+	0	0	0	1
Chr8	27604923	27605335	27605069	27605171	-	1	6	0	1
Chr8	30793916	30794281	30794078	30794191	-	3	0	0	0
Chr8	37473077	37476012	37473210	37475841	-	1	3	1	3
Chr8	38266140	38268461	38267960	38268370	-	0	0	0	1
Chr8	41598291	41599304	41598476	41599233	+	8	6	11	5
Chr8	41661429	41661941	41661564	41661875	-	1	0	2	0
Chr8	42325969	42329214	42326097	42329123	+	0	0	0	1
Chr8	42401787	42403461	42402015	42403310	+	3	1	0	5
Chr8	43059091	43064215	43059177	43064100	+	6	15	1	5
Chr8	47598945	47713641	47712872	47713488	+	0	0	0	2
Chr8	47712661	47713641	47712872	47713488	+	3	0	0	0
Chr8	47728932	47729465	47729047	47729411	+	2	0	1	0
Chr8	47912409	47944029	47927353	47927770	-	0	2	0	0
Chr8	47918276	47927890	47927353	47927770	-	0	0	2	0
Chr8	47927193	47927890	47927353	47927770	-	0	3	0	1
Chr8	47957170	47957431	47957263	47957354	-	0	0	2	0
Chr8	47966186	47967485	47966407	47967364	+	0	0	0	1
Chr8	54052654	54063375	54052756	54055059	-	0	5	0	0
Chr8	61680967	61684188	61681036	61682438	-	1	1	0	3
Chr8	67217781	67218138	67217920	67218002	-	0	0	3	1
Chr8	94458267	94467555	94458436	94467404	-	0	6	0	1
Chr8	94537102	94538346	94537151	94538259	-	0	2	1	2
Chr8	94738368	94739790	94739534	94739644	+	0	0	0	1
Chr8	100704296	100705673	100705056	100705588	-	0	0	0	1
Chr8	102346235	102347092	102346395	102346902	-	1	0	0	1
Chr8	102833055	102834747	102833218	102834188	-	0	0	0	1
Chr8	123333877	123336532	123334322	123336372	-	0	0	0	1
Chr8	123337624	123339446	123337821	123339310	-	0	0	1	2
Chr8	140674297	140675499	140674404	140675429	-	0	0	0	1
Chr8	140846259	140890769	140879637	140890542	-	3	0	0	0
Chr8	140846598	140890769	140879637	140890542	-	3	0	0	0
Chr8	140864311	140890769	140879637	140890542	-	0	8	3	1
Chr8	140879470	140890769	140879637	140890542	-	0	2	0	0
Chr8	141136508	141138137	141136791	141138021	+	0	0	0	2
Chr8	141150833	141151837	141150953	141151618	+	0	0	0	1
Chr8	142330900	142331831	142330970	142331753	-	10	0	0	4
Chr8	142330900	142354763	142330970	142331753	-	4	0	0	0
Chr8	143616105	143616723	143616440	143616566	-	0	0	0	1
Chr8	143812816	143813104	143812961	143813029	-	0	0	0	1
Chr8	144317186	144317445	144317252	144317332	-	0	0	0	1
Chr8	144425682	144426208	144425772	144426025	-	1	0	1	0
Chr9	6493825	6499931	6497360	6498017	+	0	6	0	0
Chr9	13247634	13250372	13247801	13250299	-	0	0	0	1
Chr9	14639895	14680162	14674385	14680032	-	0	4	0	2
Chr9	19086733	19087156	19086782	19087090	-	4	0	3	0
Chr9	20715321	20789608	20715410	20717793	+	0	0	0	2
Chr9	20819795	20823115	20819900	20820323	+	0	0	0	1
Chr9	26861065	26884885	26861139	26884809	-	0	0	0	4
Chr9	33271151	33278225	33276564	33278112	+	0	8	0	0
Chr9	33971650	33973237	33971754	33973182	-	0	14	5	5
Chr9	35606236	35607672	35606285	35606836	+	0	0	0	1
Chr9	35663321	35664492	35664126	35664371	-	0	3	0	0
Chr9	77238001	77238386	77238191	77238271	+	6	6	9	3
Chr9	78251904	78253277	78252043	78253231	+	0	0	0	1
Chr9	83677726	83678599	83677961	83678440	-	0	0	1	1
Chr9	85974966	85978381	85976735	85977362	+	0	4	0	1
Chr9	92034809	92038365	92034883	92038247	-	3	0	0	0
Chr9	92256679	92269983	92258998	92260150	-	4	12	0	4
Chr9	92634385	92642810	92638280	92640709	-	0	4	0	0
Chr9	92855810	92856318	92855903	92856191	-	12	3	10	2
Chr9	93229695	93239976	93238321	93239756	+	0	4	0	0
Chr9	93238232	93239976	93238321	93239756	+	0	0	4	0
Chr9	93471140	93476338	93471387	93476255	+	0	3	1	0
Chr9	93471140	93498886	93471387	93476255	+	1	0	0	0
Chr9	93527154	93532329	93529580	93532154	+	3	0	0	0
Chr9	95005157	95005616	95005220	95005541	+	1	0	0	0
Chr9	95978060	96004701	95978215	95997245	+	0	0	0	1
Chr9	99959916	99960155	99960032	99960104	+	0	0	0	4
Chr9	105705596	105722621	105721721	105722533	+	0	0	0	1
Chr9	105721536	105722621	105721721	105722533	+	7	11	2	0
Chr9	109263049	109268433	109267551	109268390	-	0	3	0	0
Chr9	111384521	111385442	111384569	111385336	-	1	0	0	1
Chr9	111386376	111391824	111389723	111389983	-	0	0	2	1
Chr9	111533738	111534353	111533865	111534260	+	10	9	1	1
Chr9	121161855	121162271	121161971	121162053	+	1	0	0	0
Chr9	121161855	121166180	121161971	121162053	+	0	5	0	0
Chr9	122280442	122291840	122285946	122286038	+	0	3	0	0
Chr9	122285168	122286166	122285946	122286038	+	2	0	0	1
Chr9	122285168	122291840	122285946	122286038	+	0	3	3	2
Chr9	122877470	122883379	122880794	122883203	-	0	3	0	0
Chr9	124412351	124414935	124414005	124414841	-	0	0	0	1
Chr9	125001964	125003570	125003215	125003468	-	0	0	0	1
Chr9	127925106	127925979	127925260	127925866	-	0	9	1	0
Chr9	128352637	128353541	128353234	128353414	+	8	14	6	3
Chr9	128422867	128424614	128422978	128423145	+	0	0	0	1
Chr9	128611713	128613485	128612246	128613380	+	0	0	0	2
Chr9	128716746	128718625	128716923	128718324	+	0	0	0	1
Chr9	128826021	128826629	128826152	128826383	-	4	0	0	0
Chr9	128998150	128998623	128998228	128998537	+	5	0	0	0
Chr9	129067772	129068332	129067871	129068197	+	0	0	1	0
Chr9	129807187	129809032	129807363	129808904	+	7	0	0	4
Chr9	130222649	130223159	130222738	130223081	+	0	0	2	1
Chr9	131071483	131073321	131072835	131073244	+	0	7	0	0
Chr9	131430089	131432794	131430259	131432616	+	0	2	1	0
Chr9	131436619	131439061	131436722	131438988	+	6	1	7	6
Chr9	131506113	131506453	131506220	131506402	+	46	19	30	25
Chr9	131506113	131507514	131506220	131506402	+	0	7	0	0
Chr9	131508910	131510415	131510062	131510259	+	0	0	2	0
Chr9	131638634	131650949	131650242	131650809	-	0	0	0	2
Chr9	131643238	131650949	131650242	131650809	-	0	1	0	5
Chr9	131650128	131650949	131650242	131650809	-	0	0	0	1
Chr9	132906730	132907370	132906835	132907300	-	0	1	1	1
Chr9	133407806	133408842	133407881	133408767	-	0	0	0	4
Chr9	133408767	133412921	133412492	133412777	-	0	0	0	1
Chr9	133412298	133412921	133412492	133412777	-	4	7	11	11
Chr9	133448598	133449965	133448728	133449782	+	0	0	0	1
Chr9	134774858	134782720	134780146	134782666	+	4	0	0	0
Chr9	135866455	135883078	135881794	135882815	-	0	0	2	2
Chr9	135881632	135883078	135881794	135882815	-	115	160	215	248
Chr9	136013198	136016429	136013296	136013863	-	0	0	0	2
Chr9	136348696	136349763	136348767	136349586	+	1	6	5	3
Chr9	136381321	136392777	136392594	136392672	-	0	0	2	0
Chr9	136387484	136387848	136387579	136387741	-	2	0	1	0
Chr9	136391941	136392777	136392594	136392672	-	0	2	5	5
Chr9	136391941	136394878	136392594	136392672	-	2	0	0	0
Chr9	136432955	136434863	136433075	136433154	-	0	0	0	1
Chr9	136459133	136461274	136459874	136460041	-	0	0	2	0
Chr9	136726310	136727086	136726416	136727045	-	0	1	0	5
Chr9	136992639	136992974	136992700	136992924	+	0	0	1	0
Chr9	137088074	137089005	137088183	137088267	+	0	0	0	1
Chr9	137088074	137096391	137088183	137088267	+	0	2	0	0
Chr9	137114242	137114576	137114382	137114462	-	1	0	0	0
Chr9	137232071	137233404	137232161	137232574	+	1	0	0	0
Chr9	137372904	137374763	137373599	137374611	-	0	7	0	0
Chr9	137467316	137484736	137478152	137479055	-	0	0	0	1
Chr9	137564433	137565154	137564606	137564892	-	10	19	1	1
Chr9	137564433	137576167	137564606	137564892	-	0	0	0	1
Chr9	137586966	137588718	137587107	137587716	-	0	2	3	0
Chr9	137710966	137744090	137743528	137743901	+	0	0	0	2
Chr9	137754170	137782397	137778055	137779634	+	0	1	0	0
Chrx	23704693	23707944	23706739	23707876	-	0	2	0	0
Chrx	24057420	24057754	24057548	24057632	+	1	0	0	0
Chrx	24172714	24179770	24172800	24173606	+	0	0	0	2
Chrx	24503326	24505298	24503511	24505208	+	0	0	0	1
Chrx	24735398	24737741	24735488	24737624	+	6	0	0	0
Chrx	24821451	24843677	24821583	24826426	+	0	5	0	1
Chrx	24821451	24888122	24821583	24826426	+	1	0	0	0
Chrx	41123470	41131536	41123724	41128999	+	3	0	0	0
Chrx	41337407	41339083	41337465	41337690	+	0	6	0	1
Chrx	46984883	46985792	46984940	46985712	+	0	0	1	0
Chrx	47199047	47199614	47199377	47199479	+	0	0	0	1
Chrx	48481150	48483027	48482794	48482985	+	0	2	0	0
Chrx	48597957	48604390	48598037	48598716	+	0	0	4	0
Chrx	53561755	53562244	53561924	53562110	-	0	0	2	0
Chrx	53614533	53615835	53614745	53615743	-	4	0	1	1
Chrx	53645310	53654131	53648310	53654062	-	0	5	0	0
Chrx	54465450	54465852	54465589	54465695	-	4	0	0	0
Chrx	71423116	71424238	71423239	71423973	+	0	0	0	2
Chrx	71592121	71594779	71594377	71594745	+	0	0	0	1
Chrx	72490928	72495268	72491006	72495155	-	0	0	0	2
Chrx	73822070	73826347	73822216	73826114	-	2	1	0	0
Chrx	73829067	73833374	73831206	73833237	-	0	0	0	1
Chrx	77663381	77664778	77663558	77664644	-	6	0	0	0
Chrx	78122834	78123374	78122949	78123194	+	0	0	0	1
Chrx	78124873	78125425	78125051	78125326	+	0	0	0	1
Chrx	80809012	80809304	80809042	80809245	-	0	1	4	3
Chrx	101120401	101120784	101120450	101120737	+	0	0	0	5
Chrx	101398369	101398946	101398567	101398784	-	0	0	0	1
Chrx	102839800	102865152	102839863	102845856	+	0	1	0	3
Chrx	115633999	115643508	115634081	115634880	+	0	0	0	2
Chrx	123610917	123611516	123610963	123611439	-	4	0	0	3
Chrx	123610917	123613708	123613556	123613638	-	0	0	0	2
Chrx	123610917	123614189	123613556	123613638	-	0	0	2	0
Chrx	124037526	124042645	124037623	124042568	+	0	3	0	0
Chrx	131709497	131785258	131755746	131756610	-	0	2	0	0
Chrx	131711650	131794466	131794115	131794296	-	0	0	0	1
Chrx	131749305	131794466	131794115	131794296	-	0	16	1	2
Chrx	131755597	131784039	131755746	131756610	-	0	0	0	1
Chrx	131755597	131785258	131755746	131756610	-	0	0	0	1
Chrx	131783886	131794466	131794115	131794296	-	0	3	0	0
Chrx	135545422	135549805	135545572	135546379	+	0	0	1	0
Chrx	135545422	135556300	135545572	135546379	+	0	2	0	0
Chrx	150814861	150816078	150814948	150816006	-	0	6	0	2
Chrx	153694532	153694889	153694633	153694718	+	1	0	0	0
Chrx	153789711	153790851	153789824	153790194	-	0	0	0	3
