# Supplementary material for: Systematic identification and characterization of exon–intron circRNAs
Source: Genome Res. 2024 Mar;34(3):376–93. doi: 10.1101/gr.278590.123 (PMC11067877; doi:10.1101/gr.278590.123)
Supplement: Supplement 2 [file Supplemental_Table_S2.xlsx]

## Sheet: Table S2A. Pipeline_validation
Supplemental Table S2A: List of EIciRNAs in HEK293 cells used for FEICP pipeline validation using qPCR
Genome Assembly: hg19
index	EIciRNA_name	chr	start	end	strand	gene_id	gene_name	gene_type	mean_BSJ_reads_FEICP	mean_Ct_value
1	EIciCAMSAP1	Chr9	138773478	138774924	-	ENSG00000130559	CAMSAP1	protein_coding	184.5	23.983
2	EIciCEP72	Chr5	619104	620376	+	ENSG00000112877	CEP72	protein_coding	36	26.1573
3	EIciPDCD11	Chr10	105197771	105198565	+	ENSG00000148843	PDCD11	protein_coding	24	30.087
4	EIciFKBP8	Chr19	18648410	18649246	-	ENSG00000105701	FKBP8	protein_coding	23.75	26.828
5	EIciPIP5K1C	Chr19	3660963	3661999	-	ENSG00000186111	PIP5K1C	protein_coding	11.25	30.6575
6	EIciPRPSAP1	Chr17	74308950	74309972	-	ENSG00000161542	PRPSAP1	protein_coding	16	29.5747
7	EIciCLK1	Chr2	201721404	201721708	-	ENSG00000013441	CLK1	protein_coding	9.5	31.1015
8	EIciPPME1	Chr11	73914772	73915490	+	ENSG00000214517	PPME1	protein_coding	9	29.77
9	EIciREXO4	Chr9	136277418	136278041	-	ENSG00000148300	REXO4	protein_coding	8.25	30.964
10	EIciHDAC1	Chr1	32792539	32793278	+	ENSG00000116478	HDAC1	protein_coding	6.75	29.669
11	EIciFBF1	Chr17	73933646	73934313	-	ENSG00000188878	FBF1	protein_coding	4.75	29.722
12	EIciXPO1	Chr2	61749745	61753656	-	ENSG00000082898	XPO1	protein_coding	3.25	28.5603
13	EIciAFG3L1P	Chr16	90044085	90045286	+	ENSG00000223959	AFG3L1P	pseudogene	2.75	31.1305
14	EIciPDE8A	Chr15	85657103	85658718	+	ENSG00000073417	PDE8A	protein_coding	2.5	31.011
15	EIciMAP4K3	Chr2	39564060	39564722	-	ENSG00000011566	MAP4K3	protein_coding	2.25	31.3155
16	EIciUBA2	Chr19	34934748	34936026	+	ENSG00000126261	UBA2	protein_coding	1.5	32.8017
17	EIciFANCA	Chr16	89857810	89858955	-	ENSG00000187741	FANCA	protein_coding	1	31.6355
18	EIciPAIP2	Chr5	138699447	138700432	+	ENSG00000120727	PAIP2	protein_coding	0.5	34.52
19	EIciANKLE2	Chr12	133310970	133312098	-	ENSG00000176915	ANKLE2	protein_coding	24.5	27.8347
20	EIciRAB3IP	Chr12	70193988	70195501	+	ENSG00000127328	RAB3IP	protein_coding	22.25	28.9743

## Sheet: Table S2B. RT-PCR of 10 EIciRNA
Supplemental Table S2B: List of 10 EIciRNAs detected by FEICP but missed out by isoCirc in HEK293 cells used for RT-PCR
Genome Assembly: hg19
index	EIciRNA_name	chr	start	end	strand	gene_id	gene_name	gene_type
1	EIciABCC1	Chr16	16126966	16130460	+	ENSG00000103222	ABCC1	protein_coding
2	EIciCAPN15	Chr16	583946	586142	+	ENSG00000103326	CAPN15	protein_coding
3	EIciHERC2	Chr15	28505923	28508315	-	ENSG00000128731	HERC2	protein_coding
4	EIciILKAP	Chr2	239096772	239098613	-	ENSG00000132323	ILKAP	protein_coding
5	EIciJADE2	Chr5	133871548	133873773	+	ENSG00000043143	JADE2	protein_coding
6	EIciKLHDC4	Chr16	87760371	87764250	-	ENSG00000104731	KLHDC4	protein_coding
7	EIciLETM1	Chr4	1834471	1836709	-	ENSG00000168924	LETM1	protein_coding
8	EIciPUM1	Chr1	31465237	31468067	-	ENSG00000134644	PUM1	protein_coding
9	EIciSPEN	Chr1	16199311	16203173	+	ENSG00000065526	SPEN	protein_coding
10	EIciTTL	Chr2	113258783	113260758	+	ENSG00000114999	TTL	protein_coding
