# Supplementary material for: Systematic identification and characterization of exon–intron circRNAs
Source: Genome Res. 2024 Mar;34(3):376–93. doi: 10.1101/gr.278590.123 (PMC11067877; doi:10.1101/gr.278590.123)
Supplement: Supplement 3 [file Supplemental_Table_S3.xlsx]

## Sheet: Table S3. HEK293_LIR
Supplemental Table S3: List of intron retention in linear RNAs (LIR) detected using IRFinder from polyA-plus RNA-seq data of HEK293 cells
						IRratio
Chr	Start	End	Intron_ID	Null	Strand	HEK293_rep1	HEK293_rep2	HEK293_rep3	HEK293_rep4
Chr1	942488	942558	Chr1_942488_942558_+	0	+	0.270622	0.189073	0.292419	0.147287
Chr1	943058	943252	Chr1_943058_943252_+	0	+	0.321627	0.291568	0.34534	0.235977
Chr1	961552	961628	Chr1_961552_961628_+	0	+	0.495798	0.567696	0.587856	0
Chr1	963253	963336	Chr1_963253_963336_+	0	+	0.426684	0	0.356433	0.286953
Chr1	963504	963919	Chr1_963504_963919_+	0	+	0.404954	0.433819	0	0.446685
Chr1	964008	964106	Chr1_964008_964106_+	0	+	0.203825	0.223072	0	0.240293
Chr1	999613	999691	Chr1_999613_999691_-	0	-	0.569084	0.512205	0	0.403231
Chr1	1046265	1046396	Chr1_1046265_1046396_+	0	+	0.159386	0.124562	0.238055	0.110872
Chr1	1084383	1084480	Chr1_1084383_1084480_-	0	-	0.2	0.128197	0	0
Chr1	1298679	1299344	Chr1_1298679_1299344_-	0	-	0.324238	0.437178	0.433979	0.356575
Chr1	1309603	1309680	Chr1_1309603_1309680_+	0	+	0.140584	0	0.154033	0
Chr1	1312368	1312439	Chr1_1312368_1312439_-	0	-	0.152542	0.151838	0	0.180985
Chr1	1312700	1312786	Chr1_1312700_1312786_-	0	-	0.336162	0.335043	0.277611	0.318859
Chr1	1312949	1313034	Chr1_1312949_1313034_-	0	-	0.110781	0.248697	0.239688	0.233139
Chr1	1313124	1313508	Chr1_1313124_1313508_-	0	-	0.161528	0.258662	0.173741	0.201072
Chr1	1313592	1313731	Chr1_1313592_1313731_-	0	-	0.111897	0.198762	0.176471	0
Chr1	1315438	1315519	Chr1_1315438_1315519_-	0	-	0.254056	0.318922	0.378626	0.177677
Chr1	1354509	1354681	Chr1_1354509_1354681_-	0	-	0.296469	0.521588	0.709677	0.348898
Chr1	1355345	1355449	Chr1_1355345_1355449_-	0	-	0.427957	0.511057	0.713208	0
Chr1	1527862	1529222	Chr1_1527862_1529222_+	0	+	0.105977	0	0.125159	0
Chr1	1628179	1628272	Chr1_1628179_1628272_+	0	+	0.361979	0.266326	0.291277	0.249513
Chr1	1669736	1670097	Chr1_1669736_1670097_-	0	-	0.345123	0	0.136667	0
Chr1	1753649	1754050	Chr1_1753649_1754050_-	0	-	0.125069	0.128332	0.126445	0
Chr1	1754208	1754283	Chr1_1754208_1754283_-	0	-	0.118175	0	0.153117	0
Chr1	2515717	2518163	Chr1_2515717_2518163_-	0	-	0.121145	0	0	0
Chr1	3478026	3478423	Chr1_3478026_3478423_+	0	+	0.216677	0.268652	0	0
Chr1	3479590	3479811	Chr1_3479590_3479811_+	0	+	0.125351	0	0	0
Chr1	3631657	3632212	Chr1_3631657_3632212_-	0	-	0.123326	0	0	0
Chr1	3891057	3892882	Chr1_3891057_3892882_-	0	-	0.123905	0	0	0
Chr1	5864033	5864337	Chr1_5864033_5864337_-	0	-	0.182226	0	0	0
Chr1	5864517	5865101	Chr1_5864517_5865101_-	0	-	0.322917	0.205984	0.336828	0.228095
Chr1	5865273	5866372	Chr1_5865273_5866372_-	0	-	0.182622	0	0.153265	0
Chr1	5874657	5874873	Chr1_5874657_5874873_-	0	-	0.181818	0	0	0
Chr1	6218369	6219235	Chr1_6218369_6219235_+	0	+	0.106328	0	0	0
Chr1	6461762	6461993	Chr1_6461762_6461993_-	0	-	0.330827	0	0	0
Chr1	6581299	6582057	Chr1_6581299_6582057_+	0	+	0.193548	0.187898	0.180577	0
Chr1	6586030	6586694	Chr1_6586030_6586694_+	0	+	0.243607	0	0	0
Chr1	6588844	6588915	Chr1_6588844_6588915_+	0	+	0.108138	0	0	0
Chr1	8015384	8015494	Chr1_8015384_8015494_-	0	-	0.121951	0	0	0
Chr1	10365245	10365408	Chr1_10365245_10365408_+	0	+	0.109331	0	0	0
Chr1	11077443	11077600	Chr1_11077443_11077600_-	0	-	0.165178	0.167807	0.168137	0
Chr1	11658393	11658532	Chr1_11658393_11658532_+	0	+	0.577842	0.55901	0.457646	0
Chr1	11836153	11836998	Chr1_11836153_11836998_+	0	+	0.161802	0	0	0
Chr1	11837156	11837342	Chr1_11837156_11837342_+	0	+	0.1	0	0	0
Chr1	12029894	12030027	Chr1_12029894_12030027_+	0	+	0.187182	0.212963	0.131953	0.261029
Chr1	15727832	15728078	Chr1_15727832_15728078_+	0	+	0.133052	0	0	0
Chr1	15938006	15938717	Chr1_15938006_15938717_+	0	+	0.171679	0.131	0	0.125951
Chr1	15938876	15939295	Chr1_15938876_15939295_+	0	+	0.103121	0	0	0
Chr1	15943715	15943807	Chr1_15943715_15943807_-	0	-	0.190476	0.334176	0.367089	0
Chr1	15943895	15944299	Chr1_15943895_15944299_-	0	-	0.130645	0	0	0
Chr1	15947123	15948290	Chr1_15947123_15948290_-	0	-	0.241573	0	0	0
Chr1	18874581	18875381	Chr1_18874581_18875381_-	0	-	0.107625	0	0	0
Chr1	20648632	20648994	Chr1_20648632_20648994_+	0	+	0.171383	0	0	0
Chr1	22501684	22502298	Chr1_22501684_22502298_+	0	+	0.454033	0.447173	0.285392	0.378203
Chr1	23438834	23439160	Chr1_23438834_23439160_-	0	-	0.120507	0	0	0.114333
Chr1	23441730	23442185	Chr1_23441730_23442185_-	0	-	0.137765	0	0	0
Chr1	23794600	23794681	Chr1_23794600_23794681_+	0	+	0.127273	0	0.23634	0.148847
Chr1	23796586	23796696	Chr1_23796586_23796696_-	0	-	0.133574	0	0	0
Chr1	23978273	23978652	Chr1_23978273_23978652_-	0	-	0.116113	0	0	0
Chr1	26284482	26285463	Chr1_26284482_26285463_-	0	-	0.433191	0.528587	0.496345	0
Chr1	26892791	26893388	Chr1_26892791_26893388_-	0	-	0.117881	0	0	0
Chr1	27350952	27351257	Chr1_27350952_27351257_+	0	+	0.607045	0	0	0
Chr1	27355469	27355668	Chr1_27355469_27355668_-	0	-	0.117647	0	0	0
Chr1	27357114	27357399	Chr1_27357114_27357399_-	0	-	0.184139	0	0	0
Chr1	27963693	27966502	Chr1_27963693_27966502_+	0	+	0.100902	0	0	0
Chr1	29196258	29200515	Chr1_29196258_29200515_-	0	-	0.108954	0	0	0
Chr1	30877165	30878622	Chr1_30877165_30878622_-	0	-	0.11805	0	0	0
Chr1	31424873	31425329	Chr1_31424873_31425329_+	0	+	0.130855	0	0	0
Chr1	31731419	31732114	Chr1_31731419_31732114_-	0	-	0.161585	0	0	0
Chr1	31736723	31737428	Chr1_31736723_31737428_-	0	-	0.108016	0	0.153263	0
Chr1	32206761	32207001	Chr1_32206761_32207001_+	0	+	0.235646	0	0	0
Chr1	32216947	32217258	Chr1_32216947_32217258_-	0	-	0.273546	0.132428	0.137767	0.186051
Chr1	32327677	32329067	Chr1_32327677_32329067_+	0	+	0.205156	0.134405	0	0.172962
Chr1	32329160	32330577	Chr1_32329160_32330577_+	0	+	0.161938	0.119845	0	0
Chr1	35014888	35014987	Chr1_35014888_35014987_-	0	-	0.166667	0	0	0
Chr1	35557883	35558155	Chr1_35557883_35558155_+	0	+	0.583824	0	0	0
Chr1	35832185	35832436	Chr1_35832185_35832436_+	0	+	0.131019	0	0	0
Chr1	36013752	36013914	Chr1_36013752_36013914_+	0	+	0.1	0	0	0
Chr1	36091825	36091909	Chr1_36091825_36091909_+	0	+	0.102564	0	0	0
Chr1	36176321	36176417	Chr1_36176321_36176417_+	0	+	0.770476	0.838157	0.873751	0.724967
Chr1	36319312	36319441	Chr1_36319312_36319441_+	0	+	0.153846	0	0	0
Chr1	36320798	36320914	Chr1_36320798_36320914_+	0	+	0.2	0	0	0
Chr1	36323067	36323458	Chr1_36323067_36323458_-	0	-	0.10073	0.128683	0	0
Chr1	39563741	39563835	Chr1_39563741_39563835_-	0	-	0.139584	0.104721	0.108255	0
Chr1	39854068	39857276	Chr1_39854068_39857276_-	0	-	0.186904	0	0	0
Chr1	39967711	39967803	Chr1_39967711_39967803_+	0	+	0.307692	0	0	0.105263
Chr1	40489624	40494920	Chr1_40489624_40494920_+	0	+	0.185863	0	0	0
Chr1	41008714	41008793	Chr1_41008714_41008793_+	0	+	0.15644	0.102731	0.113619	0.21374
Chr1	42747412	42747722	Chr1_42747412_42747722_-	0	-	0.116719	0	0	0
Chr1	42754990	42755164	Chr1_42754990_42755164_-	0	-	0.271293	0.149737	0.251602	0
Chr1	43426809	43427055	Chr1_43426809_43427055_+	0	+	0.128153	0	0.134199	0
Chr1	43442368	43442441	Chr1_43442368_43442441_+	0	+	0.105263	0	0	0
Chr1	43452013	43452204	Chr1_43452013_43452204_-	0	-	0.134322	0	0.187708	0
Chr1	43964321	43966574	Chr1_43964321_43966574_+	0	+	0.110914	0	0	0
Chr1	43971189	43971386	Chr1_43971189_43971386_+	0	+	0.113164	0.180343	0.170084	0
Chr1	43972334	43972414	Chr1_43972334_43972414_+	0	+	0.105263	0	0.158749	0
Chr1	43995856	43995937	Chr1_43995856_43995937_+	0	+	0.133333	0	0	0
Chr1	44636457	44645359	Chr1_44636457_44645359_-	0	-	0.209787	0	0	0.322565
Chr1	45009683	45009985	Chr1_45009683_45009985_-	0	-	0.116766	0	0	0
Chr1	45013215	45013291	Chr1_45013215_45013291_+	0	+	0.114337	0.126639	0.109376	0
Chr1	45013791	45013908	Chr1_45013791_45013908_+	0	+	0.104629	0.12511	0.127313	0
Chr1	45331849	45332022	Chr1_45331849_45332022_-	0	-	0.307815	0	0.246253	0
Chr1	45332086	45332165	Chr1_45332086_45332165_-	0	-	0.121212	0	0	0
Chr1	45332310	45332390	Chr1_45332310_45332390_-	0	-	0.121212	0.182674	0	0.265141
Chr1	45332687	45332762	Chr1_45332687_45332762_-	0	-	0.142857	0.210444	0	0
Chr1	45332834	45332917	Chr1_45332834_45332917_-	0	-	0.326087	0	0	0
Chr1	45341343	45341472	Chr1_45341343_45341472_+	0	+	0.255319	0	0	0
Chr1	45346779	45346978	Chr1_45346779_45346978_-	0	-	0.153071	0	0.18259	0
Chr1	46189357	46189457	Chr1_46189357_46189457_-	0	-	0.117917	0.100996	0	0
Chr1	46190517	46190719	Chr1_46190517_46190719_-	0	-	0.113208	0	0	0
Chr1	46260611	46260726	Chr1_46260611_46260726_+	0	+	0.135678	0.102671	0	0
Chr1	46272540	46272671	Chr1_46272540_46272671_+	0	+	0.186047	0	0	0
Chr1	46413220	46413446	Chr1_46413220_46413446_+	0	+	0.121882	0	0	0
Chr1	47299968	47300109	Chr1_47299968_47300109_-	0	-	0.774331	0.766813	0.749853	0.869672
Chr1	51311321	51312118	Chr1_51311321_51312118_-	0	-	0.115665	0	0	0
Chr1	52353223	52353517	Chr1_52353223_52353517_-	0	-	0.421348	0.222837	0	0
Chr1	52357898	52358330	Chr1_52357898_52358330_-	0	-	0.237785	0	0	0
Chr1	56691487	56692357	Chr1_56691487_56692357_+	0	+	0.134809	0	0	0
Chr1	62116679	62117131	Chr1_62116679_62117131_+	0	+	0.255619	0	0	0
Chr1	64804838	64804990	Chr1_64804838_64804990_+	0	+	0.115166	0	0	0
Chr1	64805105	64807205	Chr1_64805105_64807205_+	0	+	0.19803	0.189439	0	0
Chr1	67004448	67009084	Chr1_67004448_67009084_-	0	-	0.117675	0	0	0
Chr1	70433949	70435124	Chr1_70433949_70435124_+	0	+	0.134068	0	0	0
Chr1	71069362	71070826	Chr1_71069362_71070826_-	0	-	0.126029	0	0.11692	0
Chr1	77944269	77945505	Chr1_77944269_77945505_-	0	-	0.892332	0.717514	0.78471	0.830651
Chr1	84929679	84931361	Chr1_84929679_84931361_-	0	-	0.339301	0.38954	0	0
Chr1	95246657	95246755	Chr1_95246657_95246755_+	0	+	0.135077	0	0	0.107551
Chr1	109270133	109270425	Chr1_109270133_109270425_+	0	+	0.22827	0.125071	0	0
Chr1	109491717	109492585	Chr1_109491717_109492585_+	0	+	0.1	0	0	0
Chr1	109625433	109625661	Chr1_109625433_109625661_+	0	+	0.12	0	0	0
Chr1	109627316	109627428	Chr1_109627316_109627428_+	0	+	0.243243	0.114124	0	0.15493
Chr1	109669571	109671286	Chr1_109669571_109671286_+	0	+	0.133051	0	0	0
Chr1	110037960	110038682	Chr1_110037960_110038682_+	0	+	0.11683	0	0	0
Chr1	110038757	110039171	Chr1_110038757_110039171_+	0	+	0.124719	0	0	0
Chr1	110047869	110049111	Chr1_110047869_110049111_+	0	+	0.155556	0	0	0
Chr1	110049238	110049459	Chr1_110049238_110049459_+	0	+	0.133263	0	0.140351	0
Chr1	112699982	112700218	Chr1_112699982_112700218_+	0	+	0.145409	0.138201	0.140017	0
Chr1	112711071	112711265	Chr1_112711071_112711265_-	0	-	0.1	0	0	0
Chr1	113896465	113897839	Chr1_113896465_113897839_-	0	-	0.10876	0	0	0
Chr1	113898801	113899903	Chr1_113898801_113899903_-	0	-	0.16802	0	0	0
Chr1	113900400	113901235	Chr1_113900400_113901235_-	0	-	0.110898	0	0	0
Chr1	113901383	113901754	Chr1_113901383_113901754_-	0	-	0.102167	0	0	0
Chr1	117113485	117115574	Chr1_117113485_117115574_-	0	-	0.140843	0	0	0
Chr1	145856431	145856588	Chr1_145856431_145856588_-	0	-	0.188166	0	0	0.153024
Chr1	147267518	147268781	Chr1_147267518_147268781_+	0	+	0.12153	0.111339	0	0
Chr1	147647566	147648245	Chr1_147647566_147648245_-	0	-	0.194716	0	0.245045	0.342757
Chr1	149906856	149907699	Chr1_149906856_149907699_-	0	-	0.101475	0	0.129588	0.284327
Chr1	150076312	150076915	Chr1_150076312_150076915_+	0	+	0.115721	0	0	0
Chr1	150504435	150504631	Chr1_150504435_150504631_+	0	+	0.192147	0	0	0
Chr1	150504733	150504905	Chr1_150504733_150504905_+	0	+	0.139729	0.134831	0.125894	0
Chr1	150509581	150509660	Chr1_150509581_150509660_+	0	+	0.1	0	0	0
Chr1	150963139	150963529	Chr1_150963139_150963529_+	0	+	0.183081	0.10444	0.125795	0
Chr1	151369189	151369441	Chr1_151369189_151369441_-	0	-	0.284211	0	0	0
Chr1	151369554	151369712	Chr1_151369554_151369712_-	0	-	0.207109	0.215401	0.107283	0
Chr1	151442205	151459151	Chr1_151442205_151459151_-	0	-	0.114555	0	0	0
Chr1	151535131	151535599	Chr1_151535131_151535599_+	0	+	0.125	0	0	0
Chr1	153747363	153748688	Chr1_153747363_153748688_+	0	+	0.26594	0	0	0
Chr1	153772440	153772638	Chr1_153772440_153772638_+	0	+	0.164752	0	0	0
Chr1	153932777	153932860	Chr1_153932777_153932860_-	0	-	0.125588	0	0.138185	0
Chr1	153934964	153936059	Chr1_153934964_153936059_-	0	-	0.121325	0	0	0
Chr1	153939804	153940155	Chr1_153939804_153940155_-	0	-	0.162832	0	0	0
Chr1	153972836	153972971	Chr1_153972836_153972971_+	0	+	0.365145	0	0	0
Chr1	153973078	153973194	Chr1_153973078_153973194_+	0	+	0.205298	0	0	0
Chr1	153973464	153973619	Chr1_153973464_153973619_+	0	+	0.214497	0	0	0
Chr1	153977389	153977543	Chr1_153977389_153977543_-	0	-	0.985502	0.99171	0	0.978944
Chr1	154345545	154345799	Chr1_154345545_154345799_+	0	+	0.122892	0	0	0
Chr1	154602248	154602384	Chr1_154602248_154602384_-	0	-	0.933321	0.910491	0.940175	0.887801
Chr1	154990257	154990338	Chr1_154990257_154990338_+	0	+	0.260942	0	0.278863	0.278008
Chr1	155054506	155055789	Chr1_155054506_155055789_+	0	+	0.118351	0	0	0
Chr1	155055852	155055931	Chr1_155055852_155055931_+	0	+	0.226918	0	0.124941	0
Chr1	155056249	155056385	Chr1_155056249_155056385_+	0	+	0.164083	0.147743	0.159112	0.13068
Chr1	155067016	155067371	Chr1_155067016_155067371_+	0	+	0.136646	0	0	0
Chr1	155133568	155133729	Chr1_155133568_155133729_+	0	+	0.153397	0.153606	0	0
Chr1	155195899	155195986	Chr1_155195899_155195986_-	0	-	0.230769	0	0.2	0
Chr1	155197213	155197462	Chr1_155197213_155197462_-	0	-	0.434951	0.46986	0	0.546536
Chr1	155197659	155197879	Chr1_155197659_155197879_-	0	-	0.21658	0	0	0
Chr1	155203137	155203222	Chr1_155203137_155203222_-	0	-	0.230769	0.157895	0	0
Chr1	155203305	155203512	Chr1_155203305_155203512_-	0	-	0.3	0	0	0.166667
Chr1	155612975	155613048	Chr1_155612975_155613048_+	0	+	0.109375	0.15515	0	0.121363
Chr1	155752587	155753203	Chr1_155752587_155753203_-	0	-	0.242906	0	0	0.269016
Chr1	155753414	155754374	Chr1_155753414_155754374_-	0	-	0.316993	0.181774	0.202764	0.325216
Chr1	156077354	156077467	Chr1_156077354_156077467_-	0	-	0.780472	0.717056	0.690425	0.613266
Chr1	156138757	156139079	Chr1_156138757_156139079_+	0	+	0.14077	0	0	0
Chr1	156242591	156242761	Chr1_156242591_156242761_+	0	+	0.10231	0	0	0
Chr1	156467656	156467992	Chr1_156467656_156467992_-	0	-	0.460123	0	0	0
Chr1	156535247	156537180	Chr1_156535247_156537180_-	0	-	0.139007	0	0.230973	0.101882
Chr1	158091556	158093338	Chr1_158091556_158093338_+	0	+	0.181584	0	0	0
Chr1	161099062	161099345	Chr1_161099062_161099345_+	0	+	0.408788	0.161924	0	0
Chr1	161160506	161160619	Chr1_161160506_161160619_+	0	+	0.110484	0	0	0
Chr1	161162726	161162918	Chr1_161162726_161162918_+	0	+	0.146406	0.116296	0.250127	0
Chr1	161164250	161164533	Chr1_161164250_161164533_+	0	+	0.152801	0.163747	0.279121	0
Chr1	161164612	161164834	Chr1_161164612_161164834_+	0	+	0.310455	0.281804	0.359738	0.321666
Chr1	161164942	161165028	Chr1_161164942_161165028_+	0	+	0.266403	0	0.212192	0.134349
Chr1	161169720	161169905	Chr1_161169720_161169905_+	0	+	0.243876	0.25243	0	0.320574
Chr1	161170024	161170408	Chr1_161170024_161170408_+	0	+	0.329609	0	0.155578	0
Chr1	161170769	161170906	Chr1_161170769_161170906_+	0	+	0.212017	0	0	0.111111
Chr1	161170949	161171033	Chr1_161170949_161171033_+	0	+	0.199288	0.178571	0.25	0
Chr1	166846738	166847493	Chr1_166846738_166847493_+	0	+	0.119248	0	0	0
Chr1	169465977	169468110	Chr1_169465977_169468110_-	0	-	0.180369	0	0	0
Chr1	169862797	169864368	Chr1_169862797_169864368_-	0	-	0.160254	0	0	0
Chr1	171709744	171710713	Chr1_171709744_171710713_-	0	-	0.176177	0	0	0.115182
Chr1	180111195	180112436	Chr1_180111195_180112436_+	0	+	0.783582	0.769087	0.727129	0.825846
Chr1	180271534	180271834	Chr1_180271534_180271834_+	0	+	0.715599	0.788812	0	0.660377
Chr1	183964020	183969268	Chr1_183964020_183969268_-	0	-	0.167931	0	0	0
Chr1	201812661	201813139	Chr1_201812661_201813139_+	0	+	0.119782	0	0	0
Chr1	202333093	202333236	Chr1_202333093_202333236_-	0	-	0.100838	0	0	0
Chr1	205523297	205523482	Chr1_205523297_205523482_+	0	+	0.264793	0	0.351598	0
Chr1	205798815	205798956	Chr1_205798815_205798956_-	0	-	0.140752	0.176471	0	0
Chr1	212358787	212360637	Chr1_212358787_212360637_+	0	+	0.131968	0	0	0
Chr1	212618234	212619357	Chr1_212618234_212619357_+	0	+	0.139666	0	0	0
Chr1	212885396	212887890	Chr1_212885396_212887890_+	0	+	0.103615	0	0	0
Chr1	225856738	225856910	Chr1_225856738_225856910_-	0	-	0.105263	0	0	0
Chr1	225866682	225867111	Chr1_225866682_225867111_-	0	-	0.273035	0.591873	0.256177	0
Chr1	227733027	227733413	Chr1_227733027_227733413_-	0	-	0.310938	0.216069	0	0
Chr1	227733681	227733906	Chr1_227733681_227733906_-	0	-	0.105133	0	0	0
Chr1	232984477	232986091	Chr1_232984477_232986091_-	0	-	0.401163	0	0	0
Chr1	234472811	234478172	Chr1_234472811_234478172_-	0	-	0.198237	0.113987	0	0.190175
Chr1	235175399	235177799	Chr1_235175399_235177799_-	0	-	0.12349	0	0	0
Chr10	3148063	3148170	Chr10_3148063_3148170_-	0	-	0.105328	0.108742	0	0.111732
Chr10	5924508	5925366	Chr10_5924508_5925366_+	0	+	0.109781	0	0	0
Chr10	24596043	24596739	Chr10_24596043_24596739_-	0	-	0.109314	0	0	0
Chr10	26166178	26168711	Chr10_26166178_26168711_+	0	+	0.107442	0	0	0
Chr10	27533853	27533927	Chr10_27533853_27533927_+	0	+	0.110604	0	0	0.117647
Chr10	27675415	27675520	Chr10_27675415_27675520_-	0	-	0.16	0	0	0
Chr10	30437406	30438915	Chr10_30437406_30438915_+	0	+	0.124553	0.132734	0	0
Chr10	37831312	37833024	Chr10_37831312_37833024_-	0	-	0.495537	0	0	0
Chr10	43199194	43199675	Chr10_43199194_43199675_-	0	-	0.164948	0	0	0.114388
Chr10	43644801	43646063	Chr10_43644801_43646063_-	0	-	0.125658	0	0	0
Chr10	44984113	44984812	Chr10_44984113_44984812_+	0	+	0.109038	0	0	0
Chr10	49738072	49738190	Chr10_49738072_49738190_-	0	-	0.352941	0	0	0.363636
Chr10	49744752	49745343	Chr10_49744752_49745343_-	0	-	0.135582	0	0	0
Chr10	56358185	56358376	Chr10_56358185_56358376_-	0	-	0.233857	0.252675	0.23485	0.249807
Chr10	56359853	56360017	Chr10_56359853_56360017_-	0	-	0.210917	0.158571	0.134484	0.149795
Chr10	69631547	69631708	Chr10_69631547_69631708_+	0	+	0.199921	0	0	0
Chr10	70140141	70142667	Chr10_70140141_70142667_-	0	-	0.19264	0	0	0
Chr10	73234940	73235192	Chr10_73234940_73235192_+	0	+	0.27482	0	0.187396	0.21804
Chr10	73797014	73797112	Chr10_73797014_73797112_+	0	+	0.193342	0.165928	0.359551	0.146392
Chr10	75234992	75235059	Chr10_75234992_75235059_-	0	-	0.221154	0.273684	0.404145	0.28866
Chr10	97452923	97453529	Chr10_97452923_97453529_+	0	+	0.111353	0	0	0
Chr10	97748364	97749473	Chr10_97748364_97749473_+	0	+	0.109915	0	0	0
Chr10	99716461	99718345	Chr10_99716461_99718345_-	0	-	0.250139	0	0	0
Chr10	100488974	100489251	Chr10_100488974_100489251_-	0	-	0.72598	0	0	0
Chr10	100489398	100489702	Chr10_100489398_100489702_-	0	-	0.830032	0.581313	0.802676	0.646644
Chr10	100979018	100979101	Chr10_100979018_100979101_+	0	+	0.525813	0.428571	0.369064	0.358067
Chr10	100979992	100980121	Chr10_100979992_100980121_+	0	+	0.210473	0.227273	0	0.125
Chr10	100980693	100980821	Chr10_100980693_100980821_+	0	+	0.21654	0.411177	0	0
Chr10	100984357	100984489	Chr10_100984357_100984489_+	0	+	0.455634	0.452902	0.608457	0
Chr10	101064421	101064500	Chr10_101064421_101064500_+	0	+	0.100775	0	0	0.115254
Chr10	101064648	101064825	Chr10_101064648_101064825_+	0	+	0.179768	0	0	0
Chr10	101584919	101585315	Chr10_101584919_101585315_-	0	-	0.126002	0.1494	0	0
Chr10	102147392	102148371	Chr10_102147392_102148371_+	0	+	0.10877	0	0	0
Chr10	102148521	102148627	Chr10_102148521_102148627_+	0	+	0.123069	0.125378	0.112058	0
Chr10	102379954	102380248	Chr10_102379954_102380248_+	0	+	0.252097	0.192704	0	0
Chr10	102471117	102471272	Chr10_102471117_102471272_+	0	+	0.125	0	0	0
Chr10	102731783	102732151	Chr10_102731783_102732151_+	0	+	0.267319	0	0	0
Chr10	102732218	102732858	Chr10_102732218_102732858_+	0	+	0.234415	0.301617	0	0
Chr10	112433281	112434296	Chr10_112433281_112434296_-	0	-	0.401271	0	0.214505	0.321494
Chr10	113901897	113902470	Chr10_113901897_113902470_+	0	+	0.107053	0	0	0
Chr10	114846367	114846558	Chr10_114846367_114846558_+	0	+	0.100784	0	0	0
Chr10	119576750	119577079	Chr10_119576750_119577079_-	0	-	0.263472	0.214544	0.104735	0.18738
Chr10	119823199	119823814	Chr10_119823199_119823814_+	0	+	0.101871	0	0	0
Chr10	120905416	120905875	Chr10_120905416_120905875_+	0	+	0.195622	0.175181	0	0
Chr10	120906021	120906775	Chr10_120906021_120906775_+	0	+	0.31471	0	0	0
Chr10	121959410	121959500	Chr10_121959410_121959500_-	0	-	0.142981	0.205856	0.183124	0.148176
Chr10	122986962	122990173	Chr10_122986962_122990173_+	0	+	0.160282	0	0	0
Chr10	122994723	122995993	Chr10_122994723_122995993_-	0	-	0.126972	0	0	0
Chr10	131968569	131970637	Chr10_131968569_131970637_-	0	-	0.160974	0.120696	0	0
Chr10	133401590	133402148	Chr10_133401590_133402148_+	0	+	0.255625	0.387701	0.333633	0.356579
Chr11	205469	205610	Chr11_205469_205610_-	0	-	0.171429	0	0.240559	0.10925
Chr11	212759	212836	Chr11_212759_212836_+	0	+	0.169014	0.165141	0.122961	0
Chr11	293502	293593	Chr11_293502_293593_+	0	+	0.447489	0.485211	0.477186	0
Chr11	293925	294098	Chr11_293925_294098_+	0	+	0.157415	0	0	0.185847
Chr11	373116	373190	Chr11_373116_373190_+	0	+	0.130699	0.151335	0	0
Chr11	375773	375846	Chr11_375773_375846_+	0	+	0.185155	0.30059	0.384658	0.240528
Chr11	400451	400534	Chr11_400451_400534_+	0	+	0.104046	0	0	0
Chr11	488647	489399	Chr11_488647_489399_+	0	+	0.124765	0	0	0
Chr11	532522	532630	Chr11_532522_532630_-	0	-	0.273553	0.276353	0.289651	0
Chr11	551827	551902	Chr11_551827_551902_+	0	+	0.187291	0	0	0
Chr11	613865	613950	Chr11_613865_613950_-	0	-	0.272016	0.378342	0.12758	0
Chr11	614399	614475	Chr11_614399_614475_-	0	-	0.217204	0	0.264368	0.111111
Chr11	709608	710421	Chr11_709608_710421_+	0	+	0.10153	0	0	0.104668
Chr11	721991	722090	Chr11_721991_722090_+	0	+	0.277778	0.353005	0.238567	0.289404
Chr11	770903	770992	Chr11_770903_770992_-	0	-	0.530697	0.450763	0.442019	0.32377
Chr11	802090	802194	Chr11_802090_802194_-	0	-	0.120214	0.118625	0.150135	0
Chr11	865614	865693	Chr11_865614_865693_+	0	+	0.112245	0.162132	0.132418	0
Chr11	2402652	2402844	Chr11_2402652_2402844_+	0	+	0.949272	0.949978	0.954768	0
Chr11	2922203	2922435	Chr11_2922203_2922435_+	0	+	0.149485	0	0	0
Chr11	3002053	3002540	Chr11_3002053_3002540_-	0	-	0.2658	0.194884	0.123949	0
Chr11	3018511	3018619	Chr11_3018511_3018619_-	0	-	0.1	0	0	0
Chr11	3824135	3824269	Chr11_3824135_3824269_+	0	+	0.224624	0.196002	0	0.138078
Chr11	5608394	5610144	Chr11_5608394_5610144_+	0	+	0.141126	0.102652	0	0
Chr11	5610561	5610776	Chr11_5610561_5610776_+	0	+	0.25	0	0.130435	0.17994
Chr11	6480068	6480322	Chr11_6480068_6480322_-	0	-	0.108804	0	0	0
Chr11	6608967	6609070	Chr11_6608967_6609070_+	0	+	0.187485	0	0	0
Chr11	6611452	6611663	Chr11_6611452_6611663_-	0	-	0.124605	0	0	0
Chr11	6616503	6616660	Chr11_6616503_6616660_-	0	-	0.138035	0	0.190621	0
Chr11	8699390	8702571	Chr11_8699390_8702571_-	0	-	0.126768	0	0.139454	0.121867
Chr11	9281041	9283370	Chr11_9281041_9283370_-	0	-	0.852543	0	0	0
Chr11	10855086	10856143	Chr11_10855086_10856143_-	0	-	0.348595	0.302274	0	0.283946
Chr11	13385791	13386595	Chr11_13385791_13386595_+	0	+	0.113177	0	0	0
Chr11	14513887	14514402	Chr11_14513887_14514402_-	0	-	0.103221	0	0	0
Chr11	16782896	16783699	Chr11_16782896_16783699_-	0	-	0.215638	0	0	0
Chr11	18081503	18083534	Chr11_18081503_18083534_-	0	-	0.105875	0	0	0
Chr11	22276199	22279543	Chr11_22276199_22279543_+	0	+	0.116494	0	0	0
Chr11	33027813	33028602	Chr11_33027813_33028602_+	0	+	0.129968	0.131832	0	0.157431
Chr11	33141762	33141884	Chr11_33141762_33141884_-	0	-	0.215653	0	0	0.149601
Chr11	34152584	34154264	Chr11_34152584_34154264_-	0	-	0.103177	0	0	0
Chr11	34154378	34154700	Chr11_34154378_34154700_-	0	-	0.127357	0.2273	0.163022	0.167951
Chr11	34992379	34994913	Chr11_34992379_34994913_+	0	+	0.218358	0	0.119642	0
Chr11	43882731	43883084	Chr11_43882731_43883084_+	0	+	0.119477	0.113089	0	0
Chr11	44075592	44077278	Chr11_44075592_44077278_+	0	+	0.393971	0	0	0
Chr11	44078784	44079530	Chr11_44078784_44079530_+	0	+	0.630988	0.503988	0	0
Chr11	44081320	44083168	Chr11_44081320_44083168_+	0	+	0.191505	0	0	0
Chr11	44083577	44083694	Chr11_44083577_44083694_+	0	+	0.510079	0.510919	0	0
Chr11	45914203	45914315	Chr11_45914203_45914315_-	0	-	0.112051	0.115789	0.176218	0.225557
Chr11	45926597	45926710	Chr11_45926597_45926710_+	0	+	0.153846	0	0.226966	0
Chr11	46379236	46379468	Chr11_46379236_46379468_+	0	+	0.158628	0.14533	0.140453	0
Chr11	46542981	46543251	Chr11_46542981_46543251_-	0	-	0.412903	0.473707	0	0
Chr11	46702765	46702983	Chr11_46702765_46702983_+	0	+	0.103578	0	0	0
Chr11	47234672	47234756	Chr11_47234672_47234756_+	0	+	0.159878	0.131854	0.193382	0
Chr11	47234934	47235269	Chr11_47234934_47235269_+	0	+	0.160194	0.139348	0	0
Chr11	47261449	47261546	Chr11_47261449_47261546_+	0	+	0.184862	0.387755	0	0
Chr11	47415159	47415287	Chr11_47415159_47415287_+	0	+	0.280719	0.173284	0.256966	0
Chr11	47565796	47565905	Chr11_47565796_47565905_+	0	+	0.41935	0.458998	0.416486	0.34858
Chr11	57738430	57738663	Chr11_57738430_57738663_+	0	+	0.131576	0	0	0
Chr11	60931884	60931983	Chr11_60931884_60931983_+	0	+	0.15014	0	0	0.189992
Chr11	61134207	61138736	Chr11_61134207_61138736_-	0	-	0.182958	0	0	0
Chr11	61366216	61367922	Chr11_61366216_61367922_+	0	+	0.147626	0	0	0.11394
Chr11	61415784	61416104	Chr11_61415784_61416104_-	0	-	0.109602	0	0	0
Chr11	61783600	61783850	Chr11_61783600_61783850_+	0	+	0.147298	0	0	0
Chr11	61796396	61796921	Chr11_61796396_61796921_+	0	+	0.987484	0	0	0.986266
Chr11	62576244	62576656	Chr11_62576244_62576656_-	0	-	0.269424	0.178069	0.180628	0
Chr11	62576749	62576906	Chr11_62576749_62576906_-	0	-	0.114176	0	0	0
Chr11	62577017	62577181	Chr11_62577017_62577181_-	0	-	0.175353	0	0.101449	0
Chr11	62577291	62578560	Chr11_62577291_62578560_-	0	-	0.109162	0	0.176385	0.138925
Chr11	62602889	62603148	Chr11_62602889_62603148_-	0	-	0.134904	0	0.274666	0.149623
Chr11	62604041	62604112	Chr11_62604041_62604112_-	0	-	0.17486	0.188679	0	0
Chr11	62604201	62605112	Chr11_62604201_62605112_-	0	-	0.1203	0	0.193094	0
Chr11	62669803	62669881	Chr11_62669803_62669881_-	0	-	0.539652	0.351779	0.519126	0.470523
Chr11	62671865	62671952	Chr11_62671865_62671952_+	0	+	0.158523	0	0.165295	0.312733
Chr11	62782333	62782692	Chr11_62782333_62782692_+	0	+	0.212291	0	0	0.184356
Chr11	62786388	62786516	Chr11_62786388_62786516_+	0	+	0.188986	0.118921	0	0
Chr11	62789426	62789600	Chr11_62789426_62789600_+	0	+	0.106189	0	0	0
Chr11	63998687	63998837	Chr11_63998687_63998837_-	0	-	0.129187	0.182613	0.182925	0.17768
Chr11	63998872	63998954	Chr11_63998872_63998954_-	0	-	0.187817	0.182193	0.239715	0.206381
Chr11	64224341	64224542	Chr11_64224341_64224542_-	0	-	0.142601	0.149767	0.151765	0
Chr11	64229344	64229477	Chr11_64229344_64229477_+	0	+	0.152174	0	0	0
Chr11	64233980	64234072	Chr11_64233980_64234072_+	0	+	0.560724	0.460223	0	0.54433
Chr11	64266404	64266494	Chr11_64266404_64266494_+	0	+	0.166667	0	0	0
Chr11	64266552	64267184	Chr11_64266552_64267184_+	0	+	0.130219	0	0	0
Chr11	64792086	64792171	Chr11_64792086_64792171_-	0	-	0.106996	0	0	0
Chr11	64807680	64807890	Chr11_64807680_64807890_-	0	-	0.179405	0.107232	0.124689	0.143254
Chr11	64895209	64895289	Chr11_64895209_64895289_-	0	-	0.204545	0	0	0
Chr11	64895442	64896461	Chr11_64895442_64896461_-	0	-	0.334038	0.207645	0.173876	0
Chr11	64931489	64931558	Chr11_64931489_64931558_+	0	+	0.370155	0.302184	0.276527	0.234069
Chr11	65132351	65132731	Chr11_65132351_65132731_-	0	-	0.187417	0.152068	0.174356	0.105939
Chr11	65538324	65538441	Chr11_65538324_65538441_+	0	+	0.14947	0.143171	0	0.117356
Chr11	65584398	65584485	Chr11_65584398_65584485_+	0	+	0.209184	0	0	0.148148
Chr11	65607513	65607640	Chr11_65607513_65607640_-	0	-	0.101911	0	0	0
Chr11	65617509	65617610	Chr11_65617509_65617610_+	0	+	0.14994	0.16945	0.15509	0.129585
Chr11	65626054	65626903	Chr11_65626054_65626903_+	0	+	0.207175	0	0	0.101251
Chr11	65630604	65634125	Chr11_65630604_65634125_+	0	+	0.128338	0.106085	0	0
Chr11	65635803	65636173	Chr11_65635803_65636173_+	0	+	0.117057	0	0	0
Chr11	65718954	65719046	Chr11_65718954_65719046_+	0	+	0.360371	0.37015	0.338474	0.47795
Chr11	65863721	65863803	Chr11_65863721_65863803_+	0	+	0.152921	0.162244	0.160356	0.126426
Chr11	65864815	65865016	Chr11_65864815_65865016_+	0	+	0.257287	0.393777	0.276441	0.412422
Chr11	65865145	65865219	Chr11_65865145_65865219_+	0	+	0.166364	0	0.183921	0.240394
Chr11	66364424	66365935	Chr11_66364424_66365935_-	0	-	0.147232	0.172801	0	0.116256
Chr11	66366021	66366125	Chr11_66366021_66366125_-	0	-	0.157616	0.211592	0	0
Chr11	66523576	66523723	Chr11_66523576_66523723_+	0	+	0.293059	0	0.187403	0.136364
Chr11	66599253	66599458	Chr11_66599253_66599458_+	0	+	0.647546	0.441541	0	0.607337
Chr11	66688849	66689095	Chr11_66688849_66689095_-	0	-	0.129032	0	0	0
Chr11	66814015	66816052	Chr11_66814015_66816052_+	0	+	0.1073	0	0	0
Chr11	66838445	66842848	Chr11_66838445_66842848_+	0	+	0.209574	0	0	0.122884
Chr11	66858269	66858335	Chr11_66858269_66858335_-	0	-	0.935915	0.969565	0.945686	0.898383
Chr11	67284983	67285074	Chr11_67284983_67285074_+	0	+	0.13625	0.12984	0.126821	0.156081
Chr11	67306962	67307041	Chr11_67306962_67307041_+	0	+	0.213026	0	0.346542	0
Chr11	67307113	67307370	Chr11_67307113_67307370_+	0	+	0.207724	0.425421	0	0
Chr11	67396175	67396262	Chr11_67396175_67396262_+	0	+	0.149672	0	0	0
Chr11	67493837	67493921	Chr11_67493837_67493921_-	0	-	0.217687	0.277814	0.399727	0.473068
Chr11	67497679	67497916	Chr11_67497679_67497916_-	0	-	0.100124	0	0	0
Chr11	67628251	67628322	Chr11_67628251_67628322_-	0	-	0.208253	0	0.255024	0.134845
Chr11	68043031	68043370	Chr11_68043031_68043370_+	0	+	0.714697	0.637877	0.84669	0.661127
Chr11	68043497	68043570	Chr11_68043497_68043570_+	0	+	0.205882	0.2	0	0
Chr11	68047804	68047881	Chr11_68047804_68047881_+	0	+	0.290076	0.34375	0.526602	0.492832
Chr11	68049294	68049662	Chr11_68049294_68049662_+	0	+	0.329118	0.283938	0.216236	0
Chr11	68050066	68050136	Chr11_68050066_68050136_+	0	+	0.114286	0	0	0
Chr11	68050664	68050740	Chr11_68050664_68050740_+	0	+	0.131108	0	0.158199	0
Chr11	69085286	69085670	Chr11_69085286_69085670_+	0	+	0.127182	0	0	0
Chr11	72095096	72095378	Chr11_72095096_72095378_+	0	+	0.157895	0	0	0.151515
Chr11	72229752	72229923	Chr11_72229752_72229923_+	0	+	0.21371	0.264244	0.330607	0.324439
Chr11	72233522	72233654	Chr11_72233522_72233654_+	0	+	0.128594	0.190707	0.244015	0.163783
Chr11	72826589	72826702	Chr11_72826589_72826702_+	0	+	0.105263	0.117406	0	0.221512
Chr11	72828508	72828728	Chr11_72828508_72828728_+	0	+	0.13716	0	0	0
Chr11	72843328	72843448	Chr11_72843328_72843448_-	0	-	0.124378	0.15625	0	0
Chr11	73353012	73355532	Chr11_73353012_73355532_+	0	+	0.238474	0.178022	0	0
Chr11	73356351	73356708	Chr11_73356351_73356708_+	0	+	0.3	0	0.139011	0
Chr11	73362734	73363205	Chr11_73362734_73363205_+	0	+	0.179601	0	0.186273	0
Chr11	73391223	73392210	Chr11_73391223_73392210_+	0	+	0.14241	0	0	0
Chr11	74625573	74629216	Chr11_74625573_74629216_+	0	+	0.124259	0	0	0.161426
Chr11	76191856	76194566	Chr11_76191856_76194566_-	0	-	0.111561	0	0	0
Chr11	76544822	76545796	Chr11_76544822_76545796_+	0	+	0.196197	0	0.107569	0
Chr11	77590611	77603555	Chr11_77590611_77603555_+	0	+	0.125943	0	0	0
Chr11	78220444	78221676	Chr11_78220444_78221676_-	0	-	0.203827	0	0.190083	0
Chr11	78221779	78222104	Chr11_78221779_78222104_-	0	-	0.167423	0	0	0
Chr11	85635778	85636045	Chr11_85635778_85636045_+	0	+	0.132185	0	0.136167	0
Chr11	86277138	86277917	Chr11_86277138_86277917_+	0	+	0.123603	0	0	0
Chr11	86950499	86951215	Chr11_86950499_86951215_+	0	+	0.534099	0	0	0.551976
Chr11	92889248	92889855	Chr11_92889248_92889855_+	0	+	0.136838	0	0	0
Chr11	93683742	93683963	Chr11_93683742_93683963_+	0	+	0.125	0	0	0
Chr11	93736304	93736693	Chr11_93736304_93736693_-	0	-	0.10365	0	0	0
Chr11	93793864	93793950	Chr11_93793864_93793950_+	0	+	0.107879	0	0	0
Chr11	95778957	95779606	Chr11_95778957_95779606_-	0	-	0.114999	0	0	0
Chr11	95821978	95822498	Chr11_95821978_95822498_+	0	+	0.19379	0	0.148178	0
Chr11	103154606	103154694	Chr11_103154606_103154694_+	0	+	0.2	0	0	0.2922
Chr11	112150206	112153591	Chr11_112150206_112153591_-	0	-	0.10041	0	0	0
Chr11	112230230	112230625	Chr11_112230230_112230625_+	0	+	0.160989	0	0	0
Chr11	116876009	116876252	Chr11_116876009_116876252_-	0	-	0.102079	0	0	0
Chr11	117183878	117184073	Chr11_117183878_117184073_+	0	+	0.1	0	0	0
Chr11	117209053	117218465	Chr11_117209053_117218465_-	0	-	0.168179	0	0	0
Chr11	117290659	117290899	Chr11_117290659_117290899_-	0	-	0.352632	0	0.163672	0.10503
Chr11	117291049	117291711	Chr11_117291049_117291711_-	0	-	0.304525	0	0	0
Chr11	119026688	119026936	Chr11_119026688_119026936_-	0	-	0.120675	0	0	0
Chr11	119027872	119028193	Chr11_119027872_119028193_-	0	-	0.14279	0.154367	0	0
Chr11	119028426	119029221	Chr11_119028426_119029221_-	0	-	0.104273	0	0	0
Chr11	119029564	119030231	Chr11_119029564_119030231_-	0	-	0.628766	0	0	0
Chr11	119078704	119078794	Chr11_119078704_119078794_+	0	+	0.176471	0	0.125	0
Chr11	119091526	119092124	Chr11_119091526_119092124_+	0	+	0.10459	0	0	0
Chr11	119092163	119092403	Chr11_119092163_119092403_+	0	+	0.144754	0.246425	0	0.111411
Chr11	119097063	119097141	Chr11_119097063_119097141_-	0	-	0.122715	0.243913	0.166667	0
Chr11	119097297	119097463	Chr11_119097297_119097463_-	0	-	0.114471	0.138208	0	0
Chr11	119112392	119112481	Chr11_119112392_119112481_+	0	+	0.135371	0	0	0
Chr11	119112874	119113610	Chr11_119112874_119113610_+	0	+	0.105209	0	0	0
Chr11	119114365	119116044	Chr11_119114365_119116044_+	0	+	0.139323	0.105984	0	0.206223
Chr11	119182345	119183117	Chr11_119182345_119183117_+	0	+	0.263742	0	0	0
Chr11	120330049	120330406	Chr11_120330049_120330406_+	0	+	0.681088	0.702845	0.753035	0.765542
Chr11	123729214	123729614	Chr11_123729214_123729614_-	0	-	0.232367	0.195086	0.104735	0
Chr11	123740232	123740416	Chr11_123740232_123740416_-	0	-	0.173047	0	0	0.415774
Chr11	124630485	124630744	Chr11_124630485_124630744_+	0	+	0.1	0	0	0
Chr11	126269291	126271436	Chr11_126269291_126271436_+	0	+	0.33084	0	0	0
Chr11	126275021	126275326	Chr11_126275021_126275326_+	0	+	0.267129	0.180057	0	0.102617
Chr11	129883206	129884069	Chr11_129883206_129884069_-	0	-	0.102004	0	0	0
Chr11	134252916	134253226	Chr11_134252916_134253226_-	0	-	0.383474	0	0	0.38756
Chr11	134256648	134257087	Chr11_134256648_134257087_+	0	+	0.34942	0.425794	0.101723	0
Chr12	546713	548023	Chr12_546713_548023_+	0	+	0.202148	0	0	0
Chr12	6560326	6560446	Chr12_6560326_6560446_-	0	-	0.257036	0.3173	0	0.212672
Chr12	6833644	6833741	Chr12_6833644_6833741_+	0	+	0.276054	0.246799	0	0
Chr12	6849429	6849564	Chr12_6849429_6849564_-	0	-	0.101594	0	0	0
Chr12	6977525	6977597	Chr12_6977525_6977597_-	0	-	0.139706	0.109354	0	0
Chr12	6978507	6978602	Chr12_6978507_6978602_-	0	-	0.223115	0.260668	0.201389	0.131537
Chr12	7102087	7108250	Chr12_7102087_7108250_-	0	-	0.170159	0	0	0
Chr12	8091850	8092675	Chr12_8091850_8092675_+	0	+	0.129161	0	0	0
Chr12	8933350	8933864	Chr12_8933350_8933864_+	0	+	0.323283	0.159807	0	0
Chr12	19518113	19518674	Chr12_19518113_19518674_+	0	+	0.72232	0.648726	0	0.712227
Chr12	21467618	21468505	Chr12_21467618_21468505_+	0	+	0.277613	0	0	0
Chr12	30630957	30631894	Chr12_30630957_30631894_-	0	-	0.146092	0.116094	0	0.187153
Chr12	31100707	31101026	Chr12_31100707_31101026_+	0	+	0.243816	0.278003	0.178551	0.206691
Chr12	31103731	31103806	Chr12_31103731_31103806_+	0	+	0.322913	0.332771	0.248032	0.223401
Chr12	31985957	31987238	Chr12_31985957_31987238_+	0	+	0.299318	0	0	0
Chr12	32740240	32740408	Chr12_32740240_32740408_+	0	+	0.112295	0	0	0
Chr12	47795380	47795586	Chr12_47795380_47795586_-	0	-	0.119086	0	0	0
Chr12	48135038	48135290	Chr12_48135038_48135290_+	0	+	0.115237	0	0	0
Chr12	48344712	48345344	Chr12_48344712_48345344_-	0	-	0.101124	0	0	0
Chr12	48771973	48772294	Chr12_48771973_48772294_-	0	-	0.110693	0	0	0
Chr12	49100454	49100555	Chr12_49100454_49100555_-	0	-	0.137569	0.196166	0	0.112676
Chr12	49102196	49102292	Chr12_49102196_49102292_-	0	-	0.210526	0	0.157116	0.283073
Chr12	49104885	49105923	Chr12_49104885_49105923_-	0	-	0.112308	0	0	0
Chr12	49329991	49330144	Chr12_49329991_49330144_+	0	+	0.349265	0.370474	0.37952	0.280106
Chr12	49330943	49331213	Chr12_49330943_49331213_+	0	+	0.529746	0.465373	0.374493	0.542698
Chr12	49331407	49331572	Chr12_49331407_49331572_+	0	+	0.145833	0	0	0
Chr12	49792051	49792445	Chr12_49792051_49792445_-	0	-	0.31666	0.287211	0	0.226908
Chr12	49801967	49802957	Chr12_49801967_49802957_-	0	-	0.154012	0.133622	0	0
Chr12	50078577	50078923	Chr12_50078577_50078923_+	0	+	0.168889	0	0.103433	0
Chr12	50081181	50081259	Chr12_50081181_50081259_+	0	+	0.104478	0.133929	0.219008	0.146468
Chr12	51056021	51056143	Chr12_51056021_51056143_+	0	+	0.172791	0	0	0.235384
Chr12	51196173	51196798	Chr12_51196173_51196798_-	0	-	0.161132	0	0	0
Chr12	53057679	53057772	Chr12_53057679_53057772_+	0	+	0.333333	0	0	0
Chr12	53058445	53058571	Chr12_53058445_53058571_+	0	+	0.117647	0	0.153846	0
Chr12	53063257	53063348	Chr12_53063257_53063348_+	0	+	0.153846	0	0	0
Chr12	53063592	53063743	Chr12_53063592_53063743_+	0	+	0.256228	0	0	0
Chr12	53289594	53290084	Chr12_53289594_53290084_+	0	+	0.19482	0.115455	0.165667	0
Chr12	53290212	53290346	Chr12_53290212_53290346_+	0	+	0.158426	0.149439	0.26737	0.15617
Chr12	53483486	53483606	Chr12_53483486_53483606_-	0	-	0.197917	0	0	0
Chr12	53483723	53483910	Chr12_53483723_53483910_-	0	-	0.128834	0	0	0.334375
Chr12	53484365	53485055	Chr12_53484365_53485055_-	0	-	0.294321	0	0	0.594876
Chr12	53485214	53485316	Chr12_53485214_53485316_-	0	-	0.285714	0	0	0
Chr12	55688957	55692843	Chr12_55688957_55692843_-	0	-	0.120284	0	0	0
Chr12	55694330	55694442	Chr12_55694330_55694442_-	0	-	0.1	0	0	0
Chr12	55938989	55939185	Chr12_55938989_55939185_+	0	+	0.153846	0.139947	0.129439	0
Chr12	55939529	55940081	Chr12_55939529_55940081_+	0	+	0.300161	0	0	0
Chr12	55952099	55952340	Chr12_55952099_55952340_+	0	+	0.119318	0	0	0
Chr12	56269251	56269459	Chr12_56269251_56269459_+	0	+	0.223226	0.175338	0	0.293494
Chr12	56319181	56319307	Chr12_56319181_56319307_-	0	-	0.569177	0.445339	0.505592	0.590826
Chr12	56326409	56326616	Chr12_56326409_56326616_-	0	-	0.126353	0.243672	0	0.22447
Chr12	56348623	56348751	Chr12_56348623_56348751_-	0	-	0.187147	0	0.157447	0.228677
Chr12	56349059	56349162	Chr12_56349059_56349162_-	0	-	0.467577	0.220269	0.285714	0.366762
Chr12	56349509	56349588	Chr12_56349509_56349588_-	0	-	0.166526	0.387324	0.24856	0.386707
Chr12	56350190	56350411	Chr12_56350190_56350411_-	0	-	0.301891	0.35994	0	0.387571
Chr12	56421134	56421350	Chr12_56421134_56421350_-	0	-	0.220606	0.337761	0.197518	0.258456
Chr12	56428405	56428548	Chr12_56428405_56428548_-	0	-	0.110331	0.118798	0.116983	0
Chr12	56471836	56472118	Chr12_56471836_56472118_-	0	-	0.139953	0	0	0
Chr12	56589018	56589139	Chr12_56589018_56589139_+	0	+	0.1	0	0	0
Chr12	56604799	56605072	Chr12_56604799_56605072_-	0	-	0.245889	0.215606	0.137649	0
Chr12	57517180	57517268	Chr12_57517180_57517268_-	0	-	0.24223	0	0.229385	0.221884
Chr12	57582629	57583100	Chr12_57582629_57583100_+	0	+	0.191498	0	0	0
Chr12	57613760	57614015	Chr12_57613760_57614015_+	0	+	0.108108	0	0	0
Chr12	57624982	57625122	Chr12_57624982_57625122_+	0	+	0.595106	0.244084	0.464952	0
Chr12	57625156	57625235	Chr12_57625156_57625235_+	0	+	0.740608	0.417736	0	0.639303
Chr12	57625318	57625409	Chr12_57625318_57625409_+	0	+	0.579032	0.380219	0.349903	0.421446
Chr12	57625464	57625581	Chr12_57625464_57625581_+	0	+	0.740964	0.803308	0	0
Chr12	57764550	57764753	Chr12_57764550_57764753_-	0	-	0.254717	0.363929	0	0.165493
Chr12	68835984	68836671	Chr12_68835984_68836671_+	0	+	0.143435	0	0	0
Chr12	71610565	71610694	Chr12_71610565_71610694_-	0	-	0.268274	0.245484	0.15169	0.308025
Chr12	71610757	71611057	Chr12_71610757_71611057_-	0	-	0.116931	0	0	0
Chr12	71611097	71611785	Chr12_71611097_71611785_-	0	-	0.248166	0.155648	0	0
Chr12	76828490	76841981	Chr12_76828490_76841981_+	0	+	0.1013	0	0	0
Chr12	76845802	76846595	Chr12_76845802_76846595_+	0	+	0.184391	0	0	0
Chr12	88053746	88054339	Chr12_88053746_88054339_-	0	-	0.180587	0	0	0
Chr12	95057878	95058309	Chr12_95057878_95058309_-	0	-	0.353287	0.344538	0	0.421173
Chr12	100167443	100167549	Chr12_100167443_100167549_-	0	-	0.147541	0	0	0
Chr12	103983218	103983294	Chr12_103983218_103983294_+	0	+	0.173913	0	0	0
Chr12	103996847	103997450	Chr12_103996847_103997450_-	0	-	0.122057	0	0	0.177516
Chr12	109264386	109265109	Chr12_109264386_109265109_+	0	+	0.207669	0	0	0.101338
Chr12	109907699	109908585	Chr12_109907699_109908585_+	0	+	0.121099	0	0	0
Chr12	109908698	109908870	Chr12_109908698_109908870_+	0	+	0.166667	0.110683	0	0
Chr12	110027766	110028511	Chr12_110027766_110028511_+	0	+	0.289499	0	0	0
Chr12	111931827	111932585	Chr12_111931827_111932585_-	0	-	0.104478	0	0	0
Chr12	112167917	112169502	Chr12_112167917_112169502_-	0	-	0.304185	0.271638	0.290602	0
Chr12	113291958	113292933	Chr12_113291958_113292933_+	0	+	0.416583	0	0	0.112254
Chr12	113320498	113320580	Chr12_113320498_113320580_-	0	-	0.206731	0.301423	0	0
Chr12	113320686	113320849	Chr12_113320686_113320849_-	0	-	0.152086	0.550401	0	0.126516
Chr12	113321108	113321195	Chr12_113321108_113321195_-	0	-	0.109515	0	0	0
Chr12	114672302	114674164	Chr12_114672302_114674164_-	0	-	0.13508	0	0	0
Chr12	119710620	119712177	Chr12_119710620_119712177_-	0	-	0.14929	0	0	0
Chr12	120579412	120579513	Chr12_120579412_120579513_-	0	-	0.237224	0	0	0
Chr12	120579597	120579773	Chr12_120579597_120579773_-	0	-	0.305991	0.20094	0.165233	0
Chr12	120738450	120738532	Chr12_120738450_120738532_+	0	+	0.125	0.148332	0	0.269737
Chr12	121232507	121232610	Chr12_121232507_121232610_+	0	+	0.151515	0	0	0.102362
Chr12	121240869	121245139	Chr12_121240869_121245139_-	0	-	0.10578	0	0	0
Chr12	121327231	121328315	Chr12_121327231_121328315_-	0	-	0.130557	0	0	0
Chr12	121781006	121781082	Chr12_121781006_121781082_-	0	-	0.718424	0.776187	0.575714	0
Chr12	122483344	122483459	Chr12_122483344_122483459_-	0	-	0.303387	0.181818	0.206879	0.237641
Chr12	122855405	122855550	Chr12_122855405_122855550_+	0	+	0.2	0.384207	0.231068	0
Chr12	122860077	122860147	Chr12_122860077_122860147_+	0	+	0.29506	0.381924	0.222134	0.278396
Chr12	122976767	122976870	Chr12_122976767_122976870_+	0	+	0.112291	0	0	0
Chr12	122979010	122979082	Chr12_122979010_122979082_+	0	+	0.266314	0.191176	0.302326	0.2156
Chr12	122982538	122982619	Chr12_122982538_122982619_+	0	+	0.191262	0.150183	0.131529	0.170361
Chr12	123605981	123606072	Chr12_123605981_123606072_+	0	+	0.214286	0.172622	0.203681	0
Chr12	123607523	123607599	Chr12_123607523_123607599_+	0	+	0.323671	0.186047	0.225761	0.210208
Chr12	131845449	131849801	Chr12_131845449_131849801_+	0	+	0.320145	0	0	0
Chr12	131920136	131921099	Chr12_131920136_131921099_+	0	+	0.160835	0.132672	0.20683	0
Chr12	132141020	132141274	Chr12_132141020_132141274_-	0	-	0.509694	0.372733	0.239245	0
Chr12	132141956	132142118	Chr12_132141956_132142118_-	0	-	0.265877	0.328911	0.166667	0
Chr12	132142422	132142727	Chr12_132142422_132142727_-	0	-	0.143349	0	0	0
Chr12	132661164	132661526	Chr12_132661164_132661526_-	0	-	0.120894	0	0.125346	0.103195
Chr12	132668737	132668810	Chr12_132668737_132668810_-	0	-	0.236994	0.179633	0.212598	0.144448
Chr12	132847130	132848084	Chr12_132847130_132848084_-	0	-	0.120329	0	0	0
Chr13	24884083	24884160	Chr13_24884083_24884160_-	0	-	0.14587	0	0	0
Chr13	24884245	24884322	Chr13_24884245_24884322_-	0	-	0.286417	0.226516	0	0.394089
Chr13	24884463	24885275	Chr13_24884463_24885275_-	0	-	0.251163	0	0.120611	0
Chr13	24885386	24885605	Chr13_24885386_24885605_-	0	-	0.37764	0	0	0.371534
Chr13	25319350	25320529	Chr13_25319350_25320529_+	0	+	0.121174	0	0	0
Chr13	27071149	27075190	Chr13_27071149_27075190_-	0	-	0.151079	0	0	0
Chr13	27271068	27271483	Chr13_27271068_27271483_+	0	+	0.114077	0	0	0
Chr13	32407338	32407644	Chr13_32407338_32407644_-	0	-	0.1	0	0	0
Chr13	37003007	37004515	Chr13_37003007_37004515_+	0	+	0.122201	0.175713	0	0
Chr13	39038723	39039135	Chr13_39038723_39039135_+	0	+	0.180878	0	0	0
Chr13	41372311	41372731	Chr13_41372311_41372731_+	0	+	0.173614	0	0	0.10358
Chr13	45516263	45518761	Chr13_45516263_45518761_+	0	+	0.109806	0	0	0
Chr13	49480335	49480946	Chr13_49480335_49480946_+	0	+	0.137325	0	0	0
Chr13	49997763	50011934	Chr13_49997763_50011934_+	0	+	0.100963	0	0	0
Chr13	51768296	51769155	Chr13_51768296_51769155_-	0	-	0.156358	0	0	0
Chr13	79320710	79322348	Chr13_79320710_79322348_-	0	-	0.163067	0	0	0
Chr13	94574852	94576313	Chr13_94574852_94576313_-	0	-	0.126863	0	0	0
Chr13	102769541	102770011	Chr13_102769541_102770011_-	0	-	0.119758	0	0	0
Chr13	102816554	102821036	Chr13_102816554_102821036_+	0	+	0.153209	0.121544	0	0
Chr13	102865911	102866261	Chr13_102865911_102866261_+	0	+	0.100891	0	0.166667	0
Chr13	110634595	110634671	Chr13_110634595_110634671_+	0	+	0.44664	0	0.350765	0.43264
Chr13	110635588	110637128	Chr13_110635588_110637128_+	0	+	0.283372	0	0.151414	0
Chr13	110894202	110894284	Chr13_110894202_110894284_-	0	-	0.844761	0	0	0
Chr13	113180042	113180157	Chr13_113180042_113180157_-	0	-	0.267996	0	0	0
Chr13	113325846	113325918	Chr13_113325846_113325918_-	0	-	0.1875	0	0.317585	0.163539
Chr13	113363910	113364019	Chr13_113363910_113364019_-	0	-	0.129973	0	0	0
Chr13	114242280	114243256	Chr13_114242280_114243256_+	0	+	0.107003	0	0	0.140299
Chr13	114272481	114272563	Chr13_114272481_114272563_+	0	+	0.628319	0.585308	0.607393	0
Chr13	114286400	114286518	Chr13_114286400_114286518_+	0	+	0.149542	0	0	0.15039
Chr14	20357149	20357395	Chr14_20357149_20357395_+	0	+	0.107462	0.13308	0.177926	0.146016
Chr14	20447690	20447903	Chr14_20447690_20447903_-	0	-	0.153942	0	0.130686	0
Chr14	20449013	20449170	Chr14_20449013_20449170_-	0	-	0.35376	0.442215	0.115536	0.167439
Chr14	20474948	20475061	Chr14_20474948_20475061_+	0	+	0.118223	0	0	0
Chr14	20995951	20996208	Chr14_20995951_20996208_+	0	+	0.149878	0	0.162118	0.153457
Chr14	20996711	20996784	Chr14_20996711_20996784_+	0	+	0.558305	0.475455	0.552823	0.436573
Chr14	21085866	21087000	Chr14_21085866_21087000_+	0	+	0.142857	0	0	0
Chr14	21088876	21089013	Chr14_21088876_21089013_+	0	+	0.130682	0	0.100962	0
Chr14	21499137	21499305	Chr14_21499137_21499305_-	0	-	0.586702	0.536211	0.473418	0.521505
Chr14	21499371	21499491	Chr14_21499371_21499491_-	0	-	0.428455	0.542243	0.469659	0.500843
Chr14	21499802	21500494	Chr14_21499802_21500494_-	0	-	0.120966	0	0	0
Chr14	22770278	22770460	Chr14_22770278_22770460_+	0	+	0.148317	0.159715	0.242851	0.157722
Chr14	22996268	22998426	Chr14_22996268_22998426_-	0	-	0.103067	0	0	0
Chr14	23047374	23047460	Chr14_23047374_23047460_-	0	-	0.195322	0.16131	0	0.10757
Chr14	23048479	23049026	Chr14_23048479_23049026_-	0	-	0.243053	0	0.330566	0
Chr14	23324289	23325246	Chr14_23324289_23325246_+	0	+	0.136335	0.226714	0	0.118954
Chr14	23347996	23348160	Chr14_23347996_23348160_-	0	-	0.209895	0	0	0
Chr14	23348306	23348505	Chr14_23348306_23348505_-	0	-	0.142327	0.30557	0	0
Chr14	23348671	23349271	Chr14_23348671_23349271_-	0	-	0.596581	0.34626	0	0
Chr14	23562066	23562287	Chr14_23562066_23562287_-	0	-	0.401221	0.302089	0.36867	0
Chr14	23562593	23563379	Chr14_23562593_23563379_-	0	-	0.443984	0.189532	0.249425	0
Chr14	23563502	23563583	Chr14_23563502_23563583_-	0	-	0.420341	0.157013	0.388235	0.402062
Chr14	23565701	23565815	Chr14_23565701_23565815_-	0	-	0.188727	0.16442	0.230435	0.230079
Chr14	23565892	23566063	Chr14_23565892_23566063_-	0	-	0.742638	0.59811	0.56385	0.514692
Chr14	24150448	24150597	Chr14_24150448_24150597_+	0	+	0.107702	0.103511	0.267574	0
Chr14	24150888	24151130	Chr14_24150888_24151130_+	0	+	0.200927	0	0.189655	0
Chr14	24158011	24158141	Chr14_24158011_24158141_+	0	+	0.173164	0	0.103448	0
Chr14	24164955	24165846	Chr14_24164955_24165846_+	0	+	0.147005	0	0	0
Chr14	24238405	24238588	Chr14_24238405_24238588_+	0	+	0.140313	0	0	0.152859
Chr14	24240155	24240262	Chr14_24240155_24240262_-	0	-	0.716981	0.85	0.724116	0.837015
Chr14	24240330	24240418	Chr14_24240330_24240418_-	0	-	0.687703	0.780715	0.764994	0.716312
Chr14	24266517	24266775	Chr14_24266517_24266775_-	0	-	0.155147	0	0	0
Chr14	24268198	24268368	Chr14_24268198_24268368_-	0	-	0.259005	0.25065	0	0.247612
Chr14	24268420	24268513	Chr14_24268420_24268513_-	0	-	0.135091	0	0.209986	0.199731
Chr14	24292784	24296508	Chr14_24292784_24296508_-	0	-	0.122663	0	0	0
Chr14	24430931	24431462	Chr14_24430931_24431462_+	0	+	0.142857	0	0	0
Chr14	45204212	45204398	Chr14_45204212_45204398_-	0	-	0.107143	0	0	0
Chr14	45204453	45206082	Chr14_45204453_45206082_-	0	-	0.106931	0	0	0
Chr14	49655843	49663314	Chr14_49655843_49663314_-	0	-	0.123396	0.118519	0	0
Chr14	49779675	49779747	Chr14_49779675_49779747_+	0	+	0.211034	0.362193	0.347751	0.363636
Chr14	49785004	49785091	Chr14_49785004_49785091_-	0	-	0.162848	0	0.125529	0
Chr14	50116179	50116286	Chr14_50116179_50116286_-	0	-	0.115464	0	0	0
Chr14	50628462	50632228	Chr14_50628462_50632228_+	0	+	0.119871	0	0	0
Chr14	50743529	50744242	Chr14_50743529_50744242_-	0	-	0.104228	0	0	0
Chr14	59473090	59475868	Chr14_59473090_59475868_-	0	-	0.369009	0	0	0
Chr14	67569216	67569920	Chr14_67569216_67569920_+	0	+	0.287408	0.18262	0	0
Chr14	67575472	67575822	Chr14_67575472_67575822_+	0	+	0.354338	0	0	0.186899
Chr14	67748639	67751051	Chr14_67748639_67751051_-	0	-	0.125679	0	0	0
Chr14	73111155	73111527	Chr14_73111155_73111527_+	0	+	0.162216	0.149297	0	0
Chr14	73266628	73266722	Chr14_73266628_73266722_+	0	+	0.2	0.361169	0.491369	0.165303
Chr14	73266831	73268556	Chr14_73266831_73268556_+	0	+	0.648053	0	0	0
Chr14	73959078	73959161	Chr14_73959078_73959161_+	0	+	0.168685	0	0	0.109091
Chr14	73961570	73961736	Chr14_73961570_73961736_+	0	+	0.130435	0	0	0
Chr14	74064920	74065180	Chr14_74064920_74065180_-	0	-	0.186677	0	0.246231	0
Chr14	74287886	74288206	Chr14_74287886_74288206_-	0	-	0.170304	0.176763	0	0.131986
Chr14	75105996	75106501	Chr14_75105996_75106501_-	0	-	0.180602	0	0	0
Chr14	76082367	76082616	Chr14_76082367_76082616_+	0	+	0.1609	0.163697	0	0
Chr14	76083289	76083457	Chr14_76083289_76083457_+	0	+	0.291448	0.198477	0	0
Chr14	90278461	90279061	Chr14_90278461_90279061_-	0	-	0.227611	0	0	0.127864
Chr14	90279133	90286353	Chr14_90279133_90286353_-	0	-	0.100287	0	0	0
Chr14	90286492	90288216	Chr14_90286492_90288216_-	0	-	0.102094	0	0	0
Chr14	92685150	92687925	Chr14_92685150_92687925_+	0	+	0.120924	0	0	0
Chr14	93184713	93184809	Chr14_93184713_93184809_-	0	-	0.333333	0	0	0
Chr14	99515335	99516187	Chr14_99515335_99516187_-	0	-	0.103618	0	0	0
Chr14	103699017	103699132	Chr14_103699017_103699132_-	0	-	0.256331	0.236756	0.196142	0.231782
Chr14	103737860	103738678	Chr14_103737860_103738678_-	0	-	0.124449	0	0	0
Chr14	103742823	103746372	Chr14_103742823_103746372_-	0	-	0.128785	0	0	0
Chr14	104756760	104759427	Chr14_104756760_104759427_+	0	+	0.1032	0	0	0
Chr14	105150911	105150990	Chr14_105150911_105150990_-	0	-	0.156364	0	0	0
Chr14	105249085	105249156	Chr14_105249085_105249156_+	0	+	0.166667	0.432468	0.205779	0.245038
Chr14	105384987	105389960	Chr14_105384987_105389960_+	0	+	0.140705	0	0	0
Chr14	105450184	105450260	Chr14_105450184_105450260_+	0	+	0.150937	0.149558	0.223705	0.192184
Chr14	105466742	105469466	Chr14_105466742_105469466_+	0	+	0.402763	0.327236	0	0.258604
Chr15	23005610	23006051	Chr15_23005610_23006051_-	0	-	0.14582	0.232971	0.130396	0.141705
Chr15	30922354	30925126	Chr15_30922354_30925126_+	0	+	0.124257	0	0	0
Chr15	34145491	34146760	Chr15_34145491_34146760_-	0	-	0.119089	0	0	0
Chr15	34147289	34147379	Chr15_34147289_34147379_-	0	-	0.114007	0	0	0
Chr15	40325488	40326394	Chr15_40325488_40326394_+	0	+	0.869872	0	0	0.882149
Chr15	40414982	40415400	Chr15_40414982_40415400_+	0	+	0.185238	0	0	0
Chr15	40814070	40814147	Chr15_40814070_40814147_+	0	+	0.18429	0.158442	0.18449	0.28878
Chr15	41836940	41837067	Chr15_41836940_41837067_+	0	+	0.153846	0	0.154106	0
Chr15	41843811	41844470	Chr15_41843811_41844470_+	0	+	0.11592	0	0	0
Chr15	41845320	41845637	Chr15_41845320_41845637_+	0	+	0.1	0	0	0.108199
Chr15	42725670	42726096	Chr15_42725670_42726096_-	0	-	0.141982	0	0	0
Chr15	42735679	42735874	Chr15_42735679_42735874_-	0	-	0.239008	0	0	0.169381
Chr15	43407570	43407942	Chr15_43407570_43407942_-	0	-	0.621297	0	0.435241	0.331298
Chr15	43408088	43408896	Chr15_43408088_43408896_-	0	-	0.556573	0	0	0.454786
Chr15	44567592	44569397	Chr15_44567592_44569397_-	0	-	0.10125	0	0	0
Chr15	48741704	48741946	Chr15_48741704_48741946_-	0	-	0.106464	0	0	0
Chr15	51458627	51458708	Chr15_51458627_51458708_-	0	-	0.1	0	0	0
Chr15	51458795	51459597	Chr15_51458795_51459597_-	0	-	0.218646	0	0.142038	0.248642
Chr15	52584944	52587150	Chr15_52584944_52587150_-	0	-	0.113483	0	0	0
Chr15	56427739	56428366	Chr15_56427739_56428366_+	0	+	0.122385	0	0	0
Chr15	63588423	63588701	Chr15_63588423_63588701_+	0	+	0.168805	0	0	0
Chr15	64152742	64153244	Chr15_64152742_64153244_+	0	+	0.210672	0.14552	0	0
Chr15	64153339	64153651	Chr15_64153339_64153651_+	0	+	0.105544	0	0	0
Chr15	64818091	64818256	Chr15_64818091_64818256_-	0	-	0.181818	0	0.22975	0
Chr15	64821088	64821166	Chr15_64821088_64821166_-	0	-	0.279588	0	0.229862	0.418182
Chr15	64821281	64821366	Chr15_64821281_64821366_-	0	-	0.326087	0	0.225691	0
Chr15	66527383	66527856	Chr15_66527383_66527856_+	0	+	0.161886	0	0	0
Chr15	72241985	72242156	Chr15_72241985_72242156_-	0	-	0.103448	0	0	0
Chr15	72756447	72760406	Chr15_72756447_72760406_-	0	-	0.136142	0	0	0
Chr15	74591434	74591559	Chr15_74591434_74591559_+	0	+	0.130577	0.111111	0	0
Chr15	74904712	74905153	Chr15_74904712_74905153_-	0	-	0.227778	0	0	0.149931
Chr15	75044514	75048552	Chr15_75044514_75048552_+	0	+	0.115155	0	0	0
Chr15	75339344	75339701	Chr15_75339344_75339701_+	0	+	0.129011	0.119045	0.101415	0
Chr15	75352230	75352323	Chr15_75352230_75352323_+	0	+	0.262295	0.255119	0.436211	0.160959
Chr15	75353866	75354249	Chr15_75353866_75354249_+	0	+	0.807993	0	0	0.81697
Chr15	75354277	75354430	Chr15_75354277_75354430_+	0	+	0.911278	0	0	0
Chr15	75354492	75354652	Chr15_75354492_75354652_+	0	+	0.358151	0.497968	0	0
Chr15	75356449	75356605	Chr15_75356449_75356605_-	0	-	0.190974	0	0	0
Chr15	75356685	75356792	Chr15_75356685_75356792_-	0	-	0.488418	0.546459	0.419617	0.563987
Chr15	75359425	75359619	Chr15_75359425_75359619_-	0	-	0.531444	0.602952	0.64291	0.451788
Chr15	75359775	75359902	Chr15_75359775_75359902_-	0	-	0.111273	0	0.209677	0
Chr15	75359988	75360089	Chr15_75359988_75360089_-	0	-	0.294052	0.284333	0.238442	0.287809
Chr15	75360211	75360564	Chr15_75360211_75360564_-	0	-	0.322293	0	0.47103	0
Chr15	75367634	75368072	Chr15_75367634_75368072_-	0	-	0.104215	0	0	0
Chr15	76341301	76341718	Chr15_76341301_76341718_+	0	+	0.152972	0	0	0
Chr15	83587086	83588661	Chr15_83587086_83588661_+	0	+	0.122141	0	0	0
Chr15	84647954	84648536	Chr15_84647954_84648536_-	0	-	0.220136	0.124762	0	0.12335
Chr15	89628786	89628975	Chr15_89628786_89628975_-	0	-	0.315959	0.148394	0.170322	0
Chr15	89629573	89630286	Chr15_89629573_89630286_-	0	-	0.3331	0.2234	0.375338	0.299385
Chr15	89631710	89632819	Chr15_89631710_89632819_-	0	-	0.142478	0	0	0.121009
Chr15	89632996	89633140	Chr15_89632996_89633140_-	0	-	0.142857	0	0	0
Chr15	90265876	90266287	Chr15_90265876_90266287_+	0	+	0.957158	0.883518	0.933818	0.911607
Chr15	90913406	90913613	Chr15_90913406_90913613_+	0	+	0.193878	0	0	0
Chr15	90932110	90932428	Chr15_90932110_90932428_-	0	-	0.220833	0.185112	0.178237	0.276947
Chr15	90942605	90942911	Chr15_90942605_90942911_+	0	+	0.114794	0	0	0
Chr15	90949720	90950153	Chr15_90949720_90950153_+	0	+	0.117456	0	0	0
Chr15	90960498	90961024	Chr15_90960498_90961024_+	0	+	0.102362	0	0	0.128951
Chr15	90961054	90961617	Chr15_90961054_90961617_+	0	+	0.436504	0.387883	0.421242	0.470015
Chr15	100908482	100914700	Chr15_100908482_100914700_+	0	+	0.101909	0	0	0
Chr16	59127	59248	Chr16_59127_59248_-	0	-	0.216772	0	0	0.202868
Chr16	59349	59418	Chr16_59349_59418_-	0	-	0.182764	0	0.121406	0.155773
Chr16	60539	61119	Chr16_60539_61119_-	0	-	0.641227	0	0.440902	0.459191
Chr16	61281	61384	Chr16_61281_61384_-	0	-	0.133333	0	0	0
Chr16	286473	286553	Chr16_286473_286553_+	0	+	0.181818	0	0.211268	0
Chr16	496859	503003	Chr16_496859_503003_+	0	+	0.122204	0	0.110259	0
Chr16	625509	625898	Chr16_625509_625898_+	0	+	0.121867	0	0	0
Chr16	647544	647782	Chr16_647544_647782_+	0	+	0.194852	0.206726	0.130647	0
Chr16	656871	657090	Chr16_656871_657090_+	0	+	0.131848	0	0.142347	0
Chr16	661172	661341	Chr16_661172_661341_+	0	+	0.11882	0.119655	0.148246	0
Chr16	661501	661596	Chr16_661501_661596_+	0	+	0.17122	0	0.250953	0
Chr16	662331	662672	Chr16_662331_662672_+	0	+	0.371958	0.445936	0	0.581761
Chr16	666598	666672	Chr16_666598_666672_+	0	+	0.18239	0.242898	0.19271	0.168675
Chr16	668569	668655	Chr16_668569_668655_+	0	+	0.13594	0.127556	0.14674	0.165588
Chr16	671000	671082	Chr16_671000_671082_+	0	+	0.351632	0.566482	0.388434	0.365849
Chr16	672384	672488	Chr16_672384_672488_+	0	+	0.149376	0.156193	0.164803	0
Chr16	672566	672702	Chr16_672566_672702_+	0	+	0.143307	0.195561	0.222094	0.1582
Chr16	681880	682019	Chr16_681880_682019_+	0	+	0.469607	0.380552	0.333605	0.368874
Chr16	682076	682164	Chr16_682076_682164_+	0	+	0.363119	0.308913	0.317384	0.306208
Chr16	682281	682363	Chr16_682281_682363_+	0	+	0.295101	0.3175	0.280137	0.2942
Chr16	682874	682952	Chr16_682874_682952_-	0	-	0.111521	0.129902	0.148073	0
Chr16	683441	683529	Chr16_683441_683529_-	0	-	0.36031	0.388949	0.374523	0.344643
Chr16	683781	683860	Chr16_683781_683860_-	0	-	0.259437	0.335452	0.236995	0.237048
Chr16	685176	685256	Chr16_685176_685256_-	0	-	0.108935	0	0.21263	0
Chr16	685597	685678	Chr16_685597_685678_-	0	-	0.104247	0	0	0
Chr16	685783	685868	Chr16_685783_685868_-	0	-	0.156845	0	0.134977	0.125486
Chr16	687739	689159	Chr16_687739_689159_-	0	-	0.230127	0	0	0.108025
Chr16	716992	717070	Chr16_716992_717070_+	0	+	0.46561	0.360996	0.347988	0.381747
Chr16	721702	721800	Chr16_721702_721800_+	0	+	0.241379	0.131327	0.146223	0
Chr16	728029	728115	Chr16_728029_728115_+	0	+	0.274227	0	0.372549	0
Chr16	728233	728315	Chr16_728233_728315_+	0	+	0.171779	0.328	0.295499	0
Chr16	728424	728503	Chr16_728424_728503_+	0	+	0.588652	0.573199	0.585122	0.436285
Chr16	728604	728793	Chr16_728604_728793_+	0	+	0.176471	0	0	0
Chr16	731000	731564	Chr16_731000_731564_-	0	-	0.111289	0	0	0
Chr16	786377	786826	Chr16_786377_786826_-	0	-	0.193473	0	0	0
Chr16	790666	791160	Chr16_790666_791160_+	0	+	0.401577	0.531553	0.501244	0.459081
Chr16	791370	791850	Chr16_791370_791850_+	0	+	0.447492	0	0	0.657253
Chr16	791948	792223	Chr16_791948_792223_+	0	+	0.531159	0.573535	0.618025	0.583784
Chr16	1210493	1210582	Chr16_1210493_1210582_+	0	+	0.117647	0	0.144708	0
Chr16	1352159	1352238	Chr16_1352159_1352238_+	0	+	0.307049	0.377024	0.258728	0.339241
Chr16	1362320	1362451	Chr16_1362320_1362451_+	0	+	0.231884	0.264821	0.219203	0
Chr16	1362534	1362610	Chr16_1362534_1362610_+	0	+	0.109434	0.159584	0.197861	0.207345
Chr16	1366395	1367091	Chr16_1366395_1367091_-	0	-	0.202448	0	0	0
Chr16	1507051	1507305	Chr16_1507051_1507305_+	0	+	0.101171	0.116578	0	0
Chr16	1767297	1767563	Chr16_1767297_1767563_+	0	+	0.116719	0	0	0
Chr16	1767918	1768068	Chr16_1767918_1768068_+	0	+	0.103847	0	0.121701	0
Chr16	1770993	1771069	Chr16_1770993_1771069_-	0	-	0.121982	0	0.144838	0
Chr16	1773841	1774259	Chr16_1773841_1774259_+	0	+	0.22022	0.149793	0.164533	0
Chr16	1775132	1775314	Chr16_1775132_1775314_+	0	+	0.423221	0.614972	0.542629	0.525998
Chr16	1775684	1775796	Chr16_1775684_1775796_+	0	+	0.105263	0	0	0
Chr16	1777443	1777746	Chr16_1777443_1777746_-	0	-	0.193292	0	0.401942	0.310166
Chr16	1777872	1777945	Chr16_1777872_1777945_-	0	-	0.227723	0.464272	0.557823	0.567712
Chr16	1778048	1778133	Chr16_1778048_1778133_-	0	-	0.257263	0.476434	0.430741	0.546574
Chr16	1778321	1778434	Chr16_1778321_1778434_-	0	-	0.689943	0.5592	0.567572	0
Chr16	1999121	1999495	Chr16_1999121_1999495_-	0	-	0.142577	0	0	0
Chr16	2091597	2091780	Chr16_2091597_2091780_-	0	-	0.159554	0	0	0
Chr16	2093738	2093810	Chr16_2093738_2093810_-	0	-	0.165929	0	0	0
Chr16	2094210	2097147	Chr16_2094210_2097147_-	0	-	0.124173	0	0	0
Chr16	2106304	2106397	Chr16_2106304_2106397_-	0	-	0.208543	0	0	0
Chr16	2151908	2152819	Chr16_2151908_2152819_+	0	+	0.120125	0	0	0
Chr16	2153222	2153318	Chr16_2153222_2153318_+	0	+	0.12	0	0.225806	0
Chr16	2184868	2184950	Chr16_2184868_2184950_-	0	-	0.311475	0	0	0.125
Chr16	2187274	2187352	Chr16_2187274_2187352_-	0	-	0.1	0.12	0	0
Chr16	2233183	2233437	Chr16_2233183_2233437_+	0	+	0.166053	0	0.234431	0.131391
Chr16	2235143	2235215	Chr16_2235143_2235215_+	0	+	0.11245	0	0	0
Chr16	2460693	2460815	Chr16_2460693_2460815_+	0	+	0.167421	0	0	0
Chr16	2472629	2472700	Chr16_2472629_2472700_+	0	+	0.344023	0.453395	0	0
Chr16	2498396	2499356	Chr16_2498396_2499356_+	0	+	0.139054	0	0	0.215869
Chr16	2499420	2499834	Chr16_2499420_2499834_+	0	+	0.179747	0.258842	0	0
Chr16	2527615	2527772	Chr16_2527615_2527772_+	0	+	0.136364	0	0	0
Chr16	2528559	2528649	Chr16_2528559_2528649_+	0	+	0.642458	0	0	0.477824
Chr16	2966231	2966324	Chr16_2966231_2966324_+	0	+	0.616228	0.592549	0	0
Chr16	2973064	2973137	Chr16_2973064_2973137_-	0	-	0.343783	0.499363	0.310437	0.270993
Chr16	2974157	2974244	Chr16_2974157_2974244_-	0	-	0.123232	0.144645	0.115388	0
Chr16	3021689	3021770	Chr16_3021689_3021770_+	0	+	0.1	0	0	0
Chr16	3026166	3026250	Chr16_3026166_3026250_+	0	+	0.110169	0.142145	0.128329	0
Chr16	3027280	3027365	Chr16_3027280_3027365_+	0	+	0.113208	0.157411	0.16018	0.146889
Chr16	3285754	3286022	Chr16_3285754_3286022_+	0	+	0.298876	0	0	0
Chr16	3657111	3657186	Chr16_3657111_3657186_+	0	+	0.541509	0.531176	0.682353	0
Chr16	3992363	3993405	Chr16_3992363_3993405_-	0	-	0.103759	0	0	0
Chr16	4437485	4441374	Chr16_4437485_4441374_+	0	+	0.221523	0	0	0
Chr16	4697104	4697332	Chr16_4697104_4697332_-	0	-	0.1	0	0	0
Chr16	4698062	4698426	Chr16_4698062_4698426_-	0	-	0.153846	0	0	0
Chr16	4698941	4699051	Chr16_4698941_4699051_-	0	-	0.214403	0	0	0
Chr16	4701543	4702101	Chr16_4701543_4702101_-	0	-	0.107686	0	0	0
Chr16	4724831	4726658	Chr16_4724831_4726658_-	0	-	0.186971	0	0	0
Chr16	5027198	5027277	Chr16_5027198_5027277_-	0	-	0.16	0.202285	0.234868	0.161311
Chr16	5030493	5031744	Chr16_5030493_5031744_-	0	-	0.158119	0	0	0
Chr16	5033728	5033828	Chr16_5033728_5033828_-	0	-	0.524528	0	0.641104	0.624609
Chr16	5090349	5090431	Chr16_5090349_5090431_-	0	-	0.19708	0	0	0
Chr16	8642565	8644556	Chr16_8642565_8644556_+	0	+	0.263568	0.190584	0.113594	0.152384
Chr16	10386122	10387143	Chr16_10386122_10387143_+	0	+	0.160305	0	0	0
Chr16	10743882	10743960	Chr16_10743882_10743960_+	0	+	0.181818	0	0	0
Chr16	11761511	11761909	Chr16_11761511_11761909_-	0	-	0.12767	0	0	0
Chr16	13926756	13928027	Chr16_13926756_13928027_+	0	+	0.154388	0	0	0
Chr16	15128135	15128221	Chr16_15128135_15128221_-	0	-	0.25	0.324376	0.34375	0
Chr16	15600701	15601990	Chr16_15600701_15601990_-	0	-	0.113043	0	0	0
Chr16	15617171	15617298	Chr16_15617171_15617298_-	0	-	0.1	0	0	0
Chr16	15624927	15625015	Chr16_15624927_15625015_-	0	-	0.105263	0	0	0
Chr16	20800038	20800301	Chr16_20800038_20800301_-	0	-	0.259259	0	0	0
Chr16	20803670	20805714	Chr16_20803670_20805714_-	0	-	0.108085	0	0	0
Chr16	20845241	20846220	Chr16_20845241_20846220_+	0	+	0.167778	0	0	0
Chr16	20846339	20849398	Chr16_20846339_20849398_+	0	+	0.103474	0	0	0
Chr16	23494378	23495693	Chr16_23494378_23495693_-	0	-	0.100428	0	0	0
Chr16	24795939	24797489	Chr16_24795939_24797489_+	0	+	0.104434	0	0	0
Chr16	27219110	27220392	Chr16_27219110_27220392_+	0	+	0.10911	0	0	0
Chr16	28905759	28905866	Chr16_28905759_28905866_-	0	-	0.125	0	0	0
Chr16	29697127	29697198	Chr16_29697127_29697198_+	0	+	0.104372	0	0	0
Chr16	30358817	30359171	Chr16_30358817_30359171_-	0	-	0.105263	0	0	0
Chr16	30395873	30397329	Chr16_30395873_30397329_+	0	+	0.101627	0	0	0
Chr16	30408194	30417554	Chr16_30408194_30417554_+	0	+	0.102946	0	0	0
Chr16	30557846	30557986	Chr16_30557846_30557986_-	0	-	0.251309	0.449735	0.594481	0.360787
Chr16	30751603	30753231	Chr16_30751603_30753231_+	0	+	0.317428	0	0	0
Chr16	30756520	30756589	Chr16_30756520_30756589_+	0	+	0.273757	0.308579	0.375233	0.299926
Chr16	30759247	30759341	Chr16_30759247_30759341_-	0	-	0.24758	0	0	0
Chr16	30966386	30966883	Chr16_30966386_30966883_+	0	+	0.101152	0	0	0
Chr16	30980194	30980484	Chr16_30980194_30980484_+	0	+	0.118309	0	0.135819	0
Chr16	30980657	30980738	Chr16_30980657_30980738_+	0	+	0.103753	0.138718	0.141536	0
Chr16	31034325	31034461	Chr16_31034325_31034461_+	0	+	0.15498	0	0.218123	0
Chr16	31039651	31039722	Chr16_31039651_31039722_+	0	+	0.25	0	0	0.132353
Chr16	31493524	31493602	Chr16_31493524_31493602_-	0	-	0.402083	0.307263	0.279607	0.471376
Chr16	46696085	46697457	Chr16_46696085_46697457_+	0	+	0.160525	0	0	0
Chr16	50312191	50312889	Chr16_50312191_50312889_+	0	+	0.172552	0	0	0
Chr16	53318340	53321525	Chr16_53318340_53321525_+	0	+	0.137212	0	0	0.167447
Chr16	53494245	53494338	Chr16_53494245_53494338_-	0	-	0.1	0	0	0
Chr16	53494437	53494516	Chr16_53494437_53494516_-	0	-	0.233058	0.263369	0	0.189327
Chr16	56501497	56502316	Chr16_56501497_56502316_-	0	-	0.102014	0.115839	0.131782	0
Chr16	57205008	57208057	Chr16_57205008_57208057_+	0	+	0.1099	0	0	0
Chr16	57457015	57458245	Chr16_57457015_57458245_+	0	+	0.129724	0.140308	0	0.133566
Chr16	57473495	57473612	Chr16_57473495_57473612_-	0	-	0.24631	0	0.25	0
Chr16	57752055	57752529	Chr16_57752055_57752529_+	0	+	0.126519	0	0	0
Chr16	57758909	57759124	Chr16_57758909_57759124_-	0	-	0.153846	0	0	0
Chr16	58507015	58507807	Chr16_58507015_58507807_+	0	+	0.178264	0	0.310799	0
Chr16	58509352	58511421	Chr16_58509352_58511421_+	0	+	0.138668	0	0.122271	0
Chr16	66732474	66734217	Chr16_66732474_66734217_-	0	-	0.18313	0.1776	0	0.2864
Chr16	66966345	66966724	Chr16_66966345_66966724_+	0	+	0.323167	0	0	0
Chr16	67179958	67180040	Chr16_67179958_67180040_-	0	-	0.133333	0	0	0
Chr16	67229718	67229792	Chr16_67229718_67229792_-	0	-	0.153846	0	0.197183	0
Chr16	67238307	67238379	Chr16_67238307_67238379_-	0	-	0.183471	0.265018	0	0.108696
Chr16	67281005	67281090	Chr16_67281005_67281090_+	0	+	0.125	0.209184	0	0
Chr16	67286666	67286748	Chr16_67286666_67286748_+	0	+	0.4	0	0.446154	0
Chr16	67659079	67659228	Chr16_67659079_67659228_-	0	-	0.145054	0.160687	0.176826	0.231493
Chr16	67659263	67659374	Chr16_67659263_67659374_-	0	-	0.197018	0.126646	0.125569	0.12379
Chr16	67659419	67659536	Chr16_67659419_67659536_-	0	-	0.148362	0.20537	0.100931	0
Chr16	67664062	67664995	Chr16_67664062_67664995_-	0	-	0.108639	0	0	0
Chr16	67666265	67666357	Chr16_67666265_67666357_-	0	-	0.1	0	0	0
Chr16	67730046	67731471	Chr16_67730046_67731471_-	0	-	0.283169	0	0	0.192931
Chr16	67830088	67830389	Chr16_67830088_67830389_-	0	-	0.763158	0	0.596301	0.671727
Chr16	67877845	67878165	Chr16_67877845_67878165_+	0	+	0.105263	0	0	0
Chr16	67880216	67880556	Chr16_67880216_67880556_+	0	+	0.189863	0	0	0.137568
Chr16	67881845	67881953	Chr16_67881845_67881953_+	0	+	0.240856	0.21521	0.393607	0.310055
Chr16	67935478	67935581	Chr16_67935478_67935581_-	0	-	0.175476	0.196741	0.235991	0
Chr16	67945871	67945950	Chr16_67945871_67945950_-	0	-	0.109063	0	0.1	0
Chr16	67947105	67947330	Chr16_67947105_67947330_-	0	-	0.119595	0	0	0
Chr16	67951060	67951139	Chr16_67951060_67951139_-	0	-	0.117391	0	0	0
Chr16	68023351	68025414	Chr16_68023351_68025414_+	0	+	0.103299	0	0	0
Chr16	68231027	68231177	Chr16_68231027_68231177_-	0	-	0.105263	0	0	0
Chr16	68231376	68231481	Chr16_68231376_68231481_-	0	-	0.1	0	0	0
Chr16	68232288	68232370	Chr16_68232288_68232370_-	0	-	0.204545	0	0	0
Chr16	68290540	68291208	Chr16_68290540_68291208_+	0	+	0.112364	0.184598	0.164726	0.139056
Chr16	68352409	68353491	Chr16_68352409_68353491_+	0	+	0.17707	0	0.1568	0
Chr16	68353566	68355722	Chr16_68353566_68355722_+	0	+	0.116111	0	0.119075	0.113256
Chr16	70329469	70329830	Chr16_70329469_70329830_+	0	+	0.121135	0	0	0
Chr16	70478650	70479179	Chr16_70478650_70479179_+	0	+	0.181133	0	0	0
Chr16	71864242	71864902	Chr16_71864242_71864902_-	0	-	0.113583	0	0	0
Chr16	72021311	72022361	Chr16_72021311_72022361_+	0	+	0.191186	0	0.110453	0.168256
Chr16	72023633	72024144	Chr16_72023633_72024144_+	0	+	0.106099	0	0	0
Chr16	74909917	74912197	Chr16_74909917_74912197_-	0	-	0.217166	0	0	0
Chr16	75600348	75603084	Chr16_75600348_75603084_-	0	-	0.146884	0	0.149279	0
Chr16	84130431	84131101	Chr16_84130431_84131101_-	0	-	0.101355	0	0	0
Chr16	84180344	84181042	Chr16_84180344_84181042_-	0	-	0.395486	0.308757	0.395672	0.380332
Chr16	84181463	84181591	Chr16_84181463_84181591_-	0	-	0.509847	0.667263	0	0.502752
Chr16	84181863	84181941	Chr16_84181863_84181941_-	0	-	0.537954	0	0	0
Chr16	84183507	84183696	Chr16_84183507_84183696_-	0	-	0.176471	0	0.108567	0
Chr16	85657604	85661145	Chr16_85657604_85661145_+	0	+	0.107389	0	0	0
Chr16	87410335	87411515	Chr16_87410335_87411515_-	0	-	0.175655	0	0.12393	0
Chr16	88720283	88720384	Chr16_88720283_88720384_-	0	-	0.176927	0.122115	0.191496	0.231362
Chr16	88732732	88733277	Chr16_88732732_88733277_-	0	-	0.206642	0	0.261284	0
Chr16	89275191	89279071	Chr16_89275191_89279071_-	0	-	0.122656	0	0	0
Chr16	89595603	89596483	Chr16_89595603_89596483_+	0	+	0.21367	0	0.148392	0.141309
Chr16	89693326	89693397	Chr16_89693326_89693397_+	0	+	0.658203	0.744059	0	0.625407
Chr16	89694788	89694930	Chr16_89694788_89694930_+	0	+	0.198813	0.357983	0.436484	0
Chr16	89711969	89712046	Chr16_89711969_89712046_-	0	-	0.730193	0	0.889654	0
Chr16	89712522	89712604	Chr16_89712522_89712604_-	0	-	0.177215	0.306931	0.32047	0
Chr16	89716624	89716729	Chr16_89716624_89716729_-	0	-	0.876364	0.751406	0.800728	0.648846
Chr16	89722834	89723136	Chr16_89722834_89723136_+	0	+	0.153846	0	0	0
Chr16	89723183	89723259	Chr16_89723183_89723259_+	0	+	0.290141	0	0	0
Chr16	89733412	89733481	Chr16_89733412_89733481_+	0	+	0.363057	0.497933	0.43662	0.522631
Chr16	89737905	89737975	Chr16_89737905_89737975_+	0	+	0.78022	0.687959	0.682259	0.708895
Chr16	89739289	89739477	Chr16_89739289_89739477_-	0	-	0.202917	0	0.27589	0.213334
Chr16	89739553	89739993	Chr16_89739553_89739993_-	0	-	0.228231	0.255082	0.290796	0.16461
Chr16	89904205	89904937	Chr16_89904205_89904937_+	0	+	0.142088	0.230756	0.179763	0
Chr16	89972765	89977638	Chr16_89972765_89977638_+	0	+	0.194279	0	0	0
Chr16	90037848	90040299	Chr16_90037848_90040299_+	0	+	0.274814	0	0	0
Chr17	740600	741300	Chr17_740600_741300_+	0	+	0.113757	0	0	0
Chr17	1735717	1736038	Chr17_1735717_1736038_+	0	+	0.145786	0.144714	0	0
Chr17	2041181	2041480	Chr17_2041181_2041480_+	0	+	0.190711	0.178178	0	0
Chr17	2323345	2323654	Chr17_2323345_2323654_+	0	+	0.766982	0.753328	0.816574	0.900357
Chr17	2362905	2362988	Chr17_2362905_2362988_+	0	+	0.307692	0.317932	0.482759	0.519093
Chr17	2372254	2372342	Chr17_2372254_2372342_+	0	+	0.142857	0.236074	0.25	0
Chr17	2373081	2373330	Chr17_2373081_2373330_+	0	+	0.15231	0.22937	0	0.107295
Chr17	2690777	2691608	Chr17_2690777_2691608_-	0	-	0.127963	0	0.125021	0
Chr17	3658175	3659857	Chr17_3658175_3659857_+	0	+	0.175572	0	0	0
Chr17	4541891	4542463	Chr17_4541891_4542463_-	0	-	0.114676	0	0.101031	0
Chr17	4818106	4818296	Chr17_4818106_4818296_+	0	+	0.156662	0.290501	0	0
Chr17	4818385	4818493	Chr17_4818385_4818493_+	0	+	0.144603	0.144828	0.189737	0
Chr17	4818607	4818773	Chr17_4818607_4818773_+	0	+	0.242424	0	0	0.227364
Chr17	4953109	4953271	Chr17_4953109_4953271_+	0	+	0.181818	0	0	0
Chr17	4956681	4956830	Chr17_4956681_4956830_+	0	+	0.110919	0	0	0
Chr17	5106533	5108925	Chr17_5106533_5108925_-	0	-	0.297048	0	0	0
Chr17	7038889	7039762	Chr17_7038889_7039762_+	0	+	0.143351	0	0	0
Chr17	7220046	7220121	Chr17_7220046_7220121_+	0	+	0.219306	0.266135	0.34466	0
Chr17	7220529	7220603	Chr17_7220529_7220603_+	0	+	0.180385	0.191578	0.288557	0.299035
Chr17	7222081	7222176	Chr17_7222081_7222176_+	0	+	0.548499	0.470693	0.587242	0.529067
Chr17	7222865	7223132	Chr17_7222865_7223132_+	0	+	0.642857	0.547246	0.449282	0
Chr17	7313721	7313905	Chr17_7313721_7313905_-	0	-	0.186441	0.135056	0.17654	0.170799
Chr17	7318172	7318268	Chr17_7318172_7318268_-	0	-	0.489575	0.460307	0.451251	0.388646
Chr17	7321787	7321864	Chr17_7321787_7321864_-	0	-	0.129032	0.193811	0.256287	0.175153
Chr17	7323123	7323484	Chr17_7323123_7323484_-	0	-	0.113517	0	0	0
Chr17	7688561	7688647	Chr17_7688561_7688647_+	0	+	0.506934	0.370679	0.30793	0.206897
Chr17	7703127	7703242	Chr17_7703127_7703242_+	0	+	0.143426	0	0	0
Chr17	7853380	7853497	Chr17_7853380_7853497_+	0	+	0.235556	0.150384	0.371993	0.326622
Chr17	7858294	7858402	Chr17_7858294_7858402_+	0	+	0.272727	0	0	0.286385
Chr17	7909338	7910427	Chr17_7909338_7910427_+	0	+	0.296903	0	0.263754	0
Chr17	7944248	7944475	Chr17_7944248_7944475_+	0	+	0.342082	0.294677	0.320423	0
Chr17	7948619	7949084	Chr17_7948619_7949084_+	0	+	0.197531	0	0	0
Chr17	8206888	8207175	Chr17_8206888_8207175_-	0	-	0.262206	0.191992	0.192743	0
Chr17	8229446	8229890	Chr17_8229446_8229890_-	0	-	0.130242	0	0	0
Chr17	8232475	8232905	Chr17_8232475_8232905_-	0	-	0.375465	0	0	0.298831
Chr17	8234926	8235052	Chr17_8234926_8235052_-	0	-	0.181818	0	0	0
Chr17	8289072	8289257	Chr17_8289072_8289257_+	0	+	0.111038	0.136888	0	0
Chr17	16000032	16000117	Chr17_16000032_16000117_+	0	+	0.209028	0	0.16	0.156627
Chr17	17219209	17221536	Chr17_17219209_17221536_-	0	-	0.139935	0	0	0
Chr17	17803849	17809389	Chr17_17803849_17809389_+	0	+	0.226927	0	0	0
Chr17	17817916	17818259	Chr17_17817916_17818259_-	0	-	0.103261	0	0	0
Chr17	19332068	19333955	Chr17_19332068_19333955_+	0	+	0.135579	0	0	0
Chr17	19555909	19555994	Chr17_19555909_19555994_+	0	+	0.285714	0.423077	0	0
Chr17	19675499	19675561	Chr17_19675499_19675561_+	0	+	0.3125	0	0	0
Chr17	28396026	28396156	Chr17_28396026_28396156_+	0	+	0.405405	0.206216	0	0
Chr17	28399713	28400609	Chr17_28399713_28400609_-	0	-	0.191798	0	0	0
Chr17	28577770	28578009	Chr17_28577770_28578009_-	0	-	0.103439	0	0.11419	0
Chr17	28578292	28578372	Chr17_28578292_28578372_-	0	-	0.12685	0.101013	0	0
Chr17	28748423	28748510	Chr17_28748423_28748510_+	0	+	0.140845	0	0	0.100363
Chr17	28902701	28902817	Chr17_28902701_28902817_-	0	-	0.182156	0.322111	0.235416	0.198178
Chr17	29607877	29607985	Chr17_29607877_29607985_+	0	+	0.309154	0	0	0
Chr17	29608110	29608194	Chr17_29608110_29608194_+	0	+	0.328358	0.205426	0	0
Chr17	30900562	30904065	Chr17_30900562_30904065_-	0	-	0.110466	0	0	0
Chr17	31878327	31878701	Chr17_31878327_31878701_-	0	-	0.115279	0	0	0.171846
Chr17	31878781	31880572	Chr17_31878781_31880572_-	0	-	0.121298	0.107691	0	0
Chr17	32338351	32339812	Chr17_32338351_32339812_-	0	-	0.21533	0	0	0
Chr17	32480631	32480752	Chr17_32480631_32480752_+	0	+	0.11313	0.150479	0	0
Chr17	35420381	35421989	Chr17_35420381_35421989_-	0	-	0.144293	0.131197	0	0
Chr17	36499160	36500829	Chr17_36499160_36500829_-	0	-	0.266867	0	0	0
Chr17	36514548	36515112	Chr17_36514548_36515112_-	0	-	0.161055	0	0	0
Chr17	36515182	36515857	Chr17_36515182_36515857_-	0	-	0.193701	0.141886	0	0
Chr17	37538420	37539191	Chr17_37538420_37539191_-	0	-	0.199586	0	0	0.14059
Chr17	39905985	39906110	Chr17_39905985_39906110_-	0	-	0.176471	0	0	0
Chr17	39906271	39906960	Chr17_39906271_39906960_-	0	-	0.4375	0	0	0
Chr17	40095120	40095443	Chr17_40095120_40095443_-	0	-	0.120873	0	0	0
Chr17	40192693	40192925	Chr17_40192693_40192925_+	0	+	0.1	0	0.110169	0
Chr17	41755432	41755729	Chr17_41755432_41755729_-	0	-	0.353305	0.385147	0.477748	0.348935
Chr17	41811284	41811453	Chr17_41811284_41811453_-	0	-	0.186483	0.267736	0.256988	0
Chr17	41821817	41822222	Chr17_41821817_41822222_+	0	+	0.11282	0	0.142634	0
Chr17	42189921	42190184	Chr17_42189921_42190184_-	0	-	0.103448	0	0	0
Chr17	42190270	42190623	Chr17_42190270_42190623_-	0	-	0.551648	0.451076	0.108954	0
Chr17	42190757	42190831	Chr17_42190757_42190831_-	0	-	0.1875	0	0.157407	0.178571
Chr17	42218330	42218722	Chr17_42218330_42218722_-	0	-	0.105073	0	0	0
Chr17	42323354	42323572	Chr17_42323354_42323572_-	0	-	0.139665	0	0	0
Chr17	42563322	42563960	Chr17_42563322_42563960_+	0	+	0.133226	0	0	0
Chr17	42573024	42573106	Chr17_42573024_42573106_-	0	-	0.123711	0	0	0
Chr17	42573364	42573477	Chr17_42573364_42573477_-	0	-	0.101991	0	0	0
Chr17	42574210	42577212	Chr17_42574210_42577212_-	0	-	0.122736	0	0	0.135164
Chr17	42660707	42662972	Chr17_42660707_42662972_+	0	+	0.452828	0	0	0
Chr17	42665562	42665677	Chr17_42665562_42665677_+	0	+	0.573967	0.486348	0.461603	0
Chr17	42670376	42670572	Chr17_42670376_42670572_-	0	-	0.102154	0	0	0
Chr17	42691511	42691805	Chr17_42691511_42691805_+	0	+	0.166667	0	0.119011	0.172581
Chr17	42818877	42819547	Chr17_42818877_42819547_-	0	-	0.112356	0	0	0
Chr17	43814091	43814196	Chr17_43814091_43814196_-	0	-	0.277778	0	0.149653	0
Chr17	43829791	43830026	Chr17_43829791_43830026_-	0	-	0.125	0	0.380426	0
Chr17	43883052	43883202	Chr17_43883052_43883202_-	0	-	0.1	0	0	0
Chr17	44093485	44093574	Chr17_44093485_44093574_-	0	-	0.111111	0	0	0
Chr17	44378509	44378642	Chr17_44378509_44378642_-	0	-	0.158184	0.188568	0.101322	0
Chr17	44772333	44772398	Chr17_44772333_44772398_+	0	+	0.100977	0	0	0.111111
Chr17	44772466	44772856	Chr17_44772466_44772856_+	0	+	0.105298	0	0.218354	0.105263
Chr17	44777863	44777951	Chr17_44777863_44777951_+	0	+	0.136364	0.218368	0	0.230769
Chr17	44936358	44947627	Chr17_44936358_44947627_-	0	-	0.140311	0	0	0
Chr17	45136232	45136499	Chr17_45136232_45136499_+	0	+	0.142857	0.176471	0	0
Chr17	45245416	45245631	Chr17_45245416_45245631_+	0	+	0.2	0.266667	0	0
Chr17	45395633	45395743	Chr17_45395633_45395743_-	0	-	0.166667	0.139271	0	0.102564
Chr17	45396117	45396206	Chr17_45396117_45396206_-	0	-	0.265182	0	0.225	0
Chr17	47808399	47808537	Chr17_47808399_47808537_-	0	-	0.253264	0	0.133333	0
Chr17	47809478	47810593	Chr17_47809478_47810593_-	0	-	0.13776	0	0.128525	0
Chr17	50375983	50376065	Chr17_50375983_50376065_+	0	+	0.125	0	0.309211	0.215582
Chr17	50379567	50380311	Chr17_50379567_50380311_+	0	+	0.350037	0	0.355758	0
Chr17	50480084	50482090	Chr17_50480084_50482090_+	0	+	0.223772	0	0	0
Chr17	50482456	50482642	Chr17_50482456_50482642_+	0	+	0.149697	0.192381	0.222126	0
Chr17	50483760	50484441	Chr17_50483760_50484441_+	0	+	0.291051	0.162203	0	0.22895
Chr17	50550610	50550707	Chr17_50550610_50550707_+	0	+	0.166667	0	0.111328	0
Chr17	50550917	50550997	Chr17_50550917_50550997_+	0	+	0.216783	0	0.243243	0
Chr17	56861918	56862139	Chr17_56861918_56862139_+	0	+	0.303992	0	0	0.192673
Chr17	57866544	57867356	Chr17_57866544_57867356_-	0	-	0.293557	0.269841	0	0
Chr17	58208174	58208512	Chr17_58208174_58208512_-	0	-	0.116245	0	0	0
Chr17	58354986	58357467	Chr17_58354986_58357467_-	0	-	0.239453	0	0.100565	0
Chr17	61404769	61405201	Chr17_61404769_61405201_+	0	+	0.112482	0	0	0
Chr17	62689760	62689893	Chr17_62689760_62689893_+	0	+	0.121321	0	0.139241	0.117647
Chr17	62692138	62692230	Chr17_62692138_62692230_+	0	+	0.103448	0.131915	0.12	0.108803
Chr17	63703751	63704004	Chr17_63703751_63704004_-	0	-	0.619133	0.44116	0.477333	0.418984
Chr17	63798099	63799588	Chr17_63798099_63799588_+	0	+	0.19541	0.158869	0.108605	0.218113
Chr17	63799625	63800467	Chr17_63799625_63800467_+	0	+	0.21852	0.22419	0.135124	0.237505
Chr17	64149091	64150840	Chr17_64149091_64150840_-	0	-	0.112102	0	0	0
Chr17	64525882	64526070	Chr17_64525882_64526070_+	0	+	0.113258	0	0	0.114028
Chr17	64532022	64532838	Chr17_64532022_64532838_+	0	+	0.168757	0	0	0.124141
Chr17	64537112	64537602	Chr17_64537112_64537602_+	0	+	0.131592	0	0	0
Chr17	67993235	67993423	Chr17_67993235_67993423_-	0	-	0.476864	0.578054	0.541401	0.349558
Chr17	68427253	68428828	Chr17_68427253_68428828_-	0	-	0.168605	0	0	0
Chr17	73205680	73206153	Chr17_73205680_73206153_+	0	+	0.189954	0.272643	0	0.157485
Chr17	75131105	75131180	Chr17_75131105_75131180_-	0	-	0.25217	0.227252	0.187602	0.217497
Chr17	75238389	75238651	Chr17_75238389_75238651_-	0	-	0.183253	0.190838	0.178924	0
Chr17	75266967	75267537	Chr17_75266967_75267537_-	0	-	0.121839	0	0	0
Chr17	75492789	75492928	Chr17_75492789_75492928_+	0	+	0.111111	0	0	0
Chr17	75504480	75504571	Chr17_75504480_75504571_-	0	-	0.146552	0	0	0
Chr17	75522333	75523274	Chr17_75522333_75523274_+	0	+	0.539166	0	0	0
Chr17	75570255	75570347	Chr17_75570255_75570347_+	0	+	0.155756	0	0	0
Chr17	75573631	75573951	Chr17_75573631_75573951_+	0	+	0.225691	0	0	0
Chr17	75627692	75628217	Chr17_75627692_75628217_-	0	-	0.104865	0	0	0
Chr17	75630692	75630778	Chr17_75630692_75630778_-	0	-	0.142551	0	0	0
Chr17	75914050	75914121	Chr17_75914050_75914121_-	0	-	0.262537	0.16318	0.145963	0
Chr17	76002142	76002247	Chr17_76002142_76002247_+	0	+	0.181818	0	0	0
Chr17	76002612	76003194	Chr17_76002612_76003194_+	0	+	0.233653	0	0.252762	0.177024
Chr17	76391613	76391755	Chr17_76391613_76391755_-	0	-	0.127596	0	0	0
Chr17	76472839	76473004	Chr17_76472839_76473004_-	0	-	0.186222	0	0	0
Chr17	76474534	76474729	Chr17_76474534_76474729_-	0	-	0.133333	0	0	0
Chr17	76477024	76477179	Chr17_76477024_76477179_-	0	-	0.119403	0	0	0
Chr17	76733215	76733292	Chr17_76733215_76733292_+	0	+	0.15537	0.169231	0	0.118052
Chr17	77088949	77089152	Chr17_77088949_77089152_+	0	+	0.3125	0	0	0.273204
Chr17	78117935	78118970	Chr17_78117935_78118970_-	0	-	0.101344	0	0.203093	0
Chr17	78419675	78424060	Chr17_78419675_78424060_+	0	+	0.385154	0	0	0
Chr17	79796315	79796496	Chr17_79796315_79796496_-	0	-	0.105263	0	0	0
Chr17	79837902	79839010	Chr17_79837902_79839010_-	0	-	0.101335	0	0	0
Chr17	80111025	80111982	Chr17_80111025_80111982_+	0	+	0.121172	0	0.395238	0
Chr17	80212274	80213803	Chr17_80212274_80213803_-	0	-	0.244273	0	0	0
Chr17	80214765	80215032	Chr17_80214765_80215032_-	0	-	0.10363	0	0	0
Chr17	80222847	80223251	Chr17_80222847_80223251_+	0	+	0.105211	0	0	0
Chr17	80249287	80251328	Chr17_80249287_80251328_+	0	+	0.25816	0.159497	0	0
Chr17	80358479	80360060	Chr17_80358479_80360060_+	0	+	0.136802	0	0	0
Chr17	80422245	80423519	Chr17_80422245_80423519_+	0	+	0.142109	0	0	0
Chr17	81231476	81231577	Chr17_81231476_81231577_-	0	-	0.440678	0.499739	0.239303	0.484405
Chr17	81447848	81451667	Chr17_81447848_81451667_+	0	+	0.163485	0	0	0
Chr17	81455390	81456296	Chr17_81455390_81456296_+	0	+	0.168067	0	0	0
Chr17	81510329	81510479	Chr17_81510329_81510479_-	0	-	0.625847	0.911966	0.816835	0
Chr17	81670453	81671743	Chr17_81670453_81671743_+	0	+	0.100924	0	0	0
Chr17	81696747	81696823	Chr17_81696747_81696823_+	0	+	0.126671	0.106266	0.185287	0.110429
Chr17	81914167	81914293	Chr17_81914167_81914293_-	0	-	0.24144	0.149266	0.166316	0
Chr17	81914702	81915439	Chr17_81914702_81915439_-	0	-	0.271772	0	0.173982	0
Chr17	81917719	81917829	Chr17_81917719_81917829_-	0	-	0.182692	0	0.147005	0.218045
Chr17	82016869	82016940	Chr17_82016869_82016940_+	0	+	0.225806	0.350742	0.264706	0.22973
Chr17	82019909	82022825	Chr17_82019909_82022825_-	0	-	0.101935	0	0	0
Chr17	82024339	82024692	Chr17_82024339_82024692_+	0	+	0.142857	0.11753	0	0.109852
Chr17	82028508	82028612	Chr17_82028508_82028612_+	0	+	0.104925	0.115385	0	0.106899
Chr17	82028683	82029092	Chr17_82028683_82029092_+	0	+	0.402037	0.532894	0.515998	0.452884
Chr17	82036448	82036543	Chr17_82036448_82036543_-	0	-	0.192557	0.249586	0.237955	0.228333
Chr17	82036643	82036720	Chr17_82036643_82036720_-	0	-	0.244755	0.263989	0.212951	0.230951
Chr17	82049842	82049917	Chr17_82049842_82049917_-	0	-	0.308958	0.399237	0.299015	0.199625
Chr17	82050006	82050401	Chr17_82050006_82050401_-	0	-	0.417966	0	0.367833	0
Chr17	82050555	82050661	Chr17_82050555_82050661_-	0	-	0.2	0.262942	0.298796	0.331634
Chr17	82193830	82193981	Chr17_82193830_82193981_-	0	-	0.734266	0	0.784743	0.864124
Chr17	82436738	82437167	Chr17_82436738_82437167_+	0	+	0.349773	0.407375	0	0
Chr17	82441075	82441164	Chr17_82441075_82441164_+	0	+	0.54682	0.483333	0.610951	0.521616
Chr17	82445960	82446622	Chr17_82445960_82446622_-	0	-	0.255259	0	0.1131	0
Chr17	82740854	82741310	Chr17_82740854_82741310_+	0	+	0.118487	0	0	0
Chr18	224994	225088	Chr18_224994_225088_-	0	-	0.181818	0	0	0
Chr18	225139	225336	Chr18_225139_225336_-	0	-	0.324049	0.249838	0.240431	0.379985
Chr18	260304	264025	Chr18_260304_264025_-	0	-	0.247406	0	0	0.106
Chr18	690631	691067	Chr18_690631_691067_-	0	-	0.456028	0	0	0
Chr18	691106	691203	Chr18_691106_691203_-	0	-	0.493754	0.308847	0.234288	0
Chr18	2920437	2920777	Chr18_2920437_2920777_-	0	-	0.230769	0.101386	0	0
Chr18	8376597	8378264	Chr18_8376597_8378264_+	0	+	0.197121	0	0	0
Chr18	12028151	12028841	Chr18_12028151_12028841_+	0	+	0.217618	0.154412	0	0
Chr18	23477086	23477178	Chr18_23477086_23477178_+	0	+	0.14491	0	0	0
Chr18	50275981	50276377	Chr18_50275981_50276377_-	0	-	0.125	0	0	0.171131
Chr18	50285247	50285324	Chr18_50285247_50285324_-	0	-	0.137255	0	0	0
Chr18	54287411	54291832	Chr18_54287411_54291832_+	0	+	0.109978	0	0	0
Chr18	78994905	78995121	Chr18_78994905_78995121_+	0	+	0.142857	0	0	0
Chr18	79966678	79968088	Chr18_79966678_79968088_+	0	+	0.574172	0.367291	0.333753	0
Chr19	436291	436379	Chr19_436291_436379_-	0	-	0.111111	0	0.176471	0
Chr19	436431	436629	Chr19_436431_436629_-	0	-	0.375	0.5628	0.304454	0
Chr19	439030	440861	Chr19_439030_440861_-	0	-	0.114757	0	0	0
Chr19	614016	615794	Chr19_614016_615794_+	0	+	0.113671	0	0	0
Chr19	617655	617776	Chr19_617655_617776_-	0	-	0.156729	0.166238	0	0.197802
Chr19	965080	966571	Chr19_965080_966571_+	0	+	0.109758	0	0	0
Chr19	1011663	1011740	Chr19_1011663_1011740_-	0	-	0.14977	0.190181	0	0
Chr19	1047654	1048894	Chr19_1047654_1048894_+	0	+	0.112981	0	0	0
Chr19	1108969	1109134	Chr19_1108969_1109134_-	0	-	0.153846	0	0	0
Chr19	1220505	1220580	Chr19_1220505_1220580_+	0	+	0.148968	0.10308	0.114638	0.2
Chr19	1271246	1271328	Chr19_1271246_1271328_+	0	+	0.109166	0	0	0.146804
Chr19	1271467	1271550	Chr19_1271467_1271550_+	0	+	0.6	0.150685	0.160874	0
Chr19	1425960	1428841	Chr19_1425960_1428841_+	0	+	0.130397	0	0	0
Chr19	1475258	1478773	Chr19_1475258_1478773_-	0	-	0.119475	0	0	0
Chr19	1578158	1578334	Chr19_1578158_1578334_-	0	-	0.184058	0	0	0
Chr19	1816569	1816697	Chr19_1816569_1816697_-	0	-	0.165736	0	0	0
Chr19	1823785	1825838	Chr19_1823785_1825838_-	0	-	0.135296	0	0	0
Chr19	1979093	1979162	Chr19_1979093_1979162_+	0	+	0.153613	0.282032	0.229452	0
Chr19	2225452	2226182	Chr19_2225452_2226182_+	0	+	0.110099	0	0	0
Chr19	2233905	2233997	Chr19_2233905_2233997_-	0	-	0.11236	0.182251	0.132504	0
Chr19	2339208	2339823	Chr19_2339208_2339823_+	0	+	0.158393	0.246879	0.174546	0
Chr19	3544732	3544808	Chr19_3544732_3544808_-	0	-	0.128232	0	0	0
Chr19	3614589	3618874	Chr19_3614589_3618874_-	0	-	0.114022	0	0	0
Chr19	3620272	3620706	Chr19_3620272_3620706_-	0	-	0.135439	0.140422	0	0
Chr19	3620802	3623687	Chr19_3620802_3623687_-	0	-	0.104989	0	0	0
Chr19	3754105	3754194	Chr19_3754105_3754194_-	0	-	0.130435	0	0	0
Chr19	4033580	4037373	Chr19_4033580_4037373_+	0	+	0.130985	0	0	0
Chr19	4174946	4175027	Chr19_4174946_4175027_-	0	-	0.251613	0.169221	0.209555	0.173743
Chr19	4175760	4175841	Chr19_4175760_4175841_-	0	-	0.105263	0.19044	0	0
Chr19	4179286	4180781	Chr19_4179286_4180781_-	0	-	0.146604	0	0	0
Chr19	4954822	4956708	Chr19_4954822_4956708_+	0	+	0.119048	0	0.135788	0
Chr19	5587399	5587700	Chr19_5587399_5587700_-	0	-	0.249585	0	0.233903	0
Chr19	5785275	5785382	Chr19_5785275_5785382_-	0	-	0.112195	0	0.256009	0
Chr19	5786542	5786748	Chr19_5786542_5786748_-	0	-	0.117647	0	0	0
Chr19	6754731	6754830	Chr19_6754731_6754830_-	0	-	0.357143	0	0.25	0
Chr19	7527628	7527863	Chr19_7527628_7527863_+	0	+	0.286529	0.224087	0	0
Chr19	7528257	7528596	Chr19_7528257_7528596_+	0	+	0.125	0.133655	0	0
Chr19	7528703	7528820	Chr19_7528703_7528820_+	0	+	0.150198	0	0	0
Chr19	7557284	7558849	Chr19_7557284_7558849_+	0	+	0.102504	0	0	0
Chr19	7610931	7611094	Chr19_7610931_7611094_+	0	+	0.105263	0	0	0
Chr19	7647511	7647724	Chr19_7647511_7647724_+	0	+	0.1	0	0	0.187034
Chr19	8465362	8465479	Chr19_8465362_8465479_+	0	+	0.729391	0.630692	0.613198	0.628087
Chr19	8511960	8512386	Chr19_8511960_8512386_-	0	-	0.111111	0	0	0
Chr19	8586470	8586557	Chr19_8586470_8586557_-	0	-	0.166667	0	0	0
Chr19	9156748	9157267	Chr19_9156748_9157267_+	0	+	0.145388	0	0.214876	0
Chr19	9338582	9339192	Chr19_9338582_9339192_+	0	+	0.197798	0.105812	0	0
Chr19	9379619	9380056	Chr19_9379619_9380056_+	0	+	0.11105	0	0	0
Chr19	9811717	9818544	Chr19_9811717_9818544_-	0	-	0.118441	0	0	0
Chr19	10110020	10110122	Chr19_10110020_10110122_+	0	+	0.145503	0	0	0
Chr19	10353098	10353527	Chr19_10353098_10353527_-	0	-	0.324268	0.316756	0	0.361005
Chr19	10395343	10395434	Chr19_10395343_10395434_-	0	-	0.243186	0.2065	0.13341	0.133304
Chr19	10450652	10450828	Chr19_10450652_10450828_+	0	+	0.141053	0	0.107118	0
Chr19	10557682	10557768	Chr19_10557682_10557768_-	0	-	0.335775	0.299117	0.212192	0.280144
Chr19	11202125	11202393	Chr19_11202125_11202393_-	0	-	0.131403	0	0	0
Chr19	11202709	11204080	Chr19_11202709_11204080_-	0	-	0.112082	0	0	0
Chr19	11486880	11486986	Chr19_11486880_11486986_-	0	-	0.1	0	0	0
Chr19	12669893	12669976	Chr19_12669893_12669976_+	0	+	0.30597	0.526718	0.395361	0.354727
Chr19	12691257	12691341	Chr19_12691257_12691341_-	0	-	0.166667	0	0	0
Chr19	12701672	12701751	Chr19_12701672_12701751_-	0	-	0.116863	0.184821	0	0
Chr19	12766240	12767394	Chr19_12766240_12767394_-	0	-	0.102601	0	0	0
Chr19	13109838	13109914	Chr19_13109838_13109914_-	0	-	0.204082	0.108445	0	0
Chr19	13144486	13144576	Chr19_13144486_13144576_-	0	-	0.133333	0	0	0
Chr19	13919202	13919817	Chr19_13919202_13919817_+	0	+	0.237315	0	0	0
Chr19	13927265	13927892	Chr19_13927265_13927892_+	0	+	0.144342	0.118761	0	0.133852
Chr19	14409447	14409535	Chr19_14409447_14409535_-	0	-	0.112642	0.215038	0.137886	0.107233
Chr19	15107521	15109055	Chr19_15107521_15109055_+	0	+	0.107182	0	0	0
Chr19	15115430	15115565	Chr19_15115430_15115565_-	0	-	0.115385	0	0	0
Chr19	15244600	15244709	Chr19_15244600_15244709_-	0	-	0.17052	0	0	0
Chr19	15399410	15400294	Chr19_15399410_15400294_-	0	-	0.131064	0.213079	0	0
Chr19	16519352	16519620	Chr19_16519352_16519620_-	0	-	0.115124	0.136859	0	0
Chr19	16519715	16520148	Chr19_16519715_16520148_-	0	-	0.306959	0	0	0
Chr19	16520265	16520363	Chr19_16520265_16520363_-	0	-	0.139785	0.183333	0.201243	0.164204
Chr19	16680581	16682420	Chr19_16680581_16682420_+	0	+	0.173365	0	0	0
Chr19	17211774	17211894	Chr19_17211774_17211894_+	0	+	0.627907	0	0	0
Chr19	17215851	17215991	Chr19_17215851_17215991_+	0	+	0.134364	0	0	0
Chr19	17226869	17226993	Chr19_17226869_17226993_+	0	+	0.747922	0.566495	0.670137	0
Chr19	17294845	17300855	Chr19_17294845_17300855_-	0	-	0.10232	0	0	0
Chr19	17325386	17327234	Chr19_17325386_17327234_-	0	-	0.108203	0	0	0
Chr19	17327569	17327688	Chr19_17327569_17327688_-	0	-	0.111111	0	0	0
Chr19	17330989	17331087	Chr19_17330989_17331087_-	0	-	0.367412	0	0	0
Chr19	17333239	17333421	Chr19_17333239_17333421_-	0	-	0.181818	0	0.271676	0.18552
Chr19	17339026	17339122	Chr19_17339026_17339122_+	0	+	0.14344	0.155579	0.107299	0
Chr19	18160969	18161053	Chr19_18160969_18161053_+	0	+	0.263158	0	0	0
Chr19	18590933	18592107	Chr19_18590933_18592107_+	0	+	0.183193	0	0	0
Chr19	19106385	19107893	Chr19_19106385_19107893_+	0	+	0.196668	0	0	0
Chr19	19303448	19303723	Chr19_19303448_19303723_-	0	-	0.196226	0	0	0
Chr19	19344926	19345303	Chr19_19344926_19345303_+	0	+	0.109091	0	0	0
Chr19	19656766	19656846	Chr19_19656766_19656846_-	0	-	0.164179	0.257294	0.346898	0
Chr19	21744115	21744940	Chr19_21744115_21744940_-	0	-	0.102824	0	0	0
Chr19	32586929	32587252	Chr19_32586929_32587252_+	0	+	0.107011	0	0	0
Chr19	34348042	34349015	Chr19_34348042_34349015_+	0	+	0.107023	0	0	0
Chr19	35267734	35267823	Chr19_35267734_35267823_+	0	+	0.102226	0	0.133858	0
Chr19	35547029	35547118	Chr19_35547029_35547118_+	0	+	0.101825	0	0	0
Chr19	35613792	35613867	Chr19_35613792_35613867_+	0	+	0.173996	0	0.137564	0
Chr19	35618465	35618568	Chr19_35618465_35618568_+	0	+	0.16309	0	0.103219	0
Chr19	35723502	35723731	Chr19_35723502_35723731_+	0	+	0.180982	0	0	0.274153
Chr19	35724007	35724636	Chr19_35724007_35724636_+	0	+	0.11531	0	0	0
Chr19	35744145	35744322	Chr19_35744145_35744322_-	0	-	0.385321	0	0	0
Chr19	35752999	35753086	Chr19_35752999_35753086_+	0	+	0.102015	0	0	0
Chr19	35785334	35785408	Chr19_35785334_35785408_+	0	+	0.1	0	0	0
Chr19	36099617	36100747	Chr19_36099617_36100747_+	0	+	0.171904	0	0	0
Chr19	36101774	36102013	Chr19_36101774_36102013_+	0	+	0.203312	0	0	0
Chr19	36103074	36103155	Chr19_36103074_36103155_+	0	+	0.125	0.111678	0.220954	0
Chr19	36103207	36103342	Chr19_36103207_36103342_+	0	+	0.108392	0	0	0
Chr19	38405421	38405518	Chr19_38405421_38405518_+	0	+	0.2	0	0	0.146992
Chr19	38840376	38840487	Chr19_38840376_38840487_-	0	-	0.186741	0.133689	0.134975	0
Chr19	38915906	38916036	Chr19_38915906_38916036_-	0	-	0.131141	0	0	0
Chr19	38918008	38918093	Chr19_38918008_38918093_-	0	-	0.154545	0.240196	0	0
Chr19	39383291	39383498	Chr19_39383291_39383498_+	0	+	0.525424	0.349898	0.529677	0.427656
Chr19	39420996	39421074	Chr19_39420996_39421074_+	0	+	0.206299	0	0	0
Chr19	40212976	40213075	Chr19_40212976_40213075_+	0	+	0.1	0	0	0
Chr19	40605831	40606232	Chr19_40605831_40606232_+	0	+	0.170044	0	0	0.15354
Chr19	42249738	42249826	Chr19_42249738_42249826_-	0	-	0.132203	0.141893	0.111816	0.1659
Chr19	43988558	43991547	Chr19_43988558_43991547_+	0	+	0.16002	0	0	0
Chr19	44100927	44101132	Chr19_44100927_44101132_+	0	+	0.202752	0	0	0
Chr19	44819192	44819345	Chr19_44819192_44819345_+	0	+	0.111727	0	0	0
Chr19	45064227	45064342	Chr19_45064227_45064342_+	0	+	0.555556	0.493837	0.423847	0
Chr19	45143633	45144853	Chr19_45143633_45144853_+	0	+	0.131233	0	0	0
Chr19	45145260	45145352	Chr19_45145260_45145352_+	0	+	0.301848	0.180294	0.185515	0
Chr19	45351017	45351285	Chr19_45351017_45351285_+	0	+	0.845443	0.739159	0.699639	0
Chr19	45619191	45621206	Chr19_45619191_45621206_-	0	-	0.252119	0	0	0
Chr19	47036129	47039035	Chr19_47036129_47039035_+	0	+	0.118374	0	0	0
Chr19	47046252	47046592	Chr19_47046252_47046592_-	0	-	0.10514	0	0	0
Chr19	47415101	47416651	Chr19_47415101_47416651_-	0	-	0.104059	0	0	0.10889
Chr19	47699059	47699302	Chr19_47699059_47699302_+	0	+	0.12327	0	0	0
Chr19	47699405	47701327	Chr19_47699405_47701327_+	0	+	0.155458	0	0	0
Chr19	48342809	48343320	Chr19_48342809_48343320_-	0	-	0.177914	0	0	0
Chr19	48626362	48627691	Chr19_48626362_48627691_+	0	+	0.202513	0	0	0
Chr19	48628069	48628161	Chr19_48628069_48628161_+	0	+	0.133144	0	0	0
Chr19	48837551	48838016	Chr19_48837551_48838016_-	0	-	0.114776	0	0	0
Chr19	48845446	48845516	Chr19_48845446_48845516_-	0	-	0.166667	0	0	0
Chr19	48955599	48955686	Chr19_48955599_48955686_+	0	+	0.12126	0.126692	0	0.145345
Chr19	48987385	48991301	Chr19_48987385_48991301_-	0	-	0.113103	0	0	0
Chr19	49118018	49118351	Chr19_49118018_49118351_+	0	+	0.643052	0	0	0
Chr19	49148258	49148665	Chr19_49148258_49148665_+	0	+	0.242857	0	0	0
Chr19	49150151	49150235	Chr19_49150151_49150235_+	0	+	0.285714	0.283906	0.252874	0.439528
Chr19	49447099	49447337	Chr19_49447099_49447337_-	0	-	0.121895	0	0	0
Chr19	49447908	49448000	Chr19_49447908_49448000_-	0	-	0.171445	0.22177	0.206442	0
Chr19	49462036	49462569	Chr19_49462036_49462569_+	0	+	0.176471	0	0	0
Chr19	49861365	49861448	Chr19_49861365_49861448_-	0	-	0.169306	0.122642	0.322816	0.159408
Chr19	49861695	49861771	Chr19_49861695_49861771_-	0	-	0.163934	0	0	0.185927
Chr19	49861881	49862043	Chr19_49861881_49862043_-	0	-	0.30619	0.262287	0.298729	0
Chr19	49862105	49862184	Chr19_49862105_49862184_-	0	-	0.218103	0.123145	0.275232	0
Chr19	49865426	49866398	Chr19_49865426_49866398_-	0	-	0.241424	0.245874	0.273312	0.162917
Chr19	49887573	49887717	Chr19_49887573_49887717_+	0	+	0.153846	0	0	0
Chr19	50378439	50378521	Chr19_50378439_50378521_+	0	+	0.107143	0	0.198606	0
Chr19	50415826	50416395	Chr19_50415826_50416395_+	0	+	0.162571	0	0.258041	0
Chr19	51581882	51586626	Chr19_51581882_51586626_+	0	+	0.150249	0	0	0
Chr19	51701726	51702628	Chr19_51701726_51702628_+	0	+	0.294518	0	0	0
Chr19	51703098	51703227	Chr19_51703098_51703227_+	0	+	0.379747	0.397921	0.131783	0
Chr19	54458521	54460765	Chr19_54458521_54460765_+	0	+	0.75555	0.747643	0	0
Chr19	55093076	55093152	Chr19_55093076_55093152_-	0	-	0.364668	0	0.433723	0
Chr19	57543243	57543650	Chr19_57543243_57543650_-	0	-	0.263688	0	0	0
Chr19	57809103	57813293	Chr19_57809103_57813293_-	0	-	0.133085	0	0	0.108287
Chr19	58469306	58469727	Chr19_58469306_58469727_+	0	+	0.164134	0	0	0
Chr19	58469844	58470730	Chr19_58469844_58470730_+	0	+	0.149302	0	0	0
Chr19	58478181	58479642	Chr19_58478181_58479642_+	0	+	0.114329	0	0	0
Chr2	9990747	9992006	Chr2_9990747_9992006_+	0	+	0.209234	0.120334	0.172306	0
Chr2	9993244	9995878	Chr2_9993244_9995878_+	0	+	0.12966	0.134388	0	0.16578
Chr2	9999029	10000592	Chr2_9999029_10000592_+	0	+	0.134856	0	0	0
Chr2	17774401	17778001	Chr2_17774401_17778001_+	0	+	0.101499	0	0	0
Chr2	19932447	19933400	Chr2_19932447_19933400_-	0	-	0.101763	0	0	0
Chr2	19951484	19953833	Chr2_19951484_19953833_-	0	-	0.158913	0	0	0
Chr2	27067646	27068631	Chr2_27067646_27068631_+	0	+	0.133802	0	0	0
Chr2	27102430	27102525	Chr2_27102430_27102525_-	0	-	0.10828	0	0	0
Chr2	27328189	27328467	Chr2_27328189_27328467_-	0	-	0.102323	0	0	0
Chr2	27366936	27367073	Chr2_27366936_27367073_-	0	-	0.113155	0	0.139169	0.130046
Chr2	27368139	27368371	Chr2_27368139_27368371_-	0	-	0.171512	0.180732	0	0
Chr2	27457976	27458125	Chr2_27457976_27458125_-	0	-	0.103448	0.224294	0.23961	0
Chr2	27462793	27463096	Chr2_27462793_27463096_-	0	-	0.129715	0	0	0
Chr2	28850242	28850327	Chr2_28850242_28850327_-	0	-	0.186158	0	0	0
Chr2	37202865	37202949	Chr2_37202865_37202949_-	0	-	0.586062	0.327312	0.440023	0.554556
Chr2	42054307	42054940	Chr2_42054307_42054940_+	0	+	0.234402	0.176541	0.107147	0
Chr2	42057394	42057602	Chr2_42057394_42057602_+	0	+	0.127046	0.119581	0	0
Chr2	43231343	43232712	Chr2_43231343_43232712_-	0	-	0.123313	0	0	0.192272
Chr2	43291768	43292103	Chr2_43291768_43292103_-	0	-	0.151355	0	0.347718	0.174023
Chr2	55615506	55617143	Chr2_55615506_55617143_-	0	-	0.14986	0	0	0
Chr2	58161638	58162865	Chr2_58161638_58162865_-	0	-	0.136053	0.114451	0.106157	0
Chr2	58162947	58163028	Chr2_58162947_58163028_-	0	-	0.335712	0.243684	0.198106	0.271143
Chr2	60918295	60918393	Chr2_60918295_60918393_+	0	+	0.166667	0	0	0
Chr2	61117385	61117466	Chr2_61117385_61117466_+	0	+	0.379679	0.263279	0	0.210526
Chr2	61185618	61186445	Chr2_61185618_61186445_+	0	+	0.409725	0.52888	0.422414	0
Chr2	61189069	61190270	Chr2_61189069_61190270_-	0	-	0.147214	0.168858	0.17803	0.187651
Chr2	71075642	71076603	Chr2_71075642_71076603_+	0	+	0.191154	0	0	0
Chr2	74365241	74365514	Chr2_74365241_74365514_-	0	-	0.125808	0	0	0
Chr2	74427592	74428267	Chr2_74427592_74428267_-	0	-	0.259925	0.203896	0.241412	0
Chr2	74428396	74428630	Chr2_74428396_74428630_-	0	-	0.134962	0	0	0.103586
Chr2	74430518	74430615	Chr2_74430518_74430615_-	0	-	0.151515	0	0	0
Chr2	74474802	74474915	Chr2_74474802_74474915_-	0	-	0.451997	0.307437	0	0.268974
Chr2	74475115	74475224	Chr2_74475115_74475224_-	0	-	0.142857	0.121286	0.299385	0.186627
Chr2	74492229	74492303	Chr2_74492229_74492303_+	0	+	0.198459	0	0.253142	0.162109
Chr2	74492445	74492645	Chr2_74492445_74492645_+	0	+	0.12844	0	0.161053	0
Chr2	74505638	74505736	Chr2_74505638_74505736_-	0	-	0.163636	0.218467	0	0.111111
Chr2	74505770	74505951	Chr2_74505770_74505951_-	0	-	0.129696	0	0	0
Chr2	74528006	74528247	Chr2_74528006_74528247_-	0	-	0.18263	0	0.114167	0.139668
Chr2	74528321	74528416	Chr2_74528321_74528416_-	0	-	0.123094	0.104708	0	0.102845
Chr2	74528935	74529131	Chr2_74528935_74529131_-	0	-	0.45582	0.218594	0.231513	0.249864
Chr2	74675384	74675524	Chr2_74675384_74675524_+	0	+	0.134443	0	0	0
Chr2	75666053	75670137	Chr2_75666053_75670137_-	0	-	0.196175	0	0	0.189899
Chr2	85542373	85542564	Chr2_85542373_85542564_+	0	+	0.130592	0.109597	0.126015	0
Chr2	85599317	85599524	Chr2_85599317_85599524_-	0	-	0.142237	0	0	0
Chr2	85611786	85611877	Chr2_85611786_85611877_-	0	-	0.477435	0.470479	0.429419	0.44478
Chr2	85648853	85649016	Chr2_85648853_85649016_+	0	+	0.904748	0	0.865047	0.884303
Chr2	86127305	86127940	Chr2_86127305_86127940_+	0	+	0.105421	0	0	0
Chr2	95412764	95412894	Chr2_95412764_95412894_+	0	+	0.709619	0.897523	0	0
Chr2	96021233	96021367	Chr2_96021233_96021367_+	0	+	0.291872	0	0	0
Chr2	96268658	96269267	Chr2_96268658_96269267_+	0	+	0.189134	0	0.252469	0.165636
Chr2	96825201	96826832	Chr2_96825201_96826832_+	0	+	0.136394	0	0.169682	0
Chr2	96828195	96828566	Chr2_96828195_96828566_+	0	+	0.1333	0	0	0
Chr2	96828700	96828995	Chr2_96828700_96828995_+	0	+	0.100695	0.149541	0	0
Chr2	96829134	96832551	Chr2_96829134_96832551_+	0	+	0.133659	0	0	0
Chr2	96861455	96861578	Chr2_96861455_96861578_-	0	-	0.196942	0	0	0
Chr2	96861894	96863681	Chr2_96861894_96863681_-	0	-	0.144404	0	0	0.112559
Chr2	96864880	96864963	Chr2_96864880_96864963_-	0	-	0.148148	0	0	0
Chr2	97083817	97083947	Chr2_97083817_97083947_-	0	-	0.296188	0	0.168504	0
Chr2	97656960	97657151	Chr2_97656960_97657151_-	0	-	0.10995	0	0	0
Chr2	97660646	97661881	Chr2_97660646_97661881_-	0	-	0.101507	0	0	0.107668
Chr2	98616533	98618167	Chr2_98616533_98618167_+	0	+	0.112474	0	0	0.159747
Chr2	99169470	99169549	Chr2_99169470_99169549_-	0	-	0.279006	0.356615	0.211538	0.357751
Chr2	99171429	99171509	Chr2_99171429_99171509_-	0	-	0.122807	0	0	0
Chr2	99402800	99402888	Chr2_99402800_99402888_-	0	-	0.183539	0	0	0.228595
Chr2	99403106	99403694	Chr2_99403106_99403694_-	0	-	0.34352	0	0	0.200821
Chr2	99406106	99406324	Chr2_99406106_99406324_-	0	-	0.173432	0	0	0
Chr2	100395614	100397907	Chr2_100395614_100397907_-	0	-	0.113336	0	0	0
Chr2	100988276	100990255	Chr2_100988276_100990255_+	0	+	0.114677	0	0	0
Chr2	101008273	101010928	Chr2_101008273_101010928_-	0	-	0.176991	0	0	0
Chr2	101011540	101021680	Chr2_101011540_101021680_-	0	-	0.335425	0.167855	0	0
Chr2	101021746	101022280	Chr2_101021746_101022280_-	0	-	0.169708	0.10894	0	0
Chr2	101269136	101269215	Chr2_101269136_101269215_+	0	+	0.164577	0	0	0
Chr2	105342974	105343100	Chr2_105342974_105343100_+	0	+	0.877655	0.740952	0.74015	0.846212
Chr2	109544324	109546049	Chr2_109544324_109546049_-	0	-	0.338107	0.308202	0.26963	0
Chr2	113731648	113734585	Chr2_113731648_113734585_-	0	-	0.111405	0	0	0
Chr2	117935579	117936701	Chr2_117935579_117936701_-	0	-	0.337258	0.27809	0	0
Chr2	127289501	127289688	Chr2_127289501_127289688_-	0	-	0.183559	0	0	0
Chr2	127289824	127290223	Chr2_127289824_127290223_-	0	-	0.19637	0.189735	0	0
Chr2	131516404	131516856	Chr2_131516404_131516856_+	0	+	0.12844	0	0	0
Chr2	134946146	134947735	Chr2_134946146_134947735_+	0	+	0.298491	0	0	0
Chr2	134954379	134954480	Chr2_134954379_134954480_+	0	+	0.608925	0.532491	0.65977	0.725926
Chr2	135753567	135754158	Chr2_135753567_135754158_+	0	+	0.192797	0	0	0
Chr2	150487455	150487548	Chr2_150487455_150487548_-	0	-	0.837713	0	0.602273	0.742268
Chr2	152619158	152619508	Chr2_152619158_152619508_+	0	+	0.32	0	0.106908	0
Chr2	152717625	152717830	Chr2_152717625_152717830_-	0	-	0.453017	0.696154	0	0.53499
Chr2	156579001	156579085	Chr2_156579001_156579085_+	0	+	0.142857	0.102564	0	0
Chr2	162359157	162359493	Chr2_162359157_162359493_+	0	+	0.144593	0	0	0
Chr2	164497283	164497373	Chr2_164497283_164497373_-	0	-	0.172414	0	0.2	0
Chr2	169697531	169700945	Chr2_169697531_169700945_+	0	+	0.146844	0	0	0
Chr2	171480193	171480973	Chr2_171480193_171480973_+	0	+	0.107246	0	0	0.150701
Chr2	173363895	173364794	Chr2_173363895_173364794_+	0	+	0.396018	0	0	0
Chr2	176123585	176123933	Chr2_176123585_176123933_+	0	+	0.378995	0	0	0
Chr2	178123651	178123827	Chr2_178123651_178123827_+	0	+	0.122776	0	0	0
Chr2	178387139	178389008	Chr2_178387139_178389008_+	0	+	0.115952	0	0	0
Chr2	178444500	178447504	Chr2_178444500_178447504_-	0	-	0.126611	0	0	0
Chr2	181918675	181918754	Chr2_181918675_181918754_+	0	+	0.16	0	0	0
Chr2	189469439	189470075	Chr2_189469439_189470075_+	0	+	0.117388	0	0.102332	0.119204
Chr2	189754345	189755172	Chr2_189754345_189755172_-	0	-	0.110362	0	0	0.108384
Chr2	189864228	189867798	Chr2_189864228_189867798_+	0	+	0.256537	0	0	0
Chr2	199936492	199938932	Chr2_199936492_199938932_-	0	-	0.160259	0	0	0
Chr2	199939070	199940088	Chr2_199939070_199940088_-	0	-	0.102098	0	0	0
Chr2	200913413	200913930	Chr2_200913413_200913930_-	0	-	0.234696	0	0	0
Chr2	201701889	201704121	Chr2_201701889_201704121_-	0	-	0.149452	0	0	0
Chr2	218277453	218277632	Chr2_218277453_218277632_-	0	-	0.117647	0	0	0
Chr2	218340786	218341533	Chr2_218340786_218341533_+	0	+	0.248301	0	0.181818	0
Chr2	218696601	218697038	Chr2_218696601_218697038_+	0	+	0.483951	0.497759	0	0
Chr2	218698001	218698601	Chr2_218698001_218698601_+	0	+	0.112782	0	0.134556	0
Chr2	219207421	219207647	Chr2_219207421_219207647_+	0	+	0.119021	0	0	0
Chr2	219213065	219213240	Chr2_219213065_219213240_-	0	-	0.117647	0	0.113499	0
Chr2	219215082	219215996	Chr2_219215082_219215996_-	0	-	0.23164	0	0	0
Chr2	219232683	219233078	Chr2_219232683_219233078_+	0	+	0.11193	0	0	0
Chr2	219233191	219233285	Chr2_219233191_219233285_+	0	+	0.151844	0	0	0.111111
Chr2	219234288	219234825	Chr2_219234288_219234825_+	0	+	0.61881	0.652509	0.376457	0.699943
Chr2	219235312	219235473	Chr2_219235312_219235473_+	0	+	0.565615	0	0.388164	0.395184
Chr2	219235585	219235707	Chr2_219235585_219235707_+	0	+	0.514026	0.383816	0	0.335397
Chr2	219490648	219490732	Chr2_219490648_219490732_+	0	+	0.1	0	0	0
Chr2	219491869	219492110	Chr2_219491869_219492110_+	0	+	0.172107	0	0	0
Chr2	219556292	219556453	Chr2_219556292_219556453_-	0	-	0.542786	0.340324	0	0.421801
Chr2	219556723	219557822	Chr2_219556723_219557822_-	0	-	0.39254	0	0	0
Chr2	219558110	219558183	Chr2_219558110_219558183_-	0	-	0.131833	0.148649	0	0
Chr2	219567126	219567272	Chr2_219567126_219567272_-	0	-	0.211979	0.16302	0	0
Chr2	219567575	219567717	Chr2_219567575_219567717_-	0	-	0.115044	0	0	0
Chr2	219612058	219613127	Chr2_219612058_219613127_+	0	+	0.125914	0	0	0
Chr2	229858831	229858918	Chr2_229858831_229858918_-	0	-	0.852469	0.927344	0.825254	0.922995
Chr2	230037531	230045744	Chr2_230037531_230045744_-	0	-	0.111344	0	0	0
Chr2	230176724	230177537	Chr2_230176724_230177537_-	0	-	0.243117	0	0	0
Chr2	232480252	232480398	Chr2_232480252_232480398_-	0	-	0.119497	0	0	0.157895
Chr2	232881250	232882185	Chr2_232881250_232882185_-	0	-	0.118241	0.108989	0	0.11244
Chr2	233289974	233290247	Chr2_233289974_233290247_+	0	+	0.223029	0	0.112193	0.180623
Chr2	233292277	233292386	Chr2_233292277_233292386_+	0	+	0.1	0	0	0
Chr2	233446796	233448086	Chr2_233446796_233448086_+	0	+	0.131906	0	0	0
Chr2	233462735	233464163	Chr2_233462735_233464163_+	0	+	0.155756	0	0.103473	0.167593
Chr2	233467203	233468422	Chr2_233467203_233468422_+	0	+	0.14241	0	0	0
Chr2	233524562	233525477	Chr2_233524562_233525477_-	0	-	0.180998	0	0	0
Chr2	234495836	234496011	Chr2_234495836_234496011_-	0	-	0.932221	0.970575	0.952443	0.973177
Chr2	237769992	237772080	Chr2_237769992_237772080_+	0	+	0.283553	0.145462	0.168582	0
Chr2	238083354	238091217	Chr2_238083354_238091217_+	0	+	0.109495	0	0	0
Chr2	238161716	238162735	Chr2_238161716_238162735_+	0	+	0.170252	0	0	0
Chr2	238164183	238164269	Chr2_238164183_238164269_+	0	+	0.153846	0	0	0
Chr2	238170676	238170942	Chr2_238170676_238170942_-	0	-	0.110498	0	0	0
Chr2	240594047	240594542	Chr2_240594047_240594542_+	0	+	0.129111	0	0.103131	0
Chr2	240596521	240596680	Chr2_240596521_240596680_+	0	+	0.16371	0	0	0
Chr2	241133030	241135870	Chr2_241133030_241135870_-	0	-	0.139117	0	0.132567	0
Chr2	241491679	241492928	Chr2_241491679_241492928_+	0	+	0.140037	0	0	0
Chr2	241498349	241498638	Chr2_241498349_241498638_-	0	-	0.116513	0	0	0
Chr2	241499414	241500172	Chr2_241499414_241500172_-	0	-	0.201942	0.230426	0.226416	0
Chr2	241654647	241655270	Chr2_241654647_241655270_+	0	+	0.109067	0	0	0
Chr20	276879	277043	Chr20_276879_277043_-	0	-	0.314444	0	0	0
Chr20	421031	422126	Chr20_421031_422126_+	0	+	0.365621	0	0	0
Chr20	441689	441856	Chr20_441689_441856_-	0	-	0.2	0	0	0
Chr20	2655746	2655933	Chr20_2655746_2655933_+	0	+	0.107776	0	0.151494	0
Chr20	2660590	2660696	Chr20_2660590_2660696_-	0	-	0.105203	0	0	0
Chr20	2748630	2749400	Chr20_2748630_2749400_+	0	+	0.119646	0	0	0
Chr20	2751987	2752085	Chr20_2751987_2752085_+	0	+	0.290323	0.283737	0.239819	0
Chr20	2839933	2840210	Chr20_2839933_2840210_-	0	-	0.356672	0.421017	0	0
Chr20	3218632	3221840	Chr20_3218632_3221840_+	0	+	0.101409	0	0	0
Chr20	3260028	3264437	Chr20_3260028_3264437_-	0	-	0.101403	0.206434	0	0
Chr20	4181976	4182088	Chr20_4181976_4182088_+	0	+	0.135011	0	0	0
Chr20	5584322	5586193	Chr20_5584322_5586193_-	0	-	0.128494	0	0	0
Chr20	5957229	5958527	Chr20_5957229_5958527_+	0	+	0.317648	0	0.110835	0.144886
Chr20	9473365	9476716	Chr20_9473365_9476716_+	0	+	0.16065	0	0	0
Chr20	13785290	13787311	Chr20_13785290_13787311_+	0	+	0.113065	0	0	0
Chr20	23369741	23370090	Chr20_23369741_23370090_+	0	+	0.108305	0	0	0
Chr20	25012664	25012811	Chr20_25012664_25012811_-	0	-	0.117647	0	0	0
Chr20	33408888	33410134	Chr20_33408888_33410134_-	0	-	0.119885	0	0	0
Chr20	34851368	34852154	Chr20_34851368_34852154_-	0	-	0.274539	0	0.223022	0.284154
Chr20	35006575	35007549	Chr20_35006575_35007549_-	0	-	0.133841	0	0	0
Chr20	35007640	35008663	Chr20_35007640_35008663_-	0	-	0.141969	0.16596	0	0
Chr20	35507851	35508034	Chr20_35507851_35508034_+	0	+	0.10523	0	0	0
Chr20	35626803	35627279	Chr20_35626803_35627279_-	0	-	0.179603	0	0.15475	0
Chr20	38765518	38766237	Chr20_38765518_38766237_+	0	+	0.162801	0	0	0
Chr20	41162992	41163202	Chr20_41162992_41163202_+	0	+	0.45642	0.26401	0.228221	0.251527
Chr20	41163275	41163377	Chr20_41163275_41163377_+	0	+	0.262136	0.180723	0	0
Chr20	41166859	41167851	Chr20_41166859_41167851_+	0	+	0.166675	0.104827	0	0
Chr20	41352699	41352797	Chr20_41352699_41352797_+	0	+	0.142857	0.114286	0	0.150442
Chr20	41358034	41358236	Chr20_41358034_41358236_+	0	+	0.428571	0	0	0.580645
Chr20	41358351	41358438	Chr20_41358351_41358438_+	0	+	0.102378	0	0.129679	0
Chr20	41451105	41451825	Chr20_41451105_41451825_-	0	-	0.125	0	0.131967	0
Chr20	45897040	45897716	Chr20_45897040_45897716_+	0	+	0.126053	0.123197	0	0
Chr20	45899538	45899621	Chr20_45899538_45899621_-	0	-	0.124052	0	0	0
Chr20	45950373	45950452	Chr20_45950373_45950452_-	0	-	0.101898	0	0	0
Chr20	49884066	49886751	Chr20_49884066_49886751_+	0	+	0.201131	0	0	0
Chr20	50581460	50582691	Chr20_50581460_50582691_+	0	+	0.269515	0	0.255891	0.205034
Chr20	58714670	58715167	Chr20_58714670_58715167_+	0	+	0.212439	0.135994	0	0.1848
Chr20	58993764	58994109	Chr20_58993764_58994109_+	0	+	0.105998	0.166863	0.142802	0.1732
Chr20	62202843	62203083	Chr20_62202843_62203083_+	0	+	0.100115	0	0.11129	0
Chr20	62394265	62394936	Chr20_62394265_62394936_-	0	-	0.119257	0	0	0.110581
Chr20	62667910	62668011	Chr20_62667910_62668011_+	0	+	0.116041	0	0.215643	0
Chr20	62807605	62808246	Chr20_62807605_62808246_+	0	+	0.247024	0	0	0
Chr20	63562382	63562519	Chr20_63562382_63562519_-	0	-	0.125	0	0	0
Chr20	63678183	63678267	Chr20_63678183_63678267_+	0	+	0.153846	0	0.119589	0
Chr20	63689865	63690086	Chr20_63689865_63690086_+	0	+	0.105263	0	0	0
Chr20	63690210	63690293	Chr20_63690210_63690293_+	0	+	0.1	0	0	0
Chr20	63695221	63695327	Chr20_63695221_63695327_+	0	+	0.129489	0	0	0
Chr20	63700530	63700601	Chr20_63700530_63700601_-	0	-	0.220779	0.161656	0.373259	0.290673
Chr20	63740531	63741369	Chr20_63740531_63741369_+	0	+	0.164501	0.127119	0	0
Chr20	63941043	63941109	Chr20_63941043_63941109_-	0	-	0.144524	0.221825	0.187384	0.20332
Chr20	63943669	63944396	Chr20_63943669_63944396_-	0	-	0.202013	0.258595	0.213258	0
Chr20	63945975	63946160	Chr20_63945975_63946160_-	0	-	0.144771	0.234137	0.253468	0.184269
Chr21	26840061	26840275	Chr21_26840061_26840275_-	0	-	0.120278	0	0	0.186039
Chr21	32333419	32334162	Chr21_32333419_32334162_-	0	-	0.159544	0	0	0
Chr21	33582055	33582164	Chr21_33582055_33582164_-	0	-	0.141987	0	0.138288	0.110207
Chr21	33586181	33587521	Chr21_33586181_33587521_-	0	-	0.110032	0	0	0
Chr21	36035960	36036084	Chr21_36035960_36036084_-	0	-	0.35814	0.311377	0.214286	0.2
Chr21	41991889	41992492	Chr21_41991889_41992492_-	0	-	0.772598	0.486541	0.634477	0.677027
Chr21	42574915	42579735	Chr21_42574915_42579735_+	0	+	0.175768	0	0.143109	0
Chr21	43802387	43803511	Chr21_43802387_43803511_+	0	+	0.213102	0	0	0.187295
Chr21	44333262	44335757	Chr21_44333262_44335757_-	0	-	0.275933	0	0	0.115104
Chr21	44335804	44337648	Chr21_44335804_44337648_-	0	-	0.144976	0	0	0
Chr21	46388884	46389198	Chr21_46388884_46389198_+	0	+	0.1	0	0	0.119048
Chr21	46442573	46443809	Chr21_46442573_46443809_+	0	+	0.197514	0	0	0
Chr21	46443948	46444693	Chr21_46443948_46444693_+	0	+	0.268288	0	0	0.361195
Chr21	46551904	46554168	Chr21_46551904_46554168_+	0	+	0.229864	0	0	0
Chr21	46560783	46561747	Chr21_46560783_46561747_+	0	+	0.255019	0	0.153731	0
Chr22	16652483	16652932	Chr22_16652483_16652932_+	0	+	0.790273	0	0	0
Chr22	17102043	17102138	Chr22_17102043_17102138_+	0	+	0.133477	0.157895	0.150371	0
Chr22	17539119	17540411	Chr22_17539119_17540411_+	0	+	0.110266	0	0	0
Chr22	19139729	19139854	Chr22_19139729_19139854_-	0	-	0.102564	0	0	0
Chr22	19179969	19180198	Chr22_19179969_19180198_-	0	-	0.105263	0	0	0.235859
Chr22	19180806	19183389	Chr22_19180806_19183389_-	0	-	0.17476	0	0	0
Chr22	19196415	19196488	Chr22_19196415_19196488_-	0	-	0.285714	0	0	0
Chr22	19196656	19199733	Chr22_19196656_19199733_-	0	-	0.100989	0	0.135279	0
Chr22	19233318	19233421	Chr22_19233318_19233421_-	0	-	0.1	0	0	0
Chr22	19514887	19514964	Chr22_19514887_19514964_+	0	+	0.102659	0	0	0
Chr22	19723579	19723853	Chr22_19723579_19723853_+	0	+	0.454545	0	0.143454	0.317941
Chr22	20089811	20089975	Chr22_20089811_20089975_+	0	+	0.437387	0	0.263937	0.36127
Chr22	20106698	20107270	Chr22_20106698_20107270_+	0	+	0.127154	0.284133	0.146129	0.128942
Chr22	20115079	20115265	Chr22_20115079_20115265_-	0	-	0.430243	0.324391	0.234377	0.278846
Chr22	20400758	20401276	Chr22_20400758_20401276_+	0	+	0.122499	0	0	0
Chr22	20585015	20585100	Chr22_20585015_20585100_+	0	+	0.159936	0.217906	0.133896	0.173681
Chr22	20712797	20713280	Chr22_20712797_20713280_-	0	-	0.125197	0.101078	0.127759	0
Chr22	20992369	20992793	Chr22_20992369_20992793_+	0	+	0.113721	0	0.165336	0
Chr22	20992904	20993661	Chr22_20992904_20993661_+	0	+	0.141656	0	0	0
Chr22	20996801	20996885	Chr22_20996801_20996885_+	0	+	0.15493	0.315029	0.307305	0.313535
Chr22	21000787	21001255	Chr22_21000787_21001255_-	0	-	0.281682	0.294852	0.167795	0
Chr22	21629761	21629850	Chr22_21629761_21629850_-	0	-	0.193313	0.315653	0.287367	0.219808
Chr22	21694665	21694754	Chr22_21694665_21694754_+	0	+	0.108108	0	0	0
Chr22	21925662	21931147	Chr22_21925662_21931147_-	0	-	0.105624	0	0	0
Chr22	23838445	23838563	Chr22_23838445_23838563_-	0	-	0.235387	0	0.214286	0.127907
Chr22	23838637	23838710	Chr22_23838637_23838710_-	0	-	0.142857	0	0.184454	0
Chr22	23838776	23838894	Chr22_23838776_23838894_-	0	-	0.493988	0	0	0
Chr22	23882869	23883771	Chr22_23882869_23883771_+	0	+	0.419988	0	0	0
Chr22	26492368	26494138	Chr22_26492368_26494138_-	0	-	0.328885	0.267964	0.213787	0.290505
Chr22	29260613	29260701	Chr22_29260613_29260701_-	0	-	0.131498	0.10559	0.142661	0
Chr22	29291599	29292136	Chr22_29291599_29292136_+	0	+	0.296609	0.165117	0	0.182463
Chr22	29310998	29311461	Chr22_29310998_29311461_+	0	+	0.249692	0	0	0
Chr22	30016698	30017926	Chr22_30016698_30017926_+	0	+	0.165098	0	0	0
Chr22	30379622	30379710	Chr22_30379622_30379710_-	0	-	0.423077	0.43371	0.324675	0
Chr22	30384495	30385903	Chr22_30384495_30385903_-	0	-	0.140643	0	0	0
Chr22	30386141	30386615	Chr22_30386141_30386615_-	0	-	0.198492	0	0.163763	0
Chr22	30416087	30416233	Chr22_30416087_30416233_+	0	+	0.133333	0.113363	0	0.111111
Chr22	30887618	30888222	Chr22_30887618_30888222_+	0	+	0.131669	0	0	0
Chr22	30888340	30889176	Chr22_30888340_30889176_+	0	+	0.135917	0	0	0
Chr22	31097060	31097268	Chr22_31097060_31097268_+	0	+	0.524245	0.383842	0	0
Chr22	31613855	31614788	Chr22_31613855_31614788_+	0	+	0.606254	0	0.335494	0.446869
Chr22	31614860	31615047	Chr22_31614860_31615047_+	0	+	0.210673	0.207167	0	0.167218
Chr22	31618226	31618313	Chr22_31618226_31618313_+	0	+	0.176471	0.15	0.291621	0.518447
Chr22	31623849	31625762	Chr22_31623849_31625762_-	0	-	0.186114	0	0	0
Chr22	37630170	37630902	Chr22_37630170_37630902_+	0	+	0.130491	0	0	0
Chr22	38128430	38129453	Chr22_38128430_38129453_-	0	-	0.108434	0	0	0
Chr22	38670989	38671069	Chr22_38670989_38671069_+	0	+	0.173376	0.152294	0	0
Chr22	38739426	38739721	Chr22_38739426_38739721_-	0	-	0.107397	0.160433	0.166088	0.174537
Chr22	38739943	38740266	Chr22_38739943_38740266_-	0	-	0.166742	0.272316	0	0
Chr22	38741571	38742300	Chr22_38741571_38742300_-	0	-	0.21618	0.190221	0.213876	0.133141
Chr22	39045542	39049424	Chr22_39045542_39049424_+	0	+	0.207146	0	0	0
Chr22	40408842	40408932	Chr22_40408842_40408932_+	0	+	0.142857	0.113878	0.112825	0.14131
Chr22	41526453	41527287	Chr22_41526453_41527287_+	0	+	0.298968	0.353848	0.36594	0.305762
Chr22	41527420	41527900	Chr22_41527420_41527900_+	0	+	0.184012	0.266924	0.349577	0.297861
Chr22	44732391	44735026	Chr22_44732391_44735026_+	0	+	0.147146	0	0	0
Chr22	44735162	44736771	Chr22_44735162_44736771_+	0	+	0.12952	0	0	0
Chr22	46355588	46355989	Chr22_46355588_46355989_+	0	+	0.151523	0	0.212631	0
Chr22	49904066	49904178	Chr22_49904066_49904178_-	0	-	0.272497	0.270609	0.307006	0.295732
Chr22	49961032	49961124	Chr22_49961032_49961124_+	0	+	0.153935	0.120953	0.115692	0.105385
Chr22	49961234	49961317	Chr22_49961234_49961317_+	0	+	0.119318	0	0	0
Chr22	50197995	50198074	Chr22_50197995_50198074_+	0	+	0.500615	0.344216	0.388926	0
Chr22	50218117	50218188	Chr22_50218117_50218188_-	0	-	0.306393	0.407945	0.47314	0.424084
Chr22	50218897	50219067	Chr22_50218897_50219067_-	0	-	0.127273	0.172382	0	0
Chr22	50246376	50246678	Chr22_50246376_50246678_-	0	-	0.183391	0	0	0
Chr22	50246735	50246874	Chr22_50246735_50246874_-	0	-	0.155752	0.361035	0.339564	0.204337
Chr22	50248472	50248661	Chr22_50248472_50248661_-	0	-	0.113958	0	0	0.264931
Chr22	50250905	50250973	Chr22_50250905_50250973_-	0	-	0.526761	0	0.300813	0
Chr22	50255694	50255809	Chr22_50255694_50255809_-	0	-	0.117872	0	0	0.183027
Chr22	50255881	50256084	Chr22_50255881_50256084_-	0	-	0.198565	0.295016	0.394366	0.300767
Chr22	50261296	50261384	Chr22_50261296_50261384_-	0	-	0.192661	0.26791	0.231153	0.309397
Chr22	50266305	50266539	Chr22_50266305_50266539_-	0	-	0.153846	0.340913	0	0.281749
Chr22	50266611	50266933	Chr22_50266611_50266933_-	0	-	0.165563	0	0.223421	0
Chr22	50505153	50505228	Chr22_50505153_50505228_-	0	-	0.135371	0.10027	0.131367	0
Chr22	50519320	50520964	Chr22_50519320_50520964_+	0	+	0.185298	0	0	0
Chr22	50571539	50572005	Chr22_50571539_50572005_-	0	-	0.113111	0	0	0
Chr22	50572122	50572202	Chr22_50572122_50572202_-	0	-	0.115385	0	0	0
Chr22	50580082	50580189	Chr22_50580082_50580189_-	0	-	0.134962	0	0	0
Chr22	50580271	50580357	Chr22_50580271_50580357_-	0	-	0.620349	0.598446	0.579473	0.630848
Chr22	50580660	50581419	Chr22_50580660_50581419_-	0	-	0.126956	0	0.15485	0
Chr22	50581553	50581748	Chr22_50581553_50581748_-	0	-	0.478587	0.344536	0.429043	0.300643
Chr22	50625464	50625578	Chr22_50625464_50625578_-	0	-	0.116028	0.119516	0	0.235669
Chr22	50627052	50627165	Chr22_50627052_50627165_-	0	-	0.375768	0.38959	0.547491	0
Chr3	3147703	3147905	Chr3_3147703_3147905_+	0	+	0.107722	0	0	0
Chr3	3151045	3152455	Chr3_3151045_3152455_-	0	-	0.177383	0	0	0
Chr3	9745155	9745572	Chr3_9745155_9745572_+	0	+	0.103301	0	0	0
Chr3	9745709	9745811	Chr3_9745709_9745811_+	0	+	0.516763	0.324111	0.284993	0.505479
Chr3	9757621	9757728	Chr3_9757621_9757728_-	0	-	0.243902	0	0	0
Chr3	9834907	9835093	Chr3_9834907_9835093_+	0	+	0.810026	0.887741	0.826715	0
Chr3	12584981	12585121	Chr3_12584981_12585121_-	0	-	0.114977	0	0	0
Chr3	12585253	12585680	Chr3_12585253_12585680_-	0	-	0.230415	0	0.154371	0
Chr3	12585799	12587590	Chr3_12585799_12587590_-	0	-	0.302905	0.20535	0	0.241515
Chr3	12813095	12813245	Chr3_12813095_12813245_+	0	+	0.153846	0	0	0
Chr3	14135232	14135806	Chr3_14135232_14135806_+	0	+	0.1443	0	0	0
Chr3	14146159	14147289	Chr3_14146159_14147289_-	0	-	0.165096	0	0	0
Chr3	15038137	15039121	Chr3_15038137_15039121_+	0	+	0.117919	0	0	0
Chr3	25736149	25737333	Chr3_25736149_25737333_-	0	-	0.101425	0	0	0
Chr3	25791997	25794091	Chr3_25791997_25794091_+	0	+	0.105263	0	0	0
Chr3	33392614	33393311	Chr3_33392614_33393311_-	0	-	0.153653	0	0	0
Chr3	33396280	33397044	Chr3_33396280_33397044_-	0	-	0.125709	0	0	0
Chr3	37980863	37981824	Chr3_37980863_37981824_+	0	+	0.851379	0	0	0
Chr3	38496530	38497628	Chr3_38496530_38497628_+	0	+	0.109139	0	0.111857	0.149192
Chr3	39100877	39101015	Chr3_39100877_39101015_-	0	-	0.13948	0.140857	0	0
Chr3	39391620	39391852	Chr3_39391620_39391852_+	0	+	0.110958	0.149606	0.1295	0
Chr3	42661632	42663011	Chr3_42661632_42663011_+	0	+	0.120084	0.154423	0.112279	0
Chr3	44826189	44826374	Chr3_44826189_44826374_+	0	+	0.152569	0	0	0
Chr3	45674411	45676921	Chr3_45674411_45676921_+	0	+	0.164581	0.136582	0	0
Chr3	45919065	45919412	Chr3_45919065_45919412_-	0	-	0.863166	0	0	0
Chr3	47004393	47004494	Chr3_47004393_47004494_+	0	+	0.333333	0.579014	0.524422	0
Chr3	47004590	47004971	Chr3_47004590_47004971_+	0	+	0.576838	0	0	0
Chr3	47007155	47007240	Chr3_47007155_47007240_+	0	+	0.318681	0.286184	0	0
Chr3	47417207	47417303	Chr3_47417207_47417303_-	0	-	0.1	0	0.160547	0.106164
Chr3	47849079	47849191	Chr3_47849079_47849191_+	0	+	0.110439	0	0.108791	0
Chr3	48415041	48415175	Chr3_48415041_48415175_-	0	-	0.124088	0	0	0
Chr3	48415347	48415582	Chr3_48415347_48415582_-	0	-	0.169371	0	0.142857	0
Chr3	48416451	48417910	Chr3_48416451_48417910_-	0	-	0.317675	0	0	0
Chr3	48420257	48420664	Chr3_48420257_48420664_-	0	-	0.119601	0.309553	0	0
Chr3	48630515	48630606	Chr3_48630515_48630606_-	0	-	0.203947	0	0	0
Chr3	48859201	48859554	Chr3_48859201_48859554_-	0	-	0.121365	0	0	0
Chr3	49002596	49004097	Chr3_49002596_49004097_+	0	+	0.16888	0	0	0
Chr3	49005046	49005776	Chr3_49005046_49005776_+	0	+	0.503464	0	0.378395	0.432568
Chr3	49005867	49006063	Chr3_49005867_49006063_+	0	+	0.163303	0	0	0
Chr3	49014116	49014209	Chr3_49014116_49014209_+	0	+	0.381266	0.317909	0.216382	0.292174
Chr3	49016086	49016157	Chr3_49016086_49016157_-	0	-	0.438393	0.371166	0.282511	0.320036
Chr3	49017356	49017433	Chr3_49017356_49017433_-	0	-	0.1778	0	0.222679	0
Chr3	49121362	49121432	Chr3_49121362_49121432_-	0	-	0.148936	0.103959	0	0
Chr3	49122370	49122703	Chr3_49122370_49122703_-	0	-	0.397478	0.328538	0.423723	0
Chr3	49274140	49276426	Chr3_49274140_49276426_-	0	-	0.117957	0	0	0
Chr3	49699772	49700226	Chr3_49699772_49700226_+	0	+	0.115443	0	0	0
Chr3	49700352	49700471	Chr3_49700352_49700471_+	0	+	0.107304	0	0	0
Chr3	49713825	49713909	Chr3_49713825_49713909_+	0	+	0.181818	0	0.175532	0
Chr3	49720653	49720799	Chr3_49720653_49720799_+	0	+	0.274539	0.40678	0.449508	0.223589
Chr3	49721105	49721184	Chr3_49721105_49721184_+	0	+	0.182441	0.385446	0.350834	0.300933
Chr3	49723114	49723253	Chr3_49723114_49723253_-	0	-	0.100712	0	0	0
Chr3	49840373	49840984	Chr3_49840373_49840984_-	0	-	0.187184	0	0	0.129021
Chr3	49842547	49843800	Chr3_49842547_49843800_-	0	-	0.255309	0	0	0.232616
Chr3	49909154	49909252	Chr3_49909154_49909252_-	0	-	0.4	0	0.266667	0
Chr3	49909400	49910118	Chr3_49909400_49910118_-	0	-	0.250824	0	0	0
Chr3	50103166	50104247	Chr3_50103166_50104247_+	0	+	0.132457	0	0	0
Chr3	50218948	50219880	Chr3_50218948_50219880_+	0	+	0.118348	0	0	0
Chr3	50288271	50288408	Chr3_50288271_50288408_-	0	-	0.229503	0.260752	0.202528	0
Chr3	50288937	50289254	Chr3_50288937_50289254_-	0	-	0.117454	0	0	0
Chr3	50290294	50290387	Chr3_50290294_50290387_-	0	-	0.178322	0.121418	0	0
Chr3	50348782	50348873	Chr3_50348782_50348873_-	0	-	0.114286	0	0	0
Chr3	50579939	50580115	Chr3_50579939_50580115_+	0	+	0.247232	0.158184	0	0
Chr3	50580229	50580380	Chr3_50580229_50580380_+	0	+	0.214286	0.252399	0	0
Chr3	51969605	51969942	Chr3_51969605_51969942_-	0	-	0.133216	0	0	0
Chr3	52249322	52249669	Chr3_52249322_52249669_+	0	+	0.125867	0	0	0
Chr3	52414048	52414495	Chr3_52414048_52414495_+	0	+	0.220016	0	0	0.309324
Chr3	52693329	52693407	Chr3_52693329_52693407_+	0	+	0.187344	0.172498	0.15514	0.178774
Chr3	52695035	52695189	Chr3_52695035_52695189_-	0	-	0.191672	0.208866	0.223388	0.252786
Chr3	52695302	52695420	Chr3_52695302_52695420_-	0	-	0.306667	0	0.337227	0
Chr3	52695587	52695927	Chr3_52695587_52695927_-	0	-	0.213365	0.291223	0.318017	0
Chr3	53819674	53820473	Chr3_53819674_53820473_-	0	-	0.101665	0	0	0
Chr3	55474629	55479313	Chr3_55474629_55479313_-	0	-	0.150901	0	0	0
Chr3	56566759	56566949	Chr3_56566759_56566949_+	0	+	0.107438	0	0	0
Chr3	56615272	56615921	Chr3_56615272_56615921_+	0	+	0.258783	0	0	0
Chr3	56623843	56624478	Chr3_56623843_56624478_-	0	-	0.129006	0	0	0
Chr3	66382398	66382981	Chr3_66382398_66382981_-	0	-	0.131282	0	0	0
Chr3	69044595	69047357	Chr3_69044595_69047357_-	0	-	0.148209	0	0	0
Chr3	69056063	69056182	Chr3_69056063_69056182_-	0	-	0.102453	0	0	0
Chr3	69056693	69056778	Chr3_69056693_69056778_-	0	-	0.186305	0	0.162688	0.160664
Chr3	75730618	75732059	Chr3_75730618_75732059_-	0	-	0.58396	0	0	0.617724
Chr3	97936908	97941147	Chr3_97936908_97941147_+	0	+	0.111247	0	0	0
Chr3	97942443	97943225	Chr3_97942443_97943225_+	0	+	0.330377	0	0.446593	0
Chr3	98516879	98517051	Chr3_98516879_98517051_-	0	-	0.10415	0	0.220319	0
Chr3	100345678	100346180	Chr3_100345678_100346180_+	0	+	0.256233	0.177886	0.15106	0
Chr3	101801989	101807052	Chr3_101801989_101807052_+	0	+	0.116594	0	0	0
Chr3	108648112	108648917	Chr3_108648112_108648917_+	0	+	0.252927	0	0	0
Chr3	108690903	108693359	Chr3_108690903_108693359_+	0	+	0.21524	0	0.142737	0
Chr3	113012811	113013271	Chr3_113012811_113013271_-	0	-	0.253112	0	0	0.32912
Chr3	119434882	119436790	Chr3_119434882_119436790_-	0	-	0.100168	0	0	0
Chr3	119436978	119437754	Chr3_119436978_119437754_-	0	-	0.27561	0.248403	0	0
Chr3	119491574	119492281	Chr3_119491574_119492281_+	0	+	0.154545	0	0	0
Chr3	121828972	121834390	Chr3_121828972_121834390_-	0	-	0.289739	0	0	0
Chr3	122556121	122558433	Chr3_122556121_122558433_-	0	-	0.108429	0	0	0
Chr3	123955965	123956045	Chr3_123955965_123956045_-	0	-	0.5625	0.34321	0.428571	0
Chr3	123956427	123956739	Chr3_123956427_123956739_-	0	-	0.544976	0.530112	0.554549	0.58416
Chr3	127012158	127014019	Chr3_127012158_127014019_+	0	+	0.157513	0	0	0
Chr3	127029536	127029873	Chr3_127029536_127029873_+	0	+	0.1312	0	0	0
Chr3	127677083	127677167	Chr3_127677083_127677167_+	0	+	0.371257	0	0.33177	0.192463
Chr3	129514554	129515487	Chr3_129514554_129515487_+	0	+	0.172382	0.167928	0	0
Chr3	129519732	129520175	Chr3_129519732_129520175_+	0	+	0.159616	0	0	0
Chr3	129556428	129556616	Chr3_129556428_129556616_-	0	-	0.182466	0.191837	0.131148	0.119171
Chr3	131382315	131383161	Chr3_131382315_131383161_+	0	+	0.105866	0	0	0
Chr3	132696813	132697259	Chr3_132696813_132697259_-	0	-	0.116602	0	0.132578	0
Chr3	138263821	138264130	Chr3_138263821_138264130_+	0	+	0.121774	0	0	0
Chr3	141586098	141586645	Chr3_141586098_141586645_+	0	+	0.237318	0	0	0
Chr3	142425332	142425428	Chr3_142425332_142425428_-	0	-	0.1	0	0	0
Chr3	154254824	154255330	Chr3_154254824_154255330_+	0	+	0.386973	0.435256	0	0
Chr3	160400965	160401914	Chr3_160400965_160401914_+	0	+	0.100199	0	0	0
Chr3	180608810	180609629	Chr3_180608810_180609629_+	0	+	0.704324	0.521531	0.341019	0.663294
Chr3	180962940	180963027	Chr3_180962940_180963027_+	0	+	0.221211	0.179564	0.192031	0.186986
Chr3	184143142	184143441	Chr3_184143142_184143441_+	0	+	0.202532	0.201467	0.102442	0.184147
Chr3	184164931	184165112	Chr3_184164931_184165112_+	0	+	0.167366	0.270913	0	0
Chr3	184189931	184190998	Chr3_184189931_184190998_+	0	+	0.144336	0	0	0
Chr3	184346800	184346934	Chr3_184346800_184346934_-	0	-	0.117276	0	0	0
Chr3	184347021	184352012	Chr3_184347021_184352012_-	0	-	0.105354	0	0	0
Chr3	184382530	184382633	Chr3_184382530_184382633_+	0	+	0.1	0	0	0
Chr3	186790064	186790141	Chr3_186790064_186790141_-	0	-	0.133318	0.239338	0.146277	0
Chr3	186790255	186790325	Chr3_186790255_186790325_-	0	-	0.280746	0.224356	0.245466	0.258093
Chr3	195868709	195870113	Chr3_195868709_195870113_-	0	-	0.149509	0	0	0.115591
Chr3	196239735	196241947	Chr3_196239735_196241947_-	0	-	0.105163	0	0	0
Chr3	196483891	196487398	Chr3_196483891_196487398_-	0	-	0.107625	0	0	0
Chr3	197008724	197008808	Chr3_197008724_197008808_-	0	-	0.4	0	0	0
Chr3	197024485	197026659	Chr3_197024485_197026659_-	0	-	0.108274	0	0	0
Chr4	523913	527038	Chr4_523913_527038_+	0	+	0.103741	0	0	0
Chr4	530745	533817	Chr4_530745_533817_+	0	+	0.269571	0.324613	0.161012	0.190329
Chr4	679033	679913	Chr4_679033_679913_+	0	+	0.139348	0	0	0
Chr4	960721	961048	Chr4_960721_961048_-	0	-	0.302677	0	0.242661	0
Chr4	961578	961687	Chr4_961578_961687_-	0	-	0.26494	0	0	0
Chr4	963290	965175	Chr4_963290_965175_-	0	-	0.203119	0	0.202527	0.57008
Chr4	1804520	1804823	Chr4_1804520_1804823_+	0	+	0.276722	0.207	0.303565	0
Chr4	2742520	2744386	Chr4_2742520_2744386_-	0	-	0.172524	0	0	0
Chr4	2824730	2825125	Chr4_2824730_2825125_+	0	+	0.364346	0.342018	0.413494	0
Chr4	2831679	2831922	Chr4_2831679_2831922_+	0	+	0.106583	0	0	0
Chr4	2930953	2931060	Chr4_2930953_2931060_-	0	-	0.395791	0.27736	0.528487	0.380574
Chr4	2931936	2932044	Chr4_2931936_2932044_-	0	-	0.126383	0.123947	0.188406	0.138659
Chr4	2932758	2933105	Chr4_2932758_2933105_-	0	-	0.219761	0.20647	0.233447	0.223623
Chr4	3121432	3122888	Chr4_3121432_3122888_+	0	+	0.106203	0	0	0
Chr4	6610990	6611085	Chr4_6610990_6611085_+	0	+	0.153846	0	0	0
Chr4	6620044	6621187	Chr4_6620044_6621187_+	0	+	0.160755	0	0	0
Chr4	6708643	6709230	Chr4_6708643_6709230_-	0	-	0.160071	0	0	0
Chr4	15687148	15688550	Chr4_15687148_15688550_+	0	+	0.363234	0	0	0
Chr4	25365166	25369028	Chr4_25365166_25369028_+	0	+	0.131342	0	0	0
Chr4	25414385	25414465	Chr4_25414385_25414465_+	0	+	0.227941	0	0.141292	0
Chr4	25415540	25416424	Chr4_25415540_25416424_+	0	+	0.13566	0.240506	0	0.101412
Chr4	26430053	26430418	Chr4_26430053_26430418_+	0	+	0.129535	0	0	0
Chr4	39273061	39274807	Chr4_39273061_39274807_+	0	+	0.210674	0	0	0
Chr4	39274958	39277019	Chr4_39274958_39277019_+	0	+	0.124283	0	0	0
Chr4	39465202	39465284	Chr4_39465202_39465284_+	0	+	0.130435	0.32	0.103586	0.107143
Chr4	55424643	55425375	Chr4_55424643_55425375_+	0	+	0.12205	0	0	0
Chr4	55965859	55969062	Chr4_55965859_55969062_+	0	+	0.101603	0	0	0
Chr4	55999417	55999490	Chr4_55999417_55999490_+	0	+	0.187291	0.221154	0	0.301965
Chr4	56353596	56354038	Chr4_56353596_56354038_-	0	-	0.149144	0.104823	0	0
Chr4	56354211	56354704	Chr4_56354211_56354704_-	0	-	0.107444	0	0	0
Chr4	56354811	56355181	Chr4_56354811_56355181_-	0	-	0.111111	0	0	0
Chr4	75799732	75800350	Chr4_75799732_75800350_+	0	+	0.102857	0	0	0
Chr4	77157506	77158532	Chr4_77157506_77158532_+	0	+	0.12529	0	0	0
Chr4	102636007	102639712	Chr4_102636007_102639712_-	0	-	0.128778	0	0	0
Chr4	106248306	106248920	Chr4_106248306_106248920_-	0	-	0.125	0	0	0
Chr4	112647127	112647198	Chr4_112647127_112647198_+	0	+	0.11283	0	0	0
Chr4	119410138	119410231	Chr4_119410138_119410231_-	0	-	0.147727	0.142857	0	0
Chr4	119502655	119504535	Chr4_119502655_119504535_-	0	-	0.3459	0	0	0
Chr4	119542634	119552549	Chr4_119542634_119552549_-	0	-	0.311571	0	0	0
Chr4	121899695	121902851	Chr4_121899695_121902851_-	0	-	0.107396	0	0	0
Chr4	127892514	127893284	Chr4_127892514_127893284_+	0	+	0.179985	0	0	0
Chr4	127920836	127921523	Chr4_127920836_127921523_-	0	-	0.397738	0	0.317171	0.310361
Chr4	128009191	128011672	Chr4_128009191_128011672_+	0	+	0.115337	0	0	0
Chr4	129109358	129109472	Chr4_129109358_129109472_+	0	+	0.112347	0	0	0
Chr4	169612143	169612221	Chr4_169612143_169612221_-	0	-	0.454545	0	0	0.430508
Chr4	170061993	170064718	Chr4_170061993_170064718_-	0	-	0.335916	0	0	0
Chr4	174304369	174308688	Chr4_174304369_174308688_+	0	+	0.112303	0	0	0
Chr4	183708574	183712599	Chr4_183708574_183712599_+	0	+	0.124401	0	0	0
Chr5	663572	665179	Chr5_663572_665179_+	0	+	0.617251	0	0	0
Chr5	1576309	1579276	Chr5_1576309_1579276_-	0	-	0.490659	0.251797	0.181251	0
Chr5	1879832	1880724	Chr5_1879832_1880724_-	0	-	0.190827	0.229058	0	0
Chr5	5465226	5466333	Chr5_5465226_5466333_+	0	+	0.117292	0	0	0
Chr5	10400842	10402058	Chr5_10400842_10402058_+	0	+	0.339814	0.284817	0.217944	0.284673
Chr5	14711310	14712873	Chr5_14711310_14712873_-	0	-	0.171704	0	0	0
Chr5	14712973	14713543	Chr5_14712973_14713543_-	0	-	0.265639	0.175295	0	0.133547
Chr5	36104106	36105067	Chr5_36104106_36105067_-	0	-	0.157745	0	0	0
Chr5	40771863	40775409	Chr5_40771863_40775409_-	0	-	0.113142	0	0	0
Chr5	41912183	41917015	Chr5_41912183_41917015_+	0	+	0.118904	0	0	0
Chr5	41925498	41927012	Chr5_41925498_41927012_+	0	+	0.237009	0.138226	0	0
Chr5	55270487	55270577	Chr5_55270487_55270577_-	0	-	0.142857	0	0	0
Chr5	56923833	56923914	Chr5_56923833_56923914_-	0	-	0.308257	0.126378	0.222222	0.161757
Chr5	62398739	62398819	Chr5_62398739_62398819_-	0	-	0.113749	0	0	0
Chr5	65660897	65662049	Chr5_65660897_65662049_+	0	+	0.108082	0	0	0
Chr5	73552852	73553405	Chr5_73552852_73553405_-	0	-	0.226539	0	0	0.108375
Chr5	79314851	79315999	Chr5_79314851_79315999_+	0	+	0.173414	0	0	0
Chr5	82275113	82275208	Chr5_82275113_82275208_-	0	-	0.958144	0	0	0
Chr5	83580162	83580306	Chr5_83580162_83580306_+	0	+	0.188474	0.285938	0.180812	0.469625
Chr5	87369900	87372117	Chr5_87369900_87372117_+	0	+	0.137351	0	0	0
Chr5	87372195	87374162	Chr5_87372195_87374162_+	0	+	0.115698	0	0	0
Chr5	87378538	87379734	Chr5_87378538_87379734_+	0	+	0.20264	0	0	0
Chr5	87379850	87380508	Chr5_87379850_87380508_+	0	+	0.284382	0	0.140293	0
Chr5	87383780	87385300	Chr5_87383780_87385300_+	0	+	0.152983	0	0	0
Chr5	88199150	88202961	Chr5_88199150_88202961_-	0	-	0.206815	0.158115	0.172525	0.145919
Chr5	95516586	95516671	Chr5_95516586_95516671_-	0	-	0.19901	0.11208	0	0
Chr5	95516750	95516915	Chr5_95516750_95516915_-	0	-	0.191155	0	0	0
Chr5	96776551	96780422	Chr5_96776551_96780422_-	0	-	0.133412	0	0	0
Chr5	113592178	113593302	Chr5_113592178_113593302_+	0	+	0.150476	0	0	0
Chr5	113593390	113593481	Chr5_113593390_113593481_+	0	+	0.417335	0.405275	0.377931	0.278903
Chr5	115832664	115837627	Chr5_115832664_115837627_-	0	-	0.104098	0	0	0
Chr5	132271908	132272024	Chr5_132271908_132272024_+	0	+	0.111111	0	0	0
Chr5	132378481	132384146	Chr5_132378481_132384146_+	0	+	0.141692	0	0.117395	0
Chr5	132385499	132387024	Chr5_132385499_132387024_+	0	+	0.120354	0	0	0
Chr5	135935439	135936593	Chr5_135935439_135936593_+	0	+	0.213675	0	0	0
Chr5	135936960	135937424	Chr5_135936960_135937424_+	0	+	0.365633	0	0	0
Chr5	137946311	137948954	Chr5_137946311_137948954_-	0	-	0.112927	0	0	0
Chr5	138166108	138166517	Chr5_138166108_138166517_-	0	-	0.104531	0	0	0
Chr5	138166727	138167933	Chr5_138166727_138167933_-	0	-	0.275335	0	0	0.298769
Chr5	138444535	138444753	Chr5_138444535_138444753_+	0	+	0.2125	0.106207	0	0
Chr5	139481342	139481477	Chr5_139481342_139481477_-	0	-	0.136948	0	0.223859	0
Chr5	139681447	139682862	Chr5_139681447_139682862_+	0	+	0.11685	0	0	0
Chr5	140562499	140562662	Chr5_140562499_140562662_-	0	-	0.404912	0.338109	0	0
Chr5	140642671	140642924	Chr5_140642671_140642924_+	0	+	0.24594	0	0	0
Chr5	140668334	140668414	Chr5_140668334_140668414_+	0	+	0.409962	0.283541	0.24878	0.209959
Chr5	140668990	140669078	Chr5_140668990_140669078_+	0	+	0.151694	0	0	0.354952
Chr5	141644438	141644572	Chr5_141644438_141644572_-	0	-	0.263158	0	0	0
Chr5	141644690	141644858	Chr5_141644690_141644858_-	0	-	0.244094	0	0	0
Chr5	141655932	141656063	Chr5_141655932_141656063_-	0	-	0.30791	0.3019	0	0
Chr5	146144537	146144623	Chr5_146144537_146144623_-	0	-	0.115428	0	0	0
Chr5	146480094	146482591	Chr5_146480094_146482591_+	0	+	0.183893	0	0	0
Chr5	148439792	148440423	Chr5_148439792_148440423_+	0	+	0.111934	0.123092	0	0
Chr5	154820472	154821259	Chr5_154820472_154821259_-	0	-	0.187282	0	0	0
Chr5	176368982	176371721	Chr5_176368982_176371721_+	0	+	0.109243	0	0	0
Chr5	176529644	176529730	Chr5_176529644_176529730_-	0	-	0.125	0	0.139079	0
Chr5	176531021	176531462	Chr5_176531021_176531462_-	0	-	0.132738	0	0.122735	0
Chr5	176652913	176654894	Chr5_176652913_176654894_+	0	+	0.105932	0	0	0
Chr5	177093331	177093405	Chr5_177093331_177093405_+	0	+	0.22963	0	0	0.307692
Chr5	177097397	177097526	Chr5_177097397_177097526_+	0	+	0.243243	0	0	0.159199
Chr5	177302178	177302396	Chr5_177302178_177302396_-	0	-	0.416549	0.507963	0.403691	0
Chr5	177310540	177310667	Chr5_177310540_177310667_-	0	-	0.428323	0.307564	0.157451	0.407148
Chr5	177371396	177371474	Chr5_177371396_177371474_+	0	+	0.151515	0.182652	0	0
Chr5	177402459	177402549	Chr5_177402459_177402549_-	0	-	0.1	0	0.205517	0
Chr5	178142728	178142851	Chr5_178142728_178142851_+	0	+	0.231608	0	0.119293	0
Chr5	178143727	178143941	Chr5_178143727_178143941_+	0	+	0.19628	0	0	0
Chr5	178214885	178215275	Chr5_178214885_178215275_-	0	-	0.166838	0	0	0
Chr5	178215430	178222354	Chr5_178215430_178222354_-	0	-	0.187086	0	0	0
Chr5	180313964	180316340	Chr5_180313964_180316340_-	0	-	0.191158	0	0	0
Chr5	181230839	181232658	Chr5_181230839_181232658_+	0	+	0.194743	0	0	0
Chr5	181233435	181233635	Chr5_181233435_181233635_+	0	+	0.235886	0.361859	0	0
Chr6	2779492	2783405	Chr6_2779492_2783405_+	0	+	0.11055	0	0	0
Chr6	2838686	2840418	Chr6_2838686_2840418_-	0	-	0.122985	0	0	0
Chr6	3083313	3085258	Chr6_3083313_3085258_+	0	+	0.180446	0	0	0
Chr6	10400589	10402491	Chr6_10400589_10402491_-	0	-	0.1703	0	0	0.208333
Chr6	10927367	10928402	Chr6_10927367_10928402_+	0	+	0.14887	0	0	0
Chr6	25972099	25973053	Chr6_25972099_25973053_+	0	+	0.132032	0	0	0
Chr6	26373296	26373386	Chr6_26373296_26373386_+	0	+	0.223966	0	0	0.148289
Chr6	26407952	26409532	Chr6_26407952_26409532_+	0	+	0.136473	0	0	0.117092
Chr6	26409914	26410005	Chr6_26409914_26410005_+	0	+	0.223529	0	0	0.315789
Chr6	28151936	28152260	Chr6_28151936_28152260_+	0	+	0.116071	0	0	0
Chr6	28380871	28382190	Chr6_28380871_28382190_-	0	-	0.128631	0	0	0
Chr6	29607218	29608600	Chr6_29607218_29608600_-	0	-	0.226738	0	0	0
Chr6	29630643	29631395	Chr6_29630643_29631395_-	0	-	0.501076	0	0	0.413963
Chr6	29723527	29723657	Chr6_29723527_29723657_+	0	+	0.106243	0	0	0
Chr6	30645974	30646066	Chr6_30645974_30646066_+	0	+	0.553219	0.194444	0	0.347722
Chr6	30649959	30650993	Chr6_30649959_30650993_+	0	+	0.114597	0	0	0
Chr6	30651082	30651265	Chr6_30651082_30651265_+	0	+	0.140438	0	0	0
Chr6	30740798	30741189	Chr6_30740798_30741189_-	0	-	0.131007	0	0	0
Chr6	30741333	30741613	Chr6_30741333_30741613_-	0	-	0.176401	0	0.114709	0
Chr6	30917806	30918826	Chr6_30917806_30918826_+	0	+	0.191859	0	0.136917	0
Chr6	30924560	30925273	Chr6_30924560_30925273_+	0	+	0.105263	0	0	0
Chr6	31410797	31411071	Chr6_31410797_31411071_+	0	+	0.116111	0	0	0
Chr6	31687544	31687641	Chr6_31687544_31687641_-	0	-	0.10459	0	0	0
Chr6	31688103	31688248	Chr6_31688103_31688248_-	0	-	0.192427	0	0.171048	0
Chr6	31688786	31689014	Chr6_31688786_31689014_-	0	-	0.118143	0	0	0
Chr6	31690602	31691578	Chr6_31690602_31691578_-	0	-	0.100498	0	0	0
Chr6	31747432	31753300	Chr6_31747432_31753300_+	0	+	0.197465	0.277254	0.214865	0
Chr6	31753439	31753566	Chr6_31753439_31753566_+	0	+	0.219107	0	0.129032	0.12451
Chr6	31759177	31759424	Chr6_31759177_31759424_+	0	+	0.517766	0.348442	0.521781	0
Chr6	31759512	31759785	Chr6_31759512_31759785_+	0	+	0.292613	0	0	0
Chr6	31760216	31760689	Chr6_31760216_31760689_+	0	+	0.119906	0	0	0
Chr6	31761955	31762111	Chr6_31761955_31762111_+	0	+	0.282869	0.364959	0.303644	0.313824
Chr6	31764355	31764435	Chr6_31764355_31764435_+	0	+	0.459807	0.399694	0.433904	0
Chr6	31884559	31884644	Chr6_31884559_31884644_-	0	-	0.176991	0.147486	0.207268	0.139535
Chr6	31953831	31954079	Chr6_31953831_31954079_-	0	-	0.121114	0	0	0
Chr6	31961386	31961546	Chr6_31961386_31961546_+	0	+	0.111111	0	0	0
Chr6	31969420	31969514	Chr6_31969420_31969514_+	0	+	0.461944	0.426644	0.441338	0
Chr6	31970024	31970108	Chr6_31970024_31970108_-	0	-	0.1	0	0	0.119217
Chr6	32166620	32166700	Chr6_32166620_32166700_+	0	+	0.294118	0	0.336766	0
Chr6	32167257	32167349	Chr6_32167257_32167349_+	0	+	0.142857	0	0	0
Chr6	32167429	32167502	Chr6_32167429_32167502_+	0	+	0.402214	0.543099	0.681885	0.522124
Chr6	32832824	32835153	Chr6_32832824_32835153_-	0	-	0.193693	0	0.100943	0
Chr6	33195702	33195906	Chr6_33195702_33195906_-	0	-	0.305395	0.206364	0.343917	0
Chr6	33199416	33200241	Chr6_33199416_33200241_-	0	-	0.135812	0	0	0.111084
Chr6	33204720	33204901	Chr6_33204720_33204901_+	0	+	0.30303	0	0	0
Chr6	33205539	33205639	Chr6_33205539_33205639_+	0	+	0.206299	0	0.23506	0
Chr6	33205912	33206133	Chr6_33205912_33206133_+	0	+	0.106517	0	0.149104	0
Chr6	33264497	33264781	Chr6_33264497_33264781_-	0	-	0.328306	0.214581	0.210904	0.26274
Chr6	33293524	33293603	Chr6_33293524_33293603_-	0	-	0.21875	0.246919	0.311933	0.245283
Chr6	33293699	33293794	Chr6_33293699_33293794_-	0	-	0.175084	0.150485	0	0
Chr6	33304217	33304296	Chr6_33304217_33304296_-	0	-	0.214286	0.213614	0	0
Chr6	33416660	33416748	Chr6_33416660_33416748_-	0	-	0.980269	0	0	0
Chr6	33684465	33684597	Chr6_33684465_33684597_+	0	+	0.103586	0	0	0
Chr6	33691928	33692727	Chr6_33691928_33692727_+	0	+	0.21018	0	0	0.229031
Chr6	33786774	33788380	Chr6_33786774_33788380_-	0	-	0.363135	0.221691	0	0
Chr6	34236963	34237203	Chr6_34236963_34237203_+	0	+	0.151886	0	0	0
Chr6	34247149	34247466	Chr6_34247149_34247466_-	0	-	0.130463	0	0	0
Chr6	35320974	35321186	Chr6_35320974_35321186_+	0	+	0.139313	0	0	0
Chr6	35460618	35462788	Chr6_35460618_35462788_+	0	+	0.155399	0	0	0
Chr6	35478324	35478433	Chr6_35478324_35478433_-	0	-	0.115385	0	0	0
Chr6	36498486	36499872	Chr6_36498486_36499872_-	0	-	0.169262	0.212423	0	0
Chr6	39878588	39879177	Chr6_39878588_39879177_+	0	+	0.115902	0	0	0
Chr6	39896980	39897174	Chr6_39896980_39897174_+	0	+	0.12253	0.151675	0	0
Chr6	41687809	41687907	Chr6_41687809_41687907_-	0	-	0.1	0	0	0
Chr6	42606651	42612170	Chr6_42606651_42612170_+	0	+	0.108305	0	0	0
Chr6	42965789	42966043	Chr6_42965789_42966043_-	0	-	0.424282	0.445283	0	0
Chr6	42966105	42966241	Chr6_42966105_42966241_-	0	-	0.484511	0.44894	0	0.363636
Chr6	42967563	42968289	Chr6_42967563_42968289_-	0	-	0.127768	0	0.271296	0.128065
Chr6	42968498	42968873	Chr6_42968498_42968873_-	0	-	0.212968	0.149842	0.266376	0
Chr6	42975038	42978268	Chr6_42975038_42978268_-	0	-	0.117753	0	0	0
Chr6	43038692	43038841	Chr6_43038692_43038841_-	0	-	0.345129	0.256085	0.334112	0.344514
Chr6	43043630	43044751	Chr6_43043630_43044751_-	0	-	0.114938	0	0	0
Chr6	43045402	43045586	Chr6_43045402_43045586_-	0	-	0.114391	0	0	0
Chr6	43047107	43048147	Chr6_43047107_43048147_-	0	-	0.102902	0.109514	0	0
Chr6	43061593	43062916	Chr6_43061593_43062916_+	0	+	0.105504	0	0	0
Chr6	43142299	43143416	Chr6_43142299_43143416_+	0	+	0.206316	0	0	0
Chr6	43203204	43203416	Chr6_43203204_43203416_+	0	+	0.1	0	0	0
Chr6	43204539	43204747	Chr6_43204539_43204747_+	0	+	0.1381	0	0	0
Chr6	43221321	43221684	Chr6_43221321_43221684_+	0	+	0.134208	0	0	0.111065
Chr6	43307896	43308314	Chr6_43307896_43308314_-	0	-	0.145555	0.267701	0.124867	0.129864
Chr6	43342211	43342675	Chr6_43342211_43342675_-	0	-	0.193352	0.215324	0	0
Chr6	43443159	43443932	Chr6_43443159_43443932_+	0	+	0.273307	0.240435	0	0
Chr6	43445314	43445598	Chr6_43445314_43445598_+	0	+	0.263158	0.178423	0	0
Chr6	43447408	43447683	Chr6_43447408_43447683_+	0	+	0.149293	0	0.35066	0.354524
Chr6	43449026	43449106	Chr6_43449026_43449106_+	0	+	0.125	0.157472	0	0
Chr6	43520774	43520931	Chr6_43520774_43520931_+	0	+	0.130221	0	0	0
Chr6	43624729	43624887	Chr6_43624729_43624887_-	0	-	0.107203	0.127662	0.137202	0
Chr6	43625062	43625362	Chr6_43625062_43625362_-	0	-	0.281612	0.251367	0.259133	0.219871
Chr6	44230046	44230346	Chr6_44230046_44230346_+	0	+	0.121931	0	0.102737	0
Chr6	44304817	44305053	Chr6_44304817_44305053_-	0	-	0.1	0	0	0
Chr6	52505742	52506031	Chr6_52505742_52506031_-	0	-	0.111111	0	0.169118	0
Chr6	53092824	53093465	Chr6_53092824_53093465_+	0	+	0.1904	0.201345	0.172988	0
Chr6	70861749	70861829	Chr6_70861749_70861829_-	0	-	0.741538	0.618677	0.79562	0
Chr6	87508596	87509040	Chr6_87508596_87509040_+	0	+	0.179407	0.265181	0.117647	0
Chr6	89146609	89149264	Chr6_89146609_89149264_+	0	+	0.108556	0	0	0
Chr6	89624057	89624538	Chr6_89624057_89624538_+	0	+	0.1158	0	0	0
Chr6	89719030	89719135	Chr6_89719030_89719135_-	0	-	0.1	0	0	0
Chr6	97254733	97263334	Chr6_97254733_97263334_-	0	-	0.115292	0	0	0
Chr6	98874441	98875414	Chr6_98874441_98875414_-	0	-	0.221197	0	0	0
Chr6	99465136	99466671	Chr6_99465136_99466671_-	0	-	0.1752	0	0	0
Chr6	99466763	99468536	Chr6_99466763_99468536_-	0	-	0.173786	0	0	0
Chr6	109444339	109444724	Chr6_109444339_109444724_-	0	-	0.184225	0	0	0
Chr6	109444798	109444895	Chr6_109444798_109444895_-	0	-	0.198856	0	0.117391	0
Chr6	111572983	111575642	Chr6_111572983_111575642_-	0	-	0.135852	0	0	0
Chr6	112072076	112072757	Chr6_112072076_112072757_-	0	-	0.101304	0	0	0
Chr6	116431193	116433342	Chr6_116431193_116433342_+	0	+	0.137214	0	0	0.130357
Chr6	116729741	116732135	Chr6_116729741_116732135_+	0	+	0.110162	0	0	0
Chr6	117545597	117547906	Chr6_117545597_117547906_+	0	+	0.166241	0	0	0
Chr6	149968870	149969084	Chr6_149968870_149969084_+	0	+	0.133333	0	0	0
Chr6	155248179	155249850	Chr6_155248179_155249850_+	0	+	0.435484	0	0	0
Chr6	159679298	159682473	Chr6_159679298_159682473_-	0	-	0.764075	0	0	0.702052
Chr6	167946901	167947852	Chr6_167946901_167947852_+	0	+	0.121064	0	0	0
Chr6	169705321	169705615	Chr6_169705321_169705615_-	0	-	0.262948	0.302135	0	0.181075
Chr6	170282879	170282987	Chr6_170282879_170282987_-	0	-	0.166667	0	0	0
Chr6	170285135	170285253	Chr6_170285135_170285253_-	0	-	0.333333	0.158866	0.387674	0.10421
Chr6	170285423	170285568	Chr6_170285423_170285568_-	0	-	0.318398	0.250592	0	0
Chr7	848615	849519	Chr7_848615_849519_+	0	+	0.24985	0.215922	0	0.156245
Chr7	850033	851383	Chr7_850033_851383_+	0	+	0.241189	0	0	0
Chr7	4790887	4791114	Chr7_4790887_4791114_+	0	+	0.169451	0	0	0
Chr7	4799483	4799629	Chr7_4799483_4799629_-	0	-	0.166667	0.209125	0.181818	0
Chr7	6412883	6412965	Chr7_6412883_6412965_-	0	-	0.115914	0	0	0
Chr7	6642764	6642963	Chr7_6642764_6642963_+	0	+	0.358927	0	0	0
Chr7	23195915	23196679	Chr7_23195915_23196679_+	0	+	0.128076	0	0	0
Chr7	24702833	24706183	Chr7_24702833_24706183_-	0	-	0.135799	0	0	0
Chr7	26190460	26190992	Chr7_26190460_26190992_-	0	-	0.218568	0	0	0
Chr7	26192338	26192494	Chr7_26192338_26192494_-	0	-	0.136902	0.121825	0	0
Chr7	27163841	27164877	Chr7_27163841_27164877_-	0	-	0.151034	0	0	0
Chr7	32580272	32580801	Chr7_32580272_32580801_+	0	+	0.210128	0	0	0
Chr7	35634429	35635134	Chr7_35634429_35635134_-	0	-	0.134798	0	0	0
Chr7	35694627	35694800	Chr7_35694627_35694800_-	0	-	0.470774	0	0.358852	0.414982
Chr7	43619723	43623571	Chr7_43619723_43623571_+	0	+	0.16696	0.155257	0	0.11611
Chr7	44756539	44756946	Chr7_44756539_44756946_+	0	+	0.130016	0.136862	0	0
Chr7	45101614	45101824	Chr7_45101614_45101824_-	0	-	0.185928	0.146585	0.123298	0
Chr7	65763020	65763280	Chr7_65763020_65763280_+	0	+	0.40856	0	0	0
Chr7	66805396	66808885	Chr7_66805396_66808885_+	0	+	0.108363	0	0	0
Chr7	72948597	72948667	Chr7_72948597_72948667_-	0	-	0.878296	0	0	0
Chr7	73303529	73303599	Chr7_73303529_73303599_-	0	-	0.133333	0.202834	0.210793	0
Chr7	73574122	73574382	Chr7_73574122_73574382_-	0	-	0.109131	0	0	0
Chr7	73593983	73594273	Chr7_73593983_73594273_-	0	-	0.344646	0	0.124598	0
Chr7	73700931	73702844	Chr7_73700931_73702844_-	0	-	0.163112	0	0	0
Chr7	73704256	73704349	Chr7_73704256_73704349_-	0	-	0.272727	0.258401	0.153846	0.176471
Chr7	73736691	73736928	Chr7_73736691_73736928_-	0	-	0.141046	0.183595	0	0.254098
Chr7	75987602	75987717	Chr7_75987602_75987717_-	0	-	0.129032	0.234705	0	0
Chr7	77311449	77311840	Chr7_77311449_77311840_-	0	-	0.105739	0	0	0
Chr7	87382181	87382412	Chr7_87382181_87382412_+	0	+	0.12459	0	0.148325	0
Chr7	92345066	92350949	Chr7_92345066_92350949_+	0	+	0.107448	0	0	0
Chr7	92493129	92494292	Chr7_92493129_92494292_-	0	-	0.305516	0.211789	0	0.222753
Chr7	94551478	94552349	Chr7_94551478_94552349_+	0	+	0.105512	0	0	0.133562
Chr7	94554575	94555491	Chr7_94554575_94555491_+	0	+	0.105767	0	0.137069	0
Chr7	98217503	98217691	Chr7_98217503_98217691_-	0	-	0.145401	0	0.111111	0
Chr7	98244693	98244884	Chr7_98244693_98244884_-	0	-	0.404429	0	0	0
Chr7	100075261	100075541	Chr7_100075261_100075541_-	0	-	0.141063	0	0.134741	0.114327
Chr7	100106003	100106240	Chr7_100106003_100106240_+	0	+	0.196877	0.199323	0	0
Chr7	100122385	100122480	Chr7_100122385_100122480_+	0	+	0.170732	0	0	0.136364
Chr7	100435533	100435630	Chr7_100435533_100435630_-	0	-	0.375892	0	0	0
Chr7	100436064	100436140	Chr7_100436064_100436140_-	0	-	0.412587	0.329218	0.331855	0.204698
Chr7	100576777	100576901	Chr7_100576777_100576901_-	0	-	0.261637	0.209702	0.328021	0.394124
Chr7	100578258	100578398	Chr7_100578258_100578398_-	0	-	0.142857	0.226606	0.334045	0.212121
Chr7	100681993	100682071	Chr7_100681993_100682071_-	0	-	0.156742	0	0.24878	0.280129
Chr7	100683230	100683303	Chr7_100683230_100683303_-	0	-	0.200348	0	0.139336	0.116279
Chr7	100684157	100684236	Chr7_100684157_100684236_-	0	-	0.13617	0	0	0
Chr7	100686079	100686179	Chr7_100686079_100686179_-	0	-	0.185185	0	0	0
Chr7	100854754	100855705	Chr7_100854754_100855705_+	0	+	0.133997	0	0	0.307531
Chr7	100855837	100856867	Chr7_100855837_100856867_+	0	+	0.230189	0	0	0
Chr7	100888383	100888473	Chr7_100888383_100888473_+	0	+	0.155801	0.156105	0.126995	0.166112
Chr7	101232515	101232603	Chr7_101232515_101232603_-	0	-	0.136364	0	0	0
Chr7	101232720	101232832	Chr7_101232720_101232832_-	0	-	0.366379	0.209729	0.435768	0.171053
Chr7	101234442	101237364	Chr7_101234442_101237364_-	0	-	0.129503	0	0	0
Chr7	103322632	103322702	Chr7_103322632_103322702_-	0	-	0.191638	0	0.247387	0.311094
Chr7	108002971	108003110	Chr7_108002971_108003110_-	0	-	0.166667	0	0	0
Chr7	111741214	111741539	Chr7_111741214_111741539_-	0	-	0.1	0	0	0
Chr7	112459018	112461865	Chr7_112459018_112461865_+	0	+	0.227529	0.165553	0	0.115014
Chr7	117711782	117718017	Chr7_117711782_117718017_-	0	-	0.107622	0	0	0
Chr7	128324694	128325817	Chr7_128324694_128325817_-	0	-	0.121807	0	0	0
Chr7	129456642	129458214	Chr7_129456642_129458214_+	0	+	0.292744	0.273852	0	0.421014
Chr7	135187169	135188432	Chr7_135187169_135188432_-	0	-	0.12666	0.190618	0	0
Chr7	135196337	135197992	Chr7_135196337_135197992_-	0	-	0.108552	0	0	0
Chr7	141665054	141665186	Chr7_141665054_141665186_-	0	-	0.223602	0	0	0
Chr7	143265092	143265260	Chr7_143265092_143265260_+	0	+	0.166043	0.236952	0.297436	0
Chr7	149551826	149552800	Chr7_149551826_149552800_-	0	-	0.139	0	0	0
Chr7	149728675	149729187	Chr7_149728675_149729187_+	0	+	0.146599	0	0	0
Chr7	151010807	151010898	Chr7_151010807_151010898_+	0	+	0.5	0	0	0
Chr7	151040301	151040497	Chr7_151040301_151040497_+	0	+	0.208922	0	0	0
Chr7	151077027	151077100	Chr7_151077027_151077100_-	0	-	0.296716	0.340022	0.385923	0.289681
Chr7	151077236	151077309	Chr7_151077236_151077309_-	0	-	0.372583	0.468405	0.38125	0.398197
Chr7	151077780	151077878	Chr7_151077780_151077878_-	0	-	0.226419	0.248627	0.313901	0.12805
Chr7	151240247	151240424	Chr7_151240247_151240424_-	0	-	0.203973	0	0.22466	0.265438
Chr7	156966402	156966960	Chr7_156966402_156966960_+	0	+	0.109483	0	0.110961	0
Chr7	158655258	158655338	Chr7_158655258_158655338_-	0	-	0.113002	0.125888	0	0
Chr7	158902595	158905988	Chr7_158902595_158905988_+	0	+	0.1025	0	0	0
Chr8	22100972	22101439	Chr8_22100972_22101439_+	0	+	0.245702	0	0	0.164331
Chr8	22101530	22101707	Chr8_22101530_22101707_+	0	+	0.14566	0	0	0
Chr8	22101851	22102174	Chr8_22101851_22102174_+	0	+	0.23461	0	0	0
Chr8	22102628	22102792	Chr8_22102628_22102792_+	0	+	0.1	0	0	0
Chr8	22138793	22138925	Chr8_22138793_22138925_-	0	-	0.151644	0	0	0
Chr8	22566713	22566821	Chr8_22566713_22566821_+	0	+	0.411765	0.231174	0.485646	0.354162
Chr8	22602080	22602199	Chr8_22602080_22602199_+	0	+	0.153846	0.564399	0	0.153846
Chr8	23004626	23005371	Chr8_23004626_23005371_+	0	+	0.119591	0.104704	0	0
Chr8	23007746	23007992	Chr8_23007746_23007992_+	0	+	0.119266	0	0.286449	0.124088
Chr8	23028441	23028528	Chr8_23028441_23028528_-	0	-	0.695481	0.636482	0.698804	0.439759
Chr8	23199917	23200504	Chr8_23199917_23200504_-	0	-	0.168733	0	0	0
[truncated: 3,909 more rows]
