# Supplementary material for: Systematic identification and characterization of exon–intron circRNAs
Source: Genome Res. 2024 Mar;34(3):376–93. doi: 10.1101/gr.278590.123 (PMC11067877; doi:10.1101/gr.278590.123)
Supplement: Supplement 4 [file Supplemental_Table_S4.xlsx]

## Sheet: Table S4A. Sequence_feature
Supplemental Table S4A: List of sequence features used for deep learning analysis of introns
feature name	feature description
intron_pos	intron position
LogLen.E1	Length of E1 (Log10 based)
LogLen.I	Length of intron
LogLen.E2	Length of E2 (Log10 based)
LogLenRatio.E1_I	Relative length E1/intron
LogLenRatio.E2_I	Relative length E2/intron
FrameShift.I	Whether intron introduces a frame shift (binary: 0 or 1)
Translatable.E1	Translatability of E1
Translatable.E2	Translatability of E2
Translatable.E1E2	Translatability of E1E2
Translatable.E1IE2	Translatability of E1+intron+E2
Translatable.I	Translatability of intron
E1.GC	E1 GC%
I_5p.GC	GC% of first 100nt of 5'-intron
I_3p.GC	GC% of the last 100nt of 3'-intron
E2.GC	E2 GC%
Intron.GC	Intron GC%
5_ss.GC	5'-ss GC%
3_ss.GC	3'-ss GC%
ShortSeq.A.E1	A count in E1
ShortSeq.A.E2	A count in E2
ShortSeq.A.I_3p	A count in 3'-intron
ShortSeq.A.I_5p	A count in 5'-intron
ShortSeq.C.E1	C count in E1
ShortSeq.C.E2	C count in E2
ShortSeq.C.I_3p	C count in 3'-intron
ShortSeq.C.I_5p	C count in 5'-intron
ShortSeq.G.E1	G count in E1
ShortSeq.G.E2	G count in E2
ShortSeq.G.I_3p	G count in 3'-intron
ShortSeq.G.I_5p	G count in 5'-intron
ShortSeq.T.E1	T count in E1
ShortSeq.T.E2	T count in E2
ShortSeq.T.I_3p	T count in 3'-intron
ShortSeq.T.I_5p	T count in 5'-intron
ShortSeq.AA.E1	AA count in E1
ShortSeq.AA.E2	AA count in E2
ShortSeq.AA.I_3p	AA count in 3'-intron
ShortSeq.AA.I_5p	AA count in 5'-intron
ShortSeq.AC.E1	AC count in E1
ShortSeq.AC.E2	AC count in E2
ShortSeq.AC.I_3p	AC count in 3'-intron
ShortSeq.AC.I_5p	AC count in 5'-intron
ShortSeq.AG.E1	AG count in E1
ShortSeq.AG.E2	AG count in E2
ShortSeq.AG.I_3p	AG count in 3'-intron
ShortSeq.AG.I_5p	AG count in 5'-intron
ShortSeq.AT.E1	AT count in E1
ShortSeq.AT.E2	AT count in E2
ShortSeq.AT.I_3p	AT count in 3'-intron
ShortSeq.AT.I_5p	AT count in 5'-intron
ShortSeq.CA.E1	CA count in E1
ShortSeq.CA.E2	CA count in E2
ShortSeq.CA.I_3p	CA count in 3'-intron
ShortSeq.CA.I_5p	CA count in 5'-intron
ShortSeq.CC.E1	CC count in E1
ShortSeq.CC.E2	CC count in E2
ShortSeq.CC.I_3p	CC count in 3'-intron
ShortSeq.CC.I_5p	CC count in 5'-intron
ShortSeq.CG.E1	CG count in E1
ShortSeq.CG.E2	CG count in E2
ShortSeq.CG.I_3p	CG count in 3'-intron
ShortSeq.CG.I_5p	CG count in 5'-intron
ShortSeq.CT.E1	CT count in E1
ShortSeq.CT.E2	CT count in E2
ShortSeq.CT.I_3p	CT count in 3'-intron
ShortSeq.CT.I_5p	CT count in 5'-intron
ShortSeq.GA.E1	GA count in E1
ShortSeq.GA.E2	GA count in E2
ShortSeq.GA.I_3p	GA count in 3'-intron
ShortSeq.GA.I_5p	GA count in 5'-intron
ShortSeq.GC.E1	GC count in E1
ShortSeq.GC.E2	GC count in E2
ShortSeq.GC.I_3p	GC count in 3'-intron
ShortSeq.GC.I_5p	GC count in 5'-intron
ShortSeq.GG.E1	GG count in E1
ShortSeq.GG.E2	GG count in E2
ShortSeq.GG.I_3p	GG count in 3'-intron
ShortSeq.GG.I_5p	GG count in 5'-intron
ShortSeq.GT.E1	GT count in E1
ShortSeq.GT.E2	GT count in E2
ShortSeq.GT.I_3p	GT count in 3'-intron
ShortSeq.GT.I_5p	GT count in 5'-intron
ShortSeq.TA.E1	TA count in E1
ShortSeq.TA.E2	TA count in E2
ShortSeq.TA.I_3p	TA count in 3'-intron
ShortSeq.TA.I_5p	TA count in 5'-intron
ShortSeq.TC.E1	TC count in E1
ShortSeq.TC.E2	TC count in E2
ShortSeq.TC.I_3p	TC count in 3'-intron
ShortSeq.TC.I_5p	TC count in 5'-intron
ShortSeq.TG.E1	TG count in E1
ShortSeq.TG.E2	TG count in E2
ShortSeq.TG.I_3p	TG count in 3'-intron
ShortSeq.TG.I_5p	TG count in 5'-intron
ShortSeq.TT.E1	TT count in E1
ShortSeq.TT.E2	TT count in E2
ShortSeq.TT.I_3p	TT count in 3'-intron
ShortSeq.TT.I_5p	TT count in 5'-intron
ShortSeq.AAA.E1	AAA count in E1
ShortSeq.AAA.E2	AAA count in E2
ShortSeq.AAA.I_3p	AAA count in 3'-intron
ShortSeq.AAA.I_5p	AAA count in 5'-intron
ShortSeq.AAC.E1	AAC count in E1
ShortSeq.AAC.E2	AAC count in E2
ShortSeq.AAC.I_3p	AAC count in 3'-intron
ShortSeq.AAC.I_5p	AAC count in 5'-intron
ShortSeq.AAG.E1	AAG count in E1
ShortSeq.AAG.E2	AAG count in E2
ShortSeq.AAG.I_3p	AAG count in 3'-intron
ShortSeq.AAG.I_5p	AAG count in 5'-intron
ShortSeq.AAT.E1	AAT count in E1
ShortSeq.AAT.E2	AAT count in E2
ShortSeq.AAT.I_3p	AAT count in 3'-intron
ShortSeq.AAT.I_5p	AAT count in 5'-intron
ShortSeq.ACA.E1	ACA count in E1
ShortSeq.ACA.E2	ACA count in E2
ShortSeq.ACA.I_3p	ACA count in 3'-intron
ShortSeq.ACA.I_5p	ACA count in 5'-intron
ShortSeq.ACC.E1	ACC count in E1
ShortSeq.ACC.E2	ACC count in E2
ShortSeq.ACC.I_3p	ACC count in 3'-intron
ShortSeq.ACC.I_5p	ACC count in 5'-intron
ShortSeq.ACG.E1	ACG count in E1
ShortSeq.ACG.E2	ACG count in E2
ShortSeq.ACG.I_3p	ACG count in 3'-intron
ShortSeq.ACG.I_5p	ACG count in 5'-intron
ShortSeq.ACT.E1	ACT count in E1
ShortSeq.ACT.E2	ACT count in E2
ShortSeq.ACT.I_3p	ACT count in 3'-intron
ShortSeq.ACT.I_5p	ACT count in 5'-intron
ShortSeq.AGA.E1	AGA count in E1
ShortSeq.AGA.E2	AGA count in E2
ShortSeq.AGA.I_3p	AGA count in 3'-intron
ShortSeq.AGA.I_5p	AGA count in 5'-intron
ShortSeq.AGC.E1	AGC count in E1
ShortSeq.AGC.E2	AGC count in E2
ShortSeq.AGC.I_3p	AGC count in 3'-intron
ShortSeq.AGC.I_5p	AGC count in 5'-intron
ShortSeq.AGG.E1	AGG count in E1
ShortSeq.AGG.E2	AGG count in E2
ShortSeq.AGG.I_3p	AGG count in 3'-intron
ShortSeq.AGG.I_5p	AGG count in 5'-intron
ShortSeq.AGT.E1	AGT count in E1
ShortSeq.AGT.E2	AGT count in E2
ShortSeq.AGT.I_3p	AGT count in 3'-intron
ShortSeq.AGT.I_5p	AGT count in 5'-intron
ShortSeq.ATA.E1	ATA count in E1
ShortSeq.ATA.E2	ATA count in E2
ShortSeq.ATA.I_3p	ATA count in 3'-intron
ShortSeq.ATA.I_5p	ATA count in 5'-intron
ShortSeq.ATC.E1	ATC count in E1
ShortSeq.ATC.E2	ATC count in E2
ShortSeq.ATC.I_3p	ATC count in 3'-intron
ShortSeq.ATC.I_5p	ATC count in 5'-intron
ShortSeq.ATG.E1	ATG count in E1
ShortSeq.ATG.E2	ATG count in E2
ShortSeq.ATG.I_3p	ATG count in 3'-intron
ShortSeq.ATG.I_5p	ATG count in 5'-intron
ShortSeq.ATT.E1	ATT count in E1
ShortSeq.ATT.E2	ATT count in E2
ShortSeq.ATT.I_3p	ATT count in 3'-intron
ShortSeq.ATT.I_5p	ATT count in 5'-intron
ShortSeq.CAA.E1	CAA count in E1
ShortSeq.CAA.E2	CAA count in E2
ShortSeq.CAA.I_3p	CAA count in 3'-intron
ShortSeq.CAA.I_5p	CAA count in 5'-intron
ShortSeq.CAC.E1	CAC count in E1
ShortSeq.CAC.E2	CAC count in E2
ShortSeq.CAC.I_3p	CAC count in 3'-intron
ShortSeq.CAC.I_5p	CAC count in 5'-intron
ShortSeq.CAG.E1	CAG count in E1
ShortSeq.CAG.E2	CAG count in E2
ShortSeq.CAG.I_3p	CAG count in 3'-intron
ShortSeq.CAG.I_5p	CAG count in 5'-intron
ShortSeq.CAT.E1	CAT count in E1
ShortSeq.CAT.E2	CAT count in E2
ShortSeq.CAT.I_3p	CAT count in 3'-intron
ShortSeq.CAT.I_5p	CAT count in 5'-intron
ShortSeq.CCA.E1	CCA count in E1
ShortSeq.CCA.E2	CCA count in E2
ShortSeq.CCA.I_3p	CCA count in 3'-intron
ShortSeq.CCA.I_5p	CCA count in 5'-intron
ShortSeq.CCC.E1	CCC count in E1
ShortSeq.CCC.E2	CCC count in E2
ShortSeq.CCC.I_3p	CCC count in 3'-intron
ShortSeq.CCC.I_5p	CCC count in 5'-intron
ShortSeq.CCG.E1	CCG count in E1
ShortSeq.CCG.E2	CCG count in E2
ShortSeq.CCG.I_3p	CCG count in 3'-intron
ShortSeq.CCG.I_5p	CCG count in 5'-intron
ShortSeq.CCT.E1	CCT count in E1
ShortSeq.CCT.E2	CCT count in E2
ShortSeq.CCT.I_3p	CCT count in 3'-intron
ShortSeq.CCT.I_5p	CCT count in 5'-intron
ShortSeq.CGA.E1	CGA count in E1
ShortSeq.CGA.E2	CGA count in E2
ShortSeq.CGA.I_3p	CGA count in 3'-intron
ShortSeq.CGA.I_5p	CGA count in 5'-intron
ShortSeq.CGC.E1	CGC count in E1
ShortSeq.CGC.E2	CGC count in E2
ShortSeq.CGC.I_3p	CGC count in 3'-intron
ShortSeq.CGC.I_5p	CGC count in 5'-intron
ShortSeq.CGG.E1	CGG count in E1
ShortSeq.CGG.E2	CGG count in E2
ShortSeq.CGG.I_3p	CGG count in 3'-intron
ShortSeq.CGG.I_5p	CGG count in 5'-intron
ShortSeq.CGT.E1	CGT count in E1
ShortSeq.CGT.E2	CGT count in E2
ShortSeq.CGT.I_3p	CGT count in 3'-intron
ShortSeq.CGT.I_5p	CGT count in 5'-intron
ShortSeq.CTA.E1	CTA count in E1
ShortSeq.CTA.E2	CTA count in E2
ShortSeq.CTA.I_3p	CTA count in 3'-intron
ShortSeq.CTA.I_5p	CTA count in 5'-intron
ShortSeq.CTC.E1	CTC count in E1
ShortSeq.CTC.E2	CTC count in E2
ShortSeq.CTC.I_3p	CTC count in 3'-intron
ShortSeq.CTC.I_5p	CTC count in 5'-intron
ShortSeq.CTG.E1	CTG count in E1
ShortSeq.CTG.E2	CTG count in E2
ShortSeq.CTG.I_3p	CTG count in 3'-intron
ShortSeq.CTG.I_5p	CTG count in 5'-intron
ShortSeq.CTT.E1	CTT count in E1
ShortSeq.CTT.E2	CTT count in E2
ShortSeq.CTT.I_3p	CTT count in 3'-intron
ShortSeq.CTT.I_5p	CTT count in 5'-intron
ShortSeq.GAA.E1	GAA count in E1
ShortSeq.GAA.E2	GAA count in E2
ShortSeq.GAA.I_3p	GAA count in 3'-intron
ShortSeq.GAA.I_5p	GAA count in 5'-intron
ShortSeq.GAC.E1	GAC count in E1
ShortSeq.GAC.E2	GAC count in E2
ShortSeq.GAC.I_3p	GAC count in 3'-intron
ShortSeq.GAC.I_5p	GAC count in 5'-intron
ShortSeq.GAG.E1	GAG count in E1
ShortSeq.GAG.E2	GAG count in E2
ShortSeq.GAG.I_3p	GAG count in 3'-intron
ShortSeq.GAG.I_5p	GAG count in 5'-intron
ShortSeq.GAT.E1	GAT count in E1
ShortSeq.GAT.E2	GAT count in E2
ShortSeq.GAT.I_3p	GAT count in 3'-intron
ShortSeq.GAT.I_5p	GAT count in 5'-intron
ShortSeq.GCA.E1	GCA count in E1
ShortSeq.GCA.E2	GCA count in E2
ShortSeq.GCA.I_3p	GCA count in 3'-intron
ShortSeq.GCA.I_5p	GCA count in 5'-intron
ShortSeq.GCC.E1	GCC count in E1
ShortSeq.GCC.E2	GCC count in E2
ShortSeq.GCC.I_3p	GCC count in 3'-intron
ShortSeq.GCC.I_5p	GCC count in 5'-intron
ShortSeq.GCG.E1	GCG count in E1
ShortSeq.GCG.E2	GCG count in E2
ShortSeq.GCG.I_3p	GCG count in 3'-intron
ShortSeq.GCG.I_5p	GCG count in 5'-intron
ShortSeq.GCT.E1	GCT count in E1
ShortSeq.GCT.E2	GCT count in E2
ShortSeq.GCT.I_3p	GCT count in 3'-intron
ShortSeq.GCT.I_5p	GCT count in 5'-intron
ShortSeq.GGA.E1	GGA count in E1
ShortSeq.GGA.E2	GGA count in E2
ShortSeq.GGA.I_3p	GGA count in 3'-intron
ShortSeq.GGA.I_5p	GGA count in 5'-intron
ShortSeq.GGC.E1	GGC count in E1
ShortSeq.GGC.E2	GGC count in E2
ShortSeq.GGC.I_3p	GGC count in 3'-intron
ShortSeq.GGC.I_5p	GGC count in 5'-intron
ShortSeq.GGG.E1	GGG count in E1
ShortSeq.GGG.E2	GGG count in E2
ShortSeq.GGG.I_3p	GGG count in 3'-intron
ShortSeq.GGG.I_5p	GGG count in 5'-intron
ShortSeq.GGT.E1	GGT count in E1
ShortSeq.GGT.E2	GGT count in E2
ShortSeq.GGT.I_3p	GGT count in 3'-intron
ShortSeq.GGT.I_5p	GGT count in 5'-intron
ShortSeq.GTA.E1	GTA count in E1
ShortSeq.GTA.E2	GTA count in E2
ShortSeq.GTA.I_3p	GTA count in 3'-intron
ShortSeq.GTA.I_5p	GTA count in 5'-intron
ShortSeq.GTC.E1	GTC count in E1
ShortSeq.GTC.E2	GTC count in E2
ShortSeq.GTC.I_3p	GTC count in 3'-intron
ShortSeq.GTC.I_5p	GTC count in 5'-intron
ShortSeq.GTG.E1	GTG count in E1
ShortSeq.GTG.E2	GTG count in E2
ShortSeq.GTG.I_3p	GTG count in 3'-intron
ShortSeq.GTG.I_5p	GTG count in 5'-intron
ShortSeq.GTT.E1	GTT count in E1
ShortSeq.GTT.E2	GTT count in E2
ShortSeq.GTT.I_3p	GTT count in 3'-intron
ShortSeq.GTT.I_5p	GTT count in 5'-intron
ShortSeq.TAA.E1	TAA count in E1
ShortSeq.TAA.E2	TAA count in E2
ShortSeq.TAA.I_3p	TAA count in 3'-intron
ShortSeq.TAA.I_5p	TAA count in 5'-intron
ShortSeq.TAC.E1	TAC count in E1
ShortSeq.TAC.E2	TAC count in E2
ShortSeq.TAC.I_3p	TAC count in 3'-intron
ShortSeq.TAC.I_5p	TAC count in 5'-intron
ShortSeq.TAG.E1	TAG count in E1
ShortSeq.TAG.E2	TAG count in E2
ShortSeq.TAG.I_3p	TAG count in 3'-intron
ShortSeq.TAG.I_5p	TAG count in 5'-intron
ShortSeq.TAT.E1	TAT count in E1
ShortSeq.TAT.E2	TAT count in E2
ShortSeq.TAT.I_3p	TAT count in 3'-intron
ShortSeq.TAT.I_5p	TAT count in 5'-intron
ShortSeq.TCA.E1	TCA count in E1
ShortSeq.TCA.E2	TCA count in E2
ShortSeq.TCA.I_3p	TCA count in 3'-intron
ShortSeq.TCA.I_5p	TCA count in 5'-intron
ShortSeq.TCC.E1	TCC count in E1
ShortSeq.TCC.E2	TCC count in E2
ShortSeq.TCC.I_3p	TCC count in 3'-intron
ShortSeq.TCC.I_5p	TCC count in 5'-intron
ShortSeq.TCG.E1	TCG count in E1
ShortSeq.TCG.E2	TCG count in E2
ShortSeq.TCG.I_3p	TCG count in 3'-intron
ShortSeq.TCG.I_5p	TCG count in 5'-intron
ShortSeq.TCT.E1	TCT count in E1
ShortSeq.TCT.E2	TCT count in E2
ShortSeq.TCT.I_3p	TCT count in 3'-intron
ShortSeq.TCT.I_5p	TCT count in 5'-intron
ShortSeq.TGA.E1	TGA count in E1
ShortSeq.TGA.E2	TGA count in E2
ShortSeq.TGA.I_3p	TGA count in 3'-intron
ShortSeq.TGA.I_5p	TGA count in 5'-intron
ShortSeq.TGC.E1	TGC count in E1
ShortSeq.TGC.E2	TGC count in E2
ShortSeq.TGC.I_3p	TGC count in 3'-intron
ShortSeq.TGC.I_5p	TGC count in 5'-intron
ShortSeq.TGG.E1	TGG count in E1
ShortSeq.TGG.E2	TGG count in E2
ShortSeq.TGG.I_3p	TGG count in 3'-intron
ShortSeq.TGG.I_5p	TGG count in 5'-intron
ShortSeq.TGT.E1	TGT count in E1
ShortSeq.TGT.E2	TGT count in E2
ShortSeq.TGT.I_3p	TGT count in 3'-intron
ShortSeq.TGT.I_5p	TGT count in 5'-intron
ShortSeq.TTA.E1	TTA count in E1
ShortSeq.TTA.E2	TTA count in E2
ShortSeq.TTA.I_3p	TTA count in 3'-intron
ShortSeq.TTA.I_5p	TTA count in 5'-intron
ShortSeq.TTC.E1	TTC count in E1
ShortSeq.TTC.E2	TTC count in E2
ShortSeq.TTC.I_3p	TTC count in 3'-intron
ShortSeq.TTC.I_5p	TTC count in 5'-intron
ShortSeq.TTG.E1	TTG count in E1
ShortSeq.TTG.E2	TTG count in E2
ShortSeq.TTG.I_3p	TTG count in 3'-intron
ShortSeq.TTG.I_5p	TTG count in 5'-intron
ShortSeq.TTT.E1	TTT count in E1
ShortSeq.TTT.E2	TTT count in E2
ShortSeq.TTT.I_3p	TTT count in 3'-intron
ShortSeq.TTT.I_5p	TTT count in 5'-intron
YeoClustUp.AAAGCA.I_3p	AAAGCA count in 3'-intron
YeoClustUp.AAAGCT.I_3p	AAAGCT count in 3'-intron
YeoClustUp.AAATCA.I_3p	AAATCA count in 3'-intron
YeoClustUp.AAATCT.I_3p	AAATCT count in 3'-intron
YeoClustUp.AAATGA.I_3p	AAATGA count in 3'-intron
YeoClustUp.AAATGT.I_3p	AAATGT count in 3'-intron
YeoClustUp.AAATT.I_3p	AAATT count in 3'-intron
YeoClustUp.AACAG.I_3p	AACAG count in 3'-intron
YeoClustUp.AAGCCA.I_3p	AAGCCA count in 3'-intron
YeoClustUp.AATAAT.I_3p	AATAAT count in 3'-intron
YeoClustUp.AATTACA.I_3p	AATTACA count in 3'-intron
YeoClustUp.AATTAT.I_3p	AATTAT count in 3'-intron
YeoClustUp.AATTC.I_3p	AATTC count in 3'-intron
YeoClustUp.AATTG.I_3p	AATTG count in 3'-intron
YeoClustUp.AATTTA.I_3p	AATTTA count in 3'-intron
YeoClustUp.AATTTT.I_3p	AATTTT count in 3'-intron
YeoClustUp.ACATTT.I_3p	ACATTT count in 3'-intron
YeoClustUp.ACTAAT.I_3p	ACTAAT count in 3'-intron
YeoClustUp.AGAAAA.I_3p	AGAAAA count in 3'-intron
YeoClustUp.AGAAAT.I_3p	AGAAAT count in 3'-intron
YeoClustUp.AGATTT.I_3p	AGATTT count in 3'-intron
YeoClustUp.ATAATT.I_3p	ATAATT count in 3'-intron
YeoClustUp.ATATTT.I_3p	ATATTT count in 3'-intron
YeoClustUp.ATCAAA.I_3p	ATCAAA count in 3'-intron
YeoClustUp.ATGAAA.I_3p	ATGAAA count in 3'-intron
YeoClustUp.ATGTTT.I_3p	ATGTTT count in 3'-intron
YeoClustUp.ATTAAAT.I_3p	ATTAAAT count in 3'-intron
YeoClustUp.ATTAG.I_3p	ATTAG count in 3'-intron
YeoClustUp.ATTCT.I_3p	ATTCT count in 3'-intron
YeoClustUp.ATTTGT.I_3p	ATTTGT count in 3'-intron
YeoClustUp.ATTTTCT.I_3p	ATTTTCT count in 3'-intron
YeoClustUp.CAAAT.I_3p	CAAAT count in 3'-intron
YeoClustUp.CATAAA.I_3p	CATAAA count in 3'-intron
YeoClustUp.CATTTA.I_3p	CATTTA count in 3'-intron
YeoClustUp.CATTTG.I_3p	CATTTG count in 3'-intron
YeoClustUp.CCACAG.I_3p	CCACAG count in 3'-intron
YeoClustUp.CCCCAG.I_3p	CCCCAG count in 3'-intron
YeoClustUp.CCTCT.I_3p	CCTCT count in 3'-intron
YeoClustUp.CCTGCAG.I_3p	CCTGCAG count in 3'-intron
YeoClustUp.CTAAA.I_3p	CTAAA count in 3'-intron
YeoClustUp.CTAAC.I_3p	CTAAC count in 3'-intron
YeoClustUp.CTCAG.I_3p	CTCAG count in 3'-intron
YeoClustUp.CTCTG.I_3p	CTCTG count in 3'-intron
YeoClustUp.CTGAA.I_3p	CTGAA count in 3'-intron
YeoClustUp.CTGACT.I_3p	CTGACT count in 3'-intron
YeoClustUp.CTGAT.I_3p	CTGAT count in 3'-intron
YeoClustUp.CTGCT.I_3p	CTGCT count in 3'-intron
YeoClustUp.CTTCCA.I_3p	CTTCCA count in 3'-intron
YeoClustUp.CTTCT.I_3p	CTTCT count in 3'-intron
YeoClustUp.CTTGAC.I_3p	CTTGAC count in 3'-intron
YeoClustUp.CTTGATT.I_3p	CTTGATT count in 3'-intron
YeoClustUp.CTTGC.I_3p	CTTGC count in 3'-intron
YeoClustUp.CTTGTC.I_3p	CTTGTC count in 3'-intron
YeoClustUp.CTTTA.I_3p	CTTTA count in 3'-intron
YeoClustUp.CTTTCA.I_3p	CTTTCA count in 3'-intron
YeoClustUp.CTTTT.I_3p	CTTTT count in 3'-intron
YeoClustUp.GAAAAT.I_3p	GAAAAT count in 3'-intron
YeoClustUp.GATTTT.I_3p	GATTTT count in 3'-intron
YeoClustUp.GCTGACC.I_3p	GCTGACC count in 3'-intron
YeoClustUp.GCTTTGC.I_3p	GCTTTGC count in 3'-intron
YeoClustUp.GTAAG.I_3p	GTAAG count in 3'-intron
YeoClustUp.GTAGGT.I_3p	GTAGGT count in 3'-intron
YeoClustUp.GTCAGT.I_3p	GTCAGT count in 3'-intron
YeoClustUp.GTGAG.I_3p	GTGAG count in 3'-intron
YeoClustUp.GTTTAAT.I_3p	GTTTAAT count in 3'-intron
YeoClustUp.GTTTCT.I_3p	GTTTCT count in 3'-intron
YeoClustUp.GTTTGT.I_3p	GTTTGT count in 3'-intron
YeoClustUp.GTTTT.I_3p	GTTTT count in 3'-intron
YeoClustUp.TAAAAT.I_3p	TAAAAT count in 3'-intron
YeoClustUp.TAACC.I_3p	TAACC count in 3'-intron
YeoClustUp.TAACT.I_3p	TAACT count in 3'-intron
YeoClustUp.TAAGA.I_3p	TAAGA count in 3'-intron
YeoClustUp.TAAGT.I_3p	TAAGT count in 3'-intron
YeoClustUp.TAATA.I_3p	TAATA count in 3'-intron
YeoClustUp.TAATG.I_3p	TAATG count in 3'-intron
YeoClustUp.TAATTTG.I_3p	TAATTTG count in 3'-intron
YeoClustUp.TCAGA.I_3p	TCAGA count in 3'-intron
YeoClustUp.TCATTTC.I_3p	TCATTTC count in 3'-intron
YeoClustUp.TCCAG.I_3p	TCCAG count in 3'-intron
YeoClustUp.TCCATTT.I_3p	TCCATTT count in 3'-intron
YeoClustUp.TCCTAG.I_3p	TCCTAG count in 3'-intron
YeoClustUp.TCTCC.I_3p	TCTCC count in 3'-intron
YeoClustUp.TCTCT.I_3p	TCTCT count in 3'-intron
YeoClustUp.TCTGA.I_3p	TCTGA count in 3'-intron
YeoClustUp.TCTGC.I_3p	TCTGC count in 3'-intron
YeoClustUp.TCTGG.I_3p	TCTGG count in 3'-intron
YeoClustUp.TCTGTT.I_3p	TCTGTT count in 3'-intron
YeoClustUp.TCTTA.I_3p	TCTTA count in 3'-intron
YeoClustUp.TCTTC.I_3p	TCTTC count in 3'-intron
YeoClustUp.TCTTG.I_3p	TCTTG count in 3'-intron
YeoClustUp.TCTTT.I_3p	TCTTT count in 3'-intron
YeoClustUp.TGAAAG.I_3p	TGAAAG count in 3'-intron
YeoClustUp.TGAATT.I_3p	TGAATT count in 3'-intron
YeoClustUp.TGAGAA.I_3p	TGAGAA count in 3'-intron
YeoClustUp.TGAGT.I_3p	TGAGT count in 3'-intron
YeoClustUp.TGATAA.I_3p	TGATAA count in 3'-intron
YeoClustUp.TGATTA.I_3p	TGATTA count in 3'-intron
YeoClustUp.TGATTTC.I_3p	TGATTTC count in 3'-intron
YeoClustUp.TGCAT.I_3p	TGCAT count in 3'-intron
YeoClustUp.TGCATG.I_3p	TGCATG count in 3'-intron
YeoClustUp.TGCTAA.I_3p	TGCTAA count in 3'-intron
YeoClustUp.TGCTT.I_3p	TGCTT count in 3'-intron
YeoClustUp.TGGAAAT.I_3p	TGGAAAT count in 3'-intron
YeoClustUp.TGGATTT.I_3p	TGGATTT count in 3'-intron
YeoClustUp.TGGCTT.I_3p	TGGCTT count in 3'-intron
YeoClustUp.TGGTTT.I_3p	TGGTTT count in 3'-intron
YeoClustUp.TGTCT.I_3p	TGTCT count in 3'-intron
YeoClustUp.TGTGTC.I_3p	TGTGTC count in 3'-intron
YeoClustUp.TGTGTT.I_3p	TGTGTT count in 3'-intron
YeoClustUp.TGTTAA.I_3p	TGTTAA count in 3'-intron
YeoClustUp.TGTTCT.I_3p	TGTTCT count in 3'-intron
YeoClustUp.TGTTGA.I_3p	TGTTGA count in 3'-intron
YeoClustUp.TGTTTC.I_3p	TGTTTC count in 3'-intron
YeoClustUp.TTAAAAC.I_3p	TTAAAAC count in 3'-intron
YeoClustUp.TTAAAC.I_3p	TTAAAC count in 3'-intron
YeoClustUp.TTAACA.I_3p	TTAACA count in 3'-intron
YeoClustUp.TTAAG.I_3p	TTAAG count in 3'-intron
YeoClustUp.TTACAG.I_3p	TTACAG count in 3'-intron
YeoClustUp.TTAGAA.I_3p	TTAGAA count in 3'-intron
YeoClustUp.TTAGCA.I_3p	TTAGCA count in 3'-intron
YeoClustUp.TTATTGA.I_3p	TTATTGA count in 3'-intron
YeoClustUp.TTATTTC.I_3p	TTATTTC count in 3'-intron
YeoClustUp.TTCAAAA.I_3p	TTCAAAA count in 3'-intron
YeoClustUp.TTCACA.I_3p	TTCACA count in 3'-intron
YeoClustUp.TTCCTT.I_3p	TTCCTT count in 3'-intron
YeoClustUp.TTCTAG.I_3p	TTCTAG count in 3'-intron
YeoClustUp.TTCTC.I_3p	TTCTC count in 3'-intron
YeoClustUp.TTCTT.I_3p	TTCTT count in 3'-intron
YeoClustUp.TTGAAAT.I_3p	TTGAAAT count in 3'-intron
YeoClustUp.TTGCAG.I_3p	TTGCAG count in 3'-intron
YeoClustUp.TTGCATT.I_3p	TTGCATT count in 3'-intron
YeoClustUp.TTGCCT.I_3p	TTGCCT count in 3'-intron
YeoClustUp.TTGCTG.I_3p	TTGCTG count in 3'-intron
YeoClustUp.TTGGT.I_3p	TTGGT count in 3'-intron
YeoClustUp.TTGTAA.I_3p	TTGTAA count in 3'-intron
YeoClustUp.TTTAAC.I_3p	TTTAAC count in 3'-intron
YeoClustUp.TTTAC.I_3p	TTTAC count in 3'-intron
YeoClustUp.TTTACAG.I_3p	TTTACAG count in 3'-intron
YeoClustUp.TTTAG.I_3p	TTTAG count in 3'-intron
YeoClustUp.TTTATA.I_3p	TTTATA count in 3'-intron
YeoClustUp.TTTATAG.I_3p	TTTATAG count in 3'-intron
YeoClustUp.TTTATC.I_3p	TTTATC count in 3'-intron
YeoClustUp.TTTATG.I_3p	TTTATG count in 3'-intron
YeoClustUp.TTTATTC.I_3p	TTTATTC count in 3'-intron
YeoClustUp.TTTCAG.I_3p	TTTCAG count in 3'-intron
YeoClustUp.TTTCAT.I_3p	TTTCAT count in 3'-intron
YeoClustUp.TTTCCAA.I_3p	TTTCCAA count in 3'-intron
YeoClustUp.TTTGACT.I_3p	TTTGACT count in 3'-intron
YeoClustUp.TTTGGT.I_3p	TTTGGT count in 3'-intron
YeoClustUp.TTTGTAG.I_3p	TTTGTAG count in 3'-intron
YeoClustUp.TTTTAAA.I_3p	TTTTAAA count in 3'-intron
YeoClustUp.TTTTCC.I_3p	TTTTCC count in 3'-intron
YeoClustUp.TTTTGAT.I_3p	TTTTGAT count in 3'-intron
YeoClustUp.TTTTGC.I_3p	TTTTGC count in 3'-intron
YeoClustUp.TTTTGGC.I_3p	TTTTGGC count in 3'-intron
YeoClustUp.TTTTTC.I_3p	TTTTTC count in 3'-intron
YeoClustDown.AAAGA.I_5p	AAAGA count in 5'-intron
YeoClustDown.AAATCA.I_5p	AAATCA count in 5'-intron
YeoClustDown.AAATGA.I_5p	AAATGA count in 5'-intron
YeoClustDown.AAATGT.I_5p	AAATGT count in 5'-intron
YeoClustDown.AAATT.I_5p	AAATT count in 5'-intron
YeoClustDown.AAGAT.I_5p	AAGAT count in 5'-intron
YeoClustDown.AAGCA.I_5p	AAGCA count in 5'-intron
YeoClustDown.AAGCT.I_5p	AAGCT count in 5'-intron
YeoClustDown.AAGTA.I_5p	AAGTA count in 5'-intron
YeoClustDown.AAGTC.I_5p	AAGTC count in 5'-intron
YeoClustDown.AAGTGT.I_5p	AAGTGT count in 5'-intron
YeoClustDown.AATTAT.I_5p	AATTAT count in 5'-intron
YeoClustDown.AATTCA.I_5p	AATTCA count in 5'-intron
YeoClustDown.AATTG.I_5p	AATTG count in 5'-intron
YeoClustDown.AATTGA.I_5p	AATTGA count in 5'-intron
YeoClustDown.AATTTA.I_5p	AATTTA count in 5'-intron
YeoClustDown.ACATTT.I_5p	ACATTT count in 5'-intron
YeoClustDown.ACTAAC.I_5p	ACTAAC count in 5'-intron
YeoClustDown.ACTAAT.I_5p	ACTAAT count in 5'-intron
YeoClustDown.AGAAAA.I_5p	AGAAAA count in 5'-intron
YeoClustDown.AGAAAT.I_5p	AGAAAT count in 5'-intron
YeoClustDown.AGAATT.I_5p	AGAATT count in 5'-intron
YeoClustDown.AGAGCCA.I_5p	AGAGCCA count in 5'-intron
YeoClustDown.AGATTT.I_5p	AGATTT count in 5'-intron
YeoClustDown.AGCTTT.I_5p	AGCTTT count in 5'-intron
YeoClustDown.AGTAA.I_5p	AGTAA count in 5'-intron
YeoClustDown.AGTAT.I_5p	AGTAT count in 5'-intron
YeoClustDown.AGTTTT.I_5p	AGTTTT count in 5'-intron
YeoClustDown.ATAATT.I_5p	ATAATT count in 5'-intron
YeoClustDown.ATATTT.I_5p	ATATTT count in 5'-intron
YeoClustDown.ATCAAA.I_5p	ATCAAA count in 5'-intron
YeoClustDown.ATGAAA.I_5p	ATGAAA count in 5'-intron
YeoClustDown.ATGTTT.I_5p	ATGTTT count in 5'-intron
YeoClustDown.ATTAACA.I_5p	ATTAACA count in 5'-intron
YeoClustDown.ATTCT.I_5p	ATTCT count in 5'-intron
YeoClustDown.CAAAT.I_5p	CAAAT count in 5'-intron
YeoClustDown.CATAAA.I_5p	CATAAA count in 5'-intron
YeoClustDown.CATTTG.I_5p	CATTTG count in 5'-intron
YeoClustDown.CCACAG.I_5p	CCACAG count in 5'-intron
YeoClustDown.CTAAA.I_5p	CTAAA count in 5'-intron
YeoClustDown.CTGAA.I_5p	CTGAA count in 5'-intron
YeoClustDown.CTGACT.I_5p	CTGACT count in 5'-intron
YeoClustDown.CTGCT.I_5p	CTGCT count in 5'-intron
YeoClustDown.CTTTA.I_5p	CTTTA count in 5'-intron
YeoClustDown.CTTTCA.I_5p	CTTTCA count in 5'-intron
YeoClustDown.CTTTGCT.I_5p	CTTTGCT count in 5'-intron
YeoClustDown.CTTTT.I_5p	CTTTT count in 5'-intron
YeoClustDown.GAAAAT.I_5p	GAAAAT count in 5'-intron
YeoClustDown.GAAATA.I_5p	GAAATA count in 5'-intron
YeoClustDown.GAGAAA.I_5p	GAGAAA count in 5'-intron
YeoClustDown.GAGCTG.I_5p	GAGCTG count in 5'-intron
YeoClustDown.GAGTA.I_5p	GAGTA count in 5'-intron
YeoClustDown.GAGTG.I_5p	GAGTG count in 5'-intron
YeoClustDown.GCAAGT.I_5p	GCAAGT count in 5'-intron
YeoClustDown.GCATG.I_5p	GCATG count in 5'-intron
YeoClustDown.GCATTT.I_5p	GCATTT count in 5'-intron
YeoClustDown.GCTTCT.I_5p	GCTTCT count in 5'-intron
YeoClustDown.GCTTGGC.I_5p	GCTTGGC count in 5'-intron
YeoClustDown.GTAAAA.I_5p	GTAAAA count in 5'-intron
YeoClustDown.GTAAAG.I_5p	GTAAAG count in 5'-intron
YeoClustDown.GTAAC.I_5p	GTAAC count in 5'-intron
YeoClustDown.GTAAG.I_5p	GTAAG count in 5'-intron
YeoClustDown.GTAAT.I_5p	GTAAT count in 5'-intron
YeoClustDown.GTACGT.I_5p	GTACGT count in 5'-intron
YeoClustDown.GTACTGT.I_5p	GTACTGT count in 5'-intron
YeoClustDown.GTAGG.I_5p	GTAGG count in 5'-intron
YeoClustDown.GTATCCT.I_5p	GTATCCT count in 5'-intron
YeoClustDown.GTATG.I_5p	GTATG count in 5'-intron
YeoClustDown.GTATTT.I_5p	GTATTT count in 5'-intron
YeoClustDown.GTCAGT.I_5p	GTCAGT count in 5'-intron
YeoClustDown.GTCTG.I_5p	GTCTG count in 5'-intron
YeoClustDown.GTGAG.I_5p	GTGAG count in 5'-intron
YeoClustDown.GTGGGT.I_5p	GTGGGT count in 5'-intron
YeoClustDown.GTTAAA.I_5p	GTTAAA count in 5'-intron
YeoClustDown.GTTAGT.I_5p	GTTAGT count in 5'-intron
YeoClustDown.GTTGGT.I_5p	GTTGGT count in 5'-intron
YeoClustDown.GTTTCT.I_5p	GTTTCT count in 5'-intron
YeoClustDown.GTTTGT.I_5p	GTTTGT count in 5'-intron
YeoClustDown.GTTTT.I_5p	GTTTT count in 5'-intron
YeoClustDown.TAAAAT.I_5p	TAAAAT count in 5'-intron
YeoClustDown.TAAATG.I_5p	TAAATG count in 5'-intron
YeoClustDown.TAACC.I_5p	TAACC count in 5'-intron
YeoClustDown.TAACT.I_5p	TAACT count in 5'-intron
YeoClustDown.TAAGA.I_5p	TAAGA count in 5'-intron
YeoClustDown.TAAGC.I_5p	TAAGC count in 5'-intron
YeoClustDown.TAAGG.I_5p	TAAGG count in 5'-intron
YeoClustDown.TAAGT.I_5p	TAAGT count in 5'-intron
YeoClustDown.TAATA.I_5p	TAATA count in 5'-intron
YeoClustDown.TAATG.I_5p	TAATG count in 5'-intron
YeoClustDown.TAATTTG.I_5p	TAATTTG count in 5'-intron
YeoClustDown.TAGAAA.I_5p	TAGAAA count in 5'-intron
YeoClustDown.TAGGT.I_5p	TAGGT count in 5'-intron
YeoClustDown.TATCCT.I_5p	TATCCT count in 5'-intron
YeoClustDown.TATGT.I_5p	TATGT count in 5'-intron
YeoClustDown.TATTTC.I_5p	TATTTC count in 5'-intron
YeoClustDown.TATTTG.I_5p	TATTTG count in 5'-intron
YeoClustDown.TCAGA.I_5p	TCAGA count in 5'-intron
YeoClustDown.TCATTTT.I_5p	TCATTTT count in 5'-intron
YeoClustDown.TCCTTT.I_5p	TCCTTT count in 5'-intron
YeoClustDown.TCTGA.I_5p	TCTGA count in 5'-intron
YeoClustDown.TCTGC.I_5p	TCTGC count in 5'-intron
YeoClustDown.TCTGG.I_5p	TCTGG count in 5'-intron
YeoClustDown.TCTTAA.I_5p	TCTTAA count in 5'-intron
YeoClustDown.TCTTT.I_5p	TCTTT count in 5'-intron
YeoClustDown.TGAAAG.I_5p	TGAAAG count in 5'-intron
YeoClustDown.TGAAG.I_5p	TGAAG count in 5'-intron
YeoClustDown.TGAATT.I_5p	TGAATT count in 5'-intron
YeoClustDown.TGAGAA.I_5p	TGAGAA count in 5'-intron
YeoClustDown.TGAGC.I_5p	TGAGC count in 5'-intron
YeoClustDown.TGAGG.I_5p	TGAGG count in 5'-intron
YeoClustDown.TGAGT.I_5p	TGAGT count in 5'-intron
YeoClustDown.TGATAAA.I_5p	TGATAAA count in 5'-intron
YeoClustDown.TGATTA.I_5p	TGATTA count in 5'-intron
YeoClustDown.TGATTTG.I_5p	TGATTTG count in 5'-intron
YeoClustDown.TGATTTT.I_5p	TGATTTT count in 5'-intron
YeoClustDown.TGCAT.I_5p	TGCAT count in 5'-intron
YeoClustDown.TGCATG.I_5p	TGCATG count in 5'-intron
YeoClustDown.TGCCAGC.I_5p	TGCCAGC count in 5'-intron
YeoClustDown.TGCCTTT.I_5p	TGCCTTT count in 5'-intron
YeoClustDown.TGCTAA.I_5p	TGCTAA count in 5'-intron
YeoClustDown.TGCTT.I_5p	TGCTT count in 5'-intron
YeoClustDown.TGGAAAT.I_5p	TGGAAAT count in 5'-intron
YeoClustDown.TGGCTT.I_5p	TGGCTT count in 5'-intron
YeoClustDown.TGGTTT.I_5p	TGGTTT count in 5'-intron
YeoClustDown.TGTCT.I_5p	TGTCT count in 5'-intron
YeoClustDown.TGTTAA.I_5p	TGTTAA count in 5'-intron
YeoClustDown.TGTTCT.I_5p	TGTTCT count in 5'-intron
YeoClustDown.TGTTTAA.I_5p	TGTTTAA count in 5'-intron
YeoClustDown.TTAAG.I_5p	TTAAG count in 5'-intron
YeoClustDown.TTAATCT.I_5p	TTAATCT count in 5'-intron
YeoClustDown.TTAGA.I_5p	TTAGA count in 5'-intron
YeoClustDown.TTAGCA.I_5p	TTAGCA count in 5'-intron
YeoClustDown.TTAGTT.I_5p	TTAGTT count in 5'-intron
YeoClustDown.TTCACAG.I_5p	TTCACAG count in 5'-intron
YeoClustDown.TTCTAA.I_5p	TTCTAA count in 5'-intron
YeoClustDown.TTCTCT.I_5p	TTCTCT count in 5'-intron
YeoClustDown.TTCTGT.I_5p	TTCTGT count in 5'-intron
YeoClustDown.TTCTT.I_5p	TTCTT count in 5'-intron
YeoClustDown.TTGAAAT.I_5p	TTGAAAT count in 5'-intron
YeoClustDown.TTGCAG.I_5p	TTGCAG count in 5'-intron
YeoClustDown.TTGGTT.I_5p	TTGGTT count in 5'-intron
YeoClustDown.TTTACAG.I_5p	TTTACAG count in 5'-intron
YeoClustDown.TTTAG.I_5p	TTTAG count in 5'-intron
YeoClustDown.TTTATA.I_5p	TTTATA count in 5'-intron
YeoClustDown.TTTATAA.I_5p	TTTATAA count in 5'-intron
YeoClustDown.TTTATC.I_5p	TTTATC count in 5'-intron
YeoClustDown.TTTATG.I_5p	TTTATG count in 5'-intron
YeoClustDown.TTTATTC.I_5p	TTTATTC count in 5'-intron
YeoClustDown.TTTCAG.I_5p	TTTCAG count in 5'-intron
YeoClustDown.TTTCAT.I_5p	TTTCAT count in 5'-intron
YeoClustDown.TTTCCAA.I_5p	TTTCCAA count in 5'-intron
YeoClustDown.TTTCTA.I_5p	TTTCTA count in 5'-intron
YeoClustDown.TTTCTC.I_5p	TTTCTC count in 5'-intron
YeoClustDown.TTTGCC.I_5p	TTTGCC count in 5'-intron
YeoClustDown.TTTTAAA.I_5p	TTTTAAA count in 5'-intron
YeoClustDown.TTTTCTG.I_5p	TTTTCTG count in 5'-intron
YeoClustDown.TTTTGAT.I_5p	TTTTGAT count in 5'-intron
YeoClustDown.TTTTGC.I_5p	TTTTGC count in 5'-intron
donor.maxent	Strength of donor (MaxEnt)
acceptor.maxent	Strength of acceptor (MaxEnt)
SecStr.maxI_5p_1_70	RNA secondary structure feature: maximum availability of the first 70nt in 5'-intron junction (real number, 0-1)
SecStr.avgI_5p_1_70	RNA secondary structure feature: average availability of the first 70nt in 5'-intron junction (real number, 0-1)
SecStr.maxJunc_I_3p
SecStr.avgJunc_I_3p
SecStr.maxI_3p_1_70
SecStr.avgI_3p_1_70
SecStr.maxI_3p_71_140
SecStr.avgI_3p_71_140
SecStr.maxI_5p_141_210
SecStr.avgI_5p_141_210
SecStr.maxJunc_I_5p
SecStr.avgJunc_I_5p
SecStr.maxI_5p_71_140
SecStr.avgI_5p_71_140
SecStr.maxI_3p_141_210
SecStr.avgI_3p_141_210
NucPos.occupAvg1|100.I_5p	Probability of nucleosome positioning in the first 100nt of 5'-intron
NucPos.occupAvg-50|-1.E1	Probability of nucleosome positioning in the last 50nt of E1
NucPos.occupAvg-100|-1.I_3p	Probability of nucleosome positioning in the last 100nt of 3'-intron
NucPos.occupAvg1|50.E2	Probability of nucleosome positioning in the first 50nt of E2
A1CF.I_3p	Motif score of A1CF in 3'-intron
A1CF.I_3p.withCons	Motif score of A1CF in 3'-intron weighted by conservation
A1CF.I_5p	Motif score of A1CF in 5'-intron
A1CF.I_5p.withCons	Motif score of A1CF in 5'-intron weighted by conservation
A1CF.E1	Motif score of A1CF in E1
A1CF.E2	Motif score of A1CF in E2
TUT1.I_3p	Motif score of TUT1 in 3'-intron
TUT1.I_3p.withCons	Motif score of TUT1 in 3'-intron weighted by conservation
TUT1.I_5p	Motif score of TUT1 in 5'-intron
TUT1.I_5p.withCons	Motif score of TUT1 in 5'-intron weighted by conservation
TUT1.E1	Motif score of TUT1 in E1
TUT1.E2	Motif score of TUT1 in E2
SRSF9_v1.I_3p	Motif score of SRSF9 in 3'-intron
SRSF9_v1.I_3p.withCons	Motif score of SRSF9 in 3'-intron weighted by conservation
SRSF9_v1.I_5p	Motif score of SRSF9 in 5'-intron
SRSF9_v1.I_5p.withCons	Motif score of SRSF9 in 5'-intron weighted by conservation
SRSF9_v1.E1	Motif score of SRSF9 in E1
SRSF9_v1.E2	Motif score of SRSF9 in E2
HNRNPA1.I_3p	Motif score of HNRNPA1 in 3'-intron
HNRNPA1.I_3p.withCons	Motif score of HNRNPA1 in 3'-intron weighted by conservation
HNRNPA1.I_5p	Motif score of HNRNPA1 in 5'-intron
HNRNPA1.I_5p.withCons	Motif score of HNRNPA1 in 5'-intron weighted by conservation
HNRNPA1.E1	Motif score of HNRNPA1 in E1
HNRNPA1.E2	Motif score of HNRNPA1 in E2
RBMS1.I_3p	Motif score of RBMS1 in 3'-intron
RBMS1.I_3p.withCons	Motif score of RBMS1 in 3'-intron weighted by conservation
RBMS1.I_5p	Motif score of RBMS1 in 5'-intron
RBMS1.I_5p.withCons	Motif score of RBMS1 in 5'-intron weighted by conservation
RBMS1.E1	Motif score of RBMS1 in E1
RBMS1.E2	Motif score of RBMS1 in E2
CPEB2.I_3p	Motif score of CPEB2 in 3'-intron
CPEB2.I_3p.withCons	Motif score of CPEB2 in 3'-intron weighted by conservation
CPEB2.I_5p	Motif score of CPEB2 in 5'-intron
CPEB2.I_5p.withCons	Motif score of CPEB2 in 5'-intron weighted by conservation
CPEB2.E1	Motif score of CPEB2 in E1
CPEB2.E2	Motif score of CPEB2 in E2
RBM45.I_3p	Motif score of RBM45 in 3'-intron
RBM45.I_3p.withCons	Motif score of RBM45 in 3'-intron weighted by conservation
RBM45.I_5p	Motif score of RBM45 in 5'-intron
RBM45.I_5p.withCons	Motif score of RBM45 in 5'-intron weighted by conservation
RBM45.E1	Motif score of RBM45 in E1
RBM45.E2	Motif score of RBM45 in E2
PABPC1.I_3p	Motif score of PABPC1 in 3'-intron
PABPC1.I_3p.withCons	Motif score of PABPC1 in 3'-intron weighted by conservation
PABPC1.I_5p	Motif score of PABPC1 in 5'-intron
PABPC1.I_5p.withCons	Motif score of PABPC1 in 5'-intron weighted by conservation
PABPC1.E1	Motif score of PABPC1 in E1
PABPC1.E2	Motif score of PABPC1 in E2
CELF4.I_3p	Motif score of CELF4 in 3'-intron
CELF4.I_3p.withCons	Motif score of CELF4 in 3'-intron weighted by conservation
CELF4.I_5p	Motif score of CELF4 in 5'-intron
CELF4.I_5p.withCons	Motif score of CELF4 in 5'-intron weighted by conservation
CELF4.E1	Motif score of CELF4 in E1
CELF4.E2	Motif score of CELF4 in E2
KHDRBS2.I_3p	Motif score of KHDRBS2 in 3'-intron
KHDRBS2.I_3p.withCons	Motif score of KHDRBS2 in 3'-intron weighted by conservation
KHDRBS2.I_5p	Motif score of KHDRBS2 in 5'-intron
KHDRBS2.I_5p.withCons	Motif score of KHDRBS2 in 5'-intron weighted by conservation
KHDRBS2.E1	Motif score of KHDRBS2 in E1
KHDRBS2.E2	Motif score of KHDRBS2 in E2
HNRNPLL.I_3p	Motif score of HNRNPLL in 3'-intron
HNRNPLL.I_3p.withCons	Motif score of HNRNPLL in 3'-intron weighted by conservation
HNRNPLL.I_5p	Motif score of HNRNPLL in 5'-intron
HNRNPLL.I_5p.withCons	Motif score of HNRNPLL in 5'-intron weighted by conservation
HNRNPLL.E1	Motif score of HNRNPLL in E1
HNRNPLL.E2	Motif score of HNRNPLL in E2
HNRNPA2B1.I_3p	Motif score of HNRNPA2B1 in 3'-intron
HNRNPA2B1.I_3p.withCons	Motif score of HNRNPA2B1 in 3'-intron weighted by conservation
HNRNPA2B1.I_5p	Motif score of HNRNPA2B1 in 5'-intron
HNRNPA2B1.I_5p.withCons	Motif score of HNRNPA2B1 in 5'-intron weighted by conservation
HNRNPA2B1.E1	Motif score of HNRNPA2B1 in E1
HNRNPA2B1.E2	Motif score of HNRNPA2B1 in E2
G3BP2.I_3p	Motif score of G3BP2 in 3'-intron
G3BP2.I_3p.withCons	Motif score of G3BP2 in 3'-intron weighted by conservation
G3BP2.I_5p	Motif score of G3BP2 in 5'-intron
G3BP2.I_5p.withCons	Motif score of G3BP2 in 5'-intron weighted by conservation
G3BP2.E1	Motif score of G3BP2 in E1
G3BP2.E2	Motif score of G3BP2 in E2
PTBP1_v2.I_3p	Motif score of PTBP1 in 3'-intron
PTBP1_v2.I_3p.withCons	Motif score of PTBP1 in 3'-intron weighted by conservation
PTBP1_v2.I_5p	Motif score of PTBP1 in 5'-intron
PTBP1_v2.I_5p.withCons	Motif score of PTBP1 in 5'-intron weighted by conservation
PTBP1_v2.E1	Motif score of PTBP1 in E1
PTBP1_v2.E2	Motif score of PTBP1 in E2
RALY.I_3p	Motif score of RALY in 3'-intron
RALY.I_3p.withCons	Motif score of RALY in 3'-intron weighted by conservation
RALY.I_5p	Motif score of RALY in 5'-intron
RALY.I_5p.withCons	Motif score of RALY in 5'-intron weighted by conservation
RALY.E1	Motif score of RALY in E1
RALY.E2	Motif score of RALY in E2
RBM41.I_3p	Motif score of RBM41 in 3'-intron
RBM41.I_3p.withCons	Motif score of RBM41 in 3'-intron weighted by conservation
RBM41.I_5p	Motif score of RBM41 in 5'-intron
RBM41.I_5p.withCons	Motif score of RBM41 in 5'-intron weighted by conservation
RBM41.E1	Motif score of RBM41 in E1
RBM41.E2	Motif score of RBM41 in E2
ELAVL1_v4.I_3p	Motif score of ELAVL1 in 3'-intron
ELAVL1_v4.I_3p.withCons	Motif score of ELAVL1 in 3'-intron weighted by conservation
ELAVL1_v4.I_5p	Motif score of ELAVL1 in 5'-intron
ELAVL1_v4.I_5p.withCons	Motif score of ELAVL1 in 5'-intron weighted by conservation
ELAVL1_v4.E1	Motif score of ELAVL1 in E1
ELAVL1_v4.E2	Motif score of ELAVL1 in E2
SFPQ.I_3p	Motif score of SFPQ in 3'-intron
SFPQ.I_3p.withCons	Motif score of SFPQ in 3'-intron weighted by conservation
SFPQ.I_5p	Motif score of SFPQ in 5'-intron
SFPQ.I_5p.withCons	Motif score of SFPQ in 5'-intron weighted by conservation
SFPQ.E1	Motif score of SFPQ in E1
SFPQ.E2	Motif score of SFPQ in E2
SRSF1_v3.I_3p	Motif score of SRSF1 in 3'-intron
SRSF1_v3.I_3p.withCons	Motif score of SRSF1 in 3'-intron weighted by conservation
SRSF1_v3.I_5p	Motif score of SRSF1 in 5'-intron
SRSF1_v3.I_5p.withCons	Motif score of SRSF1 in 5'-intron weighted by conservation
SRSF1_v3.E1	Motif score of SRSF1 in E1
SRSF1_v3.E2	Motif score of SRSF1 in E2
HNRNPA1L2.I_3p	Motif score of HNRNPA1L2 in 3'-intron
HNRNPA1L2.I_3p.withCons	Motif score of HNRNPA1L2 in 3'-intron weighted by conservation
HNRNPA1L2.I_5p	Motif score of HNRNPA1L2 in 5'-intron
HNRNPA1L2.I_5p.withCons	Motif score of HNRNPA1L2 in 5'-intron weighted by conservation
HNRNPA1L2.E1	Motif score of HNRNPA1L2 in E1
HNRNPA1L2.E2	Motif score of HNRNPA1L2 in E2
QKI.I_3p	Motif score of QKI in 3'-intron
QKI.I_3p.withCons	Motif score of QKI in 3'-intron weighted by conservation
QKI.I_5p	Motif score of QKI in 5'-intron
QKI.I_5p.withCons	Motif score of QKI in 5'-intron weighted by conservation
QKI.E1	Motif score of QKI in E1
QKI.E2	Motif score of QKI in E2
SNRPA.I_3p	Motif score of SNRPA in 3'-intron
SNRPA.I_3p.withCons	Motif score of SNRPA in 3'-intron weighted by conservation
SNRPA.I_5p	Motif score of SNRPA in 5'-intron
SNRPA.I_5p.withCons	Motif score of SNRPA in 5'-intron weighted by conservation
SNRPA.E1	Motif score of SNRPA in E1
SNRPA.E2	Motif score of SNRPA in E2
YBX1_v2.I_3p	Motif score of YBX1 in 3'-intron
YBX1_v2.I_3p.withCons	Motif score of YBX1 in 3'-intron weighted by conservation
YBX1_v2.I_5p	Motif score of YBX1 in 5'-intron
YBX1_v2.I_5p.withCons	Motif score of YBX1 in 5'-intron weighted by conservation
YBX1_v2.E1	Motif score of YBX1 in E1
YBX1_v2.E2	Motif score of YBX1 in E2
CELF6.I_3p	Motif score of CELF6 in 3'-intron
CELF6.I_3p.withCons	Motif score of CELF6 in 3'-intron weighted by conservation
CELF6.I_5p	Motif score of CELF6 in 5'-intron
CELF6.I_5p.withCons	Motif score of CELF6 in 5'-intron weighted by conservation
CELF6.E1	Motif score of CELF6 in E1
CELF6.E2	Motif score of CELF6 in E2
SRSF1_v4.I_3p	Motif score of SRSF1 in 3'-intron
SRSF1_v4.I_3p.withCons	Motif score of SRSF1 in 3'-intron weighted by conservation
SRSF1_v4.I_5p	Motif score of SRSF1 in 5'-intron
SRSF1_v4.I_5p.withCons	Motif score of SRSF1 in 5'-intron weighted by conservation
SRSF1_v4.E1	Motif score of SRSF1 in E1
SRSF1_v4.E2	Motif score of SRSF1 in E2
HNRNPH2.I_3p	Motif score of HNRNPH2 in 3'-intron
HNRNPH2.I_3p.withCons	Motif score of HNRNPH2 in 3'-intron weighted by conservation
HNRNPH2.I_5p	Motif score of HNRNPH2 in 5'-intron
HNRNPH2.I_5p.withCons	Motif score of HNRNPH2 in 5'-intron weighted by conservation
HNRNPH2.E1	Motif score of HNRNPH2 in E1
HNRNPH2.E2	Motif score of HNRNPH2 in E2
RBM8A.I_3p	Motif score of RBM8A in 3'-intron
RBM8A.I_3p.withCons	Motif score of RBM8A in 3'-intron weighted by conservation
RBM8A.I_5p	Motif score of RBM8A in 5'-intron
RBM8A.I_5p.withCons	Motif score of RBM8A in 5'-intron weighted by conservation
RBM8A.E1	Motif score of RBM8A in E1
RBM8A.E2	Motif score of RBM8A in E2
MSI1_v1.I_3p	Motif score of MSI1 in 3'-intron
MSI1_v1.I_3p.withCons	Motif score of MSI1 in 3'-intron weighted by conservation
MSI1_v1.I_5p	Motif score of MSI1 in 5'-intron
MSI1_v1.I_5p.withCons	Motif score of MSI1 in 5'-intron weighted by conservation
MSI1_v1.E1	Motif score of MSI1 in E1
MSI1_v1.E2	Motif score of MSI1 in E2
PABPC5.I_3p	Motif score of PABPC5 in 3'-intron
PABPC5.I_3p.withCons	Motif score of PABPC5 in 3'-intron weighted by conservation
PABPC5.I_5p	Motif score of PABPC5 in 5'-intron
PABPC5.I_5p.withCons	Motif score of PABPC5 in 5'-intron weighted by conservation
PABPC5.E1	Motif score of PABPC5 in E1
PABPC5.E2	Motif score of PABPC5 in E2
TARDBP.I_3p	Motif score of TARDBP in 3'-intron
TARDBP.I_3p.withCons	Motif score of TARDBP in 3'-intron weighted by conservation
TARDBP.I_5p	Motif score of TARDBP in 5'-intron
TARDBP.I_5p.withCons	Motif score of TARDBP in 5'-intron weighted by conservation
TARDBP.E1	Motif score of TARDBP in E1
TARDBP.E2	Motif score of TARDBP in E2
HNRNPC.I_3p	Motif score of HNRNPC in 3'-intron
HNRNPC.I_3p.withCons	Motif score of HNRNPC in 3'-intron weighted by conservation
HNRNPC.I_5p	Motif score of HNRNPC in 5'-intron
HNRNPC.I_5p.withCons	Motif score of HNRNPC in 5'-intron weighted by conservation
HNRNPC.E1	Motif score of HNRNPC in E1
HNRNPC.E2	Motif score of HNRNPC in E2
SRSF2.I_3p	Motif score of SRSF2 in 3'-intron
SRSF2.I_3p.withCons	Motif score of SRSF2 in 3'-intron weighted by conservation
SRSF2.I_5p	Motif score of SRSF2 in 5'-intron
SRSF2.I_5p.withCons	Motif score of SRSF2 in 5'-intron weighted by conservation
SRSF2.E1	Motif score of SRSF2 in E1
SRSF2.E2	Motif score of SRSF2 in E2
ZC3H14.I_3p	Motif score of ZC3H14 in 3'-intron
ZC3H14.I_3p.withCons	Motif score of ZC3H14 in 3'-intron weighted by conservation
ZC3H14.I_5p	Motif score of ZC3H14 in 5'-intron
ZC3H14.I_5p.withCons	Motif score of ZC3H14 in 5'-intron weighted by conservation
ZC3H14.E1	Motif score of ZC3H14 in E1
ZC3H14.E2	Motif score of ZC3H14 in E2
KHDRBS1.I_3p	Motif score of KHDRBS1 in 3'-intron
KHDRBS1.I_3p.withCons	Motif score of KHDRBS1 in 3'-intron weighted by conservation
KHDRBS1.I_5p	Motif score of KHDRBS1 in 5'-intron
KHDRBS1.I_5p.withCons	Motif score of KHDRBS1 in 5'-intron weighted by conservation
KHDRBS1.E1	Motif score of KHDRBS1 in E1
KHDRBS1.E2	Motif score of KHDRBS1 in E2
ZCRB1.I_3p	Motif score of ZCRB1 in 3'-intron
ZCRB1.I_3p.withCons	Motif score of ZCRB1 in 3'-intron weighted by conservation
ZCRB1.I_5p	Motif score of ZCRB1 in 5'-intron
ZCRB1.I_5p.withCons	Motif score of ZCRB1 in 5'-intron weighted by conservation
ZCRB1.E1	Motif score of ZCRB1 in E1
ZCRB1.E2	Motif score of ZCRB1 in E2
SART3.I_3p	Motif score of SART3 in 3'-intron
SART3.I_3p.withCons	Motif score of SART3 in 3'-intron weighted by conservation
SART3.I_5p	Motif score of SART3 in 5'-intron
SART3.I_5p.withCons	Motif score of SART3 in 5'-intron weighted by conservation
SART3.E1	Motif score of SART3 in E1
SART3.E2	Motif score of SART3 in E2
ZC3H10.I_3p	Motif score of ZC3H10 in 3'-intron
ZC3H10.I_3p.withCons	Motif score of ZC3H10 in 3'-intron weighted by conservation
ZC3H10.I_5p	Motif score of ZC3H10 in 5'-intron
ZC3H10.I_5p.withCons	Motif score of ZC3H10 in 5'-intron weighted by conservation
ZC3H10.E1	Motif score of ZC3H10 in E1
ZC3H10.E2	Motif score of ZC3H10 in E2
FXR2.I_3p	Motif score of FXR2 in 3'-intron
FXR2.I_3p.withCons	Motif score of FXR2 in 3'-intron weighted by conservation
FXR2.I_5p	Motif score of FXR2 in 5'-intron
FXR2.I_5p.withCons	Motif score of FXR2 in 5'-intron weighted by conservation
FXR2.E1	Motif score of FXR2 in E1
FXR2.E2	Motif score of FXR2 in E2
RBM42.I_3p	Motif score of RBM42 in 3'-intron
RBM42.I_3p.withCons	Motif score of RBM42 in 3'-intron weighted by conservation
RBM42.I_5p	Motif score of RBM42 in 5'-intron
RBM42.I_5p.withCons	Motif score of RBM42 in 5'-intron weighted by conservation
RBM42.E1	Motif score of RBM42 in E1
RBM42.E2	Motif score of RBM42 in E2
SNRNP70.I_3p	Motif score of SNRNP70 in 3'-intron
SNRNP70.I_3p.withCons	Motif score of SNRNP70 in 3'-intron weighted by conservation
SNRNP70.I_5p	Motif score of SNRNP70 in 5'-intron
SNRNP70.I_5p.withCons	Motif score of SNRNP70 in 5'-intron weighted by conservation
SNRNP70.E1	Motif score of SNRNP70 in E1
SNRNP70.E2	Motif score of SNRNP70 in E2
KHDRBS3.I_3p	Motif score of KHDRBS3 in 3'-intron
KHDRBS3.I_3p.withCons	Motif score of KHDRBS3 in 3'-intron weighted by conservation
KHDRBS3.I_5p	Motif score of KHDRBS3 in 5'-intron
KHDRBS3.I_5p.withCons	Motif score of KHDRBS3 in 5'-intron weighted by conservation
KHDRBS3.E1	Motif score of KHDRBS3 in E1
KHDRBS3.E2	Motif score of KHDRBS3 in E2
RBFOX1.I_3p	Motif score of RBFOX1 in 3'-intron
RBFOX1.I_3p.withCons	Motif score of RBFOX1 in 3'-intron weighted by conservation
RBFOX1.I_5p	Motif score of RBFOX1 in 5'-intron
RBFOX1.I_5p.withCons	Motif score of RBFOX1 in 5'-intron weighted by conservation
RBFOX1.E1	Motif score of RBFOX1 in E1
RBFOX1.E2	Motif score of RBFOX1 in E2
MBNL1.I_3p	Motif score of MBNL1 in 3'-intron
MBNL1.I_3p.withCons	Motif score of MBNL1 in 3'-intron weighted by conservation
MBNL1.I_5p	Motif score of MBNL1 in 5'-intron
MBNL1.I_5p.withCons	Motif score of MBNL1 in 5'-intron weighted by conservation
MBNL1.E1	Motif score of MBNL1 in E1
MBNL1.E2	Motif score of MBNL1 in E2
SRSF1_v2.I_3p	Motif score of SRSF1 in 3'-intron
SRSF1_v2.I_3p.withCons	Motif score of SRSF1 in 3'-intron weighted by conservation
SRSF1_v2.I_5p	Motif score of SRSF1 in 5'-intron
SRSF1_v2.I_5p.withCons	Motif score of SRSF1 in 5'-intron weighted by conservation
SRSF1_v2.E1	Motif score of SRSF1 in E1
SRSF1_v2.E2	Motif score of SRSF1 in E2
SRSF1_v6.I_3p	Motif score of SRSF1 in 3'-intron
SRSF1_v6.I_3p.withCons	Motif score of SRSF1 in 3'-intron weighted by conservation
SRSF1_v6.I_5p	Motif score of SRSF1 in 5'-intron
SRSF1_v6.I_5p.withCons	Motif score of SRSF1 in 5'-intron weighted by conservation
SRSF1_v6.E1	Motif score of SRSF1 in E1
SRSF1_v6.E2	Motif score of SRSF1 in E2
ELAVL1_v1.I_3p	Motif score of ELAVL1 in 3'-intron
ELAVL1_v1.I_3p.withCons	Motif score of ELAVL1 in 3'-intron weighted by conservation
ELAVL1_v1.I_5p	Motif score of ELAVL1 in 5'-intron
ELAVL1_v1.I_5p.withCons	Motif score of ELAVL1 in 5'-intron weighted by conservation
ELAVL1_v1.E1	Motif score of ELAVL1 in E1
ELAVL1_v1.E2	Motif score of ELAVL1 in E2
SRSF10_v1.I_3p	Motif score of SRSF10 in 3'-intron
SRSF10_v1.I_3p.withCons	Motif score of SRSF10 in 3'-intron weighted by conservation
SRSF10_v1.I_5p	Motif score of SRSF10 in 5'-intron
SRSF10_v1.I_5p.withCons	Motif score of SRSF10 in 5'-intron weighted by conservation
SRSF10_v1.E1	Motif score of SRSF10 in E1
SRSF10_v1.E2	Motif score of SRSF10 in E2
CELF5.I_3p	Motif score of CELF5 in 3'-intron
CELF5.I_3p.withCons	Motif score of CELF5 in 3'-intron weighted by conservation
CELF5.I_5p	Motif score of CELF5 in 5'-intron
CELF5.I_5p.withCons	Motif score of CELF5 in 5'-intron weighted by conservation
CELF5.E1	Motif score of CELF5 in E1
CELF5.E2	Motif score of CELF5 in E2
ELAVL1_v2.I_3p	Motif score of ELAVL1 in 3'-intron
ELAVL1_v2.I_3p.withCons	Motif score of ELAVL1 in 3'-intron weighted by conservation
ELAVL1_v2.I_5p	Motif score of ELAVL1 in 5'-intron
ELAVL1_v2.I_5p.withCons	Motif score of ELAVL1 in 5'-intron weighted by conservation
ELAVL1_v2.E1	Motif score of ELAVL1 in E1
ELAVL1_v2.E2	Motif score of ELAVL1 in E2
ZNF638.I_3p	Motif score of ZNF638 in 3'-intron
ZNF638.I_3p.withCons	Motif score of ZNF638 in 3'-intron weighted by conservation
ZNF638.I_5p	Motif score of ZNF638 in 5'-intron
ZNF638.I_5p.withCons	Motif score of ZNF638 in 5'-intron weighted by conservation
ZNF638.E1	Motif score of ZNF638 in E1
ZNF638.E2	Motif score of ZNF638 in E2
RBM5_v1.I_3p	Motif score of RBM5 in 3'-intron
RBM5_v1.I_3p.withCons	Motif score of RBM5 in 3'-intron weighted by conservation
RBM5_v1.I_5p	Motif score of RBM5 in 5'-intron
RBM5_v1.I_5p.withCons	Motif score of RBM5 in 5'-intron weighted by conservation
RBM5_v1.E1	Motif score of RBM5 in E1
RBM5_v1.E2	Motif score of RBM5 in E2
ESRP2.I_3p	Motif score of ESRP2 in 3'-intron
ESRP2.I_3p.withCons	Motif score of ESRP2 in 3'-intron weighted by conservation
ESRP2.I_5p	Motif score of ESRP2 in 5'-intron
ESRP2.I_5p.withCons	Motif score of ESRP2 in 5'-intron weighted by conservation
ESRP2.E1	Motif score of ESRP2 in E1
ESRP2.E2	Motif score of ESRP2 in E2
PABPC4.I_3p	Motif score of PABPC4 in 3'-intron
PABPC4.I_3p.withCons	Motif score of PABPC4 in 3'-intron weighted by conservation
PABPC4.I_5p	Motif score of PABPC4 in 5'-intron
PABPC4.I_5p.withCons	Motif score of PABPC4 in 5'-intron weighted by conservation
PABPC4.E1	Motif score of PABPC4 in E1
PABPC4.E2	Motif score of PABPC4 in E2
PABPN1.I_3p	Motif score of PABPN1 in 3'-intron
PABPN1.I_3p.withCons	Motif score of PABPN1 in 3'-intron weighted by conservation
PABPN1.I_5p	Motif score of PABPN1 in 5'-intron
PABPN1.I_5p.withCons	Motif score of PABPN1 in 5'-intron weighted by conservation
PABPN1.E1	Motif score of PABPN1 in E1
PABPN1.E2	Motif score of PABPN1 in E2
SRSF1_v5.I_3p	Motif score of SRSF1 in 3'-intron
SRSF1_v5.I_3p.withCons	Motif score of SRSF1 in 3'-intron weighted by conservation
SRSF1_v5.I_5p	Motif score of SRSF1 in 5'-intron
SRSF1_v5.I_5p.withCons	Motif score of SRSF1 in 5'-intron weighted by conservation
SRSF1_v5.E1	Motif score of SRSF1 in E1
SRSF1_v5.E2	Motif score of SRSF1 in E2
IGF2BP2.I_3p	Motif score of IGF2BP2 in 3'-intron
IGF2BP2.I_3p.withCons	Motif score of IGF2BP2 in 3'-intron weighted by conservation
IGF2BP2.I_5p	Motif score of IGF2BP2 in 5'-intron
IGF2BP2.I_5p.withCons	Motif score of IGF2BP2 in 5'-intron weighted by conservation
IGF2BP2.E1	Motif score of IGF2BP2 in E1
IGF2BP2.E2	Motif score of IGF2BP2 in E2
RBM24.I_3p	Motif score of RBM24 in 3'-intron
RBM24.I_3p.withCons	Motif score of RBM24 in 3'-intron weighted by conservation
RBM24.I_5p	Motif score of RBM24 in 5'-intron
RBM24.I_5p.withCons	Motif score of RBM24 in 5'-intron weighted by conservation
RBM24.E1	Motif score of RBM24 in E1
RBM24.E2	Motif score of RBM24 in E2
RBM6.I_3p	Motif score of RBM6 in 3'-intron
RBM6.I_3p.withCons	Motif score of RBM6 in 3'-intron weighted by conservation
RBM6.I_5p	Motif score of RBM6 in 5'-intron
RBM6.I_5p.withCons	Motif score of RBM6 in 5'-intron weighted by conservation
RBM6.E1	Motif score of RBM6 in E1
RBM6.E2	Motif score of RBM6 in E2
SRSF7.I_3p	Motif score of SRSF7 in 3'-intron
SRSF7.I_3p.withCons	Motif score of SRSF7 in 3'-intron weighted by conservation
SRSF7.I_5p	Motif score of SRSF7 in 5'-intron
SRSF7.I_5p.withCons	Motif score of SRSF7 in 5'-intron weighted by conservation
SRSF7.E1	Motif score of SRSF7 in E1
SRSF7.E2	Motif score of SRSF7 in E2
PTBP1_v1.I_3p	Motif score of PTBP1 in 3'-intron
PTBP1_v1.I_3p.withCons	Motif score of PTBP1 in 3'-intron weighted by conservation
PTBP1_v1.I_5p	Motif score of PTBP1 in 5'-intron
PTBP1_v1.I_5p.withCons	Motif score of PTBP1 in 5'-intron weighted by conservation
PTBP1_v1.E1	Motif score of PTBP1 in E1
PTBP1_v1.E2	Motif score of PTBP1 in E2
ENOX1.I_3p	Motif score of ENOX1 in 3'-intron
ENOX1.I_3p.withCons	Motif score of ENOX1 in 3'-intron weighted by conservation
ENOX1.I_5p	Motif score of ENOX1 in 5'-intron
ENOX1.I_5p.withCons	Motif score of ENOX1 in 5'-intron weighted by conservation
ENOX1.E1	Motif score of ENOX1 in E1
ENOX1.E2	Motif score of ENOX1 in E2
RBM5_v2.I_3p	Motif score of RBM5 in 3'-intron
RBM5_v2.I_3p.withCons	Motif score of RBM5 in 3'-intron weighted by conservation
RBM5_v2.I_5p	Motif score of RBM5 in 5'-intron
RBM5_v2.I_5p.withCons	Motif score of RBM5 in 5'-intron weighted by conservation
RBM5_v2.E1	Motif score of RBM5 in E1
RBM5_v2.E2	Motif score of RBM5 in E2
IGF2BP3.I_3p	Motif score of IGF2BP3 in 3'-intron
IGF2BP3.I_3p.withCons	Motif score of IGF2BP3 in 3'-intron weighted by conservation
IGF2BP3.I_5p	Motif score of IGF2BP3 in 5'-intron
IGF2BP3.I_5p.withCons	Motif score of IGF2BP3 in 5'-intron weighted by conservation
IGF2BP3.E1	Motif score of IGF2BP3 in E1
IGF2BP3.E2	Motif score of IGF2BP3 in E2
TIA1_v1.I_3p	Motif score of TIA1 in 3'-intron
TIA1_v1.I_3p.withCons	Motif score of TIA1 in 3'-intron weighted by conservation
TIA1_v1.I_5p	Motif score of TIA1 in 5'-intron
TIA1_v1.I_5p.withCons	Motif score of TIA1 in 5'-intron weighted by conservation
TIA1_v1.E1	Motif score of TIA1 in E1
TIA1_v1.E2	Motif score of TIA1 in E2
ELAVL1_v5.I_3p	Motif score of ELAVL1 in 3'-intron
ELAVL1_v5.I_3p.withCons	Motif score of ELAVL1 in 3'-intron weighted by conservation
ELAVL1_v5.I_5p	Motif score of ELAVL1 in 5'-intron
ELAVL1_v5.I_5p.withCons	Motif score of ELAVL1 in 5'-intron weighted by conservation
ELAVL1_v5.E1	Motif score of ELAVL1 in E1
ELAVL1_v5.E2	Motif score of ELAVL1 in E2
SRSF1_v1.I_3p	Motif score of SRSF1 in 3'-intron
SRSF1_v1.I_3p.withCons	Motif score of SRSF1 in 3'-intron weighted by conservation
SRSF1_v1.I_5p	Motif score of SRSF1 in 5'-intron
SRSF1_v1.I_5p.withCons	Motif score of SRSF1 in 5'-intron weighted by conservation
SRSF1_v1.E1	Motif score of SRSF1 in E1
SRSF1_v1.E2	Motif score of SRSF1 in E2
YBX2.I_3p	Motif score of YBX2 in 3'-intron
YBX2.I_3p.withCons	Motif score of YBX2 in 3'-intron weighted by conservation
YBX2.I_5p	Motif score of YBX2 in 5'-intron
YBX2.I_5p.withCons	Motif score of YBX2 in 5'-intron weighted by conservation
YBX2.E1	Motif score of YBX2 in E1
YBX2.E2	Motif score of YBX2 in E2
RBM3.I_3p	Motif score of RBM3 in 3'-intron
RBM3.I_3p.withCons	Motif score of RBM3 in 3'-intron weighted by conservation
RBM3.I_5p	Motif score of RBM3 in 5'-intron
RBM3.I_5p.withCons	Motif score of RBM3 in 5'-intron weighted by conservation
RBM3.E1	Motif score of RBM3 in E1
RBM3.E2	Motif score of RBM3 in E2
HNRNPL_v1.I_3p	Motif score of HNRNPL in 3'-intron
HNRNPL_v1.I_3p.withCons	Motif score of HNRNPL in 3'-intron weighted by conservation
HNRNPL_v1.I_5p	Motif score of HNRNPL in 5'-intron
HNRNPL_v1.I_5p.withCons	Motif score of HNRNPL in 5'-intron weighted by conservation
HNRNPL_v1.E1	Motif score of HNRNPL in E1
HNRNPL_v1.E2	Motif score of HNRNPL in E2
HNRNPK.I_3p	Motif score of HNRNPK in 3'-intron
HNRNPK.I_3p.withCons	Motif score of HNRNPK in 3'-intron weighted by conservation
HNRNPK.I_5p	Motif score of HNRNPK in 5'-intron
HNRNPK.I_5p.withCons	Motif score of HNRNPK in 5'-intron weighted by conservation
HNRNPK.E1	Motif score of HNRNPK in E1
HNRNPK.E2	Motif score of HNRNPK in E2
DAZAP1.I_3p	Motif score of DAZAP1 in 3'-intron
DAZAP1.I_3p.withCons	Motif score of DAZAP1 in 3'-intron weighted by conservation
DAZAP1.I_5p	Motif score of DAZAP1 in 5'-intron
DAZAP1.I_5p.withCons	Motif score of DAZAP1 in 5'-intron weighted by conservation
DAZAP1.E1	Motif score of DAZAP1 in E1
DAZAP1.E2	Motif score of DAZAP1 in E2
PABPC3.I_3p	Motif score of PABPC3 in 3'-intron
PABPC3.I_3p.withCons	Motif score of PABPC3 in 3'-intron weighted by conservation
PABPC3.I_5p	Motif score of PABPC3 in 5'-intron
PABPC3.I_5p.withCons	Motif score of PABPC3 in 5'-intron weighted by conservation
PABPC3.E1	Motif score of PABPC3 in E1
PABPC3.E2	Motif score of PABPC3 in E2
RBMS3_v2.I_3p	Motif score of RBMS3 in 3'-intron
RBMS3_v2.I_3p.withCons	Motif score of RBMS3 in 3'-intron weighted by conservation
RBMS3_v2.I_5p	Motif score of RBMS3 in 5'-intron
RBMS3_v2.I_5p.withCons	Motif score of RBMS3 in 5'-intron weighted by conservation
RBMS3_v2.E1	Motif score of RBMS3 in E1
RBMS3_v2.E2	Motif score of RBMS3 in E2
SRSF10_v4.I_3p	Motif score of SRSF10 in 3'-intron
SRSF10_v4.I_3p.withCons	Motif score of SRSF10 in 3'-intron weighted by conservation
SRSF10_v4.I_5p	Motif score of SRSF10 in 5'-intron
SRSF10_v4.I_5p.withCons	Motif score of SRSF10 in 5'-intron weighted by conservation
SRSF10_v4.E1	Motif score of SRSF10 in E1
SRSF10_v4.E2	Motif score of SRSF10 in E2
SRSF10_v3.I_3p	Motif score of SRSF10 in 3'-intron
SRSF10_v3.I_3p.withCons	Motif score of SRSF10 in 3'-intron weighted by conservation
SRSF10_v3.I_5p	Motif score of SRSF10 in 5'-intron
SRSF10_v3.I_5p.withCons	Motif score of SRSF10 in 5'-intron weighted by conservation
SRSF10_v3.E1	Motif score of SRSF10 in E1
SRSF10_v3.E2	Motif score of SRSF10 in E2
RBM28.I_3p	Motif score of RBM28 in 3'-intron
RBM28.I_3p.withCons	Motif score of RBM28 in 3'-intron weighted by conservation
RBM28.I_5p	Motif score of RBM28 in 5'-intron
RBM28.I_5p.withCons	Motif score of RBM28 in 5'-intron weighted by conservation
RBM28.E1	Motif score of RBM28 in E1
RBM28.E2	Motif score of RBM28 in E2
RBM46.I_3p	Motif score of RBM46 in 3'-intron
RBM46.I_3p.withCons	Motif score of RBM46 in 3'-intron weighted by conservation
RBM46.I_5p	Motif score of RBM46 in 5'-intron
RBM46.I_5p.withCons	Motif score of RBM46 in 5'-intron weighted by conservation
RBM46.E1	Motif score of RBM46 in E1
RBM46.E2	Motif score of RBM46 in E2
MATR3.I_3p	Motif score of MATR3 in 3'-intron
MATR3.I_3p.withCons	Motif score of MATR3 in 3'-intron weighted by conservation
MATR3.I_5p	Motif score of MATR3 in 5'-intron
MATR3.I_5p.withCons	Motif score of MATR3 in 5'-intron weighted by conservation
MATR3.E1	Motif score of MATR3 in E1
MATR3.E2	Motif score of MATR3 in E2
CPEB4.I_3p	Motif score of CPEB4 in 3'-intron
CPEB4.I_3p.withCons	Motif score of CPEB4 in 3'-intron weighted by conservation
CPEB4.I_5p	Motif score of CPEB4 in 5'-intron
CPEB4.I_5p.withCons	Motif score of CPEB4 in 5'-intron weighted by conservation
CPEB4.E1	Motif score of CPEB4 in E1
CPEB4.E2	Motif score of CPEB4 in E2
PCBP2.I_3p	Motif score of PCBP2 in 3'-intron
PCBP2.I_3p.withCons	Motif score of PCBP2 in 3'-intron weighted by conservation
PCBP2.I_5p	Motif score of PCBP2 in 5'-intron
PCBP2.I_5p.withCons	Motif score of PCBP2 in 5'-intron weighted by conservation
PCBP2.E1	Motif score of PCBP2 in E1
PCBP2.E2	Motif score of PCBP2 in E2
RBMS3_v1.I_3p	Motif score of RBMS3 in 3'-intron
RBMS3_v1.I_3p.withCons	Motif score of RBMS3 in 3'-intron weighted by conservation
RBMS3_v1.I_5p	Motif score of RBMS3 in 5'-intron
RBMS3_v1.I_5p.withCons	Motif score of RBMS3 in 5'-intron weighted by conservation
RBMS3_v1.E1	Motif score of RBMS3 in E1
RBMS3_v1.E2	Motif score of RBMS3 in E2
LIN28A_v1.I_3p	Motif score of LIN28A in 3'-intron
LIN28A_v1.I_3p.withCons	Motif score of LIN28A in 3'-intron weighted by conservation
LIN28A_v1.I_5p	Motif score of LIN28A in 5'-intron
LIN28A_v1.I_5p.withCons	Motif score of LIN28A in 5'-intron weighted by conservation
LIN28A_v1.E1	Motif score of LIN28A in E1
LIN28A_v1.E2	Motif score of LIN28A in E2
SRSF9_v2.I_3p	Motif score of SRSF9 in 3'-intron
SRSF9_v2.I_3p.withCons	Motif score of SRSF9 in 3'-intron weighted by conservation
SRSF9_v2.I_5p	Motif score of SRSF9 in 5'-intron
SRSF9_v2.I_5p.withCons	Motif score of SRSF9 in 5'-intron weighted by conservation
SRSF9_v2.E1	Motif score of SRSF9 in E1
SRSF9_v2.E2	Motif score of SRSF9 in E2
HNRNPL_v2.I_3p	Motif score of HNRNPL in 3'-intron
HNRNPL_v2.I_3p.withCons	Motif score of HNRNPL in 3'-intron weighted by conservation
HNRNPL_v2.I_5p	Motif score of HNRNPL in 5'-intron
HNRNPL_v2.I_5p.withCons	Motif score of HNRNPL in 5'-intron weighted by conservation
HNRNPL_v2.E1	Motif score of HNRNPL in E1
HNRNPL_v2.E2	Motif score of HNRNPL in E2
FUS.I_3p	Motif score of FUS in 3'-intron
FUS.I_3p.withCons	Motif score of FUS in 3'-intron weighted by conservation
FUS.I_5p	Motif score of FUS in 5'-intron
FUS.I_5p.withCons	Motif score of FUS in 5'-intron weighted by conservation
FUS.E1	Motif score of FUS in E1
FUS.E2	Motif score of FUS in E2
RBM4_v1.I_3p	Motif score of RBM4 in 3'-intron
RBM4_v1.I_3p.withCons	Motif score of RBM4 in 3'-intron weighted by conservation
RBM4_v1.I_5p	Motif score of RBM4 in 5'-intron
RBM4_v1.I_5p.withCons	Motif score of RBM4 in 5'-intron weighted by conservation
RBM4_v1.E1	Motif score of RBM4 in E1
RBM4_v1.E2	Motif score of RBM4 in E2
SAMD4A.I_3p	Motif score of SAMD4A in 3'-intron
SAMD4A.I_3p.withCons	Motif score of SAMD4A in 3'-intron weighted by conservation
SAMD4A.I_5p	Motif score of SAMD4A in 5'-intron
SAMD4A.I_5p.withCons	Motif score of SAMD4A in 5'-intron weighted by conservation
SAMD4A.E1	Motif score of SAMD4A in E1
SAMD4A.E2	Motif score of SAMD4A in E2
MSI1_v2.I_3p	Motif score of MSI1 in 3'-intron
MSI1_v2.I_3p.withCons	Motif score of MSI1 in 3'-intron weighted by conservation
MSI1_v2.I_5p	Motif score of MSI1 in 5'-intron
MSI1_v2.I_5p.withCons	Motif score of MSI1 in 5'-intron weighted by conservation
MSI1_v2.E1	Motif score of MSI1 in E1
MSI1_v2.E2	Motif score of MSI1 in E2
FXR1.I_3p	Motif score of FXR1 in 3'-intron
FXR1.I_3p.withCons	Motif score of FXR1 in 3'-intron weighted by conservation
FXR1.I_5p	Motif score of FXR1 in 5'-intron
FXR1.I_5p.withCons	Motif score of FXR1 in 5'-intron weighted by conservation
FXR1.E1	Motif score of FXR1 in E1
FXR1.E2	Motif score of FXR1 in E2
ELAVL1_v3.I_3p	Motif score of ELAVL1 in 3'-intron
ELAVL1_v3.I_3p.withCons	Motif score of ELAVL1 in 3'-intron weighted by conservation
ELAVL1_v3.I_5p	Motif score of ELAVL1 in 5'-intron
ELAVL1_v3.I_5p.withCons	Motif score of ELAVL1 in 5'-intron weighted by conservation
ELAVL1_v3.E1	Motif score of ELAVL1 in E1
ELAVL1_v3.E2	Motif score of ELAVL1 in E2
FMR1.I_3p	Motif score of FMR1 in 3'-intron
FMR1.I_3p.withCons	Motif score of FMR1 in 3'-intron weighted by conservation
FMR1.I_5p	Motif score of FMR1 in 5'-intron
FMR1.I_5p.withCons	Motif score of FMR1 in 5'-intron weighted by conservation
FMR1.E1	Motif score of FMR1 in E1
FMR1.E2	Motif score of FMR1 in E2
CNOT4.I_3p	Motif score of CNOT4 in 3'-intron
CNOT4.I_3p.withCons	Motif score of CNOT4 in 3'-intron weighted by conservation
CNOT4.I_5p	Motif score of CNOT4 in 5'-intron
CNOT4.I_5p.withCons	Motif score of CNOT4 in 5'-intron weighted by conservation
CNOT4.E1	Motif score of CNOT4 in E1
CNOT4.E2	Motif score of CNOT4 in E2
HNRNPCL1.I_3p	Motif score of HNRNPCL1 in 3'-intron
HNRNPCL1.I_3p.withCons	Motif score of HNRNPCL1 in 3'-intron weighted by conservation
HNRNPCL1.I_5p	Motif score of HNRNPCL1 in 5'-intron
HNRNPCL1.I_5p.withCons	Motif score of HNRNPCL1 in 5'-intron weighted by conservation
HNRNPCL1.E1	Motif score of HNRNPCL1 in E1
HNRNPCL1.E2	Motif score of HNRNPCL1 in E2
RBM4_v2.I_3p	Motif score of RBM4 in 3'-intron
RBM4_v2.I_3p.withCons	Motif score of RBM4 in 3'-intron weighted by conservation
RBM4_v2.I_5p	Motif score of RBM4 in 5'-intron
RBM4_v2.I_5p.withCons	Motif score of RBM4 in 5'-intron weighted by conservation
RBM4_v2.E1	Motif score of RBM4 in E1
RBM4_v2.E2	Motif score of RBM4 in E2
PCBP1.I_3p	Motif score of PCBP1 in 3'-intron
PCBP1.I_3p.withCons	Motif score of PCBP1 in 3'-intron weighted by conservation
PCBP1.I_5p	Motif score of PCBP1 in 5'-intron
PCBP1.I_5p.withCons	Motif score of PCBP1 in 5'-intron weighted by conservation
PCBP1.E1	Motif score of PCBP1 in E1
PCBP1.E2	Motif score of PCBP1 in E2
YBX1_v1.I_3p	Motif score of YBX1 in 3'-intron
YBX1_v1.I_3p.withCons	Motif score of YBX1 in 3'-intron weighted by conservation
YBX1_v1.I_5p	Motif score of YBX1 in 5'-intron
YBX1_v1.I_5p.withCons	Motif score of YBX1 in 5'-intron weighted by conservation
YBX1_v1.E1	Motif score of YBX1 in E1
YBX1_v1.E2	Motif score of YBX1 in E2
SRSF10_v2.I_3p	Motif score of SRSF10 in 3'-intron
SRSF10_v2.I_3p.withCons	Motif score of SRSF10 in 3'-intron weighted by conservation
SRSF10_v2.I_5p	Motif score of SRSF10 in 5'-intron
SRSF10_v2.I_5p.withCons	Motif score of SRSF10 in 5'-intron weighted by conservation
SRSF10_v2.E1	Motif score of SRSF10 in E1
SRSF10_v2.E2	Motif score of SRSF10 in E2
PPRC1.I_3p	Motif score of PPRC1 in 3'-intron
PPRC1.I_3p.withCons	Motif score of PPRC1 in 3'-intron weighted by conservation
PPRC1.I_5p	Motif score of PPRC1 in 5'-intron
PPRC1.I_5p.withCons	Motif score of PPRC1 in 5'-intron weighted by conservation
PPRC1.E1	Motif score of PPRC1 in E1
PPRC1.E2	Motif score of PPRC1 in E2
ANKHD1.I_3p	Motif score of ANKHD1 in 3'-intron
ANKHD1.I_3p.withCons	Motif score of ANKHD1 in 3'-intron weighted by conservation
ANKHD1.I_5p	Motif score of ANKHD1 in 5'-intron
ANKHD1.I_5p.withCons	Motif score of ANKHD1 in 5'-intron weighted by conservation
ANKHD1.E1	Motif score of ANKHD1 in E1
ANKHD1.E2	Motif score of ANKHD1 in E2
TIA1_v2.I_3p	Motif score of TIA1 in 3'-intron
TIA1_v2.I_3p.withCons	Motif score of TIA1 in 3'-intron weighted by conservation
TIA1_v2.I_5p	Motif score of TIA1 in 5'-intron
TIA1_v2.I_5p.withCons	Motif score of TIA1 in 5'-intron weighted by conservation
TIA1_v2.E1	Motif score of TIA1 in E1
TIA1_v2.E2	Motif score of TIA1 in E2
LIN28A_v2.I_3p	Motif score of LIN28A in 3'-intron
LIN28A_v2.I_3p.withCons	Motif score of LIN28A in 3'-intron weighted by conservation
LIN28A_v2.I_5p	Motif score of LIN28A in 5'-intron
LIN28A_v2.I_5p.withCons	Motif score of LIN28A in 5'-intron weighted by conservation
LIN28A_v2.E1	Motif score of LIN28A in E1
LIN28A_v2.E2	Motif score of LIN28A in E2
U2AF2.I_3p	Motif score of U2AF2 in 3'-intron
U2AF2.I_3p.withCons	Motif score of U2AF2 in 3'-intron weighted by conservation
U2AF2.I_5p	Motif score of U2AF2 in 5'-intron
U2AF2.I_5p.withCons	Motif score of U2AF2 in 5'-intron weighted by conservation
U2AF2.E1	Motif score of U2AF2 in E1
U2AF2.E2	Motif score of U2AF2 in E2
ESE.Burge.E1	ESE (exonic splicing enhancer) in E1 (Burge)
ESE.Burge.E2	ESE (exonic splicing enhancer) in E2 (Burge)
ESS.Burge.E1	ESS (exonic splicing silencer) in E1 (Burge)
ESS.Burge.E2	ESS (exonic splicing silencer) in E2 (Burge)
Cons.MeanP1|100.I_5p	Mean conservation score of first 100nt of 5'-intron
Cons.MeanP-100|-1.I_3p	Mean conservation score of first 100nt of 3'-intron

## Sheet: Table S4B. Top50_features
Supplemental Table S4B: Top 50 genomic features for distinguishing different groups of introns
Comparison between LIR and NCI			Comparison between CIR and NCI			Comparison between LIR and CIR
Features	strength		Features	strength		Features	strength
donor.maxent	0.0031543		donor.maxent	0.0110545		LogLenRatio.E2_I	0.00677507
LogLenRatio.E1_I	0.0031492		acceptor.maxent	0.00873592		LogLenRatio.E1_I	0.00565583
acceptor.maxent	0.00265842		Translatable.E1E2	0.00787065		Translatable.E2	0.00386438
LogLenRatio.E2_I	0.00232944		Cons.MeanP-100|-1.I_3p	0.00463433		intron_pos	0.00171176
LogLen.I	0.00111583		Cons.MeanP1|100.I_5p	0.00419996		Translatable.E1E2	0.00160626
Cons.MeanP1|100.I_5p	0.0010862		LogLen.E2	0.00105657		E1.GC	0.000946657
Cons.MeanP-100|-1.I_3p	0.00107382		RBM41.I_3p	0.000962745		LogLen.I	0.000775922
Translatable.E1E2	0.000520664		A1CF.I_5p	0.000763377		Translatable.E1	0.000753121
intron_pos	0.000490569		KHDRBS2.I_5p	0.000727505		ZC3H10.I_5p	0.000569478
ESS.Burge.E1	0.000236729		LogLen.I	0.000700966		3_ss.GC	0.000522408
Translatable.E2	0.000173503		YeoClustDown.AAATT.I_5p	0.000619684		E2.GC	0.00052063
E1.GC	0.000147715		YeoClustUp.TCTTT.I_3p	0.000617935		ShortSeq.TGC.I_3p	0.000473483
RBM3.I_5p	9.83617e-05		ShortSeq.TTT.I_3p	0.000599065		Translatable.I	0.000462431
ShortSeq.CAG.I_5p	9.82609e-05		YeoClustUp.TCTGA.I_3p	0.000591133		YeoClustDown.GTCTG.I_5p	0.000457175
E2.GC	9.76856e-05		LogLen.E1	0.000569084		TIA1_v2.I_3p	0.000409718
ShortSeq.GCC.I_3p	9.59952e-05		Translatable.E1	0.000558964		ESE.Burge.E2	0.000394801
ZC3H14.I_5p	8.94828e-05		RBM41.I_5p	0.000540766		ELAVL1_v1.I_5p	0.000388618
ShortSeq.CG.I_5p	8.53073e-05		ShortSeq.CTG.I_3p	0.000519534		ELAVL1_v5.I_5p	0.000381662
YeoClustDown.TAATG.I_5p	8.3783e-05		ELAVL1_v5.I_5p	0.000507198		YeoClustUp.TCTGA.I_3p	0.0003492
ShortSeq.TTT.I_3p	8.28518e-05		ShortSeq.ATT.I_5p	0.000497136		ShortSeq.CCA.I_3p	0.00034889
ShortSeq.ACT.I_5p	8.10429e-05		ZCRB1.I_5p	0.000496348		MBNL1.I_5p.withCons	0.000348118
ShortSeq.A.I_5p	7.72766e-05		MSI1_v1.I_3p	0.000482787		YeoClustDown.TGAGC.I_5p	0.000342243
YeoClustUp.GTGAG.I_3p	7.62031e-05		ShortSeq.AAG.I_3p	0.000468088		SAMD4A.I_5p	0.000340311
ESE.Burge.E1	7.51355e-05		YeoClustUp.TAATG.I_3p	0.000466017		PABPC4.I_5p	0.000337451
YeoClustUp.AATTG.I_3p	7.41034e-05		I_5p.GC	0.000452689		U2AF2.I_3p	0.000331345
ShortSeq.CTT.I_3p	7.22173e-05		YeoClustDown.TGCAT.I_5p	0.000449831		5_ss.GC	0.00032609
Translatable.E1	7.09244e-05		ShortSeq.GG.I_3p	0.000428804		YeoClustUp.TCTGG.I_3p	0.000318051
ShortSeq.AA.I_5p	6.98271e-05		FrameShift.I	0.000428279		CELF6.I_5p.withCons	0.000316274
ShortSeq.CTC.I_3p	6.33562e-05		5_ss.GC	0.000426121		ShortSeq.CGT.I_3p	0.000314805
TARDBP.I_5p.withCons	6.31012e-05		PABPC4.I_5p	0.000424925		RBM3.I_5p	0.000314032
YeoClustDown.TAAAAT.I_5p	6.16659e-05		RBMS3_v2.I_3p	0.0004209		ShortSeq.GCT.I_3p	0.000307076
FrameShift.I	6.07881e-05		YeoClustDown.TGAAAG.I_5p	0.000410926		PCBP1.I_5p	0.000297724
YeoClustUp.AGATTT.I_3p	6.04915e-05		YeoClustDown.AAAGA.I_5p	0.000388936		SRSF1_v5.I_3p	0.000297106
3_ss.GC	5.95485e-05		RBM46.I_5p.withCons	0.000381966		ShortSeq.CTA.I_5p	0.000293241
HNRNPA1L2.I_3p.withCons	5.91036e-05		SRSF1_v5.I_3p	0.000378845		ELAVL1_v4.I_3p	0.000292004
YBX1_v1.I_3p	5.84038e-05		FXR2.I_3p	0.00037762		Cons.MeanP1|100.I_5p	0.000292004
LogLen.E1	5.838e-05		ShortSeq.GA.I_5p	0.000374937		ZNF638.I_5p.withCons	0.000279174
ShortSeq.C.I_3p	5.77513e-05		ShortSeq.TGC.I_3p	0.00036925		ShortSeq.CGG.I_5p	0.000278401
SNRNP70.I_3p	5.75497e-05		ShortSeq.GCC.I_3p	0.00036575		HNRNPA1L2.I_3p	0.000273764
ShortSeq.CTG.I_3p	5.72828e-05		TIA1_v2.I_3p	0.000363913		SecStr.avgJunc_I_5p	0.000273145
YeoClustUp.TCTTT.I_3p	5.61203e-05		YeoClustUp.ATTCT.I_3p	0.000350089		ShortSeq.TTG.I_5p	0.000272604
ShortSeq.TTG.I_3p	5.55983e-05		ShortSeq.AGG.I_5p	0.000346239		YeoClustDown.TCTGA.I_5p	0.000271136
CELF4.I_5p	5.42876e-05		ELAVL1_v3.I_3p	0.000344781		RBM28.I_3p.withCons	0.000267735
MSI1_v1.I_5p	5.35818e-05		RBM3.I_3p	0.000337519		YeoClustDown.CAAAT.I_5p	0.000267117
TIA1_v1.I_3p	5.22591e-05		YeoClustUp.TCTGTT.I_3p	0.000337373		ShortSeq.TCG.I_5p	0.000265416
NucPos.occupAvg1|50.E2	5.19685e-05		ShortSeq.TA.I_3p	0.000336178		PCBP2.I_3p.withCons	0.000265339
5_ss.GC	5.18439e-05		ShortSeq.TTA.I_5p	0.000331453		ShortSeq.TGA.I_5p	0.000265262
ELAVL1_v3.I_3p	5.11381e-05		YeoClustUp.TGCTT.I_3p	0.000326058		RBMS1.I_5p.withCons	0.000264412
YeoClustUp.CTTTA.I_3p	5.09128e-05		YeoClustDown.TGAGG.I_5p	0.000323666		YeoClustDown.GCATG.I_5p	0.000260934
KHDRBS2.I_5p	5.07348e-05		ShortSeq.GAC.I_3p	0.000320662		SecStr.avgI_3p_71_140	0.000260934
