# Supplementary material for: Systematic identification and characterization of exon–intron circRNAs
Source: Genome Res. 2024 Mar;34(3):376–93. doi: 10.1101/gr.278590.123 (PMC11067877; doi:10.1101/gr.278590.123)
Supplement: Supplement 5 [file Supplemental_Table_S5.xlsx]

## Sheet: Table S5. CRISPR_sgRNA_count
Supplemental Table S5: sgRNA counts in whole genome CRISPR-Cas9 screen in two reporter cell lines
	sgRNA	gene	sequence	input_PAIP2	low_PAIP2	high_PAIP2	input_EIF3J	low_EIF3J	high_EIF3J
1	sgRNA_1	A1BG	CATCTTCTTTCACCTGAACG	623	439	1081	764	902	867
2	sgRNA_2	A1BG	CTCCGGGGAGAACTCCGGCG	696	779	583	802	980	871
3	sgRNA_3	A1BG	TCTCCATGGTGCATCAGCAC	48	46	44	25	48	0
4	sgRNA_4	A1BG	TGGAAGTCCACTCCACTCAG	1745	796	1497	1164	1389	1694
5	sgRNA_5	A2M	ACTGCATCTGTGCAAACGGG	291	133	569	412	268	324
6	sgRNA_6	A2M	ATGTCTCATGAACTACCCTG	452	448	120	437	904	785
7	sgRNA_7	A2M	TGAAATGAAACTTCACACTG	254	78	527	242	459	301
8	sgRNA_8	A2M	TTACTCATATAGGATCCCAA	82	152	577	276	157	252
9	sgRNA_9	NAT1	CGGAAGACACAAGGCACCTG	117	209	217	220	560	129
10	sgRNA_10	NAT1	GAACCTTAACATCCATTGTG	353	239	539	463	478	585
11	sgRNA_11	NAT1	GTTGTGAGAAGAAATCGGGG	132	163	0	229	348	365
12	sgRNA_12	NAT1	TTGGACGCTCATACCAGATG	260	122	582	168	849	644
13	sgRNA_13	NAT2	ATTGTAAGAAGAAACCGGGG	142	86	269	245	291	353
14	sgRNA_14	NAT2	TAACAAATACAGCACTGGCA	331	56	256	569	403	444
15	sgRNA_15	NAT2	TAGAGGCTGCCACATCTGGG	1081	672	102	494	835	734
16	sgRNA_16	NAT2	TGTGGTCTGAAAACCGATTG	614	970	341	803	437	623
17	sgRNA_17	SERPINA3	CCCAAGATACTCATCAGTCA	190	287	160	76	128	278
18	sgRNA_18	SERPINA3	CGTTGGCGGAGGCTAATCCG	434	184	726	463	894	601
19	sgRNA_19	SERPINA3	GAGTTGCTCTTTGACAAACA	321	350	308	355	365	58
20	sgRNA_20	SERPINA3	GTGGTGGAGCTGAAGTACAC	128	286	489	327	210	602
21	sgRNA_21	AADAC	AAGTCTGAAGCACTAAGAAG	729	331	172	650	540	823
22	sgRNA_22	AADAC	ATGTATATAATGCCTTAAGG	191	282	363	575	507	295
23	sgRNA_23	AADAC	ATTTCTATCCAAATCACTCA	65	231	0	180	250	184
24	sgRNA_24	AADAC	GGTATTTCTGGAGATAGTGC	374	796	365	484	408	608
25	sgRNA_25	AAMP	AAGATGACAAAGCCTTCGTA	176	370	234	413	567	1057
26	sgRNA_26	AAMP	AGGTGACCTCGCTATCGTCG	274	483	360	155	395	513
27	sgRNA_27	AAMP	TGAGTGGCCTCTTGAAAGTG	483	665	383	403	278	405
28	sgRNA_28	AAMP	TGGATGTGGAAAGTCCCGAA	96	430	176	315	165	477
29	sgRNA_29	AANAT	ACCTTCACGCTCGATCTCAA	126	423	118	222	248	120
30	sgRNA_30	AANAT	GCCCTCCTCGAACCAGCCCA	1047	613	929	698	895	1045
31	sgRNA_31	AANAT	GGTGAGGCAGCGAAACTCAC	246	623	183	308	490	327
32	sgRNA_32	AANAT	GTGGCGCCGCTGACAGCTCG	1533	1787	1703	1000	1177	1672
33	sgRNA_33	AARS1	CCAAGAAAAGCATTGACACA	787	573	1137	603	789	1699
34	sgRNA_34	AARS1	GGAGGCCAGATCTATGACGA	568	225	898	703	329	1326
35	sgRNA_35	AARS1	TCAGAATGTGCGTAGCTGTG	762	342	610	589	365	2176
36	sgRNA_36	AARS1	TTGGTGCTGAGGATGCCGAT	574	948	675	387	519	1151
37	sgRNA_37	ABAT	CCTTAAAGACCATCTTCATG	59	160	0	175	41	191
38	sgRNA_38	ABAT	GAAAGAAGTCATCGGATGCG	381	376	151	64	90	131
39	sgRNA_39	ABAT	GTGAATGGCTTTAGAGTGCG	506	105	671	485	803	611
40	sgRNA_40	ABAT	TGCAATTACGAAGAGAGCCG	256	151	534	251	194	443
41	sgRNA_41	ABCA1	AATGCAGAGAAAGCTATCTG	540	268	1059	579	672	709
42	sgRNA_42	ABCA1	GGACACGCCCAGCTTCAAGT	46	0	533	270	589	412
43	sgRNA_43	ABCA1	GTGGCATGGCAGGACTACGT	49	282	39	174	118	160
44	sgRNA_44	ABCA1	TTGGACAGCCCAAGACATCG	149	117	355	63	241	248
45	sgRNA_45	ABCA2	CATGTACGTGGCGATCCGAG	226	478	535	635	638	703
46	sgRNA_46	ABCA2	CTTGTGTGGCAACAACCGGT	123	98	52	99	124	102
47	sgRNA_47	ABCA2	GATGTCGTGCCCGTAGATGG	218	228	155	271	204	410
48	sgRNA_48	ABCA2	TAGGGGATGAAATTGCCACG	254	290	224	396	188	50
49	sgRNA_49	ABCA3	AATGCGCATTTACTGACCGA	887	593	750	595	880	900
50	sgRNA_50	ABCA3	ACCTACGGTTCAGTTACACA	368	51	129	308	480	380
51	sgRNA_51	ABCA3	AGTGGACGGGCATACATCAG	844	402	1051	837	652	905
52	sgRNA_52	ABCA3	CCTCCTGAGTCCCGTCAACG	392	309	310	152	223	613
53	sgRNA_53	ABCB7	AGTCATTAAAAAGTATCACA	2	0	0	84	136	46
54	sgRNA_54	ABCB7	CACACCACAGACAGCTACCG	513	356	751	856	315	599
55	sgRNA_55	ABCB7	GATTAAATACCAAAGCACTC	135	0	145	65	146	117
56	sgRNA_56	ABCB7	TCACAGTTGCAGTCACACGG	209	0	406	107	224	321
57	sgRNA_57	ABCF1	CTGCAGAGGCCAAAGCACGG	560	298	612	186	383	580
58	sgRNA_58	ABCF1	GATGGAGTATGAGCGCCAAG	688	236	758	602	307	713
59	sgRNA_59	ABCF1	GCAACACATCAATGTTGGGA	193	386	719	246	173	462
60	sgRNA_60	ABCF1	TGTAATTGCCCCTATAGTAG	281	1	818	497	159	646
61	sgRNA_61	ABCA4	AAAGACCGAGCCCCTAACAG	252	277	469	189	282	377
62	sgRNA_62	ABCA4	AGCACCATACCCGCAAACAG	128	20	139	76	113	170
63	sgRNA_63	ABCA4	AGGGTGTTGAGTTGCCACAG	30	231	247	254	331	427
64	sgRNA_64	ABCA4	GATCCGAATGGACATAGACG	124	343	278	76	174	246
65	sgRNA_65	ABL1	CTTAGGCTATAATCACAATG	476	672	718	259	359	526
66	sgRNA_66	ABL1	GGTTCATCATCATTCAACGG	554	282	191	429	406	841
67	sgRNA_67	ABL1	TCAGTGATGATATAGAACGG	930	254	70	314	530	378
68	sgRNA_68	ABL1	TTGCTCCCTCGAAAAGAGCG	729	435	600	974	595	1147
69	sgRNA_69	AOC1	CAGACCAAGTACCTCGATGT	16	355	160	277	226	159
70	sgRNA_70	AOC1	GCTGTATGATAAGCCAACTG	172	92	0	143	119	120
71	sgRNA_71	AOC1	GGCAACGCTGTGCTCTACGG	559	308	273	407	263	199
72	sgRNA_72	AOC1	GTGGCTTCAACTTCTATGCG	197	406	263	133	178	203
73	sgRNA_73	ABL2	AACCTCTGTAATGACGACGG	392	265	152	181	588	630
74	sgRNA_74	ABL2	GGTTCAACATCACAACCATA	118	301	0	222	275	283
75	sgRNA_75	ABL2	TATCGAATGGAACAGCCTGA	317	345	280	419	153	309
76	sgRNA_76	ABL2	TGTACACCATCACTCCACAG	124	309	227	325	202	202
77	sgRNA_77	ABO	AGCCAAAGGTGCTGACACCG	439	1033	109	166	452	537
78	sgRNA_78	ABO	ATGGAGTTCCGCGACCACGT	196	553	75	516	447	448
79	sgRNA_79	ABO	CCGGTCCCCAGCGTCACGCG	231	531	373	218	360	201
80	sgRNA_80	ABO	TGATCAGTGACTTCTGCGAG	589	732	642	551	557	705
81	sgRNA_81	ABR	CAAGAGTGAAATCCAGAAGG	369	871	214	502	477	789
82	sgRNA_82	ABR	CTGCAGTGACAACGCCCAAG	284	181	426	317	418	306
83	sgRNA_83	ABR	GAGGCTTGACACTCACGTGT	280	46	150	460	247	208
84	sgRNA_84	ABR	TACTGTCCTCGGACTACGAG	84	431	303	156	254	412
85	sgRNA_85	ACAA1	AGCGCGAAGTAATATTTCCA	232	0	0	129	102	101
86	sgRNA_86	ACAA1	CTGCCGAGAGAAGCTCGTCG	326	260	429	140	309	455
87	sgRNA_87	ACAA1	GCCCTTGTCATCATGGACCG	319	327	217	339	468	521
88	sgRNA_88	ACAA1	TCAATAGACAGTGTTCGTCG	747	1578	550	530	498	523
89	sgRNA_89	ACACA	AATGCATGCGGTCTATCCGT	877	1472	1470	790	748	518
90	sgRNA_90	ACACA	CCAGAGTCCCACATTCCCTG	330	780	303	611	607	821
91	sgRNA_91	ACACA	TATTTGCCTAGGTACCGAAG	905	1215	829	351	836	349
92	sgRNA_92	ACACA	TGATGGGTCCATGATAACCG	744	250	882	108	735	144
93	sgRNA_93	ACACB	AAAGCGTGTGACAAACTCAG	439	696	184	89	158	251
94	sgRNA_94	ACACB	ACAACGACATCGACACCGGG	374	217	273	830	654	478
95	sgRNA_95	ACACB	GAACTCGAATATGGCCAGCG	369	358	580	269	464	522
96	sgRNA_96	ACACB	GTCGGAGTCCATAATCCACA	219	183	268	204	292	573
97	sgRNA_97	ACADL	CAGAAAAAGGCTAATACCAT	57	95	0	147	91	250
98	sgRNA_98	ACADL	CTCCTCCCAGACAATAGCTG	236	333	413	227	230	296
99	sgRNA_99	ACADL	GCCACTTACTCTGAGTGATG	94	334	527	166	316	238
100	sgRNA_100	ACADL	TAAAATGGGATTAAAAGCCC	77	213	784	362	136	574
101	sgRNA_101	ACADM	AAGATGTGGATAACCAACGG	193	59	0	111	235	235
102	sgRNA_102	ACADM	AATTGGCTTATGGATGTACA	427	261	481	750	793	839
103	sgRNA_103	ACADM	ATTGTGGAAGCAGATACCCC	210	65	0	25	120	102
104	sgRNA_104	ACADM	GTATTTGGGGAGAATGACTG	285	346	70	430	516	570
105	sgRNA_105	ACADS	ACACACCATCTACCAGTCTG	767	1125	2194	834	1050	1391
106	sgRNA_106	ACADS	GACACTCATGATGACTCCGG	233	337	527	534	379	863
107	sgRNA_107	ACADS	GGCAGGTACCTGGTTCGCTG	142	94	268	668	869	757
108	sgRNA_108	ACADS	TAAGGAACATCTCTTCCCAG	369	77	276	209	258	394
109	sgRNA_109	ACADSB	AGCCAAAGTTGATGCATCTG	403	164	286	254	348	302
110	sgRNA_110	ACADSB	ATGGAGAAATCAGTAATACA	212	193	142	181	114	97
111	sgRNA_111	ACADSB	ATTGAGTAGAGCTTCTGACT	339	272	426	105	213	306
112	sgRNA_112	ACADSB	TTCGAATGTTAACGGGCAGG	216	584	84	451	702	635
113	sgRNA_113	ACADVL	CACTAATCGTACCCAGTTTG	263	269	419	752	397	393
114	sgRNA_114	ACADVL	GTCTAACCGAGCCCTCAAGC	35	115	26	23	139	178
115	sgRNA_115	ACADVL	GTGGAGGAGACCACTTGGCA	164	250	134	291	206	379
116	sgRNA_116	ACADVL	TCCTGGTCAGAGCGTCAGAG	478	223	79	162	344	425
117	sgRNA_117	ACAT1	CTGCCTAAAAAAGATCCAAT	0	0	0	0	93	40
118	sgRNA_118	ACAT1	GAAGTGAAAGAAGCATACAT	271	0	116	90	138	198
119	sgRNA_119	ACAT1	GAGGATCAACACCATATGGT	819	292	334	690	779	790
120	sgRNA_120	ACAT1	TTCTGCGCAGGATGTGATGG	370	381	624	474	507	564
121	sgRNA_121	ACAT2	CCTGTTAGACAAGCCAGTGT	368	318	384	120	185	169
122	sgRNA_122	ACAT2	GCAGTCCAGTCAATAGGGAT	461	408	387	258	246	373
123	sgRNA_123	ACAT2	GTTCTCAAGTAAGCCAAGTG	520	478	353	237	542	348
124	sgRNA_124	ACAT2	TCTATGTTGCTCCCATGGCG	391	315	0	475	577	415
125	sgRNA_125	ASIC2	CTGGAGTTCCTGCACCGTGT	1088	371	391	603	642	1490
126	sgRNA_126	ASIC2	GAAGCCATTCAGGTTACAGA	78	156	23	341	168	145
127	sgRNA_127	ASIC2	GAGGAAACGACATTTGAAGC	388	377	303	819	700	748
128	sgRNA_128	ASIC2	TTTACAGCATCACCGCCTGT	609	635	373	461	846	1011
129	sgRNA_129	ASIC1	AAGTGCTACACGTTCAACTC	254	697	272	476	381	438
130	sgRNA_130	ASIC1	CCATGTCACCAAGCTCGACG	180	122	0	121	297	243
131	sgRNA_131	ASIC1	CTTCAGAGACAGCCGCTCGT	355	1660	335	584	494	375
132	sgRNA_132	ASIC1	TGAGATACCAGACACACAGA	257	0	132	257	580	366
133	sgRNA_133	ACHE	GGTGTCCATGAACTACCGGG	173	208	190	217	346	434
134	sgRNA_134	ACHE	TATGTGGACACCCTATACCC	151	0	231	300	129	548
135	sgRNA_135	ACHE	TGGTGGGAATGACACAGAGC	117	213	134	175	226	309
136	sgRNA_136	ACHE	TGTCCTCGTCTGGATCTATG	279	176	266	223	521	622
137	sgRNA_137	ACLY	AGAGCAATTCGAGATTACCA	30	274	49	28	65	23
138	sgRNA_138	ACLY	CGGTCACCTGTACACGACAG	255	251	528	335	220	225
139	sgRNA_139	ACLY	GACCAGCTGATCAAACGTCG	301	45	1076	530	451	530
140	sgRNA_140	ACLY	GCCAGCGGGAGCACATCGGT	163	0	80	62	54	79
141	sgRNA_141	ACO1	CCTGCCCCTAACATCACAGA	199	0	53	65	109	234
142	sgRNA_142	ACO1	CTTGGTGTCTAGGTTTGACG	242	459	551	256	365	521
143	sgRNA_143	ACO1	TTATTACCCAGACAGCCTCG	361	358	357	263	308	431
144	sgRNA_144	ACO1	TTGCATATGCTATTACTAAG	79	41	0	97	161	84
145	sgRNA_145	ACR	AAGCGCCCACACGAAATGGG	624	585	229	439	547	561
146	sgRNA_146	ACR	CCCCGACACTTACTCACACG	222	362	112	332	370	124
147	sgRNA_147	ACR	GAAAGCGCCTATGTGGTCGT	115	257	219	366	399	254
148	sgRNA_148	ACR	TAATGTGCATGACTGGAGAC	39	118	0	23	23	0
149	sgRNA_149	ACO2	ATCTTCTCCGAGAGTGTCAG	1544	1149	1043	1184	1120	1316
150	sgRNA_150	ACO2	GTCTCAATAGGACATCAACC	150	949	638	447	458	623
151	sgRNA_151	ACO2	GTGCAGCTACCAATTAGACC	566	418	732	324	599	699
152	sgRNA_152	ACO2	TCTCGGGGTTTGCGTCGTTG	52	0	0	37	20	0
153	sgRNA_153	ACOX1	ACCTATCACCGGATTAACGA	73	53	64	148	165	225
154	sgRNA_154	ACOX1	CTGTGGTTTCCAAGCCTCGA	643	583	392	601	487	832
155	sgRNA_155	ACOX1	GCGCCGCCGAGAGATCGGTG	257	285	126	400	217	449
156	sgRNA_156	ACOX1	TGGCATTGAAGCATGTCGGA	225	12	112	197	330	467
157	sgRNA_157	ACP1	ACATAGTATATAATCAAATG	24	0	81	0	9	92
158	sgRNA_158	ACP1	ACCCAGACACACAAACAGCA	54	19	45	93	70	77
159	sgRNA_159	ACP1	GGAACCCCCCTGACTACCGA	753	1175	661	1071	1282	1289
160	sgRNA_160	ACP1	GGGGTTCCCTATCTCATACC	101	0	102	214	270	437
161	sgRNA_161	ACP2	ACATGGTGGCCAACGAGACA	107	199	0	86	101	143
162	sgRNA_162	ACP2	ACCAGTGAAGACATATCCCA	56	26	58	138	129	186
163	sgRNA_163	ACP2	CACCTCTTATCACCGGCAAG	102	607	351	488	606	529
164	sgRNA_164	ACP2	TTCTGCAGCTGCTCATAACG	584	247	417	711	675	409
165	sgRNA_165	ACP5	ACCCACGGCTACAAAGCGCA	881	1254	743	514	494	826
166	sgRNA_166	ACP5	CTGGACACAGTGACACTATG	1123	582	1531	475	766	886
167	sgRNA_167	ACP5	GCTCGGCTATGGACCACACG	497	486	184	590	711	681
168	sgRNA_168	ACP5	GTACCAGGGCACTTTGCGAA	121	148	309	198	216	357
169	sgRNA_169	ACP3	AAAGGCAGGTATAGCAACTG	682	459	743	692	861	800
170	sgRNA_170	ACP3	ACTCCTTGGCTAGTACACTT	96	124	187	656	638	304
171	sgRNA_171	ACP3	CTACGACCCTTTATATTGTG	546	49	553	700	574	766
172	sgRNA_172	ACP3	GCCATGAGGATTCCTTTATG	497	938	894	557	550	447
173	sgRNA_173	ACRV1	CCTGACTCAAGCTCACTCAA	82	38	260	23	131	0
174	sgRNA_174	ACRV1	GCTGAAGGTGAGCATACTGT	344	964	234	170	351	410
175	sgRNA_175	ACRV1	TGGTTCAAGCAAGCACACTG	237	268	497	243	260	434
176	sgRNA_176	ACRV1	TTCAGGTGAGCACGCTTCAG	120	189	179	91	362	156
177	sgRNA_177	ACTA1	CTTCTACAACGAGCTTCGCG	42	66	263	197	86	155
178	sgRNA_178	ACTA1	GGGTCAGAAAGATTCCTACG	109	89	43	83	194	290
179	sgRNA_179	ACTA1	GGTGAAAGCCGGCTTCGCCG	62	77	548	176	261	140
180	sgRNA_180	ACTA1	TCAGGTAGTCGGTGAGATCG	374	533	1002	620	925	784
181	sgRNA_181	ACTA2	CATGTATGTGGCTATCCAGG	152	143	109	397	388	204
182	sgRNA_182	ACTA2	GAAGCTCATTGTAGAAAGAG	409	87	256	224	293	410
183	sgRNA_183	ACTA2	GACGTCCCAGACATCAGGTG	602	334	304	254	305	704
184	sgRNA_184	ACTA2	GGCCTCACCAGTAGTAACGA	221	323	283	376	282	405
185	sgRNA_185	ACTB	AAGAGCTACGAGCTGCCTGA	398	454	407	465	457	477
186	sgRNA_186	ACTB	CGTACAGGGATAGCACAGCC	490	269	107	333	259	315
187	sgRNA_187	ACTB	GGATTCCTATGTGGGCGACG	797	1549	288	464	368	514
188	sgRNA_188	ACTB	TCACCTGGGTCATCTTCTCG	736	534	594	231	527	609
189	sgRNA_189	ACTC1	CGATGGACGGGAAGACAGCG	347	267	694	414	688	490
190	sgRNA_190	ACTC1	CTGGGCTTCATCACCTACGT	264	0	173	210	360	347
191	sgRNA_191	ACTC1	GGTACGGCCAGAAGCATACA	627	259	612	906	721	676
192	sgRNA_192	ACTC1	TCTTCATGAGGTAGTCAGTG	494	194	282	463	581	465
193	sgRNA_193	ACTG1	AGCTGTAGCCTCGCTCAGTG	559	608	308	914	619	909
194	sgRNA_194	ACTG1	ATGGAAGGAAACACGGCTCG	54	0	151	210	195	574
195	sgRNA_195	ACTG1	CAACAGAGAGAAGATGACTC	470	52	47	133	259	153
196	sgRNA_196	ACTG1	CTTCTACAACGAGCTGCGCG	45	0	242	217	507	342
197	sgRNA_197	ACTG2	AGAGCTATGAGCTGCCAGAT	844	204	628	818	1164	460
198	sgRNA_198	ACTG2	CTGGATACCTGTGGTCACAA	805	667	1334	708	902	774
199	sgRNA_199	ACTG2	TGAATCCAGGACGATGCCTG	1471	1708	1335	1152	1974	1544
200	sgRNA_200	ACTG2	TGATGATGCCGTGTTCAATG	1241	920	414	844	930	1207
201	sgRNA_201	ACTN4	ACAGATCGAGAACATTGATG	172	789	374	236	312	214
202	sgRNA_202	ACTN4	ACTCCCACAATGTCAACACC	347	514	706	491	552	422
203	sgRNA_203	ACTN4	GTTCATCGTCCATACCATCG	183	69	246	432	431	225
204	sgRNA_204	ACTN4	TGGGCGGCTTGTGCACACGC	237	0	185	113	323	387
205	sgRNA_205	ACTL6A	ACCACCATACCAATAGCTGT	729	343	881	407	678	783
206	sgRNA_206	ACTL6A	ACTGCAATTCCAGTCCACGA	346	162	408	554	181	433
207	sgRNA_207	ACTL6A	AGAAGTTGCCTCAGGTTACG	1092	2167	876	1565	2149	1913
208	sgRNA_208	ACTL6A	TGTTCCGAGGGAGAATATGG	454	237	738	565	238	562
209	sgRNA_209	ACTN1	CAGGACATCAACAATGCCTG	307	344	394	332	236	213
210	sgRNA_210	ACTN1	GCAGGGCCTTGATCTCCGAG	834	1367	702	1066	1444	1385
211	sgRNA_211	ACTN1	GGATCCGCCGCACAATCCCG	280	266	741	191	331	288
212	sgRNA_212	ACTN1	GGCCCTAACTCAGAAGCGAA	172	204	88	243	303	405
213	sgRNA_213	ACTN2	AGGACTTCCGGGATTACCGC	377	73	97	101	117	258
214	sgRNA_214	ACTN2	CCAGGTTAATATTTCCTATG	245	150	356	344	219	183
215	sgRNA_215	ACTN2	CGAGTCGGCGTCGCTGACAG	82	384	521	277	308	467
216	sgRNA_216	ACTN2	TGATGGTCCAGATCATACCC	413	331	495	525	636	350
217	sgRNA_217	ACTN3	CAGTGAGCTGGACTACCACG	175	938	525	719	650	833
218	sgRNA_218	ACTN3	CCATGGCTGGAGAACCGTGT	78	253	31	224	163	418
219	sgRNA_219	ACTN3	GTCCAGGGCCTTGTTAACGT	113	43	582	203	216	164
220	sgRNA_220	ACTN3	TGCAACTGGAGTTTGCCCGG	376	374	115	318	383	429
221	sgRNA_221	ACVR1	ATTACACTGTTGGAGTGTGT	1036	438	641	633	612	360
222	sgRNA_222	ACVR1	CCATGACTTCTCATCACGGG	347	318	383	165	349	560
223	sgRNA_223	ACVR1	CTGGTGTAACAGGAACATCA	151	179	215	144	234	277
224	sgRNA_224	ACVR1	GCCATCGTTGATGCTCAGTG	307	340	827	376	430	360
225	sgRNA_225	ACVR1B	AAGAGATTATTGGCAAGGGT	167	19	142	25	166	107
226	sgRNA_226	ACVR1B	ACTTGACTCAGGTCACCTCA	275	1034	135	366	469	326
227	sgRNA_227	ACVR1B	CCGGTTCAGATAATCAAACA	116	204	270	225	127	181
228	sgRNA_228	ACVR1B	CTACACGTGTGAGACAGATG	236	22	444	205	121	240
229	sgRNA_229	ACVR2A	AGTGGTTTCAAACCTAGTAA	700	130	435	836	824	650
230	sgRNA_230	ACVR2A	ATTGCAGAAACCATGGCTAG	405	469	147	427	508	569
231	sgRNA_231	ACVR2A	CCAAAGATCCACATCAACAC	82	125	0	157	88	371
232	sgRNA_232	ACVR2A	CCAGTTGCTTAACGAATATG	398	292	1532	516	713	767
233	sgRNA_233	ACVR2B	ACAAGCCGTCTATTGCCCAC	165	761	0	265	482	390
234	sgRNA_234	ACVR2B	ATGACTTCAACTGCTACGAT	133	117	187	116	209	265
235	sgRNA_235	ACVR2B	ATGTCCACATGACCGTAGGG	559	272	398	493	259	379
236	sgRNA_236	ACVR2B	CTGGAGCGCACCAACCAGAG	270	180	210	125	173	82
237	sgRNA_237	ACVRL1	AGGCACCCCCAGGAACATCG	172	0	0	29	107	18
238	sgRNA_238	ACVRL1	CCAGGACTGTTCATCCCTCG	262	319	343	384	854	629
239	sgRNA_239	ACVRL1	CTGCGTGCTCGAGTTGCGGG	224	289	384	282	336	279
240	sgRNA_240	ACVRL1	TGGACAGTGACTGCACCACA	119	99	125	264	252	584
241	sgRNA_241	ACY1	AGGCACAAAGGTCATGTGGA	251	751	554	330	445	608
242	sgRNA_242	ACY1	CCATGCCTCACGCTTCATGG	398	501	272	335	92	370
243	sgRNA_243	ACY1	GCTGGACAGTGCGGATACGC	336	359	676	385	239	331
244	sgRNA_244	ACY1	TAGCTTAGTCAGGTTCACGG	88	1181	319	441	523	640
245	sgRNA_245	ACYP1	ACAGTGCAAGGACAATTGCA	569	674	1819	285	694	524
246	sgRNA_246	ACYP1	TAGGCTGAGGGTAAAAAGCT	129	41	128	457	218	318
247	sgRNA_247	ACYP1	TGGGTCCAGAACACTGACCG	86	356	75	335	487	351
248	sgRNA_248	ACYP1	TTCCTGCATATGACGCACCT	153	198	39	294	360	229
249	sgRNA_249	ACYP2	ACCAGCAAAGGCACCGTGAC	503	397	936	518	462	352
250	sgRNA_250	ACYP2	CGCCCAGTCACTCAAATCCG	153	49	172	365	434	282
251	sgRNA_251	ACYP2	GAGGTGTTCGGAAGAGTGCA	739	326	381	557	841	1092
252	sgRNA_252	ACYP2	TGAAGCTAGGAAAATAGGAG	485	188	620	441	602	706
253	sgRNA_253	ADA	CACAGACTGGTCCCCCAAGG	373	386	442	361	273	497
254	sgRNA_254	ADA	TCACCGTACTGTCCACGCCG	717	255	859	394	698	674
255	sgRNA_255	ADA	TCCCAGCTAACACAGCAGAG	59	0	1	121	286	83
256	sgRNA_256	ADA	TGGACATACTCAAGACAGAG	254	144	358	141	301	336
257	sgRNA_257	ADAM8	AGTCCGGGTACCCCTCTACG	808	424	1472	710	1293	1430
258	sgRNA_258	ADAM8	CAAACAGGTTCCCACACACG	462	245	109	324	279	456
259	sgRNA_259	ADAM8	CCACATACAGCTCCACGTAG	273	70	132	185	179	137
260	sgRNA_260	ADAM8	CCAGCTTAGACTCACCAAGT	230	767	75	143	183	281
261	sgRNA_261	ADAM10	CCCATAAATACGGTCCTCAG	154	239	0	207	157	309
262	sgRNA_262	ADAM10	GGAAATGGAATGGTAGAACA	316	117	332	223	394	247
263	sgRNA_263	ADAM10	TTCCATCAATAACAGACCCA	284	0	33	156	178	172
264	sgRNA_264	ADAM10	TTTCAACCTACGAATGAAGA	19	140	0	46	162	168
265	sgRNA_265	ADAR	AGGCAATCAACACCTCTCTG	172	79	381	110	150	31
266	sgRNA_266	ADAR	CGTTCTCCCCAATCAAGACA	17	31	236	0	45	83
267	sgRNA_267	ADAR	GTGCATACACTCAAGCAGTG	291	367	228	107	354	220
268	sgRNA_268	ADAR	TTCTTGTAGGGTGAACACCG	146	159	433	92	115	80
269	sgRNA_269	ADARB1	GGTGAATACATGAGTGATCG	182	497	428	558	363	297
270	sgRNA_270	ADARB1	TCAGGTCACCAAACTTACCC	363	382	247	264	919	239
271	sgRNA_271	ADARB1	TTCAGAAATCAGAGCGAGGG	1387	807	1163	965	1457	1247
272	sgRNA_272	ADARB1	TTGGAGCCCACGTAAAAGGG	893	1808	342	972	1073	1109
273	sgRNA_273	ADARB2	CAGAGCGATCGATATTCGTG	353	135	430	253	498	378
274	sgRNA_274	ADARB2	GGCGTTGGGGAACTGCACGA	619	569	660	539	519	682
275	sgRNA_275	ADARB2	GTGGACGGCAGGACGTTCGA	909	1006	279	610	863	1019
276	sgRNA_276	ADARB2	TCCTGGCATCACAAACACGG	352	1119	52	279	183	233
277	sgRNA_277	ADCY1	AACCGGGTTACGGACATGAG	510	932	129	214	303	522
278	sgRNA_278	ADCY1	CATGTTCAGATCCACCTCGG	645	723	315	496	403	622
279	sgRNA_279	ADCY1	CCCAGACGAAAGGACCACCA	436	643	759	586	1120	740
280	sgRNA_280	ADCY1	CGGGGTGGTGTAGACAACGT	161	344	147	486	517	963
281	sgRNA_281	ADCY2	ACTCCAAGTACCGGGTCATG	704	448	525	350	635	698
282	sgRNA_282	ADCY2	CAGGCAGACGCTAAGCACGA	152	149	959	372	558	700
283	sgRNA_283	ADCY2	CCTGTAATTGCATCAAGTCG	230	254	575	539	848	377
284	sgRNA_284	ADCY2	TGAAGCGGCATACAAACGTG	239	217	133	138	306	227
285	sgRNA_285	ADCY3	AGCTGTCTCCAGTACTACAC	540	580	645	433	586	810
286	sgRNA_286	ADCY3	CCACGGAGATGATCACGATG	316	295	127	332	398	507
287	sgRNA_287	ADCY3	GTCGATGAGTATCTCGACCA	414	160	402	734	577	636
288	sgRNA_288	ADCY3	TCTCTTCTAGGTAATCACAG	0	0	0	0	0	0
289	sgRNA_289	ADCY5	AGCCGCTCCAGTTTGTCCGA	122	169	154	309	450	309
290	sgRNA_290	ADCY5	AGCTACACTCACCTTTACGC	410	1	324	338	171	350
291	sgRNA_291	ADCY5	CACAGCGGGCGAGTACACTG	256	408	329	486	491	259
292	sgRNA_292	ADCY5	GACGACGATCCTCCGCTGAG	301	551	705	468	549	716
293	sgRNA_293	ADCY6	AACACTGCAGTACCTGAACG	1039	435	593	755	1156	643
294	sgRNA_294	ADCY6	ATAGATCCCAAGCATCAGGG	128	260	313	464	822	218
295	sgRNA_295	ADCY6	GATGACGCCTTCATCCGGAG	159	110	115	402	122	254
296	sgRNA_296	ADCY6	TTGGCCTGGCAACTTAACCG	123	373	35	203	489	193
297	sgRNA_297	ADCY7	AGAGGCACCAGAATGTCAGG	219	115	451	229	329	313
298	sgRNA_298	ADCY7	CCGTAGCCGGGTGCACATCA	229	933	668	169	299	218
299	sgRNA_299	ADCY7	GCGTGGGTAGGCAGCGACAC	163	51	0	126	23	114
300	sgRNA_300	ADCY7	TGTACGTCGAGTGTCTCCTG	495	1102	303	317	404	573
301	sgRNA_301	ADCY8	ATTTCCAGGACAACAAACCG	283	1053	100	263	496	346
302	sgRNA_302	ADCY8	CAAAACACGATGTTGACATG	233	259	82	566	536	625
303	sgRNA_303	ADCY8	CGATATTTAAGATGGCACCC	430	1592	472	143	264	299
304	sgRNA_304	ADCY8	GCTGCAGGTCATCCTCCAAG	146	31	251	358	671	506
305	sgRNA_305	ADCY9	GATATCGGGTCAGAGAGCCA	533	268	524	600	862	353
306	sgRNA_306	ADCY9	GCTACCACGTCACTGCATCG	376	202	742	590	730	392
307	sgRNA_307	ADCY9	GGGAGACTGTTACTACTGCG	604	511	277	778	1523	643
308	sgRNA_308	ADCY9	TGTACGCCCGGCATTACGCG	281	196	1011	252	508	314
309	sgRNA_309	ADCYAP1	AGAGGAAGAGGCGTACGGCG	66	0	203	86	224	238
310	sgRNA_310	ADCYAP1	GAAGCACCTGCAGTCGCTCG	688	298	662	407	685	510
311	sgRNA_311	ADCYAP1	GCTGCCAGACTTCGATGGCT	92	1351	0	266	262	110
312	sgRNA_312	ADCYAP1	GGCCTCGTTAAGGATCCCGT	179	45	189	316	205	94
313	sgRNA_313	ADCYAP1R1	CGAATCTTCAACCCAGACCA	192	240	136	283	211	317
314	sgRNA_314	ADCYAP1R1	GGTGAGCCGGAACTGCACGG	459	106	641	811	511	752
315	sgRNA_315	ADCYAP1R1	TGAATATGAATCTGAGACTG	466	150	551	489	434	654
316	sgRNA_316	ADCYAP1R1	TGTGGGACAACATCACGTGT	255	407	374	490	600	1175
317	sgRNA_317	ADD1	ATTATCGAGCATCCGCATGA	811	289	481	588	835	658
318	sgRNA_318	ADD1	CCTCTTGCCAATCTCCCCGG	958	551	327	646	764	968
319	sgRNA_319	ADD1	GACTAGCAGATCTCTTTGGG	495	165	1420	334	633	927
320	sgRNA_320	ADD1	GTAATGCCAATAGGCCTGTG	1143	979	1129	1089	1021	955
321	sgRNA_321	ADD2	ACTCGGCCATCTATGCAGCG	621	380	415	715	1195	571
322	sgRNA_322	ADD2	GCTGAGTGACACCTATGTCA	344	781	575	565	344	516
323	sgRNA_323	ADD2	GGAGAAGCACCGGCCCCATG	769	562	625	608	675	902
324	sgRNA_324	ADD2	GGTGCTAAGAAACCATGGAG	444	647	87	534	899	780
325	sgRNA_325	ADD3	AAGGATCCCACATTTCATGG	384	96	195	422	341	281
326	sgRNA_326	ADD3	ACCCAGAATACATTAGGGAG	324	227	207	318	194	305
327	sgRNA_327	ADD3	CTAGGCTTCTCTCGAATGAG	199	837	581	231	500	187
328	sgRNA_328	ADD3	GTCTACAAGTCTGTACAGGC	176	70	334	147	279	529
329	sgRNA_329	PLIN2	CCAATACCTATGCCTGTAAG	883	710	518	447	473	626
330	sgRNA_330	PLIN2	CTCAGCCTATCTCAGTACAA	215	201	645	241	288	292
331	sgRNA_331	PLIN2	GCAGCATTAACACAGTCTTG	158	139	609	339	383	729
332	sgRNA_332	PLIN2	GGATAAGCTCTACCTCTCAT	394	284	683	476	563	338
333	sgRNA_333	ADH1A	ACAGACTTTCTCTAGAGGCG	166	231	135	59	394	467
334	sgRNA_334	ADH1A	CACACTGAGGAATAGCGAGT	673	805	1423	627	773	468
335	sgRNA_335	ADH1A	CCAGTGTAAGCAATCCTCAG	924	154	243	587	161	404
336	sgRNA_336	ADH1A	CCATGGTACCACTAACCACG	121	0	427	106	166	139
337	sgRNA_337	ADH1B	CACCTTCTCCCAGTACACGG	106	676	132	79	185	205
338	sgRNA_338	ADH1B	CTGTCACACAGATGACCACG	322	140	342	346	428	502
339	sgRNA_339	ADH1B	GTCTGCAGTTAACGTTGCCA	601	1106	644	511	378	676
340	sgRNA_340	ADH1B	TGGAGCAGCCAGAATCATTG	424	158	502	169	388	264
341	sgRNA_341	ADH1C	AGCAGCCAGAATCATTGCTG	519	1468	377	474	334	731
342	sgRNA_342	ADH1C	CACCTTCTCCCAGTACACAG	165	167	84	40	113	176
343	sgRNA_343	ADH1C	GGTAGAGGTTGCACCTCCTA	510	1300	403	629	609	531
344	sgRNA_344	ADH1C	TGAAAACATAGGTCACCCCA	928	524	1001	592	593	626
345	sgRNA_345	ADH4	AAATTTAGAATCGATAACAG	228	397	494	141	251	383
346	sgRNA_346	ADH4	TACATTCTCTCAGTACACTG	169	315	62	115	167	140
347	sgRNA_347	ADH4	TCAACCTCTTCAATGCAAAG	0	0	167	65	91	97
348	sgRNA_348	ADH4	TTCCCACACAAATTTGTGAG	294	93	439	176	404	610
349	sgRNA_349	ADH5	GCTGGAATTGTGGAAAGTGT	229	120	439	401	143	341
350	sgRNA_350	ADH5	TCAGGGTATAGGCATCGGTG	201	195	312	91	183	247
351	sgRNA_351	ADH5	TGCTTCCCGGATCATTGGTG	616	201	690	140	133	746
352	sgRNA_352	ADH5	TGGGTTTACTAAAATCCTGA	104	545	265	52	18	107
353	sgRNA_353	ADH6	AAAACCCAACTGATGTCTGA	380	170	598	418	565	584
354	sgRNA_354	ADH6	CCTTCATGGCCCAAGATGGT	1050	1532	1433	1042	890	1180
355	sgRNA_355	ADH6	TAAGCACAGTGAAACCAGGT	1127	1535	1333	954	1226	1426
356	sgRNA_356	ADH6	TGCTGCAATCAATACTGCCA	572	503	971	794	372	1008
357	sgRNA_357	ADH7	AAGACGACGCAAGTGGAACC	231	1299	428	728	319	442
358	sgRNA_358	ADH7	CCTACTCGCTCCTAATGCAA	45	68	0	14	118	89
359	sgRNA_359	ADH7	CTTGGGACTGATACACTCAG	102	54	137	127	293	271
360	sgRNA_360	ADH7	TACATTTACCGAGTACACAG	73	0	168	73	42	0
361	sgRNA_361	ADK	AAAGTCGAATATCATGCTGG	766	545	696	779	1243	750
362	sgRNA_362	ADK	ACAGCAGAGATGTCAAGCAG	481	374	311	575	604	938
363	sgRNA_363	ADK	GTAGTAATGAGCATCCACAT	669	213	642	515	629	793
364	sgRNA_364	ADK	TCTGGAGAAAAACTGGATGT	325	474	731	575	228	314
365	sgRNA_365	ADM	CGACGCGACATCCAACCGAG	219	136	265	295	250	391
366	sgRNA_366	ADM	CTAGGAAGGCGAGCGAACCC	647	705	172	448	361	367
367	sgRNA_367	ADM	GCACCGTGCACGTCCCGAAG	519	847	618	225	465	331
368	sgRNA_368	ADM	TCTGGCGGTAGCGCTTGACT	348	155	358	173	511	430
369	sgRNA_369	ADORA1	AGGGGTCAGTCCCACCACGA	203	268	320	99	429	383
370	sgRNA_370	ADORA1	GAGGACCATGAGGAGAAGCG	120	366	227	399	147	393
371	sgRNA_371	ADORA1	GGAGAGGGATCTTGACCCGG	296	336	671	402	716	401
372	sgRNA_372	ADORA1	GGCAGCCAACGGCAGCATGG	523	649	479	567	424	193
373	sgRNA_373	ADORA2A	AAGCAGTTGATGATGTGTAG	237	1204	541	593	493	512
374	sgRNA_374	ADORA2A	ATGCTAGGTTGGAACAACTG	75	120	218	422	622	182
375	sgRNA_375	ADORA2A	GCGGCGGCCGACATCGCAGT	706	375	346	390	607	554
376	sgRNA_376	ADORA2A	TGGCTTGGTGACCGGCACGA	252	787	13	196	406	121
377	sgRNA_377	ADORA2B	CACCAGCATTATAAGCAGTG	818	656	568	554	807	704
378	sgRNA_378	ADORA2B	GGTATAAAAGTTTGGTCACG	456	479	37	355	495	191
379	sgRNA_379	ADORA2B	TCTCAAAGAGACACTTCACA	0	0	0	97	0	37
380	sgRNA_380	ADORA2B	TGGAGTCAATCCGATGCCAA	781	236	695	714	496	497
381	sgRNA_381	ADORA3	ATGGCGCACATGACAACCAG	1729	1000	2084	801	1032	1229
382	sgRNA_382	ADORA3	ATTGGACTCTGCGCCATAGT	612	415	187	325	465	586
383	sgRNA_383	ADORA3	GACATTTCTGTGGTACTCTG	420	198	196	374	321	709
384	sgRNA_384	ADORA3	GATGCCCAGGCTGACAACAA	223	589	788	762	735	1204
385	sgRNA_385	ADPRH	AAGTGAGCATCGAGAGTGGT	704	1178	956	649	807	1450
386	sgRNA_386	ADPRH	AGTCTTGGTAATGCTTAGCA	259	412	586	134	478	299
387	sgRNA_387	ADPRH	ATAGCAGACCACCCTTGCAG	61	85	379	197	323	287
388	sgRNA_388	ADPRH	GGAGAAGATACACCGGCAGT	317	376	906	468	1006	693
389	sgRNA_389	PARP1	AGCTAGGCATGATTGACCGC	434	178	555	583	217	837
390	sgRNA_390	PARP1	CGATGCCTATTACTGCACTG	1449	119	416	960	640	868
391	sgRNA_391	PARP1	GGCCATGATTGAGAAACTCG	222	48	0	153	22	0
392	sgRNA_392	PARP1	TACCGATCACCGTACCCACA	479	260	535	692	239	673
393	sgRNA_393	PARP4	CACACCAACTTACATCGTTG	513	581	1459	898	1015	1089
394	sgRNA_394	PARP4	CTGTTGCCAGGGTGCTACGG	394	475	83	266	432	233
395	sgRNA_395	PARP4	GAGTCGATCATTGAGAAACA	903	847	967	514	1227	998
396	sgRNA_396	PARP4	TCTCCTGTACAAAACATCGT	0	0	0	0	0	0
397	sgRNA_397	ADRA1D	ATCTCCGTGGACCGGTACGT	394	106	110	226	236	1
398	sgRNA_398	ADRA1D	CGGCGACGTGAATGGCACGG	116	977	294	258	353	144
399	sgRNA_399	ADRA1D	TACCGCAGAAGCGCTCGTCA	263	181	293	302	221	313
400	sgRNA_400	ADRA1D	TGCGCGCGACCACGTACACG	376	385	370	195	104	253
401	sgRNA_401	ADRA1B	CATCCTAGTCATCTTGTCTG	459	20	646	452	416	476
402	sgRNA_402	ADRA1B	CCATTCCAAGAACTTTCACG	76	214	55	183	189	42
403	sgRNA_403	ADRA1B	CTCCATCGATCGCTACATCG	288	622	177	265	165	380
404	sgRNA_404	ADRA1B	TCTTGGCCACTATATAGACA	367	345	198	100	293	129
405	sgRNA_405	ADRA1A	ATCTCCATCGACCGCTACAT	268	35	327	322	272	132
406	sgRNA_406	ADRA1A	CCAAGACGCACTTCTCAGTG	1004	1369	735	1068	1287	1338
407	sgRNA_407	ADRA1A	GGGTCCAATGGATATGACCA	409	783	322	442	453	458
408	sgRNA_408	ADRA1A	TGGCCTCAAGACCGACAAGT	479	868	563	829	845	989
409	sgRNA_409	ADRA2A	ATGATGGCCTTGATGCGGCG	730	1154	972	521	878	756
410	sgRNA_410	ADRA2A	GACGAGCACGTTGCCGAACA	1577	969	861	1139	1139	1170
411	sgRNA_411	ADRA2A	TCCAGCGCGTCGGTGTCGCG	174	46	53	261	369	404
412	sgRNA_412	ADRA2A	TGGTCGTTGATCTCGCAGCG	139	319	64	266	454	443
413	sgRNA_413	ADRA2B	CAGCCCCGACCCGACCATGG	1052	703	557	864	870	754
414	sgRNA_414	ADRA2B	CGGACACTCGAAGTCCACTG	552	685	1100	1038	1166	1081
415	sgRNA_415	ADRA2B	TGGAGTTGTACTCCAGCGCG	1137	1540	978	1019	1139	1521
416	sgRNA_416	ADRA2B	TGGTCGCCCTTGTAGATGAG	873	1103	956	1038	1135	1574
417	sgRNA_417	ADRA2C	ACACAGATGCACGATCGACG	58	29	0	62	123	366
418	sgRNA_418	ADRA2C	ATGGTGGCCTTGACGCGGCG	105	289	37	149	175	165
419	sgRNA_419	ADRA2C	CTACGCGCGCATCTACCGAG	167	63	261	177	450	415
420	sgRNA_420	ADRA2C	TGTACCAGGTCTCGTCGTTG	464	698	456	1050	974	1380
421	sgRNA_421	ADRB1	CGCACGCCCGTTGGCCAGCG	453	322	186	188	179	159
422	sgRNA_422	ADRB1	GTAGAAGGAGACTACGGACG	153	484	181	43	159	294
423	sgRNA_423	ADRB1	TGGCCATCGCCAAGACGCCG	319	73	353	325	801	446
424	sgRNA_424	ADRB1	TGGCCCACACGGTGCACACG	409	299	462	243	344	291
425	sgRNA_425	ADRB2	ATCCACTGCGATCACGCACA	884	584	339	763	960	619
426	sgRNA_426	ADRB2	CAGACGCTCGAACTTGGCAA	36	221	376	269	445	410
427	sgRNA_427	ADRB2	CCCTTTCCTGCGTGACGTCG	434	961	1003	900	1136	1081
428	sgRNA_428	ADRB2	GGGAACGTAGAAGGACACGA	396	245	697	403	673	648
429	sgRNA_429	ADRB3	ACCAGTGCGCCGTAACGCAG	166	62	851	359	495	581
430	sgRNA_430	ADRB3	CAGCGAAGTCACGAACACGT	205	45	51	44	221	109
431	sgRNA_431	ADRB3	CCAATACCGCCAACACCAGT	0	0	0	22	208	148
432	sgRNA_432	ADRB3	GATGGGCGCAAACGACACCG	147	548	216	366	748	280
433	sgRNA_433	GRK2	CATCGCATCATTGGGCGCGG	679	685	853	628	497	708
434	sgRNA_434	GRK2	CCAGGTCCGAGATCCGCACG	352	154	450	463	372	226
435	sgRNA_435	GRK2	CTCCTCATAGAATTCCACCA	152	0	239	650	330	344
436	sgRNA_436	GRK2	TCTGGAACACGTCCCCTCGG	688	698	992	743	729	1122
437	sgRNA_437	GRK3	ACTACTTACACACTCGCATG	137	152	308	314	180	407
438	sgRNA_438	GRK3	GATGAAGCAGAGTTTATCTG	445	338	667	511	891	684
439	sgRNA_439	GRK3	TATTGGACGAGGAGGATTCG	1183	1570	1348	738	763	1271
440	sgRNA_440	GRK3	TCTTCATAAAACTTCACCTG	334	162	441	150	400	479
441	sgRNA_441	ADSL	AAATGTGTGAAACCTAATGT	101	425	139	253	97	427
442	sgRNA_442	ADSL	CAGCAACGTTCTGAACGCAT	121	0	0	112	106	25
443	sgRNA_443	ADSL	GGTATAAATTCCGGACATGG	76	147	604	222	113	348
444	sgRNA_444	ADSL	TATTGAAGTACTGTCTGTGC	208	135	257	158	245	369
445	sgRNA_445	ADSS2	AATTTGAAGAGGTTACAAAA	130	31	138	90	57	44
446	sgRNA_446	ADSS2	CAGCTTTGGACGAATAAACT	0	0	0	43	239	135
447	sgRNA_447	ADSS2	TGACAGAGCTCATATTGGTA	280	231	526	666	372	582
448	sgRNA_448	ADSS2	TTTGGATTAATTATTCCACT	75	62	103	229	322	244
449	sgRNA_449	AP2A1	ACTACTTCGTCCCAGCACCC	645	751	232	536	591	365
450	sgRNA_450	AP2A1	AGGCCTTGTACAGTCGAAGG	723	497	443	312	463	791
451	sgRNA_451	AP2A1	CGGAGCGGGACGTCAGCGTG	104	250	39	183	302	456
452	sgRNA_452	AP2A1	TGGTGACGATCTGTAGCACA	484	263	443	322	241	314
453	sgRNA_453	AP2A2	CATCTCGGCCACGATCTGTG	530	780	290	564	638	609
454	sgRNA_454	AP2A2	GCTGAGTTCAAACAGATACA	404	0	195	232	308	560
455	sgRNA_455	AP2A2	GGACGACGTGCAGGGCTACG	271	328	201	169	243	62
456	sgRNA_456	AP2A2	GGGCGACTGGACATCCCGAG	423	169	232	257	317	313
457	sgRNA_457	AP1B1	CCTCGCCAACTATATGCCCA	163	385	267	281	285	116
458	sgRNA_458	AP1B1	CTAACAGTGTGGGCTCGATG	163	194	80	287	296	531
459	sgRNA_459	AP1B1	CTTTAGAAAGAGTTTCACAA	62	22	62	127	161	90
460	sgRNA_460	AP1B1	TGGCGTAATTCATCAAGTAG	180	141	37	455	544	470
461	sgRNA_461	AP2B1	ACTTGCCAATTCATCATGGG	468	493	1069	667	691	582
462	sgRNA_462	AP2B1	GAGTTGGCATGGGATAGCCG	241	234	620	518	225	692
463	sgRNA_463	AP2B1	GGTGGTGGCTAATGCCGTAG	0	0	0	0	235	1
464	sgRNA_464	AP2B1	GTCTAAGTTCTCACACAGAG	236	27	288	229	340	159
465	sgRNA_465	AP1G1	ATAGCACGCAATTCGTACAG	268	264	456	564	685	1074
466	sgRNA_466	AP1G1	CATGCAGCCACTTGTACCAA	1071	390	1029	1024	942	884
467	sgRNA_467	AP1G1	GGTATGCACCTTCCAAACGA	408	294	347	410	578	510
468	sgRNA_468	AP1G1	TGTTCAATAAGAAACGACCC	287	269	112	445	567	492
469	sgRNA_469	AEBP1	CCAGACCTTTCATGGGAACG	321	316	79	316	622	186
470	sgRNA_470	AEBP1	GCACCAGGCTGCGCACACGT	318	269	493	484	301	446
471	sgRNA_471	AEBP1	GCGCCGAATGTACTCAACTG	112	172	32	283	215	434
472	sgRNA_472	AEBP1	GTGTGACTCCATCCCAATGG	1174	718	1685	1022	866	661
473	sgRNA_473	TLE5	CAAGCTCGAATGTGACAAGT	190	192	51	166	26	179
474	sgRNA_474	TLE5	CCTGCCCTACCTCTCCCAAG	107	115	140	57	87	23
475	sgRNA_475	TLE5	CGGATGATAGAGTTCAGCTC	0	139	36	58	232	383
476	sgRNA_476	TLE5	GTGGTGAATTTGAGTTGCTG	1280	2165	803	934	1603	1308
477	sgRNA_477	CRISP1	AACTACTGACCACTACACTC	67	200	369	325	437	347
478	sgRNA_478	CRISP1	GAGTCTACAAGTTTCAAACA	202	121	367	194	284	410
479	sgRNA_479	CRISP1	TTAATATACACAACGCCCTC	52	122	0	165	238	150
480	sgRNA_480	CRISP1	TTGGAAGTCTCCTCTCAAGG	674	535	918	758	737	389
481	sgRNA_481	AFM	AAAAAATATGTGCTATGGAG	601	1355	146	371	441	166
482	sgRNA_482	AFM	AGAGAATATTCACCGTGTCA	457	315	731	728	1129	875
483	sgRNA_483	AFM	AGTCAACTGCCTTCAAACAA	249	75	178	109	285	268
484	sgRNA_484	AFM	TATAACAAGAAATCTGATGT	775	323	267	281	622	386
485	sgRNA_485	AFP	ACATTGACCACGTTCCAGCG	182	420	32	415	156	263
486	sgRNA_486	AFP	AGTGGCTTCTTGAACAAACT	136	367	283	401	269	198
487	sgRNA_487	AFP	AGTTGAATGCTTCCAAACAA	28	58	63	140	146	324
488	sgRNA_488	AFP	ATTGTAGGTGCATACAGGAA	795	305	491	441	285	527
489	sgRNA_489	AGA	ATGGTTGTAATCCATAAGAC	133	39	441	284	447	175
490	sgRNA_490	AGA	CCAGATCCCTCAAAATACTG	381	602	432	89	233	111
491	sgRNA_491	AGA	GGGCCAAGTGTTGACGACCA	1372	466	1396	1200	1281	1038
492	sgRNA_492	AGA	TGGAGGGCATTAGCATCTGG	434	103	163	314	382	424
493	sgRNA_493	ACAN	CAGCGGTCACCTGCACGACG	151	228	270	82	187	325
494	sgRNA_494	ACAN	CCTGCGCTCCAATGACTCTG	468	260	734	181	100	311
495	sgRNA_495	ACAN	GAACCAGCCTATACCCCAGT	754	228	339	406	474	452
496	sgRNA_496	ACAN	GAGGGCAGTTCACCAACCGT	239	64	494	394	330	441
497	sgRNA_497	AGER	CATCATAGGAGTATCTGTGA	573	193	986	767	445	461
498	sgRNA_498	AGER	GTCAGGGTTACGGTTCCACC	723	786	457	638	829	867
499	sgRNA_499	AGER	GTGCTCAAAACATCACAGCC	641	428	285	514	915	561
500	sgRNA_500	AGER	TGGAATTCTTACGGTAGACA	158	895	414	442	414	346
501	sgRNA_501	AGL	AAACACGAAACCTTATAGGA	290	87	537	90	416	579
502	sgRNA_502	AGL	ACGCTATGGGAATAAACCAG	145	120	54	289	558	344
503	sgRNA_503	AGL	ATGCGTAATATCCATAAACA	50	376	0	55	111	122
504	sgRNA_504	AGL	TGAAGAGTAACACAGTCCAA	1245	657	737	732	643	775
505	sgRNA_505	AGRP	ACGCAGCGACGTGAGGAGCG	97	136	233	522	515	273
506	sgRNA_506	AGRP	AGAAGAGGATCTGTTGCAGG	761	634	745	713	842	742
507	sgRNA_507	AGRP	CCTGCAGGTACTAGACCTGC	1043	811	545	773	816	887
508	sgRNA_508	AGRP	GCCACGCGAGGAGCCCAGAT	583	1163	408	551	502	403
509	sgRNA_509	JAG1	AAGTGCAAGAGTCAGTCGGG	385	153	447	449	522	688
510	sgRNA_510	JAG1	ATGGGCCCCGAATGTAACAG	414	19	674	379	426	748
511	sgRNA_511	JAG1	GATGAGGCCACGTGCAACAA	566	594	370	716	972	764
512	sgRNA_512	JAG1	TCATCAGCCGTGTCTCAACG	737	489	683	478	950	859
513	sgRNA_513	AGT	AGAGCGTGGGAGGACCACAG	405	254	327	334	123	222
514	sgRNA_514	AGT	CTTACCTTGGAAGTGGACGT	533	203	520	242	435	456
515	sgRNA_515	AGT	TGTCCTTCCAAGGAACACCC	92	169	192	56	158	133
516	sgRNA_516	AGT	TTGACACCGAAGACAAGTTG	455	349	871	855	969	873
517	sgRNA_517	AGTR1	CAAGCATTGTGCGTCGAAGG	108	75	0	177	147	161
518	sgRNA_518	AGTR1	GCTGTGTAGACAGCCCATAG	388	194	305	349	189	200
519	sgRNA_519	AGTR1	GTAGAAACACACTAGCGTAC	126	629	52	303	206	313
520	sgRNA_520	AGTR1	TCAGGCCCAGCCCTATCGGG	975	481	990	577	521	727
521	sgRNA_521	AGTR2	ACAGGCCATACACCAAACAA	604	218	491	213	623	432
522	sgRNA_522	AGTR2	ATTGGGCATATTTCTCAGGT	897	362	630	727	746	996
523	sgRNA_523	AGTR2	GGAGTAAATCAGCCACAGCG	959	202	466	640	559	616
524	sgRNA_524	AGTR2	GTACCTATCAACACTCATGC	414	686	202	260	261	402
525	sgRNA_525	APLNR	CACAGACTGGAAATCCTCGG	48	61	294	112	200	79
526	sgRNA_526	APLNR	CATGGTGTTACGCACCACCG	200	180	236	189	473	820
527	sgRNA_527	APLNR	GGGCACCACAAAGCCCACGG	215	207	183	166	128	224
528	sgRNA_528	APLNR	GTCATAGTCCCGGTACGTGT	610	128	723	215	262	643
529	sgRNA_529	AGXT	CCCCTTTACATGGACCGGCA	397	374	398	306	325	453
530	sgRNA_530	AGXT	CCGATGACCAAGGACCCTGG	314	337	392	312	393	546
531	sgRNA_531	AGXT	GCTGCTGTTCTTAACCCACG	218	273	481	258	144	91
532	sgRNA_532	AGXT	GTCACTGAAGGAGATGAGCG	77	161	252	554	366	251
533	sgRNA_533	NR0B1	GAGCACAAATCAAGCGCAGG	258	280	804	461	378	385
534	sgRNA_534	NR0B1	GAGCGCAAAGCAAACGTACG	137	398	314	116	134	228
535	sgRNA_535	NR0B1	GGTAAAGAGGCGCTACCAGG	134	216	0	46	160	269
536	sgRNA_536	NR0B1	TAGCTCAAAGCAAACGCACG	398	465	65	462	505	348
537	sgRNA_537	AHCY	AACATGATTCTGGACGACGG	271	423	442	298	560	534
538	sgRNA_538	AHCY	CTCTGAGGAGACCACGACTG	407	157	547	115	579	200
539	sgRNA_539	AHCY	GATGATGTCAATACAGCCTG	297	209	715	417	578	560
540	sgRNA_540	AHCY	GCGGGCTCCGAAACCCCGCA	598	1105	79	447	484	442
541	sgRNA_541	AHR	ATCGCAAACAAAGCCAACTG	826	479	1207	405	348	547
542	sgRNA_542	AHR	CTTACTTCGGATATGGGACT	1279	1249	888	555	791	912
543	sgRNA_543	AHR	TACCACATCCACTCTAAGCA	508	332	288	433	320	465
544	sgRNA_544	AHR	TTATAACAGACTACTGTCTG	1333	793	1312	818	990	574
545	sgRNA_545	AHSG	AGACACTGTAAACTCCACAT	79	58	94	131	202	211
546	sgRNA_546	AHSG	AGATTGATGAAGTAAAGGTG	243	217	25	321	229	362
547	sgRNA_547	AHSG	GCAACACTCAGTGAGAAGCT	231	518	358	349	498	354
548	sgRNA_548	AHSG	GTTGTCTATAAATCAGCCCT	94	76	368	379	324	289
549	sgRNA_549	AIF1	AAAAGCTTTCGGACTGCTGA	300	343	78	396	611	686
550	sgRNA_550	AIF1	CAAACTCCATGTATTTCTCT	271	324	229	234	272	108
551	sgRNA_551	AIF1	TGCTATATTTGGGATCGTCT	482	144	455	425	484	630
552	sgRNA_552	AIF1	TTTCAGGGACATGATATCTG	531	421	1183	681	631	587
553	sgRNA_553	CRYBG1	AAATGGTCTTCGTGAATAGG	172	851	1	333	373	353
554	sgRNA_554	CRYBG1	AGAAACCAAAGTTACCGTCT	409	562	630	170	227	404
555	sgRNA_555	CRYBG1	GCCCAGGAACCATTTCGGCG	351	33	243	189	252	498
556	sgRNA_556	CRYBG1	GTGTCACAGCCCACGACTGA	293	565	98	189	817	533
557	sgRNA_557	AK1	AAGAGTTTGAGCGACGGGTA	847	1527	442	752	844	1168
558	sgRNA_558	AK1	AGTATTGACTTTGGCCACCA	523	475	495	531	951	895
559	sgRNA_559	AK1	GATTGATGGCTACCCGCGGG	202	126	249	105	281	337
560	sgRNA_560	AK1	GCCCTGAGACCATGACCCAG	598	972	276	479	617	708
561	sgRNA_561	AK2	AGGCTGATTCACCCCAAGAG	240	72	253	375	261	469
562	sgRNA_562	AK2	ATGGATGCTGGGAAACTGGT	1013	582	877	665	862	786
563	sgRNA_563	AK2	GTCCCTTTACCGGCCCCGGG	850	1616	368	540	775	1123
564	sgRNA_564	AK2	GTGAGGCAGGCAGAAATGGT	672	625	839	573	992	577
565	sgRNA_565	AK4	ATTCTTACATGTACATGAGG	570	151	430	383	290	545
566	sgRNA_566	AK4	GAGAACATCAAGGCCAGCAC	278	75	928	402	373	415
567	sgRNA_567	AK4	GTGCCCTTGCCCGAGCCGGG	641	414	625	693	1110	987
568	sgRNA_568	AK4	TCCGAGTTGGAGAACAGGCG	438	521	249	735	574	385
569	sgRNA_569	AKT1	CCTGCACTCGGAGAAGAACG	934	884	739	568	626	544
570	sgRNA_570	AKT1	GAAGGTGCGTTCGATGACAG	1112	1188	661	354	617	1028
571	sgRNA_571	AKT1	TGTCATGGAGTACGCCAACG	547	240	29	632	616	755
572	sgRNA_572	AKT1	TGTTGAGGGGAGCCTCACGT	731	811	1117	570	711	928
573	sgRNA_573	AKT2	CTCTTGAGTACTTGCACTCG	1003	870	1194	748	1150	1159
574	sgRNA_574	AKT2	GACCCCATGGACTACAAGTG	887	463	892	646	715	1084
575	sgRNA_575	AKT2	GGGGGGTAGAGTCTGATCAG	816	401	788	548	420	945
576	sgRNA_576	AKT2	TCTCGTCTGGAGAATCCACG	23	124	0	0	27	91
577	sgRNA_577	ALAD	AGACTCACGTGACAAAGATG	217	245	551	300	137	168
578	sgRNA_578	ALAD	ATGGATTGCCTCAATAGCTG	77	268	39	194	270	170
579	sgRNA_579	ALAD	CACACAGGTATGGTGTGAAG	309	346	215	347	431	454
580	sgRNA_580	ALAD	GGACATGATGGATGGACGCG	448	303	375	339	425	439
581	sgRNA_581	ALAS1	ACAGATCAAAGAAACCCCTC	175	126	335	424	254	199
582	sgRNA_582	ALAS1	CCACAATCTTGGGGACTGAG	827	480	1010	679	653	619
583	sgRNA_583	ALAS1	TCGAATCCCTTGGATCATGG	604	356	469	362	560	341
584	sgRNA_584	ALAS1	TGGTGCAGTAATGACTACCT	744	145	176	519	655	415
585	sgRNA_585	ALAS2	AATCCACCTTAAGGCAACAA	73	0	91	15	96	172
586	sgRNA_586	ALAS2	ACATCACACAACTCCTCGAG	97	434	357	202	385	369
587	sgRNA_587	ALAS2	AGGCACCAGTAAGTTTCATG	353	373	564	312	350	620
588	sgRNA_588	ALAS2	ATCCAAGGTATCCGTAACAG	149	180	789	141	241	396
589	sgRNA_589	ALB	ACTTTGGCATAGCATTCATG	353	57	311	565	518	300
590	sgRNA_590	ALB	CCTCTGGTCTCACCAATCGG	626	284	1035	736	342	1012
591	sgRNA_591	ALB	GCAACTCTTCGTGAAACCTA	81	94	401	180	227	114
592	sgRNA_592	ALB	TCTTATCTACTTACATGCCC	188	75	612	364	88	173
593	sgRNA_593	ALCAM	ATCCAGATGGCAATATCACA	702	2614	316	303	510	669
594	sgRNA_594	ALCAM	CTTACACACTGACGGATGTG	759	1531	1178	600	1157	966
595	sgRNA_595	ALCAM	TGAGGTACGTCAAGTCGGCA	646	835	773	860	744	736
596	sgRNA_596	ALCAM	TGTGTGCATGCTAGTAACTG	196	783	437	284	339	494
597	sgRNA_597	ABCD1	AGTTCCTCATGAAGTATGTG	480	212	391	616	759	557
598	sgRNA_598	ABCD1	CTACATGCACTCGCGTGTGG	896	258	459	502	927	1047
599	sgRNA_599	ABCD1	GATCATGTCGTCGTACAAGG	547	256	192	526	374	756
600	sgRNA_600	ABCD1	GGCCACATACACCGACAGGA	193	535	401	427	296	378
601	sgRNA_601	ALDH1A1	AGCATCCATAGTACGCCACG	840	909	1054	584	848	1203
602	sgRNA_602	ALDH1A1	AGCCTTCACAGGATCAACAG	448	520	249	308	481	578
603	sgRNA_603	ALDH1A1	GAATGGCATGATTCAGTGAG	1170	232	562	497	908	560
604	sgRNA_604	ALDH1A1	TGTTGAATTTGCACACCATG	806	779	920	741	909	865
605	sgRNA_605	ALDH2	AGCCTTGGCAACTGGAAACG	754	1752	958	1140	986	1195
606	sgRNA_606	ALDH2	CAGTGGACGGATTGACGGTG	846	575	762	1124	960	1137
607	sgRNA_607	ALDH2	CGCATGGACGCATCACACAG	444	421	520	653	1063	693
608	sgRNA_608	ALDH2	TTCCACGGCCCAATCCACTG	376	430	1025	942	790	1118
609	sgRNA_609	ALDH3A1	AGGGAAGAGTCCCTGCTACG	375	793	121	632	474	463
610	sgRNA_610	ALDH3A1	CTGTACCCAGTAATCAATGG	521	567	719	230	442	210
611	sgRNA_611	ALDH3A1	GGAGGTGGTGTACGTCCTAG	544	396	367	854	520	233
612	sgRNA_612	ALDH3A1	TTCTCCACAGGAGTTCTACG	609	211	392	440	803	664
613	sgRNA_613	ALDH1B1	ATTGTCCAAGGTCTCGAGTG	221	164	0	138	395	219
614	sgRNA_614	ALDH1B1	GGCATCCATCCGGCGCCATG	286	1488	670	663	502	528
615	sgRNA_615	ALDH1B1	GTGCCCAATGACCTCCCCGG	761	756	580	523	838	619
616	sgRNA_616	ALDH1B1	TCCAACCCTGCATGACCAAG	424	465	60	331	176	352
617	sgRNA_617	ALDH1A3	CAGAGAGCCGAGATAAAGGG	272	297	562	676	445	721
618	sgRNA_618	ALDH1A3	CGTCCGCACACACGATGCAG	101	0	465	337	210	159
619	sgRNA_619	ALDH1A3	GAATGGCACGAATCCAAGAG	684	1143	421	315	321	341
620	sgRNA_620	ALDH1A3	TGGATGCCCTGAGTCGTGGG	332	589	239	542	318	589
621	sgRNA_621	ALDH3B1	CGAGGTGCTGCCCCAATACG	394	460	34	548	363	1063
622	sgRNA_622	ALDH3B1	CTATCCGCTGAACCTGACGC	135	243	398	260	171	594
623	sgRNA_623	ALDH3B1	GCAGTCAGCCTTCGAGTCGG	688	202	871	320	537	645
624	sgRNA_624	ALDH3B1	GGGCAAGAACCCTTGCTACG	168	66	99	229	319	311
625	sgRNA_625	ALDH3B2	AAGCCGTCAGAAATCAGCCA	287	1221	497	286	478	768
626	sgRNA_626	ALDH3B2	AGTAGCAGAACCAGGCCACG	643	604	1212	733	905	681
627	sgRNA_627	ALDH3B2	TGGGCGGACCCCAGGAGACA	422	1092	732	548	745	949
628	sgRNA_628	ALDH3B2	TGGTCCTCATCATCGCACCC	522	667	952	851	574	1087
629	sgRNA_629	ALDH9A1	ATATGAACAATGCTGTAAAG	208	364	659	136	331	435
630	sgRNA_630	ALDH9A1	GAGCGGCTGCGACACGACGA	508	592	619	478	655	634
631	sgRNA_631	ALDH9A1	GTATAACCAAACGATCCACC	310	141	130	209	394	309
632	sgRNA_632	ALDH9A1	TCTGTGTCAGCATCCCGATG	223	120	251	95	173	187
633	sgRNA_633	ALDH3A2	GATGAGGCCACACGCTACAT	472	450	230	285	588	230
634	sgRNA_634	ALDH3A2	TCTCCCTCAGTATTTAGACC	0	0	0	0	0	0
635	sgRNA_635	ALDH3A2	TGGGGAAAATACATGAATTG	523	328	443	451	643	1022
636	sgRNA_636	ALDH3A2	TGGTGCTGATAATCGGAGCT	1006	1646	1498	1102	1373	1246
637	sgRNA_637	ABCD2	ATTACCTCTCAGTGACACAT	255	75	887	163	292	458
638	sgRNA_638	ABCD2	CCCTGACCAATCTCTTACGG	366	377	1280	890	636	656
639	sgRNA_639	ABCD2	CCTTATTGCACTGTTGACGA	390	351	336	284	670	538
640	sgRNA_640	ABCD2	CTGGAGCTGATGCTATTGAA	449	293	537	831	782	852
641	sgRNA_641	ALDOA	AATGGCGAGACTACCACCCA	296	178	509	846	614	760
642	sgRNA_642	ALDOA	AGGATGACACCCCCAATGCA	1353	1298	1108	936	1677	1081
643	sgRNA_643	ALDOA	CAAGTTATCAAATCCAAGGG	157	88	166	396	306	417
644	sgRNA_644	ALDOA	CTGAGTGCAAGCATGGCCTG	171	40	175	696	785	639
645	sgRNA_645	ALDOB	AAAACACTGAAGAGAACCGC	144	98	474	206	200	53
646	sgRNA_646	ALDOB	GGTACCTATTGTTGAACCAG	560	426	490	517	414	921
647	sgRNA_647	ALDOB	TATCCACAGTTAGACCAAGG	465	186	160	229	447	525
648	sgRNA_648	ALDOB	TCCATCAACCAGAGCATCGG	297	111	168	233	304	302
649	sgRNA_649	ALDOC	CCAGGATAAGGGCATCGTCG	488	323	1421	915	1135	952
650	sgRNA_650	ALDOC	GCCCGGGGCTACAATCCGCA	1012	1297	963	1198	1287	1695
651	sgRNA_651	ALDOC	GCGGCTGAGCCAAATTGGGG	705	278	1509	666	740	800
652	sgRNA_652	ALDOC	GTATACATGATGGTCACTCA	811	517	1180	711	1265	1242
653	sgRNA_653	AKR1B1	CACCAACATTCTGGACACGT	122	84	0	181	222	162
654	sgRNA_654	AKR1B1	CATGGGCACAGTCGATGTGG	269	270	0	231	298	394
655	sgRNA_655	AKR1B1	TGGTGCACGTACCATGAGAA	490	340	1417	634	669	499
656	sgRNA_656	AKR1B1	TGTTTAAGATCATCTCCACC	463	361	525	750	730	543
657	sgRNA_657	ALK	CCATACCTTAAATACGTAGG	735	1172	485	774	620	1021
658	sgRNA_658	ALK	CTCTATTGCAGTTAGCGGAG	93	343	0	128	413	173
659	sgRNA_659	ALK	CTGTAGCACTTTCAGAAGCG	891	712	418	492	713	1328
660	sgRNA_660	ALK	TCCAGACAACCCATTTCGAG	259	245	160	124	146	117
661	sgRNA_661	ALOX12	CCCCCATATCCGCTACACCA	178	237	485	300	401	402
662	sgRNA_662	ALOX12	TCCAAATATGAGATTCCATG	465	506	286	202	795	476
663	sgRNA_663	ALOX12	TCCATCTTCAGCATAACGAG	160	230	280	342	665	1172
664	sgRNA_664	ALOX12	TGAAGCTCTTCCATCCCCGA	902	975	517	808	1010	947
665	sgRNA_665	ALOX5	AACTCGATGTAGTCCCCGTG	436	463	265	401	352	605
666	sgRNA_666	ALOX5	CATCGATGCCAAATGCCACA	248	18	0	351	58	165
667	sgRNA_667	ALOX5	GGATTCATACGACGTGACTG	350	251	664	506	600	107
668	sgRNA_668	ALOX5	TAGAGCGGGTCATGAATCAC	290	471	846	391	370	376
669	sgRNA_669	ALOX5AP	AAAGCAGGACCCAGAATGGG	855	1043	1494	887	916	1048
670	sgRNA_670	ALOX5AP	AGAGCACAGCGAGGAAAGTG	518	697	1361	950	813	849
671	sgRNA_671	ALOX5AP	GCGGGGCTACTTTGCAGCCA	909	1041	1315	764	1019	1039
672	sgRNA_672	ALOX5AP	GGCAGTGTAGACCCGCTCAA	904	793	481	687	1019	873
673	sgRNA_673	ALOX12B	CAAGACGTGGGTACGCTATG	375	425	866	507	894	776
674	sgRNA_674	ALOX12B	CCAGTTACCGCCCTCCGGTG	375	316	702	517	586	814
675	sgRNA_675	ALOX12B	GTTCCCCGTCACAGACGACA	572	353	27	634	488	725
676	sgRNA_676	ALOX12B	TGCACATAGTTGCAGTACCA	728	794	174	394	835	629
677	sgRNA_677	ALOX15	AAGCGACTGTGGCCCGCACG	86	0	363	310	163	165
678	sgRNA_678	ALOX15	CAAACTATATGACCTCCCTG	83	207	19	102	377	378
679	sgRNA_679	ALOX15	CAATTTCAGCATGACTAGAG	258	73	554	320	343	403
680	sgRNA_680	ALOX15	TTCCAGGGTGTATCGCAGGT	350	217	610	715	787	567
681	sgRNA_681	ALOX15B	GACAGCGGCGGATCAGGACA	245	248	31	327	512	501
682	sgRNA_682	ALOX15B	TCCTTGCCGAGATTGTCCAG	452	240	682	395	417	276
683	sgRNA_683	ALOX15B	TGCCGAGTTCTCCTTCCATG	524	268	1698	731	1101	728
684	sgRNA_684	ALOX15B	TGGGAAGCCTCAGTTCTCTG	264	1133	305	698	615	320
685	sgRNA_685	ALPI	CAACACGACACGCGGCAATG	432	487	478	275	363	266
686	sgRNA_686	ALPI	CATGATGACCATGGTCGATG	39	512	262	374	187	302
687	sgRNA_687	ALPI	CCGTTCGCAGACATACAATG	287	110	143	116	90	260
688	sgRNA_688	ALPI	GATCCACCGAGACCCCACAC	372	25	47	421	114	207
689	sgRNA_689	ALPL	AGCTCTTCCAGGTGTCAACG	613	462	592	814	696	806
690	sgRNA_690	ALPL	CATTGGCCTTCACCCCACAC	626	928	269	232	690	557
691	sgRNA_691	ALPL	GATGACATTCTTAGCCACGT	247	14	398	361	596	530
692	sgRNA_692	ALPL	GGCATGGTTCACTCTCGTGG	320	248	416	222	118	206
693	sgRNA_693	ALPP	CCCGGACTTCTGGAACCGCG	695	182	574	646	956	643
694	sgRNA_694	ALPP	CGAAAGTACATGTTTCGCAT	149	252	318	75	85	0
695	sgRNA_695	ALPP	CGGCGTCCGAGTACCAGTTG	774	1208	422	1128	1035	1272
696	sgRNA_696	ALPP	TTGTCTACATTGTATGTCTG	1671	925	840	1089	1497	1354
697	sgRNA_697	ALPG	CGGCATCCGAGTACCAGTTG	523	383	468	910	883	701
698	sgRNA_698	ALPG	TCGCACATCAATGTCCATGT	416	198	767	420	437	468
699	sgRNA_699	ALPG	TGGCTCACTCACCGTCACCC	705	633	731	767	657	901
700	sgRNA_700	ALPG	TTGTCTACACTGTATGTCTG	763	1357	518	679	790	687
701	sgRNA_701	ALX3	GCCGCGCGTTACCTTCCGCG	713	558	1646	651	452	714
702	sgRNA_702	ALX3	GCTGCCCTTGGACTGCCGAG	1049	325	1426	795	880	1069
703	sgRNA_703	ALX3	GGAATGTGCTGAAGGTCGTG	1724	1535	515	789	1031	1340
704	sgRNA_704	ALX3	TCCTGCAGGTACTTGGCGGG	974	993	581	582	1032	1211
705	sgRNA_705	AMBN	CATGATGCCAAGTCTGGCAG	1346	1541	1371	938	878	1014
706	sgRNA_706	AMBN	CCCGGTGTTCCAGATTGCTG	1346	448	1647	393	776	1001
707	sgRNA_707	AMBN	TTATCTGTAATATAGCTCCC	270	29	412	523	471	377
708	sgRNA_708	AMBN	TTATCTGTGATATAGCTCCC	959	1070	678	785	955	781
709	sgRNA_709	AMBP	CCTAGGTGAATGTGTCCCTG	422	307	410	115	507	282
710	sgRNA_710	AMBP	TAGAGCTTGGCAGTAATGGT	184	80	44	308	398	331
711	sgRNA_711	AMBP	TGCAGAATGGAACATAACCA	205	429	141	181	191	353
712	sgRNA_712	AMBP	TTCTAGGAAAGGTGTCTGTG	336	340	316	369	477	409
713	sgRNA_713	AMD1	AAGCTTGCTAGGGATTACAG	188	155	39	46	123	74
714	sgRNA_714	AMD1	AATTCCGGTGTGGGTACCCT	376	270	183	288	436	375
715	sgRNA_715	AMD1	ATCTTCGCACTATCCCAAGG	233	0	618	279	240	224
716	sgRNA_716	AMD1	CCCACAAGGATTGAACATTG	139	230	0	152	196	125
717	sgRNA_717	AMELX	ACAGCACGGGGATGATTTGG	1116	1411	1436	989	1429	961
718	sgRNA_718	AMELX	CGGGCATCATTGGTTGCTGG	1175	683	684	917	1247	1316
719	sgRNA_719	AMELX	GGATTGGAGTCATGGAGTGT	1127	1634	1192	1354	1249	1132
720	sgRNA_720	AMELX	TGGGCTCGTAACCATAGGAA	200	843	0	365	501	447
721	sgRNA_721	AMELY	CAGGCATCAGTGCTTGCTGG	410	523	283	500	347	358
722	sgRNA_722	AMELY	CGTAACCATAGGAAGAGTAC	359	745	836	601	505	393
723	sgRNA_723	AMELY	GATGTGGTGATGAGACTGCA	945	414	1092	304	734	570
724	sgRNA_724	AMELY	GCACCACCAAATCATCCCCG	234	171	298	273	343	322
725	sgRNA_725	AMFR	ACAGGGACAGGACTCGACCG	849	809	1248	1182	1476	1768
726	sgRNA_726	AMFR	CCTCAACCACGAAGGGACGT	1342	1668	637	1106	1115	1112
727	sgRNA_727	AMFR	GCACAAGAACTATCTACGTG	498	1060	548	814	561	794
728	sgRNA_728	AMFR	TGTCTCTCACTCACTCGAAG	380	118	114	360	404	403
729	sgRNA_729	AMH	GCAGGGCCTAGTCAACCTGT	897	1171	617	660	987	727
730	sgRNA_730	AMH	GCGGACCTACCCTCTCCGCG	576	1035	785	541	351	437
731	sgRNA_731	AMH	GGGAGCCAACACCCTCGCTG	426	1306	652	938	651	829
732	sgRNA_732	AMH	TCTTCCGAGAAGACTTGGAC	280	674	867	313	523	423
733	sgRNA_733	AMHR2	CAGTGATAAATCGGACAATG	255	148	94	277	596	368
734	sgRNA_734	AMHR2	CCCACAGGCCAATATAAACC	0	81	80	229	351	53
735	sgRNA_735	AMHR2	CCCCAGCAGGTAATCCGGGA	122	225	514	87	354	489
736	sgRNA_736	AMHR2	CGAAAGAACTACAGAGTGCG	282	703	381	478	576	633
737	sgRNA_737	AMPD1	ACAGTAAGACCTATACCCAC	268	106	244	189	224	167
738	sgRNA_738	AMPD1	CAAGGACCAACTCACCCCAG	62	0	231	169	53	361
739	sgRNA_739	AMPD1	GCAGGTACATACTAGATCCT	0	102	0	285	149	344
740	sgRNA_740	AMPD1	TATCACCTCAAAATGAAGGA	36	75	111	0	160	27
741	sgRNA_741	AMPD2	GAGACCCGGACCTATGAACA	289	141	335	120	208	483
742	sgRNA_742	AMPD2	GGTGCACGTCTACACCCGCA	218	169	406	317	351	312
743	sgRNA_743	AMPD2	TGCCAAATACAACCCTATTG	127	25	242	210	138	454
744	sgRNA_744	AMPD2	TGCCCCGTATGAGTTCCCCG	70	0	241	217	210	312
745	sgRNA_745	AMPD3	AAAACTGAAAACTATCTGGG	303	696	898	645	812	731
746	sgRNA_746	AMPD3	CACCTCACTTACTAAATCCG	249	393	322	261	287	539
747	sgRNA_747	AMPD3	TCACGTTATAGAAGTCCCGG	272	408	271	159	65	280
748	sgRNA_748	AMPD3	TGATCCGGGAGAAGTATGCG	620	769	461	356	383	198
749	sgRNA_749	AMPH	AGACTTCCATCAAAAACTCG	136	117	164	360	306	128
750	sgRNA_750	AMPH	ATTGCCCTGGGACCTATGGA	204	223	358	244	325	436
751	sgRNA_751	AMPH	GGTGTCTTTGCAATGCGGAG	511	358	95	218	116	81
752	sgRNA_752	AMPH	TCCAACACTAGGCATGCAGG	625	467	515	399	516	357
753	sgRNA_753	BIN1	ACCTGGCCTCCGTCAAAGGT	676	468	813	591	870	814
754	sgRNA_754	BIN1	AGTCACGCATTGCCAAGCGG	441	710	384	769	415	1090
755	sgRNA_755	BIN1	CATCACTCCTACCTGAGATG	725	798	969	835	592	796
756	sgRNA_756	BIN1	TGAGGCAAACAAGATCGCAG	165	123	418	190	279	213
757	sgRNA_757	AMT	ACTGTCGCTGTTTACCAACG	685	863	846	733	877	1118
758	sgRNA_758	AMT	AGAGGGGGTATACCTGCATG	786	589	985	763	738	1246
759	sgRNA_759	AMT	CCAGGTACTACAGGCCGGCG	542	122	484	647	534	910
760	sgRNA_760	AMT	TGTAGCCACAGCGGGTCACG	326	739	188	154	330	227
761	sgRNA_761	AMY1A	AAGACAAGCGCTCTGTCAGA	880	695	1201	1237	723	1656
762	sgRNA_762	AMY1A	CAACACCAATGTCAATGAGA	39	0	49	132	0	90
763	sgRNA_763	AMY1A	GTGACTAGATGCAACAATGT	584	342	303	182	356	616
764	sgRNA_764	AMY1A	TGAGCGATATTTAGCTCCCA	759	2367	1376	947	803	682
765	sgRNA_765	AMY1B	AACAGTAACTGGTTCCCGGA	269	501	568	775	340	789
766	sgRNA_766	AMY1B	AATCAACGAGGACATGGCGC	456	206	870	470	679	354
767	sgRNA_767	AMY1B	GACTAGATGCAACAATGTTG	1002	503	356	614	348	476
768	sgRNA_768	AMY1B	GTCTTCTCGATCTTGCACTG	476	734	898	201	873	613
769	sgRNA_769	AMY1C	ATGAACCATCTCATTGACAT	243	266	441	240	194	294
770	sgRNA_770	AMY1C	GAACTATAATGATGCTACTC	201	128	206	62	109	405
771	sgRNA_771	AMY1C	GCTGTAATTAATCATATGTG	309	499	581	226	343	308
772	sgRNA_772	AMY1C	TAGCTCCCAAGGGATTTGGA	622	116	411	234	237	705
773	sgRNA_773	AMY2A	GAACTACAATGATGCTACTC	324	444	49	316	58	363
774	sgRNA_774	AMY2A	GAGCGATATTTAGCTCCGAA	201	35	0	144	109	34
775	sgRNA_775	AMY2A	TGACAATCAACGAGGACATG	81	429	171	361	244	591
776	sgRNA_776	AMY2A	TGTGGTAACGCTGTGAGTGC	333	524	721	392	256	589
777	sgRNA_777	AMY2B	AAGACAAGTGCTCTGTCAGA	219	67	427	384	313	263
778	sgRNA_778	AMY2B	ACAGGTCAGAGATTGTCGTC	154	217	337	442	317	516
779	sgRNA_779	AMY2B	ATGAATCATCTCATTGACAT	349	256	82	301	257	186
780	sgRNA_780	AMY2B	GACTAGATGTAACAATGTTG	566	517	1099	437	306	731
781	sgRNA_781	ANG	AATGTGTTGATGTCTTTGCA	600	684	604	757	962	1031
782	sgRNA_782	ANG	ATCCTGAGCCAGGGTCGGTG	732	700	716	896	915	796
783	sgRNA_783	ANG	CACTATGATGCCAAACCACA	274	276	60	138	190	294
784	sgRNA_784	ANG	GATACTGTGAAAGCATCATG	438	781	976	902	868	1161
785	sgRNA_785	ANGPT1	AGATATAACCGGATTCAACA	184	237	160	223	149	195
786	sgRNA_786	ANGPT1	GCAGAGAGATGCTCCACACG	1029	1213	816	815	1248	1527
787	sgRNA_787	ANGPT1	GCAGCTTGAGAATTACATTG	743	1024	588	657	1208	750
788	sgRNA_788	ANGPT1	TTGCAATATGGATGTCAATG	473	294	411	530	610	178
789	sgRNA_789	ANGPT2	AAGAACTGAATTATTCACCG	207	359	91	332	748	496
790	sgRNA_790	ANGPT2	ACCAAACAGCGGAGCAAACG	124	776	193	183	193	203
791	sgRNA_791	ANGPT2	ACCGAGTCATCGTATTCGAG	346	406	541	439	989	664
792	sgRNA_792	ANGPT2	TAACGTGTAGATGCCATTCG	599	477	713	477	718	605
793	sgRNA_793	ANK1	CATTCTAGAAACGACAACCA	344	231	35	353	233	258
794	sgRNA_794	ANK1	GACGGGAGCCTCGATCGACG	553	543	943	704	1333	1027
795	sgRNA_795	ANK1	GATCAAACACGGCGTCATGG	606	1300	872	756	1208	819
796	sgRNA_796	ANK1	TGTACTTCGTGATCATGTCA	451	632	342	329	722	776
797	sgRNA_797	ANK2	AAATGTTAACGCAAAAACCA	126	223	85	229	296	115
798	sgRNA_798	ANK2	ACATTACGGAAATGTCAACG	506	146	31	366	305	310
799	sgRNA_799	ANK2	GGGAGAATACCTTAGGCCTG	117	124	113	310	251	333
800	sgRNA_800	ANK2	TGGTGTGTACCCATTTGTAG	440	484	100	545	421	509
801	sgRNA_801	ANK3	CATGTGGATGCGCTTTACTG	455	530	665	479	244	1177
802	sgRNA_802	ANK3	GATGAAGTTCGACTGAAGTG	317	371	234	505	949	569
803	sgRNA_803	ANK3	GGATACACACCACTGCATGT	671	751	391	793	897	786
804	sgRNA_804	ANK3	GGGGCCGTACACTTGCGTGG	438	1437	785	568	501	605
805	sgRNA_805	ANPEP	CATCACGCTTATCCACCCCA	216	152	329	234	404	253
806	sgRNA_806	ANPEP	CCTTGGACCAAAGTAAAGCG	217	280	9	105	185	228
807	sgRNA_807	ANPEP	CGTTCAGGGCATAATCGCCG	133	175	89	64	82	184
808	sgRNA_808	ANPEP	TCACGGTGGATACCAGCACG	414	29	0	194	172	175
809	sgRNA_809	SLC25A4	CAAAGGGATCATTGATTGTG	152	54	85	341	250	320
810	sgRNA_810	SLC25A4	CCAGACCATGGAACTCACGC	103	219	670	128	122	387
811	sgRNA_811	SLC25A4	GGGGAAGTAACGGATCACGT	69	458	41	201	215	138
812	sgRNA_812	SLC25A4	TGGTAACCTGGCGTCCGGTG	62	0	70	137	276	122
813	sgRNA_813	SLC25A5	ACACAGGGATGTGGCCCCTG	278	242	459	362	360	440
814	sgRNA_814	SLC25A5	ACCCGTCTAGCAGCTGATGT	22	37	157	228	138	131
815	sgRNA_815	SLC25A5	AGATACCGAAGTAGGCGGCT	0	206	93	184	78	185
816	sgRNA_816	SLC25A5	GGAGTTCTGTCCTTCTGGCG	228	107	243	116	170	395
817	sgRNA_817	SLC25A6	CCAGCGGGTACACGAAGCAG	1047	932	1040	1220	1148	945
818	sgRNA_818	SLC25A6	CGAAGTTGAGGGCTTGAGTG	1463	1294	1133	1032	1217	1206
819	sgRNA_819	SLC25A6	CGTATCGTACACGCCGAAGT	64	149	163	178	311	450
820	sgRNA_820	SLC25A6	GCCGCCGACAAGCAGTACAA	735	574	627	938	559	701
821	sgRNA_821	ANXA1	AAGGCAGCGACATCCGAGGA	444	1665	555	336	402	492
822	sgRNA_822	ANXA1	AGAAATCAGAGACATTAACA	21	157	175	138	187	76
823	sgRNA_823	ANXA1	CCTTACAGGTCACCTTGAGG	314	591	469	339	496	686
824	sgRNA_824	ANXA1	TCACACCAAAGTCCTCAGAT	551	163	65	74	85	38
825	sgRNA_825	ANXA2	ACAGGGGCTGGGAACCGACG	419	199	762	391	420	424
826	sgRNA_826	ANXA2	CAGCCATCAAGACCAAAGGT	329	402	478	487	475	847
827	sgRNA_827	ANXA2	GGTCCTTCTCTGGTAGGCGA	1019	448	770	488	830	640
828	sgRNA_828	ANXA2	TGGGAAACCAACCTTTGCCA	870	521	532	423	510	473
829	sgRNA_829	ANXA3	CTGAGAGGTCAAATGCACAG	262	124	152	100	157	134
830	sgRNA_830	ANXA3	GAATAGATTCTCTATAAAGC	67	37	129	143	173	262
831	sgRNA_831	ANXA3	GAGGAAAGCTCCTTAAACAC	14	135	419	98	344	295
832	sgRNA_832	ANXA3	TTTGCATCAAAGACTGCTGG	318	1033	657	315	365	473
833	sgRNA_833	ANXA4	AACCGAAATCACCTGTTGCA	460	408	284	1036	806	1235
834	sgRNA_834	ANXA4	ACTGTGGCCTACCCTGCCGA	391	361	672	506	515	672
835	sgRNA_835	ANXA4	TATGCGCCGGATCTCCTCAG	779	1460	598	806	967	911
836	sgRNA_836	ANXA4	TTGCACGTCATACAGCACCG	511	133	216	494	466	367
837	sgRNA_837	ANXA5	AATCTCCACGCAATACCTGA	0	161	0	254	209	240
838	sgRNA_838	ANXA5	ACTCTTCGGAAGGCTATGAA	87	744	902	236	315	398
839	sgRNA_839	ANXA5	AGGCTGGAGAACTTAAATGG	1026	1186	400	885	1074	776
840	sgRNA_840	ANXA5	ATAAGCATCATAAAGCCGAG	246	226	475	437	515	870
841	sgRNA_841	ANXA6	GAGAAGCTAATGCTGGCCGT	293	198	512	138	415	267
842	sgRNA_842	ANXA6	GCAGGTGGCCTATCAGATGT	310	1205	705	422	579	920
843	sgRNA_843	ANXA6	GGGAAGCCAAGATCTCAATG	916	479	321	632	938	1181
844	sgRNA_844	ANXA6	TTGGCATCGTAATGGGCCGG	975	1104	983	800	1019	1027
845	sgRNA_845	ANXA7	AGGAACAAAATACCTGACTA	73	250	373	186	228	184
846	sgRNA_846	ANXA7	ATTTAAGACCTCCTATGGCA	391	109	267	384	306	218
847	sgRNA_847	ANXA7	CTCCAGGCATCGTAATACGT	76	51	634	162	264	215
848	sgRNA_848	ANXA7	TACCCACAAGTGCCAAGTAG	199	262	0	181	246	364
849	sgRNA_849	ANXA11	AGGACCTCGGCATCTCGCAG	298	224	601	350	456	271
850	sgRNA_850	ANXA11	ATAACGTGGCCACCTATGCG	470	1143	322	412	690	468
851	sgRNA_851	ANXA11	CGAGCTACCCAGGATACCCG	296	17	453	345	275	551
852	sgRNA_852	ANXA11	GGGATGTATCCACCCCCAGG	185	512	573	510	907	830
853	sgRNA_853	ANXA13	AAACTTCGAGAAGACAGCGT	318	689	431	293	699	770
854	sgRNA_854	ANXA13	AGCCTCGAATCAGATGTCAA	287	1011	461	711	566	858
855	sgRNA_855	ANXA13	CCTGTGCACGAGGACCAATA	648	1073	707	691	872	631
856	sgRNA_856	ANXA13	GTACAAGGCAACGTACGGCA	650	290	664	562	530	711
857	sgRNA_857	AOAH	AGCGACGAGTCAGTGTACCC	952	352	642	541	620	724
858	sgRNA_858	AOAH	CATGGCATATATAACGATGG	479	247	145	325	335	376
859	sgRNA_859	AOAH	CCTGTAGCACCAGAGAGTTG	457	946	445	154	225	238
860	sgRNA_860	AOAH	TGCTCAAGTTCACAACTCGA	184	200	187	154	72	162
861	sgRNA_861	AOC2	AGTCTGCATAGTAGTGCCCA	433	657	564	337	501	183
862	sgRNA_862	AOC2	CTGGGGCGAGAACTGAAGAG	354	2541	909	497	673	710
863	sgRNA_863	AOC2	GTCACATCCCGCATGTACGA	332	128	734	478	637	492
864	sgRNA_864	AOC2	TATATGGATGTCCACCATCG	522	230	1250	528	382	560
865	sgRNA_865	AOX1	CATATATAACCTACCACCAA	252	279	141	226	238	45
866	sgRNA_866	AOX1	CTGGTGTGAAGCATGCCACG	142	469	323	202	109	134
867	sgRNA_867	AOX1	GAGTTATGCATCTCATATGG	385	416	516	321	500	522
868	sgRNA_868	AOX1	GGGGTTCTACATACCCACAG	143	108	56	133	106	463
869	sgRNA_869	APAF1	CTGGTGAAAGAGTATGCGGC	1081	227	743	956	772	995
870	sgRNA_870	APAF1	TGAATTTGTATGACCAAACA	387	246	165	466	436	430
871	sgRNA_871	APAF1	TTCCTAAGGAACTCTCCACA	395	377	261	326	436	362
872	sgRNA_872	APAF1	TTTCCTAATATTGTACAACT	152	0	168	263	410	268
873	sgRNA_873	NUDT2	AAGATGCCTCATTCCCAAAG	847	256	1396	692	845	1075
874	sgRNA_874	NUDT2	CAAAAGGGAACTCAATTATG	890	410	307	757	1035	1009
875	sgRNA_875	NUDT2	CATCACTGGACTCCTCCCAA	860	710	813	452	668	529
876	sgRNA_876	NUDT2	GCCAGCTGACCATTATTGAG	519	1687	118	708	855	839
877	sgRNA_877	APOF	CATATGAAGTGGCATCCACA	160	557	1122	163	403	322
878	sgRNA_878	APOF	GGCTCTAAGGAATGCCCTGG	271	286	864	130	494	369
879	sgRNA_879	APOF	GTGTAGCATTCACACCACCC	390	423	854	577	682	695
880	sgRNA_880	APOF	TATGCTACTCAAAACTGCCT	431	271	379	299	571	126
881	sgRNA_881	APBA1	AGGAAATGGTCCTCAGAGGG	149	245	113	398	573	390
882	sgRNA_882	APBA1	CCAGGGACTGTGACGACCAG	322	252	379	660	689	581
883	sgRNA_883	APBA1	GAGCCCTATGCCGACTACGG	508	383	981	731	671	573
884	sgRNA_884	APBA1	TTCCATCGATCAAGTCTTCG	627	339	421	438	316	185
885	sgRNA_885	APBA2	CAGAGCTGGAGTCCCCATCG	1027	538	899	345	450	379
886	sgRNA_886	APBA2	CCAGGACTACTACCCCGAGG	267	372	121	347	558	412
887	sgRNA_887	APBA2	GAACCAGAAGACCTCATCGA	133	28	302	123	117	76
888	sgRNA_888	APBA2	GAGGACGACAGCTACCTAGA	245	290	347	169	225	327
889	sgRNA_889	APBB1	AGCTGGGCTACCTTATCCCA	375	379	484	572	410	383
890	sgRNA_890	APBB1	ATTGCGATTCTGGTCACGGT	532	385	220	469	263	298
891	sgRNA_891	APBB1	CCTGGGTTGGTATTCCGTGG	154	176	76	256	180	301
892	sgRNA_892	APBB1	TGAGGGTCCAGGACACCTCA	321	277	151	412	377	559
893	sgRNA_893	APBB2	ACTGGGGTCCGGGTTAACAG	299	228	239	99	250	350
894	sgRNA_894	APBB2	AGAACCGAGGCAATCACCAT	219	87	206	147	143	268
895	sgRNA_895	APBB2	GCTGCGAGTGCAGCACGCTG	627	261	238	558	485	480
896	sgRNA_896	APBB2	TGCACTAACTAACATCCAGG	334	348	285	102	114	199
897	sgRNA_897	APC	AGGATGTAATCAGACGACAC	285	509	516	267	550	411
898	sgRNA_898	APC	GGTTCAGAAACAAATCGAGT	326	75	0	189	420	665
899	sgRNA_899	APC	TCAATAGGCGTGTAATGATG	278	398	555	547	696	234
900	sgRNA_900	APC	TCTGTATAAATGGCTCATCG	85	57	163	212	319	423
901	sgRNA_901	APCS	ACTATAGGCTCGAAAACACA	194	449	62	149	250	345
902	sgRNA_902	APCS	CTCCTACAATACCCAAGGCA	844	672	675	579	567	887
903	sgRNA_903	APCS	GGAGAGTATAGTCTATACAT	167	193	576	350	384	143
904	sgRNA_904	APCS	GTGAAAAAGGGTCTGCGACA	650	950	976	879	988	949
905	sgRNA_905	AIRE	AGTTCGAAGACTCCGGCAGT	177	220	75	182	245	264
906	sgRNA_906	AIRE	CCCCGCTCACCGTTCCCGAG	373	567	529	668	607	398
907	sgRNA_907	AIRE	CGCGCTGGCTGACCACGACG	530	210	601	174	493	439
908	sgRNA_908	AIRE	GTGGCGGTACCAAAGCCTTG	0	0	0	0	2	0
909	sgRNA_909	APEH	ATTATGTGGACCTCATCGGG	567	602	401	622	904	659
910	sgRNA_910	APEH	CACAACATCTACCACCACTG	299	0	140	295	416	582
911	sgRNA_911	APEH	GTACGGCGGCCAATACCGGA	349	620	611	492	427	459
912	sgRNA_912	APEH	TTTGCTGTGGACACCCAAGT	726	624	249	657	953	745
913	sgRNA_913	APEX1	ACAGCATATGTACCTAATGC	612	1222	0	237	190	249
914	sgRNA_914	APEX1	ATGCCGTAAGAAACTTTGAG	262	46	285	135	449	318
915	sgRNA_915	APEX1	CCAAGAGCAGATCTTGAGTG	442	747	822	401	579	529
916	sgRNA_916	APEX1	CTGGTCAGCTCCTTCGGACA	534	354	366	479	508	540
917	sgRNA_917	BIRC2	ATATTCAACTTTCCCCGCCG	414	564	367	329	430	492
918	sgRNA_918	BIRC2	ATGCTATGTCAGAACACCGG	386	472	442	111	79	383
919	sgRNA_919	BIRC2	CAAGCTACTATGTTCCAAGG	282	763	549	434	95	240
920	sgRNA_920	BIRC2	TACTCATTGCATAACTGTAG	362	137	245	45	153	242
921	sgRNA_921	BIRC3	ACCCGGAAGTAATGAGTGTG	1123	795	365	531	976	725
922	sgRNA_922	BIRC3	AGGATTAACTAGAACACTAG	323	113	309	167	226	381
923	sgRNA_923	BIRC3	CATGGGTTCAACATGCCAAG	280	230	407	182	322	127
924	sgRNA_924	BIRC3	TTTCGTTATTCATTGCACAG	122	176	0	404	202	315
925	sgRNA_925	XIAP	ATGACAACTAAAGCACCGCA	36	66	112	94	0	72
926	sgRNA_926	XIAP	ATGGATATACTCAGTTAACA	401	350	57	201	247	131
927	sgRNA_927	XIAP	TATCAGACACCATATACCCG	127	211	463	152	33	33
928	sgRNA_928	XIAP	TCTGACCAGGCACGATCACA	268	1449	229	185	353	348
929	sgRNA_929	BIRC5	ATGCGGTGGTCCTTGAGAAA	406	73	201	157	113	265
930	sgRNA_930	BIRC5	CAAGTCTGGCTCGTTCTCAG	9	0	0	25	20	94
931	sgRNA_931	BIRC5	GAACATAAAAAGCATTCGTC	186	696	111	139	0	35
932	sgRNA_932	BIRC5	GCTGCGCCTGCACCCCGGAG	0	0	37	263	110	443
933	sgRNA_933	APLP1	AATGTGAGAGTTCAACCCGG	317	278	199	220	409	130
934	sgRNA_934	APLP1	CCTGCCTAAAGCCGACAGAC	721	1213	1120	253	730	493
935	sgRNA_935	APLP1	CGCACGCAGGTAGCGCCGCA	1062	1065	706	644	919	1219
936	sgRNA_936	APLP1	GGGAAATCAGTGAGCACGAG	439	331	584	573	579	650
937	sgRNA_937	APLP2	AAGGCCTGGAGAATGCGATG	358	247	124	552	344	593
938	sgRNA_938	APLP2	GCACCGCAACCGAATGGACA	255	383	278	387	191	376
939	sgRNA_939	APLP2	GGAACTGGTCTACCCCACAT	173	666	213	90	190	261
940	sgRNA_940	APLP2	TATTGACAACTGGTGCCGGA	619	969	90	288	304	341
941	sgRNA_941	APOA1	CAAGGCGGAGCCTTCAAACT	633	160	427	45	252	300
942	sgRNA_942	APOA1	CCTAAAGCTCCTTGACAACT	171	224	206	488	289	369
943	sgRNA_943	APOA1	GAGCACATCCACGTACACAG	0	44	188	25	135	121
944	sgRNA_944	APOA1	GCTGCGCGCAGAGCTCCAAG	133	237	279	311	436	467
945	sgRNA_945	APOA2	ACAGGCAAAGGAGCCATGTG	720	408	385	1461	869	971
946	sgRNA_946	APOA2	CCCACCTTCAAGGCTGCAGA	231	127	242	144	194	352
947	sgRNA_947	APOA2	GACCGTGACTGACTATGGCA	219	210	765	617	446	666
948	sgRNA_948	APOA2	TGTGGGCAGGAGCTTTGGTT	348	698	384	439	346	571
949	sgRNA_949	APOA4	CAAGATCGACCAGAACGTGG	263	452	119	419	548	643
950	sgRNA_950	APOA4	CAAGATTGACCAGACCGTGG	979	708	941	693	920	1205
951	sgRNA_951	APOA4	GGAGAAGTGAACACTTACGC	334	186	93	616	242	352
952	sgRNA_952	APOA4	TGAGGTGAGCCAGAAGATCG	1199	1345	758	1076	1132	1194
953	sgRNA_953	APOB	AAACTCACTTGTTGACCGCG	948	769	1058	454	1063	1434
954	sgRNA_954	APOB	AAGTCCATGAGTTAATCGAG	708	310	1388	631	867	773
955	sgRNA_955	APOB	GACATGACTTTCCGGCACGT	517	1489	1242	618	560	903
956	sgRNA_956	APOB	GGTCTCTACCACCAAAACGG	662	306	159	195	322	394
957	sgRNA_957	APOBEC1	ATGGATCAACAAAATCGGCA	92	310	267	280	346	347
958	sgRNA_958	APOBEC1	CAAAAACACCACCAATCACG	236	35	244	459	459	274
959	sgRNA_959	APOBEC1	GAGTTTCTGAGTCGGCACCC	542	833	1053	390	1177	600
960	sgRNA_960	APOBEC1	TAGAAGACGTCAAACTCCCA	304	991	262	235	347	481
961	sgRNA_961	APOC1	CCTGTCGCTCCCGGTCCTGG	698	438	850	1034	835	793
962	sgRNA_962	APOC1	CTTCAGCTTATCCAAGGCAC	331	445	323	228	253	187
963	sgRNA_963	APOC1	GTTCTGTCGATCGTCTTGGA	400	784	659	429	344	468
964	sgRNA_964	APOC1	TGGAAACACACTGGAGGACA	475	507	265	375	465	716
965	sgRNA_965	AQP8	CTGCTCCTGGACTGTCACAA	622	617	1226	796	986	843
966	sgRNA_966	AQP8	GCTGTGAGACCCAGTACGGG	381	630	541	550	862	591
967	sgRNA_967	AQP8	GGCGAGTGTCCTGGTACGAA	521	1435	416	704	897	723
968	sgRNA_968	AQP8	GGCTCGTGATTGCCACGCTG	758	647	869	1096	1281	732
969	sgRNA_969	APOC2	ACTCACCAAATCCCAATACC	294	440	47	124	112	166
970	sgRNA_970	APOC2	GCAGGTATGTCTTCTCGTAC	587	371	615	344	549	527
971	sgRNA_971	APOC2	GGAGAGAGATTCCTTCACCT	219	206	146	277	242	264
972	sgRNA_972	APOC2	GGAGGACAAGAAACAGAGCT	138	432	0	62	114	23
973	sgRNA_973	APOC3	CACCAAGTGCTTACGGGCAG	1845	1471	1566	1658	1599	1758
974	sgRNA_974	APOC3	CTGCATGAAGCTGAGAAGGG	858	852	2149	799	1292	1731
975	sgRNA_975	APOC3	GGATGCACTGAGCAGCGTGC	1328	1316	503	1186	573	976
976	sgRNA_976	APOC3	TTTAGGGGCTGGGTGACCGA	1238	1073	777	993	875	1513
977	sgRNA_977	APOC4	CAAAGCTAAAGATGAGTCGC	354	1169	517	318	464	554
978	sgRNA_978	APOC4	CCACCTAGCATGCCAGCCAG	990	1411	864	858	770	748
979	sgRNA_979	APOC4	CCTCCTCAGAAACAGGCTCC	1048	815	613	615	446	661
980	sgRNA_980	APOC4	GTGGTGAACAGGACCAGAGA	356	432	319	429	507	353
981	sgRNA_981	APOD	AAAGATCAAAGTGTTAAACC	88	0	165	54	189	160
982	sgRNA_982	APOD	AGGATCCAGTACGGTGCCGA	107	296	220	231	212	240
983	sgRNA_983	APOD	CTCTGCAGTATCTCGGAAGA	130	55	129	252	117	20
984	sgRNA_984	APOD	GGAACTGTGAATCAAATCGA	191	239	0	183	294	150
985	sgRNA_985	APOE	AGCTGCGCCAGCAGACCGAG	718	117	69	407	375	603
986	sgRNA_986	APOE	CATGCTCGGCCAGAGCACCG	265	0	686	214	309	546
987	sgRNA_987	APOE	GCGGACATGGAGGACGTGTG	745	877	379	215	486	472
988	sgRNA_988	APOE	GGCCTACAAATCGGAACTGG	154	523	639	283	342	173
989	sgRNA_989	APOH	AAGCCGGGCTATGTGTCCCG	401	280	69	156	420	242
990	sgRNA_990	APOH	ACACGAAGTGTTGCAAACGT	1093	1905	538	768	678	1006
991	sgRNA_991	APOH	TTCAAAAGTCGTATAGCGTA	210	657	458	438	364	568
992	sgRNA_992	APOH	TTCCCATCAAGACCAGACAA	226	443	87	153	299	409
993	sgRNA_993	APP	ACATCCGCCGTAAAAGAATG	474	272	311	459	508	425
994	sgRNA_994	APP	CAAGTATCTCGAGACACCTG	280	373	84	300	223	340
995	sgRNA_995	APP	CGGAACTTGTCAATTCCGCA	77	59	139	197	435	127
996	sgRNA_996	APP	GCTGCAGCGAGACCTACCCG	205	73	468	591	684	538
997	sgRNA_997	APRT	CGCCTGCGATGTAGTCGATG	538	279	694	681	826	1267
998	sgRNA_998	APRT	GCTGCGTGCTCATCCGAAAG	577	368	438	808	729	1023
999	sgRNA_999	APRT	TCGCGCCAGGAGGCCGATGG	555	1049	488	425	986	759
1000	sgRNA_1000	APRT	TCTTACCTTCCCGTACTCCA	145	303	234	277	327	280
1001	sgRNA_1001	KLK3	AAAGCGTGATCTTGCTGGGT	904	1511	939	1606	1140	2118
1002	sgRNA_1002	KLK3	ACAATCCGAGACAGGATGAG	482	1073	224	680	882	749
1003	sgRNA_1003	KLK3	AGGAGGCTCATATCGTAGAG	527	628	343	762	843	1099
1004	sgRNA_1004	KLK3	TCTCGTGGCAGGGCAGTCTG	95	0	0	56	10	48
1005	sgRNA_1005	FAS	ATGTGAACATGGAATCATCA	238	620	290	170	365	253
1006	sgRNA_1006	FAS	CAGGATCCAGATCTAACTTG	609	588	795	584	546	497
1007	sgRNA_1007	FAS	GTTGAGACTCAGAACTTGGA	508	523	567	438	655	520
1008	sgRNA_1008	FAS	TAGGGACTGCACAGTCAATG	1057	1048	405	764	1266	683
1009	sgRNA_1009	FASLG	AAAACATCACAAGGAGACAC	0	132	0	71	148	321
1010	sgRNA_1010	FASLG	AGAAAGCAGGACAATTCCAT	285	181	190	305	223	101
1011	sgRNA_1011	FASLG	GGAAGAGCTGAAACATCCCC	34	39	0	75	102	52
1012	sgRNA_1012	FASLG	GGGAAGAACTGTGCCTGGAG	101	219	275	366	232	393
1013	sgRNA_1013	SHROOM2	AGAGAACATCCTCTACACTG	706	944	891	614	914	548
1014	sgRNA_1014	SHROOM2	CCACCGTTCGACGCCCACGT	517	767	594	714	643	844
1015	sgRNA_1015	SHROOM2	GGAGACCAGAGCTCACCGAT	36	132	110	13	115	62
1016	sgRNA_1016	SHROOM2	TCGAGATTATAGATACTCGG	58	34	65	60	93	117
1017	sgRNA_1017	AQP1	ACACCCCACTCACGTCATTG	215	422	448	370	558	579
1018	sgRNA_1018	AQP1	ACTGGGCGATGATGTACATG	413	231	214	350	203	371
1019	sgRNA_1019	AQP1	CTGGGCTTCAAATACCCGGT	203	145	312	82	247	191
1020	sgRNA_1020	AQP1	GCGTGCTGGCTACTACCGAC	86	0	109	195	204	431
1021	sgRNA_1021	AQP2	CACGCCAGCAGACATCCGCG	135	119	176	324	243	419
1022	sgRNA_1022	AQP2	CATGGCAATCTGTAGCACAG	274	170	176	358	224	224
1023	sgRNA_1023	AQP2	GGCAGGCCACAGTCACGGCA	367	82	1060	576	738	436
1024	sgRNA_1024	AQP2	TCTCCGAGCCGCCTTCTACG	48	868	0	0	243	70
1025	sgRNA_1025	AQP3	CAAGCTGCCCATCTACACCC	765	836	754	660	909	932
1026	sgRNA_1026	AQP3	CAGCACACACACGATAAGGG	698	955	499	630	364	751
1027	sgRNA_1027	AQP3	GATGGTGAGGAAACCACCGT	775	308	281	429	808	843
1028	sgRNA_1028	AQP3	TACAACAACCCCGTCCCCCG	753	325	703	780	1481	1039
1029	sgRNA_1029	AQP4	AAAGCCTTTACCGGTCGACA	420	491	368	407	687	283
1030	sgRNA_1030	AQP4	AACCAGGAGACCATGACCAG	216	199	209	259	266	308
1031	sgRNA_1031	AQP4	CAGTGCTTTGGCCATATCAG	176	270	180	491	384	279
1032	sgRNA_1032	AQP4	TGCGATGTAGAAGACAGACT	314	258	215	205	261	465
1033	sgRNA_1033	AQP5	GACAGACAGGCCAATGGACA	324	532	297	465	358	356
1034	sgRNA_1034	AQP5	GCTCAACAACAACACAACGC	4	0	0	35	118	0
1035	sgRNA_1035	AQP5	GGCTGGCATCCTCTACGGTG	93	0	0	77	296	161
1036	sgRNA_1036	AQP5	GGTGCGGCGGGAGTCAGTGG	295	0	23	224	277	334
1037	sgRNA_1037	AQP6	AAAGAACACATACAGCCCCG	193	262	521	85	259	25
1038	sgRNA_1038	AQP6	ACCTACCACGTTGATCCCAA	117	0	57	113	169	193
1039	sgRNA_1039	AQP6	ATGGCAATCTGTAGCACGGA	113	302	427	605	700	344
1040	sgRNA_1040	AQP6	GAGGAAGGCCAGCGTCACGG	151	1162	13	68	150	195
1041	sgRNA_1041	AQP7	ACACCCCGATGATGACCACG	356	907	108	303	246	204
1042	sgRNA_1042	AQP7	AGATCCAGGAAATACTGCAG	542	226	363	210	270	381
1043	sgRNA_1043	AQP7	GCCCAGCGCACAGTTAGCAA	236	17	165	152	214	280
1044	sgRNA_1044	AQP7	GTTCCTGGGCTCCTTCCTGG	69	16	240	267	25	340
1045	sgRNA_1045	AQP9	ATGGCCATTTATGTGGCTGG	731	750	641	584	650	348
1046	sgRNA_1046	AQP9	GACGGTTGCAGCCCCCACAA	1040	454	819	980	1211	1481
1047	sgRNA_1047	AQP9	GATTATGAGGAGTATCATGG	511	543	222	391	281	437
1048	sgRNA_1048	AQP9	TGGTGGAAAACTGCTGATCG	200	0	63	139	121	183
1049	sgRNA_1049	AR	AGGGTACCACACATCAGGTG	1091	1958	1685	948	1175	772
1050	sgRNA_1050	AR	CCTTAAAGACATCCTGAGCG	531	1	394	225	674	520
1051	sgRNA_1051	AR	GGACGCAACCTCTCTCGGGG	549	276	456	641	370	756
1052	sgRNA_1052	AR	TCCAGCTTGATGCGAGCGTG	431	432	329	491	456	491
1053	sgRNA_1053	ABCC6	ACTATGATCCAATCAGCCTG	251	308	653	282	431	196
1054	sgRNA_1054	ABCC6	CAGACCACGATCCAGACGAG	269	190	517	284	254	372
1055	sgRNA_1055	ABCC6	GAGAACTGTGAGAGTCACAA	288	473	18	242	185	405
1056	sgRNA_1056	ABCC6	GGACAGCATCCAATACGGCA	160	343	152	80	96	56
1057	sgRNA_1057	ARAF	AGTGTCCAGGATTTGTCCGG	219	327	352	533	368	577
1058	sgRNA_1058	ARAF	GCCCAACAAGCAACGCACGG	279	42	73	42	187	116
1059	sgRNA_1059	ARAF	GTAGTGATGGAACCCCCCGG	100	521	84	492	178	510
1060	sgRNA_1060	ARAF	TGGTCTACCGACTCATCAAG	190	294	214	267	209	236
1061	sgRNA_1061	ARCN1	ACCATATACAGTTTCTCCAT	67	126	335	106	227	472
1062	sgRNA_1062	ARCN1	AGTACGCTTGCCCATACTAG	210	494	259	510	364	358
1063	sgRNA_1063	ARCN1	ATTCTAGACCCATCCAAATG	81	69	115	162	191	616
1064	sgRNA_1064	ARCN1	GATCCTATTTACCTCTCTGA	13	130	115	128	32	269
1065	sgRNA_1065	TRIM23	ACACACAGTGCAATATACAG	116	258	131	409	740	332
1066	sgRNA_1066	TRIM23	GATCGACAAGTAACAGACCT	553	398	730	658	884	686
1067	sgRNA_1067	TRIM23	TGAAGGAGGAGAACAAATCG	420	564	346	526	888	561
1068	sgRNA_1068	TRIM23	TGCAGACACAGCACATGAGT	635	590	1278	612	710	698
1069	sgRNA_1069	AREG	ATGCAAATATATAGAGCACC	166	65	408	209	195	374
1070	sgRNA_1070	AREG	ATTGTCGATGATTCAGTCAG	894	490	809	696	1021	1278
1071	sgRNA_1071	AREG	GAGGACGGTTCACTACTAGA	105	0	211	186	318	314
1072	sgRNA_1072	AREG	TGGTTCACGCTTCCCAGAGT	261	43	115	85	210	240
1073	sgRNA_1073	ARF1	AGGCTTCAACGTGGAAACCG	264	45	56	192	72	140
1074	sgRNA_1074	ARF1	CACCCAGCTTAAGCTTGTAG	87	15	64	131	52	239
1075	sgRNA_1075	ARF1	TGACAGAGAGCGTGTGAACG	22	0	63	54	69	266
1076	sgRNA_1076	ARF1	TGGAAGTAGTGGCGCCACAG	346	173	274	148	107	617
1077	sgRNA_1077	ARF3	AGAACATCAGCTTTACAGTG	484	535	1741	229	906	787
1078	sgRNA_1078	ARF3	CCTATACAAGCTGAAACTCG	247	147	43	329	207	237
1079	sgRNA_1079	ARF3	GCTGTGCTCTTACCAATGGT	132	582	781	436	536	579
1080	sgRNA_1080	ARF3	TGGAAGTAGTGTCTCCAGAG	648	244	254	364	626	727
1081	sgRNA_1081	ARF4	ACTTCCAGAATACCCAGGTA	290	360	0	418	419	565
1082	sgRNA_1082	ARF4	TAAACTTTCTTACCAATGGT	285	0	240	493	238	488
1083	sgRNA_1083	ARF4	TCAATTCATCTACCAGAAGC	103	207	177	91	221	331
1084	sgRNA_1084	ARF4	TCTGCTTCTTGCCAAATAGT	245	86	676	335	449	411
1085	sgRNA_1085	ARL4D	AGACGGTCTAGTGTTTGTGG	0	0	0	0	39	32
1086	sgRNA_1086	ARL4D	AGCCGGGCCTCGGACAACCA	765	427	745	973	717	1076
1087	sgRNA_1087	ARL4D	CGGGTATAAGAGCGCCACAG	112	453	393	107	274	361
1088	sgRNA_1088	ARL4D	TGATGCCACGCGATCCCCCG	376	219	935	555	596	408
1089	sgRNA_1089	ARF5	AAGCAGATGCGGATTCTCAT	145	100	184	95	102	217
1090	sgRNA_1090	ARF5	GTCACCACCATCCCAACCAT	264	174	366	375	551	473
1091	sgRNA_1091	ARF5	TGCTGATGAACTCCAGAAGA	270	169	220	234	401	153
1092	sgRNA_1092	ARF5	TGTGGTGGACAGTAATGACC	271	684	447	308	101	297
1093	sgRNA_1093	ARF6	CCAAGGTCTCATCTTCGTAG	119	102	0	341	252	193
1094	sgRNA_1094	ARF6	CCTGGCGAGCCTCATCGATG	320	6	23	285	301	529
1095	sgRNA_1095	ARF6	GAAACCCACAGTGGGAATGG	79	0	152	380	346	216
1096	sgRNA_1096	ARF6	GTGTAGTAATGCCGCCAGAG	241	0	558	447	266	340
1097	sgRNA_1097	ARG1	ACTCCACTGACAACCACAAG	120	331	0	49	40	68
1098	sgRNA_1098	ARG1	AGATATACAGGGAGTCACCC	157	396	122	621	513	369
1099	sgRNA_1099	ARG1	AGGCCCTACAGTATTGAGAA	0	83	85	620	178	104
1100	sgRNA_1100	ARG1	GGACAGACTAGGAATTGGCA	142	436	694	74	144	166
1101	sgRNA_1101	ARG2	GATAGTGAATCCACGCTCAG	227	139	0	418	307	604
1102	sgRNA_1102	ARG2	TAGGAGCCCCGTTCTCACAA	297	237	313	566	814	1020
1103	sgRNA_1103	ARG2	TCATAGGTACCACAACTCCC	398	36	136	112	70	74
1104	sgRNA_1104	ARG2	TGATCGACTTGGTATCCAGA	145	43	246	153	180	110
1105	sgRNA_1105	RHOA	AAAACACATCAGTATAACAT	29	0	0	26	149	0
1106	sgRNA_1106	RHOA	ACAGAAATGCTTGACTTCTG	95	355	113	97	316	350
1107	sgRNA_1107	RHOA	CTATGTGGCAGATATCGAGG	221	53	264	137	92	152
1108	sgRNA_1108	RHOA	GCCACTCACCTAAACTATCA	224	63	21	192	28	85
1109	sgRNA_1109	RHOB	CGGTGGGCACGTACACCTCG	107	822	238	131	337	154
1110	sgRNA_1110	RHOB	CTTGCCGTCCACCTCAATGT	505	163	0	277	449	507
1111	sgRNA_1111	RHOB	GAAGCACATGAGAATGACGT	439	300	469	496	515	275
1112	sgRNA_1112	RHOB	GGGACAGAAGTGCTTCACCT	249	650	61	130	277	231
1113	sgRNA_1113	RHOC	AAAGAAGCTGGTGATCGTTG	554	624	1100	450	595	509
1114	sgRNA_1114	RHOC	AGGAAGACTATGATCGACTG	262	0	536	240	309	344
1115	sgRNA_1115	RHOC	CAGCAAGGATCAGTTTCCGG	846	560	276	559	249	1026
1116	sgRNA_1116	RHOC	TGGGGAATAAGAAGGACCTG	298	212	339	346	268	427
1117	sgRNA_1117	RND3	AAATGCAAGATAGTTGTGGT	526	380	868	548	739	801
1118	sgRNA_1118	RND3	GACGCCAGTGTCCTATGACC	554	716	918	411	734	1002
1119	sgRNA_1119	RND3	TCAGCACAGCATCCGAATCA	890	1355	774	526	789	605
1120	sgRNA_1120	RND3	TCTTACCCGAAGTGTCCCAC	291	426	326	469	614	516
1121	sgRNA_1121	RHOG	CCTGAACCTGTGGGACACTG	451	207	962	190	259	323
1122	sgRNA_1122	RHOG	CGCCGTCCTATGAGAACGTG	261	315	218	292	277	195
1123	sgRNA_1123	RHOG	GAAACAGATGACGAAAACGT	144	28	43	204	109	122
1124	sgRNA_1124	RHOG	GCTGTAATTGTCGAACACGG	36	123	340	24	15	144
1125	sgRNA_1125	ARHGAP1	CAGGTGTGTGACAAGTTCCG	242	416	743	134	265	429
1126	sgRNA_1126	ARHGAP1	CCTCGCCAAGTGCTCAAGTG	278	318	255	351	396	579
1127	sgRNA_1127	ARHGAP1	CTTGCGGTCAAACTCCCGGT	851	254	477	673	638	331
1128	sgRNA_1128	ARHGAP1	TAGGAGATGACAAGTATGGG	619	1105	964	602	714	907
1129	sgRNA_1129	ARHGAP4	CGAAACCTTCTACCTCACGG	471	1097	407	352	440	559
1130	sgRNA_1130	ARHGAP4	GCACAAACTCAAGTGCACAA	7	150	0	72	45	94
1131	sgRNA_1131	ARHGAP4	TATAACCAGAGACTCTTTGG	374	365	250	188	144	381
1132	sgRNA_1132	ARHGAP4	TCTGCGTTGAAATGGAGCTG	360	278	404	275	371	760
1133	sgRNA_1133	ARHGAP5	ACTAAATGGATCTCCACACA	158	96	336	134	292	347
1134	sgRNA_1134	ARHGAP5	GCACCCATGTGGTTTAAAGG	131	25	160	109	68	218
1135	sgRNA_1135	ARHGAP5	TCAGTATCATCGGCAAACTG	246	130	440	323	640	548
1136	sgRNA_1136	ARHGAP5	TGCAAATTCGTACTCCGATG	408	247	186	360	527	332
1137	sgRNA_1137	ARHGAP6	AGGGCCACCTACCATGAACA	995	608	954	932	841	833
1138	sgRNA_1138	ARHGAP6	CGGATTTCCACACGACGTAG	1025	998	1032	1091	817	953
1139	sgRNA_1139	ARHGAP6	GAGGTTCCCCTGGGTCGCGG	518	909	426	732	519	721
1140	sgRNA_1140	ARHGAP6	TACGTGAGGAATTTGACCGT	1317	896	616	1104	863	880
1141	sgRNA_1141	ARHGDIA	AGTACATCCAGCATACGTAC	296	129	153	198	184	386
1142	sgRNA_1142	ARHGDIA	CACCTGCGGAAACGGCCACG	330	42	24	311	537	501
1143	sgRNA_1143	ARHGDIA	CAGGCCAGTCACCACGACGT	111	81	52	126	66	254
1144	sgRNA_1144	ARHGDIA	TCATGCCGGACACTATCTCT	370	0	0	209	157	0
1145	sgRNA_1145	ARHGDIB	AAGTACAAGAAAACGCTGCT	963	955	281	630	935	1154
1146	sgRNA_1146	ARHGDIB	CCGGGTGACAACGACATTGG	1156	1237	518	627	730	1049
1147	sgRNA_1147	ARHGDIB	TCAGCACACCTACAGGACTG	538	782	635	738	1007	719
1148	sgRNA_1148	ARHGDIB	TGCCCCGGGACCAATCACCA	520	336	0	326	587	226
1149	sgRNA_1149	ARHGDIG	ACCTGTGAGATCCATGACGA	509	1342	263	279	252	427
1150	sgRNA_1150	ARHGDIG	GGAGCCTGGCCAAGTACAAG	198	205	825	140	332	248
1151	sgRNA_1151	ARHGDIG	GGCCGCTGACAATCTCCCTG	275	187	86	448	507	600
1152	sgRNA_1152	ARHGDIG	TCCAACACCTCGTCCACTGC	124	330	0	177	191	186
1153	sgRNA_1153	RHOH	AGTGTACGAGAACACAGGGG	467	62	321	398	602	667
1154	sgRNA_1154	RHOH	GGTGAAGCGCACCAACAGAG	219	182	314	245	364	472
1155	sgRNA_1155	RHOH	GTTCAGGAATGAGTTATGGT	367	266	647	338	442	654
1156	sgRNA_1156	RHOH	TGGCCACCCAGACTGACCAG	524	480	1237	775	988	1078
1157	sgRNA_1157	ARL1	AGAGTTAGTTGCCATGTTGG	282	57	539	766	640	1063
1158	sgRNA_1158	ARL1	GAATAGTAACATCTCCAGTA	381	416	1122	356	517	363
1159	sgRNA_1159	ARL1	TTCCCGAGTTCCAAACAGAC	164	0	0	123	72	268
1160	sgRNA_1160	ARL1	TTGTAATCTGTACAAAATTG	542	684	417	386	701	871
1161	sgRNA_1161	PHOX2A	AGGCGGTGCTATCGGGCGTG	604	196	1590	427	784	826
1162	sgRNA_1162	PHOX2A	CCCCGACATTTACACGCGTG	1060	1171	1037	453	549	1092
1163	sgRNA_1163	PHOX2A	GCTTCCAATACAGCCCCCTG	162	403	350	628	489	714
1164	sgRNA_1164	PHOX2A	GGCGCCAAAGTCGCCGTAGG	1008	597	859	974	1216	1017
1165	sgRNA_1165	ARL2	AACTACTTTGAGAGCACCGA	337	233	322	290	147	351
1166	sgRNA_1166	ARL2	CATCCTGAAGAAGTTCAATG	16	0	454	30	58	310
1167	sgRNA_1167	ARL2	GATGTTGAAGCCCAGCGTTG	124	194	483	381	138	361
1168	sgRNA_1168	ARL2	GTTCCGCCAGTAGGACCGCA	452	511	549	589	738	734
1169	sgRNA_1169	ARL3	ATCAAAAGTGTACAATCACA	63	0	32	59	66	173
1170	sgRNA_1170	ARL3	CAGCCACATCACACCTACAC	119	154	71	140	108	193
1171	sgRNA_1171	ARL3	CTGAATGTATGGGACATTGG	49	0	205	91	295	167
1172	sgRNA_1172	ARL3	GGAACTAGCGGAATTACTGG	191	246	32	236	565	494
1173	sgRNA_1173	ARNT	AGATGTCTAACGATAAGGAG	160	42	505	349	279	136
1174	sgRNA_1174	ARNT	CAAGCTAACCATCTTACGCA	36	64	0	130	76	81
1175	sgRNA_1175	ARNT	TGGATTGTGTTGGAGAGTGT	343	31	85	26	119	239
1176	sgRNA_1176	ARNT	TGGGGAACCTCACTTCGTGG	125	66	66	84	113	239
1177	sgRNA_1177	BMAL1	CTGGACATTGCGTTGCATGT	1003	556	777	898	1251	1460
1178	sgRNA_1178	BMAL1	GCAGTCGTCCAATTGCGACG	488	346	933	851	716	1056
1179	sgRNA_1179	BMAL1	TTAAAACAGATATAACCCCT	315	439	127	179	336	171
1180	sgRNA_1180	BMAL1	TTAGAATATACAGAACACCA	33	39	313	200	468	333
1181	sgRNA_1181	ARR3	ACTTCAAAGTCAATCCCACA	118	638	193	430	590	798
1182	sgRNA_1182	ARR3	CTCTGCTCAGAGACTATGTG	1000	1438	1111	1505	999	964
1183	sgRNA_1183	ARR3	GCGACTACTGCACAAGCTAG	308	393	261	555	529	554
1184	sgRNA_1184	ARR3	TTAAGTACTCAGGATCAACC	353	192	672	298	372	268
1185	sgRNA_1185	ARRB1	AGGTTCAGTATGCCCCAGAG	280	986	811	340	541	661
1186	sgRNA_1186	ARRB1	CGGTGGGAACGACTGTACGT	224	153	174	258	321	477
1187	sgRNA_1187	ARRB1	TCCTACCTCCTTATCCAGAG	209	467	114	173	448	484
1188	sgRNA_1188	ARRB1	TGAAGTCAAAGCCTTCTGCG	702	1218	461	405	1090	565
1189	sgRNA_1189	ARRB2	CACAGGACACTTGTACTGGG	380	1214	247	244	359	579
1190	sgRNA_1190	ARRB2	CCAAAAGCTGTACTACCATG	173	166	261	195	205	155
1191	sgRNA_1191	ARRB2	CTGGACAAAGTGGACCCTGT	297	135	424	196	469	328
1192	sgRNA_1192	ARRB2	TGTGCGGCTGGTGATCCGAA	505	159	110	515	218	143
1193	sgRNA_1193	ARSA	ACGGGATGCCTAGAAATCGA	356	127	299	435	236	260
1194	sgRNA_1194	ARSA	TGCCGACGACCTCGGCTATG	1240	1713	1082	1081	1217	1345
1195	sgRNA_1195	ARSA	TGGAAAGGGAACGACCTACG	217	527	454	594	861	730
1196	sgRNA_1196	ARSA	TTACGTGAGAGGCATAGTAC	588	162	103	377	389	355
1197	sgRNA_1197	ARSB	ATGGCTTCAAGTATTCCTCA	474	585	748	483	556	328
1198	sgRNA_1198	ARSB	GACCTAGGCTGGAACGACGT	385	703	113	329	409	364
1199	sgRNA_1199	ARSB	GTAGGTATCAAATCCTCGGC	237	271	274	433	499	315
1200	sgRNA_1200	ARSB	TACTGTGTTTCAGATAACGG	507	622	263	574	1106	596
1201	sgRNA_1201	STS	AAGTCAACACGGAGTCTACG	623	926	510	196	234	661
1202	sgRNA_1202	STS	GAGAGACTGCAAGCCCGGAG	969	957	804	827	715	1431
1203	sgRNA_1203	STS	GGAGGTTACCTGATCGGACA	1075	1002	1073	661	707	1114
1204	sgRNA_1204	STS	TCTCACCCAGAGGCTAACGG	0	0	36	0	85	0
1205	sgRNA_1205	ARSD	AGATGGACACAGCCAGTTAG	481	589	837	603	471	674
1206	sgRNA_1206	ARSD	GACATTCCTTCAGATCAGGT	262	1592	689	199	351	554
1207	sgRNA_1207	ARSD	TGGCTTATATGGTGATAATG	263	162	255	278	373	361
1208	sgRNA_1208	ARSD	TGTGAATTGTGCATCCCGCG	478	673	411	586	303	488
1209	sgRNA_1209	ARSL	CAAAATAGGAGCTTGCGAGG	232	123	264	229	222	413
1210	sgRNA_1210	ARSL	GAGACTGACCTGATCGCACA	962	956	82	650	605	770
1211	sgRNA_1211	ARSL	GCTGTATGGGGACAACGTAG	242	39	231	136	120	322
1212	sgRNA_1212	ARSL	GGTTCCCTAGAGAATCAACT	367	434	553	203	343	230
1213	sgRNA_1213	ARSF	CTAATTCCGTGTTACGAGAG	728	756	930	666	1317	1293
1214	sgRNA_1214	ARSF	GATCTGATGTAAAGTAGACA	664	488	420	578	594	702
1215	sgRNA_1215	ARSF	GCACACACCTCTCCCCACCA	1228	542	884	699	900	1041
1216	sgRNA_1216	ARSF	GTATCTTCCCGTCAAGAACG	677	644	1563	521	600	743
1217	sgRNA_1217	ART1	AGAGGTCTCGTCGTGTGATG	260	746	508	469	404	144
1218	sgRNA_1218	ART1	GCCAGCGTACTGGTCATCAA	327	937	471	122	263	514
1219	sgRNA_1219	ART1	GGCTGCAACATGCTTCAGGG	300	12	476	300	336	380
1220	sgRNA_1220	ART1	TCTCCCGGATCTCAACCACA	0	0	0	0	0	0
1221	sgRNA_1221	ART3	AATACCTGAAATGTACGGAC	202	220	288	183	352	123
1222	sgRNA_1222	ART3	AGATGGATAACACAGTGAGC	161	253	57	292	244	284
1223	sgRNA_1223	ART3	CCAGCAATTAGATACTGTGT	237	641	634	469	452	395
1224	sgRNA_1224	ART3	GTTGCTGAGAAAACCTTGTG	460	242	446	454	450	815
1225	sgRNA_1225	ART4	AATGAACGTTCATACTGCTG	293	325	633	257	302	312
1226	sgRNA_1226	ART4	CATGACTACCACACACGCTG	99	0	170	174	303	323
1227	sgRNA_1227	ART4	TATGGAGAAACTAACTCAAG	184	39	55	243	65	64
1228	sgRNA_1228	ART4	TGAGGTGCATTATAGGACGA	258	168	407	95	618	410
1229	sgRNA_1229	ARVCF	AAGATGGTCATCATTGACCA	573	1120	547	477	608	650
1230	sgRNA_1230	ARVCF	CACCTGGCGTACTGTCCGAG	637	614	1074	533	643	600
1231	sgRNA_1231	ARVCF	CGGCCGCATTGGCCTTCACG	186	54	383	146	544	467
1232	sgRNA_1232	ARVCF	GTCACTAGGCTGTTACCTGG	178	773	442	372	271	301
1233	sgRNA_1233	ASAH1	ATAAATACATTCGTGCCAAG	310	53	89	219	98	246
1234	sgRNA_1234	ASAH1	GAACGTTTCAGTATAAATGG	554	511	911	544	791	714
1235	sgRNA_1235	ASAH1	TAAAGGTATATCAGTAACAG	381	367	39	708	295	277
1236	sgRNA_1236	ASAH1	TTTGCTGTGAAAGCCCAAGT	576	106	84	220	455	380
1237	sgRNA_1237	ASCL1	AAACGCCGGCTCAACTTCAG	604	265	357	796	678	944
1238	sgRNA_1238	ASCL1	CCAGGTTGACCAACTTGACG	837	1368	1417	994	944	1270
1239	sgRNA_1239	ASCL1	GCAAAGAAACAGGCTGCGGG	502	902	106	279	280	287
1240	sgRNA_1240	ASCL1	TCTTGTTGGCCGCGCCGTTG	180	316	36	140	74	163
1241	sgRNA_1241	ASCL2	CAGCGCGCGGATGTACTCCA	325	355	161	491	392	426
1242	sgRNA_1242	ASCL2	CCGGCCACCGCAGAGACCGG	448	363	843	500	537	543
1243	sgRNA_1243	ASCL2	CGCAACAGTTCCGGGGACGC	669	938	649	670	942	635
1244	sgRNA_1244	ASCL2	CGGCAGCACGTGCCGCACGG	60	143	177	335	406	356
1245	sgRNA_1245	ASGR1	CAGACACGAACTGCTTCACG	779	1072	1057	1075	966	1307
1246	sgRNA_1246	ASGR1	CCATCAGCTCAGAAAAGGTG	438	320	426	742	767	1433
1247	sgRNA_1247	ASGR1	GAAGTCGCTAGAGTCCCAGC	932	2107	922	743	1039	1116
1248	sgRNA_1248	ASGR1	GTGTGATCGGATCCCAAAGT	974	543	774	760	909	780
1249	sgRNA_1249	ASGR2	CTCCTCGAGCACCCTGACGG	158	175	219	201	317	235
1250	sgRNA_1250	ASGR2	GGTGACAAGATCACATCCCT	425	231	379	628	819	769
1251	sgRNA_1251	ASGR2	GTCAACTGGGTGGAGCACCA	184	718	254	238	369	207
1252	sgRNA_1252	ASGR2	GTGCTTCAGATGGAAGAGCA	245	442	398	455	307	326
1253	sgRNA_1253	ASIP	AACAAGAAATCCAAACAGAT	241	95	179	167	174	321
1254	sgRNA_1254	ASIP	GACATCCAGTAGGTTCACAG	432	660	447	401	451	394
1255	sgRNA_1255	ASIP	TCTCGGAGCTTCTCCTCAGG	80	23	49	95	96	142
1256	sgRNA_1256	ASIP	TTACCCACAATAGAGACAGA	589	399	94	381	130	130
1257	sgRNA_1257	ASL	CAAACTGAACTCCAATGATG	589	401	590	635	750	524
1258	sgRNA_1258	ASL	CACAAAGTCCCGCTCACTAG	442	84	241	138	335	311
1259	sgRNA_1259	ASL	CTACGACCGGCACCTTTGGG	576	1034	400	117	350	470
1260	sgRNA_1260	ASL	TCCTAATGAGCTCCCAGAGG	41	0	142	195	228	584
1261	sgRNA_1261	ASMT	ACCTCACGGCGTCTGCCAGG	676	727	845	881	700	1403
1262	sgRNA_1262	ASMT	CTCCTTAATGACTACGCCAA	338	696	658	453	330	521
1263	sgRNA_1263	ASMT	GTCCAGCGACTACCTGACCA	551	311	1258	728	209	650
1264	sgRNA_1264	ASMT	TGGGAACACTGACAGGTCAA	155	141	253	595	549	592
1265	sgRNA_1265	GET3	CGCATTTCCCGGCATCGATG	721	879	433	359	537	611
1266	sgRNA_1266	GET3	CTGAAGTGGATCTTCGTCGG	687	736	1237	1660	3599	721
1267	sgRNA_1267	GET3	GCCTGACGAGTTCTTCGAGG	368	347	562	238	536	427
1268	sgRNA_1268	GET3	TTCCCCACCATCGTGGAGCG	1231	884	788	1439	1472	1474
1269	sgRNA_1269	ASNS	AACGTTTGATGACAGACAGA	515	678	695	464	783	998
1270	sgRNA_1270	ASNS	CTCCATATGTATCTCTACCC	354	138	262	252	403	285
1271	sgRNA_1271	ASNS	TTCTAGCAGCCAGTAAATCG	76	26	62	277	133	431
1272	sgRNA_1272	ASNS	TTGTCATAGAGGGCGTGCAG	546	126	692	590	525	809
1273	sgRNA_1273	ASPA	ACAACACCACCTCTAACATG	465	262	864	846	477	739
1274	sgRNA_1274	ASPA	ATTTGCCATATGAAGTGAGA	172	227	634	405	599	523
1275	sgRNA_1275	ASPA	GAGGACCAACTTCTATACCT	330	41	255	212	134	162
1276	sgRNA_1276	ASPA	GAGTATTTCTGGTTAAGCAT	552	354	941	534	803	793
1277	sgRNA_1277	ASPH	AACCGAGCATAGTTACCACG	708	625	599	595	798	594
1278	sgRNA_1278	ASPH	AGAAGTAATGAGGTGCTACG	248	450	192	859	625	605
1279	sgRNA_1279	ASPH	TCAAGAGGTATCCCACGCCA	687	540	807	716	658	1300
1280	sgRNA_1280	ASPH	TCTACAGGATTATCCTCAGG	119	80	301	274	389	524
1281	sgRNA_1281	ASS1	ACACCTCGTGCATCCTCGTG	99	215	172	281	290	298
1282	sgRNA_1282	ASS1	ACATCCTACCTTTATCTGGG	366	1020	927	705	444	552
1283	sgRNA_1283	ASS1	TGACCTGATGGAGTACGCAA	486	321	632	104	346	719
1284	sgRNA_1284	ASS1	TGGAATCCTGGAGAACCCCA	504	435	760	468	667	505
1285	sgRNA_1285	ASTN1	AGGGCTGCAATGAAAAGTCG	454	1001	633	556	340	527
1286	sgRNA_1286	ASTN1	CCTTACACAATATTTCAGCG	419	497	857	487	597	449
1287	sgRNA_1287	ASTN1	TGACGTGAGAGGAGCACACG	1244	616	1129	767	969	1026
1288	sgRNA_1288	ASTN1	TGATGATCCTGTATACTCGC	118	61	166	218	180	227
1289	sgRNA_1289	SERPINC1	CAAGTTCCGTTATCGGCGCG	367	531	393	347	766	515
1290	sgRNA_1290	SERPINC1	CAGTTCCCAGACACGCCGGT	609	181	301	129	618	521
1291	sgRNA_1291	SERPINC1	GGCTTCCGAGGGAATGACAT	194	195	439	90	252	134
1292	sgRNA_1292	SERPINC1	GGGGAGCGGTAAATGCACAT	179	207	176	224	247	962
1293	sgRNA_1293	ZFHX3	AGTAGTTACACACCTCGCAG	645	307	357	284	622	683
1294	sgRNA_1294	ZFHX3	CCGTTCGTTTGTGACCCACG	308	216	69	162	368	71
1295	sgRNA_1295	ZFHX3	CGTCTGCAACAAGTTCACGA	115	823	9	59	77	165
1296	sgRNA_1296	ZFHX3	GAGCACGTTAGGCATTAAGG	523	43	484	302	299	424
1297	sgRNA_1297	ATF1	AAGTATCTGCTGTCCATCAG	507	270	395	283	153	540
1298	sgRNA_1298	ATF1	CAACTGTAAGGCTCCATTTG	301	679	423	281	546	434
1299	sgRNA_1299	ATF1	GCGCCGTGCTAGGATCCCGT	126	366	0	317	482	335
1300	sgRNA_1300	ATF1	TTATCTTCTGAAGATACACG	101	24	102	76	257	231
1301	sgRNA_1301	ATF3	CCAGCGCAGAGGACATCCGG	75	278	0	212	238	356
1302	sgRNA_1302	ATF3	GGCAGAAGCACTCACTTCCG	465	1362	382	554	675	526
1303	sgRNA_1303	ATF3	TCAAACACCAGTGACCCAGG	190	228	0	65	178	627
1304	sgRNA_1304	ATF3	TGTCAGCGACAGACCCCTCG	483	729	871	531	540	1457
1305	sgRNA_1305	ATF4	AGATGACCTTCTGACCACGT	419	125	676	219	491	451
1306	sgRNA_1306	ATF4	AGTCCCTCCAACAACAGCAA	122	351	43	130	142	82
1307	sgRNA_1307	ATF4	TAATAAGCAGCCCCCCCAGA	174	27	76	323	232	94
1308	sgRNA_1308	ATF4	TCTCTTAGATGATTACCTGG	28	0	0	0	91	0
1309	sgRNA_1309	ATIC	ACACCACTGTCACTCGAGCG	535	655	504	414	418	602
1310	sgRNA_1310	ATIC	AGTTGGTACATCACAAACAT	157	110	0	236	91	259
1311	sgRNA_1311	ATIC	GCACAAGTTTATAAATCCAG	126	0	499	99	316	51
1312	sgRNA_1312	ATIC	TGAATCTGGTCGCTTCCGGA	235	301	31	88	125	208
1313	sgRNA_1313	ATM	CCAAGGCTATTCAGTGTGCG	509	293	426	624	788	905
1314	sgRNA_1314	ATM	GACCTACCTGAATAACACAC	96	0	200	73	105	218
1315	sgRNA_1315	ATM	TCATCACCAAGTTCGCATGT	892	377	437	735	906	980
1316	sgRNA_1316	ATM	TCTACCCCAACAGCGACATG	666	1095	707	634	898	910
1317	sgRNA_1317	RERE	CAGAGTGGTGTCATCCCGAG	504	350	459	265	312	364
1318	sgRNA_1318	RERE	CAGATGTCGACACTACGCAG	585	335	165	138	254	197
1319	sgRNA_1319	RERE	GTGTGTATATCGAGAGTCGG	150	144	66	136	191	247
1320	sgRNA_1320	RERE	TAGAGAGTTTAAAGCCCGAG	199	55	82	78	73	0
1321	sgRNA_1321	ATOH1	CTCGCCTGCAAAGTTGCAGG	379	0	519	402	871	519
1322	sgRNA_1322	ATOH1	GAGCTGCTACAAACGCCCAG	958	602	948	706	814	700
1323	sgRNA_1323	ATOH1	GCTGTGCAAGCTGAAAGGCG	51	1029	222	229	147	171
1324	sgRNA_1324	ATOH1	GGAATGTAGCAAATACTGGG	421	412	587	416	444	395
1325	sgRNA_1325	ATOX1	TCAATGCAGACCTTCTTGTT	491	153	692	754	687	664
1326	sgRNA_1326	ATOX1	TCAGAAGCACGAGTTCTCTG	518	343	164	368	304	201
1327	sgRNA_1327	ATOX1	TCTCGGGTCCTCAATAAGCT	0	0	0	0	27	0
1328	sgRNA_1328	ATOX1	TTCTCTGTGGACATGACCTG	457	548	245	335	639	405
1329	sgRNA_1329	ATP1A1	ATCCATTCAGGAGTAGTGGG	1170	1037	1073	927	1174	1497
1330	sgRNA_1330	ATP1A1	CCTGCCTCTTACCGTGACAG	239	23	389	221	249	967
1331	sgRNA_1331	ATP1A1	GCAACCAGTTATGATTACAA	107	245	36	143	25	43
1332	sgRNA_1332	ATP1A1	TGGTATTGTTGTCTACACTG	277	154	508	443	459	489
1333	sgRNA_1333	ATP1A2	CATGAGAAGAGATGATCCGG	916	455	1018	591	398	922
1334	sgRNA_1334	ATP1A2	CTGAGGCGAGAGTAGCTATG	849	734	600	681	890	1145
1335	sgRNA_1335	ATP1A2	GTTCGACAACCAAATCCATG	386	1069	572	760	441	562
1336	sgRNA_1336	ATP1A2	TCGGGGCTTCAAATTCGACA	452	471	1433	604	584	784
1337	sgRNA_1337	ATP1A3	ACATGTGGGCGACTGTCATG	558	394	595	540	244	308
1338	sgRNA_1338	ATP1A3	CACTCACGTTGTCACCAGAG	159	633	109	355	217	170
1339	sgRNA_1339	ATP1A3	CTCGGATTCGCCAGTCAGGG	681	407	410	362	275	496
1340	sgRNA_1340	ATP1A3	GCTCTCCATCCATGAGACCG	547	978	434	420	559	447
1341	sgRNA_1341	ATP12A	ACATCGCCTCAACATTGCTG	891	513	704	779	1199	881
1342	sgRNA_1342	ATP12A	CACCATCATGATCAACGGCG	990	1032	1097	586	1042	966
1343	sgRNA_1343	ATP12A	GTCGCTGACAGCAAAACGGA	859	712	679	496	785	926
1344	sgRNA_1344	ATP12A	TGGGTAAACTCAGAGGAGCG	519	484	130	768	980	968
1345	sgRNA_1345	ATP1A4	AAGGAAATCCTGACTCGAGG	257	670	510	649	473	775
1346	sgRNA_1346	ATP1A4	CGCCAGGCCTGACGTCAGGG	541	399	936	737	528	580
1347	sgRNA_1347	ATP1A4	GAGCATCGTACTGTCCGTCG	780	753	1056	688	605	940
1348	sgRNA_1348	ATP1A4	TGATGAAGGGTGCTCCGGAG	503	921	699	449	606	1002
1349	sgRNA_1349	ATP1B1	CCCAGTGAACCGAAAGAACG	873	395	719	1126	885	1133
1350	sgRNA_1350	ATP1B1	CTTGGGATCATTAGGACGAA	412	2843	724	702	1006	837
1351	sgRNA_1351	ATP1B1	TCCAAGGACTCATTCTTGGG	907	472	402	1094	1196	1185
1352	sgRNA_1352	ATP1B1	TGTGGGCTTAAATTCACTGA	622	167	213	1151	718	1130
1353	sgRNA_1353	ATP1B2	AGGAGTTCGTGTGGAACCCG	527	393	875	641	777	1082
1354	sgRNA_1354	ATP1B2	AGTGCTGTAACCATAGTGGG	504	1349	1787	1001	1202	1023
1355	sgRNA_1355	ATP1B2	GTTCGTAATAGCGTCCAGGG	958	1006	305	445	894	532
1356	sgRNA_1356	ATP1B2	TGAGGAACCCATAAAAAACG	26	0	107	132	264	123
1357	sgRNA_1357	ATP1B3	ACTGAATGTATATTCCAATG	286	226	317	588	691	658
1358	sgRNA_1358	ATP1B3	CCAGGAACCCATAAAAAACT	95	133	0	139	0	67
1359	sgRNA_1359	ATP1B3	CGACCACCGGAGAATTCCTG	716	749	69	695	439	957
1360	sgRNA_1360	ATP1B3	GCTTCAGACTCTCAACGATG	304	272	185	93	265	147
1361	sgRNA_1361	FXYD2	ACTGGGTTGTCGATGGACGG	134	393	136	429	502	401
1362	sgRNA_1362	FXYD2	CCAGGCTTACCATAGTAGAA	450	193	347	407	473	785
1363	sgRNA_1363	FXYD2	CTATGAGACCGTTCGCAATG	527	546	438	653	665	786
1364	sgRNA_1364	FXYD2	CTGGACTGGCCTTCATCGTG	1101	472	761	1161	1182	1279
1365	sgRNA_1365	ATP2A1	GCGGTCGATGACGCCCTCAG	865	1362	680	499	475	535
1366	sgRNA_1366	ATP2A1	GGTGGTGAGTGCTGTCTCGG	625	811	555	839	887	888
1367	sgRNA_1367	ATP2A1	TCACCCGGATCCCGGCGTCA	369	1299	162	530	435	473
1368	sgRNA_1368	ATP2A1	TTCAACGACCCCGTCCATGG	420	387	491	420	378	815
1369	sgRNA_1369	ATP2A2	AGATAACAGAAGTACAACCA	68	188	126	101	61	277
1370	sgRNA_1370	ATP2A2	GAGGCCACCTCGATTCTCGG	275	164	167	366	317	436
1371	sgRNA_1371	ATP2A2	GTACACCAAATAAACCAAGC	32	0	0	166	69	0
1372	sgRNA_1372	ATP2A2	GTTCAACTCGAGCAAAACAG	30	0	250	73	0	24
1373	sgRNA_1373	ATP2A3	ATGATCACGGGGGATAACAA	424	390	355	237	202	592
1374	sgRNA_1374	ATP2A3	CCTACTTACAAAGGAGACAA	207	0	0	49	0	0
1375	sgRNA_1375	ATP2A3	GCCGTGTGGGTCATCAACAT	291	270	411	287	308	464
1376	sgRNA_1376	ATP2A3	GGGTACCACGTATACCCCCG	256	904	139	89	159	256
1377	sgRNA_1377	ATP2B1	AGAGGGCTGGAATTACTGTG	763	164	1499	850	628	966
1378	sgRNA_1378	ATP2B1	ATTGATGAAAGCTCATTGAC	483	1354	460	550	463	621
1379	sgRNA_1379	ATP2B1	GGCAAAAGTATTCAGACCAA	334	0	177	322	474	161
1380	sgRNA_1380	ATP2B1	GGTGGATTACCTCGTCACGT	559	261	412	764	846	334
1381	sgRNA_1381	ATP2B2	CCCAACGGACAAGCATACCC	584	752	565	336	291	481
1382	sgRNA_1382	ATP2B2	CTGTACCACTGTCATGCGAT	149	332	64	324	164	157
1383	sgRNA_1383	ATP2B2	GCAGGAACAGAAATTTACCG	382	664	133	166	151	169
1384	sgRNA_1384	ATP2B2	TGGGCTCCGCACTATCTGCG	406	513	736	903	433	429
1385	sgRNA_1385	ATP2B3	AACAGCAATGGCGAACTCCG	441	59	325	233	247	71
1386	sgRNA_1386	ATP2B3	CTGGACCACGGTCATACGGT	270	268	389	263	275	187
1387	sgRNA_1387	ATP2B3	TCCCACCGACAAGCACACAC	148	173	81	16	64	207
1388	sgRNA_1388	ATP2B3	TGTCTGGGAATTCACGCCAA	271	171	140	57	258	182
1389	sgRNA_1389	ATP2B4	CCAGGAGGGAATCGACAATG	63	186	0	281	363	275
1390	sgRNA_1390	ATP2B4	CGATACAGGTCAGTTCGGTG	510	25	306	271	393	474
1391	sgRNA_1391	ATP2B4	TAGACTGAAAACCTCCCCTG	846	423	835	668	764	1039
1392	sgRNA_1392	ATP2B4	TGTGCGTAATGAAGTGCCCG	523	0	74	493	551	518
1393	sgRNA_1393	ATP4A	GATCAACGCTGACCAACTGG	583	479	1670	492	404	313
1394	sgRNA_1394	ATP4A	GGGATGGGCCCAACGCACTG	618	567	714	396	975	754
1395	sgRNA_1395	ATP4A	GGGGGCTTCACAGACCCTCA	1374	598	1423	638	891	1378
1396	sgRNA_1396	ATP4A	TGGCTATGCCTTCGACGTAG	616	964	329	562	756	945
1397	sgRNA_1397	ATP4B	AGGCGTGGAGAGTCTGTGTG	331	1183	403	209	423	443
1398	sgRNA_1398	ATP4B	CTTAAGGCCGGATGTTTACG	659	359	209	495	610	405
1399	sgRNA_1399	ATP4B	GACAGTGGACCCGTACACAC	439	397	529	392	591	546
1400	sgRNA_1400	ATP4B	GGCCTGGCGGATCCCAACTT	340	385	723	312	428	402
1401	sgRNA_1401	ATP5F1A	AAATTCGAGGAATGATACCG	625	1229	532	303	519	462
1402	sgRNA_1402	ATP5F1A	ACCAACTGGAACGTCCACAA	392	330	98	190	284	143
1403	sgRNA_1403	ATP5F1A	AGGATAGGCCTCACGACCAG	237	191	107	174	336	297
1404	sgRNA_1404	ATP5F1A	TTATTGGTGACCGACAGACT	389	20	341	346	401	363
1405	sgRNA_1405	ALDH7A1	ACTCACCAGTCGCCTCGCAG	442	143	20	410	307	107
1406	sgRNA_1406	ALDH7A1	ATTCTTAATTTAGGCCAGTG	413	324	353	704	409	546
1407	sgRNA_1407	ALDH7A1	ATTGAGCAGTGGAATCCCGT	808	127	583	420	811	538
1408	sgRNA_1408	ALDH7A1	GGGCTCCGCGAGGAAAACGA	62	0	214	63	215	200
1409	sgRNA_1409	ATP5F1B	CTGCATAGTACCCATGTCAG	376	869	467	574	943	997
1410	sgRNA_1410	ATP5F1B	GCACCAATCAAAATTCCTGT	234	36	371	279	142	129
1411	sgRNA_1411	ATP5F1B	GGTGGACGTCCAGTTTGATG	0	0	0	37	92	0
1412	sgRNA_1412	ATP5F1B	GTTGGTGAGAGGACCCGTGA	221	214	320	259	473	290
1413	sgRNA_1413	ATP5F1C	ACCACACAGTCCTCGATCTG	533	188	889	313	480	756
1414	sgRNA_1414	ATP5F1C	ATGAAAAAGCTGATATCAAG	95	241	0	70	95	203
1415	sgRNA_1415	ATP5F1C	CAAGTCTATGAAAATGGTAG	175	162	32	168	310	145
1416	sgRNA_1416	ATP5F1C	TATTTCGAACTTGAATCCTG	65	0	0	165	112	181
1417	sgRNA_1417	ATP5F1D	CAACAACTGCACCGAAGAGT	331	1017	435	402	321	660
1418	sgRNA_1418	ATP5F1D	CCACGCCCGTGCCTATGCCG	247	387	422	309	315	468
1419	sgRNA_1419	ATP5F1D	CCCATTCCCCCAGTGAGCAG	420	233	327	576	574	872
1420	sgRNA_1420	ATP5F1D	CGCAGCGCCCGAACCTGCGT	697	1079	135	489	622	356
1421	sgRNA_1421	ATP5F1E	ACTGGAGACAGGCTGGACTC	146	437	36	282	366	247
1422	sgRNA_1422	ATP5F1E	GAGACAGGCTGGACTCAGGT	647	899	366	367	559	431
1423	sgRNA_1423	ATP5F1E	GAGTCCAGCCTGTCTCCAGT	140	436	51	294	344	296
1424	sgRNA_1424	ATP5F1E	TTGCACAGATCTGGGAGTAT	1374	425	568	592	885	464
1425	sgRNA_1425	ATP5PB	AGCCCAGTTCCGAGTACATA	243	322	178	467	221	763
1426	sgRNA_1426	ATP5PB	CAACAAGGACCTTTCATACA	36	57	202	133	133	214
1427	sgRNA_1427	ATP5PB	CTTTGCTGATAAACTCAATG	69	61	122	229	273	280
1428	sgRNA_1428	ATP5PB	TCGTTATGGACTGATCCCTG	403	226	151	447	366	359
1429	sgRNA_1429	ATP5MC1	AATGTCCCGGGAGACAACAC	227	81	0	19	23	28
1430	sgRNA_1430	ATP5MC1	ATTCACTGGGCTATTCAAGA	82	109	375	16	141	83
1431	sgRNA_1431	ATP5MC1	CAGATCCGCTGTTGTACCAG	283	432	107	459	186	239
1432	sgRNA_1432	ATP5MC1	CAGCAACTTCCCACTCCAGG	339	209	351	67	329	552
1433	sgRNA_1433	ATP5MC2	ACCGGAGATACTGACAGATG	201	484	501	524	493	375
1434	sgRNA_1434	ATP5MC2	AGAACCAGCCACCCCAACTG	318	57	364	612	275	397
1435	sgRNA_1435	ATP5MC2	GATGTCCCTTGAAATGGCGC	514	525	263	359	330	380
1436	sgRNA_1436	ATP5MC2	GCACCACTGCAGATAGCGGA	284	1438	211	155	569	452
1437	sgRNA_1437	ATP5MC3	ATCAGTGTTATCTCGACCAG	580	758	166	536	315	563
1438	sgRNA_1438	ATP5MC3	CATTAAATACCGTAGAGCCC	397	934	338	278	240	148
1439	sgRNA_1439	ATP5MC3	GCCTGGGCTACGCACCAGAG	200	111	279	262	232	565
1440	sgRNA_1440	ATP5MC3	TGTGTCTCAGCTAATCCAAA	145	37	114	211	101	141
1441	sgRNA_1441	ATP5ME	AACAGATTACCTAAAACCTC	42	89	37	62	124	74
1442	sgRNA_1442	ATP5ME	CGAGGAACAGGGCGGAGTAG	51	19	744	80	89	195
1443	sgRNA_1443	ATP5ME	CGGTCACTCACTGTAGCGCG	719	725	952	805	581	1006
1444	sgRNA_1444	ATP5ME	GTAGGCCACACCGAGGAACA	1013	1094	1448	431	1065	467
1445	sgRNA_1445	ATP5PF	CCTCCGCAAATGGACTGAGA	333	95	270	182	264	292
1446	sgRNA_1446	ATP5PF	GACGGCTGACCGAATGACAG	437	214	101	281	683	234
1447	sgRNA_1447	ATP5PF	TACTCTGAACTAGCATCAAC	55	156	58	109	63	136
1448	sgRNA_1448	ATP5PF	TCCACAAAGAGTTTCTGTAT	485	40	655	477	743	470
1449	sgRNA_1449	ATP6V1A	AGTGGTTACAGCCTGTGACA	861	426	314	666	420	873
1450	sgRNA_1450	ATP6V1A	ATGTTACCCCCACGAAACAG	76	79	0	184	95	77
1451	sgRNA_1451	ATP6V1A	GTAATCATCTATGTAGGATG	181	122	332	418	263	761
1452	sgRNA_1452	ATP6V1A	TGACTGCTGATATCCGACAA	127	83	0	367	169	360
1453	sgRNA_1453	ATP6V1B1	AGCCCGAGAACACATGCAGG	438	68	174	332	673	626
1454	sgRNA_1454	ATP6V1B1	CCGTCTGAATCATCTCCTCG	656	669	17	660	438	577
1455	sgRNA_1455	ATP6V1B1	CCTCTGACACCGGAGTTCGT	256	994	106	71	223	137
1456	sgRNA_1456	ATP6V1B1	GCTACACCTCCAGGATCGAG	147	554	335	326	472	435
1457	sgRNA_1457	ATP6V1B2	CTCTGATACTCACTGAGGCG	271	145	561	181	203	266
1458	sgRNA_1458	ATP6V1B2	TCAATGTCGAATCTACCCAG	45	0	52	166	120	127
1459	sgRNA_1459	ATP6V1B2	TGCTGGGCTACCACACAATG	40	27	0	329	30	373
1460	sgRNA_1460	ATP6V1B2	TGGGGATATTCTCCGAACAC	0	47	0	112	50	74
1461	sgRNA_1461	ATP6V0C	CAAGAGCGGTACCGGCATTG	686	71	812	569	788	1214
1462	sgRNA_1462	ATP6V0C	CATTCAGGGAGTTGGCGATG	492	175	672	351	361	528
1463	sgRNA_1463	ATP6V0C	TCGGCCGCCATGGTCTTCAG	358	162	209	535	608	853
1464	sgRNA_1464	ATP6V0C	TGATGCCAGCCATGACCACT	1011	1010	578	1112	1136	1513
1465	sgRNA_1465	ATP6V1C1	ACTGCTTAATCCAGTCGTTG	265	41	238	429	273	133
1466	sgRNA_1466	ATP6V1C1	ATCAACTGCCTTCCTAAACA	208	172	262	201	164	25
1467	sgRNA_1467	ATP6V1C1	GAGAATCTGTTGGCTAATGG	559	33	249	387	726	499
1468	sgRNA_1468	ATP6V1C1	TAAGAAAGTAGCTCAATACA	130	123	213	357	249	323
1469	sgRNA_1469	ATP6V1E1	AGTTCAACATAGAGAAAGGT	122	145	61	80	237	225
1470	sgRNA_1470	ATP6V1E1	AGTTCTTTACCTTTACCAGA	191	255	37	145	132	200
1471	sgRNA_1471	ATP6V1E1	CTGCAACGAACAATCATTCG	99	201	213	251	188	177
1472	sgRNA_1472	ATP6V1E1	TAAGGTCATCTCTTGCTCTG	556	62	401	328	540	394
1473	sgRNA_1473	ATP6V0B	CCCAGGTTGGACCACATGAA	625	612	234	213	239	427
1474	sgRNA_1474	ATP6V0B	GCCGGTAATATAGATGCCCC	63	0	135	333	51	383
1475	sgRNA_1475	ATP6V0B	GGCCATCGGAACTACCATGC	148	0	466	285	127	485
1476	sgRNA_1476	ATP6V0B	TTTGGGCTTCCGCTTTGATG	251	49	285	359	489	524
1477	sgRNA_1477	ATP6V1G2	ATTCGTGCTCTCGCTCTCTG	952	670	481	585	627	613
1478	sgRNA_1478	ATP6V1G2	CAGAAGCTGCTGGATACCTT	451	1100	551	321	530	964
1479	sgRNA_1479	ATP6V1G2	CCCAGGCCATGGGCTCCCAG	963	504	1640	690	839	724
1480	sgRNA_1480	ATP6V1G2	GCGACTGAAGCAGGCAAAGG	1101	572	350	417	404	219
1481	sgRNA_1481	ATP6V0A1	AAAGGTTCTGAATCAAACGG	725	204	1022	549	677	958
1482	sgRNA_1482	ATP6V0A1	AACATTCCGATTATGGACAC	743	956	1616	927	1110	880
1483	sgRNA_1483	ATP6V0A1	ATTGCATCATCAGCAGATGG	589	316	500	351	442	299
1484	sgRNA_1484	ATP6V0A1	GTCCAATTATAAGTAAACAT	0	0	0	24	0	34
1485	sgRNA_1485	ATP6AP1	CGAAGATGTCCCATACACAG	267	124	164	168	233	243
1486	sgRNA_1486	ATP6AP1	GCCGCCAACGACAAAAACAC	115	0	0	100	85	38
1487	sgRNA_1487	ATP6AP1	GCTGACTGCATACCAGTCGA	649	161	92	258	265	574
1488	sgRNA_1488	ATP6AP1	GTTACAATGACACCGCTCCC	824	575	221	295	612	974
1489	sgRNA_1489	ATP7A	AAATTCATAACAGACAATCC	218	18	493	229	479	267
1490	sgRNA_1490	ATP7A	AATTACAATCCATACCAAGA	84	581	96	268	176	236
1491	sgRNA_1491	ATP7A	CAATAGAGGCTGTATCACCG	578	675	1296	448	325	586
1492	sgRNA_1492	ATP7A	CTTTACTCTCCATACAGGGG	558	913	459	830	630	658
1493	sgRNA_1493	ATP5PO	ACCATGATGAGTGTCCATCG	132	29	215	154	378	416
1494	sgRNA_1494	ATP5PO	ATACCGTATACCTGAACAGG	425	659	228	725	1023	586
1495	sgRNA_1495	ATP5PO	CTGATCAGATTGGTAGTGAG	762	168	691	337	498	765
1496	sgRNA_1496	ATP5PO	GGTCGATTAAGCAATACCCA	341	549	87	343	652	215
1497	sgRNA_1497	ATP7B	AGGGACCATGTAAATGACAT	153	991	368	110	339	310
1498	sgRNA_1498	ATP7B	ATGAACTGAGCTATCTCGAG	422	541	278	368	306	111
1499	sgRNA_1499	ATP7B	CTCACCAAGGGTCACAACGG	134	315	446	218	361	629
1500	sgRNA_1500	ATP7B	CTCATTAAAGCTACCCACGT	130	508	288	213	239	379
1501	sgRNA_1501	ATR	CTGTGTGAGATGGTCAAGCA	83	1094	153	224	519	560
1502	sgRNA_1502	ATR	GATGCTTTGATTTATATGCA	226	28	160	210	299	230
1503	sgRNA_1503	ATR	GCCCAGGTCACCAATTGTGG	157	160	512	203	194	384
1504	sgRNA_1504	ATR	TGACGTGCGAAAACAAGATG	318	237	75	230	232	354
1505	sgRNA_1505	ATRX	AATTAGTGCGGAATAAGAGT	90	84	28	91	98	219
1506	sgRNA_1506	ATRX	ATGATTTAAAGACTCAGGCG	57	158	153	123	90	118
1507	sgRNA_1507	ATRX	CTTACCAAGGCCCATACAGT	191	198	145	88	511	281
1508	sgRNA_1508	ATRX	GAAAATCTCAAAAAACGCGG	26	30	74	31	87	45
1509	sgRNA_1509	KIF1A	AGGACCAGTACCGCCGCGAG	94	89	0	257	139	209
1510	sgRNA_1510	KIF1A	ATTGCCACACGGTGTACCAG	379	116	979	399	268	589
1511	sgRNA_1511	KIF1A	CAAACAAGATGCGCTCGTGG	393	43	65	186	258	287
1512	sgRNA_1512	KIF1A	GTCAACACGGAATCTCGGTA	296	162	40	203	157	578
1513	sgRNA_1513	AUH	AAAATGAGTTCCAGTGAAGT	611	712	501	567	802	906
1514	sgRNA_1514	AUH	ACCTGCTACTCGTATATCAC	143	70	0	238	447	316
1515	sgRNA_1515	AUH	ATACCAGCACAGAATATCCC	651	466	508	512	725	535
1516	sgRNA_1516	AUH	GAACTACTCATACCTCCACC	681	644	495	163	351	373
1517	sgRNA_1517	AUP1	CAGGGGTCTCTGAACTTGCA	197	788	304	489	309	407
1518	sgRNA_1518	AUP1	GACCAGCACACAAAGCTGGG	555	0	465	502	333	250
1519	sgRNA_1519	AUP1	GTGTCCCCAGATTCGTAGTG	1174	1125	1065	731	1081	2047
1520	sgRNA_1520	AUP1	TCCTGTTCATCGCCAACTAG	138	0	113	133	96	420
1521	sgRNA_1521	AVP	CAAGAGGGCCATGTCCGACC	546	336	762	226	299	277
1522	sgRNA_1522	AVP	GCAGTTCTGGAAGTAGCACG	623	183	190	470	919	522
1523	sgRNA_1523	AVP	GTCGTTGCAGCAAACGCCGA	264	169	0	30	138	100
1524	sgRNA_1524	AVP	TCGTCCGCGCAGCAGATGCT	238	87	312	95	374	181
1525	sgRNA_1525	AVPR1A	ACCGAGGGACGTGCGCAACG	719	2528	1261	1078	1138	1644
1526	sgRNA_1526	AVPR1A	GACAGCCGACCGCTACATCG	677	576	969	414	1061	1476
1527	sgRNA_1527	AVPR1A	GACATCACCTACCGCTTCCG	723	249	633	799	1203	1237
1528	sgRNA_1528	AVPR1A	TGCATGCGGGACGTCTTGCG	1109	1045	532	1007	1259	1071
1529	sgRNA_1529	AVPR1B	AAAAAATGAAGACTTGAGGG	120	84	120	223	260	483
1530	sgRNA_1530	AVPR1B	AAACCTAAAAGTCAAGACAC	700	2224	359	563	451	653
1531	sgRNA_1531	AVPR1B	CAGAACGAAGATAGCCAGGG	699	1755	1295	1179	1253	1596
1532	sgRNA_1532	AVPR1B	GCAGCATCAACACCATCTCA	151	65	471	210	209	463
1533	sgRNA_1533	AVPR2	ATACTTCACGGCCCGACACA	963	545	554	747	791	757
1534	sgRNA_1534	AVPR2	CAGGCGGCGATACCCAGGGT	1087	1127	272	895	557	711
1535	sgRNA_1535	AVPR2	GGCGTACCGCCATGGAAGTG	2120	1469	2164	1188	1634	1795
1536	sgRNA_1536	AVPR2	TGGCCAATGAAGACGTGTAT	1151	1702	978	755	917	1226
1537	sgRNA_1537	AXL	CCCGAAGCCAATGTACCTCG	66	183	135	164	40	177
1538	sgRNA_1538	AXL	CCTAGCAGTACATACCACCA	433	656	1442	307	640	581
1539	sgRNA_1539	AXL	CGAAGCCCATAACGCCAAGG	913	1268	761	725	821	1226
1540	sgRNA_1540	AXL	CTGAGAACATTAGTGCTACG	570	501	347	754	783	855
1541	sgRNA_1541	AZGP1	GACAGGAAGTCTCAGCCCAT	1628	515	1417	806	760	1502
1542	sgRNA_1542	AZGP1	GGAGGTCATTGAGTGAGCCA	569	587	1001	823	718	965
1543	sgRNA_1543	AZGP1	GGTATTTCCGCAGAGTCGCA	354	529	55	131	343	281
1544	sgRNA_1544	AZGP1	TCAGGGTCTCACGTATTGCA	660	267	1128	854	613	955
1545	sgRNA_1545	AZU1	CCGCCAACGATGTCCAAAAG	160	660	455	625	790	1158
1546	sgRNA_1546	AZU1	GCACCACGGTGCTAACCCCG	305	389	240	244	273	495
1547	sgRNA_1547	AZU1	GCCTCTGCAGAACGCCACGG	510	195	123	728	679	530
1548	sgRNA_1548	AZU1	TGGCCGCGGTCATCACGAAG	443	339	535	294	640	480
1549	sgRNA_1549	B2M	AAGTCAACTTCAATGTCGGA	364	258	551	444	513	363
1550	sgRNA_1550	B2M	ACCCAGACACATAGCAATTC	0	0	0	260	23	244
1551	sgRNA_1551	B2M	CTGAATCTTTGGAGTACCTG	597	277	439	447	604	489
1552	sgRNA_1552	B2M	GAGTAGCGCGAGCACAGCTA	129	40	328	375	334	132
1553	sgRNA_1553	BAAT	CAAACAAATCAATTACCCCT	75	405	64	154	186	347
1554	sgRNA_1554	BAAT	GACTTTGGAGAGGTGGTATG	539	397	705	720	470	584
1555	sgRNA_1555	BAAT	GAGACCAGAAGAGACCCATG	183	357	25	119	215	98
1556	sgRNA_1556	BAAT	GGTCCCATTAATAAGTACCG	108	207	419	119	212	265
1557	sgRNA_1557	BACH1	AACTGACAGAGTCCGTACTG	78	123	283	87	307	149
1558	sgRNA_1558	BACH1	CCTGGCCTACGATTCTTGAG	539	249	243	913	735	880
1559	sgRNA_1559	BACH1	CTAATCCTGATACCTAACCA	188	1599	174	269	276	480
1560	sgRNA_1560	BACH1	GAAATCCGACTTGGGCACCA	480	567	1	143	430	213
1561	sgRNA_1561	BAD	CATAGCGCTGTGCTGCCCAG	814	286	803	381	424	365
1562	sgRNA_1562	BAD	GCCACAGCTCCTACCCCGCG	147	238	0	188	285	143
1563	sgRNA_1563	BAD	GGTGACTGGCGTCCCACAGG	105	29	124	99	271	494
1564	sgRNA_1564	BAD	TGGGGTACTTACCTCCATGA	280	44	99	264	202	423
1565	sgRNA_1565	BAG1	GGAGTCGACCCGGAGCGAGG	146	124	29	264	363	155
1566	sgRNA_1566	BAG1	GGGCATGACCGACCCACCAG	739	318	1858	547	525	645
1567	sgRNA_1567	BAG1	TGAACCAGTTGTCCAAGACC	462	491	1023	343	583	247
1568	sgRNA_1568	BAG1	TGTATTCCAAGTGCTGACAA	76	120	170	72	251	253
1569	sgRNA_1569	ADGRB1	CAGGATGAGTACCGGCAGTG	771	577	1105	1021	1170	1570
1570	sgRNA_1570	ADGRB1	CCCACGATGAGCGTCACCGA	731	471	125	719	594	479
1571	sgRNA_1571	ADGRB1	CCTGTGGGGCGAATGCACGC	1071	988	1126	626	1017	777
1572	sgRNA_1572	ADGRB1	GAAGCATCCGTGTTTGTGGT	878	638	1487	1087	1133	686
1573	sgRNA_1573	ADGRB2	ATCATCAGCCGAGGGCACGT	390	622	307	160	355	284
1574	sgRNA_1574	ADGRB2	CAGCCACTGATAGCAAGTGG	1127	1600	1443	475	837	967
1575	sgRNA_1575	ADGRB2	CTCTCTCGTAGGCGACCCGG	521	587	572	415	627	739
1576	sgRNA_1576	ADGRB2	TGAGCAAGACCTCGACAAAG	330	194	261	250	168	259
1577	sgRNA_1577	ADGRB3	AGGCGAATAAGGACCTGTCA	451	774	483	303	452	602
1578	sgRNA_1578	ADGRB3	AGGGTCAATAGAGTTAATGC	211	32	0	156	82	268
1579	sgRNA_1579	ADGRB3	CCAAGTCTGCAATCTTACCA	704	494	697	419	452	399
1580	sgRNA_1580	ADGRB3	TACAGTACACGGAGTATGGG	462	1694	997	424	741	1029
1581	sgRNA_1581	BAK1	AAGACCCTTACCAGAAGCAG	932	161	704	811	483	657
1582	sgRNA_1582	BAK1	ACGGCAGCTCGCCATCATCG	319	498	156	560	626	507
1583	sgRNA_1583	BAK1	GCTCACCTGCTAGGTTGCAG	1143	565	882	663	421	469
1584	sgRNA_1584	BAK1	GGTAGACGTGTAGGGCCAGA	350	431	950	285	657	521
1585	sgRNA_1585	NKX3-2	AACAAGAAAGAGGAGCGCGG	72	60	42	67	50	68
1586	sgRNA_1586	NKX3-2	CCGGTACCAGAACAGCTGCG	315	353	446	243	503	359
1587	sgRNA_1587	NKX3-2	CGGACACGTGTGCACCTCTG	366	186	1112	546	877	518
1588	sgRNA_1588	NKX3-2	GGCTCAAGGATCCCCCCGCA	117	99	95	489	229	478
1589	sgRNA_1589	BARD1	ATGTCCAGTGTGTTACACCC	615	89	705	341	319	559
1590	sgRNA_1590	BARD1	GACTGGAAAGTCTATTGTGA	211	539	190	276	201	356
1591	sgRNA_1591	BARD1	GCTGTGAAAAGAAATCATAG	228	69	161	0	46	31
1592	sgRNA_1592	BARD1	GTAAAGTTGGTGGTACATCA	786	809	473	789	381	601
1593	sgRNA_1593	BAX	AGTAGAAAAGGGCGACAACC	525	554	539	816	908	1797
1594	sgRNA_1594	BAX	GGACGAACTGGACAGTAACA	627	722	259	412	1040	1159
1595	sgRNA_1595	BAX	GTTTCATCCAGGATCGAGCA	30	151	118	436	143	237
1596	sgRNA_1596	BAX	TCGGAAAAAGACCTCTCGGG	146	227	481	276	219	270
1597	sgRNA_1597	BBS1	AGCGCTGGCAGATTTACATG	424	636	223	410	229	707
1598	sgRNA_1598	BBS1	CAGAAACCTCTAGGAAGACG	337	462	201	198	359	183
1599	sgRNA_1599	BBS1	GCTGGAGCTAAGTGAAATGG	208	271	322	475	334	496
1600	sgRNA_1600	BBS1	TCTTATACACATAGACACAA	63	37	0	29	92	160
1601	sgRNA_1601	BBS2	AGAGAAACATCAGATTCCAG	21	546	179	182	85	220
1602	sgRNA_1602	BBS2	ATTGGCCAGTCCACTGAACG	185	228	67	163	364	213
1603	sgRNA_1603	BBS2	TGCTCGAAGTGACCGAACTG	520	217	552	357	557	546
1604	sgRNA_1604	BBS2	TTGCCACCAATAATCGCAAG	36	14	108	164	179	158
1605	sgRNA_1605	BBS4	AAATAGGAAACTCTGGAGCT	132	27	305	59	132	42
1606	sgRNA_1606	BBS4	GCTGCATGGTCAAATGGACA	103	274	287	277	181	146
1607	sgRNA_1607	BBS4	GGCAACATCAAAGTCCCCGT	355	624	203	209	143	109
1608	sgRNA_1608	BBS4	TTGAGGTTATCAGCACTCTG	156	94	695	542	252	339
1609	sgRNA_1609	BCAT1	ACCTCAGTTCCAATGAATGT	82	80	0	199	358	207
1610	sgRNA_1610	BCAT1	CACGGATCATATGCTGACGG	140	65	244	351	119	189
1611	sgRNA_1611	BCAT1	GTTTCAGCCAAACCTCAACA	251	123	405	225	281	186
1612	sgRNA_1612	BCAT1	TTGAAAAATAAGGTCCCACT	599	240	246	590	876	664
1613	sgRNA_1613	BCAT2	AAATGTCTTCCCAAACACCA	244	80	99	288	344	440
1614	sgRNA_1614	BCAT2	ACGAACAGGAGCGCGCGCGT	879	1116	278	1077	951	1023
1615	sgRNA_1615	BCAT2	GGTCGGGCCCATACAGCCAG	506	1817	1120	596	916	1178
1616	sgRNA_1616	BCAT2	TCGGCAACTACAAGTTAGGT	1181	1268	1195	572	821	823
1617	sgRNA_1617	BCHE	AGTAAACTTTGGTCCGACCG	720	620	472	496	586	426
1618	sgRNA_1618	BCHE	AGTGTCAATGAACTATAGGG	83	33	376	265	176	346
1619	sgRNA_1619	BCHE	GATATAAACAGTCTTCACTG	219	499	0	42	249	204
1620	sgRNA_1620	BCHE	TTGAATCGAAGTCTACCAAG	129	176	328	156	121	695
1621	sgRNA_1621	BCKDHA	CATCTGTTACTTCGGCGAGG	602	647	780	774	660	769
1622	sgRNA_1622	BCKDHA	CATGACACTGCTTAACACCA	183	137	105	290	364	429
1623	sgRNA_1623	BCKDHA	CTTATCTATAAACTCCGCCG	459	390	0	185	187	235
1624	sgRNA_1624	BCKDHA	GGGCCATGAATAGTTCCAGG	729	1111	315	420	346	615
1625	sgRNA_1625	BCKDHB	AATTCCTTGTTCACACAATG	149	364	340	348	422	501
1626	sgRNA_1626	BCKDHB	CAAGTATCGCTATCGCTCTG	691	448	950	910	689	852
1627	sgRNA_1627	BCKDHB	GGCCGCATCCTCGACAGTCG	354	556	112	198	214	291
1628	sgRNA_1628	BCKDHB	TTTGGCCAATGAGTTATCCA	911	1096	320	428	717	436
1629	sgRNA_1629	CCND1	AGAGGCCACGAACATGCAAG	644	722	541	523	377	419
1630	sgRNA_1630	CCND1	CGTGCCTCCGTAGGTCTGCG	376	115	550	501	506	587
1631	sgRNA_1631	CCND1	GGTTGGCATCGGGGTACGCG	157	335	428	279	124	299
1632	sgRNA_1632	CCND1	GTGTTCAATGAAATCGTGCG	287	539	682	55	371	231
1633	sgRNA_1633	BCL2	CTGACGCCCTTCACCGCGCG	438	876	349	533	502	660
1634	sgRNA_1634	BCL2	GGCCTTCTTTGAGTTCGGTG	91	75	166	206	163	154
1635	sgRNA_1635	BCL2	TGGACATCTCGGCGAAGTCG	148	65	292	385	663	468
1636	sgRNA_1636	BCL2	TGTCGCAGAGGGGCTACGAG	257	170	231	293	264	285
1637	sgRNA_1637	BCL2A1	AACACTATTCAACCAAGTGA	469	215	139	392	408	377
1638	sgRNA_1638	BCL2A1	CTTATAGGTATCCACATCCG	600	252	825	428	910	716
1639	sgRNA_1639	BCL2A1	GAAGACGGCATCATTAACTG	823	260	472	332	421	420
1640	sgRNA_1640	BCL2A1	GTCCTACAGATACCACAACC	330	179	528	262	740	517
1641	sgRNA_1641	BCL2L1	CAGGCGACGAGTTTGAACTG	624	502	765	791	829	595
1642	sgRNA_1642	BCL2L1	CAGTGGCTCCATTCACCGCG	334	762	504	356	427	114
1643	sgRNA_1643	BCL2L1	CTCCGATTCAGTCCCTTCTG	296	246	81	345	265	302
1644	sgRNA_1644	BCL2L1	GACCCCAGTTTACCCCATCC	382	1215	249	386	277	271
1645	sgRNA_1645	BCL2L2	ACTTTGTAGGTTATAAGCTG	345	127	237	578	602	587
1646	sgRNA_1646	BCL2L2	AGACAAAGAAGGCTACAAGG	617	0	696	309	217	314
1647	sgRNA_1647	BCL2L2	AGCCCAACAACGCTTCACCC	585	477	1669	562	683	654
1648	sgRNA_1648	BCL2L2	GTGTGCTGAGAGTGTCAACA	577	597	1024	743	1154	944
1649	sgRNA_1649	BCL3	CAGGTTCACCAGAGGAAACG	683	1137	991	552	631	635
1650	sgRNA_1650	BCL3	CGGTGCCGACATCGACGCAG	715	662	975	610	544	656
1651	sgRNA_1651	BCL3	CTGGAGGCCCGCAATTATGA	940	1486	1178	712	1023	844
1652	sgRNA_1652	BCL3	GATCACCACATTACCGTCTG	1213	1263	1697	1086	1327	1419
1653	sgRNA_1653	BCL6	AAGTGATATGCACTACAGTG	879	3336	651	990	795	778
1654	sgRNA_1654	BCL6	CAAGACATCATGGCCTATCG	860	914	1185	977	1328	1420
1655	sgRNA_1655	BCL6	CATCTGCAGGTACATAGCCG	823	555	785	730	679	871
1656	sgRNA_1656	BCL6	TCCCTCACCTGCAGGCCATG	1217	1931	850	876	912	1110
1657	sgRNA_1657	BCL7A	ATACTCACGTCATCAACCTT	518	316	599	705	892	786
1658	sgRNA_1658	BCL7A	TCGTAGGGATGTGTCACCAA	295	394	115	181	341	224
1659	sgRNA_1659	BCL7A	TGATATCAAGAGGGTCATGG	350	1304	85	202	195	247
1660	sgRNA_1660	BCL7A	TGGCTCAGAGGTGACCACTC	628	694	357	495	382	426
1661	sgRNA_1661	BCL9	AGGTTTCGGATCATTCCGAA	280	520	505	443	477	668
1662	sgRNA_1662	BCL9	ATGCTGAAATTACGCCCAGG	834	545	1029	761	712	1218
1663	sgRNA_1663	BCL9	CGGGAGTCATATGGTCAAGG	504	67	461	336	455	622
1664	sgRNA_1664	BCL9	TCTCTGATCAAAGGAGTCGG	0	99	119	0	44	0
1665	sgRNA_1665	TNFRSF17	ATTCTTCCACCGTGTACTCG	930	1261	1890	702	1286	1042
1666	sgRNA_1666	TNFRSF17	GAAGAACATCGAAGTTGACA	839	376	1130	680	813	526
1667	sgRNA_1667	TNFRSF17	TAACGCTGACATGTTAGAGG	291	676	404	459	373	498
1668	sgRNA_1668	TNFRSF17	TAATTAGGATCAGGTCTCCT	786	1218	1181	619	1393	1114
1669	sgRNA_1669	HCN2	AGTACAGTTCACTCCACGAG	1114	489	1552	601	941	1062
1670	sgRNA_1670	HCN2	CACGTTGAACACGATCCACG	15	0	133	0	77	250
1671	sgRNA_1671	HCN2	GGTGACTACATCATCCGCGA	226	79	117	238	75	301
1672	sgRNA_1672	HCN2	TCTGCGCACGTGGTTCGTGG	454	82	215	219	264	368
1673	sgRNA_1673	OPN1SW	ACCACGTATAGGACTCGCTG	985	1136	868	570	908	901
1674	sgRNA_1674	OPN1SW	CCACAGGTCTGGTTACAGGA	1270	735	617	721	894	1171
1675	sgRNA_1675	OPN1SW	CTGAAGCGGAAGTTGCCGAA	542	395	941	643	911	250
1676	sgRNA_1676	OPN1SW	GACGAAGTATCCGTTACAGC	210	606	657	749	496	444
1677	sgRNA_1677	BCR	AACTCCGTAGTTGTCCACGA	147	105	144	254	91	103
1678	sgRNA_1678	BCR	ATGAGGAGATCACACCCCGA	68	130	305	248	143	122
1679	sgRNA_1679	BCR	GCAATCCTCAAAACTCCGGG	97	0	0	80	216	152
1680	sgRNA_1680	BCR	TCCCCACAGAGGGCGAACAA	241	205	47	316	234	112
1681	sgRNA_1681	BCS1L	AATTCATCGATAACCCCAAG	173	37	0	171	86	333
1682	sgRNA_1682	BCS1L	AGATGATAGACTTGCAGACG	194	267	450	99	257	366
1683	sgRNA_1683	BCS1L	CAGAATTCAGTGGTCGCCGG	224	154	0	190	160	142
1684	sgRNA_1684	BCS1L	GGTACGAAGTCTCGACACTG	159	71	104	222	244	178
1685	sgRNA_1685	BDH1	CCGTCGGACTTATGCCAGTG	297	358	568	275	389	328
1686	sgRNA_1686	BDH1	CGGCATCTCAACGTTCGGGG	255	467	859	294	244	480
1687	sgRNA_1687	BDH1	CTTTCTCCCCCTCATCCGAA	213	928	1	314	172	233
1688	sgRNA_1688	BDH1	GTACTGCATCACCAAGTTCG	765	558	431	718	698	710
1689	sgRNA_1689	BDKRB1	AAGAAGACGATCGCAGCCAG	205	323	704	226	282	787
1690	sgRNA_1690	BDKRB1	ATGGATCGCAGCAGGAATGT	547	192	902	1063	1037	1016
1691	sgRNA_1691	BDKRB1	CCTCTGCCGTGTCATCAACG	971	167	845	579	857	948
1692	sgRNA_1692	BDKRB1	GCCACGTTCAGTTGCCGCCG	572	287	350	256	389	348
1693	sgRNA_1693	BDKRB2	AGATAATGGCATTCACCACG	608	752	1209	936	1256	1174
1694	sgRNA_1694	BDKRB2	CCAGAGCAAATGCCCCCAAG	233	27	592	567	446	399
1695	sgRNA_1695	BDKRB2	TGAAAACCATGTCCATGGGC	661	553	872	447	676	746
1696	sgRNA_1696	BDKRB2	TGGGTAGCTGATGACACAAG	558	253	687	380	631	805
1697	sgRNA_1697	CFB	CATGTACGACACCCCTCAAG	194	127	288	286	254	83
1698	sgRNA_1698	CFB	TATGACGGTTACACTCTCCG	379	272	41	103	256	295
1699	sgRNA_1699	CFB	TCTGCAGGATTGCACAACAT	678	31	736	262	566	419
1700	sgRNA_1700	CFB	TGTCTGATCCATCTAGCACC	735	622	720	540	709	268
1701	sgRNA_1701	BFSP1	CAGCATCCATTGTGACGAGT	147	105	446	162	343	171
1702	sgRNA_1702	BFSP1	CCCTCCCCAAGAATGTTCCA	716	342	671	662	849	905
1703	sgRNA_1703	BFSP1	TCTCGATGATACGATGATAC	0	0	0	0	0	0
1704	sgRNA_1704	BFSP1	TCTGCAAGATGATATCAGTG	520	333	80	306	176	484
1705	sgRNA_1705	BGLAP	CATTGATACAGGTAGCGCCT	277	427	634	184	307	284
1706	sgRNA_1706	BGLAP	CGGCCAGGGCCAATAGGGCG	304	705	232	590	554	319
1707	sgRNA_1707	BGLAP	CTGGCCAGCGATGCAAAGTG	441	557	645	592	992	742
1708	sgRNA_1708	BGLAP	GCTACCTGTATCAATGGCTG	341	317	318	402	643	765
1709	sgRNA_1709	BGN	AAGCTGACTGGCATCCCCAA	560	330	0	477	423	343
1710	sgRNA_1710	BGN	AGCACTGAACCACCCGCAGG	530	366	551	381	549	559
1711	sgRNA_1711	BGN	CGACATCTCCGAGCTCCGCA	112	394	138	142	418	184
1712	sgRNA_1712	BGN	GCCATTCATGATGAACGATG	587	217	221	77	214	75
1713	sgRNA_1713	CEACAM1	ACCCCAGGGCCCGCAAACAG	843	782	996	690	779	568
1714	sgRNA_1714	CEACAM1	CAGTGACTGAGTTATTGGCG	536	642	369	602	465	529
1715	sgRNA_1715	CEACAM1	GAATGTTCCATTGATAAGCC	328	208	751	182	204	281
1716	sgRNA_1716	CEACAM1	TGCCATTCAATGTTGCAGAG	418	446	167	201	417	478
1717	sgRNA_1717	BHMT	AAGAGGGGCTACGTAAAGGC	333	109	84	200	128	475
1718	sgRNA_1718	BHMT	GATAGCATCCGGTAAACCTG	318	1826	199	185	730	275
1719	sgRNA_1719	BHMT	TCAGGAGTGTGGTAAGCCAA	505	937	530	658	669	680
1720	sgRNA_1720	BHMT	TGACGTTTGAGCCAGCTCTG	201	922	789	481	912	776
1721	sgRNA_1721	BICD1	ACCCCGCCTGGCTAATCGTG	1084	1069	1176	678	1101	1016
1722	sgRNA_1722	BICD1	AGATGGACTCAAATTTGCCG	433	393	831	402	784	616
1723	sgRNA_1723	BICD1	ATACAGGGTGGCAGTAACTG	163	515	760	198	518	194
1724	sgRNA_1724	BICD1	ATGTACAGGCAGAAAACGAG	200	543	221	553	823	350
1725	sgRNA_1725	BID	ACATCATCCGGAATATTGCC	309	720	965	486	589	444
1726	sgRNA_1726	BID	CAACAACGGTTCCAGCCTCA	1066	665	875	831	1292	1203
1727	sgRNA_1727	BID	CAGGAACACCAGCCGGTCGG	342	249	705	371	974	318
1728	sgRNA_1728	BID	TGGGAAGAATAGAGGCAGGT	369	338	377	539	583	462
1729	sgRNA_1729	BIK	AAGAATCGAAGTCCTCCATA	240	235	516	319	502	337
1730	sgRNA_1730	BIK	CCAAGAACCTCCATGGTCGG	611	394	593	263	755	161
1731	sgRNA_1731	BIK	GCAGTGACGCATTGGCCCTG	365	682	363	259	415	220
1732	sgRNA_1732	BIK	TTTCATCTACGACCAGACTG	869	863	646	454	542	619
1733	sgRNA_1733	PRDM1	AGGATGCGGATATGACTCTG	398	80	127	401	393	432
1734	sgRNA_1734	PRDM1	GGACGCGTTCAAGTAAGCGT	434	947	265	96	294	95
1735	sgRNA_1735	PRDM1	GGGGAGCGAGTGATGTACGT	415	0	159	159	379	198
1736	sgRNA_1736	PRDM1	TTTGGACAGATCTATTCCAG	91	749	183	286	280	227
1737	sgRNA_1737	BLK	ACTCGGGCCACAAAGTTACT	1128	1418	828	687	1239	1207
1738	sgRNA_1738	BLK	CAGGTCCCGATCATTCATAG	195	345	187	275	202	451
1739	sgRNA_1739	BLK	GCTGGTCCGACTCTACGCAG	97	101	160	345	289	415
1740	sgRNA_1740	BLK	GCTTCTTGCTCCAATCAACA	147	0	43	126	102	164
1741	sgRNA_1741	BLM	CCAACACCACAAATCAGCAA	62	206	340	118	147	188
1742	sgRNA_1742	BLM	CGTGCAACAACTTACACCTG	180	392	245	324	310	312
1743	sgRNA_1743	BLM	GCCTATCAACCCATCAAGGA	0	123	0	145	23	127
1744	sgRNA_1744	BLM	TCTACGATAAGTGATCTCAA	411	262	29	276	494	428
1745	sgRNA_1745	BLMH	ACTTAAGCAATATGGTTGGA	544	245	903	624	821	897
1746	sgRNA_1746	BLMH	GAGAATTCTGTATACGACTG	520	221	901	182	162	269
1747	sgRNA_1747	BLMH	TATTAACAAGCATATCCCAT	535	130	480	204	373	227
1748	sgRNA_1748	BLMH	TCCACCAGAGACATTCACCT	485	148	482	508	520	684
1749	sgRNA_1749	CXCR5	ATCTCTGCCCTGCCACAGAG	352	601	228	234	260	499
1750	sgRNA_1750	CXCR5	CTCCCGATTCCTCTACCATG	436	113	248	164	224	204
1751	sgRNA_1751	CXCR5	GTGGAACAGGAAGGTCTCCG	354	448	396	297	427	223
1752	sgRNA_1752	CXCR5	TCTTGGGAGAAGGTGCAACG	303	151	139	319	354	527
1753	sgRNA_1753	BLVRA	AGAGGAGCGACCCTTTCAGC	399	151	89	201	192	329
1754	sgRNA_1754	BLVRA	GCATGTTGAACTCTTGATGG	415	126	362	271	390	402
1755	sgRNA_1755	BLVRA	GTGTCATGGGGTATTCCACA	322	573	44	494	657	670
1756	sgRNA_1756	BLVRA	TGATTGGCTTCGTGTCGAGG	552	706	346	251	507	257
1757	sgRNA_1757	BLVRB	AACATCTCCCACTACCACGT	82	0	104	56	144	138
1758	sgRNA_1758	BLVRB	ATGATCCCACCACCCACCCG	819	367	118	202	501	557
1759	sgRNA_1759	BLVRB	ATGTGGACAAGACCGTGGCT	276	197	240	352	335	79
1760	sgRNA_1760	BLVRB	CGAGGGCGCCCGGAACATTG	427	267	1	182	275	240
1761	sgRNA_1761	BNC1	AATGACCCTATCAGTGCAGG	100	419	224	513	294	424
1762	sgRNA_1762	BNC1	ACTCAATTACTGATTCACGA	184	372	156	264	167	255
1763	sgRNA_1763	BNC1	GTACCTGCAGTACGTATCCA	198	304	469	434	675	405
1764	sgRNA_1764	BNC1	TGCATTGGTCACACTGACGG	662	449	596	545	443	925
1765	sgRNA_1765	BMI1	AATGGCTCTAATGAAGATAG	441	453	140	227	422	580
1766	sgRNA_1766	BMI1	CTCCACAAAGCACACACATC	147	84	181	212	186	32
1767	sgRNA_1767	BMI1	GATTGATGTCATGTATGAGG	67	22	194	272	197	197
1768	sgRNA_1768	BMI1	TTCTCTTTATTAGATTGGAT	202	175	205	302	166	212
1769	sgRNA_1769	BMP1	AGCAGGCTGTGGATCTCAGA	350	422	365	326	295	388
1770	sgRNA_1770	BMP1	CTGTGCCTACGACTATCTGG	181	0	1	253	278	420
1771	sgRNA_1771	BMP1	GTAGCCATTGGGGTATTCAG	161	128	416	319	409	337
1772	sgRNA_1772	BMP1	TCTCACGAACGATGGAAACG	0	0	0	32	93	0
1773	sgRNA_1773	BMP2	AGTCCACCGCATCACAGCGG	219	289	512	311	621	385
1774	sgRNA_1774	BMP2	GGGCCGCAGGAAGTTCGCGG	852	1332	1449	564	941	611
1775	sgRNA_1775	BMP2	TACAGGTCTAGCATGTAGGG	307	561	136	440	453	234
1776	sgRNA_1776	BMP2	TGAGGTGATAAACTCCTCCG	540	1014	319	395	754	581
1777	sgRNA_1777	BMP3	AGTGTGGTATCAAGCTTACA	1556	1117	1282	973	1748	1190
1778	sgRNA_1778	BMP3	CTCCAGACACTGGACAACTC	920	208	831	583	732	483
1779	sgRNA_1779	BMP3	GAGGAAGAAGCGCTCTACTG	1262	786	2014	757	1264	1242
1780	sgRNA_1780	BMP3	TATCACTCAACTCTTGAGGA	370	400	990	617	600	675
1781	sgRNA_1781	BMP4	ATTAGCCGATCGTTACCTCA	336	74	306	355	424	425
1782	sgRNA_1782	BMP4	CCTCATAAATGTTTATACGG	131	135	194	219	67	219
1783	sgRNA_1783	BMP4	GGGAGAAGCAGCCAAACTAT	742	690	728	572	667	670
1784	sgRNA_1784	BMP4	TGGTCCACCACAATGTGACA	725	893	618	498	502	581
1785	sgRNA_1785	BMP5	AAAGGCCCAAGCTTTAGATG	1490	1014	986	662	1121	1504
1786	sgRNA_1786	BMP5	AGCTGAATTCCGGATATACA	907	1008	221	580	443	924
1787	sgRNA_1787	BMP5	CGAGATAACTGTATGCGACG	751	2584	828	1108	1019	857
1788	sgRNA_1788	BMP5	CTAGTGGGTTATGCAAAAGG	861	514	789	569	891	893
1789	sgRNA_1789	BMP6	GGCGCGGACTTCAGTCGCCC	122	295	497	183	379	81
1790	sgRNA_1790	BMP6	GTGACTCCACAGCATAACAT	154	182	49	119	222	274
1791	sgRNA_1791	BMP6	TCTACAAGGACTGTGTTATG	490	456	825	383	476	426
1792	sgRNA_1792	BMP6	TCTTATAGTGGAGTACGACA	315	356	0	270	249	325
1793	sgRNA_1793	BMP7	ACCACTGGGTGGTCAATCCG	487	158	237	303	298	381
1794	sgRNA_1794	BMP7	CAAACCGGAACTCTCGATGG	666	388	415	800	875	1155
1795	sgRNA_1795	BMP7	TACAGGTCCAGCATGAACAT	1230	435	1220	927	1040	574
1796	sgRNA_1796	BMP7	TGACCATGTCGGCGTCGGTG	443	97	707	353	182	400
1797	sgRNA_1797	BMP8B	CATGGCCGGCGACGACGACG	345	815	217	398	459	516
1798	sgRNA_1798	BMP8B	CGGTGCTCGGGCTGCCTGGG	530	335	259	720	936	769
1799	sgRNA_1799	BMP8B	CTGAAGCGTCACAAGGACCT	1441	440	1509	774	464	701
1800	sgRNA_1800	BMP8B	GTCATGAGCTTCGTTAACAT	428	188	376	444	239	451
1801	sgRNA_1801	BMPR1A	ATAGCACTTTAAAAAAGGCA	274	316	0	150	314	259
1802	sgRNA_1802	BMPR1A	ATGGCGTGGCGAAAAAGTGG	1263	362	564	317	309	730
1803	sgRNA_1803	BMPR1A	CAACTGGACAGGTTTCATAG	509	311	1028	439	554	342
1804	sgRNA_1804	BMPR1A	TAACCTACCTATGACAACAG	87	40	269	134	58	170
1805	sgRNA_1805	BMPR1B	CATTGATTTAGCGTCTAGGG	500	436	981	569	450	686
1806	sgRNA_1806	BMPR1B	GATTGGAAAAGGTCGCTATG	673	886	478	743	748	1123
1807	sgRNA_1807	BMPR1B	TCTAACCCAATGCTGTATCG	394	667	1360	412	252	403
1808	sgRNA_1808	BMPR1B	TGATGGACCTATACACCACA	635	346	287	474	530	361
1809	sgRNA_1809	BMPR2	AGCAACTGGACGCTCATCCA	1303	807	1751	1711	1659	2132
1810	sgRNA_1810	BMPR2	CAGCACACCTTTGACTATAG	428	93	487	536	662	751
1811	sgRNA_1811	BMPR2	CCTTTGGGAGAAATCAAAAG	55	884	446	235	159	169
1812	sgRNA_1812	BMPR2	GTGACTTTGGACTGTCCATG	491	835	861	605	644	914
1813	sgRNA_1813	BMX	GGGAAGACTTCCCTGACTGG	1681	2327	1671	1142	1026	1405
1814	sgRNA_1814	BMX	GGGGTTACCCCTTATCTCTG	337	154	72	277	275	284
1815	sgRNA_1815	BMX	GGTTAGAAATTCGAGCCAAG	737	331	93	403	480	469
1816	sgRNA_1816	BMX	TGTTGGCCTTTGTTGACACA	1112	1020	1019	831	1327	1612
1817	sgRNA_1817	POLR3D	AGGGAACTGGGATAAGACAG	117	79	28	130	122	214
1818	sgRNA_1818	POLR3D	AGGTCCCTGGAACGGATGGA	312	149	84	136	321	85
1819	sgRNA_1819	POLR3D	CCACAGATACATCCTTCGGG	20	0	14	389	129	243
1820	sgRNA_1820	POLR3D	TCACCCCAAATATCATCAGT	105	58	18	0	191	66
1821	sgRNA_1821	BNIP1	AGAGATTGTCAAATTTGACC	286	423	109	89	86	177
1822	sgRNA_1822	BNIP1	CCAGCAATCAGGCCTCATGG	258	183	331	449	410	420
1823	sgRNA_1823	BNIP1	CCATCACTGAGAGCCTCATG	524	357	1146	401	258	427
1824	sgRNA_1824	BNIP1	GTTGCGTCACAGAATACAGG	31	99	381	168	107	284
1825	sgRNA_1825	BNIP2	AACTCATTACTATTCTCTGA	86	58	0	160	153	233
1826	sgRNA_1826	BNIP2	CGGGATGTTATCACTTCCGC	121	230	537	483	474	248
1827	sgRNA_1827	BNIP2	GGTCTCCACCGCCGACCGAG	153	6	528	334	194	117
1828	sgRNA_1828	BNIP2	TCCAGACATTAGCCTGACAC	386	717	102	233	161	140
1829	sgRNA_1829	BNIP3	AAGCGGAGGTCGGAGCGCCG	41	150	215	66	207	173
1830	sgRNA_1830	BNIP3	TCTTGTGGTGTCTGCGAGCG	327	92	413	276	366	638
1831	sgRNA_1831	BNIP3	TTCAGCAATAATGGGAACGG	643	257	483	367	586	491
1832	sgRNA_1832	BNIP3	TTCTGCGACATGGCGCCAGA	765	493	379	794	511	585
1833	sgRNA_1833	BNIP3L	CCCGACACACCTGAGAGCTA	287	549	102	232	558	542
1834	sgRNA_1834	BNIP3L	GTTCATGGGTAGCTCCACCC	761	235	990	889	775	839
1835	sgRNA_1835	BNIP3L	TCAGGACAGAGTAGTTCCAG	321	1005	1079	289	397	234
1836	sgRNA_1836	BNIP3L	TCCTCATCCTCCATCCACAA	556	44	209	78	157	190
1837	sgRNA_1837	BOK	AGGAACGCATCGGTCACCAC	522	265	308	598	884	917
1838	sgRNA_1838	BOK	GCCCAGCGTCTACCGCAACG	1109	794	1613	1289	874	1264
1839	sgRNA_1839	BOK	GCCGGGAGTACGTGCACGCG	1200	609	733	833	857	851
1840	sgRNA_1840	BOK	GGTGGTGTCCCTGTATGCGG	700	29	22	395	519	318
1841	sgRNA_1841	DST	ATTACAAACAATGACCTACC	67	142	0	123	196	122
1842	sgRNA_1842	DST	CAAAGAAGCTAAAATCAGTG	192	48	99	210	299	227
1843	sgRNA_1843	DST	GCCAGTGTGTCCGATCACAC	61	0	18	150	173	97
1844	sgRNA_1844	DST	TAGAATTCGAGCTAGCAATG	560	169	157	206	430	434
1845	sgRNA_1845	FOXL2	AGAGACCGGTCGCACAGTCA	999	1168	1520	1566	1220	1693
1846	sgRNA_1846	FOXL2	CCTTGATGAAGCACTCGTTG	205	150	135	172	241	541
1847	sgRNA_1847	FOXL2	GAAGCCCCCGTACTCGTACG	850	1155	1340	967	1040	1238
1848	sgRNA_1848	FOXL2	GTAGCGGCCACGAGTTGTTG	1402	552	940	1137	1707	1456
1849	sgRNA_1849	BPGM	AAGAAATCTACAACGACCGG	633	404	484	664	682	503
1850	sgRNA_1850	BPGM	ACTCAACAGCGAAGGAATGG	500	84	0	229	155	380
1851	sgRNA_1851	BPGM	CTTGGATCAACTGCCACGGT	174	732	133	607	381	269
1852	sgRNA_1852	BPGM	GGCCTTGATCGGTCTCAACA	149	363	155	154	220	165
1853	sgRNA_1853	BPHL	AGATGCTGTTGATTTGATGA	735	776	483	787	895	1040
1854	sgRNA_1854	BPHL	GAAGACAGCATGATATATGA	302	432	649	244	174	201
1855	sgRNA_1855	BPHL	GTGGTCGCCTGGGATCCTCG	173	948	223	151	112	310
1856	sgRNA_1856	BPHL	TGGCCGCCATTACCCGAACG	507	550	853	414	394	557
1857	sgRNA_1857	BPI	AGAGGCCCAGGTATACCATG	314	158	234	613	332	524
1858	sgRNA_1858	BPI	CTGGAAATAAGGTTGCAGCT	85	119	522	70	304	122
1859	sgRNA_1859	BPI	GATGACCCTTAGAGATGACA	284	129	251	143	130	332
1860	sgRNA_1860	BPI	TCACTGTAAAACTCCCCCTG	192	46	230	268	270	565
1861	sgRNA_1861	BRCA1	AAGGAGCCAACATAACAGAT	230	110	0	183	40	87
1862	sgRNA_1862	BRCA1	AGAAACCTACAACTCATGGA	20	0	0	166	35	235
1863	sgRNA_1863	BRCA1	GGCTCAGGGTTACCGAAGAG	495	306	369	363	252	704
1864	sgRNA_1864	BRCA1	TGGTACTGATTATGGCACTC	374	494	72	250	427	540
1865	sgRNA_1865	BRAF	ACAAATGATTAAGTTGACAC	89	27	434	89	272	217
1866	sgRNA_1866	BRAF	ATACCCAATAGAGTCCGAGG	86	0	0	364	65	35
1867	sgRNA_1867	BRAF	GGGGGTAGCAGACAAACCTG	405	548	573	347	642	453
1868	sgRNA_1868	BRAF	TCATAATTAACACACATCAG	13	181	144	130	147	269
1869	sgRNA_1869	BRCA2	AAAATGTCAGACAAGCTCAA	326	188	268	157	185	267
1870	sgRNA_1870	BRCA2	AATTATGGCAGGTTGTTACG	534	412	328	445	736	502
1871	sgRNA_1871	BRCA2	AGCACAGTAGAACTAAGGGT	472	413	926	348	222	526
1872	sgRNA_1872	BRCA2	GTCTACCTGACCAATCGATG	316	113	462	177	314	642
1873	sgRNA_1873	BRDT	AACTCCCTGGAGATAAACTT	62	209	372	103	282	100
1874	sgRNA_1874	BRDT	ATGGCCCTTTCAACGTCCTG	337	136	433	581	382	598
1875	sgRNA_1875	BRDT	CAACTCCAGTTCACAAACTG	485	50	518	374	425	491
1876	sgRNA_1876	BRDT	TGACGTTGTCAAAAATCCGA	60	33	120	30	82	124
1877	sgRNA_1877	ZFP36L1	AAACGGTGCCTGTAAGTACG	869	567	1204	475	1203	662
1878	sgRNA_1878	ZFP36L1	AGGGGCAAAAGCCGATGGTG	179	620	643	280	172	547
1879	sgRNA_1879	ZFP36L1	GCTGTCTCGCGAGCTCAGAG	546	458	249	405	385	504
1880	sgRNA_1880	ZFP36L1	GGGTGACTGAGTGCCTCCGA	307	296	222	267	143	336
1881	sgRNA_1881	ZFP36L2	CGCCGTTCTCGCTAAACGAG	143	445	409	492	276	418
1882	sgRNA_1882	ZFP36L2	GCTCGGTCTTGTACTTCGGA	350	459	216	631	369	543
1883	sgRNA_1883	ZFP36L2	TCATCCACAACGCGGACGAG	593	661	489	623	913	1186
1884	sgRNA_1884	ZFP36L2	TGCCGGCCCTTCGAGGAGAG	447	649	966	625	966	1030
1885	sgRNA_1885	BRS3	CACAAATAAAGGATGGAGCG	536	982	58	296	510	350
1886	sgRNA_1886	BRS3	CACCCTGAACATACCTACTG	146	73	445	307	461	393
1887	sgRNA_1887	BRS3	GCAACTCACTACCTTGCAGA	14	181	36	258	220	206
1888	sgRNA_1888	BRS3	TTGGAGGGCTGTCGCTCAAG	172	232	526	315	475	509
1889	sgRNA_1889	BSG	CATCTCCATCGACACGCTCG	683	631	369	1102	927	800
1890	sgRNA_1890	BSG	GGATCGCAACCACCTGACCC	737	1261	786	579	439	481
1891	sgRNA_1891	BSG	GTCGTCAGAACACATCAACG	516	802	146	288	387	221
1892	sgRNA_1892	BSG	GTGGACTCCGACGACCAGTG	695	597	719	526	513	394
1893	sgRNA_1893	BST1	ATAAAAAGGTCATAGTCTGA	152	865	765	240	182	194
1894	sgRNA_1894	BST1	CGCTCAGGGGCATAAAACGA	438	55	176	416	368	391
1895	sgRNA_1895	BST1	CTGAACCATTCAGCATGACG	880	676	277	738	451	811
1896	sgRNA_1896	BST1	TGTCGACAGAAAAATGACTC	366	211	0	372	138	191
1897	sgRNA_1897	BST2	CTCTTCTTAGATGGCCCTAA	288	186	629	395	458	156
1898	sgRNA_1898	BST2	CTGGATGCAGAGAAGGCCCA	278	243	0	695	508	226
1899	sgRNA_1899	BST2	GGCCCAAGGACAAAAGAAAG	148	492	423	170	117	266
1900	sgRNA_1900	BST2	GGCTTCCCTGGATGCAGAGA	326	186	359	115	105	136
1901	sgRNA_1901	BTC	ACCACACAATCAAAGCGGAA	184	0	137	91	137	206
1902	sgRNA_1902	BTC	AGGACACTCCACTTACACAC	74	68	295	162	60	65
1903	sgRNA_1903	BTC	AGTAATGCTTGTATTGCTTG	725	559	793	386	603	630
1904	sgRNA_1904	BTC	TCTAGTGATCCTTCACTGTG	395	234	365	346	221	417
1905	sgRNA_1905	BTD	ATGTTGTGTACCCAACTGCC	700	492	249	293	573	569
1906	sgRNA_1906	BTD	CTGAGTTGTATGGCCATCAG	138	619	470	318	317	261
1907	sgRNA_1907	BTD	GTACCAAAAGGACTCCAGAG	309	85	302	283	109	381
1908	sgRNA_1908	BTD	TTTACGGTAGCGGTCAACAA	223	104	0	164	208	84
1909	sgRNA_1909	KLF9	AGGACTCGACCCAGATTCGG	565	645	414	245	522	852
1910	sgRNA_1910	KLF9	CCAAGGAGCACGGTGACCCG	715	1703	260	377	474	175
1911	sgRNA_1911	KLF9	CTTTCCCACAGCCACTGTAG	738	791	389	448	491	513
1912	sgRNA_1912	KLF9	GGGTCGCTCCGGACGCCGAG	500	445	462	466	605	560
1913	sgRNA_1913	KLF5	ACTGCAGTGAAACAATTCCA	377	433	203	137	192	0
1914	sgRNA_1914	KLF5	GAAGAACTGGTCTACGACTG	639	369	1064	335	582	673
1915	sgRNA_1915	KLF5	GCTGTCTGATTTGTAGAACT	734	756	26	479	400	265
1916	sgRNA_1916	KLF5	GTCTTGATGTGTGTTACGCA	888	464	434	807	764	1138
1917	sgRNA_1917	BTF3	AACTGCTCGCAGAAAGAAGA	27	265	0	225	81	169
1918	sgRNA_1918	BTF3	CTGCAGGCACAAGTGCGCAT	1032	957	433	748	741	1037
1919	sgRNA_1919	BTF3	TCAGCTGCTTTGTCTCAGCA	518	886	603	439	494	695
1920	sgRNA_1920	BTF3	TTAGGGGTAAACAATATCTC	136	376	181	824	532	752
1921	sgRNA_1921	BTG1	AATGGATCCTCTGATTGGAC	421	595	405	325	501	367
1922	sgRNA_1922	BTG1	CTCCAAGTTTCTCCGCACCA	419	728	350	745	655	854
1923	sgRNA_1923	BTG1	GATCTCGCCTATCATGGTGG	448	65	495	469	759	354
1924	sgRNA_1924	BTG1	TTCTGTAGGACACTTCATAG	681	526	211	364	647	509
1925	sgRNA_1925	BTK	ATAAGGAGTTACCGTATCCC	293	609	633	300	527	477
1926	sgRNA_1926	BTK	CTGTGTTTGCTAAATCCACA	215	208	29	156	85	234
1927	sgRNA_1927	BTK	GATGGTAGTTAATGAGCTCA	208	127	377	195	487	351
1928	sgRNA_1928	BTK	TATGAGTATGACTTTGAACG	138	744	114	382	414	482
1929	sgRNA_1929	BTN1A1	ACAGCCACAGCCACTATCCA	1119	442	766	618	722	850
1930	sgRNA_1930	BTN1A1	CCCGTCCCTATGCACCAGCA	604	626	589	665	183	571
1931	sgRNA_1931	BTN1A1	TCCAGGACGGCATCGCCAAG	348	680	722	499	934	678
1932	sgRNA_1932	BTN1A1	TGAACTTGCATACTGATGTG	542	704	230	258	214	325
1933	sgRNA_1933	BUB1	CAAGGAGAAGCTTATTCGTG	64	0	0	28	49	30
1934	sgRNA_1934	BUB1	GGTAGCAAAACAGTGTACCC	81	442	75	336	397	164
1935	sgRNA_1935	BUB1	TCAGAGAGGAATTCAAAACC	132	55	0	115	169	285
1936	sgRNA_1936	BUB1	TGATGAATCTTGGGTCATTG	299	2299	1032	385	244	361
1937	sgRNA_1937	BUB1B	AAAATGGAGAAAGGTACACT	50	48	0	99	134	119
1938	sgRNA_1938	BUB1B	AGGAATTGAACCCTTGAGCG	81	24	0	63	97	113
1939	sgRNA_1939	BUB1B	AGTGAAGCTGTATTGCCACG	596	120	836	336	295	558
1940	sgRNA_1940	BUB1B	GCAGATGCGATATTTCAGGA	553	725	326	584	385	590
1941	sgRNA_1941	BYSL	GCAACGTCATCTCGTACTCG	276	398	194	455	386	273
1942	sgRNA_1942	BYSL	GGTTGAGACAGTCATGTCAG	355	258	233	167	563	286
1943	sgRNA_1943	BYSL	GTATTATCTAAGTACCGCAG	80	130	0	74	143	126
1944	sgRNA_1944	BYSL	TCAGGATGGATCAGATGACG	26	0	83	153	198	139
1945	sgRNA_1945	TSPO	GCACGCTCTACTCAGCCATG	303	639	604	294	236	181
1946	sgRNA_1946	TSPO	GGGGGGCCATGCCCAGTTCA	777	769	213	556	722	582
1947	sgRNA_1947	TSPO	TCTGCAGGCCGGCGTACCAG	158	557	122	334	424	819
1948	sgRNA_1948	TSPO	TGGTGCCCGACAAATGGGCT	1057	559	1023	402	972	919
1949	sgRNA_1949	C1QBP	ATAATGACAGTCCAACACAA	0	83	0	26	187	389
1950	sgRNA_1950	C1QBP	ATTAGTGCGGAAAGTTGCCG	164	130	515	698	535	1113
1951	sgRNA_1951	C1QBP	GCGTGCGCGCAGGTTCCGAG	826	578	390	549	722	561
1952	sgRNA_1952	C1QBP	GGCCCGCTAAACCTCACCGT	48	0	379	45	134	149
1953	sgRNA_1953	SERPING1	CTTGGAGAGTCATTCAACAG	319	175	205	237	279	396
1954	sgRNA_1954	SERPING1	GAGCATCCTCTCTTACCCCA	212	799	743	318	552	482
1955	sgRNA_1955	SERPING1	GTTTGCAAGACAGAGGCGAA	626	1332	735	621	384	562
1956	sgRNA_1956	SERPING1	TAAGGGCACCCTTACCACTC	704	753	822	1001	1014	934
1957	sgRNA_1957	C1QA	AAGGCCTTAAAGGAGACCAG	707	1270	570	766	845	876
1958	sgRNA_1958	C1QA	CCGGCAAGGTGGGCTACCCA	594	783	270	1056	765	1310
1959	sgRNA_1959	C1QA	GAAACATCAAGGACCAGCCG	859	613	493	433	433	436
1960	sgRNA_1960	C1QA	GAACCGTACCAGAACCACTC	117	0	329	144	192	326
1961	sgRNA_1961	C1QB	AACAATTATGAGCCCCGCAG	474	468	578	376	168	211
1962	sgRNA_1962	C1QB	AGTCTCCCGATTCACCTTTG	754	992	323	602	625	725
1963	sgRNA_1963	C1QB	CCTGGGAATCCAGGAAAAGT	252	307	380	91	265	288
1964	sgRNA_1964	C1QB	GGGCCTAATCGATATCTCCC	141	209	238	358	218	314
1965	sgRNA_1965	C1QC	ATGGGTACGACGGACTGCCG	692	1064	663	611	1238	1100
1966	sgRNA_1966	C1QC	CAGGCTGCTACGGGATCCCA	627	670	553	440	344	687
1967	sgRNA_1967	C1QC	CCAGCCATTCCCGGGATCCG	984	1658	1319	590	626	974
1968	sgRNA_1968	C1QC	GCGGTCCTCACCAACCCGCA	492	767	417	545	460	792
1969	sgRNA_1969	C1S	CACGCACAACTAAACTGTCA	256	115	170	80	50	175
1970	sgRNA_1970	C1S	CTGTGCGTATGACTCAGTGC	274	286	518	243	399	308
1971	sgRNA_1971	C1S	GATGACATGAAGAATTGCGG	152	392	183	360	402	461
1972	sgRNA_1972	C1S	TCTTCCAAACTGATCTAACA	63	0	141	73	110	68
1973	sgRNA_1973	C2	ACAGCTGTGTGTGATAATGG	1015	1285	780	837	1175	1012
1974	sgRNA_1974	C2	ACCAGACATCTATGCCATCG	847	754	741	830	646	1301
1975	sgRNA_1975	C2	ACCTTAATAGTGACATGCCA	884	318	1012	636	411	573
1976	sgRNA_1976	C2	TGCTCACGGGGTCTTCGGAG	1792	877	602	735	1247	1163
1977	sgRNA_1977	C3	ACTGTGCAGTCTCTAACCCA	1297	1650	969	1080	1215	1317
1978	sgRNA_1978	C3	GACATATGGAACGGACAACG	481	132	221	285	209	261
1979	sgRNA_1979	C3	GCTGGCACGAGAACCTCATG	840	627	448	1024	652	990
1980	sgRNA_1980	C3	GTAATGCACAGCGATGACCG	901	3187	699	1200	1198	1353
1981	sgRNA_1981	C3AR1	AAAGCATCAGAGTTATCCAG	336	379	471	243	129	578
1982	sgRNA_1982	C3AR1	ACAGACAACCATAATAGATG	324	108	254	338	308	294
1983	sgRNA_1983	C3AR1	TACGAGTCTGAGCTACCACA	538	218	499	293	230	218
1984	sgRNA_1984	C3AR1	TGGAGGGGATGAGCTTGCAT	447	517	180	500	651	201
1985	sgRNA_1985	C4A	CAGGCCATGGATCTCCCACG	270	253	119	224	136	246
1986	sgRNA_1986	C4A	GCTCAATAGACAGAAACCCG	186	35	152	59	85	76
1987	sgRNA_1987	C4A	TCCCACAAGCCCCTCAACAT	97	84	179	117	92	297
1988	sgRNA_1988	C4A	TCCTGTCTAACACTGGACAG	422	567	98	484	427	405
1989	sgRNA_1989	C4B	AGAGTGTCCCCAACACGAGG	162	135	100	167	93	101
1990	sgRNA_1990	C4B	AGCTACGTCAGGGTTACAGG	259	274	528	417	282	372
1991	sgRNA_1991	C4B	TCCTATGTATCACTGGAGAG	147	66	0	370	50	168
1992	sgRNA_1992	C4B	TGCCAAGCAGTACCGGAACG	414	312	318	329	356	408
1993	sgRNA_1993	C4BPA	AGGCTTACACTTGACAACTG	696	849	694	600	624	1248
1994	sgRNA_1994	C4BPA	AGTCAACGTAATATCCATCG	841	170	330	441	543	679
1995	sgRNA_1995	C4BPA	ATGGTGAAATCACTCAACAC	376	148	566	208	449	460
1996	sgRNA_1996	C4BPA	GTTTGTAGCCAGGATGACAG	842	1002	1038	948	963	1334
1997	sgRNA_1997	C4BPB	AATATGCTATTGTCCACTGG	655	407	257	434	671	867
1998	sgRNA_1998	C4BPB	AGGTGTGGTCCTCTAGACAC	528	585	812	561	476	1134
[truncated: 75,443 more rows]
