# Supplementary material for: Systematic identification and characterization of exon–intron circRNAs
Source: Genome Res. 2024 Mar;34(3):376–93. doi: 10.1101/gr.278590.123 (PMC11067877; doi:10.1101/gr.278590.123)
Supplement: Supplement 6 [file Supplemental_Table_S6.xlsx]

## Sheet: Table S6. EIciRNA_SRSF1_KD
Supplemental Table S6: Expression levels of EIciRNAs after SRSF1 knockdown HEK293 cells
chr	circ_start	circ_end	intron_start	intron_end	strand	#BSJ_Normalized	sample
Chr1	935771	939460	939129	939271	+	4.03932	shCtrl_rep1
Chr1	1256991	1257310	1257130	1257207	-	7.06882	shCtrl_rep1
Chr1	2055440	2059591	2055562	2056483	+	5.04916	shCtrl_rep1
Chr1	25809094	25814178	25813993	25814076	+	4.03932	shCtrl_rep1
Chr1	32224033	32224475	32224121	32224409	+	24.2359	shCtrl_rep1
Chr1	32326938	32327677	32327077	32327535	+	5.04916	shCtrl_rep1
Chr1	94487541	94491247	94487611	94487693	+	1.00983	shCtrl_rep1
Chr1	155725381	155726019	155725490	155725926	+	6.05899	shCtrl_rep1
Chr1	179063926	179064496	179064098	179064304	+	4.03932	shCtrl_rep1
Chr1	227732880	227733681	227733027	227733413	-	9.08848	shCtrl_rep1
Chr10	70209204	70209685	70209290	70209557	-	8.07865	shCtrl_rep1
Chr10	73504849	73505426	73504990	73505322	-	5.04916	shCtrl_rep1
Chr10	73575511	73576361	73575675	73576135	-	8.07865	shCtrl_rep1
Chr10	75219062	75219356	75219215	75219303	+	1.00983	shCtrl_rep1
Chr10	95682650	95685636	95683195	95683521	-	4.03932	shCtrl_rep1
Chr10	97437190	97437750	97437275	97437699	-	92.9045	shCtrl_rep1
Chr10	97437190	97438703	97437275	97437699	-	2.01966	shCtrl_rep1
Chr10	97459361	97459741	97459526	97459658	-	6.05899	shCtrl_rep1
Chr10	97476682	97484151	97476744	97476834	-	3.02949	shCtrl_rep1
Chr10	102157018	102158214	102157074	102157185	+	1.00983	shCtrl_rep1
Chr10	103438014	103438808	103438071	103438685	+	12.118	shCtrl_rep1
Chr10	120513910	120521095	120518896	120520970	+	5.04916	shCtrl_rep1
Chr11	1000431	1003804	1000598	1003721	+	13.1278	shCtrl_rep1
Chr11	6932093	6943641	6943215	6943545	+	3.02949	shCtrl_rep1
Chr11	12862249	12864900	12862314	12864837	+	2.01966	shCtrl_rep1
Chr11	61366044	61367998	61366216	61367922	+	6.05899	shCtrl_rep1
Chr11	62781893	62782825	62782333	62782692	+	5.04916	shCtrl_rep1
Chr11	65032167	65032551	65032203	65032430	+	6.05899	shCtrl_rep1
Chr11	67392653	67396021	67393610	67393690	+	1.00983	shCtrl_rep1
Chr12	68835828	68836749	68835984	68836671	+	4.03932	shCtrl_rep1
Chr12	69800208	69801721	69800337	69801608	+	3.02949	shCtrl_rep1
Chr12	106999550	107000082	106999862	106999941	-	7.06882	shCtrl_rep1
Chr12	112075677	112078741	112078266	112078633	-	2.01966	shCtrl_rep1
Chr12	120142506	120142941	120142722	120142823	-	3.02949	shCtrl_rep1
Chr12	120154969	120155719	120155430	120155591	-	84.8258	shCtrl_rep1
Chr12	120557339	120557682	120557466	120557545	+	8.07865	shCtrl_rep1
Chr12	128808787	128815070	128808956	128809395	-	2.01966	shCtrl_rep1
Chr12	132525733	132548032	132525823	132527952	+	11.1081	shCtrl_rep1
Chr12	132734384	132735512	132734575	132735405	-	2.01966	shCtrl_rep1
Chr13	19851354	19852190	19851448	19851688	-	2.01966	shCtrl_rep1
Chr13	19993062	19993919	19993564	19993825	+	1.00983	shCtrl_rep1
Chr14	30878810	30879485	30878944	30879422	+	2.01966	shCtrl_rep1
Chr14	73244643	73246175	73244759	73245635	+	11.1081	shCtrl_rep1
Chr14	102040235	102040673	102040410	102040597	+	10.0983	shCtrl_rep1
Chr14	103467078	103475210	103467191	103468080	+	3.02949	shCtrl_rep1
Chr16	3679718	3689137	3679790	3685995	-	5.04916	shCtrl_rep1
Chr16	28955977	28964039	28956058	28956150	+	8.07865	shCtrl_rep1
Chr16	58675939	58676346	58676054	58676288	-	22.2163	shCtrl_rep1
Chr16	89977638	89978878	89977802	89978809	+	2.01966	shCtrl_rep1
Chr17	1636708	1637062	1636855	1636940	-	4.03932	shCtrl_rep1
Chr17	36509061	36511455	36510917	36511364	-	12.118	shCtrl_rep1
Chr17	75917731	75918269	75917850	75917930	-	15.1475	shCtrl_rep1
Chr17	75937565	75938232	75937593	75938146	-	11.1081	shCtrl_rep1
Chr17	76312869	76313891	76313016	76313820	-	3.02949	shCtrl_rep1
Chr18	59438110	59439816	59439578	59439676	-	2.01966	shCtrl_rep1
Chr19	311844	313643	311939	312190	-	6.05899	shCtrl_rep1
Chr19	330263	336173	334542	336082	-	4.03932	shCtrl_rep1
Chr19	334399	336173	334542	336082	-	3.02949	shCtrl_rep1
Chr19	1218416	1219413	1218500	1219323	+	7.06882	shCtrl_rep1
Chr19	2137726	2138714	2137807	2138618	-	5.04916	shCtrl_rep1
Chr19	3660965	3662001	3661083	3661870	-	7.06882	shCtrl_rep1
Chr19	4941527	4941931	4941628	4941744	+	16.1573	shCtrl_rep1
Chr19	6453980	6454717	6454475	6454558	-	5.04916	shCtrl_rep1
Chr19	9617044	9618179	9617171	9617620	-	1.00983	shCtrl_rep1
Chr19	10258221	10258685	10258522	10258608	+	17.1671	shCtrl_rep1
Chr19	11113277	11113762	11113449	11113534	+	1.00983	shCtrl_rep1
Chr19	12928341	12928847	12928457	12928534	-	12.118	shCtrl_rep1
Chr19	17162349	17163122	17162466	17162987	+	1.00983	shCtrl_rep1
Chr19	17276494	17276909	17276624	17276822	+	88.8651	shCtrl_rep1
Chr19	17733192	17734416	17733428	17734272	+	1.00983	shCtrl_rep1
Chr19	18537600	18538436	18537773	18538215	-	17.1671	shCtrl_rep1
Chr19	18539370	18539720	18539459	18539550	-	3.02949	shCtrl_rep1
Chr19	19198106	19199234	19198232	19198656	+	5.04916	shCtrl_rep1
Chr19	45263112	45263367	45263166	45263318	+	10.0983	shCtrl_rep1
Chr19	49003278	49007368	49007147	49007301	+	5.04916	shCtrl_rep1
Chr19	49828448	49829090	49828547	49828969	+	2.01966	shCtrl_rep1
Chr19	55098783	55103568	55098858	55098950	-	1.00983	shCtrl_rep1
Chr19	55245119	55245678	55245185	55245264	-	8.07865	shCtrl_rep1
Chr19	56146246	56147208	56146420	56146889	+	5.04916	shCtrl_rep1
Chr2	135126180	135126656	135126249	135126582	+	2.01966	shCtrl_rep1
Chr2	241434157	241435030	241434321	241434961	+	7.06882	shCtrl_rep1
Chr2	241653306	241653610	241653369	241653511	+	5.04916	shCtrl_rep1
Chr20	45815540	45815913	45815745	45815853	+	2.01966	shCtrl_rep1
Chr21	34102834	34103519	34102908	34103496	+	2.01966	shCtrl_rep1
Chr21	46314715	46315547	46315049	46315473	-	3.02949	shCtrl_rep1
Chr22	37812886	37813609	37812988	37813462	+	1.00983	shCtrl_rep1
Chr22	41808874	41810000	41808993	41809878	+	2.01966	shCtrl_rep1
Chr22	41808874	41810291	41808993	41809878	+	3.02949	shCtrl_rep1
Chr22	50467337	50467923	50467448	50467531	-	4.03932	shCtrl_rep1
Chr3	5174016	5174414	5174084	5174343	+	10.0983	shCtrl_rep1
Chr3	49699475	49700709	49700564	49700635	+	6.05899	shCtrl_rep1
Chr3	49847524	49848200	49847608	49848142	-	21.2065	shCtrl_rep1
Chr3	136945582	136946295	136945752	136946151	+	2.01966	shCtrl_rep1
Chr5	6604137	6605408	6604685	6605272	-	8.07865	shCtrl_rep1
Chr5	37351189	37358151	37351356	37352736	-	7.06882	shCtrl_rep1
Chr6	10702368	10702639	10702489	10702564	+	2.01966	shCtrl_rep1
Chr6	43138848	43139525	43139271	43139405	+	2.01966	shCtrl_rep1
Chr6	52267864	52269226	52267968	52269085	-	6.05899	shCtrl_rep1
Chr6	73466208	73466606	73466408	73466488	+	3.02949	shCtrl_rep1
Chr7	43965866	43966395	43965961	43966263	-	5.04916	shCtrl_rep1
Chr7	64543706	64544432	64543802	64544305	-	8.07865	shCtrl_rep1
Chr7	99390892	99391253	99391099	99391177	+	9.08848	shCtrl_rep1
Chr8	18799294	18804898	18804602	18804703	-	3.02949	shCtrl_rep1
Chr8	47849153	47852784	47849303	47849378	-	5.04916	shCtrl_rep1
Chr8	144829042	144829604	144829090	144829477	+	8.07865	shCtrl_rep1
Chr9	128352637	128353541	128353234	128353414	+	5.04916	shCtrl_rep1
Chr9	131506113	131506453	131506220	131506402	+	28.2753	shCtrl_rep1
Chr9	135881632	135883078	135881794	135882815	-	23.2261	shCtrl_rep1
Chr9	137564433	137565154	137564606	137564892	-	2.01966	shCtrl_rep1
ChrX	54465450	54465852	54465589	54465695	-	5.04916	shCtrl_rep1
ChrX	101041316	101042312	101041371	101042041	-	9.08848	shCtrl_rep1
ChrX	107088435	107088839	107088573	107088734	-	117.14	shCtrl_rep1
ChrX	153963224	153964726	153964284	153964577	-	3.02949	shCtrl_rep1
Chr1	930154	931089	930336	931038	+	3.23528	shCtrl_rep2
Chr1	1256991	1263386	1257130	1257207	-	4.04409	shCtrl_rep2
Chr1	1299344	1304143	1303281	1304085	-	1.61764	shCtrl_rep2
Chr1	1669663	1670151	1669736	1670097	-	1.61764	shCtrl_rep2
Chr1	1825396	1839238	1825499	1839189	-	2.42646	shCtrl_rep2
Chr1	2055440	2059591	2055562	2056483	+	2.42646	shCtrl_rep2
Chr1	9595889	9597053	9596010	9596858	+	1.61764	shCtrl_rep2
Chr1	9931890	9934860	9932898	9934761	-	1.61764	shCtrl_rep2
Chr1	11658266	11658871	11658393	11658532	+	2.42646	shCtrl_rep2
Chr1	11675081	11680613	11676948	11677542	-	1.61764	shCtrl_rep2
Chr1	15717892	15721388	15717992	15718537	+	4.85291	shCtrl_rep2
Chr1	15867878	15876678	15867976	15872815	+	1.61764	shCtrl_rep2
Chr1	15872815	15876678	15873136	15876201	+	12.1323	shCtrl_rep2
Chr1	16201781	16202574	16201861	16202415	-	1.61764	shCtrl_rep2
Chr1	17602126	17607977	17603591	17607801	+	2.42646	shCtrl_rep2
Chr1	20749722	20773610	20771073	20773450	-	3.23528	shCtrl_rep2
Chr1	20770929	20773610	20771073	20773450	-	1.61764	shCtrl_rep2
Chr1	20893516	20895501	20893636	20895367	-	2.42646	shCtrl_rep2
Chr1	23750844	23752518	23752030	23752406	+	1.61764	shCtrl_rep2
Chr1	23772110	23772426	23772166	23772267	-	2.42646	shCtrl_rep2
Chr1	23814189	23820593	23814338	23816674	-	2.42646	shCtrl_rep2
Chr1	26941456	26941818	26941660	26941752	+	0.808819	shCtrl_rep2
Chr1	26942659	26943065	26942776	26942870	+	7.27937	shCtrl_rep2
Chr1	32224033	32224475	32224121	32224409	+	10.5146	shCtrl_rep2
Chr1	32326938	32327677	32327077	32327535	+	4.04409	shCtrl_rep2
Chr1	32631826	32634792	32634072	32634701	-	1.61764	shCtrl_rep2
Chr1	42227882	42311110	42278672	42311049	-	3.23528	shCtrl_rep2
Chr1	42265114	42311110	42278672	42311049	-	4.04409	shCtrl_rep2
Chr1	42265114	42323827	42278672	42311049	-	3.23528	shCtrl_rep2
Chr1	45591222	45606591	45605016	45606481	+	2.42646	shCtrl_rep2
Chr1	48451551	48453131	48451600	48452993	-	3.23528	shCtrl_rep2
Chr1	52854464	52860871	52857749	52860730	+	1.61764	shCtrl_rep2
Chr1	53787157	53789196	53787258	53789132	-	0.808819	shCtrl_rep2
Chr1	64989434	64993581	64991441	64993476	-	1.61764	shCtrl_rep2
Chr1	77711746	77715868	77713281	77714613	-	3.23528	shCtrl_rep2
Chr1	88770351	88771879	88771566	88771662	+	1.61764	shCtrl_rep2
Chr1	110049111	110049560	110049238	110049459	+	1.61764	shCtrl_rep2
Chr1	116384013	116401655	116401006	116401129	+	3.23528	shCtrl_rep2
Chr1	151139424	151140090	151139701	151139975	-	2.42646	shCtrl_rep2
Chr1	151239954	151242567	151240039	151242437	+	1.61764	shCtrl_rep2
Chr1	154260891	154266568	154261109	154261591	+	1.61764	shCtrl_rep2
Chr1	155676547	155679512	155676746	155679157	-	2.42646	shCtrl_rep2
Chr1	155725381	155726019	155725490	155725926	+	8.89701	shCtrl_rep2
Chr1	155915872	155917672	155916737	155917498	-	2.42646	shCtrl_rep2
Chr1	155926675	155927156	155926839	155927103	-	0.808819	shCtrl_rep2
Chr1	160355654	160355958	160355757	160355862	+	2.42646	shCtrl_rep2
Chr1	179063926	179064496	179064098	179064304	+	11.3235	shCtrl_rep2
Chr1	215575900	215579137	215577728	215578000	+	1.61764	shCtrl_rep2
Chr1	224952669	224968874	224967583	224968758	+	3.23528	shCtrl_rep2
Chr1	224952669	225007544	224974153	225002782	+	3.23528	shCtrl_rep2
Chr1	225038693	225043789	225038823	225042834	+	1.61764	shCtrl_rep2
Chr1	225038693	225043983	225038823	225042834	+	2.42646	shCtrl_rep2
Chr1	226961376	226965737	226965410	226965670	+	0.808819	shCtrl_rep2
Chr1	229495494	229498306	229496047	229498135	-	1.61764	shCtrl_rep2
Chr1	229539455	229547701	229542371	229547498	-	1.61764	shCtrl_rep2
Chr1	233217898	233227371	233217931	233218030	-	1.61764	shCtrl_rep2
Chr1	233217898	233236980	233217931	233218030	-	1.61764	shCtrl_rep2
Chr1	235341707	235342883	235342346	235342835	+	4.85291	shCtrl_rep2
Chr1	235494680	235496308	235494828	235496185	-	4.85291	shCtrl_rep2
Chr1	236178413	236183906	236178636	236179878	+	3.23528	shCtrl_rep2
Chr1	244843134	244848856	244846706	244847001	-	5.66173	shCtrl_rep2
Chr10	7220410	7285954	7284150	7285865	-	2.42646	shCtrl_rep2
Chr10	7276891	7285954	7284150	7285865	-	1.61764	shCtrl_rep2
Chr10	73571420	73576361	73575675	73576135	-	8.89701	shCtrl_rep2
Chr10	73575511	73576361	73575675	73576135	-	5.66173	shCtrl_rep2
Chr10	73819531	73824084	73819645	73821681	-	2.42646	shCtrl_rep2
Chr10	75219062	75219356	75219215	75219303	+	2.42646	shCtrl_rep2
Chr10	91992118	91997751	91996570	91997602	+	2.42646	shCtrl_rep2
Chr10	91994534	92008275	91996570	91997602	+	2.42646	shCtrl_rep2
Chr10	92008828	92009208	92008950	92009040	+	8.08819	shCtrl_rep2
Chr10	97436416	97437750	97437275	97437699	-	2.42646	shCtrl_rep2
Chr10	97437190	97437750	97437275	97437699	-	75.2202	shCtrl_rep2
Chr10	97437190	97438703	97437275	97437699	-	4.85291	shCtrl_rep2
Chr10	97476682	97481042	97478389	97480941	-	1.61764	shCtrl_rep2
Chr10	97743093	97744915	97743164	97744728	+	3.23528	shCtrl_rep2
Chr10	98162882	98163397	98162975	98163292	+	3.23528	shCtrl_rep2
Chr10	100178132	100179247	100178194	100179200	-	2.42646	shCtrl_rep2
Chr10	100979847	100981229	100980693	100980821	+	3.23528	shCtrl_rep2
Chr10	102157018	102158214	102157074	102157185	+	2.42646	shCtrl_rep2
Chr10	103438014	103438808	103438071	103438685	+	8.89701	shCtrl_rep2
Chr10	103439745	103440850	103440581	103440733	+	2.42646	shCtrl_rep2
Chr10	103570871	103571822	103571113	103571500	+	0.808819	shCtrl_rep2
Chr10	103622469	103661114	103627202	103660982	-	2.42646	shCtrl_rep2
Chr10	110596397	110598290	110596550	110598138	+	6.47055	shCtrl_rep2
Chr10	119847612	119853172	119849576	119853049	-	1.61764	shCtrl_rep2
Chr10	121515116	121520169	121515319	121517318	-	1.61764	shCtrl_rep2
Chr10	122488901	122489626	122489001	122489421	+	1.61764	shCtrl_rep2
Chr10	133395712	133396267	133395777	133396162	+	3.23528	shCtrl_rep2
Chr10	133395712	133398515	133395777	133396162	+	4.04409	shCtrl_rep2
Chr10	133395712	133402245	133395777	133396162	+	4.85291	shCtrl_rep2
Chr11	230451	233534	233215	233342	-	1.61764	shCtrl_rep2
Chr11	581491	582081	581606	581961	+	8.89701	shCtrl_rep2
Chr11	581491	587464	581606	581961	+	5.66173	shCtrl_rep2
Chr11	581491	592674	581606	581961	+	0.808819	shCtrl_rep2
Chr11	1000431	1003804	1000598	1003721	+	4.04409	shCtrl_rep2
Chr11	1438305	1443403	1443139	1443334	+	1.61764	shCtrl_rep2
Chr11	1480392	1480885	1480486	1480724	-	5.66173	shCtrl_rep2
Chr11	9429673	9431003	9429834	9430874	+	1.61764	shCtrl_rep2
Chr11	9429673	9433846	9433636	9433720	+	0.808819	shCtrl_rep2
Chr11	12473744	12477949	12473834	12473912	+	3.23528	shCtrl_rep2
Chr11	12862249	12864900	12862314	12864837	+	0.808819	shCtrl_rep2
Chr11	17878207	18010139	18008076	18010070	-	4.04409	shCtrl_rep2
Chr11	17926737	18010139	18008076	18010070	-	2.42646	shCtrl_rep2
Chr11	17988596	18010139	18008076	18010070	-	3.23528	shCtrl_rep2
Chr11	18000496	18010139	18006746	18007940	-	1.61764	shCtrl_rep2
Chr11	34086063	34086413	34086219	34086304	+	2.42646	shCtrl_rep2
Chr11	34089394	34092056	34090289	34090528	+	4.04409	shCtrl_rep2
Chr11	34090178	34092056	34090289	34090528	+	3.23528	shCtrl_rep2
Chr11	47625673	47627127	47625741	47627079	-	10.5146	shCtrl_rep2
Chr11	61366044	61367998	61366216	61367922	+	11.3235	shCtrl_rep2
Chr11	62781893	62782825	62782333	62782692	+	1.61764	shCtrl_rep2
Chr11	62827154	62827631	62827398	62827560	-	1.61764	shCtrl_rep2
Chr11	62839113	62839428	62839235	62839321	-	2.42646	shCtrl_rep2
Chr11	62839321	62839867	62839428	62839506	-	4.04409	shCtrl_rep2
Chr11	62853074	62853590	62853115	62853551	-	1.61764	shCtrl_rep2
Chr11	63651935	63652575	63651986	63652470	-	0.808819	shCtrl_rep2
Chr11	65393572	65394425	65393674	65394040	+	4.85291	shCtrl_rep2
Chr11	65526961	65537880	65537128	65537808	+	2.42646	shCtrl_rep2
Chr11	66238803	66239277	66238846	66239141	+	1.61764	shCtrl_rep2
Chr11	67393495	67393790	67393610	67393690	+	1.61764	shCtrl_rep2
Chr11	67393495	67396400	67393610	67393690	+	1.61764	shCtrl_rep2
Chr11	67432355	67432657	67432492	67432599	+	3.23528	shCtrl_rep2
Chr11	67584684	67585241	67584772	67585037	+	2.42646	shCtrl_rep2
Chr11	73707419	73718890	73716362	73718784	-	4.04409	shCtrl_rep2
Chr11	74203727	74204445	74203821	74204352	+	3.23528	shCtrl_rep2
Chr11	77374327	77379994	77379388	77379893	-	1.61764	shCtrl_rep2
Chr11	86255221	86256512	86255287	86256386	+	0.808819	shCtrl_rep2
Chr11	116863667	116873636	116868089	116870330	-	1.61764	shCtrl_rep2
Chr11	117238600	117239860	117239111	117239800	+	1.61764	shCtrl_rep2
Chr11	118554458	118559864	118557890	118559784	-	1.61764	shCtrl_rep2
Chr11	126272968	126273454	126273079	126273315	+	0.808819	shCtrl_rep2
Chr12	929763	930144	929886	930050	-	1.61764	shCtrl_rep2
Chr12	6563314	6563946	6563514	6563613	-	0.808819	shCtrl_rep2
Chr12	10718087	10719143	10718121	10719079	-	0.808819	shCtrl_rep2
Chr12	26996741	27003390	26999676	27003235	-	1.61764	shCtrl_rep2
Chr12	28255580	28259442	28255662	28257201	+	1.61764	shCtrl_rep2
Chr12	38670728	38677554	38675774	38677451	-	3.23528	shCtrl_rep2
Chr12	42210354	42210680	42210454	42210547	-	4.85291	shCtrl_rep2
Chr12	49097565	49098105	49097739	49097943	-	0.808819	shCtrl_rep2
Chr12	51049033	51058128	51056245	51056349	+	2.42646	shCtrl_rep2
Chr12	53055185	53055845	53055690	53055780	+	1.61764	shCtrl_rep2
Chr12	56670274	56671847	56670364	56671748	-	3.23528	shCtrl_rep2
Chr12	57498156	57498623	57498273	57498419	+	0.808819	shCtrl_rep2
Chr12	69256696	69262562	69256842	69257731	+	1.61764	shCtrl_rep2
Chr12	69530864	69532056	69530960	69532013	+	3.23528	shCtrl_rep2
Chr12	69800208	69801721	69800337	69801608	+	10.5146	shCtrl_rep2
Chr12	70278131	70311017	70285586	70294236	+	7.27937	shCtrl_rep2
Chr12	108531203	108537595	108536785	108537487	-	1.61764	shCtrl_rep2
Chr12	108652271	108654410	108652417	108653037	-	7.27937	shCtrl_rep2
Chr12	110292019	110296737	110292124	110296598	+	0.808819	shCtrl_rep2
Chr12	111552279	111555919	111554217	111555882	-	3.23528	shCtrl_rep2
Chr12	111554157	111555919	111554217	111555882	-	1.61764	shCtrl_rep2
Chr12	116230532	116237705	116236890	116237467	-	1.61764	shCtrl_rep2
Chr12	116236820	116237705	116236890	116237467	-	1.61764	shCtrl_rep2
Chr12	116740344	116741094	116740521	116741035	+	4.04409	shCtrl_rep2
Chr12	116945363	116949706	116945528	116949617	+	1.61764	shCtrl_rep2
Chr12	120154969	120155719	120155430	120155591	-	69.5584	shCtrl_rep2
Chr12	120557281	120557682	120557466	120557545	+	6.47055	shCtrl_rep2
Chr12	122584277	122594385	122591453	122594275	+	1.61764	shCtrl_rep2
Chr12	123645454	123652735	123645561	123650993	+	2.42646	shCtrl_rep2
Chr12	124952397	124954211	124952570	124953879	-	2.42646	shCtrl_rep2
Chr12	132147280	132148895	132147388	132147632	+	2.42646	shCtrl_rep2
Chr12	132525733	132527988	132525823	132527952	+	1.61764	shCtrl_rep2
Chr12	132525733	132548032	132525823	132527952	+	4.04409	shCtrl_rep2
Chr12	132734384	132735512	132734575	132735405	-	26.691	shCtrl_rep2
Chr12	132782295	132784307	132782493	132784163	-	1.61764	shCtrl_rep2
Chr12	132945620	132948270	132945797	132948147	-	1.61764	shCtrl_rep2
Chr13	19851354	19852190	19851448	19851688	-	0.808819	shCtrl_rep2
Chr13	19993062	19993919	19993564	19993825	+	3.23528	shCtrl_rep2
Chr13	100634804	100638022	100637702	100637929	-	2.42646	shCtrl_rep2
Chr13	106557047	106559657	106557616	106559431	-	1.61764	shCtrl_rep2
Chr13	110634544	110635588	110634776	110635467	+	1.61764	shCtrl_rep2
Chr13	110893027	110894393	110893263	110894108	-	1.61764	shCtrl_rep2
Chr14	24266429	24268619	24268420	24268513	-	2.42646	shCtrl_rep2
Chr14	30878810	30879485	30878944	30879422	+	8.08819	shCtrl_rep2
Chr14	39179090	39179462	39179246	39179323	+	1.61764	shCtrl_rep2
Chr14	45096423	45096758	45096492	45096595	+	1.61764	shCtrl_rep2
Chr14	49664625	49665163	49664674	49665106	-	2.42646	shCtrl_rep2
Chr14	61721508	61721823	61721654	61721738	+	3.23528	shCtrl_rep2
Chr14	73147794	73148106	73147876	73147966	+	2.42646	shCtrl_rep2
Chr14	73239772	73244759	73239832	73244643	+	2.42646	shCtrl_rep2
Chr14	73244643	73246175	73245696	73246072	+	13.7499	shCtrl_rep2
Chr14	89180700	89190449	89180806	89190383	-	1.61764	shCtrl_rep2
Chr14	95140658	95141748	95141187	95141682	-	3.23528	shCtrl_rep2
Chr14	103498501	103500200	103498528	103500155	+	1.61764	shCtrl_rep2
Chr14	105226068	105228913	105226760	105228819	-	1.61764	shCtrl_rep2
Chr14	105445417	105450184	105445511	105445666	+	3.23528	shCtrl_rep2
Chr15	22927905	22932340	22928028	22932222	-	2.42646	shCtrl_rep2
Chr15	25405460	25411971	25408684	25409087	-	4.04409	shCtrl_rep2
Chr15	25405460	25415842	25407212	25408619	-	3.23528	shCtrl_rep2
Chr15	28260776	28263169	28260970	28262917	-	4.04409	shCtrl_rep2
Chr15	69436137	69436722	69436261	69436563	+	0.808819	shCtrl_rep2
Chr15	74619196	74620225	74619348	74620008	+	1.61764	shCtrl_rep2
Chr15	78542176	78542645	78542219	78542482	+	1.61764	shCtrl_rep2
Chr15	84687624	84691644	84687774	84691534	-	1.61764	shCtrl_rep2
Chr15	84797868	84799977	84798045	84798314	+	2.42646	shCtrl_rep2
Chr15	84838979	84840932	84839097	84839701	+	0.808819	shCtrl_rep2
Chr15	85113872	85115487	85114037	85115438	+	0.808819	shCtrl_rep2
Chr15	89888520	89889140	89888632	89889048	-	4.85291	shCtrl_rep2
Chr15	90979157	90981981	90981669	90981747	-	1.61764	shCtrl_rep2
Chr15	101291961	101293172	101292040	101293024	-	1.61764	shCtrl_rep2
Chr16	533945	536142	533998	536028	+	42.8674	shCtrl_rep2
Chr16	668655	671000	670175	670248	+	1.61764	shCtrl_rep2
Chr16	1390631	1394215	1392976	1394130	-	1.61764	shCtrl_rep2
Chr16	1392890	1394215	1392976	1394130	-	1.61764	shCtrl_rep2
Chr16	1809237	1809833	1809382	1809753	-	1.61764	shCtrl_rep2
Chr16	3679718	3689137	3679790	3685995	-	0.808819	shCtrl_rep2
Chr16	4332214	4333519	4332452	4333346	+	4.85291	shCtrl_rep2
Chr16	4671390	4673657	4672516	4673497	+	1.61764	shCtrl_rep2
Chr16	4760491	4766076	4762756	4765564	-	2.42646	shCtrl_rep2
Chr16	8858349	8859335	8858472	8859170	-	0.808819	shCtrl_rep2
Chr16	11894953	11898035	11896785	11897839	-	1.61764	shCtrl_rep2
Chr16	23486014	23488709	23486152	23486709	-	1.61764	shCtrl_rep2
Chr16	29963109	29971578	29968254	29971407	+	3.23528	shCtrl_rep2
Chr16	30771832	30772190	30771973	30772088	+	1.61764	shCtrl_rep2
Chr16	31722625	31723353	31722752	31723257	+	14.5587	shCtrl_rep2
Chr16	58670112	58672243	58671244	58672095	-	1.61764	shCtrl_rep2
Chr16	58675939	58676346	58676054	58676288	-	6.47055	shCtrl_rep2
Chr16	67729937	67744455	67730046	67731471	-	4.04409	shCtrl_rep2
Chr16	71879906	71883273	71880023	71881316	-	2.42646	shCtrl_rep2
Chr16	72014472	72024195	72022475	72023164	+	2.42646	shCtrl_rep2
Chr16	72811576	72812038	72811777	72811904	-	1.61764	shCtrl_rep2
Chr16	88027482	88038011	88033245	88035322	+	3.23528	shCtrl_rep2
Chr16	89305205	89317075	89305344	89316932	-	7.27937	shCtrl_rep2
Chr16	89895037	89900794	89898872	89900634	+	0.808819	shCtrl_rep2
Chr16	89977638	89978878	89977802	89978809	+	0.808819	shCtrl_rep2
Chr16	89977677	89978878	89977802	89978809	+	1.61764	shCtrl_rep2
Chr16	89978809	89980336	89978878	89980241	+	0.808819	shCtrl_rep2
Chr17	1354210	1362008	1354347	1361091	-	3.23528	shCtrl_rep2
Chr17	4173353	4179877	4173444	4173908	-	2.42646	shCtrl_rep2
Chr17	5460938	5462546	5461109	5462318	-	5.66173	shCtrl_rep2
Chr17	8206490	8207840	8206639	8206749	-	2.42646	shCtrl_rep2
Chr17	18100362	18101590	18100659	18101492	+	2.42646	shCtrl_rep2
Chr17	18340042	18340813	18340255	18340731	-	5.66173	shCtrl_rep2
Chr17	31878249	31880754	31878781	31880572	-	2.42646	shCtrl_rep2
Chr17	32173830	32175362	32173912	32175318	+	5.66173	shCtrl_rep2
Chr17	35833906	35834598	35833941	35834565	+	2.42646	shCtrl_rep2
Chr17	36503096	36505404	36504020	36505296	-	1.61764	shCtrl_rep2
Chr17	36508896	36511455	36510917	36511364	-	4.85291	shCtrl_rep2
Chr17	36509061	36511455	36510917	36511364	-	8.89701	shCtrl_rep2
Chr17	39708320	39710481	39710201	39710339	+	1.61764	shCtrl_rep2
Chr17	40181615	40192263	40191494	40191581	+	2.42646	shCtrl_rep2
Chr17	44154555	44155411	44154664	44154852	+	8.89701	shCtrl_rep2
Chr17	45120324	45121372	45121130	45121210	-	3.23528	shCtrl_rep2
Chr17	46169530	46172232	46169605	46170854	-	1.61764	shCtrl_rep2
Chr17	47154671	47158303	47157124	47157229	-	1.61764	shCtrl_rep2
Chr17	47618349	47619784	47618457	47619008	+	1.61764	shCtrl_rep2
Chr17	47664158	47674782	47665158	47668185	+	1.61764	shCtrl_rep2
Chr17	48112030	48113401	48112111	48112573	+	5.66173	shCtrl_rep2
Chr17	48848321	48849377	48848455	48849251	+	1.61764	shCtrl_rep2
Chr17	54938923	54947312	54939020	54947260	+	4.85291	shCtrl_rep2
Chr17	59935192	59940943	59936541	59940835	+	1.61764	shCtrl_rep2
Chr17	59936214	59936541	59936277	59936463	+	2.42646	shCtrl_rep2
Chr17	61776400	61780401	61776562	61780260	-	2.42646	shCtrl_rep2
Chr17	75242335	75243570	75243166	75243446	-	0.808819	shCtrl_rep2
Chr17	75917731	75918269	75917850	75917930	-	1.61764	shCtrl_rep2
Chr17	75937565	75938232	75937593	75938146	-	1.61764	shCtrl_rep2
Chr17	76312869	76313891	76313016	76313820	-	31.5439	shCtrl_rep2
Chr17	80049905	80050283	80049989	80050063	+	2.42646	shCtrl_rep2
Chr17	81053667	81057967	81053743	81057880	+	1.61764	shCtrl_rep2
Chr17	81206743	81207239	81206871	81207124	-	2.42646	shCtrl_rep2
Chr17	82563353	82568201	82563548	82568053	+	1.61764	shCtrl_rep2
Chr17	82903404	82911789	82907821	82909284	+	1.61764	shCtrl_rep2
Chr17	82905935	82911789	82906053	82907760	+	2.42646	shCtrl_rep2
Chr17	83005114	83014519	83005210	83014453	-	1.61764	shCtrl_rep2
Chr18	9931809	9937066	9936213	9936985	+	0.808819	shCtrl_rep2
Chr18	9936109	9937066	9936213	9936985	+	0.808819	shCtrl_rep2
Chr18	12420324	12421629	12420493	12421539	+	4.04409	shCtrl_rep2
Chr18	46815311	46821072	46815349	46820932	-	5.66173	shCtrl_rep2
Chr18	46946056	46946923	46946275	46946853	+	3.23528	shCtrl_rep2
Chr18	79728906	79736521	79729069	79736354	+	4.04409	shCtrl_rep2
Chr19	430683	440932	436431	436629	-	2.42646	shCtrl_rep2
Chr19	1218416	1219413	1218500	1219323	+	5.66173	shCtrl_rep2
Chr19	1357008	1366381	1357094	1358393	+	1.61764	shCtrl_rep2
Chr19	2137726	2138714	2137807	2138618	-	5.66173	shCtrl_rep2
Chr19	2438162	2438531	2438288	2438374	-	1.61764	shCtrl_rep2
Chr19	3660965	3662001	3661083	3661870	-	10.5146	shCtrl_rep2
Chr19	4941527	4941931	4941628	4941744	+	16.1764	shCtrl_rep2
Chr19	5039835	5041251	5040011	5041136	+	2.42646	shCtrl_rep2
Chr19	5604582	5604936	5604695	5604786	-	0.808819	shCtrl_rep2
Chr19	10154292	10155056	10154773	10154904	-	0.808819	shCtrl_rep2
Chr19	10258221	10258685	10258522	10258608	+	19.4117	shCtrl_rep2
Chr19	11100222	11107514	11100345	11102663	+	1.61764	shCtrl_rep2
Chr19	12679456	12680325	12679922	12680195	-	2.42646	shCtrl_rep2
Chr19	12714820	12715739	12714939	12715046	-	2.42646	shCtrl_rep2
Chr19	12715046	12715739	12715169	12715242	-	0.808819	shCtrl_rep2
Chr19	12928341	12928847	12928457	12928534	-	16.9852	shCtrl_rep2
Chr19	13927892	13928188	13928030	13928123	+	2.42646	shCtrl_rep2
Chr19	14039507	14039910	14039665	14039752	+	3.23528	shCtrl_rep2
Chr19	15170085	15170825	15170553	15170670	-	1.61764	shCtrl_rep2
Chr19	16088026	16089120	16088097	16089044	+	1.61764	shCtrl_rep2
Chr19	17156908	17163122	17162466	17162987	+	1.61764	shCtrl_rep2
Chr19	17162349	17163122	17162466	17162987	+	2.42646	shCtrl_rep2
Chr19	17276494	17276909	17276624	17276822	+	53.382	shCtrl_rep2
Chr19	18175039	18175697	18175222	18175310	+	2.42646	shCtrl_rep2
Chr19	18436683	18437296	18436877	18436972	-	1.61764	shCtrl_rep2
Chr19	18537600	18538433	18537773	18538215	-	2.42646	shCtrl_rep2
Chr19	18537600	18538436	18537773	18538215	-	6.47055	shCtrl_rep2
Chr19	18539370	18539720	18539459	18539550	-	11.3235	shCtrl_rep2
Chr19	19640084	19640571	19640360	19640445	-	3.23528	shCtrl_rep2
Chr19	21098184	21098910	21098311	21098811	+	3.23528	shCtrl_rep2
Chr19	37583970	37586745	37584097	37586667	-	1.61764	shCtrl_rep2
Chr19	38917723	38918813	38918008	38918093	-	3.23528	shCtrl_rep2
Chr19	40237968	40240110	40238973	40240044	-	0.808819	shCtrl_rep2
Chr19	40583397	40583717	40583485	40583600	+	0.808819	shCtrl_rep2
Chr19	45263112	45263367	45263166	45263318	+	3.23528	shCtrl_rep2
Chr19	45263112	45266281	45263166	45263318	+	3.23528	shCtrl_rep2
Chr19	45280373	45280734	45280483	45280574	+	1.61764	shCtrl_rep2
Chr19	45357269	45357699	45357543	45357629	-	1.61764	shCtrl_rep2
Chr19	47040443	47042904	47040550	47040977	+	2.42646	shCtrl_rep2
Chr19	47081512	47082295	47081622	47082183	-	1.61764	shCtrl_rep2
Chr19	47264602	47264946	47264686	47264772	+	9.70583	shCtrl_rep2
Chr19	47416651	47417350	47416702	47416803	-	3.23528	shCtrl_rep2
Chr19	49171356	49171769	49171418	49171577	+	1.61764	shCtrl_rep2
Chr19	49828448	49829090	49828547	49828969	+	2.42646	shCtrl_rep2
Chr19	52076043	52077084	52076172	52076957	-	2.42646	shCtrl_rep2
Chr19	55098783	55103568	55098858	55098950	-	3.23528	shCtrl_rep2
Chr19	55140882	55141302	55140960	55141185	-	1.61764	shCtrl_rep2
Chr19	55245119	55245678	55245402	55245491	-	3.23528	shCtrl_rep2
Chr19	56146246	56147208	56146420	56146889	+	1.61764	shCtrl_rep2
Chr2	24554388	24564430	24554573	24556014	+	1.61764	shCtrl_rep2
Chr2	25799384	25806337	25799535	25806228	-	1.61764	shCtrl_rep2
Chr2	28946449	28947161	28946499	28946599	+	0.808819	shCtrl_rep2
Chr2	30525586	30533314	30525755	30533115	+	1.61764	shCtrl_rep2
Chr2	39336919	39337581	39336967	39337525	-	6.47055	shCtrl_rep2
Chr2	43712224	43741043	43738520	43740945	+	1.61764	shCtrl_rep2
Chr2	61311539	61311910	61311687	61311783	-	4.85291	shCtrl_rep2
Chr2	61501995	61502310	61502040	61502248	-	2.42646	shCtrl_rep2
Chr2	61522610	61526521	61522683	61525269	-	2.42646	shCtrl_rep2
Chr2	63942464	63944655	63942561	63944599	-	1.61764	shCtrl_rep2
Chr2	70051202	70085624	70077381	70083506	-	1.61764	shCtrl_rep2
Chr2	72988257	73001578	73000487	73001524	-	1.61764	shCtrl_rep2
Chr2	74377431	74378245	74377466	74377647	-	1.61764	shCtrl_rep2
Chr2	85368685	85369830	85368754	85369738	+	1.61764	shCtrl_rep2
Chr2	85555483	85556260	85555590	85556181	-	4.04409	shCtrl_rep2
Chr2	86127160	86127991	86127305	86127940	+	3.23528	shCtrl_rep2
Chr2	95851693	95860074	95851787	95852125	-	2.42646	shCtrl_rep2
Chr2	96797011	96799648	96797647	96799056	+	1.61764	shCtrl_rep2
Chr2	97657151	97661946	97659003	97659351	-	1.61764	shCtrl_rep2
Chr2	101294013	101295181	101294082	101294930	-	5.66173	shCtrl_rep2
Chr2	105342847	105343223	105342974	105343100	+	1.61764	shCtrl_rep2
Chr2	112501205	112503181	112501341	112502911	+	3.23528	shCtrl_rep2
Chr2	131071854	131082657	131071938	131082576	-	35.588	shCtrl_rep2
Chr2	135126180	135126656	135126249	135126582	+	2.42646	shCtrl_rep2
Chr2	178535731	178542361	178539890	178540106	+	4.85291	shCtrl_rep2
Chr2	178571299	178600667	178597681	178599593	+	2.42646	shCtrl_rep2
Chr2	200856681	200856985	200856811	200856890	-	4.04409	shCtrl_rep2
Chr2	207724799	207726876	207724874	207726841	+	1.61764	shCtrl_rep2
Chr2	216113015	216130987	216116842	216117745	+	1.61764	shCtrl_rep2
Chr2	218727268	218749387	218748934	218749252	+	1.61764	shCtrl_rep2
Chr2	219233078	219233433	219233191	219233285	+	2.42646	shCtrl_rep2
Chr2	239990073	240007370	239990182	240005209	-	34.7792	shCtrl_rep2
Chr2	239990073	240014860	239990182	240005209	-	1.61764	shCtrl_rep2
Chr2	241431678	241435030	241434321	241434961	+	3.23528	shCtrl_rep2
Chr2	241496397	241500796	241499414	241500172	-	4.04409	shCtrl_rep2
Chr2	241654545	241655343	241654647	241655270	+	1.61764	shCtrl_rep2
Chr20	1452492	1458274	1455037	1458199	-	1.61764	shCtrl_rep2
Chr20	32930397	32931336	32930616	32931177	+	1.61764	shCtrl_rep2
Chr20	34470047	34492597	34470120	34471443	+	2.42646	shCtrl_rep2
Chr20	49066191	49066510	49066293	49066364	+	2.42646	shCtrl_rep2
Chr20	49066191	49067280	49066293	49066364	+	1.61764	shCtrl_rep2
Chr20	49066191	49070297	49066293	49066364	+	1.61764	shCtrl_rep2
Chr20	49117125	49135931	49120128	49123091	-	1.61764	shCtrl_rep2
Chr20	50935029	50955285	50945762	50945846	-	1.61764	shCtrl_rep2
Chr20	58895611	58905480	58903585	58903671	+	2.42646	shCtrl_rep2
Chr20	62857394	62859526	62857638	62859363	-	2.42646	shCtrl_rep2
Chr21	15762890	15766141	15762968	15765996	+	0.808819	shCtrl_rep2
Chr21	33426883	33432871	33427032	33432176	+	1.61764	shCtrl_rep2
Chr21	34102834	34103519	34102908	34103496	+	4.04409	shCtrl_rep2
Chr21	42002349	42002961	42002503	42002896	-	7.27937	shCtrl_rep2
Chr21	43959633	43960779	43959859	43960631	+	0.808819	shCtrl_rep2
Chr22	17683213	17702386	17689142	17696140	+	1.61764	shCtrl_rep2
Chr22	18987756	18988195	18987900	18988090	+	1.61764	shCtrl_rep2
Chr22	20400631	20401372	20400758	20401276	+	2.42646	shCtrl_rep2
Chr22	21670565	21675115	21672381	21675063	+	1.61764	shCtrl_rep2
Chr22	21799011	21807846	21799128	21805849	-	1.61764	shCtrl_rep2
Chr22	23683724	23695517	23690356	23694118	-	2.42646	shCtrl_rep2
Chr22	27873737	27897892	27873815	27894554	-	4.85291	shCtrl_rep2
Chr22	27873737	27914347	27873815	27894554	-	1.61764	shCtrl_rep2
Chr22	40953554	40967884	40953633	40964046	+	2.42646	shCtrl_rep2
Chr22	41808874	41810000	41808993	41809878	+	0.808819	shCtrl_rep2
Chr22	42168608	42179702	42168736	42169846	-	2.42646	shCtrl_rep2
Chr22	46792519	46797620	46792804	46793500	+	2.42646	shCtrl_rep2
Chr3	5174016	5174414	5174084	5174343	+	11.3235	shCtrl_rep2
Chr3	9762913	9763213	9763052	9763138	-	1.61764	shCtrl_rep2
Chr3	12489783	12496554	12492217	12496517	+	1.61764	shCtrl_rep2
Chr3	44774394	44815076	44774437	44775253	+	1.61764	shCtrl_rep2
Chr3	47661293	47678311	47661455	47662333	-	1.61764	shCtrl_rep2
Chr3	49847524	49848200	49847560	49848142	-	8.08819	shCtrl_rep2
Chr3	52122378	52125181	52122477	52125112	-	1.61764	shCtrl_rep2
Chr3	56627036	56628614	56627741	56628491	-	3.23528	shCtrl_rep2
Chr3	57864806	57871698	57864857	57865241	+	1.61764	shCtrl_rep2
Chr3	57890040	57896932	57896371	57896510	+	1.61764	shCtrl_rep2
Chr3	71684571	71699708	71696520	71699613	-	1.61764	shCtrl_rep2
Chr3	93995873	94003908	93996684	94003658	+	1.61764	shCtrl_rep2
Chr3	122451533	122452064	122451633	122451975	-	1.61764	shCtrl_rep2
Chr3	128806371	128807671	128806590	128807542	+	0.808819	shCtrl_rep2
Chr3	129832773	129880559	129832826	129880308	-	1.61764	shCtrl_rep2
Chr3	136945582	136946295	136945752	136946151	+	8.89701	shCtrl_rep2
Chr3	138570317	138572984	138570498	138571033	-	1.61764	shCtrl_rep2
Chr3	160413472	160414517	160413613	160414366	+	3.23528	shCtrl_rep2
Chr3	184315762	184316218	184315856	184316071	+	1.61764	shCtrl_rep2
Chr3	186784563	186786051	186784696	186784961	+	0.808819	shCtrl_rep2
Chr3	186797534	186804724	186801195	186804582	-	2.42646	shCtrl_rep2
Chr3	195688532	195689438	195688797	195689338	+	2.42646	shCtrl_rep2
Chr4	2320169	2341615	2339655	2341477	-	2.42646	shCtrl_rep2
Chr4	2339452	2341615	2339655	2341477	-	4.85291	shCtrl_rep2
Chr4	4648976	4649542	4649109	4649369	+	4.85291	shCtrl_rep2
Chr4	55999301	55999645	55999417	55999490	+	1.61764	shCtrl_rep2
Chr4	75790149	75790797	75790238	75790642	+	2.42646	shCtrl_rep2
Chr4	82428017	82428446	82428179	82428277	-	1.61764	shCtrl_rep2
Chr4	88065373	88065879	88065495	88065761	+	1.61764	shCtrl_rep2
Chr4	110632342	110633008	110632480	110632952	-	2.42646	shCtrl_rep2
Chr5	618989	620261	619117	620068	+	21.8381	shCtrl_rep2
Chr5	1063843	1065478	1063975	1064082	-	2.42646	shCtrl_rep2
Chr5	6604137	6605408	6604685	6605272	-	1.61764	shCtrl_rep2
Chr5	14270824	14280436	14270899	14280321	+	4.85291	shCtrl_rep2
Chr5	14741826	14758598	14745962	14749171	-	4.85291	shCtrl_rep2
Chr5	37024584	37027412	37026327	37027358	+	2.42646	shCtrl_rep2
Chr5	37363887	37364384	37363984	37364246	-	1.61764	shCtrl_rep2
Chr5	43161248	43161931	43161613	43161708	+	4.85291	shCtrl_rep2
Chr5	57230845	57231321	57230969	57231097	+	1.61764	shCtrl_rep2
Chr5	69174876	69175537	69175113	69175396	+	2.42646	shCtrl_rep2
Chr5	72887069	72888303	72887222	72888077	+	2.42646	shCtrl_rep2
Chr5	83483512	83493931	83493720	83493803	+	1.61764	shCtrl_rep2
Chr5	134535857	134538083	134535915	134537988	+	1.61764	shCtrl_rep2
Chr5	139363758	139364743	139363922	139364563	+	1.61764	shCtrl_rep2
Chr5	176943334	176970866	176969291	176969600	-	2.42646	shCtrl_rep2
Chr5	178138107	178144108	178138258	178142582	+	1.61764	shCtrl_rep2
Chr5	181241491	181242345	181241639	181242169	-	0.808819	shCtrl_rep2
Chr6	7176654	7189322	7181246	7181869	+	1.61764	shCtrl_rep2
Chr6	31624260	31625314	31624360	31624449	+	1.61764	shCtrl_rep2
Chr6	33776953	33786774	33784427	33786733	-	1.61764	shCtrl_rep2
Chr6	37458611	37463008	37462102	37462828	+	2.42646	shCtrl_rep2
Chr6	43055544	43056445	43056196	43056306	-	5.66173	shCtrl_rep2
Chr6	43138848	43139525	43139271	43139405	+	7.27937	shCtrl_rep2
Chr6	43533906	43548460	43534007	43546570	-	1.61764	shCtrl_rep2
Chr6	52276267	52277198	52276476	52277066	-	1.61764	shCtrl_rep2
Chr6	107503656	107506427	107503795	107506241	+	0.808819	shCtrl_rep2
Chr6	138907494	138914761	138912950	138914696	-	2.42646	shCtrl_rep2
Chr7	851383	853585	852952	853408	+	1.61764	shCtrl_rep2
Chr7	2213211	2230727	2230143	2230548	-	3.23528	shCtrl_rep2
Chr7	2215884	2219456	2215999	2216156	-	2.42646	shCtrl_rep2
Chr7	2229983	2230727	2230143	2230548	-	1.61764	shCtrl_rep2
Chr7	2363631	2364529	2363760	2364371	+	0.808819	shCtrl_rep2
Chr7	2645771	2649988	2649639	2649912	+	1.61764	shCtrl_rep2
Chr7	5739275	5741815	5739352	5740972	-	5.66173	shCtrl_rep2
Chr7	22219865	22318037	22310090	22315369	-	3.23528	shCtrl_rep2
Chr7	23521706	23522432	23521840	23522131	-	3.23528	shCtrl_rep2
Chr7	43986191	43986677	43986312	43986600	-	1.61764	shCtrl_rep2
Chr7	44050224	44052941	44050280	44051829	+	1.61764	shCtrl_rep2
Chr7	64543706	64544432	64543802	64544305	-	8.89701	shCtrl_rep2
Chr7	88209982	88210925	88210130	88210881	-	4.85291	shCtrl_rep2
Chr7	98307688	98320129	98307896	98310444	-	1.61764	shCtrl_rep2
Chr7	100023418	100024307	100023932	100024153	+	6.47055	shCtrl_rep2
Chr7	100105044	100106003	100105346	100105444	+	4.04409	shCtrl_rep2
Chr7	129014978	129018157	129017056	129017956	-	2.42646	shCtrl_rep2
Chr7	151076912	151077236	151077027	151077100	-	1.61764	shCtrl_rep2
Chr7	152783186	152825122	152820442	152823341	+	2.42646	shCtrl_rep2
Chr7	155301565	155302417	155301690	155302250	+	1.61764	shCtrl_rep2
Chr7	156966269	156967092	156966402	156966960	+	2.42646	shCtrl_rep2
Chr8	42401787	42403461	42402015	42403310	+	4.85291	shCtrl_rep2
Chr8	47927193	47927890	47927353	47927770	-	1.61764	shCtrl_rep2
Chr8	61680967	61684188	61681036	61682438	-	4.04409	shCtrl_rep2
Chr8	140864311	140890769	140864399	140879470	-	5.66173	shCtrl_rep2
Chr8	144316852	144318362	144318169	144318260	-	2.42646	shCtrl_rep2
Chr9	33971650	33973237	33971754	33973182	-	2.42646	shCtrl_rep2
Chr9	92034809	92038365	92034883	92038247	-	0.808819	shCtrl_rep2
Chr9	92256679	92269983	92256800	92258853	-	2.42646	shCtrl_rep2
Chr9	92855810	92856318	92855903	92856191	-	8.08819	shCtrl_rep2
Chr9	93238232	93239976	93238321	93239756	+	4.85291	shCtrl_rep2
Chr9	93471140	93476338	93471387	93476255	+	1.61764	shCtrl_rep2
Chr9	105721536	105722621	105721721	105722533	+	7.27937	shCtrl_rep2
Chr9	109263049	109268433	109267551	109268390	-	3.23528	shCtrl_rep2
Chr9	111384521	111385442	111384569	111385336	-	1.61764	shCtrl_rep2
Chr9	122285168	122286166	122285287	122285779	+	1.61764	shCtrl_rep2
Chr9	122285168	122291840	122285287	122285779	+	6.47055	shCtrl_rep2
Chr9	127675803	127676753	127675942	127676643	+	3.23528	shCtrl_rep2
Chr9	128352637	128353541	128353234	128353414	+	4.85291	shCtrl_rep2
Chr9	128523279	128523846	128523340	128523591	+	4.04409	shCtrl_rep2
Chr9	131430089	131432794	131430259	131432616	+	1.61764	shCtrl_rep2
Chr9	131436619	131439061	131436722	131438988	+	5.66173	shCtrl_rep2
Chr9	131506113	131506453	131506220	131506402	+	11.3235	shCtrl_rep2
Chr9	131638634	131650949	131650242	131650809	-	2.42646	shCtrl_rep2
Chr9	131643238	131650949	131650242	131650809	-	7.27937	shCtrl_rep2
Chr9	131650128	131650949	131650242	131650809	-	2.42646	shCtrl_rep2
Chr9	133407806	133408842	133407881	133408767	-	2.42646	shCtrl_rep2
Chr9	133412298	133412921	133412492	133412777	-	12.9411	shCtrl_rep2
Chr9	134401631	134409119	134408299	134408939	+	2.42646	shCtrl_rep2
Chr9	135866455	135883078	135881794	135882815	-	3.23528	shCtrl_rep2
Chr9	135881632	135883078	135881794	135882815	-	244.263	shCtrl_rep2
Chr9	136348696	136349763	136348767	136349586	+	3.23528	shCtrl_rep2
Chr9	136391941	136392777	136392594	136392672	-	4.04409	shCtrl_rep2
Chr9	137564433	137565154	137564606	137564892	-	10.5146	shCtrl_rep2
Chr9	137586966	137588718	137587107	137587716	-	4.85291	shCtrl_rep2
ChrX	2875809	2881224	2875914	2877199	+	1.61764	shCtrl_rep2
ChrX	24821451	24843677	24821583	24826426	+	3.23528	shCtrl_rep2
ChrX	41337407	41339083	41337465	41337690	+	2.42646	shCtrl_rep2
ChrX	101041316	101042312	101041371	101042041	-	2.42646	shCtrl_rep2
ChrX	115633999	115645099	115634081	115634880	+	1.61764	shCtrl_rep2
ChrX	118584734	118590302	118588321	118588412	+	2.42646	shCtrl_rep2
ChrX	119542504	119544491	119542594	119544352	-	2.42646	shCtrl_rep2
ChrX	123610917	123611516	123610963	123611439	-	1.61764	shCtrl_rep2
ChrX	123610917	123613708	123613556	123613638	-	3.23528	shCtrl_rep2
ChrX	123613398	123613708	123613556	123613638	-	3.23528	shCtrl_rep2
ChrX	131749305	131794466	131794115	131794323	-	5.66173	shCtrl_rep2
Chr1	1256991	1257310	1257130	1257207	-	3.45048	shSRSF1_rep1
Chr1	1477273	1480936	1477350	1478643	+	5.17572	shSRSF1_rep1
Chr1	11658266	11658871	11658393	11658532	+	2.58786	shSRSF1_rep1
Chr1	21847353	21849031	21848093	21848642	-	6.03834	shSRSF1_rep1
Chr1	26941456	26941818	26941660	26941752	+	6.90096	shSRSF1_rep1
Chr1	32224033	32224475	32224121	32224409	+	8.62621	shSRSF1_rep1
Chr1	155319610	155319928	155319688	155319793	+	8.62621	shSRSF1_rep1
Chr1	155725381	155726019	155725490	155725926	+	21.5655	shSRSF1_rep1
Chr1	179063926	179064496	179064098	179064304	+	2.58786	shSRSF1_rep1
Chr10	27532506	27533994	27533853	27533927	+	2.58786	shSRSF1_rep1
Chr10	68394074	68394451	68394136	68394327	-	3.45048	shSRSF1_rep1
Chr10	72715110	72715902	72715226	72715853	+	6.90096	shSRSF1_rep1
Chr10	92637183	92645642	92637309	92637386	+	4.3131	shSRSF1_rep1
Chr10	97436416	97437750	97437275	97437699	-	0.862621	shSRSF1_rep1
Chr10	97437190	97437750	97437275	97437699	-	56.0703	shSRSF1_rep1
Chr10	103439745	103440850	103440581	103440733	+	2.58786	shSRSF1_rep1
Chr11	34071725	34076642	34076474	34076559	+	1.72524	shSRSF1_rep1
Chr11	46783273	46788773	46784673	46788680	-	4.3131	shSRSF1_rep1
Chr11	62853074	62853590	62853115	62853551	-	4.3131	shSRSF1_rep1
Chr11	85981744	85982003	85981775	85981871	-	3.45048	shSRSF1_rep1
Chr12	813641	830160	827262	830002	+	6.03834	shSRSF1_rep1
Chr12	56477659	56478262	56478096	56478182	-	25.016	shSRSF1_rep1
Chr12	116230432	116237705	116236890	116237467	-	13.8019	shSRSF1_rep1
Chr12	116740344	116741094	116740521	116741035	+	7.76358	shSRSF1_rep1
Chr12	120154969	120155719	120155040	120155240	-	76.7732	shSRSF1_rep1
Chr12	124952397	124954211	124952570	124953879	-	5.17572	shSRSF1_rep1
Chr13	19851354	19852190	19851448	19851688	-	12.9393	shSRSF1_rep1
Chr13	19993062	19993919	19993564	19993825	+	15.5272	shSRSF1_rep1
Chr13	32517856	32527532	32522270	32527407	-	6.90096	shSRSF1_rep1
Chr14	21503172	21503881	21503577	21503663	-	4.3131	shSRSF1_rep1
Chr14	30878810	30879485	30878944	30879422	+	4.3131	shSRSF1_rep1
Chr14	61721508	61721823	61721654	61721738	+	3.45048	shSRSF1_rep1
Chr14	73244643	73246175	73244759	73245635	+	1.72524	shSRSF1_rep1
Chr14	102040235	102040673	102040410	102040597	+	6.03834	shSRSF1_rep1
Chr15	42634855	42638812	42638087	42638699	+	2.58786	shSRSF1_rep1
Chr15	90980883	90981981	90981669	90981747	-	3.45048	shSRSF1_rep1
Chr16	5027134	5027379	5027198	5027277	-	3.45048	shSRSF1_rep1
Chr16	58675939	58676346	58676054	58676288	-	10.3514	shSRSF1_rep1
Chr16	70468848	70469323	70468968	70469151	+	5.17572	shSRSF1_rep1
Chr17	8255804	8256648	8255910	8256266	+	6.03834	shSRSF1_rep1
Chr17	35820023	35820437	35820075	35820163	+	2.58786	shSRSF1_rep1
Chr17	36509061	36511455	36510917	36511364	-	7.76358	shSRSF1_rep1
Chr17	45120324	45121372	45120454	45120901	-	10.3514	shSRSF1_rep1
Chr17	59936214	59936541	59936277	59936463	+	1.72524	shSRSF1_rep1
Chr17	75208526	75226157	75225829	75226050	+	8.62621	shSRSF1_rep1
Chr17	76312869	76313891	76313016	76313820	-	21.5655	shSRSF1_rep1
Chr19	325634	336173	326598	327132	-	5.17572	shSRSF1_rep1
Chr19	1218416	1219413	1218500	1219323	+	13.8019	shSRSF1_rep1
Chr19	3660965	3662001	3661083	3661870	-	5.17572	shSRSF1_rep1
Chr19	10258221	10258685	10258522	10258608	+	16.3898	shSRSF1_rep1
Chr19	10707301	10713040	10712867	10712952	+	4.3131	shSRSF1_rep1
Chr19	12928341	12928847	12928457	12928534	-	31.0543	shSRSF1_rep1
Chr19	14039507	14039910	14039665	14039752	+	1.72524	shSRSF1_rep1
Chr19	17276494	17276909	17276624	17276822	+	94.8883	shSRSF1_rep1
Chr19	18537600	18538433	18537773	18538215	-	9.48883	shSRSF1_rep1
Chr19	18537600	18538436	18537773	18538215	-	2.58786	shSRSF1_rep1
Chr19	18539370	18539720	18539459	18539550	-	6.03834	shSRSF1_rep1
Chr19	19526181	19527770	19527352	19527700	+	6.90096	shSRSF1_rep1
Chr19	38917723	38918813	38917833	38917920	-	2.58786	shSRSF1_rep1
Chr19	48955547	48955833	48955599	48955686	+	9.48883	shSRSF1_rep1
Chr19	49645020	49645411	49645134	49645353	+	4.3131	shSRSF1_rep1
Chr19	49858056	49860336	49860183	49860267	+	6.90096	shSRSF1_rep1
Chr19	50398850	50399484	50399053	50399370	+	3.45048	shSRSF1_rep1
Chr19	55245119	55245678	55245185	55245264	-	8.62621	shSRSF1_rep1
Chr2	86127160	86127991	86127305	86127940	+	10.3514	shSRSF1_rep1
Chr2	101029490	101032385	101029776	101032267	-	6.03834	shSRSF1_rep1
Chr20	4873935	4874696	4874092	4874575	-	2.58786	shSRSF1_rep1
Chr20	45000391	45025130	45000520	45001166	+	5.17572	shSRSF1_rep1
Chr20	62345817	62347028	62346800	62346912	-	4.3131	shSRSF1_rep1
Chr20	63940377	63945914	63940485	63940593	-	6.90096	shSRSF1_rep1
Chr21	10338454	10340478	10338566	10340413	-	2.58786	shSRSF1_rep1
Chr22	31611142	31611840	31611303	31611765	+	7.76358	shSRSF1_rep1
Chr22	36518762	36519537	36518910	36519404	-	2.58786	shSRSF1_rep1
Chr22	41808874	41810291	41808993	41809878	+	2.58786	shSRSF1_rep1
Chr3	5174016	5174414	5174084	5174343	+	1.72524	shSRSF1_rep1
Chr3	155833467	155834041	155833585	155833856	-	2.58786	shSRSF1_rep1
Chr5	618989	620261	619117	620068	+	28.4665	shSRSF1_rep1
Chr6	52267864	52269226	52267968	52269085	-	9.48883	shSRSF1_rep1
Chr6	52273741	52277688	52277198	52277534	-	4.3131	shSRSF1_rep1
Chr6	73466208	73466606	73466408	73466488	+	0.862621	shSRSF1_rep1
Chr7	40078004	40078851	40078121	40078719	+	3.45048	shSRSF1_rep1
Chr7	73686635	73687095	73686731	73686817	+	6.03834	shSRSF1_rep1
Chr7	99390892	99391253	99391099	99391177	+	13.8019	shSRSF1_rep1
Chr8	18765448	18804898	18804602	18804703	-	15.5272	shSRSF1_rep1
Chr8	18799294	18804898	18804602	18804703	-	9.48883	shSRSF1_rep1
Chr8	61680967	61684188	61681036	61682438	-	0.862621	shSRSF1_rep1
Chr8	142330900	142331831	142330970	142331753	-	15.5272	shSRSF1_rep1
Chr9	131508910	131510415	131510062	131510259	+	3.45048	shSRSF1_rep1
Chr9	135881632	135883078	135881794	135882815	-	36.2301	shSRSF1_rep1
Chr9	137564433	137565154	137564606	137564892	-	13.8019	shSRSF1_rep1
ChrX	101041316	101042312	101041371	101042232	-	6.03834	shSRSF1_rep1
Chr1	955922	957025	956013	956094	-	3.20133	shSRSF1_rep2
Chr1	955922	957273	957025	957098	-	1.06711	shSRSF1_rep2
Chr1	1256044	1257310	1257130	1257207	-	4.26843	shSRSF1_rep2
Chr1	1256991	1257310	1257130	1257207	-	9.60398	shSRSF1_rep2
Chr1	1262169	1263386	1262390	1263345	-	2.13422	shSRSF1_rep2
Chr1	1340037	1340503	1340177	1340246	-	1.06711	shSRSF1_rep2
Chr1	1477273	1490671	1477350	1478643	+	3.20133	shSRSF1_rep2
Chr1	1668326	1670151	1669736	1670097	-	3.20133	shSRSF1_rep2
Chr1	1668326	1671629	1670151	1671508	-	1.06711	shSRSF1_rep2
Chr1	1669663	1670151	1669736	1670097	-	2.13422	shSRSF1_rep2
Chr1	2055440	2059591	2055562	2056483	+	2.13422	shSRSF1_rep2
Chr1	3740232	3746186	3740387	3742803	-	1.06711	shSRSF1_rep2
Chr1	3783769	3785203	3784111	3785086	-	3.20133	shSRSF1_rep2
Chr1	10347760	10348733	10347827	10348648	+	4.26843	shSRSF1_rep2
Chr1	11073933	11074326	11074008	11074230	-	1.06711	shSRSF1_rep2
Chr1	11121245	11122126	11121368	11121978	-	1.06711	shSRSF1_rep2
Chr1	11947975	11949906	11948067	11949772	+	3.20133	shSRSF1_rep2
Chr1	15717892	15721388	15717992	15718537	+	1.06711	shSRSF1_rep2
Chr1	15872815	15876678	15873136	15876201	+	4.26843	shSRSF1_rep2
Chr1	16201781	16202574	16201861	16202415	-	2.13422	shSRSF1_rep2
Chr1	17022607	17024074	17022730	17023972	-	2.13422	shSRSF1_rep2
Chr1	20744743	20773610	20771073	20773450	-	1.06711	shSRSF1_rep2
Chr1	20749722	20773610	20749882	20757165	-	4.26843	shSRSF1_rep2
Chr1	20757165	20773610	20771073	20773450	-	2.13422	shSRSF1_rep2
Chr1	20770929	20773610	20771073	20773450	-	2.13422	shSRSF1_rep2
Chr1	25801042	25811879	25811535	25811690	+	1.06711	shSRSF1_rep2
Chr1	26941456	26941818	26941660	26941752	+	1.06711	shSRSF1_rep2
Chr1	26942659	26943065	26942776	26942870	+	18.1408	shSRSF1_rep2
Chr1	28560632	28561398	28560732	28561345	+	1.06711	shSRSF1_rep2
Chr1	32224033	32224475	32224121	32224409	+	16.0066	shSRSF1_rep2
Chr1	32226170	32226530	32226320	32226402	+	1.06711	shSRSF1_rep2
Chr1	32326938	32327677	32327077	32327535	+	11.7382	shSRSF1_rep2
Chr1	33294936	33295305	33295015	33295146	+	4.26843	shSRSF1_rep2
Chr1	35901947	35902337	35902070	35902203	+	1.06711	shSRSF1_rep2
Chr1	37582222	37583933	37582936	37583866	-	1.06711	shSRSF1_rep2
Chr1	37587310	37590845	37587495	37590705	-	1.06711	shSRSF1_rep2
Chr1	39529054	39548951	39529164	39541719	-	1.06711	shSRSF1_rep2
Chr1	44644697	44645081	44644794	44644994	+	1.06711	shSRSF1_rep2
Chr1	44757555	44758140	44757646	44757907	+	1.06711	shSRSF1_rep2
Chr1	45602254	45613248	45606591	45613168	+	1.06711	shSRSF1_rep2
Chr1	46279181	46298370	46279257	46279491	-	1.06711	shSRSF1_rep2
Chr1	46408458	46412251	46411651	46412142	+	3.20133	shSRSF1_rep2
Chr1	51750144	51765981	51750195	51756319	+	1.06711	shSRSF1_rep2
Chr1	51814034	51814813	51814609	51814692	-	3.20133	shSRSF1_rep2
Chr1	53787157	53789196	53787258	53789132	-	2.13422	shSRSF1_rep2
Chr1	53825797	53832591	53828173	53832489	-	2.13422	shSRSF1_rep2
Chr1	62443158	62447511	62443319	62444737	+	1.06711	shSRSF1_rep2
Chr1	109280776	109281251	109281046	109281136	-	1.06711	shSRSF1_rep2
Chr1	109409927	109415363	109410014	109411010	-	1.06711	shSRSF1_rep2
Chr1	145964728	145977851	145977539	145977777	+	1.06711	shSRSF1_rep2
Chr1	150498501	150499293	150498664	150498896	+	1.06711	shSRSF1_rep2
Chr1	155668626	155670464	155668717	155670319	-	1.06711	shSRSF1_rep2
Chr1	155670319	155675096	155672727	155675009	-	1.06711	shSRSF1_rep2
Chr1	155725381	155726019	155725490	155725926	+	25.6106	shSRSF1_rep2
Chr1	155926675	155927156	155926839	155927103	-	3.20133	shSRSF1_rep2
Chr1	156560933	156566546	156562001	156562586	-	2.13422	shSRSF1_rep2
Chr1	167772274	167776166	167773368	167776063	+	1.06711	shSRSF1_rep2
Chr1	173864674	173865282	173864704	173865228	-	1.06711	shSRSF1_rep2
Chr1	174219124	174231355	174219184	174220971	+	1.06711	shSRSF1_rep2
Chr1	179063926	179064496	179064098	179064304	+	5.33554	shSRSF1_rep2
Chr1	180175320	180178884	180176033	180178793	+	1.06711	shSRSF1_rep2
Chr1	181002605	181005463	181002700	181005293	-	2.13422	shSRSF1_rep2
Chr1	193028084	193029657	193029449	193029531	-	1.06711	shSRSF1_rep2
Chr1	205771471	205772567	205771653	205772495	-	1.06711	shSRSF1_rep2
Chr1	215575900	215586685	215577728	215578000	+	1.06711	shSRSF1_rep2
Chr1	224952669	224968874	224967583	224968758	+	3.20133	shSRSF1_rep2
Chr1	225038693	225043983	225038823	225042834	+	2.13422	shSRSF1_rep2
Chr1	226961376	226965737	226965410	226965670	+	3.20133	shSRSF1_rep2
Chr1	233217898	233227371	233217931	233218030	-	1.06711	shSRSF1_rep2
Chr1	235335241	235342883	235342346	235342835	+	4.26843	shSRSF1_rep2
Chr1	235341707	235342883	235342346	235342835	+	5.33554	shSRSF1_rep2
Chr1	236168705	236180028	236178636	236179878	+	3.20133	shSRSF1_rep2
Chr1	244843134	244848856	244847101	244848787	-	1.06711	shSRSF1_rep2
Chr10	3118781	3120044	3118869	3119891	+	3.20133	shSRSF1_rep2
Chr10	7243557	7285954	7284150	7285865	-	1.06711	shSRSF1_rep2
Chr10	7276891	7285954	7284150	7285865	-	8.53687	shSRSF1_rep2
Chr10	11997671	12014184	12004727	12014023	-	1.06711	shSRSF1_rep2
Chr10	27532506	27533994	27533853	27533927	+	16.0066	shSRSF1_rep2
Chr10	68394074	68394451	68394136	68394327	-	3.20133	shSRSF1_rep2
Chr10	68487143	68506718	68488629	68493131	-	2.13422	shSRSF1_rep2
Chr10	68722454	68757377	68755536	68757293	+	2.13422	shSRSF1_rep2
Chr10	68967017	68969121	68967203	68968975	+	2.13422	shSRSF1_rep2
Chr10	72340788	72341170	72340868	72340984	-	1.06711	shSRSF1_rep2
Chr10	72715110	72715902	72715226	72715853	+	2.13422	shSRSF1_rep2
Chr10	73529679	73530835	73529911	73530142	-	1.06711	shSRSF1_rep2
Chr10	73536268	73539593	73536437	73539443	-	1.06711	shSRSF1_rep2
Chr10	73571420	73576361	73575675	73576135	-	6.40265	shSRSF1_rep2
Chr10	73575511	73576361	73575675	73576135	-	11.7382	shSRSF1_rep2
Chr10	75219062	75219356	75219215	75219303	+	4.26843	shSRSF1_rep2
Chr10	77853353	77854370	77853537	77854226	-	10.6711	shSRSF1_rep2
Chr10	91994534	92008275	91997751	92008122	+	1.06711	shSRSF1_rep2
Chr10	91996368	91997751	91996570	91997602	+	2.13422	shSRSF1_rep2
Chr10	91996368	92008275	91997751	92008122	+	1.06711	shSRSF1_rep2
Chr10	92008828	92009208	92008950	92009040	+	3.20133	shSRSF1_rep2
Chr10	92632485	92637545	92637309	92637386	+	1.06711	shSRSF1_rep2
Chr10	92637183	92639900	92637309	92637386	+	2.13422	shSRSF1_rep2
Chr10	94588228	94608026	94601611	94607909	+	5.33554	shSRSF1_rep2
Chr10	97436416	97437750	97437275	97437699	-	6.40265	shSRSF1_rep2
Chr10	97437190	97437750	97437275	97437699	-	86.4358	shSRSF1_rep2
Chr10	97437190	97438703	97437275	97437699	-	5.33554	shSRSF1_rep2
Chr10	97743093	97744915	97743164	97744728	+	2.13422	shSRSF1_rep2
Chr10	100178132	100179247	100178194	100179200	-	3.20133	shSRSF1_rep2
Chr10	101790895	101791439	101791088	101791353	-	1.06711	shSRSF1_rep2
Chr10	101806044	101807901	101806143	101807729	-	2.13422	shSRSF1_rep2
Chr10	102157018	102158214	102157074	102157185	+	3.20133	shSRSF1_rep2
Chr10	102473569	102474012	102473741	102473818	+	2.13422	shSRSF1_rep2
Chr10	103417791	103427391	103425525	103427328	+	2.13422	shSRSF1_rep2
Chr10	103438014	103438808	103438071	103438685	+	32.0133	shSRSF1_rep2
Chr10	103439745	103440850	103440581	103440733	+	10.6711	shSRSF1_rep2
Chr10	103570871	103571822	103571113	103571500	+	4.26843	shSRSF1_rep2
Chr10	103570871	103585225	103571113	103571500	+	3.20133	shSRSF1_rep2
Chr10	103611580	103613190	103611630	103612852	-	2.13422	shSRSF1_rep2
Chr10	104018783	104019922	104018908	104019733	+	1.06711	shSRSF1_rep2
Chr10	110596397	110598290	110596550	110598138	+	14.9395	shSRSF1_rep2
Chr10	130169432	130171636	130169490	130171583	+	1.06711	shSRSF1_rep2
Chr10	131943967	131945459	131944145	131945294	+	1.06711	shSRSF1_rep2
Chr10	132209033	132228128	132222772	132222860	-	1.06711	shSRSF1_rep2
Chr11	473894	479152	473977	479084	+	1.06711	shSRSF1_rep2
Chr11	581491	582081	581606	581961	+	28.8119	shSRSF1_rep2
Chr11	581491	587464	581606	581961	+	10.6711	shSRSF1_rep2
Chr11	581491	592674	581606	581961	+	4.26843	shSRSF1_rep2
Chr11	581491	601701	581606	581961	+	3.20133	shSRSF1_rep2
Chr11	581491	605300	581606	581961	+	1.06711	shSRSF1_rep2
Chr11	1286001	1295794	1290409	1295644	-	2.13422	shSRSF1_rep2
Chr11	8137377	8140193	8138347	8139966	-	1.06711	shSRSF1_rep2
Chr11	9429673	9433846	9433636	9433720	+	1.06711	shSRSF1_rep2
Chr11	12862249	12864900	12862314	12864837	+	2.13422	shSRSF1_rep2
Chr11	32588593	32589135	32588732	32589011	+	1.06711	shSRSF1_rep2
Chr11	34071725	34076642	34076474	34076559	+	7.46976	shSRSF1_rep2
Chr11	34154264	34154769	34154378	34154700	-	1.06711	shSRSF1_rep2
Chr11	46433473	46435037	46433628	46434848	-	2.13422	shSRSF1_rep2
Chr11	47295495	47296055	47295579	47295896	+	1.06711	shSRSF1_rep2
Chr11	47625673	47627127	47625741	47627079	-	26.6777	shSRSF1_rep2
Chr11	47731373	47736740	47731561	47732536	-	2.13422	shSRSF1_rep2
Chr11	47818055	47819458	47818124	47819373	-	1.06711	shSRSF1_rep2
Chr11	57692610	57696043	57692702	57693782	+	1.06711	shSRSF1_rep2
Chr11	60931685	60932127	60931884	60931983	+	1.06711	shSRSF1_rep2
Chr11	61334619	61345946	61345745	61345856	+	1.06711	shSRSF1_rep2
Chr11	61366044	61367998	61366216	61367922	+	5.33554	shSRSF1_rep2
Chr11	62535944	62536567	62536098	62536238	-	1.06711	shSRSF1_rep2
Chr11	62638982	62639731	62639467	62639626	-	6.40265	shSRSF1_rep2
Chr11	62781893	62782825	62782333	62782692	+	6.40265	shSRSF1_rep2
Chr11	62839113	62839659	62839235	62839321	-	3.20133	shSRSF1_rep2
Chr11	63651935	63652575	63651986	63652470	-	3.20133	shSRSF1_rep2
Chr11	63895158	63895633	63895338	63895579	+	9.60398	shSRSF1_rep2
Chr11	65393572	65394425	65393674	65394040	+	12.8053	shSRSF1_rep2
Chr11	66599115	66599636	66599253	66599458	+	3.20133	shSRSF1_rep2
Chr11	67393495	67393790	67393610	67393690	+	4.26843	shSRSF1_rep2
Chr11	67608551	67609635	67608722	67609451	+	1.06711	shSRSF1_rep2
Chr11	70405264	70407591	70405361	70407297	+	2.13422	shSRSF1_rep2
Chr11	74203727	74204445	74203821	74204352	+	24.5435	shSRSF1_rep2
Chr11	77622499	77625818	77622673	77624962	-	2.13422	shSRSF1_rep2
Chr11	77624962	77625818	77625070	77625716	-	8.53687	shSRSF1_rep2
Chr11	83198478	83211430	83210419	83211294	+	2.13422	shSRSF1_rep2
Chr11	85981744	85982003	85981775	85981871	-	6.40265	shSRSF1_rep2
Chr11	86255221	86256512	86255287	86256386	+	1.06711	shSRSF1_rep2
Chr11	116863667	116873636	116863818	116870330	-	1.06711	shSRSF1_rep2
Chr11	120474559	120477526	120474635	120475339	+	4.26843	shSRSF1_rep2
Chr11	126272968	126273454	126273079	126273315	+	2.13422	shSRSF1_rep2
Chr11	129123445	129124894	129123929	129124802	-	2.13422	shSRSF1_rep2
Chr11	129123445	129164427	129123929	129124802	-	4.26843	shSRSF1_rep2
Chr12	433173	433472	433322	433406	+	2.13422	shSRSF1_rep2
Chr12	813641	830160	827262	830002	+	2.13422	shSRSF1_rep2
Chr12	2820085	2821792	2820225	2820723	+	1.06711	shSRSF1_rep2
Chr12	6563314	6563946	6563514	6563613	-	2.13422	shSRSF1_rep2
Chr12	6730401	6730820	6730507	6730668	+	1.06711	shSRSF1_rep2
Chr12	10718087	10719143	10718121	10719079	-	1.06711	shSRSF1_rep2
Chr12	28225794	28259442	28255662	28257201	+	3.20133	shSRSF1_rep2
Chr12	28255580	28259442	28255662	28257201	+	17.0737	shSRSF1_rep2
Chr12	32598496	32601334	32598586	32601277	+	3.20133	shSRSF1_rep2
Chr12	42210354	42210619	42210454	42210547	-	1.06711	shSRSF1_rep2
Chr12	42210354	42210680	42210454	42210547	-	7.46976	shSRSF1_rep2
Chr12	48833276	48834497	48833519	48834319	-	2.13422	shSRSF1_rep2
Chr12	49097565	49098105	49097739	49097943	-	1.06711	shSRSF1_rep2
Chr12	49486249	49490731	49489573	49490681	+	3.20133	shSRSF1_rep2
Chr12	49489464	49490731	49489573	49490681	+	6.40265	shSRSF1_rep2
Chr12	49991997	49992655	49992377	49992549	-	3.20133	shSRSF1_rep2
Chr12	52010880	52013943	52013780	52013876	+	4.26843	shSRSF1_rep2
Chr12	52010880	52014201	52013780	52013876	+	1.06711	shSRSF1_rep2
Chr12	53027781	53028188	53027919	53028014	+	2.13422	shSRSF1_rep2
Chr12	56109229	56109935	56109293	56109856	+	1.06711	shSRSF1_rep2
Chr12	56275995	56282991	56276143	56282419	-	2.13422	shSRSF1_rep2
Chr12	56348528	56349636	56349509	56349588	-	1.06711	shSRSF1_rep2
Chr12	56433025	56434231	56433926	56434073	-	1.06711	shSRSF1_rep2
Chr12	56670274	56673065	56672809	56672951	-	2.13422	shSRSF1_rep2
Chr12	57498156	57498623	57498273	57498419	+	1.06711	shSRSF1_rep2
Chr12	57533952	57534452	57534097	57534291	-	1.06711	shSRSF1_rep2
Chr12	57572060	57572726	57572267	57572579	+	3.20133	shSRSF1_rep2
Chr12	68828770	68836749	68835984	68836671	+	1.06711	shSRSF1_rep2
Chr12	68835828	68839801	68835843	68836671	+	2.13422	shSRSF1_rep2
Chr12	69251128	69262562	69260197	69262372	+	14.9395	shSRSF1_rep2
Chr12	69800208	69801721	69800337	69801608	+	4.26843	shSRSF1_rep2
Chr12	70278131	70311017	70285586	70294236	+	2.13422	shSRSF1_rep2
Chr12	101333300	101334504	101333444	101334424	+	1.06711	shSRSF1_rep2
Chr12	104309758	104311412	104309950	104311289	+	2.13422	shSRSF1_rep2
Chr12	106051276	106052175	106051381	106051968	-	1.06711	shSRSF1_rep2
Chr12	108652271	108654410	108652417	108653037	-	5.33554	shSRSF1_rep2
Chr12	109907525	109908937	109907699	109908585	+	1.06711	shSRSF1_rep2
Chr12	110292019	110296737	110292124	110296598	+	3.20133	shSRSF1_rep2
Chr12	111554157	111555919	111554217	111555882	-	3.20133	shSRSF1_rep2
Chr12	112075677	112078741	112078266	112078633	-	5.33554	shSRSF1_rep2
Chr12	112078187	112078741	112078266	112078633	-	4.26843	shSRSF1_rep2
Chr12	112203635	112204623	112203772	112204485	-	2.13422	shSRSF1_rep2
Chr12	113267842	113269845	113267956	113268741	+	1.06711	shSRSF1_rep2
Chr12	116230432	116237705	116236890	116237467	-	7.46976	shSRSF1_rep2
Chr12	116230532	116237705	116236890	116237467	-	1.06711	shSRSF1_rep2
Chr12	116236820	116237705	116236890	116237467	-	6.40265	shSRSF1_rep2
Chr12	118019071	118020985	118019136	118019631	+	2.13422	shSRSF1_rep2
Chr12	120142506	120142941	120142722	120142823	-	6.40265	shSRSF1_rep2
Chr12	120154969	120155719	120155430	120155591	-	115.248	shSRSF1_rep2
Chr12	120177446	120178950	120178759	120178851	-	4.26843	shSRSF1_rep2
Chr12	120557281	120557682	120557466	120557545	+	6.40265	shSRSF1_rep2
Chr12	120562944	120563943	120563623	120563809	+	1.06711	shSRSF1_rep2
Chr12	121780871	121781192	121781006	121781082	-	1.06711	shSRSF1_rep2
Chr12	123616510	123618837	123617872	123618668	+	1.06711	shSRSF1_rep2
Chr12	124782682	124787457	124782811	124786440	-	1.06711	shSRSF1_rep2
Chr12	124952397	124954211	124953996	124954086	-	7.46976	shSRSF1_rep2
Chr12	128809395	128810053	128809473	128809942	-	1.06711	shSRSF1_rep2
Chr12	131908643	131908971	131908817	131908897	+	3.20133	shSRSF1_rep2
Chr12	132508152	132527988	132525823	132527952	+	1.06711	shSRSF1_rep2
Chr12	132525733	132527988	132525823	132527952	+	5.33554	shSRSF1_rep2
Chr12	132525733	132548032	132525823	132527952	+	16.0066	shSRSF1_rep2
Chr12	132668355	132668939	132668737	132668810	-	2.13422	shSRSF1_rep2
Chr12	132680177	132680687	132680222	132680606	-	3.20133	shSRSF1_rep2
Chr12	132734384	132735512	132734575	132735405	-	16.0066	shSRSF1_rep2
Chr12	132780797	132784307	132782493	132784163	-	1.06711	shSRSF1_rep2
Chr12	132782295	132784307	132782493	132784163	-	2.13422	shSRSF1_rep2
Chr12	132851617	132853573	132851737	132853430	-	1.06711	shSRSF1_rep2
Chr12	133047954	133048848	133048081	133048752	+	1.06711	shSRSF1_rep2
Chr13	18218998	18222581	18219550	18222494	+	1.06711	shSRSF1_rep2
Chr13	19851354	19852190	19851448	19851688	-	4.26843	shSRSF1_rep2
Chr13	19993062	19993919	19993564	19993825	+	2.13422	shSRSF1_rep2
Chr13	30227411	30241086	30240565	30240958	-	2.13422	shSRSF1_rep2
Chr13	39687502	39689824	39687631	39687707	+	3.20133	shSRSF1_rep2
Chr13	49927918	49931134	49928085	49931017	-	1.06711	shSRSF1_rep2
Chr14	20403376	20406400	20403448	20403722	-	3.20133	shSRSF1_rep2
Chr14	20992123	20992622	20992205	20992540	+	1.06711	shSRSF1_rep2
Chr14	21503172	21503881	21503577	21503663	-	6.40265	shSRSF1_rep2
Chr14	22926132	22926814	22926296	22926505	-	5.33554	shSRSF1_rep2
Chr14	22947170	22950410	22947239	22947600	-	1.06711	shSRSF1_rep2
Chr14	39276933	39279537	39277065	39279336	+	3.20133	shSRSF1_rep2
Chr14	49664625	49665163	49664674	49665106	-	3.20133	shSRSF1_rep2
Chr14	55648024	55648870	55648115	55648801	+	2.13422	shSRSF1_rep2
Chr14	58219693	58223856	58223701	58223782	+	1.06711	shSRSF1_rep2
Chr14	61721508	61721823	61721654	61721738	+	19.208	shSRSF1_rep2
Chr14	73147794	73148094	73147876	73147966	+	1.06711	shSRSF1_rep2
Chr14	73147794	73148106	73147876	73147966	+	2.13422	shSRSF1_rep2
Chr14	73244643	73246175	73245696	73246072	+	4.26843	shSRSF1_rep2
Chr14	73858815	73881292	73879305	73880054	+	1.06711	shSRSF1_rep2
Chr14	92093251	92096838	92096137	92096673	-	1.06711	shSRSF1_rep2
Chr14	96560648	96562893	96560711	96562818	+	1.06711	shSRSF1_rep2
Chr14	102040235	102040673	102040410	102040597	+	36.2817	shSRSF1_rep2
Chr14	103498501	103500200	103498528	103500155	+	1.06711	shSRSF1_rep2
Chr14	105212112	105226760	105221914	105226068	-	1.06711	shSRSF1_rep2
Chr15	25405460	25415842	25407212	25408619	-	4.26843	shSRSF1_rep2
Chr15	28265617	28280287	28274447	28274904	-	1.06711	shSRSF1_rep2
Chr15	40389165	40389929	40389291	40389505	+	2.13422	shSRSF1_rep2
Chr15	40407938	40415482	40407990	40410627	+	1.06711	shSRSF1_rep2
Chr15	41356038	41375828	41371684	41375711	+	2.13422	shSRSF1_rep2
Chr15	42634855	42638812	42638087	42638699	+	4.26843	shSRSF1_rep2
Chr15	42637906	42638812	42638087	42638699	+	1.06711	shSRSF1_rep2
Chr15	50300788	50301368	50300902	50301220	-	1.06711	shSRSF1_rep2
Chr15	65534348	65535834	65534434	65535720	+	1.06711	shSRSF1_rep2
Chr15	65551675	65558731	65554960	65556738	+	4.26843	shSRSF1_rep2
Chr15	69421646	69422435	69422128	69422325	+	5.33554	shSRSF1_rep2
Chr15	69436137	69436722	69436261	69436563	+	3.20133	shSRSF1_rep2
Chr15	72355558	72356617	72355624	72356524	-	2.13422	shSRSF1_rep2
Chr15	74572861	74573204	74572933	74573131	+	13.8724	shSRSF1_rep2
Chr15	77283882	77365225	77284030	77284957	-	2.13422	shSRSF1_rep2
Chr15	84838979	84840932	84839097	84839701	+	1.06711	shSRSF1_rep2
Chr15	85113872	85115487	85114037	85115438	+	8.53687	shSRSF1_rep2
Chr15	89386788	89387881	89387538	89387816	+	3.20133	shSRSF1_rep2
Chr15	89387816	89389482	89388581	89389344	+	1.06711	shSRSF1_rep2
Chr15	89888520	89889140	89888632	89889048	-	5.33554	shSRSF1_rep2
Chr15	90230933	90231213	90231022	90231094	-	1.06711	shSRSF1_rep2
Chr15	90980883	90981981	90981669	90981747	-	1.06711	shSRSF1_rep2
Chr15	92978233	92979283	92978383	92979134	+	3.20133	shSRSF1_rep2
Chr15	93014695	93014909	93014726	93014815	+	1.06711	shSRSF1_rep2
Chr15	100564691	100565265	100564785	100565194	-	2.13422	shSRSF1_rep2
Chr15	101427891	101432100	101430063	101431319	-	1.06711	shSRSF1_rep2
Chr16	117300	125073	123545	124936	-	1.06711	shSRSF1_rep2
Chr16	297055	298251	297226	297721	-	3.20133	shSRSF1_rep2
Chr16	533945	536142	533998	536028	+	43.7515	shSRSF1_rep2
Chr16	671859	672181	672002	672083	+	2.13422	shSRSF1_rep2
Chr16	1724556	1729578	1729208	1729486	+	2.13422	shSRSF1_rep2
Chr16	1729137	1729578	1729208	1729486	+	4.26843	shSRSF1_rep2
Chr16	3675323	3689137	3679790	3685995	-	1.06711	shSRSF1_rep2
Chr16	3685995	3690985	3689137	3690826	-	1.06711	shSRSF1_rep2
Chr16	4332214	4333519	4332452	4333346	+	2.13422	shSRSF1_rep2
Chr16	4700969	4724831	4701134	4701433	-	1.06711	shSRSF1_rep2
Chr16	5027134	5028185	5027198	5027277	-	3.20133	shSRSF1_rep2
Chr16	5079747	5081056	5079807	5080945	+	2.13422	shSRSF1_rep2
Chr16	8858349	8859335	8858472	8859170	-	1.06711	shSRSF1_rep2
Chr16	11894953	11896785	11894987	11896557	-	5.33554	shSRSF1_rep2
Chr16	11894953	11898035	11894987	11896557	-	1.06711	shSRSF1_rep2
Chr16	14627105	14627336	14627187	14627268	-	5.33554	shSRSF1_rep2
Chr16	24968350	24970580	24968427	24968660	-	6.40265	shSRSF1_rep2
Chr16	30083393	30083781	30083567	30083654	+	1.06711	shSRSF1_rep2
Chr16	30116635	30118444	30118163	30118348	-	2.13422	shSRSF1_rep2
Chr16	31297513	31297954	31297654	31297741	+	8.53687	shSRSF1_rep2
Chr16	31722625	31723353	31722752	31723257	+	6.40265	shSRSF1_rep2
Chr16	58675939	58676346	58676054	58676288	-	12.8053	shSRSF1_rep2
Chr16	67727326	67738035	67731584	67734857	-	1.06711	shSRSF1_rep2
Chr16	68053563	68054617	68053655	68054573	+	2.13422	shSRSF1_rep2
Chr16	70253267	70253800	70253381	70253713	-	2.13422	shSRSF1_rep2
Chr16	70463168	70463774	70463272	70463622	+	3.20133	shSRSF1_rep2
Chr16	70463168	70465176	70463272	70463622	+	1.06711	shSRSF1_rep2
Chr16	71920738	71921453	71920822	71921342	+	1.06711	shSRSF1_rep2
Chr16	77194934	77195682	77195154	77195534	+	1.06711	shSRSF1_rep2
Chr16	84762988	84775225	84763088	84764085	+	2.13422	shSRSF1_rep2
Chr16	88737558	88742422	88737646	88737727	-	3.20133	shSRSF1_rep2
Chr16	89223156	89224802	89223283	89224718	+	3.20133	shSRSF1_rep2
Chr16	89733301	89734038	89733557	89733920	+	1.06711	shSRSF1_rep2
Chr16	89740803	89748767	89742938	89744958	-	1.06711	shSRSF1_rep2
Chr16	89782858	89783102	89782918	89783006	-	6.40265	shSRSF1_rep2
Chr16	89791402	89792547	89791536	89791926	-	1.06711	shSRSF1_rep2
Chr16	89883350	89900794	89898872	89900634	+	1.06711	shSRSF1_rep2
Chr16	89895037	89900794	89898872	89900634	+	2.13422	shSRSF1_rep2
Chr16	89895989	89900794	89898872	89900634	+	1.06711	shSRSF1_rep2
Chr16	89977677	89978878	89977802	89978809	+	3.20133	shSRSF1_rep2
Chr16	89977714	89978878	89977802	89978809	+	2.13422	shSRSF1_rep2
Chr16	89978809	89980336	89978878	89980241	+	2.13422	shSRSF1_rep2
Chr16	89980241	89992828	89980336	89981772	+	1.06711	shSRSF1_rep2
Chr17	1361091	1362008	1361298	1361901	-	1.06711	shSRSF1_rep2
Chr17	1467479	1468496	1468123	1468252	-	1.06711	shSRSF1_rep2
Chr17	1497935	1507089	1498122	1506979	-	1.06711	shSRSF1_rep2
Chr17	1636708	1637062	1636855	1636940	-	3.20133	shSRSF1_rep2
Chr17	4206320	4217118	4209947	4216982	-	2.13422	shSRSF1_rep2
Chr17	5425970	5426299	5426082	5426235	+	3.20133	shSRSF1_rep2
Chr17	5460938	5462546	5461109	5462318	-	11.7382	shSRSF1_rep2
Chr17	5481100	5482882	5481389	5482808	-	1.06711	shSRSF1_rep2
Chr17	13000155	13005979	13005825	13005920	-	3.20133	shSRSF1_rep2
Chr17	14033551	14034416	14033661	14034007	-	5.33554	shSRSF1_rep2
Chr17	16299887	16317908	16316712	16317774	+	2.13422	shSRSF1_rep2
Chr17	18305111	18306966	18305220	18306890	-	1.06711	shSRSF1_rep2
Chr17	18340042	18340813	18340255	18340731	-	4.26843	shSRSF1_rep2
Chr17	19560187	19560493	19560296	19560417	+	1.06711	shSRSF1_rep2
Chr17	28681881	28683816	28683092	28683267	+	1.06711	shSRSF1_rep2
Chr17	32173830	32175362	32173912	32175318	+	7.46976	shSRSF1_rep2
Chr17	35820023	35820437	35820248	35820331	+	2.13422	shSRSF1_rep2
Chr17	36509061	36511455	36510917	36511364	-	12.8053	shSRSF1_rep2
Chr17	39708320	39710481	39710201	39710339	+	5.33554	shSRSF1_rep2
Chr17	41818088	41818527	41818278	41818381	+	1.06711	shSRSF1_rep2
Chr17	42322281	42323625	42323354	42323572	-	1.06711	shSRSF1_rep2
Chr17	43816037	43818110	43816079	43816676	-	3.20133	shSRSF1_rep2
Chr17	43816037	43825841	43816079	43816676	-	3.20133	shSRSF1_rep2
Chr17	44154555	44155411	44154664	44154852	+	1.06711	shSRSF1_rep2
Chr17	45120324	45121372	45121130	45121210	-	10.6711	shSRSF1_rep2
Chr17	46169530	46172232	46169605	46170854	-	5.33554	shSRSF1_rep2
Chr17	47618349	47619784	47619164	47619736	+	1.06711	shSRSF1_rep2
Chr17	48112030	48113401	48112111	48112573	+	6.40265	shSRSF1_rep2
Chr17	49025617	49026517	49025666	49026465	+	6.40265	shSRSF1_rep2
Chr17	50736959	50741731	50741246	50741656	+	1.06711	shSRSF1_rep2
Chr17	50741101	50741731	50741246	50741656	+	3.20133	shSRSF1_rep2
Chr17	51041500	51056482	51041651	51047374	-	1.06711	shSRSF1_rep2
Chr17	62664547	62667533	62666870	62667389	+	3.20133	shSRSF1_rep2
Chr17	75215753	75218306	75215823	75218184	+	1.06711	shSRSF1_rep2
Chr17	75242335	75243570	75243166	75243446	-	2.13422	shSRSF1_rep2
Chr17	75812111	75813878	75812288	75812454	+	1.06711	shSRSF1_rep2
Chr17	75917731	75918269	75917850	75917930	-	2.13422	shSRSF1_rep2
Chr17	76312869	76313891	76313016	76313820	-	43.7515	shSRSF1_rep2
Chr17	76487711	76488132	76487851	76487973	-	1.06711	shSRSF1_rep2
Chr17	78202498	78202751	78202603	78202702	+	1.06711	shSRSF1_rep2
Chr17	79077429	79077864	79077497	79077662	+	1.06711	shSRSF1_rep2
Chr17	80049905	80050283	80049989	80050063	+	2.13422	shSRSF1_rep2
Chr17	80883418	80940601	80883484	80883780	+	1.06711	shSRSF1_rep2
Chr17	81053667	81057967	81053791	81057880	+	3.20133	shSRSF1_rep2
Chr17	81275968	81277133	81276151	81277030	-	1.06711	shSRSF1_rep2
Chr17	82563353	82568201	82563548	82568053	+	3.20133	shSRSF1_rep2
Chr17	82563353	82571870	82563548	82568053	+	2.13422	shSRSF1_rep2
Chr17	82763964	82814934	82807668	82809707	+	2.13422	shSRSF1_rep2
Chr17	82900650	82911789	82908437	82909284	+	2.13422	shSRSF1_rep2
Chr17	83035034	83048785	83048570	83048668	-	1.06711	shSRSF1_rep2
Chr18	683245	688608	686008	688573	-	1.06711	shSRSF1_rep2
Chr18	693881	694334	693908	694247	-	11.7382	shSRSF1_rep2
Chr18	9931809	9937066	9936213	9936985	+	9.60398	shSRSF1_rep2
Chr18	9936109	9937066	9936213	9936985	+	1.06711	shSRSF1_rep2
Chr18	10532710	10533553	10532795	10533535	+	3.20133	shSRSF1_rep2
Chr18	12420324	12421629	12420493	12421539	+	5.33554	shSRSF1_rep2
Chr18	12421539	12427323	12427111	12427220	+	2.13422	shSRSF1_rep2
Chr18	23370215	23371470	23370261	23371421	-	2.13422	shSRSF1_rep2
Chr18	79448781	79451816	79451126	79451675	+	1.06711	shSRSF1_rep2
Chr18	79450953	79451816	79451126	79451675	+	1.06711	shSRSF1_rep2
Chr18	79728906	79736521	79729069	79736354	+	1.06711	shSRSF1_rep2
Chr19	311844	313643	311939	312190	-	3.20133	shSRSF1_rep2
Chr19	325634	336173	326598	327132	-	4.26843	shSRSF1_rep2
Chr19	326506	334542	326598	327132	-	1.06711	shSRSF1_rep2
Chr19	1036129	1036562	1036246	1036415	+	1.06711	shSRSF1_rep2
Chr19	1218416	1219413	1218500	1219323	+	10.6711	shSRSF1_rep2
Chr19	1218416	1223172	1222006	1222984	+	2.13422	shSRSF1_rep2
Chr19	1646354	1650287	1646427	1650176	-	1.06711	shSRSF1_rep2
Chr19	2137010	2138714	2137807	2138618	-	2.13422	shSRSF1_rep2
Chr19	2137726	2138714	2137807	2138618	-	22.4093	shSRSF1_rep2
Chr19	2213538	2214596	2213640	2213848	+	5.33554	shSRSF1_rep2
Chr19	2271384	2271954	2271530	2271781	+	2.13422	shSRSF1_rep2
Chr19	2271390	2272820	2271530	2271781	+	3.20133	shSRSF1_rep2
Chr19	2339823	2343292	2339966	2340075	+	1.06711	shSRSF1_rep2
Chr19	2761459	2763757	2762644	2763652	-	2.13422	shSRSF1_rep2
Chr19	2765185	2769091	2767686	2768968	-	1.06711	shSRSF1_rep2
Chr19	3192469	3196277	3193428	3196182	+	2.13422	shSRSF1_rep2
Chr19	3660965	3662001	3661083	3661870	-	6.40265	shSRSF1_rep2
Chr19	4354948	4355173	4355021	4355096	+	4.26843	shSRSF1_rep2
Chr19	4941527	4941931	4941628	4941744	+	30.9462	shSRSF1_rep2
Chr19	5604582	5604936	5604695	5604786	-	4.26843	shSRSF1_rep2
Chr19	5641593	5641946	5641658	5641739	+	1.06711	shSRSF1_rep2
Chr19	5653114	5653420	5653264	5653337	+	1.06711	shSRSF1_rep2
Chr19	7542560	7557284	7542670	7542760	+	2.13422	shSRSF1_rep2
Chr19	9617044	9618179	9617171	9617620	-	2.13422	shSRSF1_rep2
Chr19	9658008	9659467	9658135	9659378	-	1.06711	shSRSF1_rep2
Chr19	9992826	9993806	9993672	9993752	-	1.06711	shSRSF1_rep2
Chr19	10151397	10156509	10151545	10151749	-	1.06711	shSRSF1_rep2
Chr19	10154292	10155056	10154773	10154904	-	4.26843	shSRSF1_rep2
Chr19	10258221	10258685	10258522	10258608	+	7.46976	shSRSF1_rep2
Chr19	10356567	10358138	10356718	10357763	-	2.13422	shSRSF1_rep2
Chr19	10559358	10559708	10559529	10559612	-	1.06711	shSRSF1_rep2
Chr19	10701949	10713040	10702018	10702115	+	2.13422	shSRSF1_rep2
Chr19	10707301	10713040	10712867	10712952	+	3.20133	shSRSF1_rep2
Chr19	10795371	10798572	10795439	10796060	+	3.20133	shSRSF1_rep2
Chr19	10795371	10802358	10795439	10796060	+	1.06711	shSRSF1_rep2
Chr19	10904950	10909207	10908668	10909102	+	1.06711	shSRSF1_rep2
Chr19	11003028	11003397	11003159	11003339	+	2.13422	shSRSF1_rep2
Chr19	12672846	12673316	12673116	12673201	+	5.33554	shSRSF1_rep2
Chr19	12679456	12680325	12679719	12679800	-	4.26843	shSRSF1_rep2
Chr19	12714820	12715739	12714939	12715046	-	3.20133	shSRSF1_rep2
Chr19	12715046	12715739	12715169	12715242	-	3.20133	shSRSF1_rep2
Chr19	12928341	12928847	12928457	12928534	-	37.3488	shSRSF1_rep2
Chr19	12948513	12949333	12948813	12949080	+	1.06711	shSRSF1_rep2
Chr19	13927892	13928188	13928030	13928123	+	6.40265	shSRSF1_rep2
Chr19	14463666	14464153	14463969	14464059	+	1.06711	shSRSF1_rep2
Chr19	14479411	14480778	14480485	14480592	-	2.13422	shSRSF1_rep2
Chr19	15374602	15377014	15374635	15376975	-	2.13422	shSRSF1_rep2
Chr19	17162349	17163122	17162466	17162987	+	1.06711	shSRSF1_rep2
Chr19	17276494	17276909	17276624	17276822	+	51.2212	shSRSF1_rep2
Chr19	18537600	18538433	18537773	18538215	-	6.40265	shSRSF1_rep2
Chr19	18537600	18538436	18537773	18538215	-	26.6777	shSRSF1_rep2
Chr19	18539370	18539720	18539459	18539550	-	9.60398	shSRSF1_rep2
Chr19	19104912	19106385	19104938	19105560	+	1.06711	shSRSF1_rep2
Chr19	19198106	19199234	19198232	19198656	+	6.40265	shSRSF1_rep2
Chr19	19335717	19336187	19335735	19336121	+	2.13422	shSRSF1_rep2
Chr19	19337169	19338939	19337265	19338844	+	3.20133	shSRSF1_rep2
Chr19	19640084	19640571	19640360	19640445	-	2.13422	shSRSF1_rep2
Chr19	33021570	33026632	33021646	33026503	-	2.13422	shSRSF1_rep2
Chr19	34443843	34445121	34443911	34444999	+	3.20133	shSRSF1_rep2
Chr19	35615041	35615386	35615147	35615226	+	1.06711	shSRSF1_rep2
Chr19	36092688	36094164	36092811	36094030	+	2.13422	shSRSF1_rep2
Chr19	36917578	36937242	36917648	36922585	+	1.06711	shSRSF1_rep2
Chr19	39417554	39418105	39417692	39417904	+	1.06711	shSRSF1_rep2
Chr19	39457674	39459960	39457740	39458293	+	2.13422	shSRSF1_rep2
Chr19	40237968	40240110	40238973	40240044	-	6.40265	shSRSF1_rep2
Chr19	40583397	40583717	40583485	40583600	+	1.06711	shSRSF1_rep2
Chr19	40705095	40705447	40705181	40705324	-	2.13422	shSRSF1_rep2
Chr19	41389764	41391962	41389905	41391840	-	1.06711	shSRSF1_rep2
Chr19	41410636	41411009	41410816	41410922	+	1.06711	shSRSF1_rep2
Chr19	41410636	41423169	41410816	41410922	+	1.06711	shSRSF1_rep2
Chr19	44442562	44447600	44442621	44442813	-	2.13422	shSRSF1_rep2
Chr19	45056449	45060627	45060467	45060553	+	1.06711	shSRSF1_rep2
Chr19	45138513	45142458	45142211	45142302	+	2.13422	shSRSF1_rep2
Chr19	45263112	45263367	45263166	45263318	+	34.1475	shSRSF1_rep2
Chr19	45263112	45271708	45263166	45263318	+	3.20133	shSRSF1_rep2
Chr19	45419097	45421393	45419197	45420323	-	1.06711	shSRSF1_rep2
Chr19	47264602	47264946	47264686	47264772	+	17.0737	shSRSF1_rep2
Chr19	47416651	47417350	47416702	47416803	-	3.20133	shSRSF1_rep2
Chr19	48127276	48128020	48127348	48127909	-	9.60398	shSRSF1_rep2
Chr19	48143542	48143963	48143599	48143882	-	1.06711	shSRSF1_rep2
Chr19	48845369	48845616	48845446	48845516	-	1.06711	shSRSF1_rep2
Chr19	49686092	49686726	49686243	49686604	+	1.06711	shSRSF1_rep2
Chr19	49828448	49829090	49828547	49828969	+	3.20133	shSRSF1_rep2
Chr19	49861771	49862105	49861881	49862043	-	2.13422	shSRSF1_rep2
Chr19	49980954	49989771	49988492	49989638	-	2.13422	shSRSF1_rep2
Chr19	50398847	50399484	50399053	50399370	+	2.13422	shSRSF1_rep2
Chr19	50398850	50399484	50399053	50399370	+	5.33554	shSRSF1_rep2
Chr19	50413425	50413879	50413521	50413741	+	2.13422	shSRSF1_rep2
Chr19	54183520	54187287	54183680	54187160	-	2.13422	shSRSF1_rep2
Chr19	55098783	55103568	55098858	55098950	-	1.06711	shSRSF1_rep2
Chr19	55245119	55245678	55245185	55245264	-	12.8053	shSRSF1_rep2
Chr19	55649204	55649584	55649309	55649407	+	1.06711	shSRSF1_rep2
Chr19	56146246	56147208	56146420	56146889	+	2.13422	shSRSF1_rep2
Chr19	58392975	58393487	58393185	58393358	+	7.46976	shSRSF1_rep2
Chr2	27382125	27387158	27384092	27384672	-	1.06711	shSRSF1_rep2
Chr2	27631026	27632670	27631900	27632632	+	1.06711	shSRSF1_rep2
Chr2	28946449	28947161	28946499	28946599	+	5.33554	shSRSF1_rep2
Chr2	37289355	37290999	37289513	37290867	-	1.06711	shSRSF1_rep2
Chr2	38746143	38746747	38746179	38746693	-	1.06711	shSRSF1_rep2
Chr2	39336919	39337581	39336967	39337525	-	5.33554	shSRSF1_rep2
Chr2	44704282	44715353	44704343	44706286	+	1.06711	shSRSF1_rep2
Chr2	53750782	53765585	53750941	53765376	-	2.13422	shSRSF1_rep2
Chr2	61488164	61490776	61488771	61490641	-	2.13422	shSRSF1_rep2
Chr2	61522610	61526521	61525333	61525491	-	6.40265	shSRSF1_rep2
Chr2	63856305	63857936	63856433	63856787	+	1.06711	shSRSF1_rep2
Chr2	70051202	70085624	70051305	70085546	-	1.06711	shSRSF1_rep2
Chr2	73239642	73240543	73239796	73240436	+	1.06711	shSRSF1_rep2
Chr2	74427168	74427592	74427273	74427423	-	2.13422	shSRSF1_rep2
Chr2	85368685	85369830	85368754	85369738	+	7.46976	shSRSF1_rep2
Chr2	85644947	85645899	85645083	85645813	+	1.06711	shSRSF1_rep2
Chr2	96129823	96130145	96129978	96130063	-	3.20133	shSRSF1_rep2
Chr2	96828098	96828700	96828195	96828566	+	1.06711	shSRSF1_rep2
Chr2	97657151	97659477	97658643	97658878	-	3.20133	shSRSF1_rep2
Chr2	99462495	99464985	99462622	99464921	-	2.13422	shSRSF1_rep2
Chr2	100964057	100965766	100964943	100965659	+	1.06711	shSRSF1_rep2
Chr2	101294013	101295181	101294082	101294930	-	3.20133	shSRSF1_rep2
Chr2	105342847	105343223	105342974	105343100	+	2.13422	shSRSF1_rep2
Chr2	106158057	106166083	106163710	106164735	-	10.6711	shSRSF1_rep2
Chr2	127335869	127343194	127337778	127338931	-	1.06711	shSRSF1_rep2
Chr2	128164729	128171284	128170390	128171204	+	4.26843	shSRSF1_rep2
Chr2	128170287	128171284	128170390	128171204	+	1.06711	shSRSF1_rep2
Chr2	130358866	130359646	130359492	130359607	+	1.06711	shSRSF1_rep2
Chr2	135126180	135126656	135126249	135126582	+	2.13422	shSRSF1_rep2
Chr2	152657888	152659356	152659189	152659269	-	1.06711	shSRSF1_rep2
Chr2	178535731	178542361	178539890	178540106	+	2.13422	shSRSF1_rep2
Chr2	182994838	182995838	182994887	182995700	-	1.06711	shSRSF1_rep2
Chr2	183178806	183179411	183178907	183179225	+	1.06711	shSRSF1_rep2
Chr2	190953564	190954818	190954660	190954754	+	1.06711	shSRSF1_rep2
Chr2	200856681	200856985	200856811	200856890	-	5.33554	shSRSF1_rep2
Chr2	200856681	200858089	200856811	200856890	-	1.06711	shSRSF1_rep2
Chr2	202892616	202896219	202894626	202896064	-	1.06711	shSRSF1_rep2
Chr2	218737578	218740584	218739163	218740057	+	1.06711	shSRSF1_rep2
Chr2	229805729	229829288	229805802	229807707	-	1.06711	shSRSF1_rep2
Chr2	231788554	231791808	231788732	231790921	+	1.06711	shSRSF1_rep2
Chr2	239990073	240007370	239990182	240005209	-	2.13422	shSRSF1_rep2
Chr2	240463346	240464746	240463512	240464615	+	1.06711	shSRSF1_rep2
Chr2	241229832	241230269	241229961	241230152	-	4.26843	shSRSF1_rep2
Chr2	241601895	241603079	241601999	241602969	-	1.06711	shSRSF1_rep2
Chr2	241654545	241655343	241654647	241655270	+	11.7382	shSRSF1_rep2
Chr20	1312336	1313498	1312762	1313339	-	1.06711	shSRSF1_rep2
Chr20	2986764	2988474	2986849	2988031	+	3.20133	shSRSF1_rep2
Chr20	3026686	3027841	3027197	3027706	+	2.13422	shSRSF1_rep2
Chr20	3200000	3203416	3200102	3200341	-	2.13422	shSRSF1_rep2
Chr20	13793179	13814515	13793227	13794837	+	1.06711	shSRSF1_rep2
Chr20	17953995	17955475	17954231	17955364	-	1.06711	shSRSF1_rep2
Chr20	18297984	18306393	18305807	18306297	+	1.06711	shSRSF1_rep2
Chr20	25634048	25634827	25634170	25634728	+	1.06711	shSRSF1_rep2
Chr20	32367726	32369123	32367729	32369014	+	5.33554	shSRSF1_rep2
Chr20	32930397	32931336	32930616	32931177	+	1.06711	shSRSF1_rep2
Chr20	34294080	34295585	34294156	34295394	-	1.06711	shSRSF1_rep2
Chr20	35630438	35632025	35631173	35631267	-	2.13422	shSRSF1_rep2
Chr20	36687491	36688784	36687612	36688678	-	1.06711	shSRSF1_rep2
Chr20	36911217	36912552	36911333	36912460	-	2.13422	shSRSF1_rep2
Chr20	37066992	37068186	37067121	37067232	-	1.06711	shSRSF1_rep2
Chr20	45892724	45894072	45892880	45893219	+	1.06711	shSRSF1_rep2
Chr20	49066191	49066510	49066293	49066364	+	1.06711	shSRSF1_rep2
Chr20	49068714	49070297	49068822	49070204	+	3.20133	shSRSF1_rep2
Chr20	49135832	49159146	49135931	49151581	-	1.06711	shSRSF1_rep2
Chr20	49135832	49166285	49135931	49151581	-	2.13422	shSRSF1_rep2
Chr20	50096482	50096820	50096534	50096671	-	2.13422	shSRSF1_rep2
Chr20	50127974	50130947	50128187	50129545	-	1.06711	shSRSF1_rep2
Chr20	58438944	58441083	58439025	58440906	+	39.483	shSRSF1_rep2
Chr20	58903527	58905480	58903585	58903671	+	2.13422	shSRSF1_rep2
Chr20	62139074	62140944	62139197	62139780	-	6.40265	shSRSF1_rep2
Chr20	64022756	64026058	64024693	64025938	+	1.06711	shSRSF1_rep2
Chr21	15762890	15766141	15762968	15765996	+	3.20133	shSRSF1_rep2
Chr21	34102834	34103519	34102908	34103496	+	1.06711	shSRSF1_rep2
Chr21	36333645	36349408	36333718	36336873	+	3.20133	shSRSF1_rep2
Chr21	37420298	37421866	37420384	37421773	+	1.06711	shSRSF1_rep2
Chr21	43959633	43960779	43959859	43960631	+	1.06711	shSRSF1_rep2
Chr21	44063537	44077784	44074470	44075038	+	1.06711	shSRSF1_rep2
Chr21	45118563	45134832	45128573	45132214	+	2.13422	shSRSF1_rep2
Chr22	26457858	26458577	26457967	26458444	-	3.20133	shSRSF1_rep2
Chr22	26496072	26496889	26496316	26496720	-	1.06711	shSRSF1_rep2
Chr22	31611142	31611840	31611303	31611765	+	8.53687	shSRSF1_rep2
Chr22	36518762	36519537	36518910	36519404	-	1.06711	shSRSF1_rep2
Chr22	37623326	37623633	37623467	37623551	+	1.06711	shSRSF1_rep2
Chr22	38245934	38248019	38246100	38247769	-	2.13422	shSRSF1_rep2
Chr22	38498084	38498573	38498150	38498439	-	2.13422	shSRSF1_rep2
Chr22	41256020	41281082	41256105	41256190	-	1.06711	shSRSF1_rep2
Chr22	41338312	41339191	41338355	41339000	+	2.13422	shSRSF1_rep2
Chr22	41808874	41810000	41808993	41809878	+	3.20133	shSRSF1_rep2
Chr22	41808874	41810291	41810000	41810206	+	3.20133	shSRSF1_rep2
Chr22	42168608	42169896	42168736	42169846	-	4.26843	shSRSF1_rep2
Chr22	46433392	46439411	46436289	46439188	-	2.13422	shSRSF1_rep2
Chr22	50193026	50194506	50193654	50194339	+	1.06711	shSRSF1_rep2
Chr22	50516446	50517661	50517482	50517576	+	1.06711	shSRSF1_rep2
Chr3	3156218	3174261	3167793	3172775	-	1.06711	shSRSF1_rep2
Chr3	5174016	5174414	5174084	5174343	+	18.1408	shSRSF1_rep2
Chr3	9428822	9435906	9434882	9435727	+	3.20133	shSRSF1_rep2
Chr3	9762913	9763213	9763052	9763138	-	3.20133	shSRSF1_rep2
Chr3	16301625	16302748	16301868	16302639	+	1.06711	shSRSF1_rep2
Chr3	47086194	47103423	47086314	47088112	-	1.06711	shSRSF1_rep2
Chr3	47661293	47678311	47661455	47662333	-	2.13422	shSRSF1_rep2
Chr3	48858506	48859627	48859201	48859554	-	4.26843	shSRSF1_rep2
Chr3	48979481	48980496	48979633	48980352	+	1.06711	shSRSF1_rep2
Chr3	49297869	49300691	49298635	49300466	-	1.06711	shSRSF1_rep2
Chr3	49699475	49700709	49700564	49700635	+	2.13422	shSRSF1_rep2
Chr3	49847524	49848200	49847608	49848142	-	17.0737	shSRSF1_rep2
Chr3	50113382	50117379	50117171	50117249	+	1.06711	shSRSF1_rep2
Chr3	51630271	51630931	51630388	51630704	+	1.06711	shSRSF1_rep2
Chr3	52912537	52913617	52912647	52913477	-	1.06711	shSRSF1_rep2
Chr3	56627036	56628614	56627145	56627581	-	1.06711	shSRSF1_rep2
Chr3	57864806	57865292	57864857	57865241	+	1.06711	shSRSF1_rep2
Chr3	113249721	113250833	113249899	113250554	+	1.06711	shSRSF1_rep2
Chr3	128806371	128807671	128806590	128807542	+	17.0737	shSRSF1_rep2
Chr3	129254667	129255077	129254743	129254984	+	2.13422	shSRSF1_rep2
Chr3	133623090	133624175	133623193	133623310	-	1.06711	shSRSF1_rep2
Chr3	136945582	136946295	136945752	136946151	+	5.33554	shSRSF1_rep2
Chr3	138570317	138572984	138570498	138571033	-	2.13422	shSRSF1_rep2
Chr3	141903619	141922063	141916020	141921976	+	2.13422	shSRSF1_rep2
Chr3	155829687	155834041	155829755	155829855	-	2.13422	shSRSF1_rep2
Chr3	155833467	155834041	155833585	155833856	-	2.13422	shSRSF1_rep2
Chr3	180933333	180963090	180933386	180935137	+	1.06711	shSRSF1_rep2
Chr3	183800465	183801528	183800568	183801454	+	2.13422	shSRSF1_rep2
Chr3	184305767	184306834	184305930	184306053	+	2.13422	shSRSF1_rep2
Chr3	186784563	186786051	186784696	186784961	+	1.06711	shSRSF1_rep2
Chr3	195381008	195392147	195381062	195381902	-	4.26843	shSRSF1_rep2
Chr3	195381008	195412916	195411009	195412845	-	5.33554	shSRSF1_rep2
Chr3	195410706	195412916	195411009	195412845	-	1.06711	shSRSF1_rep2
Chr3	196058283	196058632	196058365	196058573	-	1.06711	shSRSF1_rep2
Chr4	1735272	1735834	1735325	1735730	+	4.26843	shSRSF1_rep2
Chr4	1799746	1801743	1801536	1801619	+	2.13422	shSRSF1_rep2
Chr4	2625261	2626577	2625395	2626409	+	2.13422	shSRSF1_rep2
Chr4	2945127	2957740	2945229	2946411	-	3.20133	shSRSF1_rep2
Chr4	4648976	4649542	4649109	4649369	+	6.40265	shSRSF1_rep2
Chr4	17623600	17625845	17623794	17625655	+	2.13422	shSRSF1_rep2
Chr4	17814852	17815358	17814998	17815273	+	1.06711	shSRSF1_rep2
Chr4	53382277	53383876	53382335	53383772	+	1.06711	shSRSF1_rep2
Chr4	53428026	53444103	53440608	53442652	+	2.13422	shSRSF1_rep2
Chr4	55599141	55600575	55599181	55600521	-	1.06711	shSRSF1_rep2
Chr4	76144148	76144473	76144292	76144389	-	3.20133	shSRSF1_rep2
Chr4	109530288	109531522	109530464	109531384	+	2.13422	shSRSF1_rep2
Chr4	145152540	145155996	145155686	145155935	-	1.06711	shSRSF1_rep2
Chr4	177339782	177341642	177339857	177341475	+	1.06711	shSRSF1_rep2
Chr5	235143	236599	235339	236427	+	1.06711	shSRSF1_rep2
Chr5	618989	620261	619117	620068	+	26.6777	shSRSF1_rep2
Chr5	819524	821895	819612	821860	-	1.06711	shSRSF1_rep2
Chr5	6651841	6656179	6652008	6656077	+	1.06711	shSRSF1_rep2
Chr5	14678680	14690308	14687646	14690038	+	1.06711	shSRSF1_rep2
Chr5	40764513	40777586	40775503	40777444	-	2.13422	shSRSF1_rep2
Chr5	43161248	43161931	43161613	43161708	+	7.46976	shSRSF1_rep2
Chr5	69174876	69175537	69175113	69175396	+	1.06711	shSRSF1_rep2
Chr5	122795265	122808355	122803613	122808276	+	1.06711	shSRSF1_rep2
Chr5	123588067	123588511	123588153	123588426	+	2.13422	shSRSF1_rep2
Chr5	132883339	132885119	132883560	132885075	-	1.06711	shSRSF1_rep2
Chr5	138319218	138329647	138326054	138328483	-	1.06711	shSRSF1_rep2
Chr5	139278326	139279129	139278408	139278564	+	12.8053	shSRSF1_rep2
Chr5	140482579	140485248	140482667	140485120	+	1.06711	shSRSF1_rep2
Chr5	145817893	145826200	145818054	145819944	-	3.20133	shSRSF1_rep2
Chr5	151042539	151042961	151042671	151042895	-	1.06711	shSRSF1_rep2
Chr5	160010499	160036803	160035200	160036690	+	1.06711	shSRSF1_rep2
Chr5	176295029	176296320	176295262	176296250	+	1.06711	shSRSF1_rep2
Chr5	177041125	177050936	177044533	177050702	+	6.40265	shSRSF1_rep2
Chr5	179707131	179709059	179708380	179708977	+	3.20133	shSRSF1_rep2
Chr5	181241491	181242345	181241639	181242169	-	6.40265	shSRSF1_rep2
Chr6	3737078	3739161	3738969	3739057	-	4.26843	shSRSF1_rep2
Chr6	7176654	7189322	7181246	7181869	+	1.06711	shSRSF1_rep2
Chr6	10697323	10702639	10702489	10702564	+	2.13422	shSRSF1_rep2
Chr6	10702368	10702639	10702489	10702564	+	12.8053	shSRSF1_rep2
Chr6	18236451	18258405	18236596	18237380	-	2.13422	shSRSF1_rep2
Chr6	28271853	28272787	28272339	28272669	+	2.13422	shSRSF1_rep2
Chr6	28907235	28908840	28907262	28908807	-	2.13422	shSRSF1_rep2
Chr6	29604493	29607218	29604637	29604859	-	1.06711	shSRSF1_rep2
Chr6	31148404	31148728	31148511	31148617	-	1.06711	shSRSF1_rep2
Chr6	31835410	31839618	31835451	31836294	+	2.13422	shSRSF1_rep2
Chr6	32120770	32121348	32121124	32121262	-	2.13422	shSRSF1_rep2
Chr6	33320010	33321567	33320224	33320379	-	3.20133	shSRSF1_rep2
Chr6	34646600	34654779	34646798	34654624	-	1.06711	shSRSF1_rep2
Chr6	34821652	34821955	34821815	34821916	+	1.06711	shSRSF1_rep2
Chr6	34821652	34823348	34821815	34821916	+	1.06711	shSRSF1_rep2
Chr6	35870933	35891041	35874339	35886723	-	1.06711	shSRSF1_rep2
Chr6	37471020	37476194	37474646	37475320	+	1.06711	shSRSF1_rep2
Chr6	42883450	42886470	42886083	42886255	+	1.06711	shSRSF1_rep2
Chr6	43498974	43503706	43499100	43500743	+	3.20133	shSRSF1_rep2
Chr6	43587271	43601091	43587489	43597695	+	2.13422	shSRSF1_rep2
Chr6	80127546	80273221	80127624	80129160	+	1.06711	shSRSF1_rep2
Chr6	107098550	107099296	107098753	107099248	-	5.33554	shSRSF1_rep2
Chr6	107503656	107506427	107503795	107506241	+	2.13422	shSRSF1_rep2
Chr6	135039572	135042126	135039767	135042000	-	3.20133	shSRSF1_rep2
Chr6	138207041	138210041	138207123	138209909	+	4.26843	shSRSF1_rep2
Chr6	149771161	149773169	149771266	149772013	+	2.13422	shSRSF1_rep2
Chr6	167896877	167902386	167896972	167898204	+	2.13422	shSRSF1_rep2
Chr6	169632946	169658358	169633068	169634427	-	2.13422	shSRSF1_rep2
Chr7	890927	893971	893815	893898	+	1.06711	shSRSF1_rep2
Chr7	2363631	2364529	2363760	2364371	+	3.20133	shSRSF1_rep2
Chr7	2364371	2369682	2366591	2366998	+	2.13422	shSRSF1_rep2
Chr7	5216562	5217187	5216659	5217089	+	4.26843	shSRSF1_rep2
Chr7	6412810	6416921	6412883	6412965	-	2.13422	shSRSF1_rep2
Chr7	6412810	6421804	6412883	6412965	-	2.13422	shSRSF1_rep2
Chr7	27785162	27785489	27785311	27785398	+	3.20133	shSRSF1_rep2
Chr7	44050224	44058480	44058280	44058428	+	1.06711	shSRSF1_rep2
Chr7	44674410	44675268	44674557	44675177	+	4.26843	shSRSF1_rep2
Chr7	64336258	64336982	64336385	64336886	+	6.40265	shSRSF1_rep2
Chr7	64543706	64544432	64543802	64544305	-	10.6711	shSRSF1_rep2
Chr7	65387901	65388901	65388028	65388805	+	1.06711	shSRSF1_rep2
Chr7	74096621	74097189	74096760	74097079	+	3.20133	shSRSF1_rep2
Chr7	98915722	98917679	98915888	98917422	+	4.26843	shSRSF1_rep2
Chr7	98933240	98935675	98933402	98935578	+	3.20133	shSRSF1_rep2
Chr7	99622548	99624180	99622640	99624056	+	1.06711	shSRSF1_rep2
Chr7	100023418	100024307	100023932	100024153	+	4.26843	shSRSF1_rep2
Chr7	100103408	100103692	100103519	100103611	+	2.13422	shSRSF1_rep2
Chr7	100111727	100112253	100111999	100112107	-	2.13422	shSRSF1_rep2
Chr7	100111727	100114268	100111829	100111921	-	2.13422	shSRSF1_rep2
Chr7	100576693	100577005	100576777	100576901	-	1.06711	shSRSF1_rep2
Chr7	105472131	105502564	105495253	105502419	-	2.13422	shSRSF1_rep2
Chr7	105481051	105502564	105495253	105502419	-	2.13422	shSRSF1_rep2
Chr7	105491539	105506056	105495253	105502419	-	1.06711	shSRSF1_rep2
Chr7	143267616	143268943	143268184	143268787	+	1.06711	shSRSF1_rep2
Chr7	148786550	148787120	148786599	148786988	+	1.06711	shSRSF1_rep2
Chr7	149018991	149021147	149019197	149020966	-	3.20133	shSRSF1_rep2
Chr7	151116792	151143596	151117182	151117370	+	1.06711	shSRSF1_rep2
Chr7	152229922	152238826	152230027	152230219	-	1.06711	shSRSF1_rep2
Chr7	156966269	156967092	156966402	156966960	+	2.13422	shSRSF1_rep2
Chr7	157223253	157225539	157223351	157225406	+	3.20133	shSRSF1_rep2
Chr8	19822438	19845797	19844238	19845703	+	1.06711	shSRSF1_rep2
Chr8	22196679	22197420	22196840	22197239	+	1.06711	shSRSF1_rep2
Chr8	25243673	25278665	25275441	25278568	+	3.20133	shSRSF1_rep2
Chr8	26338889	26360281	26354633	26358911	+	2.13422	shSRSF1_rep2
Chr8	42401787	42403461	42402015	42403310	+	2.13422	shSRSF1_rep2
Chr8	61680967	61684188	61681036	61682438	-	7.46976	shSRSF1_rep2
Chr8	123023712	123030716	123023739	123024985	-	5.33554	shSRSF1_rep2
Chr8	123344883	123348273	123347406	123348182	-	1.06711	shSRSF1_rep2
Chr8	140793353	140864399	140800576	140803542	-	1.06711	shSRSF1_rep2
Chr8	143688661	143690123	143689301	143690056	+	2.13422	shSRSF1_rep2
Chr8	144498769	144501294	144499061	144500095	+	1.06711	shSRSF1_rep2
Chr9	33467393	33467868	33467516	33467690	-	1.06711	shSRSF1_rep2
Chr9	33960825	33973237	33971754	33973182	-	1.06711	shSRSF1_rep2
Chr9	33971650	33973237	33971754	33973182	-	3.20133	shSRSF1_rep2
Chr9	33986759	33998864	33996333	33998786	-	1.06711	shSRSF1_rep2
Chr9	37424844	37426654	37425994	37426537	+	2.13422	shSRSF1_rep2
Chr9	77238001	77238386	77238191	77238271	+	1.06711	shSRSF1_rep2
Chr9	83677726	83686155	83677961	83678440	-	2.13422	shSRSF1_rep2
Chr9	92034809	92038365	92034883	92038247	-	2.13422	shSRSF1_rep2
Chr9	92256679	92269983	92258998	92260150	-	1.06711	shSRSF1_rep2
Chr9	92855810	92856318	92855903	92856191	-	10.6711	shSRSF1_rep2
Chr9	93556381	93561250	93556591	93557826	+	1.06711	shSRSF1_rep2
Chr9	98076917	98078347	98077017	98078192	+	4.26843	shSRSF1_rep2
Chr9	105299219	105299937	105299309	105299742	+	2.13422	shSRSF1_rep2
Chr9	105705596	105722621	105721721	105722533	+	1.06711	shSRSF1_rep2
Chr9	105721536	105722621	105721721	105722533	+	2.13422	shSRSF1_rep2
Chr9	111533738	111534353	111533865	111534260	+	2.13422	shSRSF1_rep2
Chr9	122280442	122291840	122285946	122286038	+	1.06711	shSRSF1_rep2
Chr9	122285168	122291840	122285287	122285779	+	1.06711	shSRSF1_rep2
Chr9	124911900	124921892	124921240	124921722	-	4.26843	shSRSF1_rep2
Chr9	127925106	127925979	127925260	127925866	-	4.26843	shSRSF1_rep2
Chr9	128352637	128353541	128353234	128353414	+	8.53687	shSRSF1_rep2
Chr9	128523279	128523846	128523340	128523591	+	4.26843	shSRSF1_rep2
Chr9	129807187	129809032	129807363	129808904	+	1.06711	shSRSF1_rep2
Chr9	131430089	131432794	131430259	131432616	+	6.40265	shSRSF1_rep2
Chr9	131430093	131432794	131430259	131432616	+	2.13422	shSRSF1_rep2
Chr9	131436619	131439061	131436722	131438988	+	5.33554	shSRSF1_rep2
Chr9	131506113	131506453	131506220	131506402	+	2.13422	shSRSF1_rep2
Chr9	131643238	131650949	131650242	131650809	-	1.06711	shSRSF1_rep2
Chr9	133344124	133346700	133345252	133346539	-	1.06711	shSRSF1_rep2
Chr9	133412298	133412921	133412492	133412777	-	27.7448	shSRSF1_rep2
Chr9	135866455	135883078	135881794	135882815	-	1.06711	shSRSF1_rep2
Chr9	135881632	135883078	135881794	135882815	-	291.321	shSRSF1_rep2
Chr9	136211263	136219164	136218808	136219029	-	4.26843	shSRSF1_rep2
Chr9	136391941	136392777	136392106	136392521	-	3.20133	shSRSF1_rep2
Chr9	136726310	136727086	136726416	136727045	-	2.13422	shSRSF1_rep2
Chr9	136823524	136825826	136823659	136825778	+	2.13422	shSRSF1_rep2
Chr9	136992639	136992974	136992700	136992924	+	1.06711	shSRSF1_rep2
Chr9	137454390	137456486	137455634	137456410	-	1.06711	shSRSF1_rep2
Chr9	137564433	137565154	137564606	137564892	-	16.0066	shSRSF1_rep2
Chr9	137586966	137587823	137587107	137587716	-	1.06711	shSRSF1_rep2
Chr9	137728348	137744090	137743528	137743901	+	1.06711	shSRSF1_rep2
Chr9	137757879	137778055	137776844	137777881	+	1.06711	shSRSF1_rep2
ChrX	23722669	23734367	23733217	23734340	-	1.06711	shSRSF1_rep2
ChrX	24699424	24717758	24717491	24717579	+	2.13422	shSRSF1_rep2
ChrX	24809897	24826601	24821583	24826426	+	3.20133	shSRSF1_rep2
ChrX	47239789	47241699	47240876	47241276	+	1.06711	shSRSF1_rep2
ChrX	49077642	49078112	49077911	49078040	-	1.06711	shSRSF1_rep2
ChrX	51327720	51357027	51327822	51329423	-	1.06711	shSRSF1_rep2
ChrX	54022258	54022843	54022367	54022757	-	1.06711	shSRSF1_rep2
ChrX	80809012	80809304	80809042	80809245	-	9.60398	shSRSF1_rep2
ChrX	129810904	129811509	129811001	129811405	-	2.13422	shSRSF1_rep2
ChrX	131749305	131794466	131794115	131794296	-	1.06711	shSRSF1_rep2
ChrX	150814861	150816078	150814936	150816006	-	2.13422	shSRSF1_rep2
ChrX	153690374	153692107	153690506	153691303	+	2.13422	shSRSF1_rep2
ChrX	154413481	154419746	154419623	154419704	+	1.06711	shSRSF1_rep2
