# Supplementary material for: Systematic identification and characterization of exon–intron circRNAs
Source: Genome Res. 2024 Mar;34(3):376–93. doi: 10.1101/gr.278590.123 (PMC11067877; doi:10.1101/gr.278590.123)
Supplement: Supplement 7 [file Supplemental_Table_S7.xlsx]

## Sheet: Table S7A.SRSF1_KD_gene_count
Supplemental Table S7A: Gene counts in HEK293 cells upon knockdown of SRSF1
gene_id	shCtrl_rep1	shCtrl_rep2	shSRSF1_rep1	shSRSF1_rep2
ENSG00000000003.15	761	1154	343	273
ENSG00000000005.6	0	0	0	0
ENSG00000000419.12	615	611	553	558
ENSG00000000457.14	160	282	200	206
ENSG00000000460.17	373	539	343	278
ENSG00000000938.13	1	0	0	0
ENSG00000000971.16	6	1	1	0
ENSG00000001036.14	915	966	750	935
ENSG00000001084.13	830	810	533	607
ENSG00000001167.14	691	1113	442	430
ENSG00000001460.18	244	247	274	250
ENSG00000001461.17	586	660	992	1077
ENSG00000001497.16	1541	1384	1386	1011
ENSG00000001561.7	356	433	376	391
ENSG00000001617.12	165	279	193	132
ENSG00000001626.16	17	33	11	9
ENSG00000001629.10	384	556	415	548
ENSG00000001630.17	797	927	755	750
ENSG00000001631.15	352	496	303	240
ENSG00000002016.18	201	262	306	250
ENSG00000002079.14	1	2	0	0
ENSG00000002330.13	494	458	814	548
ENSG00000002549.12	954	828	708	633
ENSG00000002586.20	666	635	615	410
ENSG00000002586.20_PAR_Y	666	635	615	410
ENSG00000002587.10	10	18	19	10
ENSG00000002726.20	3	1	5	0
ENSG00000002745.13	12	26	7	9
ENSG00000002746.15	61	89	58	32
ENSG00000002822.15	571	470	522	389
ENSG00000002834.18	1757	1703	1692	1127
ENSG00000002919.14	345	285	454	429
ENSG00000002933.9	0	0	0	0
ENSG00000003056.8	1741	1640	2016	2160
ENSG00000003096.14	284	356	137	118
ENSG00000003137.8	111	79	105	122
ENSG00000003147.19	54	57	96	57
ENSG00000003249.14	532	621	830	693
ENSG00000003393.15	501	585	591	744
ENSG00000003400.15	82	145	113	111
ENSG00000003402.20	291	410	304	307
ENSG00000003436.16	54	61	137	310
ENSG00000003509.16	205	291	240	319
ENSG00000003756.17	1195	1716	1355	1230
ENSG00000003987.14	24	58	23	35
ENSG00000003989.18	1009	1300	762	686
ENSG00000004059.11	1711	1607	1917	1325
ENSG00000004139.14	436	510	507	500
ENSG00000004142.12	1484	1485	1369	1121
ENSG00000004399.12	898	1105	421	220
ENSG00000004455.17	3682	3475	2419	2868
ENSG00000004468.13	0	2	2	1
ENSG00000004478.8	4753	3366	3901	3657
ENSG00000004487.17	2565	3178	2673	2346
ENSG00000004534.15	1020	1046	675	696
ENSG00000004660.15	496	403	549	359
ENSG00000004700.16	1215	1555	1064	1245
ENSG00000004766.17	173	211	333	305
ENSG00000004776.13	3	5	2	3
ENSG00000004777.18	164	181	313	145
ENSG00000004779.10	829	839	702	524
ENSG00000004799.8	45	94	53	20
ENSG00000004809.14	0	0	0	1
ENSG00000004838.14	7	16	5	6
ENSG00000004846.16	0	1	1	1
ENSG00000004848.8	23	22	54	35
ENSG00000004864.14	486	571	561	678
ENSG00000004866.20	225	200	297	333
ENSG00000004897.12	1631	2359	1466	1453
ENSG00000004939.15	4	1	2	3
ENSG00000004948.15	2	2	2	9
ENSG00000004961.15	254	215	285	395
ENSG00000004975.12	984	864	987	670
ENSG00000005001.10	4	2	1	2
ENSG00000005007.13	2823	2756	3178	2613
ENSG00000005020.13	554	984	365	246
ENSG00000005022.6	5339	5465	3935	2709
ENSG00000005059.16	328	382	469	393
ENSG00000005073.6	171	153	130	116
ENSG00000005075.15	469	261	442	272
ENSG00000005100.13	905	1075	745	1259
ENSG00000005102.14	6	16	6	0
ENSG00000005108.16	0	10	0	1
ENSG00000005156.12	531	726	402	322
ENSG00000005175.10	960	987	698	768
ENSG00000005187.12	92	146	86	61
ENSG00000005189.19	164	214	120	132
ENSG00000005194.15	732	863	1023	765
ENSG00000005206.17	808	707	782	446
ENSG00000005238.19	46	70	55	44
ENSG00000005243.10	4	4	6	6
ENSG00000005249.13	289	376	157	94
ENSG00000005302.19	271	329	373	345
ENSG00000005339.15	3323	3517	2861	3339
ENSG00000005379.17	0	0	0	1
ENSG00000005381.8	0	0	0	0
ENSG00000005421.9	0	0	1	0
ENSG00000005436.14	477	573	447	453
ENSG00000005448.17	356	353	273	120
ENSG00000005469.12	133	208	120	104
ENSG00000005471.18	29	20	17	8
ENSG00000005483.21	665	960	912	862
ENSG00000005486.17	579	566	1736	1409
ENSG00000005513.10	135	150	41	57
ENSG00000005700.15	826	1273	385	337
ENSG00000005801.18	736	1032	891	1089
ENSG00000005810.18	872	1174	747	788
ENSG00000005812.11	567	800	644	787
ENSG00000005844.18	4	3	3	2
ENSG00000005882.12	572	584	664	289
ENSG00000005884.18	162	150	196	132
ENSG00000005889.15	1135	1553	881	1011
ENSG00000005893.16	1435	1952	1315	1705
ENSG00000005961.19	142	157	125	47
ENSG00000005981.13	0	1	0	0
ENSG00000006007.12	968	1008	1358	1350
ENSG00000006015.17	526	360	355	98
ENSG00000006016.11	135	181	109	210
ENSG00000006025.12	143	172	138	60
ENSG00000006042.12	597	654	636	412
ENSG00000006047.13	71	39	60	16
ENSG00000006059.4	0	0	0	0
ENSG00000006062.17	204	183	343	546
ENSG00000006071.15	26	50	29	38
ENSG00000006116.4	0	0	0	0
ENSG00000006118.14	1005	1117	1008	672
ENSG00000006125.18	2863	3944	3608	3699
ENSG00000006128.12	12	6	17	52
ENSG00000006194.10	939	886	945	1195
ENSG00000006210.7	35	32	6	13
ENSG00000006282.21	385	392	314	121
ENSG00000006283.18	49	101	5	9
ENSG00000006327.14	441	111	552	1359
ENSG00000006377.11	86	77	53	49
ENSG00000006432.15	243	245	225	304
ENSG00000006451.8	674	779	720	991
ENSG00000006453.14	800	841	885	966
ENSG00000006459.11	221	287	126	202
ENSG00000006468.14	46	41	39	82
ENSG00000006530.18	622	751	435	374
ENSG00000006534.16	31	55	13	13
ENSG00000006555.11	0	0	0	0
ENSG00000006576.16	471	610	523	697
ENSG00000006606.8	2	1	0	1
ENSG00000006607.14	1001	1354	966	1048
ENSG00000006611.16	99	96	98	40
ENSG00000006625.18	975	890	895	730
ENSG00000006634.8	406	405	281	278
ENSG00000006638.13	62	57	51	17
ENSG00000006652.14	500	467	991	2235
ENSG00000006659.13	0	0	0	0
ENSG00000006695.12	237	196	190	187
ENSG00000006704.10	349	340	295	238
ENSG00000006712.15	1054	778	1192	895
ENSG00000006715.16	460	635	676	653
ENSG00000006740.17	242	265	300	281
ENSG00000006744.19	1593	1493	1527	1215
ENSG00000006747.15	44	56	44	19
ENSG00000006756.16	36	50	15	14
ENSG00000006757.12	164	176	140	95
ENSG00000006788.14	0	0	0	0
ENSG00000006831.10	1744	1961	2445	2980
ENSG00000006837.12	9	6	6	18
ENSG00000007001.13	0	0	0	0
ENSG00000007038.11	0	0	0	0
ENSG00000007047.15	411	478	447	315
ENSG00000007062.11	0	1	0	0
ENSG00000007080.11	1128	561	1184	777
ENSG00000007129.18	0	0	0	0
ENSG00000007168.13	1549	2007	1985	2197
ENSG00000007171.18	98	87	53	20
ENSG00000007174.18	1	0	0	1
ENSG00000007202.15	2938	3185	1573	1276
ENSG00000007216.15	0	0	0	0
ENSG00000007237.18	239	281	169	84
ENSG00000007255.10	89	75	79	50
ENSG00000007264.15	15	20	7	16
ENSG00000007306.15	0	0	0	0
ENSG00000007312.13	1	4	0	0
ENSG00000007314.12	33	20	9	7
ENSG00000007341.19	179	226	223	221
ENSG00000007350.17	7	17	0	12
ENSG00000007372.23	678	717	728	521
ENSG00000007376.8	1376	744	1009	628
ENSG00000007384.15	376	338	392	224
ENSG00000007392.16	1068	1185	920	809
ENSG00000007402.11	56	55	87	62
ENSG00000007516.14	74	96	48	48
ENSG00000007520.4	1152	759	882	489
ENSG00000007541.17	1246	922	1287	790
ENSG00000007545.16	1128	1163	1011	951
ENSG00000007866.21	322	325	293	261
ENSG00000007908.16	0	3	0	0
ENSG00000007923.16	1607	1459	1609	1537
ENSG00000007933.13	1	0	0	0
ENSG00000007944.15	237	318	123	166
ENSG00000007952.18	0	0	1	0
ENSG00000007968.7	559	558	973	965
ENSG00000008018.9	2253	2231	2156	1978
ENSG00000008056.14	10	13	19	33
ENSG00000008083.14	769	920	938	729
ENSG00000008086.13	54	91	40	32
ENSG00000008118.10	2	7	1	5
ENSG00000008128.23	692	418	534	446
ENSG00000008130.15	1691	1649	1862	1593
ENSG00000008196.13	0	0	0	0
ENSG00000008197.5	0	0	0	0
ENSG00000008226.20	30	31	29	27
ENSG00000008256.16	845	764	801	864
ENSG00000008277.14	131	227	198	198
ENSG00000008282.8	675	820	196	208
ENSG00000008283.16	190	159	301	240
ENSG00000008294.21	2027	2870	2023	3294
ENSG00000008300.17	85	45	72	85
ENSG00000008311.15	364	522	549	316
ENSG00000008323.15	4	1	0	1
ENSG00000008324.11	172	183	170	175
ENSG00000008382.15	155	183	173	49
ENSG00000008394.13	309	452	221	196
ENSG00000008405.12	587	580	335	522
ENSG00000008438.5	0	0	0	0
ENSG00000008441.16	456	443	236	162
ENSG00000008513.16	205	246	215	161
ENSG00000008516.17	77	51	40	23
ENSG00000008517.17	43	39	29	62
ENSG00000008710.20	3513	3122	3632	2438
ENSG00000008735.14	452	305	625	722
ENSG00000008838.20	2135	1950	3086	2668
ENSG00000008853.17	312	279	246	212
ENSG00000008869.12	608	884	627	734
ENSG00000008952.17	1127	1138	1054	1200
ENSG00000008988.9	3230	2961	3521	2766
ENSG00000009307.16	9019	12029	10078	11692
ENSG00000009335.18	1892	2177	1452	1569
ENSG00000009413.16	496	794	367	454
ENSG00000009694.13	4	2	2	8
ENSG00000009709.12	108	161	278	297
ENSG00000009724.17	37	38	39	26
ENSG00000009765.15	0	0	2	0
ENSG00000009780.15	99	137	85	84
ENSG00000009790.15	23	30	13	17
ENSG00000009830.11	559	488	490	355
ENSG00000009844.16	1029	1231	1056	1106
ENSG00000009950.16	129	93	190	87
ENSG00000009954.11	2186	2283	1948	1505
ENSG00000010017.13	619	1056	694	714
ENSG00000010030.14	3	2	6	10
ENSG00000010072.16	601	638	465	583
ENSG00000010165.20	750	590	468	453
ENSG00000010219.13	200	160	132	131
ENSG00000010244.18	2960	3739	2205	2489
ENSG00000010256.11	1998	2100	2661	2230
ENSG00000010270.13	490	525	410	442
ENSG00000010278.14	812	760	911	750
ENSG00000010282.15	0	0	0	1
ENSG00000010292.13	4182	4901	2211	1327
ENSG00000010295.19	618	507	636	358
ENSG00000010310.9	58	28	45	22
ENSG00000010318.21	50	69	22	17
ENSG00000010319.7	50	62	63	12
ENSG00000010322.16	1390	1860	1698	1089
ENSG00000010327.10	47	62	17	3
ENSG00000010361.14	349	367	202	138
ENSG00000010379.16	10	9	2	7
ENSG00000010404.18	1271	1800	1357	1605
ENSG00000010438.16	1	1	1	0
ENSG00000010539.11	709	891	518	637
ENSG00000010610.10	5	1	1	2
ENSG00000010626.15	39	34	10	12
ENSG00000010671.16	1	3	4	9
ENSG00000010704.18	2	2	2	6
ENSG00000010803.16	561	590	534	362
ENSG00000010810.17	904	1069	791	790
ENSG00000010818.10	346	392	225	330
ENSG00000010932.17	0	0	0	0
ENSG00000011007.12	1481	1484	1985	2479
ENSG00000011009.11	869	702	813	587
ENSG00000011021.23	441	432	391	368
ENSG00000011028.14	326	475	252	177
ENSG00000011052.21	94	78	1160	1158
ENSG00000011083.9	0	0	0	0
ENSG00000011105.14	523	462	775	546
ENSG00000011114.15	479	721	267	314
ENSG00000011132.12	201	146	177	164
ENSG00000011143.17	414	364	295	196
ENSG00000011198.10	208	260	388	598
ENSG00000011201.12	328	380	398	538
ENSG00000011243.18	1272	896	1480	1332
ENSG00000011258.16	638	938	315	362
ENSG00000011260.14	1182	1044	987	1325
ENSG00000011275.18	998	1082	1294	1112
ENSG00000011295.16	684	839	417	442
ENSG00000011304.20	7986	8282	6157	5641
ENSG00000011332.19	192	149	209	178
ENSG00000011347.10	133	126	132	207
ENSG00000011376.12	694	786	719	574
ENSG00000011405.13	1198	1884	613	900
ENSG00000011422.12	104	104	106	160
ENSG00000011426.11	2333	2969	2801	2895
ENSG00000011451.21	1691	1482	1690	1380
ENSG00000011454.17	400	536	649	603
ENSG00000011465.17	1	2	0	0
ENSG00000011478.12	183	186	166	74
ENSG00000011485.15	1667	1602	2016	1666
ENSG00000011523.14	440	541	394	339
ENSG00000011566.15	427	535	358	469
ENSG00000011590.14	5	2	0	0
ENSG00000011600.12	0	0	0	1
ENSG00000011638.10	63	84	88	82
ENSG00000011677.13	17	34	19	11
ENSG00000012048.23	1173	1395	818	443
ENSG00000012061.16	701	517	551	402
ENSG00000012124.17	2	1	0	0
ENSG00000012171.20	53	85	12	7
ENSG00000012174.12	1337	1823	1365	1632
ENSG00000012211.13	219	236	277	237
ENSG00000012223.13	1	0	0	0
ENSG00000012232.9	967	1045	1014	798
ENSG00000012504.15	0	0	0	2
ENSG00000012660.14	1675	2084	1082	1500
ENSG00000012779.11	45	76	26	23
ENSG00000012817.15	0	0	0	0
ENSG00000012822.16	529	618	741	546
ENSG00000012963.15	828	1176	608	483
ENSG00000012983.11	527	794	564	579
ENSG00000013016.16	204	215	62	65
ENSG00000013275.8	1412	1320	1457	1659
ENSG00000013288.9	287	306	692	570
ENSG00000013293.6	0	0	0	0
ENSG00000013297.12	1	1	0	0
ENSG00000013306.16	2766	2260	2275	1608
ENSG00000013364.19	47	35	145	110
ENSG00000013374.16	869	822	1251	1036
ENSG00000013375.16	805	1052	1043	1306
ENSG00000013392.8	100	147	141	75
ENSG00000013441.16	311	690	441	1068
ENSG00000013503.10	395	436	282	300
ENSG00000013523.11	605	717	208	173
ENSG00000013561.18	494	621	625	805
ENSG00000013563.14	339	300	526	362
ENSG00000013573.17	1806	1613	2036	1765
ENSG00000013583.10	320	334	259	195
ENSG00000013588.9	2770	1985	4367	3925
ENSG00000013619.14	111	131	118	132
ENSG00000013725.14	30	33	9	6
ENSG00000013810.19	2497	2256	2705	2481
ENSG00000014123.10	455	814	530	439
ENSG00000014138.9	1504	1599	1005	538
ENSG00000014164.7	440	400	438	368
ENSG00000014216.16	1893	1957	1915	1060
ENSG00000014257.16	10	31	19	6
ENSG00000014641.20	2014	2401	2224	1836
ENSG00000014824.14	925	1200	1051	1058
ENSG00000014914.21	38	66	62	47
ENSG00000014919.13	1053	1506	989	906
ENSG00000015133.19	346	371	214	138
ENSG00000015153.14	241	262	260	304
ENSG00000015171.19	415	494	552	701
ENSG00000015285.11	3	1	2	5
ENSG00000015413.9	1	2	1	2
ENSG00000015475.18	327	323	362	252
ENSG00000015479.19	4845	7012	4636	5219
ENSG00000015520.14	16	12	10	45
ENSG00000015532.10	430	431	727	356
ENSG00000015568.13	310	425	376	843
ENSG00000015592.16	2	0	1	7
ENSG00000015676.18	1190	1076	1183	842
ENSG00000016082.15	48	51	54	50
ENSG00000016391.11	362	421	213	122
ENSG00000016402.13	1	0	0	1
ENSG00000016490.16	0	0	0	0
ENSG00000016602.9	0	0	0	0
ENSG00000016864.18	377	481	508	327
ENSG00000017260.19	1240	1825	1441	1580
ENSG00000017427.17	1	1	0	0
ENSG00000017483.15	0	0	3	3
ENSG00000017797.13	937	973	674	551
ENSG00000018189.13	412	585	412	433
ENSG00000018236.15	70	144	70	40
ENSG00000018280.17	12	8	6	2
ENSG00000018408.14	665	875	537	690
ENSG00000018510.16	945	1385	926	1307
ENSG00000018607.6	0	0	0	0
ENSG00000018610.15	446	393	499	419
ENSG00000018625.15	0	0	0	0
ENSG00000018699.13	410	433	430	409
ENSG00000018869.16	37	85	46	92
ENSG00000019102.12	1	1	1	1
ENSG00000019144.19	442	501	295	145
ENSG00000019169.10	0	0	1	0
ENSG00000019186.10	4	9	2	3
ENSG00000019485.13	219	217	156	186
ENSG00000019505.8	14	18	3	8
ENSG00000019549.13	167	251	29	19
ENSG00000019582.15	7	3	9	7
ENSG00000019991.18	2	4	1	0
ENSG00000019995.6	584	806	650	766
ENSG00000020129.16	1108	1090	788	485
ENSG00000020181.18	641	702	416	242
ENSG00000020219.9	0	1	0	0
ENSG00000020256.20	796	752	620	453
ENSG00000020426.11	311	385	302	310
ENSG00000020577.14	396	359	352	445
ENSG00000020633.18	128	146	140	132
ENSG00000020922.13	1054	1422	1347	1264
ENSG00000021300.14	197	304	228	94
ENSG00000021355.13	218	307	281	167
ENSG00000021461.17	0	0	0	0
ENSG00000021488.13	2	3	4	11
ENSG00000021574.12	400	556	330	385
ENSG00000021645.19	0	0	0	0
ENSG00000021762.20	389	409	468	219
ENSG00000021776.11	472	713	559	511
ENSG00000021826.17	92	155	258	181
ENSG00000021852.13	1	0	2	0
ENSG00000022267.19	2571	3299	2100	1663
ENSG00000022277.12	1378	1311	1479	1261
ENSG00000022355.18	0	0	0	0
ENSG00000022556.16	1	0	1	2
ENSG00000022567.9	154	178	218	157
ENSG00000022840.16	2040	2292	3265	2548
ENSG00000022976.15	276	264	225	202
ENSG00000023041.11	638	768	513	382
ENSG00000023171.18	173	275	101	140
ENSG00000023191.17	2294	1991	2743	2526
ENSG00000023228.14	1255	1672	1337	1307
ENSG00000023287.13	848	1056	765	1226
ENSG00000023318.8	312	337	476	463
ENSG00000023330.15	520	519	575	820
ENSG00000023445.16	25	30	36	89
ENSG00000023516.9	570	978	583	715
ENSG00000023572.9	263	269	459	412
ENSG00000023608.5	198	159	137	211
ENSG00000023697.13	243	432	409	374
ENSG00000023734.11	2207	2189	1564	1875
ENSG00000023839.12	40	46	54	75
ENSG00000023892.11	80	86	61	36
ENSG00000023902.14	366	349	234	195
ENSG00000023909.10	477	531	336	369
ENSG00000024048.10	665	911	828	1027
ENSG00000024422.12	15	12	8	4
ENSG00000024526.17	1093	1725	975	977
ENSG00000024862.17	226	196	349	439
ENSG00000025039.15	197	312	258	269
ENSG00000025156.13	426	639	536	664
ENSG00000025293.17	657	811	928	870
ENSG00000025423.11	42	37	47	30
ENSG00000025434.19	105	92	48	29
ENSG00000025708.14	35	46	29	26
ENSG00000025770.19	1410	1212	1229	1095
ENSG00000025772.8	1298	1255	2685	3210
ENSG00000025796.14	1748	2163	1808	2119
ENSG00000025800.14	1252	1496	1546	1985
ENSG00000026025.16	6719	7770	5182	4433
ENSG00000026036.22	407	243	359	201
ENSG00000026103.22	66	139	46	91
ENSG00000026297.16	241	322	167	80
ENSG00000026508.19	585	483	164	553
ENSG00000026559.14	431	345	250	192
ENSG00000026652.15	270	357	196	284
ENSG00000026751.17	2	0	1	13
ENSG00000026950.17	105	162	103	87
ENSG00000027001.10	237	280	285	211
ENSG00000027075.15	200	287	270	240
ENSG00000027644.5	7	3	0	0
ENSG00000027697.15	280	408	352	453
ENSG00000027847.14	257	197	165	132
ENSG00000027869.11	11	8	3	0
ENSG00000028116.17	302	372	202	220
ENSG00000028137.19	1	2	0	5
ENSG00000028203.18	685	1080	771	722
ENSG00000028277.21	24	14	245	221
ENSG00000028310.18	1052	1134	854	725
ENSG00000028528.15	841	980	730	611
ENSG00000028839.10	307	386	387	439
ENSG00000029153.14	597	655	717	787
ENSG00000029363.17	3672	4741	3087	3434
ENSG00000029364.12	575	780	857	785
ENSG00000029534.21	356	363	255	119
ENSG00000029559.7	0	0	1	4
ENSG00000029639.11	112	176	132	108
ENSG00000029725.17	969	1114	1061	1374
ENSG00000029993.15	1587	1749	1225	838
ENSG00000030066.13	2240	3193	2405	3374
ENSG00000030110.13	773	609	790	834
ENSG00000030304.14	1	1	0	0
ENSG00000030419.16	39	92	43	40
ENSG00000030582.18	2603	2568	3981	2232
ENSG00000031003.10	542	753	660	943
ENSG00000031081.11	96	132	73	49
ENSG00000031691.7	183	237	360	519
ENSG00000031698.13	1867	1828	2699	2854
ENSG00000031823.14	1111	921	1264	1024
ENSG00000032219.19	312	445	373	442
ENSG00000032389.12	460	432	499	413
ENSG00000032444.16	710	635	1181	687
ENSG00000032742.17	91	141	120	97
ENSG00000033011.13	656	527	776	596
ENSG00000033030.15	691	601	640	694
ENSG00000033050.9	1555	1214	1583	1628
ENSG00000033100.16	771	567	981	784
ENSG00000033122.21	182	213	169	57
ENSG00000033170.17	180	267	155	173
ENSG00000033178.13	589	955	406	571
ENSG00000033327.13	201	202	220	309
ENSG00000033627.16	1107	1584	1957	2171
ENSG00000033800.13	596	787	759	760
ENSG00000033867.16	304	513	136	248
ENSG00000034053.14	347	346	338	278
ENSG00000034152.19	566	662	582	463
ENSG00000034239.11	0	0	0	0
ENSG00000034510.6	5687	2687	3668	2463
ENSG00000034533.11	169	171	111	143
ENSG00000034677.13	291	424	253	333
ENSG00000034693.15	303	410	225	257
ENSG00000034713.8	738	756	840	671
ENSG00000034971.17	0	1	0	0
ENSG00000035115.22	89	202	128	111
ENSG00000035141.8	1771	1604	2077	2386
ENSG00000035403.18	4128	4503	4177	4889
ENSG00000035499.13	481	813	473	523
ENSG00000035664.11	14	27	12	12
ENSG00000035681.9	263	298	298	341
ENSG00000035687.10	954	1135	1119	1362
ENSG00000035720.8	0	0	0	0
ENSG00000035862.12	1067	1807	760	489
ENSG00000035928.16	1448	1877	660	743
ENSG00000036054.13	330	476	502	750
ENSG00000036257.13	880	1197	792	1046
ENSG00000036448.10	5	12	0	5
ENSG00000036473.8	0	0	0	0
ENSG00000036530.9	7	5	23	7
ENSG00000036549.13	566	853	526	655
ENSG00000036565.15	0	0	0	0
ENSG00000036672.16	134	126	101	125
ENSG00000036828.17	0	0	0	0
ENSG00000037042.9	211	285	199	123
ENSG00000037241.7	447	398	326	287
ENSG00000037280.16	302	333	365	412
ENSG00000037474.15	2550	2562	2706	3337
ENSG00000037637.11	494	549	465	430
ENSG00000037749.12	254	416	242	393
ENSG00000037757.14	872	830	491	201
ENSG00000037897.17	358	336	303	390
ENSG00000037965.6	150	152	190	108
ENSG00000038002.9	225	263	149	114
ENSG00000038210.14	471	711	361	286
ENSG00000038219.13	984	1181	819	973
ENSG00000038274.17	590	746	598	643
ENSG00000038295.8	8	6	8	13
ENSG00000038358.15	1725	1591	1887	1603
ENSG00000038382.20	2030	2179	1781	2249
ENSG00000038427.16	739	1505	651	1003
ENSG00000038532.16	844	881	1058	1076
ENSG00000038945.15	0	0	0	0
ENSG00000039068.19	5	2	0	6
ENSG00000039123.16	1068	1440	959	1142
ENSG00000039139.9	9	4	1	2
ENSG00000039319.17	720	1295	829	998
ENSG00000039523.20	948	948	573	274
ENSG00000039537.13	1	0	0	0
ENSG00000039560.14	1385	1599	1156	1075
ENSG00000039600.11	0	0	6	27
ENSG00000039650.12	466	406	735	520
ENSG00000039987.7	5	2	1	5
ENSG00000040199.18	359	447	272	292
ENSG00000040275.17	857	1004	779	752
ENSG00000040341.18	339	516	306	285
ENSG00000040487.13	362	329	396	298
ENSG00000040531.16	281	230	255	195
ENSG00000040608.14	159	127	176	116
ENSG00000040633.13	686	630	723	487
ENSG00000040731.10	1	0	0	0
ENSG00000040933.16	646	923	345	337
ENSG00000041353.10	26	34	16	23
ENSG00000041357.16	3412	3533	2921	2325
ENSG00000041515.16	1	2	3	3
ENSG00000041802.11	611	543	664	822
ENSG00000041880.14	64	61	34	17
ENSG00000041982.16	153	174	172	96
ENSG00000041988.15	742	766	999	899
ENSG00000042062.13	1	1	0	1
ENSG00000042088.14	366	493	254	186
ENSG00000042286.15	392	309	405	293
ENSG00000042304.12	0	0	0	0
ENSG00000042317.17	67	123	79	43
ENSG00000042429.12	789	1030	957	1260
ENSG00000042445.14	398	487	498	401
ENSG00000042493.16	68	50	17	8
ENSG00000042753.12	1720	1420	2463	1568
ENSG00000042781.14	2	1	0	1
ENSG00000042813.8	0	0	0	0
ENSG00000042832.12	1	0	0	1
ENSG00000042980.13	5	6	4	1
ENSG00000043039.7	202	138	158	145
ENSG00000043093.15	424	537	489	526
ENSG00000043143.20	287	321	232	130
ENSG00000043355.12	840	879	1068	846
ENSG00000043462.12	0	0	1	0
ENSG00000043514.17	201	321	243	360
ENSG00000043591.6	23	33	16	19
ENSG00000044012.4	0	0	0	1
ENSG00000044090.10	522	798	393	252
ENSG00000044115.21	4484	5227	5935	5975
ENSG00000044446.12	295	355	217	127
ENSG00000044459.15	251	367	163	180
ENSG00000044524.11	56	80	43	36
ENSG00000044574.8	5521	6276	10187	11892
ENSG00000046604.13	1207	1832	978	1181
ENSG00000046647.13	29	49	38	21
ENSG00000046651.15	505	553	316	332
ENSG00000046653.15	66	130	51	73
ENSG00000046774.10	1	1	4	54
ENSG00000046889.19	13	24	15	16
ENSG00000047056.16	130	148	175	171
ENSG00000047188.16	824	1169	673	515
ENSG00000047230.15	0	0	0	0
ENSG00000047249.18	492	585	758	826
ENSG00000047315.17	2109	2905	3047	3699
ENSG00000047346.12	114	199	108	166
ENSG00000047365.12	115	160	122	164
ENSG00000047410.14	3326	4308	4326	4495
ENSG00000047457.14	23	28	43	19
ENSG00000047578.13	257	290	210	204
ENSG00000047579.20	313	251	382	360
ENSG00000047597.7	145	230	175	221
ENSG00000047617.15	19	28	42	57
ENSG00000047621.12	369	437	585	617
ENSG00000047634.15	399	673	382	607
ENSG00000047644.19	236	278	285	308
ENSG00000047648.23	11	13	3	6
ENSG00000047662.5	99	146	56	92
ENSG00000047849.21	3174	3524	3336	2360
ENSG00000047932.14	935	1139	786	1227
ENSG00000047936.10	5	2	0	5
ENSG00000048028.11	556	814	491	363
ENSG00000048052.21	34	85	78	90
ENSG00000048140.18	538	456	624	398
ENSG00000048162.21	351	240	304	440
ENSG00000048342.16	135	180	153	139
ENSG00000048392.12	328	595	495	757
ENSG00000048405.10	215	271	121	157
ENSG00000048462.11	0	0	1	1
ENSG00000048471.14	330	465	371	336
ENSG00000048540.15	0	0	0	0
ENSG00000048544.6	713	822	407	407
ENSG00000048545.14	0	0	0	1
ENSG00000048649.13	1267	1847	1410	1530
ENSG00000048707.15	836	1067	688	532
ENSG00000048740.18	256	391	402	336
ENSG00000048828.17	3479	4267	3012	2996
ENSG00000048991.16	616	737	833	810
ENSG00000049089.15	67	65	26	12
ENSG00000049130.16	185	328	140	189
ENSG00000049167.14	85	80	71	98
ENSG00000049192.15	18	41	36	38
ENSG00000049239.13	657	899	454	237
ENSG00000049245.13	1233	1806	1432	1359
ENSG00000049246.14	178	249	185	212
ENSG00000049247.13	13	31	31	15
ENSG00000049249.9	10	18	9	17
ENSG00000049283.18	3	3	1	1
ENSG00000049323.16	383	686	311	222
ENSG00000049449.10	4314	5084	3781	3486
ENSG00000049540.17	0	1	1	0
ENSG00000049541.11	787	814	991	723
ENSG00000049618.24	877	1043	509	522
ENSG00000049656.14	2458	2153	1213	1256
ENSG00000049759.18	879	1034	1357	2761
ENSG00000049768.16	19	5	8	5
ENSG00000049769.14	131	112	185	116
ENSG00000049860.14	697	776	771	683
ENSG00000049883.15	255	418	226	313
ENSG00000050030.15	24	29	21	23
ENSG00000050130.18	412	556	169	158
ENSG00000050165.18	291	370	485	377
ENSG00000050327.15	237	182	372	348
ENSG00000050344.9	504	528	544	505
ENSG00000050393.11	745	865	772	1055
ENSG00000050405.13	872	1100	919	1251
ENSG00000050426.16	548	734	744	601
ENSG00000050438.17	43	50	29	23
ENSG00000050555.18	448	488	317	192
ENSG00000050628.20	13	22	10	16
ENSG00000050730.16	0	1	2	1
ENSG00000050748.17	859	1041	614	566
ENSG00000050767.17	38	38	23	16
ENSG00000050820.17	726	572	522	436
ENSG00000051009.11	635	582	704	598
ENSG00000051108.15	573	544	1125	1587
ENSG00000051128.19	147	108	98	101
ENSG00000051180.17	183	190	375	341
ENSG00000051341.14	643	864	1044	1154
ENSG00000051382.9	321	383	215	201
ENSG00000051523.11	1279	765	1153	405
ENSG00000051596.10	961	682	952	805
ENSG00000051620.11	826	758	845	884
ENSG00000051825.15	654	1113	440	486
ENSG00000052126.14	751	1067	736	778
ENSG00000052344.16	1	9	0	2
ENSG00000052723.12	876	1497	506	689
ENSG00000052749.14	1155	769	1298	2503
ENSG00000052795.13	309	450	305	357
ENSG00000052802.13	458	777	317	226
ENSG00000052841.15	1066	1346	1807	2361
ENSG00000052850.8	670	644	529	374
ENSG00000053108.17	3	2	3	7
ENSG00000053254.15	519	742	273	257
ENSG00000053328.8	6	3	3	0
ENSG00000053371.12	845	929	285	102
ENSG00000053372.5	1430	1183	1192	1625
ENSG00000053438.11	10	7	16	5
ENSG00000053501.13	158	92	161	94
ENSG00000053524.12	123	136	78	59
ENSG00000053702.15	14	14	12	10
ENSG00000053747.16	189	206	145	106
ENSG00000053770.12	443	618	500	608
ENSG00000053900.10	297	394	386	348
ENSG00000053918.18	84	99	88	73
ENSG00000054116.12	867	698	952	684
ENSG00000054118.15	2671	2888	2237	2351
ENSG00000054148.18	1165	851	1404	880
ENSG00000054179.12	19	11	34	32
ENSG00000054219.11	0	1	0	0
ENSG00000054267.22	656	926	1045	1338
ENSG00000054277.14	55	53	35	35
ENSG00000054282.16	164	216	171	165
ENSG00000054356.14	5	0	1	6
ENSG00000054392.13	51	94	34	33
ENSG00000054523.17	1431	2007	1133	1238
ENSG00000054598.9	2368	2673	2979	2216
ENSG00000054611.14	318	348	363	286
ENSG00000054654.18	1006	1465	1179	860
ENSG00000054690.14	317	439	288	304
ENSG00000054793.14	1033	1479	879	492
ENSG00000054796.13	0	0	0	0
ENSG00000054803.4	0	0	0	0
ENSG00000054938.15	0	1	1	5
ENSG00000054965.10	1551	1944	1056	1023
ENSG00000054967.13	608	424	507	669
ENSG00000054983.17	0	0	0	0
ENSG00000055044.11	2297	1949	2265	2652
ENSG00000055070.17	2821	2619	3273	2837
ENSG00000055118.15	37	38	20	37
ENSG00000055130.17	1268	1359	1581	1628
ENSG00000055147.19	227	275	360	308
ENSG00000055163.20	838	1169	618	436
ENSG00000055208.19	1137	1501	1011	1311
ENSG00000055211.14	355	417	607	609
ENSG00000055332.18	995	1458	1085	1312
ENSG00000055483.19	1109	1022	742	921
ENSG00000055609.18	923	1343	593	907
ENSG00000055732.13	251	380	491	683
ENSG00000055813.6	3	3	5	3
ENSG00000055917.15	1292	1919	1013	1277
ENSG00000055950.16	1218	917	1136	666
ENSG00000055955.17	23	14	16	5
ENSG00000055957.11	1	0	3	0
ENSG00000056050.7	245	290	318	208
ENSG00000056097.16	2589	3156	1999	2725
ENSG00000056277.16	178	347	175	414
ENSG00000056291.17	0	1	1	8
ENSG00000056487.16	27	12	29	88
ENSG00000056558.11	15	15	3	8
ENSG00000056586.16	935	1558	556	782
ENSG00000056736.10	172	230	93	111
ENSG00000056972.20	190	174	238	164
ENSG00000056998.20	189	239	161	103
ENSG00000057019.16	471	648	422	606
ENSG00000057149.16	0	0	0	0
ENSG00000057252.13	815	979	530	543
ENSG00000057294.15	448	628	411	525
ENSG00000057468.7	3	8	1	0
ENSG00000057593.14	1	0	1	0
ENSG00000057608.17	1590	2260	1785	1889
ENSG00000057657.17	4	11	5	11
ENSG00000057663.16	454	549	433	500
ENSG00000057704.13	71	147	82	108
ENSG00000057757.10	1008	788	1184	978
ENSG00000057935.13	536	854	363	355
ENSG00000058056.9	424	631	311	250
ENSG00000058063.16	798	1152	774	950
ENSG00000058085.15	16	17	6	6
ENSG00000058091.17	174	268	234	329
ENSG00000058262.10	4187	4047	5275	5206
ENSG00000058272.19	647	1029	863	1190
ENSG00000058335.15	4	5	8	21
ENSG00000058404.20	38	27	119	103
ENSG00000058453.17	526	529	422	210
ENSG00000058600.16	771	675	746	728
ENSG00000058668.14	566	1050	415	302
ENSG00000058673.16	2344	3139	1812	1920
ENSG00000058729.11	364	481	406	621
ENSG00000058799.15	202	211	257	238
ENSG00000058804.12	1568	2187	1032	848
ENSG00000058866.15	5	5	3	1
ENSG00000059122.16	1356	1276	1485	988
ENSG00000059145.19	1067	1046	571	331
ENSG00000059377.18	22	2	19	4
ENSG00000059378.13	26	37	49	17
ENSG00000059573.9	2739	3093	2097	1775
ENSG00000059588.10	957	1609	711	337
ENSG00000059691.12	327	364	295	285
ENSG00000059728.11	149	163	177	373
ENSG00000059758.8	271	463	362	498
ENSG00000059769.20	232	205	457	655
ENSG00000059804.16	1622	1043	1902	5203
ENSG00000059915.17	21	12	15	22
ENSG00000060069.17	683	504	357	390
ENSG00000060138.13	4752	5091	5724	7977
ENSG00000060140.9	11	46	35	51
ENSG00000060237.17	4128	5597	3836	3586
ENSG00000060303.5	0	0	0	0
ENSG00000060339.14	2289	2762	1985	1940
ENSG00000060491.16	1185	785	1220	711
ENSG00000060558.4	1	1	1	3
ENSG00000060566.14	0	0	1	0
ENSG00000060642.11	139	171	85	41
ENSG00000060656.20	1254	1285	1425	750
ENSG00000060688.13	874	887	884	870
ENSG00000060709.15	6	5	0	10
ENSG00000060718.22	0	0	0	1
ENSG00000060749.15	1450	2517	962	1202
ENSG00000060762.19	347	357	386	294
ENSG00000060971.18	388	344	368	216
ENSG00000060982.15	1346	1555	1157	1140
ENSG00000061273.18	1092	1082	845	554
ENSG00000061337.15	401	493	250	220
ENSG00000061455.11	202	240	160	132
ENSG00000061492.12	0	1	0	0
ENSG00000061656.10	24	25	9	11
ENSG00000061676.15	1916	2574	2235	3046
ENSG00000061794.13	1315	1620	1820	2389
ENSG00000061918.13	167	206	283	220
ENSG00000061936.9	1209	1098	1276	1101
ENSG00000061938.19	653	637	702	295
ENSG00000061987.16	820	1383	1257	1608
ENSG00000062038.14	231	286	176	128
ENSG00000062096.15	0	0	0	0
ENSG00000062194.16	1182	1528	1388	1689
ENSG00000062282.15	210	179	269	221
ENSG00000062370.16	111	137	104	121
ENSG00000062485.19	6449	8192	4846	4606
ENSG00000062524.16	50	63	63	19
ENSG00000062582.14	948	699	1023	735
ENSG00000062598.18	464	612	360	387
ENSG00000062650.19	1747	2290	1811	2226
ENSG00000062716.13	751	833	945	1058
ENSG00000062725.10	438	681	596	702
ENSG00000062822.15	2213	1854	2430	1472
ENSG00000063015.20	0	0	0	0
ENSG00000063046.17	5838	6724	6251	5772
ENSG00000063127.16	25	37	28	25
ENSG00000063169.10	467	469	618	563
ENSG00000063176.16	403	296	573	257
ENSG00000063177.13	12628	9834	16923	12427
ENSG00000063180.9	132	164	174	74
ENSG00000063241.8	416	413	486	270
ENSG00000063244.12	4525	3324	3458	3032
ENSG00000063245.15	1953	1696	2387	2084
ENSG00000063322.15	940	839	1255	1066
ENSG00000063438.17	22	50	24	37
ENSG00000063515.2	0	0	4	0
ENSG00000063587.15	644	836	522	474
ENSG00000063601.17	629	909	767	935
ENSG00000063660.9	732	747	917	832
ENSG00000063761.16	92	101	158	115
ENSG00000063854.13	579	375	683	315
ENSG00000063978.16	521	781	956	1100
ENSG00000064012.22	397	510	449	576
ENSG00000064042.18	183	329	207	143
ENSG00000064102.15	848	981	555	630
ENSG00000064115.11	1007	1342	1354	1026
ENSG00000064195.7	213	231	114	60
ENSG00000064199.6	142	131	270	241
ENSG00000064201.16	1	6	0	0
ENSG00000064205.10	3	2	0	0
ENSG00000064218.5	133	134	94	55
ENSG00000064225.12	77	151	159	147
ENSG00000064270.12	9	12	8	4
ENSG00000064300.9	103	61	106	155
ENSG00000064309.14	348	643	302	125
ENSG00000064313.12	706	931	491	583
ENSG00000064393.16	1011	1324	667	608
ENSG00000064419.13	1092	1251	1389	1422
ENSG00000064489.23	39	17	54	26
ENSG00000064490.14	449	345	468	241
ENSG00000064545.15	678	600	549	270
ENSG00000064547.14	101	105	81	80
ENSG00000064601.19	897	849	1578	1168
ENSG00000064607.17	1597	1946	1798	1305
ENSG00000064651.14	376	526	342	420
ENSG00000064652.11	109	174	158	196
ENSG00000064655.19	152	214	245	218
ENSG00000064666.15	532	489	1180	1232
ENSG00000064687.13	207	231	281	180
ENSG00000064692.19	25	31	26	14
ENSG00000064703.12	661	885	648	704
ENSG00000064726.10	1144	1612	1506	2009
ENSG00000064763.11	485	692	366	316
ENSG00000064787.13	6	4	3	4
ENSG00000064835.11	0	0	0	0
ENSG00000064886.14	0	0	0	0
ENSG00000064932.16	511	423	680	514
ENSG00000064933.18	227	354	176	218
ENSG00000064961.19	1821	1417	1743	691
ENSG00000064989.13	3	3	2	9
ENSG00000064995.18	648	648	609	528
ENSG00000064999.15	938	969	941	785
ENSG00000065000.19	3702	3332	3652	2633
ENSG00000065029.15	435	499	681	389
ENSG00000065054.14	527	455	459	224
ENSG00000065057.9	390	295	337	159
ENSG00000065060.17	715	847	701	807
ENSG00000065135.12	1269	1546	1159	1358
ENSG00000065150.21	2411	3514	2797	3408
ENSG00000065154.12	1948	2164	1268	1667
ENSG00000065183.16	1005	1169	846	1446
ENSG00000065243.20	1328	1970	1005	1156
ENSG00000065268.11	845	613	799	511
ENSG00000065308.5	693	768	563	511
ENSG00000065320.9	808	732	1187	984
ENSG00000065325.13	0	2	1	0
ENSG00000065328.16	635	595	596	679
ENSG00000065357.20	181	259	238	156
ENSG00000065361.16	191	182	190	134
ENSG00000065371.17	0	0	0	0
ENSG00000065413.20	59	113	67	61
ENSG00000065427.14	1960	2127	2186	2907
ENSG00000065457.10	157	190	86	85
ENSG00000065485.20	237	233	283	203
ENSG00000065491.8	206	312	373	482
ENSG00000065518.8	898	946	1131	1145
ENSG00000065526.12	9284	12784	6566	7043
ENSG00000065534.18	264	397	200	175
ENSG00000065548.18	1421	1429	1065	1309
ENSG00000065559.15	562	740	244	243
ENSG00000065600.12	157	175	127	161
ENSG00000065609.14	41	66	80	74
ENSG00000065613.15	1637	2062	1913	2437
ENSG00000065615.14	192	237	181	284
ENSG00000065618.21	2	10	2	14
ENSG00000065621.15	43	52	51	75
ENSG00000065665.21	158	220	154	138
ENSG00000065675.15	60	85	35	49
ENSG00000065717.15	83	157	99	60
ENSG00000065802.12	473	521	417	461
ENSG00000065809.13	364	469	288	321
ENSG00000065833.9	382	581	301	343
ENSG00000065882.16	613	870	558	430
ENSG00000065883.16	820	997	696	677
ENSG00000065911.12	2476	2627	2032	2297
ENSG00000065923.10	300	434	311	287
ENSG00000065970.9	389	464	407	510
ENSG00000065978.19	19545	14096	18215	15037
ENSG00000065989.16	398	335	306	259
ENSG00000066027.12	318	395	305	291
ENSG00000066032.18	0	0	0	0
ENSG00000066044.15	1863	2282	2136	1843
ENSG00000066056.14	0	0	0	0
ENSG00000066084.13	966	1363	1065	1451
ENSG00000066117.15	1828	1997	2529	2203
ENSG00000066135.13	1322	1611	923	679
ENSG00000066136.20	705	767	923	840
ENSG00000066185.13	0	0	3	2
ENSG00000066230.12	352	326	262	188
ENSG00000066248.15	86	89	48	58
ENSG00000066279.18	1606	2671	1507	1805
ENSG00000066294.15	0	3	0	0
ENSG00000066322.15	962	673	928	746
ENSG00000066336.12	0	0	1	3
ENSG00000066379.15	238	180	243	228
ENSG00000066382.16	84	120	103	64
ENSG00000066405.13	9	7	4	4
ENSG00000066422.5	454	675	386	584
ENSG00000066427.24	177	290	208	254
ENSG00000066455.13	374	479	331	227
ENSG00000066468.23	523	742	446	290
ENSG00000066557.6	480	712	590	789
ENSG00000066583.12	478	556	308	252
ENSG00000066629.18	474	501	354	203
ENSG00000066651.20	337	439	163	202
ENSG00000066654.14	545	634	494	482
ENSG00000066697.14	215	212	159	186
ENSG00000066735.14	645	627	589	368
ENSG00000066739.12	768	999	626	670
ENSG00000066777.9	466	645	429	491
ENSG00000066813.14	0	0	0	0
ENSG00000066827.16	131	178	122	95
ENSG00000066855.16	432	590	490	673
ENSG00000066923.17	47	40	21	20
ENSG00000066926.12	938	1238	1115	640
ENSG00000066933.16	546	773	313	339
ENSG00000067048.17	0	0	0	0
ENSG00000067057.17	2570	2156	3100	2595
ENSG00000067064.11	748	1039	683	577
ENSG00000067066.17	205	187	328	407
ENSG00000067082.15	448	465	338	545
ENSG00000067113.17	169	157	132	126
ENSG00000067141.17	1545	2197	1542	1431
ENSG00000067167.8	1237	1665	1515	1654
ENSG00000067177.15	643	752	637	613
ENSG00000067182.8	810	796	992	722
ENSG00000067191.16	123	112	107	112
ENSG00000067208.14	296	462	148	141
ENSG00000067221.14	96	79	97	71
ENSG00000067225.18	16623	15669	17072	15694
ENSG00000067248.10	501	600	514	471
ENSG00000067334.14	1154	1082	1016	1091
ENSG00000067365.15	275	327	234	244
ENSG00000067369.14	762	929	1016	893
ENSG00000067445.21	923	1266	497	363
ENSG00000067533.6	554	512	615	720
ENSG00000067560.12	3899	5537	3725	3095
ENSG00000067596.12	1164	1419	1478	1628
ENSG00000067601.8	13	13	7	3
ENSG00000067606.17	421	471	566	516
ENSG00000067646.12	0	0	0	0
ENSG00000067704.10	1617	2175	1225	870
ENSG00000067715.14	27	53	39	57
ENSG00000067798.16	3	3	1	3
ENSG00000067829.19	710	690	838	516
ENSG00000067836.13	355	257	360	178
ENSG00000067840.12	217	174	335	180
ENSG00000067842.17	2	5	3	12
ENSG00000067900.8	827	1140	789	896
ENSG00000067955.15	848	955	1074	1291
ENSG00000067992.15	1473	2248	1285	950
ENSG00000068001.14	394	312	239	191
ENSG00000068024.16	201	182	139	140
ENSG00000068028.17	339	232	267	354
ENSG00000068078.18	1506	1309	2040	1236
ENSG00000068079.8	87	66	92	36
ENSG00000068097.15	376	555	503	489
ENSG00000068120.15	1140	1301	1407	821
ENSG00000068137.15	462	457	578	187
ENSG00000068305.17	837	1009	632	701
ENSG00000068308.13	1224	1171	2155	1689
ENSG00000068323.17	693	691	825	806
ENSG00000068354.16	227	239	315	258
ENSG00000068366.20	552	745	453	704
ENSG00000068383.19	479	535	351	239
ENSG00000068394.11	542	350	703	547
ENSG00000068400.13	717	679	999	685
ENSG00000068438.15	622	578	557	481
ENSG00000068489.13	990	1109	1218	1201
ENSG00000068615.19	83	128	157	125
ENSG00000068650.18	648	749	520	487
ENSG00000068654.16	1836	1892	2086	2553
ENSG00000068697.7	1436	1711	2285	2117
ENSG00000068724.17	282	235	211	178
ENSG00000068745.15	795	1031	1497	1538
ENSG00000068781.21	4	0	0	0
ENSG00000068784.13	360	529	298	270
ENSG00000068796.18	1321	1815	1600	1904
ENSG00000068831.19	41	46	23	12
ENSG00000068878.15	1417	1877	1397	1851
ENSG00000068885.15	284	489	264	237
ENSG00000068903.20	458	387	541	379
ENSG00000068912.14	561	704	1004	986
ENSG00000068971.14	110	113	197	238
ENSG00000068976.14	14	6	12	20
ENSG00000068985.5	0	0	0	0
ENSG00000069011.16	639	493	503	321
ENSG00000069018.19	0	0	0	1
ENSG00000069020.18	133	180	178	249
ENSG00000069122.19	6	22	7	3
ENSG00000069188.17	237	294	131	77
ENSG00000069206.15	0	0	0	0
ENSG00000069248.12	1726	2332	2686	2615
ENSG00000069275.13	6731	9320	4992	3542
ENSG00000069329.18	1528	2181	1378	1660
ENSG00000069345.12	983	1086	1055	1325
ENSG00000069399.15	26	30	43	29
ENSG00000069424.15	260	227	363	220
ENSG00000069431.11	9	16	9	8
ENSG00000069482.7	887	516	473	587
ENSG00000069493.15	53	73	81	29
ENSG00000069509.6	408	494	394	394
ENSG00000069535.14	68	100	84	39
ENSG00000069667.16	90	149	87	194
ENSG00000069696.7	11	5	9	6
ENSG00000069702.11	300	414	353	310
ENSG00000069764.10	0	0	0	0
ENSG00000069812.11	22	27	31	30
ENSG00000069849.11	2205	2026	1464	1491
ENSG00000069869.16	208	357	266	301
ENSG00000069943.10	62	95	58	70
ENSG00000069956.12	465	573	537	744
ENSG00000069966.18	117	175	174	156
ENSG00000069974.16	67	82	79	79
ENSG00000069998.12	972	835	615	456
ENSG00000070010.19	946	982	991	1181
ENSG00000070018.9	890	1288	864	1181
ENSG00000070019.5	0	1	0	3
ENSG00000070031.4	0	0	0	0
ENSG00000070047.13	2141	1501	2382	1996
ENSG00000070061.15	1618	2042	1515	1460
ENSG00000070081.17	957	1078	1077	825
ENSG00000070087.14	2246	3153	1252	1137
ENSG00000070159.14	386	510	545	430
ENSG00000070182.21	313	252	403	262
ENSG00000070190.13	0	0	1	6
ENSG00000070193.5	0	0	0	0
ENSG00000070214.16	826	1401	585	371
ENSG00000070269.14	121	212	239	229
ENSG00000070366.14	574	591	470	394
ENSG00000070367.16	1211	1677	1255	1599
ENSG00000070371.16	266	329	187	96
ENSG00000070388.11	5	2	38	12
ENSG00000070404.10	145	88	113	199
ENSG00000070413.20	1607	1569	2011	1211
ENSG00000070423.18	1051	911	1403	1284
ENSG00000070444.15	500	515	392	306
ENSG00000070476.15	691	824	552	395
ENSG00000070495.14	439	325	614	664
ENSG00000070501.12	293	295	300	327
ENSG00000070526.15	1	9	1	2
ENSG00000070540.13	75	95	105	107
ENSG00000070601.10	27	34	26	3
ENSG00000070610.14	755	734	926	789
ENSG00000070614.15	1203	1206	894	693
ENSG00000070669.17	1049	988	1560	1303
ENSG00000070718.12	503	598	555	607
ENSG00000070729.14	0	1	0	2
ENSG00000070731.11	10	24	24	16
ENSG00000070748.19	1	0	0	0
ENSG00000070756.16	8386	12691	7290	9438
ENSG00000070759.17	149	197	207	165
ENSG00000070761.8	572	554	692	626
ENSG00000070770.9	953	1113	450	408
ENSG00000070778.13	154	190	200	220
ENSG00000070785.17	658	557	352	340
ENSG00000070808.16	1	0	0	0
ENSG00000070814.22	3664	3027	3820	4354
ENSG00000070831.17	3374	3777	4222	4011
ENSG00000070882.13	686	772	887	1075
ENSG00000070886.12	28	31	28	38
ENSG00000070915.10	5	1	0	0
ENSG00000070950.10	648	812	668	807
ENSG00000070961.15	1092	1438	1616	1586
ENSG00000070985.13	1	2	1	0
ENSG00000071051.14	527	595	481	415
ENSG00000071054.16	2021	2463	2142	2004
ENSG00000071073.13	177	251	232	267
ENSG00000071082.11	6171	5926	7040	5122
ENSG00000071127.17	1932	1853	2220	2221
ENSG00000071189.21	403	608	573	714
ENSG00000071203.9	0	0	0	0
ENSG00000071205.12	150	142	154	172
ENSG00000071242.12	285	247	256	165
ENSG00000071243.16	305	325	196	235
ENSG00000071246.11	357	378	209	79
ENSG00000071282.12	319	342	299	427
ENSG00000071462.12	989	788	1589	1476
ENSG00000071537.14	655	955	474	619
ENSG00000071539.14	1403	1706	1650	1485
ENSG00000071553.17	1657	1840	2807	1842
ENSG00000071564.17	1209	1224	1229	1037
ENSG00000071575.11	581	783	386	235
ENSG00000071626.17	2325	1970	2062	1620
ENSG00000071655.18	1777	1409	1266	610
ENSG00000071677.1	0	0	0	0
ENSG00000071794.16	1420	2325	1926	1876
ENSG00000071859.15	871	552	912	731
ENSG00000071889.16	509	342	321	160
ENSG00000071894.17	1939	1864	1984	1499
ENSG00000071909.18	0	5	3	0
ENSG00000071967.12	120	186	280	242
ENSG00000071991.9	0	0	0	0
ENSG00000071994.11	1174	1227	955	1007
ENSG00000072041.17	703	896	211	419
ENSG00000072042.13	736	768	906	1104
ENSG00000072062.14	866	954	1263	1087
ENSG00000072071.16	1308	1263	1188	993
ENSG00000072080.11	0	0	1	0
ENSG00000072110.13	1400	1470	1156	1244
ENSG00000072121.16	453	438	555	665
ENSG00000072133.11	85	156	70	68
ENSG00000072134.15	420	455	359	361
ENSG00000072135.13	290	311	359	190
ENSG00000072163.19	44	59	82	35
ENSG00000072182.12	5	1	1	1
ENSG00000072195.15	307	303	214	75
ENSG00000072201.14	40	64	101	75
ENSG00000072210.19	646	933	659	537
ENSG00000072274.13	1815	2522	2857	6084
ENSG00000072310.17	423	575	492	291
ENSG00000072315.3	0	0	0	0
ENSG00000072364.13	1416	2272	651	1371
ENSG00000072401.15	387	539	336	547
ENSG00000072415.9	467	668	374	426
ENSG00000072422.17	235	395	111	94
ENSG00000072501.18	8382	8912	3234	2430
ENSG00000072506.13	947	732	1484	1218
ENSG00000072518.20	990	955	1387	1708
ENSG00000072571.20	640	769	627	578
ENSG00000072609.17	423	455	541	550
ENSG00000072657.9	2	11	7	6
ENSG00000072682.18	201	210	213	213
ENSG00000072694.21	0	0	0	0
ENSG00000072736.19	701	771	822	804
ENSG00000072756.17	174	218	128	225
ENSG00000072778.20	1108	1013	1820	1944
ENSG00000072786.13	389	374	339	284
ENSG00000072803.17	787	1028	1023	1310
ENSG00000072818.12	13	5	4	7
ENSG00000072832.15	43	99	36	37
ENSG00000072840.13	259	340	172	102
ENSG00000072849.11	413	486	486	481
ENSG00000072858.10	6	15	8	4
ENSG00000072864.15	637	817	648	608
ENSG00000072952.18	3	0	0	1
ENSG00000072954.7	88	99	162	127
ENSG00000072958.8	1015	944	1289	900
ENSG00000073008.15	730	589	722	1175
ENSG00000073050.12	388	300	385	271
ENSG00000073060.16	1286	1387	805	468
ENSG00000073067.14	1	3	1	1
ENSG00000073111.14	4626	5360	6757	6288
ENSG00000073146.16	3	2	1	1
ENSG00000073150.14	234	286	104	47
ENSG00000073169.14	808	702	1141	684
ENSG00000073282.13	2	0	0	3
ENSG00000073331.18	80	121	147	90
ENSG00000073350.14	418	388	583	471
ENSG00000073417.15	354	432	434	527
ENSG00000073464.12	93	132	62	69
ENSG00000073536.18	581	521	510	522
ENSG00000073578.17	3248	2937	4762	3762
ENSG00000073584.20	2256	2913	1134	949
ENSG00000073598.6	7	3	3	15
ENSG00000073605.18	94	104	62	58
ENSG00000073614.13	1105	1396	896	1222
ENSG00000073670.14	296	259	146	132
ENSG00000073711.11	143	310	160	170
ENSG00000073712.15	579	771	395	511
ENSG00000073734.10	2	0	0	0
ENSG00000073737.16	1	0	1	10
ENSG00000073754.6	0	0	0	1
ENSG00000073756.12	7	7	11	47
ENSG00000073792.16	1127	1352	1048	942
ENSG00000073803.14	291	299	326	306
ENSG00000073849.15	263	356	297	187
ENSG00000073861.3	7	1	1	7
ENSG00000073905.8	1	2	1	2
ENSG00000073910.22	67	103	92	72
ENSG00000073921.18	1620	2327	1041	1009
ENSG00000073969.18	864	1166	1431	1703
ENSG00000074047.21	447	473	177	74
ENSG00000074054.18	884	1314	1004	998
ENSG00000074071.15	2378	1466	2439	1454
ENSG00000074181.9	614	1081	224	93
ENSG00000074201.9	2069	2511	1468	1154
ENSG00000074211.14	174	146	179	195
ENSG00000074219.14	503	757	361	197
ENSG00000074266.21	563	554	762	1040
ENSG00000074276.10	2	0	2	1
ENSG00000074317.11	24	21	7	14
ENSG00000074319.13	952	1046	1309	1262
ENSG00000074356.17	1039	1231	1751	1709
ENSG00000074370.18	195	233	91	36
ENSG00000074410.14	210	272	222	85
ENSG00000074416.14	103	123	72	121
ENSG00000074527.13	102	153	73	30
ENSG00000074582.15	614	537	573	659
ENSG00000074590.13	663	677	461	432
ENSG00000074603.19	464	697	516	568
ENSG00000074621.14	217	316	113	64
ENSG00000074657.13	557	915	290	283
ENSG00000074660.16	5	10	4	3
ENSG00000074695.6	3258	4513	4360	5473
ENSG00000074696.13	3366	4381	4199	3852
ENSG00000074706.13	9	29	18	13
ENSG00000074755.15	1109	1250	1115	945
ENSG00000074771.4	1	0	0	0
ENSG00000074800.16	29704	24915	29025	27744
ENSG00000074803.20	0	0	0	1
ENSG00000074842.8	824	586	1147	950
ENSG00000074855.11	152	222	165	51
ENSG00000074935.14	215	326	258	314
ENSG00000074964.17	198	181	261	156
ENSG00000074966.11	2	15	8	13
ENSG00000075035.10	0	0	0	2
ENSG00000075043.18	149	126	210	198
ENSG00000075073.15	0	3	0	3
ENSG00000075089.9	371	467	489	545
ENSG00000075131.10	482	499	451	477
ENSG00000075142.14	522	505	533	379
ENSG00000075151.20	2453	3124	1497	1228
ENSG00000075188.9	412	577	454	373
ENSG00000075213.11	23	62	34	33
ENSG00000075218.19	1581	1569	1330	1016
ENSG00000075223.14	123	293	196	124
ENSG00000075234.17	609	608	1298	947
ENSG00000075239.14	937	1216	1327	1191
ENSG00000075240.17	466	450	595	431
ENSG00000075275.17	1427	1683	1446	1182
ENSG00000075290.8	11	11	1	0
ENSG00000075292.19	1662	2303	1568	1359
ENSG00000075303.13	152	255	126	119
ENSG00000075336.12	309	334	220	191
ENSG00000075340.23	898	885	645	429
ENSG00000075388.4	0	1	0	2
ENSG00000075391.16	483	561	508	687
ENSG00000075399.14	237	215	232	120
ENSG00000075407.18	678	860	414	580
ENSG00000075413.18	832	837	850	739
ENSG00000075415.13	4879	4954	6888	6695
ENSG00000075420.13	410	516	627	937
ENSG00000075426.12	409	247	253	525
ENSG00000075429.9	3	0	1	0
ENSG00000075461.6	22	17	10	19
ENSG00000075539.15	384	650	342	431
ENSG00000075568.17	763	1076	738	811
ENSG00000075618.18	7365	6904	9841	15528
ENSG00000075624.16	24211	29907	21788	24643
ENSG00000075643.6	133	104	90	55
ENSG00000075651.16	75	190	159	99
ENSG00000075673.11	21	25	5	3
ENSG00000075702.18	520	452	444	361
ENSG00000075711.21	604	768	431	440
ENSG00000075785.13	3074	2646	3121	3339
ENSG00000075790.10	230	349	377	286
ENSG00000075826.17	310	345	983	833
ENSG00000075856.12	1345	1463	1242	1137
ENSG00000075884.14	1	0	0	0
ENSG00000075886.11	2	0	3	1
ENSG00000075891.22	40	64	6	5
ENSG00000075914.13	330	247	296	305
ENSG00000075945.13	309	421	258	271
ENSG00000075975.16	677	742	577	707
ENSG00000076003.5	2360	3079	3148	2085
ENSG00000076043.10	492	513	504	584
ENSG00000076053.10	276	364	294	392
ENSG00000076067.13	687	1053	699	689
ENSG00000076108.11	4303	4939	5517	5293
ENSG00000076201.15	643	816	811	879
ENSG00000076242.16	565	678	862	697
ENSG00000076248.11	2080	1857	1771	1096
ENSG00000076258.10	14	34	22	18
ENSG00000076321.11	212	280	272	336
ENSG00000076344.16	2	12	6	2
ENSG00000076351.13	413	469	467	389
ENSG00000076356.7	582	490	380	466
ENSG00000076382.17	1412	1656	1779	1501
ENSG00000076513.17	683	841	535	480
ENSG00000076554.15	741	1009	992	1206
ENSG00000076555.15	287	418	214	88
ENSG00000076604.15	1064	1009	1538	1462
ENSG00000076641.4	129	223	62	72
ENSG00000076650.7	221	225	249	219
ENSG00000076662.10	96	72	60	27
ENSG00000076685.18	769	947	937	883
ENSG00000076706.17	443	595	96	54
ENSG00000076716.9	604	1073	924	804
ENSG00000076770.14	239	427	86	105
ENSG00000076826.9	433	309	490	379
ENSG00000076864.19	89	77	94	60
ENSG00000076924.12	856	800	1218	1126
ENSG00000076928.18	630	573	771	476
ENSG00000076944.16	159	139	209	216
ENSG00000076984.17	765	693	997	880
ENSG00000077009.13	11	6	7	12
ENSG00000077044.10	622	586	867	857
ENSG00000077063.11	90	156	137	107
ENSG00000077080.10	0	5	1	0
ENSG00000077092.19	22	48	20	10
ENSG00000077097.15	2089	2878	2186	1911
ENSG00000077147.16	3106	4017	2861	3486
ENSG00000077150.20	385	286	589	956
ENSG00000077152.11	435	528	666	726
ENSG00000077157.22	183	251	217	223
ENSG00000077232.18	1185	1873	1120	1199
ENSG00000077235.18	2651	2776	2196	1715
ENSG00000077238.14	137	119	94	94
ENSG00000077254.14	1069	1525	1619	1752
ENSG00000077264.15	25	42	50	41
ENSG00000077274.9	45	53	58	36
ENSG00000077279.19	2	0	0	0
ENSG00000077312.9	1550	1293	1695	1143
ENSG00000077327.16	0	1	0	0
ENSG00000077348.9	388	239	452	418
ENSG00000077380.15	898	1031	811	750
ENSG00000077420.16	1	0	1	0
ENSG00000077454.16	429	361	593	399
ENSG00000077458.13	475	646	331	414
ENSG00000077463.15	310	216	385	337
ENSG00000077498.9	0	1	0	0
ENSG00000077514.9	782	928	1705	1260
ENSG00000077522.13	140	137	177	296
ENSG00000077549.19	2306	2414	2627	2098
ENSG00000077585.14	140	143	164	204
ENSG00000077616.11	246	495	293	190
ENSG00000077684.16	577	589	504	485
ENSG00000077713.19	135	166	91	81
ENSG00000077721.16	1021	1278	1230	1475
ENSG00000077782.21	1338	1233	1447	1352
ENSG00000077800.13	1	1	2	1
ENSG00000077935.17	3	2	1	11
ENSG00000077942.19	1431	2509	1585	976
ENSG00000077943.8	33	85	17	5
ENSG00000077984.6	0	0	0	0
ENSG00000078018.20	56	109	35	24
ENSG00000078043.16	228	313	261	372
ENSG00000078053.17	48	90	143	93
ENSG00000078061.13	517	548	618	500
ENSG00000078070.13	299	367	564	514
ENSG00000078081.8	65	85	139	160
ENSG00000078098.14	0	0	3	0
ENSG00000078114.18	155	243	60	92
ENSG00000078124.12	513	670	459	660
ENSG00000078140.14	1845	2320	1701	2130
ENSG00000078142.13	267	306	454	486
ENSG00000078177.14	276	511	176	206
ENSG00000078237.7	262	252	311	396
ENSG00000078246.17	595	654	557	547
ENSG00000078269.15	603	634	730	878
ENSG00000078295.17	0	0	0	0
ENSG00000078304.19	869	1219	952	941
ENSG00000078319.9	29	48	34	19
ENSG00000078328.21	0	0	0	0
ENSG00000078369.18	4173	5304	5235	4778
ENSG00000078399.19	200	316	181	195
ENSG00000078401.7	4	2	9	2
ENSG00000078403.17	325	409	414	361
ENSG00000078487.17	43	28	23	27
ENSG00000078549.14	17	49	13	24
ENSG00000078579.9	0	0	0	0
ENSG00000078589.13	0	0	0	0
ENSG00000078596.11	0	0	0	2
ENSG00000078618.21	2180	2785	2716	2731
ENSG00000078668.14	1711	1846	1743	1269
ENSG00000078674.17	1369	1967	1694	1765
ENSG00000078687.17	380	453	652	590
ENSG00000078699.22	502	616	847	746
ENSG00000078725.13	0	0	0	0
ENSG00000078747.15	888	1337	1035	1264
ENSG00000078795.16	24	35	40	61
ENSG00000078804.13	114	146	118	154
ENSG00000078808.18	1996	1682	2476	1770
ENSG00000078814.17	5	6	16	3
ENSG00000078898.7	0	0	0	0
ENSG00000078900.15	415	469	484	341
ENSG00000078902.16	789	629	1220	1258
ENSG00000078967.13	166	191	244	151
ENSG00000079101.16	9	22	5	3
ENSG00000079102.16	45	58	29	21
ENSG00000079112.10	1	2	0	0
ENSG00000079134.12	437	572	687	656
ENSG00000079150.18	56	115	46	92
ENSG00000079156.17	213	300	299	332
ENSG00000079215.14	498	520	524	729
ENSG00000079246.16	4993	6690	4514	4667
ENSG00000079257.8	118	131	115	78
ENSG00000079263.19	0	0	0	1
ENSG00000079277.21	433	425	631	553
ENSG00000079308.19	174	195	109	40
ENSG00000079313.15	760	575	972	732
ENSG00000079332.15	1656	1883	2068	2577
ENSG00000079335.20	101	128	53	118
ENSG00000079337.16	108	55	75	44
ENSG00000079385.22	2	3	1	0
ENSG00000079387.14	495	711	506	549
ENSG00000079393.20	6	3	0	1
ENSG00000079432.7	1014	1178	1135	744
ENSG00000079435.10	74	47	110	81
ENSG00000079459.13	779	924	742	547
ENSG00000079462.7	414	470	347	153
ENSG00000079482.13	67	112	83	130
ENSG00000079557.5	0	0	3	0
ENSG00000079616.13	1376	1399	2401	2095
ENSG00000079689.14	0	0	0	0
ENSG00000079691.18	237	246	261	261
ENSG00000079739.17	768	842	811	571
ENSG00000079785.15	2399	2670	2799	3089
ENSG00000079805.17	2236	2117	3126	2810
ENSG00000079819.19	2456	2862	2035	1825
ENSG00000079841.18	16	21	20	16
ENSG00000079931.15	203	359	289	295
ENSG00000079950.14	843	1053	1240	1425
ENSG00000079974.17	357	401	233	130
ENSG00000079999.14	905	837	901	793
ENSG00000080007.8	0	1	0	1
ENSG00000080031.10	14	5	28	51
ENSG00000080166.16	0	3	2	14
ENSG00000080189.15	823	627	792	408
ENSG00000080200.10	304	524	271	299
ENSG00000080224.17	11	28	5	6
ENSG00000080293.10	0	1	1	0
ENSG00000080298.15	89	215	125	164
ENSG00000080345.18	1301	1998	1346	2053
ENSG00000080371.6	879	1126	1064	1587
ENSG00000080493.17	46	63	66	67
ENSG00000080503.24	819	923	1036	1003
ENSG00000080511.5	1	0	0	0
ENSG00000080546.13	373	611	337	319
ENSG00000080561.13	100	176	66	73
ENSG00000080572.13	1	0	3	1
ENSG00000080573.7	17	18	13	51
ENSG00000080603.17	1680	1808	1309	1222
ENSG00000080608.10	725	687	512	750
ENSG00000080618.16	1	0	0	0
ENSG00000080644.16	35	21	16	15
ENSG00000080709.16	4	2	2	7
ENSG00000080802.18	253	315	351	422
ENSG00000080815.19	539	595	276	301
ENSG00000080819.9	575	600	130	104
ENSG00000080822.17	554	800	777	859
ENSG00000080823.23	155	147	139	139
ENSG00000080824.19	23163	23612	25838	21554
ENSG00000080839.12	475	623	228	328
ENSG00000080845.17	459	572	432	394
ENSG00000080854.15	183	248	246	250
ENSG00000080910.13	0	0	1	0
ENSG00000080947.15	61	130	33	27
ENSG00000080986.13	614	628	680	645
ENSG00000081014.11	219	284	220	262
ENSG00000081019.13	319	440	234	305
ENSG00000081026.19	380	660	260	262
ENSG00000081041.9	3	3	5	4
ENSG00000081051.8	1	0	0	2
ENSG00000081052.13	26	62	50	42
ENSG00000081059.20	245	303	175	138
ENSG00000081087.15	307	388	407	583
ENSG00000081138.14	9	15	5	6
ENSG00000081148.12	7	8	0	0
ENSG00000081154.12	1478	1899	1829	2158
ENSG00000081177.18	403	529	312	266
ENSG00000081181.8	208	238	362	437
ENSG00000081189.16	148	212	97	89
ENSG00000081237.20	2	0	0	0
ENSG00000081248.11	1	1	0	0
ENSG00000081277.13	0	0	0	0
ENSG00000081307.12	557	684	604	637
ENSG00000081320.11	193	312	213	360
ENSG00000081377.17	708	836	546	457
ENSG00000081386.12	317	494	249	360
ENSG00000081479.15	141	318	520	286
ENSG00000081665.14	131	248	133	148
ENSG00000081692.12	1049	744	507	271
ENSG00000081721.12	228	227	320	468
ENSG00000081760.17	504	606	308	244
ENSG00000081791.9	398	519	520	350
ENSG00000081800.9	0	0	0	0
ENSG00000081803.16	143	224	66	39
ENSG00000081818.4	3	10	1	0
ENSG00000081842.18	0	4	1	1
ENSG00000081853.15	0	1	1	1
ENSG00000081870.11	315	400	448	263
ENSG00000081913.14	609	677	563	446
ENSG00000081923.15	36	96	17	8
ENSG00000081985.12	1	1	8	10
ENSG00000082014.16	440	450	528	316
ENSG00000082068.9	520	652	633	527
ENSG00000082074.18	2	0	0	0
ENSG00000082126.18	2	2	0	0
ENSG00000082146.13	332	519	340	214
ENSG00000082153.18	2958	4263	2688	4219
ENSG00000082175.15	105	140	47	67
ENSG00000082196.20	8	20	5	4
ENSG00000082212.13	631	728	459	481
ENSG00000082213.18	550	697	635	674
ENSG00000082258.13	531	843	583	786
ENSG00000082269.16	383	596	325	506
ENSG00000082293.13	18	34	14	4
ENSG00000082397.17	1037	1127	696	463
ENSG00000082438.17	197	233	206	252
ENSG00000082458.12	620	810	674	456
ENSG00000082482.13	8	14	8	3
ENSG00000082497.12	199	319	151	124
ENSG00000082512.15	252	364	220	235
ENSG00000082515.18	369	352	479	473
ENSG00000082516.9	683	791	672	1129
ENSG00000082556.13	4	1	7	9
ENSG00000082641.16	2808	2486	4452	3532
ENSG00000082684.16	61	118	25	8
ENSG00000082701.16	738	1042	503	477
ENSG00000082781.12	666	747	957	637
ENSG00000082805.20	1005	1134	1061	961
ENSG00000082898.17	4799	6709	4539	4748
ENSG00000082929.8	0	0	0	0
ENSG00000082996.19	358	432	288	269
ENSG00000083067.22	2	21	1	0
ENSG00000083093.10	214	271	196	177
ENSG00000083097.14	446	751	411	456
ENSG00000083099.11	585	813	526	535
ENSG00000083123.15	219	404	208	127
ENSG00000083168.11	1167	1373	809	996
ENSG00000083223.18	206	286	131	188
ENSG00000083290.20	2	0	2	1
ENSG00000083307.12	1	0	0	0
ENSG00000083312.17	2661	3886	1974	3189
ENSG00000083444.17	1730	1427	1749	1141
ENSG00000083454.22	48	43	75	129
ENSG00000083457.12	261	230	262	267
ENSG00000083520.15	852	1039	993	1458
ENSG00000083535.16	169	248	179	190
ENSG00000083544.15	144	215	125	109
ENSG00000083622.8	0	0	0	0
ENSG00000083635.8	207	244	92	144
ENSG00000083642.19	586	780	588	690
ENSG00000083720.13	787	1092	960	1392
ENSG00000083750.12	147	167	357	442
ENSG00000083782.8	0	0	0	0
ENSG00000083799.17	317	415	389	508
ENSG00000083807.10	59	66	74	34
ENSG00000083812.12	299	288	294	277
ENSG00000083814.13	30	29	13	32
ENSG00000083817.9	88	127	89	140
ENSG00000083828.16	137	154	63	92
ENSG00000083838.16	180	124	132	79
ENSG00000083844.10	255	377	208	300
ENSG00000083845.9	7503	6434	6749	4677
ENSG00000083857.14	2694	3575	2378	2612
ENSG00000083896.12	1191	1341	979	1151
ENSG00000083937.9	558	713	754	1127
ENSG00000084070.12	615	707	436	296
ENSG00000084072.17	1013	864	1129	1079
ENSG00000084073.9	1053	1062	767	892
ENSG00000084090.13	3008	3447	3879	3821
ENSG00000084092.7	487	507	393	350
ENSG00000084093.18	631	895	555	669
ENSG00000084110.11	6	6	9	2
ENSG00000084112.15	762	964	452	300
ENSG00000084207.18	9578	8708	7209	3066
ENSG00000084234.17	6616	7789	6573	5183
ENSG00000084444.14	312	368	439	428
ENSG00000084453.16	6	19	2	2
ENSG00000084463.8	2464	2869	2340	2829
ENSG00000084623.11	2840	2971	2465	1752
ENSG00000084628.10	26	34	17	43
ENSG00000084636.18	12	10	5	0
ENSG00000084652.16	1720	1751	1319	1384
ENSG00000084674.15	16	0	20	0
ENSG00000084676.15	545	785	667	714
ENSG00000084693.16	1085	1302	632	402
ENSG00000084710.14	262	253	293	221
ENSG00000084731.15	431	430	345	191
ENSG00000084733.11	1740	2054	2065	2673
ENSG00000084734.9	0	0	1	0
ENSG00000084754.12	2025	2382	2898	2939
ENSG00000084764.12	161	228	339	296
ENSG00000084774.14	2816	3230	2490	2536
ENSG00000085063.17	2009	2000	2043	2159
ENSG00000085117.12	80	69	61	24
ENSG00000085185.15	713	843	860	742
ENSG00000085224.22	1294	2110	1365	1757
ENSG00000085231.14	282	281	282	373
ENSG00000085265.11	0	0	0	0
ENSG00000085274.15	249	291	220	301
ENSG00000085276.19	213	357	163	145
ENSG00000085365.18	629	982	693	947
ENSG00000085377.14	656	1087	903	877
ENSG00000085382.12	230	504	341	316
ENSG00000085415.16	873	994	972	1243
ENSG00000085433.15	257	360	291	420
ENSG00000085449.15	576	810	629	577
ENSG00000085465.13	33	20	76	168
ENSG00000085491.17	748	1036	566	565
ENSG00000085511.20	475	585	496	443
ENSG00000085514.16	12	4	27	17
ENSG00000085552.17	39	35	29	15
ENSG00000085563.15	116	118	199	422
ENSG00000085644.14	514	566	585	500
ENSG00000085662.14	1419	1249	1329	953
ENSG00000085719.13	1233	1757	983	1261
ENSG00000085721.13	1158	1323	1239	1709
ENSG00000085733.16	4315	3449	5731	4460
ENSG00000085741.13	143	145	77	58
ENSG00000085760.15	738	774	499	463
ENSG00000085788.14	772	1096	799	812
ENSG00000085831.15	247	299	139	130
ENSG00000085832.17	767	933	734	699
ENSG00000085840.13	663	809	731	715
ENSG00000085871.9	185	181	221	156
ENSG00000085872.15	1485	1484	1151	1237
ENSG00000085978.22	331	394	551	492
ENSG00000085982.13	265	325	284	194
ENSG00000085998.14	719	752	510	251
ENSG00000085999.13	689	745	994	820
ENSG00000086015.22	899	1005	1396	1350
ENSG00000086061.16	3133	3341	1723	2240
ENSG00000086062.12	842	974	1144	1034
ENSG00000086065.14	696	749	714	654
ENSG00000086102.19	651	830	514	544
ENSG00000086159.13	5	8	3	4
ENSG00000086189.10	452	542	618	835
ENSG00000086200.16	470	724	506	837
ENSG00000086205.18	0	3	2	0
ENSG00000086232.13	1854	2475	1885	1713
ENSG00000086288.12	0	0	0	0
ENSG00000086289.12	337	337	116	66
ENSG00000086300.16	298	438	343	290
ENSG00000086475.15	691	912	620	475
ENSG00000086504.17	2023	1183	2015	1377
ENSG00000086506.3	15	15	28	8
ENSG00000086544.3	134	140	112	79
ENSG00000086548.9	0	0	0	0
ENSG00000086570.12	12	13	7	17
ENSG00000086589.12	929	923	914	1141
ENSG00000086598.11	2634	2999	3149	3143
ENSG00000086619.14	237	304	253	271
ENSG00000086666.19	775	951	952	983
ENSG00000086696.11	0	1	0	0
ENSG00000086712.13	636	638	566	848
ENSG00000086717.18	1	2	1	3
ENSG00000086730.17	12	10	9	3
ENSG00000086758.16	6931	8145	5922	5084
ENSG00000086827.9	418	569	482	458
ENSG00000086848.15	242	350	338	355
ENSG00000086967.10	4	3	2	3
ENSG00000086991.13	0	0	0	0
ENSG00000087008.16	120	131	60	33
ENSG00000087053.19	900	1248	1096	1281
ENSG00000087074.8	1076	459	2129	5712
ENSG00000087076.9	34	39	47	28
ENSG00000087077.14	1100	730	1025	915
ENSG00000087085.15	73	53	31	70
ENSG00000087086.15	6578	5171	7687	6487
ENSG00000087087.20	2817	2330	3153	2382
ENSG00000087088.20	980	788	909	488
ENSG00000087095.13	134	205	154	167
ENSG00000087111.21	1213	1108	1411	833
ENSG00000087116.16	335	371	223	97
ENSG00000087128.10	0	0	0	0
ENSG00000087152.15	1387	1343	1348	1145
ENSG00000087157.19	438	405	528	437
ENSG00000087191.13	2256	1517	2581	2145
ENSG00000087206.17	301	316	224	294
ENSG00000087237.12	0	0	0	3
ENSG00000087245.13	215	359	105	63
ENSG00000087250.9	0	0	0	0
ENSG00000087253.13	273	411	257	249
ENSG00000087258.15	10	8	32	63
ENSG00000087263.17	639	712	719	972
ENSG00000087266.17	599	589	473	522
ENSG00000087269.16	1781	1455	1885	2271
ENSG00000087274.17	1776	2224	2429	1953
ENSG00000087299.12	334	412	336	302
ENSG00000087301.9	291	622	267	253
ENSG00000087302.9	1179	1427	1387	1434
ENSG00000087303.18	268	423	341	367
ENSG00000087338.5	519	819	568	462
ENSG00000087365.16	6367	5519	8496	8465
ENSG00000087448.11	541	750	794	917
ENSG00000087460.25	11883	19927	12540	9879
ENSG00000087470.18	1415	1796	1641	1568
ENSG00000087494.16	27	19	31	63
ENSG00000087495.17	28	35	11	5
ENSG00000087502.18	574	755	642	631
ENSG00000087510.7	231	257	290	211
ENSG00000087586.17	1466	1620	1590	1620
ENSG00000087589.16	8	2	11	14
ENSG00000087842.11	145	207	97	34
ENSG00000087884.14	164	116	158	112
ENSG00000087903.13	177	156	214	208
ENSG00000087995.16	376	445	624	637
ENSG00000088002.12	9	5	13	8
ENSG00000088035.18	245	376	234	163
ENSG00000088038.19	2077	2053	2414	1683
ENSG00000088053.11	6	11	3	5
ENSG00000088179.9	216	393	248	325
ENSG00000088205.13	2230	2325	2013	3085
ENSG00000088247.17	7232	6039	7251	6558
ENSG00000088256.9	1465	1172	1793	1491
ENSG00000088280.19	265	336	158	100
ENSG00000088298.13	172	150	196	173
ENSG00000088305.18	770	958	459	227
ENSG00000088320.4	0	1	1	0
ENSG00000088325.16	4215	5159	4449	4915
ENSG00000088340.17	48	56	52	33
ENSG00000088356.6	570	373	767	866
ENSG00000088367.23	698	790	342	187
ENSG00000088386.17	7	24	23	33
ENSG00000088387.19	369	420	438	493
ENSG00000088448.14	262	298	299	349
ENSG00000088451.11	121	165	126	146
ENSG00000088538.13	314	454	356	305
ENSG00000088543.15	6	8	3	1
ENSG00000088682.14	441	472	409	308
ENSG00000088726.16	4	6	18	58
ENSG00000088727.12	39	36	30	77
ENSG00000088756.12	67	171	65	39
ENSG00000088766.12	672	798	658	609
ENSG00000088782.5	0	0	0	0
ENSG00000088808.18	415	409	400	300
ENSG00000088812.18	1066	1399	537	455
ENSG00000088826.18	172	157	191	231
ENSG00000088827.12	10	6	7	17
ENSG00000088832.17	3116	3876	2874	2470
ENSG00000088833.17	1208	957	1299	1061
ENSG00000088836.14	115	118	141	74
ENSG00000088854.12	188	289	281	267
ENSG00000088876.13	365	375	223	259
ENSG00000088881.21	213	287	135	81
ENSG00000088882.8	1	3	0	2
ENSG00000088888.18	1854	2175	1489	1012
ENSG00000088899.15	262	222	286	236
ENSG00000088926.14	0	2	0	3
ENSG00000088930.8	1467	1680	1198	1277
ENSG00000088970.16	230	213	175	163
ENSG00000088986.11	2269	1891	1977	1587
ENSG00000088992.18	84	98	120	115
ENSG00000089006.16	1309	1586	1462	1607
ENSG00000089009.15	18579	17254	21081	16125
ENSG00000089012.14	0	0	0	0
ENSG00000089022.14	742	894	829	784
ENSG00000089041.17	0	1	0	0
ENSG00000089048.14	544	572	476	459
ENSG00000089050.16	307	487	202	178
ENSG00000089053.13	2362	2840	2695	2192
ENSG00000089057.15	1226	1546	1576	1367
ENSG00000089060.11	282	252	257	115
ENSG00000089063.15	1312	1761	1185	1121
ENSG00000089091.16	22	47	37	38
ENSG00000089094.19	957	926	832	646
ENSG00000089101.19	2	1	2	3
ENSG00000089116.4	3	4	5	8
ENSG00000089123.16	105	110	107	137
ENSG00000089127.13	2	1	0	0
ENSG00000089154.11	3918	3588	4529	3585
ENSG00000089157.16	18087	19114	20171	16663
ENSG00000089159.16	1401	1418	1327	1299
ENSG00000089163.4	22	18	35	29
ENSG00000089169.15	0	0	0	1
ENSG00000089177.18	228	264	225	162
ENSG00000089195.15	561	448	510	698
ENSG00000089199.10	4	2	12	47
ENSG00000089220.5	4123	3319	3675	2541
ENSG00000089225.20	21	41	27	12
ENSG00000089234.16	442	496	419	511
ENSG00000089248.7	1161	909	1578	1087
ENSG00000089250.19	7	18	15	11
ENSG00000089280.19	9463	7522	9912	8116
ENSG00000089289.16	595	528	772	573
ENSG00000089327.15	394	489	466	397
ENSG00000089335.21	361	561	211	286
ENSG00000089351.14	676	791	345	156
ENSG00000089356.18	1	1	0	0
ENSG00000089472.16	0	0	0	1
ENSG00000089486.17	1433	1246	1719	1995
ENSG00000089505.17	10	6	14	2
ENSG00000089558.9	4	10	3	5
ENSG00000089597.18	7907	8807	11875	10756
ENSG00000089639.11	160	156	117	69
ENSG00000089682.16	300	372	147	134
ENSG00000089685.15	3232	2703	4977	3994
ENSG00000089692.9	23	18	6	5
ENSG00000089693.10	3486	2676	3791	2853
ENSG00000089723.10	103	170	98	60
ENSG00000089737.17	3047	3176	2702	2870
ENSG00000089775.11	117	215	90	75
ENSG00000089818.18	444	525	475	478
ENSG00000089820.16	25	16	16	23
ENSG00000089847.12	5	17	3	1
ENSG00000089876.12	479	662	520	379
ENSG00000089902.10	646	992	500	694
ENSG00000089916.18	488	758	305	523
ENSG00000090006.18	425	503	389	156
ENSG00000090013.11	196	180	177	129
ENSG00000090020.11	640	592	728	641
ENSG00000090054.15	1231	1722	1803	2159
ENSG00000090060.18	2956	3924	2336	2543
ENSG00000090061.17	888	1126	885	1058
ENSG00000090097.21	226	205	203	160
ENSG00000090104.12	0	0	0	0
ENSG00000090238.12	127	122	260	191
ENSG00000090263.16	193	229	225	173
ENSG00000090266.13	540	518	688	532
ENSG00000090273.14	3667	2273	2580	2304
ENSG00000090316.16	1261	1101	1230	1147
ENSG00000090339.9	40	49	127	142
ENSG00000090372.15	2300	2032	1670	1144
ENSG00000090376.11	2	3	12	9
ENSG00000090382.7	2	3	1	0
ENSG00000090402.8	0	0	0	0
ENSG00000090432.7	512	464	555	521
ENSG00000090447.12	410	373	342	300
ENSG00000090470.15	385	346	392	305
ENSG00000090487.11	636	685	840	628
ENSG00000090512.12	0	2	0	0
ENSG00000090520.11	918	794	1455	1661
ENSG00000090530.10	137	135	483	396
ENSG00000090534.20	12	16	2	0
ENSG00000090539.15	83	76	99	81
ENSG00000090554.13	46	33	12	9
ENSG00000090565.17	964	822	581	427
ENSG00000090581.10	446	420	418	296
ENSG00000090612.22	320	479	503	726
ENSG00000090615.15	1447	1095	1673	1457
ENSG00000090621.14	3665	3849	3793	4164
ENSG00000090659.18	0	0	0	0
ENSG00000090661.12	212	243	291	175
ENSG00000090674.16	216	148	391	352
ENSG00000090686.16	1189	1504	1423	1198
ENSG00000090776.6	462	396	480	459
ENSG00000090857.14	880	1181	746	769
ENSG00000090861.16	2841	2692	5787	4283
ENSG00000090863.12	1413	1731	1190	1113
ENSG00000090889.12	1199	1512	2093	2037
ENSG00000090905.19	904	1215	813	1067
ENSG00000090924.15	584	761	254	155
ENSG00000090932.11	84	82	111	91
ENSG00000090971.5	388	270	688	367
ENSG00000090975.12	233	182	241	262
ENSG00000090989.18	363	545	426	450
ENSG00000091009.8	685	840	583	862
ENSG00000091010.6	4	2	2	4
ENSG00000091039.17	890	1365	788	1045
ENSG00000091073.19	129	152	156	136
ENSG00000091106.19	9	8	61	65
ENSG00000091127.14	456	535	331	344
ENSG00000091128.13	0	0	0	0
ENSG00000091129.21	203	352	260	297
ENSG00000091136.14	1126	1456	1096	746
ENSG00000091137.14	0	6	0	12
ENSG00000091138.13	0	0	0	0
ENSG00000091140.14	1303	1509	1074	799
ENSG00000091157.13	254	425	186	200
ENSG00000091164.13	603	657	721	874
ENSG00000091181.19	0	0	1	3
ENSG00000091262.15	93	141	98	42
ENSG00000091317.8	1035	1455	896	903
ENSG00000091409.15	402	549	862	1016
ENSG00000091428.18	118	133	122	95
ENSG00000091436.17	559	727	599	738
ENSG00000091482.8	5	2	2	0
ENSG00000091483.7	466	547	472	390
ENSG00000091490.11	384	482	370	297
ENSG00000091513.16	16	8	23	10
ENSG00000091527.15	2503	2743	2377	3360
ENSG00000091536.19	3	11	5	7
ENSG00000091542.9	1172	1192	1136	1063
ENSG00000091583.11	13	0	20	0
ENSG00000091592.16	16	13	2	2
ENSG00000091622.16	56	61	46	35
ENSG00000091640.8	234	242	588	453
ENSG00000091651.9	722	747	885	1131
ENSG00000091656.19	387	691	193	213
ENSG00000091664.9	0	0	0	0
ENSG00000091704.10	0	0	3	0
ENSG00000091732.17	343	401	334	352
ENSG00000091831.23	5	13	3	7
ENSG00000091844.8	7	23	11	42
ENSG00000091879.14	3	0	7	95
ENSG00000091947.10	430	430	729	389
ENSG00000091972.18	1	1	1	4
ENSG00000091986.15	141	209	37	53
ENSG00000092009.10	0	0	0	0
ENSG00000092010.15	537	710	631	305
ENSG00000092020.10	238	237	172	175
ENSG00000092036.18	250	357	325	148
ENSG00000092051.17	6	9	7	1
ENSG00000092054.13	1	1	0	0
ENSG00000092067.5	0	0	0	0
ENSG00000092068.20	508	480	316	187
ENSG00000092094.11	324	385	647	554
ENSG00000092096.17	83	73	153	55
ENSG00000092098.17	408	355	396	342
ENSG00000092108.21	414	555	501	653
ENSG00000092140.16	396	498	523	853
ENSG00000092148.13	1456	1997	866	1273
ENSG00000092199.17	10233	9212	5239	4062
ENSG00000092200.12	0	0	1	1
ENSG00000092201.10	3571	4313	4688	4844
ENSG00000092203.15	890	890	955	1201
ENSG00000092208.17	272	316	196	225
ENSG00000092295.12	25	19	10	11
ENSG00000092330.18	200	258	257	194
ENSG00000092345.14	0	0	0	0
ENSG00000092377.15	0	0	0	0
ENSG00000092421.16	212	474	165	381
ENSG00000092439.16	541	811	443	423
ENSG00000092445.12	522	486	320	183
ENSG00000092470.12	301	460	564	521
ENSG00000092529.25	13	19	11	12
ENSG00000092531.10	470	520	705	525
ENSG00000092607.15	2	2	7	25
ENSG00000092621.12	4004	3602	6642	3871
ENSG00000092758.18	492	552	211	72
ENSG00000092820.18	3059	2470	3466	4147
ENSG00000092841.19	5233	3956	8010	5828
ENSG00000092847.13	1113	1304	1477	1027
ENSG00000092850.12	1	13	2	0
ENSG00000092853.14	1130	1351	1088	1191
ENSG00000092871.17	260	325	259	212
ENSG00000092929.11	15	6	8	8
ENSG00000092931.11	1881	1688	1420	975
ENSG00000092964.18	286	390	284	131
ENSG00000092969.12	52	63	8	50
ENSG00000092978.11	213	246	228	282
ENSG00000093000.19	1667	1902	1371	1556
ENSG00000093009.11	1066	1143	1352	850
ENSG00000093010.14	568	528	967	616
ENSG00000093072.18	0	2	0	1
ENSG00000093100.13	243	270	217	237
ENSG00000093134.15	0	0	0	0
[truncated: 58,671 more rows]

## Sheet: Table S7B. SRSF1_KD_DGE_DESeq2
Supplemental Table S7B: Differential gene expression analysis with DESeq2 upon SRSF1 knockdown in HEK293 cells
gene_id	baseMean	log2FoldChange	lfcSE	stat	pvalue	padj
ENSG00000000003.15	601.844	-1.43945	0.289352	-4.97475	6.53e-07	7.64e-05
ENSG00000000419.12	578.916	0.0408251	0.272363	0.149892	0.88085	0.955485
ENSG00000000457.14	208.318	0.0854254	0.357218	0.239141	0.810996	0.923306
ENSG00000000460.17	373.225	-0.359604	0.302181	-1.19003	0.234034	0.525747
ENSG00000001036.14	883.681	0.0315928	0.272073	0.116119	0.907558	0.965283
ENSG00000001084.13	683.756	-0.339952	0.274332	-1.2392	0.21527	0.506027
ENSG00000001167.14	643.692	-0.844973	0.288267	-2.93122	0.00337633	0.0422277
ENSG00000001460.18	252.443	0.275626	0.315634	0.873246	0.382529	0.668656
ENSG00000001461.17	836.141	0.921869	0.260572	3.53786	0.000403	0.00961135
ENSG00000001497.16	1313.13	-0.11636	0.270595	-0.430015	0.667185	0.851548
ENSG00000001561.7	385.198	0.151776	0.288866	0.525418	0.599292	0.814644
ENSG00000001617.12	186.938	-0.25231	0.373386	-0.675734	0.49921	0.750327
ENSG00000001626.16	16.66	-1.11539	0.898172	-1.24184	0.214295	0.505107
ENSG00000001629.10	471.679	0.240502	0.307048	0.783271	0.433468	0.707592
ENSG00000001630.17	796.779	-0.00632169	0.257337	-0.0245658	0.980401	0.993703
ENSG00000001631.15	338.822	-0.446151	0.306894	-1.45376	0.146012	0.410585
ENSG00000002016.18	253.228	0.454321	0.319307	1.42283	0.154784	0.424874
ENSG00000002330.13	579.636	0.687604	0.296242	2.32109	0.0202819	0.132599
ENSG00000002549.12	770.241	-0.236164	0.273798	-0.862549	0.388386	0.673657
ENSG00000002586.20	572.532	-0.170696	0.295647	-0.577364	0.563694	0.793755
ENSG00000002586.20_PAR_Y	572.532	-0.170696	0.295647	-0.577364	0.563694	0.793755
ENSG00000002587.10	13.9794	0.244692	0.965261	0.253498	0.799883	0.917776
ENSG00000002745.13	12.875	-1.02939	1.01432	-1.01486	0.310175	NA
ENSG00000002746.15	58.0384	-0.549247	0.534989	-1.02665	0.304584	0.597452
ENSG00000002822.15	483.854	-0.0214242	0.303469	-0.0705976	0.943718	0.980499
ENSG00000002834.18	1545.94	-0.123299	0.2724	-0.452638	0.650809	0.844055
ENSG00000002919.14	380.575	0.660673	0.305121	2.16528	0.0303662	0.170149
ENSG00000003056.8	1892.77	0.486404	0.251978	1.93034	0.0535645	0.236821
ENSG00000003096.14	215.054	-1.13761	0.331767	-3.42894	0.000606	0.0127359
ENSG00000003137.8	104.814	0.429222	0.434868	0.987017	0.323634	0.617951
ENSG00000003147.19	65.8732	0.638123	0.502271	1.27047	0.203915	0.494108
ENSG00000003249.14	668.146	0.587476	0.265386	2.21367	0.0268517	0.15662
ENSG00000003393.15	605.432	0.492913	0.283305	1.73987	0.0818825	0.301061
ENSG00000003400.15	111.03	0.187273	0.419885	0.446011	0.655589	0.846006
ENSG00000003402.20	322.769	7.98e-05	0.305316	0.000261	0.999792	0.999942
ENSG00000003436.16	146.211	2.16422	0.459469	4.71027	2.47e-06	0.000231
ENSG00000003509.16	262.47	0.376972	0.33691	1.11891	0.263179	0.555377
ENSG00000003756.17	1351.63	0.0264628	0.256937	0.102993	0.917968	0.969722
ENSG00000003987.14	33.9917	-0.27314	0.684103	-0.399268	0.689696	0.864452
ENSG00000003989.18	914.822	-0.481054	0.256841	-1.87297	0.0610726	0.255523
ENSG00000004059.11	1625.43	0.138678	0.269403	0.514762	0.60672	0.819967
ENSG00000004139.14	485.74	0.281305	0.275255	1.02198	0.306791	0.599537
ENSG00000004142.12	1346.62	-0.0754022	0.252674	-0.298417	0.765385	0.900844
ENSG00000004399.12	630.635	-1.46509	0.320802	-4.56696	4.95e-06	0.000404
ENSG00000004455.17	3069.76	-0.25279	0.255344	-0.989998	0.322175	0.617333
ENSG00000004478.8	3905.05	0.0621877	0.278865	0.223003	0.823533	0.929541
ENSG00000004487.17	2650.33	-0.00457813	0.238141	-0.0192245	0.984662	0.995339
ENSG00000004534.15	842.772	-0.406853	0.259642	-1.56697	0.117121	0.365005
ENSG00000004660.15	448.88	0.178827	0.319402	0.559879	0.575562	0.800718
ENSG00000004700.16	1251	-0.0648411	0.259939	-0.249447	0.803015	0.919326
ENSG00000004766.17	257.092	0.922248	0.313875	2.93827	0.00330052	0.0415499
ENSG00000004776.13	3.16083	-0.467364	1.89816	-0.24622	0.805512	NA
ENSG00000004777.18	199.593	0.580117	0.395496	1.46681	0.142428	0.406449
ENSG00000004779.10	710.393	-0.267116	0.273906	-0.975213	0.329455	0.622646
ENSG00000004799.8	50.6095	-0.733332	0.619052	-1.1846	0.236174	0.527701
ENSG00000004838.14	8.13058	-0.845159	1.24321	-0.679822	0.496617	NA
ENSG00000004848.8	33.8372	1.15735	0.651746	1.77576	0.0757721	0.289523
ENSG00000004864.14	573.002	0.423652	0.281039	1.50745	0.131696	0.389501
ENSG00000004866.20	266.02	0.74863	0.325048	2.30314	0.021271	0.13639
ENSG00000004897.12	1688.53	-0.251262	0.254827	-0.986011	0.324128	0.618314
ENSG00000004939.15	2.53847	0.145489	2.13825	0.0680409	0.945753	NA
ENSG00000004948.15	3.89627	1.66946	1.82475	0.914894	0.360247	NA
ENSG00000004961.15	290.31	0.719024	0.34085	2.1095	0.0349012	0.18622
ENSG00000004975.12	866.929	0.0109754	0.287962	0.0381139	0.969597	0.989722
ENSG00000005007.13	2824.39	0.23108	0.244914	0.943515	0.345418	0.637258
ENSG00000005020.13	511.807	-1.13161	0.324403	-3.48827	0.000486	0.0110608
ENSG00000005022.6	4257.17	-0.526028	0.256607	-2.04994	0.0403706	0.201733
ENSG00000005059.16	391.483	0.465831	0.28786	1.61825	0.105608	0.343423
ENSG00000005073.6	140.543	-0.221208	0.376632	-0.587333	0.55698	0.790305
ENSG00000005075.15	360.488	0.116942	0.380236	0.307551	0.758424	0.899124
ENSG00000005100.13	991.983	0.219828	0.311504	0.705697	0.480377	0.73955
ENSG00000005102.14	6.50232	-1.6868	1.57853	-1.06859	0.285256	NA
ENSG00000005108.16	2.44829	-3.03067	2.80657	-1.07985	0.280209	NA
ENSG00000005156.12	480.157	-0.603692	0.286967	-2.1037	0.035405	0.187723
ENSG00000005175.10	840.575	-0.223035	0.263069	-0.84782	0.396538	0.679576
ENSG00000005187.12	93.1901	-0.499283	0.443893	-1.12478	0.260681	0.553075
ENSG00000005189.19	153.885	-0.388442	0.364658	-1.06522	0.286775	0.578807
ENSG00000005194.15	839.35	0.348743	0.266559	1.30831	0.190767	0.477028
ENSG00000005206.17	675.909	-0.137337	0.31598	-0.43464	0.663824	0.849828
ENSG00000005238.19	52.6914	-0.0325925	0.534598	-0.0609664	0.951386	0.982985
ENSG00000005243.10	5.03182	0.768869	1.52378	0.504581	0.613853	NA
ENSG00000005249.13	219.214	-1.22123	0.356491	-3.4257	0.000613	0.0128706
ENSG00000005302.19	328.191	0.448925	0.296146	1.51589	0.129547	0.386302
ENSG00000005339.15	3230.81	0.0473095	0.246699	0.19177	0.847922	0.939758
ENSG00000005436.14	480.709	-0.0308862	0.276841	-0.111566	0.911167	0.966781
ENSG00000005448.17	267.566	-0.685564	0.383319	-1.78849	0.0736963	0.285305
ENSG00000005469.12	137.26	-0.406983	0.385683	-1.05523	0.291321	0.583949
ENSG00000005471.18	18.0678	-0.816171	0.87826	-0.929305	0.352731	0.643934
ENSG00000005483.21	841.915	0.324832	0.267156	1.21589	0.224027	0.515602
ENSG00000005486.17	1094.7	1.63507	0.259804	6.29347	3.1e-10	1.15e-07
ENSG00000005513.10	92.1242	-1.34648	0.445963	-3.01926	0.00253395	0.0348155
ENSG00000005700.15	672.036	-1.34	0.283381	-4.72859	2.26e-06	0.000215
ENSG00000005801.18	931.707	0.366187	0.275987	1.32683	0.184565	0.468223
ENSG00000005810.18	877.425	-0.216909	0.263205	-0.824107	0.409879	0.689453
ENSG00000005812.11	693.844	0.268969	0.283994	0.947096	0.34359	0.636226
ENSG00000005844.18	2.95659	-0.320524	1.95235	-0.164173	0.869595	NA
ENSG00000005882.12	517.413	-0.112459	0.356767	-0.315216	0.752598	0.896437
ENSG00000005884.18	158.895	0.243872	0.375134	0.650094	0.515632	0.761767
ENSG00000005889.15	1120.14	-0.306265	0.26453	-1.15777	0.246958	0.539584
ENSG00000005893.16	1581.51	0.0374813	0.270974	0.138321	0.889987	0.958745
ENSG00000005961.19	114.131	-0.629188	0.471884	-1.33335	0.182415	0.464942
ENSG00000006007.12	1174.56	0.639334	0.249844	2.55893	0.0104995	0.0880035
ENSG00000006015.17	326.196	-0.827472	0.462892	-1.78761	0.0738385	0.285418
ENSG00000006016.11	157.972	0.22306	0.418267	0.533295	0.593829	0.812884
ENSG00000006025.12	124.511	-0.495142	0.443617	-1.11615	0.26436	0.556554
ENSG00000006042.12	565.22	-0.0778373	0.294158	-0.264611	0.791309	0.913134
ENSG00000006047.13	45.7878	-0.399171	0.68435	-0.583285	0.559701	0.79186
ENSG00000006062.17	326.955	1.38863	0.348876	3.98029	6.88e-05	0.00268879
ENSG00000006071.15	35.099	0.0328695	0.649099	0.0506386	0.959614	0.985356
ENSG00000006118.14	933.092	-0.158212	0.276392	-0.572417	0.567039	0.795731
ENSG00000006125.18	3498.82	0.300548	0.243964	1.23194	0.217973	0.509756
ENSG00000006128.12	22.8052	2.12133	0.88576	2.39493	0.0166236	0.116535
ENSG00000006194.10	992.975	0.415303	0.276801	1.50036	0.13352	0.393084
ENSG00000006210.7	20.7169	-1.62661	0.84287	-1.92984	0.0536261	0.236821
ENSG00000006282.21	293.994	-0.672636	0.397542	-1.69199	0.0906486	0.316375
ENSG00000006283.18	37.8528	-3.20093	0.728624	-4.39312	1.12e-05	0.000723
ENSG00000006327.14	645.156	1.93906	1.12289	1.72684	0.0841962	0.305138
ENSG00000006377.11	64.9821	-0.499205	0.490488	-1.01777	0.308786	0.60181
ENSG00000006432.15	253.957	0.306353	0.335956	0.911883	0.36183	0.652548
ENSG00000006451.8	790.855	0.432481	0.286098	1.51165	0.130622	0.388213
ENSG00000006453.14	870.946	0.360949	0.260746	1.3843	0.166268	0.44173
ENSG00000006459.11	204.518	-0.426804	0.370949	-1.15057	0.249908	0.542592
ENSG00000006468.14	52.653	0.669511	0.582919	1.14855	0.250742	0.543301
ENSG00000006530.18	530.771	-0.574928	0.273446	-2.10253	0.0355069	0.188132
ENSG00000006534.16	26.5189	-1.51899	0.737783	-2.05886	0.0395075	0.199719
ENSG00000006576.16	573.234	0.375489	0.294321	1.27578	0.202033	0.492553
ENSG00000006607.14	1075.45	-0.0271139	0.26037	-0.104136	0.917061	0.969303
ENSG00000006611.16	81.3892	-0.334311	0.5063	-0.660302	0.50906	0.757137
ENSG00000006625.18	863.411	-0.0252118	0.269014	-0.093719	0.925332	0.972761
ENSG00000006634.8	336.401	-0.354142	0.297858	-1.18896	0.234454	0.526255
ENSG00000006638.13	45.4446	-0.647659	0.631191	-1.02609	0.30485	0.597731
ENSG00000006652.14	1088.33	1.93568	0.363207	5.3294	9.85e-08	1.61e-05
ENSG00000006695.12	200.958	-0.0251451	0.347585	-0.0723425	0.942329	0.980097
ENSG00000006704.10	300.802	-0.193005	0.309118	-0.624373	0.532383	0.774097
ENSG00000006712.15	979.333	0.35074	0.295907	1.1853	0.235897	0.527571
ENSG00000006715.16	603.065	0.476036	0.273674	1.73942	0.0819601	0.301201
ENSG00000006740.17	270.963	0.382281	0.308291	1.24	0.214976	0.50585
ENSG00000006744.19	1441.41	0.0042392	0.258152	0.0164213	0.986898	0.996009
ENSG00000006747.15	39.5207	-0.488776	0.633364	-0.771713	0.440284	0.71275
ENSG00000006756.16	27.4546	-1.37264	0.712367	-1.92688	0.0539952	0.237691
ENSG00000006757.12	140.642	-0.354526	0.382114	-0.927801	0.353511	0.644545
ENSG00000006831.10	2296.62	0.742991	0.253286	2.93341	0.00335258	0.0419999
ENSG00000006837.12	10.9722	0.801848	1.11186	0.721178	0.4708	NA
ENSG00000007047.15	406.051	-0.0401893	0.2982	-0.134773	0.892791	0.959467
ENSG00000007080.11	916.246	0.358143	0.364926	0.981413	0.326389	0.620097
ENSG00000007168.13	1927.18	0.431088	0.249515	1.7277	0.0840415	0.304796
ENSG00000007171.18	62.2249	-1.18115	0.560566	-2.10706	0.0351121	0.187084
ENSG00000007202.15	2171.33	-0.921912	0.243432	-3.78714	0.000152	0.00480453
ENSG00000007237.18	186.493	-0.863188	0.38843	-2.22225	0.0262662	0.154723
ENSG00000007255.10	72.2105	-0.17926	0.487606	-0.367634	0.713146	0.877345
ENSG00000007264.15	14.222	-0.395919	0.969504	-0.408373	0.683	0.860919
ENSG00000007314.12	16.7414	-1.56961	0.917096	-1.71151	0.0869878	0.30994
ENSG00000007341.19	210.815	0.325626	0.329875	0.987119	0.323584	0.617951
ENSG00000007350.17	8.70584	-0.742043	1.44336	-0.514108	0.607176	NA
ENSG00000007372.23	652.248	0.0186386	0.278891	0.0668311	0.946716	0.980935
ENSG00000007376.8	932.168	-0.228104	0.356372	-0.640073	0.522125	0.767481
ENSG00000007384.15	328.042	-0.0466825	0.341137	-0.136844	0.891154	0.958747
ENSG00000007392.16	978.361	-0.197097	0.252178	-0.781579	0.434462	0.70815
ENSG00000007402.11	64.9962	0.600704	0.493571	1.21706	0.223583	0.515056
ENSG00000007516.14	64.59	-0.630313	0.488625	-1.28997	0.19706	0.485887
ENSG00000007520.4	809.533	-0.328097	0.343729	-0.954523	0.339819	0.632543
ENSG00000007541.17	1054.19	0.0971229	0.312928	0.310368	0.756281	0.898181
ENSG00000007545.16	1050.92	-0.0405216	0.251694	-0.160995	0.872097	0.950369
ENSG00000007866.21	296.605	-0.0428223	0.30482	-0.140484	0.888278	0.95833
ENSG00000007923.16	1546.24	0.214594	0.2542	0.844195	0.39856	0.681331
ENSG00000007944.15	204.645	-0.739335	0.353788	-2.08977	0.0366386	0.191458
ENSG00000007968.7	771.86	0.977768	0.262571	3.72383	0.000196	0.00583531
ENSG00000008018.9	2134.44	0.0632163	0.242594	0.260585	0.794413	0.91451
ENSG00000008056.14	19.163	1.38137	0.851471	1.62233	0.104733	0.342214
ENSG00000008083.14	829.376	0.166569	0.263709	0.631639	0.527623	0.771019
ENSG00000008086.13	52.1363	-0.809325	0.547198	-1.47903	0.139131	0.401412
ENSG00000008118.10	3.63773	-0.331221	1.85849	-0.17822	0.85855	NA
ENSG00000008128.23	520.836	-0.0242429	0.336206	-0.0721072	0.942517	0.980119
ENSG00000008130.15	1688.36	0.227038	0.248555	0.913433	0.361015	0.651725
ENSG00000008226.20	28.9575	0.0600299	0.677126	0.088654	0.929357	0.974387
ENSG00000008256.16	816.061	0.229471	0.271425	0.845431	0.39787	0.680707
ENSG00000008277.14	186.471	0.351941	0.363608	0.967914	0.333087	0.625871
ENSG00000008282.8	452.554	-1.69483	0.285519	-5.93598	2.92e-09	7.93e-07
ENSG00000008283.16	224.088	0.803336	0.341513	2.35228	0.0186586	0.125737
ENSG00000008294.21	2542.27	0.328658	0.300633	1.09322	0.274297	0.566808
ENSG00000008300.17	72.446	0.433719	0.519283	0.835226	0.40359	0.684329
ENSG00000008311.15	430.323	0.152532	0.32748	0.465777	0.641375	0.839045
ENSG00000008324.11	173.632	0.145278	0.347508	0.418056	0.675906	0.856779
ENSG00000008382.15	135.828	-0.440197	0.49581	-0.887834	0.37463	0.662502
ENSG00000008394.13	284.882	-0.67058	0.316815	-2.11663	0.0342915	0.184458
ENSG00000008405.12	499.68	-0.253397	0.319628	-0.792786	0.427903	0.703299
ENSG00000008441.16	313.928	-1.00169	0.319481	-3.13537	0.00171638	0.0266962
ENSG00000008513.16	203.206	-0.0773931	0.338914	-0.228356	0.819369	0.927534
ENSG00000008516.17	46.6813	-0.867119	0.596996	-1.45247	0.146371	0.4113
ENSG00000008517.17	43.4641	0.344471	0.621286	0.554448	0.579272	0.803864
ENSG00000008710.20	3143.94	0.0399076	0.271152	0.147178	0.882992	0.95628
ENSG00000008735.14	535.062	1.00049	0.322817	3.09926	0.00194005	0.0291603
ENSG00000008838.20	2469.96	0.669605	0.249449	2.68433	0.00726754	0.069545
ENSG00000008853.17	258.742	-0.192745	0.322398	-0.597848	0.549942	0.785793
ENSG00000008869.12	703.485	0.0707756	0.282272	0.250735	0.802019	0.919116
ENSG00000008952.17	1123.63	0.179284	0.259796	0.690093	0.490136	0.745994
ENSG00000008988.9	3099.29	0.195496	0.252663	0.773741	0.439084	0.711953
ENSG00000009307.16	10617.4	0.248378	0.245517	1.01165	0.311704	0.604937
ENSG00000009335.18	1741.69	-0.23852	0.245169	-0.972881	0.330612	0.623788
ENSG00000009413.16	513.32	-0.443203	0.306877	-1.44424	0.148672	0.415222
ENSG00000009694.13	4.11939	0.920195	1.74747	0.526586	0.598481	NA
ENSG00000009709.12	213.858	1.29713	0.34221	3.79045	0.00015	0.00476052
ENSG00000009724.17	34.4997	-0.0297871	0.635839	-0.0468469	0.962635	0.986857
ENSG00000009780.15	98.9831	-0.285118	0.418707	-0.680949	0.495904	0.749087
ENSG00000009790.15	20.1874	-0.621935	0.806043	-0.771589	0.440358	0.71275
ENSG00000009830.11	466.815	-0.139356	0.301534	-0.462159	0.643967	0.840214
ENSG00000009844.16	1094.45	0.128214	0.251911	0.508965	0.610777	0.821309
ENSG00000009950.16	124.51	0.472628	0.457996	1.03195	0.302097	0.594588
ENSG00000009954.11	1946.99	-0.193068	0.249577	-0.77358	0.439179	0.711953
ENSG00000010017.13	755.308	-0.0429365	0.291137	-0.147479	0.882754	0.956254
ENSG00000010030.14	5.43949	1.85984	1.53869	1.20872	0.226772	NA
ENSG00000010072.16	565.638	-0.0508802	0.285699	-0.17809	0.858652	0.944181
ENSG00000010165.20	557.451	-0.369509	0.295327	-1.25119	0.210866	0.50127
ENSG00000010219.13	153.856	-0.279491	0.375953	-0.743422	0.457226	0.724353
ENSG00000010244.18	2789.64	-0.316646	0.245948	-1.28745	0.197936	0.487179
ENSG00000010256.11	2240.55	0.436371	0.241827	1.80447	0.0711571	0.27984
ENSG00000010270.13	461.03	-0.0647996	0.2816	-0.230112	0.818005	0.926812
ENSG00000010278.14	804.048	0.255093	0.268309	0.950743	0.341735	0.634149
ENSG00000010292.13	3030.06	-1.18146	0.275787	-4.28396	1.84e-05	0.00102194
ENSG00000010295.19	523.72	-0.0171216	0.330359	-0.0518273	0.958666	0.985081
ENSG00000010310.9	37.9731	-0.219863	0.678221	-0.324175	0.745805	0.894566
ENSG00000010318.21	37.6664	-1.41725	0.623998	-2.27124	0.0231326	0.143831
ENSG00000010319.7	45.2623	-0.414338	0.69621	-0.595133	0.551754	0.786608
ENSG00000010322.16	1480.29	-0.0353933	0.277879	-0.127369	0.898648	0.96216
ENSG00000010327.10	30.3041	-2.27443	0.791447	-2.87376	0.00405616	0.0477439
ENSG00000010361.14	255.632	-0.897005	0.329908	-2.71896	0.00654882	0.0651648
ENSG00000010379.16	6.857	-0.879303	1.37323	-0.640316	0.521967	NA
ENSG00000010404.18	1491.98	0.150061	0.26497	0.56633	0.57117	0.798236
ENSG00000010539.11	675.728	-0.272299	0.278653	-0.977196	0.328472	0.621959
ENSG00000010626.15	22.8936	-1.55007	0.782104	-1.98193	0.0474876	0.221424
ENSG00000010671.16	4.37727	1.9332	1.73192	1.11622	0.264329	NA
ENSG00000010704.18	3.07826	1.20393	1.96947	0.611296	0.541003	NA
ENSG00000010803.16	502.66	-0.184515	0.293979	-0.627647	0.530235	0.772899
ENSG00000010810.17	874.308	-0.129002	0.255143	-0.505605	0.613134	0.822911
ENSG00000010818.10	318.561	-0.214373	0.328799	-0.65199	0.514408	0.76106
ENSG00000011007.12	1873.43	0.778377	0.261753	2.9737	0.00294229	0.0381493
ENSG00000011009.11	736.059	-0.000223	0.294418	-0.000758	0.999395	0.999942
ENSG00000011021.23	403.615	-0.0210413	0.287981	-0.0730646	0.941755	0.979998
ENSG00000011028.14	296.845	-0.70854	0.325829	-2.17457	0.029662	0.16775
ENSG00000011052.21	653.123	3.93127	0.29644	13.2616	3.87e-40	2.94e-36
ENSG00000011105.14	577.179	0.593178	0.295254	2.00904	0.0445326	0.212938
ENSG00000011114.15	429.483	-0.841672	0.304589	-2.76331	0.00572189	0.059924
ENSG00000011132.12	171.561	0.142849	0.374052	0.381897	0.702538	0.872185
ENSG00000011143.17	310.684	-0.495434	0.328806	-1.50677	0.13187	0.389787
ENSG00000011198.10	370.382	1.27745	0.331748	3.85065	0.000118	0.00393758
ENSG00000011201.12	412.433	0.598977	0.30681	1.95228	0.0509055	0.230226
ENSG00000011243.18	1251.83	0.5399	0.290627	1.85771	0.0632101	0.260309
ENSG00000011258.16	541.469	-1.01571	0.291564	-3.48368	0.000495	0.0111507
ENSG00000011260.14	1133.77	0.238548	0.286177	0.83357	0.404523	0.685077
ENSG00000011275.18	1116.84	0.393282	0.250455	1.57027	0.116353	0.363731
ENSG00000011295.16	579.963	-0.632913	0.272068	-2.3263	0.0200023	0.131412
ENSG00000011304.20	6893.77	-0.280977	0.231727	-1.21253	0.225308	0.516947
ENSG00000011332.19	181.981	0.351662	0.36286	0.969141	0.332475	0.625387
ENSG00000011347.10	150.573	0.578802	0.398597	1.4521	0.146474	0.411504
ENSG00000011376.12	683.376	-0.0112428	0.266912	-0.0421217	0.966402	0.988255
ENSG00000011405.13	1108.99	-0.814306	0.303672	-2.68153	0.00732853	0.0699965
ENSG00000011422.12	119.135	0.546767	0.417632	1.30921	0.190464	0.476571
ENSG00000011426.11	2729.77	0.298214	0.240489	1.24003	0.214963	0.50585
ENSG00000011451.21	1549.97	0.124626	0.261842	0.47596	0.634103	0.835718
ENSG00000011454.17	546.116	0.614048	0.275241	2.23095	0.0256845	0.15288
ENSG00000011478.12	148.449	-0.452995	0.424047	-1.06827	0.285401	0.577259
ENSG00000011485.15	1731.46	0.348378	0.251063	1.38761	0.165255	0.440178
ENSG00000011523.14	419.94	-0.231455	0.284196	-0.814419	0.415405	0.693452
ENSG00000011566.15	441.656	-0.0191628	0.300937	-0.063677	0.949227	0.982057
ENSG00000011638.10	78.7498	0.403383	0.451887	0.892662	0.372038	0.660498
ENSG00000011677.13	19.4683	-0.564545	0.840735	-0.671491	0.501908	0.752021
ENSG00000012048.23	924.202	-0.848586	0.305988	-2.77326	0.00554973	0.0585163
ENSG00000012061.16	536.736	-0.191613	0.314126	-0.609988	0.54187	0.779832
ENSG00000012171.20	36.6077	-2.66518	0.687234	-3.87813	0.000105	0.00366035
ENSG00000012174.12	1522.49	0.123875	0.262755	0.471447	0.637322	0.837097
ENSG00000012211.13	241.075	0.35902	0.318681	1.12658	0.25992	0.552356
ENSG00000012232.9	943.898	0.0300845	0.259515	0.115926	0.907711	0.965283
ENSG00000012660.14	1554.25	-0.341532	0.275459	-1.23987	0.215025	0.505886
ENSG00000012779.11	40.6085	-1.10146	0.606342	-1.81657	0.0692825	0.275823
ENSG00000012822.16	603.913	0.3494	0.277823	1.25764	0.208523	0.498697
ENSG00000012963.15	748.251	-0.683427	0.274824	-2.48678	0.0128905	0.0999
ENSG00000012983.11	605.454	-0.00687105	0.282918	-0.0242864	0.980624	0.993703
ENSG00000013016.16	130.921	-1.536	0.386998	-3.96902	7.22e-05	0.00278341
ENSG00000013275.8	1462.07	0.372516	0.260432	1.43038	0.152609	0.421109
ENSG00000013288.9	470.061	1.27134	0.282013	4.50809	6.54e-06	0.000487
ENSG00000013306.16	2197.45	-0.206601	0.277059	-0.74569	0.455854	0.723313
ENSG00000013364.19	86.3307	1.80418	0.465903	3.87245	0.000108	0.00369603
ENSG00000013374.16	996.577	0.611798	0.261957	2.33549	0.019518	0.129517
ENSG00000013375.16	1051.19	0.539279	0.271466	1.98654	0.046973	0.220241
ENSG00000013392.8	113.27	-0.0066977	0.436784	-0.0153341	0.987766	0.996211
ENSG00000013441.16	631.172	0.829117	0.417524	1.9858	0.047056	0.220562
ENSG00000013503.10	346.673	-0.325084	0.295261	-1.10101	0.270894	0.563304
ENSG00000013523.11	406.589	-1.60416	0.289724	-5.53686	3.08e-08	5.92e-06
ENSG00000013561.18	636.855	0.557895	0.285886	1.95146	0.0510021	0.230457
ENSG00000013563.14	382.49	0.644342	0.314224	2.05058	0.0403077	0.201684
ENSG00000013573.17	1800.67	0.327618	0.255096	1.28429	0.199039	0.488785
ENSG00000013583.10	271.379	-0.34761	0.317322	-1.09545	0.27332	0.565707
ENSG00000013588.9	3305.24	0.967419	0.278175	3.47774	0.000506	0.0112504
ENSG00000013619.14	122.178	0.239486	0.389119	0.615455	0.538254	0.777649
ENSG00000013725.14	18.5533	-1.88971	0.870648	-2.17047	0.0299716	0.16881
ENSG00000013810.19	2478.15	0.302278	0.249112	1.21342	0.224969	0.5168
ENSG00000014123.10	545.091	-0.184438	0.308669	-0.597529	0.550154	0.785793
ENSG00000014138.9	1124.61	-0.835024	0.304828	-2.73933	0.0061565	0.062788
ENSG00000014164.7	408.421	0.115449	0.294739	0.3917	0.69528	0.867943
ENSG00000014216.16	1673.66	-0.200749	0.294941	-0.680641	0.496098	0.749087
ENSG00000014257.16	15.717	-0.507222	0.986293	-0.51427	0.607063	0.820066
ENSG00000014641.20	2090.84	0.0657168	0.242351	0.271164	0.786265	0.910651
ENSG00000014824.14	1047.56	0.184046	0.254546	0.723036	0.469658	0.733241
ENSG00000014914.21	52.4457	0.267665	0.544837	0.491275	0.623232	0.829561
ENSG00000014919.13	1088.84	-0.235321	0.260534	-0.903224	0.366407	0.655821
ENSG00000015133.19	258.827	-0.849319	0.334005	-2.54284	0.0109957	0.0909394
ENSG00000015153.14	266.108	0.355306	0.317931	1.11756	0.263756	0.55595
ENSG00000015171.19	542.619	0.659161	0.288615	2.28388	0.0223788	0.140965
ENSG00000015285.11	2.83592	0.972413	2.05448	0.473314	0.635989	NA
ENSG00000015475.18	312.597	0.0925848	0.31669	0.292352	0.770018	0.903218
ENSG00000015479.19	5335.44	-0.0637662	0.252187	-0.252853	0.800382	0.918279
ENSG00000015520.14	21.4038	1.17316	0.90429	1.29733	0.194519	0.482677
ENSG00000015532.10	483.301	0.498608	0.341947	1.45814	0.144801	0.4093
ENSG00000015568.13	495.775	0.943644	0.378626	2.49228	0.0126925	0.0990631
ENSG00000015592.16	2.66014	2.15205	2.37856	0.904771	0.365587	NA
ENSG00000015676.18	1061.13	0.00845669	0.276182	0.03062	0.975573	0.992408
ENSG00000016082.15	50.4339	0.255485	0.534903	0.477628	0.632915	0.835059
ENSG00000016391.11	269.053	-1.0465	0.344618	-3.0367	0.00239181	0.0334062
ENSG00000016864.18	417.143	0.145133	0.308914	0.469815	0.638487	0.83743
ENSG00000017260.19	1503.67	0.181833	0.262683	0.692215	0.488802	0.744927
ENSG00000017797.13	766.522	-0.460583	0.263906	-1.74525	0.0809407	0.29941
ENSG00000018189.13	452.805	-0.0389437	0.2897	-0.134428	0.893064	0.959627
ENSG00000018236.15	77.4846	-0.757676	0.508829	-1.48906	0.136472	0.397571
ENSG00000018280.17	6.79453	-1.17267	1.38028	-0.849592	0.395552	NA
ENSG00000018408.14	680.649	-0.126853	0.285163	-0.444843	0.656433	0.846155
ENSG00000018510.16	1128.71	0.14678	0.292231	0.502274	0.615475	0.824612
ENSG00000018610.15	437.887	0.303478	0.294146	1.03172	0.302201	0.594588
ENSG00000018699.13	417.298	0.177556	0.28294	0.62754	0.530305	0.772899
ENSG00000018869.16	64.511	0.408526	0.569367	0.717509	0.47306	0.735039
ENSG00000019144.19	333.525	-0.925867	0.353029	-2.62264	0.00872526	0.0787814
ENSG00000019186.10	4.27896	-1.15658	1.68552	-0.686185	0.492596	NA
ENSG00000019485.13	192.1	-0.16391	0.347359	-0.471874	0.637017	0.83709
ENSG00000019505.8	10.335	-1.33149	1.14149	-1.16645	0.243431	NA
ENSG00000019549.13	108.601	-2.92813	0.456101	-6.41992	1.36e-10	6.09e-08
ENSG00000019582.15	6.5976	0.827488	1.37231	0.60299	0.546515	NA
ENSG00000019995.6	695.444	0.228943	0.279093	0.820309	0.41204	0.691261
ENSG00000020129.16	845.515	-0.61649	0.292618	-2.10681	0.0351342	0.187119
ENSG00000020181.18	483.97	-0.853789	0.313592	-2.72261	0.0064769	0.0649228
ENSG00000020256.20	642.96	-0.355282	0.282979	-1.25551	0.209295	0.499601
ENSG00000020426.11	322.594	0.00747287	0.299048	0.0249889	0.980064	0.993665
ENSG00000020577.14	387.602	0.261963	0.310459	0.843793	0.398785	0.681436
ENSG00000020633.18	135.28	0.177048	0.372508	0.475286	0.634583	0.835916
ENSG00000020922.13	1259.69	0.271757	0.252333	1.07698	0.28149	0.574217
ENSG00000021300.14	198.896	-0.453531	0.419	-1.08241	0.279069	0.571682
ENSG00000021355.13	238.21	-0.0417091	0.354099	-0.117789	0.906235	0.964751
ENSG00000021488.13	5.1705	1.80158	1.5899	1.13314	0.257155	NA
ENSG00000021574.12	409.469	-0.218051	0.298928	-0.729442	0.465732	0.730936
ENSG00000021762.20	364.778	-0.0469434	0.357955	-0.131143	0.895662	0.961192
ENSG00000021776.11	554.378	0.0521502	0.284882	0.183059	0.854752	0.942311
ENSG00000021826.17	171.843	1.02689	0.379229	2.70783	0.00677252	0.0664398
ENSG00000022267.19	2345.41	-0.452354	0.247029	-1.83118	0.0670733	0.269973
ENSG00000022277.12	1349.06	0.204679	0.254037	0.805703	0.420414	0.697827
ENSG00000022567.9	175.445	0.358235	0.354826	1.00961	0.312683	0.605986
ENSG00000022840.16	2533.86	0.606865	0.244237	2.48474	0.0129648	0.099905
ENSG00000022976.15	238.458	-0.159796	0.323022	-0.49469	0.620819	0.828195
ENSG00000023041.11	560.559	-0.466703	0.279965	-1.66701	0.0955133	0.32463
ENSG00000023171.18	166.711	-0.684619	0.384841	-1.77896	0.0752456	0.2886
ENSG00000023191.17	2391.88	0.472697	0.253882	1.86188	0.0626204	0.258581
ENSG00000023228.14	1373.57	0.0488493	0.250183	0.195254	0.845194	0.938094
ENSG00000023287.13	969.835	0.267922	0.304552	0.879725	0.379008	0.665933
ENSG00000023318.8	398.603	0.718852	0.28545	2.51831	0.0117919	0.0946474
ENSG00000023330.15	612.415	0.615883	0.301095	2.04548	0.0408077	0.202784
ENSG00000023445.16	46.1958	1.39311	0.632814	2.20146	0.0277037	0.159837
ENSG00000023516.9	698.086	-0.0423686	0.304148	-0.139303	0.889211	0.958745
ENSG00000023572.9	353.41	0.893121	0.294199	3.03577	0.00239922	0.0334789
ENSG00000023608.5	176.234	0.145943	0.391034	0.373223	0.708983	0.875649
ENSG00000023697.13	360.77	0.420221	0.322328	1.30371	0.192333	0.479699
ENSG00000023734.11	1934.46	-0.16759	0.25724	-0.651492	0.514729	0.76106
ENSG00000023839.12	54.1797	0.780779	0.535331	1.4585	0.144703	0.409251
ENSG00000023892.11	63.9533	-0.598935	0.506636	-1.18218	0.237135	0.528533
ENSG00000023902.14	279.654	-0.559848	0.314279	-1.78137	0.0748516	0.287815
ENSG00000023909.10	420.288	-0.325974	0.286525	-1.13768	0.255253	0.548011
ENSG00000024048.10	854.77	0.437203	0.277835	1.57361	0.115579	0.36228
ENSG00000024422.12	9.46512	-1.00765	1.16151	-0.867537	0.385648	NA
ENSG00000024526.17	1161.91	-0.325973	0.271126	-1.20229	0.22925	0.520574
ENSG00000024862.17	307.595	1.0832	0.326815	3.31442	0.000918	0.0169006
ENSG00000025039.15	256.024	0.253982	0.331038	0.76723	0.442945	0.714467
ENSG00000025156.13	562.713	0.378039	0.297094	1.27245	0.203212	0.493454
ENSG00000025293.17	813.787	0.483591	0.257431	1.87853	0.0603089	0.253785
ENSG00000025423.11	38.6576	0.132554	0.612848	0.216291	0.828761	0.931842
ENSG00000025434.19	66.2237	-1.1871	0.508968	-2.33236	0.0196817	0.130187
ENSG00000025708.14	33.661	-0.357554	0.637294	-0.56105	0.574763	0.800339
ENSG00000025770.19	1226.27	-3.63e-05	0.264366	-0.000137	0.99989	0.999942
ENSG00000025772.8	2156.53	1.39279	0.25788	5.4009	6.63e-08	1.12e-05
ENSG00000025796.14	1943.93	0.202236	0.25221	0.801856	0.422636	0.699606
ENSG00000025800.14	1572.86	0.55833	0.264441	2.11136	0.0347414	0.185945
ENSG00000026025.16	5889.64	-0.405559	0.232162	-1.74688	0.0806581	0.299073
ENSG00000026036.22	300.606	-0.0645642	0.388862	-0.166034	0.86813	0.94933
ENSG00000026103.22	83.1755	-0.353554	0.52227	-0.676955	0.498434	0.750293
ENSG00000026297.16	194.81	-1.00447	0.393297	-2.55397	0.0106503	0.0889241
ENSG00000026508.19	442.815	-0.376143	0.872213	-0.431251	0.666286	0.851071
ENSG00000026559.14	298.169	-0.644465	0.329041	-1.95861	0.050158	0.228153
ENSG00000026652.15	272.149	-0.18217	0.339784	-0.536135	0.591865	0.812293
ENSG00000026751.17	4.29617	2.97217	2.06578	1.43877	0.150217	NA
ENSG00000026950.17	111.602	-0.284974	0.409445	-0.696	0.486429	0.743265
ENSG00000027001.10	250.066	0.124193	0.323145	0.384326	0.700737	0.87098
ENSG00000027075.15	246.489	0.262759	0.324075	0.810798	0.417482	0.695319
ENSG00000027644.5	2.38793	-4.61637	2.68069	-1.72208	0.0850542	NA
ENSG00000027697.15	371.689	0.431724	0.315617	1.36787	0.171352	0.447105
ENSG00000027847.14	184.745	-0.445304	0.366043	-1.21653	0.223782	0.515318
ENSG00000027869.11	5.2343	-2.52222	1.7391	-1.4503	0.146975	NA
ENSG00000028116.17	267.428	-0.48149	0.314189	-1.53249	0.125402	0.379371
ENSG00000028203.18	798.758	-0.0394384	0.278242	-0.141741	0.887284	0.958001
ENSG00000028277.21	131.893	3.78513	0.454102	8.33542	7.72e-17	1.3e-13
ENSG00000028310.18	923.521	-0.286567	0.255546	-1.12139	0.262121	0.554299
ENSG00000028528.15	774.924	-0.255457	0.260406	-0.980992	0.326597	0.620123
ENSG00000028839.10	378.726	0.449205	0.295695	1.51915	0.128725	0.385159
ENSG00000029153.14	688.398	0.453846	0.266909	1.70038	0.0890602	0.313897
ENSG00000029363.17	3667.83	-0.170297	0.24386	-0.698339	0.484965	0.742765
ENSG00000029364.12	745.387	0.471892	0.265366	1.77827	0.0753603	0.288821
ENSG00000029534.21	264.867	-0.774764	0.374317	-2.06981	0.0384702	0.196833
ENSG00000029639.11	129.468	-0.0696677	0.393796	-0.176913	0.859576	0.944667
ENSG00000029725.17	1128.48	0.420404	0.270374	1.5549	0.11997	0.370316
ENSG00000029993.15	1315.61	-0.514493	0.266716	-1.92899	0.053732	0.237102
ENSG00000030066.13	2784.82	0.296047	0.278826	1.06176	0.288344	0.580897
ENSG00000030110.13	753.498	0.406285	0.287584	1.41276	0.157728	0.430388
ENSG00000030419.16	51.5838	-0.441998	0.574165	-0.769809	0.441413	0.713165
ENSG00000030582.18	2830.36	0.43405	0.290168	1.49586	0.13469	0.395355
ENSG00000031003.10	724.048	0.513599	0.299785	1.71322	0.0866716	0.309387
ENSG00000031081.11	84.5401	-0.71317	0.45454	-1.56899	0.11665	0.36406
ENSG00000031691.7	330.482	1.26783	0.3299	3.84307	0.000122	0.00402268
ENSG00000031698.13	2328.76	0.770908	0.245926	3.13471	0.00172024	0.0267287
ENSG00000031823.14	1078.16	0.340839	0.274569	1.24136	0.214473	0.505208
ENSG00000032219.19	390.04	0.308931	0.304288	1.01526	0.309981	0.602825
ENSG00000032389.12	448.206	0.208136	0.288533	0.721359	0.470688	0.734276
ENSG00000032444.16	803.419	0.639762	0.307715	2.07908	0.0376103	0.194993
ENSG00000032742.17	110.363	0.100708	0.412032	0.244418	0.806907	0.921659
ENSG00000033011.13	638.956	0.381963	0.294471	1.29711	0.194592	0.482779
ENSG00000033030.15	654.907	0.224688	0.281736	0.797515	0.425152	0.701428
ENSG00000033050.9	1498.43	0.385418	0.274305	1.40507	0.16	0.433104
ENSG00000033100.16	779.063	0.56375	0.297613	1.89424	0.0581934	0.249028
ENSG00000033122.21	150.206	-0.636694	0.460708	-1.38199	0.166975	0.442694
ENSG00000033170.17	189.51	-0.244161	0.352102	-0.693438	0.488035	0.744372
ENSG00000033178.13	613.274	-0.447998	0.314994	-1.42224	0.154956	0.425193
ENSG00000033327.13	234.275	0.583219	0.346452	1.68341	0.0922964	0.319217
ENSG00000033627.16	1711.34	0.818975	0.258984	3.16226	0.00156547	0.024806
ENSG00000033800.13	720.244	0.33085	0.265339	1.2469	0.212436	0.502909
ENSG00000033867.16	289.361	-0.870427	0.381061	-2.28422	0.0223586	0.140922
ENSG00000034053.14	323.512	0.00886002	0.302409	0.0292981	0.976627	0.992633
ENSG00000034152.19	559.376	-0.0477781	0.274352	-0.174149	0.861749	0.945702
ENSG00000034510.6	3603.72	-0.309241	0.357859	-0.864142	0.38751	0.673096
ENSG00000034533.11	146.467	-0.231839	0.378556	-0.61243	0.540253	0.779094
ENSG00000034677.13	319.865	-0.0814695	0.325463	-0.250319	0.802341	0.919208
ENSG00000034693.15	291.912	-0.365676	0.314716	-1.16192	0.245267	0.538128
ENSG00000034713.8	745.141	0.195407	0.266608	0.73294	0.463595	0.729375
ENSG00000035115.22	129.001	-0.0698197	0.432049	-0.161601	0.87162	0.9502
ENSG00000035141.8	1969.59	0.584637	0.26008	2.24791	0.0245818	0.14906
ENSG00000035403.18	4403.98	0.261462	0.244239	1.07052	0.284385	0.576032
ENSG00000035499.13	559.65	-0.168985	0.302063	-0.559436	0.575864	0.800992
ENSG00000035664.11	15.6847	-0.5631	0.910456	-0.618481	0.536258	0.776833
ENSG00000035681.9	299.198	0.379331	0.308255	1.23058	0.218481	0.510166
ENSG00000035687.10	1140.89	0.443429	0.263316	1.68402	0.0921786	0.319217
ENSG00000035862.12	985.276	-1.00516	0.30534	-3.29193	0.000995	0.0178306
ENSG00000035928.16	1138.64	-1.0474	0.259572	-4.0351	5.46e-05	0.00228478
ENSG00000036054.13	518.21	0.843586	0.318739	2.64664	0.00812968	0.0750083
ENSG00000036257.13	966.266	0.0268368	0.281494	0.0953371	0.924047	0.972291
ENSG00000036448.10	5.21355	-1.51259	1.7211	-0.878846	0.379485	NA
ENSG00000036530.9	10.612	1.47213	1.14992	1.2802	0.200475	NA
ENSG00000036549.13	638.966	-0.0585635	0.29384	-0.199304	0.842025	0.937026
ENSG00000036672.16	120.536	-0.0171655	0.400595	-0.04285	0.965821	0.988255
ENSG00000037042.9	199.23	-0.435704	0.36127	-1.20603	0.227805	0.519321
ENSG00000037241.7	359	-0.287914	0.302014	-0.953312	0.340432	0.63304
ENSG00000037280.16	352.969	0.481228	0.297698	1.61649	0.105988	0.343922
ENSG00000037474.15	2791.25	0.42926	0.256114	1.67605	0.0937288	0.321223
ENSG00000037637.11	478.032	-0.0347352	0.275429	-0.126113	0.899642	0.962521
ENSG00000037749.12	322.501	0.137863	0.358345	0.384722	0.700443	0.870884
ENSG00000037757.14	577.076	-1.1365	0.364309	-3.11961	0.00181091	0.0277031
ENSG00000037897.17	345.654	0.183683	0.315646	0.581926	0.560616	0.792299
ENSG00000037965.6	148.278	0.152879	0.394981	0.387053	0.698717	0.869947
ENSG00000038002.9	182.173	-0.707348	0.348189	-2.03151	0.0422037	0.207482
ENSG00000038210.14	441.722	-0.67301	0.299641	-2.24605	0.0247008	0.149424
ENSG00000038219.13	975.564	-0.0776665	0.264104	-0.294075	0.7687	0.902349
ENSG00000038274.17	636.772	0.0887429	0.270058	0.328607	0.742453	0.893012
ENSG00000038295.8	8.87854	0.767554	1.18536	0.647528	0.51729	NA
ENSG00000038358.15	1693.53	0.248792	0.253526	0.981328	0.326431	0.620097
ENSG00000038382.20	2045.86	0.128767	0.259217	0.496755	0.619362	0.827486
ENSG00000038427.16	950.549	-0.215671	0.341439	-0.631653	0.527614	0.771019
ENSG00000038532.16	964.779	0.492283	0.254797	1.93206	0.0533526	0.236163
ENSG00000039068.19	3.31061	-0.0346427	2.0913	-0.0165652	0.986784	NA
ENSG00000039123.16	1134.61	-0.054936	0.266469	-0.206163	0.836664	0.935082
ENSG00000039139.9	3.90228	-1.95435	1.84102	-1.06156	0.288436	NA
ENSG00000039319.17	944.296	0.0722478	0.301667	0.239495	0.810721	0.923102
ENSG00000039523.20	662.458	-0.995417	0.334692	-2.97413	0.00293825	0.0381493
ENSG00000039560.14	1279.88	-0.231681	0.245305	-0.94446	0.344934	0.637258
ENSG00000039600.11	8.89609	6.69995	1.92284	3.4844	0.000493	NA
ENSG00000039650.12	533.55	0.694576	0.298879	2.32393	0.020129	0.131913
ENSG00000039987.7	3.2936	-0.0472768	1.93368	-0.0244492	0.980494	NA
ENSG00000040199.18	335.404	-0.320825	0.298903	-1.07334	0.283117	0.575457
ENSG00000040275.17	835.086	-0.0922373	0.255529	-0.360966	0.718125	0.879625
ENSG00000040341.18	352.707	-0.336129	0.306256	-1.09754	0.272404	0.564672
ENSG00000040487.13	343.814	0.17899	0.309829	0.577706	0.563463	0.793621
ENSG00000040531.16	238.062	-0.0146868	0.340839	-0.0430902	0.96563	0.988128
ENSG00000040608.14	143.672	0.194968	0.396894	0.491234	0.623261	0.829561
ENSG00000040633.13	624.754	0.0492537	0.294001	0.167529	0.866954	0.948801
ENSG00000040933.16	541.042	-1.00348	0.282115	-3.55697	0.000375	0.00916534
ENSG00000041353.10	24.2043	-0.420421	0.745882	-0.563656	0.572988	0.799185
ENSG00000041357.16	2995.21	-0.225493	0.2432	-0.927194	0.353826	0.64477
ENSG00000041802.11	663.494	0.547286	0.289489	1.89053	0.0586877	0.250019
ENSG00000041880.14	42.4644	-1.12463	0.609805	-1.84424	0.0651482	0.265342
ENSG00000041982.16	145.934	-0.110254	0.396639	-0.277971	0.781035	0.90864
ENSG00000041988.15	851.128	0.51393	0.257359	1.99693	0.0458323	0.216624
ENSG00000042088.14	313.642	-0.77543	0.314127	-2.46852	0.0135671	0.102877
ENSG00000042286.15	347.837	0.159363	0.324981	0.490378	0.623867	0.829731
ENSG00000042317.17	75.2912	-0.44244	0.505505	-0.875244	0.381441	0.667758
ENSG00000042429.12	1008.38	0.485142	0.278107	1.74445	0.0810814	0.299488
ENSG00000042445.14	441.275	0.20993	0.284611	0.737603	0.460756	0.727142
ENSG00000042493.16	34.2624	-2.08071	0.697939	-2.98122	0.00287106	0.0376434
ENSG00000042753.12	1792.56	0.524231	0.289497	1.81083	0.0701665	0.277597
ENSG00000042980.13	3.84016	-0.967904	1.78091	-0.543489	0.586793	NA
ENSG00000043039.7	160.03	-0.00103335	0.38779	-0.00266472	0.997874	0.999652
ENSG00000043093.15	490.381	0.274032	0.280237	0.97786	0.328144	0.621832
ENSG00000043143.20	235.744	-0.572046	0.355751	-1.60799	0.107836	0.347357
ENSG00000043355.12	903.195	0.33484	0.261142	1.28222	0.199767	0.489627
ENSG00000043514.17	279.951	0.420088	0.353155	1.18953	0.234231	0.52599
ENSG00000043591.6	22.1524	-0.476861	0.771205	-0.618332	0.536357	0.776859
ENSG00000044090.10	472.203	-0.840637	0.315748	-2.66236	0.00775944	0.0726509
ENSG00000044115.21	5395.32	0.484643	0.231739	2.09133	0.0364983	0.191214
ENSG00000044446.12	240.471	-0.737805	0.349465	-2.11124	0.0347514	0.185945
ENSG00000044459.15	232.82	-0.647658	0.334539	-1.93597	0.0528714	0.235217
ENSG00000044524.11	52.0966	-0.589023	0.535524	-1.0999	0.271376	0.563905
ENSG00000044574.8	8581.08	1.09666	0.240959	4.55125	5.33e-06	0.000427
ENSG00000046604.13	1269.84	-0.286986	0.276234	-1.03892	0.298841	0.591377
ENSG00000046647.13	33.2907	-0.209467	0.666101	-0.314468	0.753166	0.89646
ENSG00000046651.15	416.814	-0.519156	0.285093	-1.821	0.0686066	0.273928
ENSG00000046653.15	77.5877	-0.441974	0.497929	-0.887624	0.374743	0.662624
ENSG00000046774.10	16.2123	5.08191	1.49053	3.40946	0.000651	0.0133702
ENSG00000046889.19	16.6418	-0.0465539	0.880729	-0.0528584	0.957845	0.984804
ENSG00000047056.16	155.793	0.503977	0.357354	1.4103	0.158451	0.431508
ENSG00000047188.16	771.08	-0.553488	0.276351	-2.00284	0.0451944	0.214818
ENSG00000047249.18	668.256	0.749265	0.267773	2.79813	0.00513989	0.0557501
ENSG00000047315.17	2942.44	0.630201	0.258186	2.44088	0.0146515	0.107212
ENSG00000047346.12	144.43	0.023846	0.415186	0.0574346	0.954199	0.983647
ENSG00000047365.12	139.226	0.259947	0.390865	0.665055	0.506016	0.755015
ENSG00000047410.14	4093.4	0.404273	0.238818	1.69281	0.0904918	0.316045
ENSG00000047457.14	27.9675	0.457455	0.72308	0.632649	0.526963	0.771007
ENSG00000047578.13	236.115	-0.214132	0.31861	-0.672083	0.501531	0.751678
ENSG00000047579.20	328.023	0.568045	0.316122	1.79692	0.0723483	0.282551
ENSG00000047597.7	190.985	0.286429	0.364197	0.786469	0.431593	0.706505
ENSG00000047617.15	37.0818	1.27922	0.631539	2.02556	0.0428094	0.209107
ENSG00000047621.12	504.348	0.768341	0.276604	2.77776	0.00547345	0.0583681
ENSG00000047634.15	508.503	0.100251	0.339428	0.295354	0.767723	0.901805
ENSG00000047644.19	275.832	0.398208	0.310539	1.28231	0.199733	0.489627
ENSG00000047648.23	7.95813	-1.21361	1.26442	-0.959812	0.33715	NA
ENSG00000047662.5	95.7082	-0.517637	0.457633	-1.13112	0.258005	0.550112
ENSG00000047849.21	3049.9	-0.0539395	0.253035	-0.21317	0.831194	0.9322
ENSG00000047932.14	1015.1	0.158823	0.299108	0.530989	0.595426	0.81289
ENSG00000047936.10	3.03794	-0.298768	2.15697	-0.138513	0.889835	NA
ENSG00000048028.11	539.434	-0.488332	0.2931	-1.66609	0.0956953	0.324878
ENSG00000048052.21	71.4032	0.719525	0.522312	1.37758	0.168334	0.443481
ENSG00000048140.18	500.631	0.205801	0.314025	0.655365	0.512232	0.759752
ENSG00000048162.21	336.922	0.506709	0.358171	1.41471	0.157153	0.429205
ENSG00000048342.16	149.644	0.0840321	0.36463	0.230458	0.817736	0.926645
ENSG00000048392.12	543.723	0.65862	0.340275	1.93555	0.0529227	0.235304
ENSG00000048405.10	186.001	-0.607374	0.355864	-1.70676	0.0878668	0.311314
ENSG00000048471.14	369.439	0.0267762	0.296918	0.0901807	0.928144	0.973904
ENSG00000048544.6	570.615	-0.725758	0.269341	-2.69457	0.00704803	0.0681991
ENSG00000048649.13	1493.86	0.119579	0.261197	0.457813	0.647087	0.842253
ENSG00000048707.15	760.334	-0.453028	0.268828	-1.6852	0.0919502	0.319158
ENSG00000048740.18	342.921	0.387494	0.309867	1.25052	0.211111	0.501335
ENSG00000048828.17	3377.99	-0.174099	0.23543	-0.739495	0.459606	0.726308
ENSG00000048991.16	746.876	0.470629	0.259367	1.81453	0.0695963	0.27671
ENSG00000049089.15	40.6696	-1.62765	0.632086	-2.57505	0.0100226	0.0853242
ENSG00000049130.16	204.548	-0.426667	0.375131	-1.13738	0.255379	0.548058
ENSG00000049167.14	83.5976	0.212755	0.458996	0.463522	0.64299	0.839995
ENSG00000049192.15	32.9475	0.542744	0.671946	0.807721	0.419251	0.69704
ENSG00000049239.13	539.148	-0.98772	0.329572	-2.99698	0.00272672	0.0365859
ENSG00000049245.13	1435.24	0.0763683	0.257809	0.296221	0.767061	0.901525
ENSG00000049246.14	203.402	0.0953718	0.343175	0.27791	0.781081	0.90864
ENSG00000049247.13	21.9827	0.266929	0.817447	0.32654	0.744016	0.893619
ENSG00000049249.9	13.3314	0.111465	0.992073	0.112356	0.910542	NA
ENSG00000049323.16	384.234	-0.802445	0.332003	-2.41698	0.0156499	0.112325
ENSG00000049449.10	4093.42	-0.182456	0.23212	-0.786041	0.431843	0.706571
ENSG00000049541.11	822.69	0.275868	0.271085	1.01764	0.308847	0.601837
ENSG00000049618.24	716.785	-0.705697	0.262413	-2.68926	0.00716106	0.0689436
ENSG00000049656.14	1730.32	-0.723627	0.258807	-2.79601	0.00517371	0.055997
ENSG00000049759.18	1542.64	1.31212	0.336291	3.90175	9.55e-05	0.00343077
ENSG00000049768.16	9.4621	-0.652689	1.21882	-0.53551	0.592297	NA
ENSG00000049769.14	135.768	0.475802	0.402552	1.18196	0.23722	0.52864
ENSG00000049860.14	724.96	0.166422	0.2602	0.639594	0.522437	0.767716
ENSG00000049883.15	297.279	-0.108555	0.344607	-0.31501	0.752754	0.896437
ENSG00000050030.15	23.8991	-0.0756891	0.738508	-0.102489	0.918368	0.969875
ENSG00000050130.18	309.385	-1.37078	0.307919	-4.45177	8.52e-06	0.000591
ENSG00000050165.18	379.428	0.571174	0.295957	1.92992	0.053617	0.236821
ENSG00000050327.15	288.616	0.953734	0.328623	2.90221	0.0037054	0.0446528
ENSG00000050344.9	516.59	0.207071	0.273341	0.757557	0.448716	0.718513
ENSG00000050393.11	857.911	0.379156	0.283132	1.33915	0.180522	0.462208
ENSG00000050405.13	1031.55	0.33851	0.280359	1.20742	0.227272	0.519108
ENSG00000050426.16	649.624	0.260594	0.273244	0.953704	0.340233	0.632748
ENSG00000050438.17	35.2231	-0.653535	0.626757	-1.04273	0.297076	0.589727
ENSG00000050555.18	350.624	-0.702587	0.322645	-2.17758	0.029437	0.16685
ENSG00000050628.20	14.9283	-0.215734	0.933815	-0.231024	0.817296	0.926492
ENSG00000050748.17	750.731	-0.497331	0.259469	-1.91672	0.0552733	0.241083
ENSG00000050767.17	27.9303	-0.785914	0.699434	-1.12364	0.261165	0.553441
ENSG00000050820.17	557.029	-0.268355	0.296993	-0.903574	0.366221	0.655695
ENSG00000051009.11	627.077	0.272892	0.276134	0.98826	0.323026	0.617889
ENSG00000051108.15	980.746	1.46819	0.291121	5.04324	4.58e-07	5.52e-05
ENSG00000051128.19	112.749	-0.19215	0.418552	-0.459084	0.646174	0.84141
ENSG00000051180.17	275.556	1.12369	0.310205	3.62242	0.000292	0.00776731
ENSG00000051341.14	928.943	0.743091	0.264599	2.80837	0.00497936	0.0547513
ENSG00000051382.9	272.674	-0.56957	0.308587	-1.84574	0.0649305	0.26474
ENSG00000051523.11	888.701	-0.254122	0.412151	-0.616575	0.537515	0.777443
ENSG00000051596.10	850.24	0.26134	0.298111	0.876654	0.380675	0.667151
ENSG00000051620.11	826.748	0.30648	0.268218	1.14265	0.253183	0.545985
ENSG00000051825.15	649.278	-0.723163	0.298723	-2.42085	0.0154844	0.111412
ENSG00000052126.14	818.612	-0.0638868	0.26939	-0.237153	0.812538	0.923642
ENSG00000052344.16	2.75129	-2.03793	2.3495	-0.86739	0.385728	NA
ENSG00000052723.12	860.08	-0.775643	0.308666	-2.51289	0.0119747	0.0955817
ENSG00000052749.14	1467.97	1.16127	0.358349	3.2406	0.00119279	0.0201844
ENSG00000052795.13	349.822	0.00576427	0.310516	0.0185635	0.985189	0.995408
ENSG00000052802.13	425.249	-0.98615	0.321421	-3.06809	0.0021543	0.0315079
ENSG00000052841.15	1662.85	0.988831	0.267727	3.69343	0.000221	0.00637978
ENSG00000052850.8	543.423	-0.367551	0.290692	-1.2644	0.206087	0.496516
ENSG00000053108.17	3.85449	1.18589	1.7715	0.669425	0.503225	NA
ENSG00000053254.15	429.959	-1.05281	0.292125	-3.60396	0.000313	0.00813412
ENSG00000053328.8	2.90703	-1.46397	2.18545	-0.669869	0.502941	NA
ENSG00000053371.12	512.26	-2.02993	0.383958	-5.28686	1.24e-07	1.97e-05
ENSG00000053372.5	1359.7	0.289657	0.291235	0.994579	0.319941	0.614643
ENSG00000053438.11	9.45583	0.453885	1.1816	0.384127	0.700884	NA
ENSG00000053501.13	125.976	0.177831	0.452267	0.393198	0.694173	0.867112
ENSG00000053524.12	96.1085	-0.736753	0.425058	-1.7333	0.0830424	0.302582
ENSG00000053702.15	12.311	-0.167895	0.999356	-0.168003	0.866581	NA
ENSG00000053747.16	157.644	-0.47366	0.36473	-1.29866	0.194061	0.48186
ENSG00000053770.12	537.885	0.264748	0.291098	0.909482	0.363096	0.653462
ENSG00000053900.10	352.919	0.280324	0.295522	0.94857	0.342839	0.635417
ENSG00000053918.18	84.765	0.00161386	0.438679	0.00367891	0.997065	0.999498
ENSG00000054116.12	796.68	0.229759	0.293171	0.783705	0.433213	0.707432
ENSG00000054118.15	2503.41	-0.0893278	0.239808	-0.372497	0.709523	0.875794
ENSG00000054148.18	1072.84	0.338224	0.311969	1.08416	0.278295	0.570833
ENSG00000054179.12	24.5212	1.30085	0.762657	1.70568	0.0880669	0.311528
ENSG00000054267.22	996.354	0.795801	0.280272	2.83939	0.00452004	0.0511822
ENSG00000054277.14	44.3947	-0.449282	0.567907	-0.791119	0.428875	0.704027
ENSG00000054282.16	176.357	0.0166744	0.34728	0.0480143	0.961705	0.986544
ENSG00000054356.14	3.13115	0.621037	2.18411	0.284343	0.776148	NA
ENSG00000054392.13	50.784	-0.905889	0.558667	-1.62152	0.104907	0.342242
ENSG00000054523.17	1419.39	-0.334875	0.258724	-1.29433	0.195551	0.484287
ENSG00000054598.9	2534.41	0.225166	0.248774	0.905102	0.365411	0.654888
ENSG00000054611.14	325.331	0.144647	0.301539	0.479695	0.631444	0.834095
ENSG00000054654.18	1104.03	-0.0842362	0.2743	-0.307095	0.758771	0.899258
ENSG00000054690.14	330.615	-0.15423	0.304237	-0.506939	0.612198	0.822107
ENSG00000054793.14	936.729	-0.686988	0.308271	-2.22852	0.025846	0.15348
ENSG00000054965.10	1356.34	-0.556829	0.246858	-2.25567	0.0240914	0.147321
ENSG00000054967.13	555.003	0.361559	0.327234	1.1049	0.269205	0.562321
ENSG00000055044.11	2295.64	0.390581	0.266912	1.46333	0.143377	0.407819
ENSG00000055070.17	2879.45	0.343716	0.246386	1.39503	0.163006	0.437099
ENSG00000055118.15	32.6415	-0.199857	0.672587	-0.297146	0.766355	0.901122
ENSG00000055130.17	1458.11	0.47549	0.246049	1.9325	0.0532972	0.236145
ENSG00000055147.19	292.123	0.600261	0.30531	1.96607	0.0492904	0.225881
ENSG00000055163.20	738.948	-0.738734	0.283461	-2.60612	0.00915744	0.0807455
ENSG00000055208.19	1224.36	0.0174292	0.273028	0.0638368	0.9491	0.982026
ENSG00000055211.14	499.969	0.845757	0.275034	3.0751	0.00210433	0.0309259
ENSG00000055332.18	1199	0.171337	0.273676	0.626057	0.531277	0.77336
ENSG00000055483.19	938.093	-0.173728	0.277687	-0.625627	0.531559	0.773481
ENSG00000055609.18	919.911	-0.385706	0.306087	-1.26012	0.207626	0.497726
ENSG00000055732.13	456.66	1.10428	0.318606	3.46597	0.000528	0.0116354
ENSG00000055813.6	3.74836	0.755752	1.75886	0.429683	0.667427	NA
ENSG00000055917.15	1344.97	-0.281415	0.277249	-1.01503	0.310094	0.602945
ENSG00000055950.16	973.47	-0.0865664	0.317966	-0.27225	0.785429	0.910403
ENSG00000055955.17	14.9225	-0.682559	0.986442	-0.69194	0.488975	0.744984
ENSG00000056050.7	261.843	0.156995	0.33117	0.474061	0.635456	0.836469
ENSG00000056097.16	2582.52	-0.0831942	0.267114	-0.311456	0.755454	0.897897
ENSG00000056277.16	277.246	0.396254	0.43217	0.916893	0.359199	0.64973
ENSG00000056291.17	2.65459	3.40695	2.55508	1.3334	0.182401	NA
ENSG00000056487.16	40.7131	1.7612	0.729644	2.41378	0.0157881	0.112848
ENSG00000056558.11	9.93017	-1.24871	1.15934	-1.07709	0.281441	NA
ENSG00000056586.16	926.118	-0.684101	0.30774	-2.22298	0.0262171	0.154657
ENSG00000056736.10	146.72	-0.779443	0.376073	-2.07259	0.0382109	0.1961
ENSG00000056972.20	190.521	0.314863	0.357229	0.881403	0.3781	0.665569
ENSG00000056998.20	168.096	-0.512837	0.370138	-1.38553	0.16589	0.441019
ENSG00000057019.16	530.866	0.0829212	0.309021	0.268335	0.788441	0.911738
ENSG00000057252.13	698.587	-0.549732	0.263245	-2.08829	0.0367715	0.191889
ENSG00000057294.15	495.914	0.00239779	0.299197	0.0080141	0.993606	0.997479
ENSG00000057468.7	2.73983	-3.24643	2.46103	-1.31913	0.187125	NA
ENSG00000057608.17	1857.27	0.132851	0.254294	0.522429	0.601372	0.815836
ENSG00000057657.17	7.66244	0.328351	1.29525	0.253503	0.799879	NA
ENSG00000057663.16	479.022	0.0902949	0.284428	0.317462	0.750893	0.896178
ENSG00000057704.13	99.9948	0.0206629	0.460736	0.0448476	0.964229	0.987493
ENSG00000057757.10	990.692	0.435065	0.282621	1.53939	0.123709	0.377101
ENSG00000057935.13	508.272	-0.74968	0.295283	-2.53885	0.0111216	0.0916412
ENSG00000058056.9	390.067	-0.715118	0.303504	-2.3562	0.0184627	0.125194
ENSG00000058063.16	905.37	0.026503	0.279365	0.0948686	0.924419	0.972349
ENSG00000058085.15	10.8348	-1.27378	1.08279	-1.17638	0.239441	NA
ENSG00000058091.17	250.974	0.558217	0.351532	1.58796	0.112296	0.356139
ENSG00000058262.10	4686.55	0.529081	0.238733	2.21621	0.0266773	0.155914
ENSG00000058272.19	929.373	0.503861	0.30053	1.67658	0.0936252	0.321102
ENSG00000058335.15	9.85077	1.89828	1.19422	1.58956	0.111934	NA
ENSG00000058404.20	73.8032	1.94108	0.49281	3.9388	8.19e-05	0.00306504
ENSG00000058453.17	410.633	-0.57084	0.344202	-1.65844	0.0972277	0.328619
ENSG00000058600.16	727.209	0.204122	0.274183	0.744475	0.456589	0.723845
ENSG00000058668.14	557.194	-0.968726	0.320921	-3.01858	0.00253961	0.0348303
ENSG00000058673.16	2251.24	-0.357842	0.247083	-1.44826	0.147544	0.413515
ENSG00000058729.11	468.008	0.486218	0.320427	1.51741	0.129164	0.385765
ENSG00000058799.15	226.581	0.444782	0.323047	1.37684	0.168563	0.443611
ENSG00000058804.12	1359.57	-0.804297	0.258005	-3.11737	0.00182474	0.0278681
ENSG00000058866.15	3.36693	-1.15575	1.88773	-0.612244	0.540376	NA
ENSG00000059122.16	1262.81	0.0810561	0.277447	0.29215	0.770172	0.90326
ENSG00000059145.19	728.309	-1.05793	0.304589	-3.47331	0.000514	0.0114046
ENSG00000059377.18	11.8371	0.0264759	1.25253	0.0211379	0.983136	NA
ENSG00000059378.13	31.6579	0.245072	0.71322	0.343614	0.731137	0.887164
ENSG00000059573.9	2372.01	-0.406197	0.23907	-1.69908	0.0893048	0.314138
ENSG00000059588.10	860.957	-1.10139	0.346135	-3.18198	0.00146273	0.0236464
ENSG00000059691.12	313.385	-0.0655579	0.298365	-0.219724	0.826086	0.930429
ENSG00000059728.11	219.357	1.02071	0.406225	2.51266	0.0119823	0.0955817
ENSG00000059758.8	396.25	0.44215	0.333846	1.32441	0.185366	0.469626
ENSG00000059769.20	398.069	1.53124	0.327515	4.67532	2.93e-06	0.000264
ENSG00000059804.16	2533.98	1.59869	0.811746	1.96945	0.0489019	0.225186
ENSG00000059915.17	17.6502	0.334718	0.878977	0.380804	0.703349	0.872777
ENSG00000060069.17	476.575	-0.496862	0.313014	-1.58735	0.112434	0.356466
ENSG00000060138.13	5924.11	0.670761	0.265728	2.52424	0.0115947	0.0936205
ENSG00000060140.9	35.5891	0.835207	0.723186	1.1549	0.248132	0.540512
ENSG00000060237.17	4199.52	-0.194431	0.239496	-0.811835	0.416887	0.694868
ENSG00000060339.14	2204.81	-0.172822	0.23839	-0.724953	0.468481	0.733049
ENSG00000060491.16	970.317	0.123387	0.333803	0.36964	0.711651	0.876238
ENSG00000060642.11	104.571	-1.12053	0.451737	-2.4805	0.0131199	0.100825
ENSG00000060656.20	1159.25	-0.053416	0.308117	-0.173363	0.862366	0.946141
ENSG00000060688.13	872.866	0.177545	0.257568	0.689312	0.490627	0.746209
ENSG00000060709.15	5.30187	0.0780736	1.72943	0.0451442	0.963992	NA
ENSG00000060749.15	1480.75	-0.661273	0.292889	-2.25776	0.0239604	0.14688
ENSG00000060762.19	342.54	0.128446	0.3023	0.424898	0.670911	0.853385
ENSG00000060971.18	324.005	-0.159596	0.339316	-0.470345	0.638108	0.83743
ENSG00000060982.15	1278.62	-0.14759	0.245891	-0.600228	0.548354	0.784928
ENSG00000061273.18	873.196	-0.462805	0.283404	-1.63302	0.102465	0.338417
ENSG00000061337.15	330.566	-0.73811	0.297648	-2.47981	0.0131452	0.100825
ENSG00000061455.11	179.188	-0.41143	0.345659	-1.19028	0.233938	0.525747
ENSG00000061656.10	16.6888	-1.10442	0.88482	-1.24819	0.211963	0.502417
ENSG00000061676.15	2436.93	0.437678	0.271974	1.60926	0.107559	0.346651
ENSG00000061794.13	1795.15	0.718817	0.266329	2.69898	0.00695524	0.0674916
ENSG00000061918.13	218.556	0.618188	0.331756	1.86338	0.0624084	0.258286
ENSG00000061936.9	1165.02	0.21833	0.260379	0.838508	0.401746	0.682801
ENSG00000061938.19	560.374	-0.208388	0.361168	-0.576985	0.563949	0.793755
ENSG00000061987.16	1263.98	0.59126	0.293466	2.01475	0.0439311	0.211772
ENSG00000062038.14	199.384	-0.580201	0.343774	-1.68774	0.0914611	0.317977
ENSG00000062194.16	1440.85	0.382383	0.262124	1.45878	0.144625	0.409183
ENSG00000062282.15	220.035	0.505265	0.339696	1.4874	0.136909	0.398058
ENSG00000062370.16	116.904	0.0548073	0.3971	0.138019	0.890226	0.958745
ENSG00000062485.19	5876.79	-0.438375	0.23312	-1.88047	0.0600435	0.253099
ENSG00000062524.16	47.3886	-0.291525	0.632477	-0.460925	0.644852	0.840603
ENSG00000062582.14	849.035	0.255848	0.302371	0.846139	0.397475	0.680261
ENSG00000062598.18	445.732	-0.32956	0.286583	-1.14996	0.250159	0.542827
ENSG00000062650.19	2001.26	0.200084	0.259645	0.770605	0.440941	0.712972
ENSG00000062716.13	897.484	0.528819	0.260652	2.02883	0.0424758	0.208204
ENSG00000062725.10	600.527	0.420418	0.29411	1.42946	0.152873	0.421455
ENSG00000062822.15	1974.58	0.103635	0.293276	0.353371	0.72381	0.882959
ENSG00000063046.17	6083.08	0.124348	0.229747	0.541239	0.588343	0.809721
ENSG00000063127.16	28.2224	-0.0293619	0.68905	-0.0426122	0.966011	0.988255
ENSG00000063169.10	529.316	0.516658	0.274484	1.88229	0.0597968	0.252339
ENSG00000063176.16	380.871	0.399909	0.382728	1.04489	0.296073	0.588969
ENSG00000063177.13	12985	0.549965	0.271682	2.0243	0.0429396	0.209395
ENSG00000063180.9	133.065	-0.0798774	0.441131	-0.181074	0.856309	0.942871
ENSG00000063241.8	390.85	0.0370529	0.331566	0.111751	0.911021	0.966781
ENSG00000063244.12	3555.71	-0.108687	0.274562	-0.395856	0.692211	0.866046
ENSG00000063245.15	2031.63	0.466396	0.256515	1.8182	0.0690334	0.274976
ENSG00000063322.15	1027.08	0.557816	0.265248	2.103	0.0354662	0.187982
ENSG00000063438.17	33.5503	-0.00913959	0.679054	-0.0134593	0.989261	0.996388
ENSG00000063587.15	604.227	-0.378756	0.269771	-1.40399	0.160321	0.433487
ENSG00000063601.17	804.729	0.350214	0.281676	1.24332	0.21375	0.504292
ENSG00000063660.9	805.282	0.42366	0.259262	1.6341	0.102238	0.337886
ENSG00000063761.16	116.532	0.680973	0.400393	1.70076	0.088988	0.313823
ENSG00000063854.13	485.625	0.211894	0.381997	0.554701	0.579099	0.803864
ENSG00000063978.16	843.42	0.863418	0.279159	3.09293	0.00198194	0.0296433
ENSG00000064012.22	481.221	0.376136	0.296227	1.26976	0.204171	0.494356
ENSG00000064042.18	208.856	-0.348114	0.370366	-0.93992	0.347259	0.638933
ENSG00000064102.15	737.317	-0.433804	0.266924	-1.6252	0.10412	0.341213
ENSG00000064115.11	1167.52	0.20872	0.262781	0.794271	0.427038	0.702758
ENSG00000064195.7	148.564	-1.17733	0.402421	-2.92561	0.00343781	0.0427504
ENSG00000064199.6	198.444	1.08215	0.341816	3.16588	0.00154614	0.0245764
ENSG00000064218.5	101.152	-0.668543	0.436595	-1.53127	0.125704	0.379534
ENSG00000064225.12	132.673	0.633633	0.409443	1.54755	0.121731	0.373097
ENSG00000064270.12	7.97777	-0.624557	1.24192	-0.502898	0.615036	NA
ENSG00000064300.9	108.169	0.840593	0.464932	1.80799	0.0706079	0.27869
ENSG00000064309.14	337.453	-1.02247	0.401707	-2.54532	0.0109178	0.0905605
ENSG00000064313.12	662.06	-0.408793	0.278284	-1.46898	0.141839	0.405451
ENSG00000064393.16	874.982	-0.67975	0.258961	-2.62491	0.00866724	0.0786312
ENSG00000064419.13	1285.72	0.452422	0.247076	1.83111	0.0670846	0.269973
ENSG00000064489.23	34.79	0.688103	0.707612	0.97243	0.330837	0.623901
ENSG00000064490.14	371.727	-0.00639986	0.360736	-0.0177411	0.985845	0.995672
ENSG00000064545.15	512.589	-0.479822	0.343995	-1.39485	0.16306	0.437167
ENSG00000064547.14	90.4035	-0.170917	0.428346	-0.399016	0.689882	0.864543
ENSG00000064601.19	1128.99	0.826963	0.267808	3.0879	0.00201578	0.0299724
ENSG00000064607.17	1634.78	-0.00653686	0.257316	-0.0254041	0.979733	0.993644
ENSG00000064651.14	409.604	-0.040913	0.303471	-0.134817	0.892757	0.959467
ENSG00000064652.11	158.714	0.530364	0.38036	1.39437	0.163205	0.437349
ENSG00000064655.19	206.318	0.534392	0.337108	1.58523	0.112915	0.357545
ENSG00000064666.15	875.88	1.42061	0.267315	5.31436	1.07e-07	1.71e-05
ENSG00000064687.13	222.493	0.252347	0.344993	0.731454	0.464502	0.729995
ENSG00000064692.19	23.4064	-0.304819	0.762054	-0.399997	0.689159	0.864324
ENSG00000064703.12	714.029	0.00455093	0.270107	0.0168486	0.986557	0.995838
ENSG00000064726.10	1567.12	0.556124	0.277199	2.00623	0.0448317	0.213629
ENSG00000064763.11	450.517	-0.591554	0.28983	-2.04104	0.0412468	0.204565
ENSG00000064787.13	4.21528	-0.341697	1.66071	-0.205753	0.836984	NA
ENSG00000064932.16	532.706	0.522756	0.29823	1.75286	0.0796257	0.296349
ENSG00000064933.18	237.727	-0.353358	0.344669	-1.02521	0.305265	0.59817
ENSG00000064961.19	1393.73	-0.26044	0.365178	-0.713188	0.475729	0.736414
ENSG00000064989.13	4.36173	1.08379	1.70269	0.636515	0.52444	NA
ENSG00000064995.18	601.284	-0.0089719	0.270769	-0.0331348	0.973567	0.991112
ENSG00000064999.15	897.967	0.0365157	0.258508	0.141256	0.887668	0.958001
ENSG00000065000.19	3294.24	0.00804938	0.26173	0.0307545	0.975465	0.992379
ENSG00000065029.15	496.573	0.373088	0.315736	1.18165	0.237347	0.528844
ENSG00000065054.14	408.058	-0.36282	0.354969	-1.02212	0.306726	0.599537
ENSG00000065057.9	290.372	-0.311044	0.385226	-0.807432	0.419417	0.697087
ENSG00000065060.17	760.783	0.143032	0.267364	0.534968	0.592672	0.812608
ENSG00000065135.12	1317.53	0.0341325	0.25722	0.132698	0.894432	0.960652
ENSG00000065150.21	3006.53	0.271427	0.263267	1.031	0.302542	0.594674
ENSG00000065154.12	1732.42	-0.292558	0.26559	-1.10154	0.270662	0.563301
ENSG00000065183.16	1114.03	0.278013	0.311161	0.89347	0.371606	0.660498
ENSG00000065243.20	1329.95	-0.405763	0.268918	-1.50888	0.13133	0.388873
ENSG00000065268.11	686.445	0.00411151	0.320218	0.0128397	0.989756	0.996388
ENSG00000065308.5	622.15	-0.25847	0.26505	-0.975172	0.329475	0.622646
ENSG00000065320.9	931.333	0.669742	0.267164	2.50686	0.0121811	0.096512
ENSG00000065328.16	624.38	0.234826	0.279959	0.838787	0.401589	0.682764
ENSG00000065357.20	204.602	0.0304503	0.356078	0.0855157	0.931851	0.975369
ENSG00000065361.16	172.058	-0.0293246	0.362251	-0.0809512	0.935481	0.977126
ENSG00000065413.20	72.9725	-0.218219	0.488938	-0.446311	0.655372	0.846006
ENSG00000065427.14	2300.16	0.510633	0.264578	1.92999	0.0536078	0.236821
ENSG00000065457.10	125.42	-0.829862	0.385077	-2.15505	0.0311577	0.173167
ENSG00000065485.20	237.147	0.223679	0.332705	0.672306	0.501389	0.751613
ENSG00000065491.8	345.735	0.929696	0.323378	2.87495	0.00404095	0.0476632
ENSG00000065518.8	1029.78	0.489289	0.252741	1.93593	0.0528759	0.235217
ENSG00000065526.12	8681.85	-0.498011	0.242285	-2.05548	0.0398328	0.200364
ENSG00000065534.18	250.666	-0.619626	0.328128	-1.88837	0.0589767	0.250548
ENSG00000065548.18	1292.36	-0.0758321	0.264779	-0.286397	0.774574	0.905835
ENSG00000065559.15	428.952	-1.22352	0.287552	-4.25496	2.09e-05	0.00111586
ENSG00000065600.12	153.362	-0.0123514	0.370646	-0.033324	0.973416	0.991112
ENSG00000065609.14	65.1534	0.725971	0.495052	1.46645	0.142524	0.406647
ENSG00000065613.15	2008	0.432943	0.261903	1.65306	0.0983177	0.330335
ENSG00000065615.14	222.871	0.318133	0.36146	0.880133	0.378787	0.665933
ENSG00000065618.21	7.00012	0.682378	1.46539	0.465664	0.641456	NA
ENSG00000065621.15	55.4617	0.606358	0.533875	1.13577	0.256054	0.548413
ENSG00000065665.21	164.031	-0.177359	0.357621	-0.495941	0.619936	0.827771
ENSG00000065675.15	55.6754	-0.583378	0.532935	-1.09465	0.273669	0.565991
ENSG00000065717.15	96.4032	-0.394104	0.463944	-0.849464	0.395623	0.678999
ENSG00000065802.12	462.916	0.0105195	0.282354	0.0372564	0.970281	0.98986
ENSG00000065809.13	353.428	-0.255277	0.299153	-0.853335	0.393473	0.677302
ENSG00000065833.9	391.579	-0.376015	0.307069	-1.22453	0.220752	0.512834
ENSG00000065882.16	601.146	-0.392895	0.283395	-1.38639	0.165628	0.440707
ENSG00000065883.16	782.721	-0.213013	0.25834	-0.824545	0.40963	0.689339
ENSG00000065911.12	2331.15	-0.0488967	0.246416	-0.198431	0.842708	0.937053
ENSG00000065923.10	326.557	-0.0980818	0.305862	-0.320673	0.748458	0.895627
ENSG00000065970.9	440.496	0.300218	0.295365	1.01643	0.309425	0.602323
ENSG00000065978.19	16669.1	0.146441	0.274728	0.533039	0.594007	0.81289
ENSG00000065989.16	320.399	-0.203685	0.314536	-0.647571	0.517263	0.762842
ENSG00000066027.12	322.091	-0.0669806	0.297854	-0.224877	0.822075	0.92906
ENSG00000066044.15	2006.93	0.129934	0.241326	0.538417	0.590289	0.811054
ENSG00000066084.13	1203.93	0.317057	0.28377	1.1173	0.263864	0.55595
ENSG00000066117.15	2134.89	0.490825	0.239348	2.05067	0.040299	0.201684
ENSG00000066135.13	1099.33	-0.687342	0.26265	-2.61695	0.008872	0.0794454
ENSG00000066136.20	806.655	0.444964	0.256898	1.73206	0.0832627	0.303119
ENSG00000066230.12	277.175	-0.414262	0.324929	-1.27493	0.202334	0.492577
ENSG00000066248.15	68.7685	-0.534968	0.481102	-1.11196	0.266153	0.558473
ENSG00000066279.18	1856.68	-0.158619	0.280895	-0.564691	0.572284	0.798864
ENSG00000066322.15	825.56	0.195956	0.303107	0.64649	0.517962	0.763577
ENSG00000066379.15	222.455	0.342116	0.347879	0.983435	0.325394	0.619289
ENSG00000066382.16	90.7147	-0.100042	0.449628	-0.2225	0.823925	0.929776
ENSG00000066405.13	5.8673	-0.826845	1.42938	-0.578464	0.562951	NA
ENSG00000066422.5	517.323	-0.00910311	0.321738	-0.0282936	0.977428	0.992678
ENSG00000066427.24	229.406	0.193139	0.350327	0.551311	0.58142	0.805727
ENSG00000066455.13	343.445	-0.426262	0.311742	-1.36736	0.171514	0.447182
ENSG00000066468.23	484.179	-0.59192	0.307119	-1.92733	0.0539384	0.237531
ENSG00000066557.6	639.871	0.417396	0.299873	1.39191	0.16395	0.438448
ENSG00000066583.12	386.914	-0.699239	0.290072	-2.41057	0.0159277	0.113313
ENSG00000066629.18	372.357	-0.634031	0.327189	-1.93781	0.0526462	0.234401
ENSG00000066651.20	275.802	-0.888997	0.323351	-2.74932	0.00597185	0.0619019
ENSG00000066654.14	530.761	-0.0833544	0.27116	-0.307399	0.75854	0.899124
ENSG00000066697.14	190.787	-0.121809	0.346909	-0.351126	0.725494	0.884161
ENSG00000066735.14	547.231	-0.239083	0.303633	-0.787409	0.431043	0.70587
ENSG00000066739.12	750.46	-0.250852	0.266064	-0.942826	0.34577	0.637428
ENSG00000066777.9	499.406	-0.071652	0.288438	-0.248414	0.803814	0.919717
ENSG00000066827.16	128.295	-0.318737	0.387713	-0.822095	0.411023	0.69057
ENSG00000066855.16	544.234	0.390444	0.302424	1.29105	0.196687	0.485676
ENSG00000066923.17	31.4484	-0.874116	0.66565	-1.31318	0.189124	0.475186
ENSG00000066926.12	961.439	-0.12685	0.299807	-0.423106	0.672218	0.854488
ENSG00000066933.16	475.983	-0.816209	0.289618	-2.81823	0.00482899	0.0537537
ENSG00000067057.17	2606.29	0.439768	0.259842	1.69244	0.0905618	0.316217
ENSG00000067064.11	743.42	-0.310016	0.269566	-1.15006	0.25012	0.542827
ENSG00000067066.17	287.075	1.08573	0.326525	3.3251	0.000884	0.0164399
ENSG00000067082.15	447.242	0.14686	0.327359	0.448621	0.653705	0.845228
ENSG00000067113.17	144.155	-0.158376	0.371192	-0.426669	0.669621	0.85262
ENSG00000067141.17	1645.4	-0.134515	0.252759	-0.532185	0.594598	0.81289
ENSG00000067167.8	1507.21	0.325516	0.25439	1.27959	0.200688	0.490852
ENSG00000067177.15	653.752	0.0322009	0.263103	0.122389	0.902591	0.963317
ENSG00000067182.8	824.459	0.268986	0.273712	0.982736	0.325737	0.619543
ENSG00000067191.16	112.753	0.0785999	0.402956	0.195058	0.845347	0.938094
ENSG00000067208.14	250.174	-1.18951	0.333421	-3.56761	0.00036	0.00895975
ENSG00000067221.14	85.1441	0.110049	0.453854	0.242476	0.808411	0.922061
ENSG00000067225.18	16173.7	0.199129	0.236659	0.841418	0.400114	0.682305
ENSG00000067248.10	514.57	0.0285546	0.272646	0.104732	0.916589	0.969241
ENSG00000067334.14	1078.71	0.0958696	0.261506	0.366606	0.713913	0.877559
ENSG00000067365.15	265.67	-0.141188	0.311649	-0.453035	0.650523	0.844036
ENSG00000067369.14	894.258	0.364003	0.25538	1.42534	0.15406	0.423344
ENSG00000067445.21	730.282	-1.15736	0.27977	-4.13684	3.52e-05	0.00161657
ENSG00000067533.6	602.28	0.507666	0.284433	1.78484	0.0742876	0.286444
ENSG00000067560.12	3967.44	-0.273521	0.247637	-1.10452	0.269366	0.562321
ENSG00000067596.12	1419.05	0.460215	0.250775	1.83517	0.0664803	0.268394
ENSG00000067601.8	8.65856	-1.20917	1.21807	-0.99269	0.320861	NA
ENSG00000067606.17	492.238	0.464617	0.274322	1.69369	0.0903234	0.315966
ENSG00000067704.10	1424.45	-0.667128	0.266471	-2.50356	0.0122949	0.0970564
ENSG00000067715.14	43.737	0.480626	0.604268	0.795385	0.42639	0.702528
ENSG00000067798.16	2.47004	-0.383399	2.14591	-0.178665	0.858201	NA
ENSG00000067829.19	681.066	0.122768	0.29886	0.410787	0.681229	0.859725
ENSG00000067836.13	284.49	-0.0321662	0.384308	-0.0836992	0.933296	0.976007
ENSG00000067840.12	226.377	0.55778	0.379697	1.46901	0.14183	0.405451
ENSG00000067842.17	5.62263	1.33888	1.54192	0.868316	0.385221	NA
ENSG00000067900.8	899.059	-0.0228659	0.268979	-0.0850099	0.932254	0.975484
ENSG00000067955.15	1044.59	0.583972	0.263517	2.21607	0.0266868	0.155914
ENSG00000067992.15	1441.79	-0.539936	0.273458	-1.97447	0.048328	0.223554
ENSG00000068001.14	278.988	-0.544093	0.332257	-1.63756	0.101512	0.336723
ENSG00000068024.16	163.134	-0.278031	0.360525	-0.771184	0.440598	0.712799
ENSG00000068028.17	299.298	0.293809	0.356058	0.825172	0.409274	0.689046
ENSG00000068078.18	1516.69	0.383973	0.293015	1.31042	0.190054	0.47624
ENSG00000068079.8	69.2629	-0.104081	0.54689	-0.190314	0.849063	0.940232
ENSG00000068097.15	475.889	0.291209	0.288693	1.00871	0.313112	0.606624
ENSG00000068120.15	1149.23	0.0452776	0.290786	0.155708	0.876263	0.952763
ENSG00000068137.15	412.715	-0.105327	0.412741	-0.255189	0.798577	0.917075
ENSG00000068305.17	779.727	-0.275984	0.264121	-1.04491	0.296063	0.588969
ENSG00000068308.13	1569.68	0.857961	0.256534	3.34443	0.000825	0.0157474
ENSG00000068323.17	752.82	0.419286	0.262609	1.59662	0.11035	0.352361
ENSG00000068354.16	259.625	0.47891	0.315511	1.51789	0.129043	0.385765
ENSG00000068366.20	606.696	0.0414458	0.314318	0.131859	0.895096	0.960923
ENSG00000068383.19	390.042	-0.601498	0.303728	-1.98038	0.0476606	0.221891
ENSG00000068394.11	539.387	0.644969	0.327605	1.96874	0.0489829	0.225491
ENSG00000068400.13	767.651	0.442706	0.284167	1.55791	0.119255	0.368932
ENSG00000068438.15	553.499	-0.0327366	0.278941	-0.117361	0.906574	0.964862
ENSG00000068489.13	1125.57	0.392529	0.248526	1.57943	0.114238	0.360232
ENSG00000068615.19	122.646	0.614797	0.399548	1.53873	0.123871	0.377297
ENSG00000068650.18	589.324	-0.284191	0.266732	-1.06546	0.28667	0.578758
ENSG00000068654.16	2096.2	0.504302	0.25674	1.96426	0.0495004	0.226432
ENSG00000068697.7	1889.66	0.673417	0.239633	2.81021	0.00495097	0.0545972
ENSG00000068724.17	223.513	-0.238798	0.339887	-0.70258	0.482318	0.740782
ENSG00000068745.15	1223.48	0.928389	0.252388	3.67842	0.000235	0.00662658
ENSG00000068784.13	354.14	-0.448345	0.303225	-1.47859	0.139251	0.401619
ENSG00000068796.18	1650.57	0.361533	0.261797	1.38097	0.167288	0.442723
ENSG00000068831.19	29.3237	-1.13703	0.702011	-1.61967	0.105303	0.343084
ENSG00000068878.15	1621.5	0.181931	0.271681	0.669647	0.503083	0.752644
ENSG00000068885.15	309.18	-0.418143	0.327734	-1.27586	0.202005	0.492553
ENSG00000068903.20	439.387	0.290448	0.309915	0.937185	0.348663	0.63989
ENSG00000068912.14	817.771	0.846435	0.258746	3.2713	0.00107055	0.0187637
ENSG00000068971.14	167.114	1.15265	0.363036	3.17502	0.00149824	0.0239655
ENSG00000068976.14	13.2972	0.841735	1.02037	0.824929	0.409412	NA
ENSG00000069011.16	481.787	-0.296658	0.324589	-0.91395	0.360743	0.651541
ENSG00000069020.18	185.534	0.651308	0.36648	1.7772	0.0755358	0.289202
ENSG00000069122.19	8.88137	-1.26757	1.2546	-1.01034	0.312334	NA
ENSG00000069188.17	177.201	-1.17006	0.374497	-3.12436	0.00178193	0.0274071
ENSG00000069248.12	2334.96	0.581645	0.244158	2.38225	0.0172074	0.119127
ENSG00000069275.13	5938.31	-0.721212	0.256994	-2.80634	0.00501084	0.0549096
ENSG00000069329.18	1658.22	-0.084424	0.266033	-0.317344	0.750982	0.896178
ENSG00000069345.12	1110.96	0.394664	0.267139	1.47737	0.139575	0.402007
ENSG00000069399.15	31.8731	0.543995	0.657835	0.826947	0.408267	0.688661
ENSG00000069424.15	266.632	0.426059	0.348286	1.2233	0.221216	0.513299
ENSG00000069431.11	10.1944	-0.352471	1.09959	-0.320548	0.748553	NA
ENSG00000069482.7	613.129	-0.240762	0.345348	-0.697157	0.485705	0.742887
ENSG00000069493.15	58.6303	-0.015342	0.572798	-0.0267844	0.978632	0.993219
ENSG00000069509.6	416.779	-0.00339024	0.283408	-0.0119624	0.990456	0.996545
ENSG00000069535.14	70.7228	-0.265225	0.516376	-0.513627	0.607513	0.820091
ENSG00000069667.16	129.868	0.45467	0.467251	0.973074	0.330516	0.623785
ENSG00000069696.7	7.75163	0.0533477	1.27054	0.0419884	0.966508	NA
ENSG00000069702.11	339.216	0.0874922	0.300691	0.29097	0.771074	0.903829
ENSG00000069812.11	27.4335	0.506992	0.69452	0.72999	0.465397	0.730822
ENSG00000069849.11	1768.23	-0.338461	0.252721	-1.33927	0.180484	0.462207
ENSG00000069869.16	279.312	0.214254	0.337299	0.635205	0.525295	0.769495
ENSG00000069943.10	69.9531	-0.0899593	0.48439	-0.185717	0.852667	0.941614
ENSG00000069956.12	580.091	0.503081	0.297139	1.69308	0.0904397	0.316045
ENSG00000069966.18	154.099	0.374327	0.368327	1.01629	0.309491	0.602335
ENSG00000069974.16	76.1873	0.276278	0.455604	0.606399	0.54425	0.781553
ENSG00000069998.12	704.187	-0.585221	0.287236	-2.03742	0.0416081	0.205551
ENSG00000070010.19	1023.54	0.360529	0.264707	1.36199	0.1732	0.450149
ENSG00000070018.9	1043.76	0.115904	0.288569	0.40165	0.687941	0.863787
ENSG00000070047.13	2010.54	0.428164	0.287226	1.49069	0.136043	0.397024
ENSG00000070061.15	1630.78	-0.106174	0.243924	-0.435276	0.663362	0.849358
ENSG00000070081.17	972.068	0.0849046	0.260456	0.325985	0.744436	0.893911
ENSG00000070087.14	1872.86	-0.97993	0.250427	-3.91304	9.11e-05	0.00330767
ENSG00000070159.14	463.228	0.312113	0.286886	1.08793	0.276625	0.568822
ENSG00000070182.21	306.888	0.399411	0.339014	1.17816	0.238735	0.53077
ENSG00000070214.16	760.287	-1.02312	0.312725	-3.27164	0.00106926	0.0187627
ENSG00000070269.14	199.663	0.696756	0.358599	1.94299	0.0520169	0.232941
ENSG00000070366.14	498.463	-0.250749	0.27819	-0.901356	0.367399	0.656712
ENSG00000070367.16	1421.91	0.186246	0.271686	0.685518	0.493017	0.746604
ENSG00000070371.16	211.503	-0.893102	0.375321	-2.37956	0.0173331	0.119616
ENSG00000070388.11	14.6619	2.97544	1.10098	2.70254	0.00688111	0.0670721
ENSG00000070404.10	138.241	0.595465	0.453705	1.31245	0.189368	0.475564
ENSG00000070413.20	1584.06	0.191136	0.285425	0.669655	0.503078	0.752644
ENSG00000070423.18	1167.54	0.628133	0.263866	2.3805	0.0172894	0.119441
ENSG00000070444.15	419.648	-0.361177	0.290044	-1.24525	0.21304	0.503519
ENSG00000070476.15	599.396	-0.494241	0.281086	-1.75833	0.0786922	0.294177
ENSG00000070495.14	517.563	0.913921	0.308168	2.96565	0.00302041	0.0389297
ENSG00000070501.12	302.676	0.27797	0.307092	0.905169	0.365376	0.654888
ENSG00000070526.15	3.00695	-1.47444	2.08958	-0.705616	0.480427	NA
ENSG00000070540.13	95.2808	0.511988	0.421635	1.21429	0.224637	0.516348
ENSG00000070601.10	21.5555	-0.910859	0.922959	-0.98689	0.323697	0.617951
ENSG00000070610.14	798.731	0.382014	0.264082	1.44657	0.148017	0.413774
ENSG00000070614.15	978.118	-0.424777	0.262898	-1.61575	0.106149	0.344151
ENSG00000070669.17	1229.84	0.666316	0.257613	2.58651	0.00969544	0.0838066
ENSG00000070718.12	562.196	0.270549	0.273779	0.988201	0.323054	0.617889
ENSG00000070731.11	18.1991	0.442815	0.867284	0.510577	0.609647	0.821016
ENSG00000070756.16	9277.16	-0.125371	0.268817	-0.466381	0.640943	0.838786
ENSG00000070759.17	177.709	0.294852	0.350459	0.84133	0.400163	0.682305
ENSG00000070761.8	609.935	0.406545	0.271213	1.49899	0.133877	0.39379
ENSG00000070770.9	704.686	-1.07993	0.261823	-4.12467	3.71e-05	0.00167913
ENSG00000070778.13	190.632	0.482174	0.341819	1.41061	0.158359	0.431413
ENSG00000070785.17	466.997	-0.637391	0.294178	-2.16668	0.0302589	0.169736
ENSG00000070814.22	3730.68	0.465842	0.264083	1.764	0.0777324	0.292553
ENSG00000070831.17	3831.21	0.39021	0.232302	1.67975	0.0930055	0.320393
ENSG00000070882.13	857.907	0.620996	0.268993	2.30859	0.0209663	0.13531
ENSG00000070886.12	31.2055	0.355369	0.664699	0.534631	0.592905	0.812644
ENSG00000070950.10	728.123	0.212141	0.274611	0.772513	0.439811	0.712343
ENSG00000070961.15	1429.16	0.534925	0.248886	2.14928	0.0316122	0.175065
ENSG00000071051.14	496.221	-0.139265	0.275064	-0.5063	0.612646	0.822563
ENSG00000071054.16	2130.91	0.0774469	0.238641	0.324533	0.745535	0.894425
ENSG00000071073.13	230.602	0.422594	0.334409	1.2637	0.206337	0.496597
ENSG00000071082.11	6015.51	0.181375	0.252331	0.718796	0.472267	0.734911
ENSG00000071127.17	2055.25	0.411577	0.246351	1.6707	0.0947818	0.322938
ENSG00000071189.21	573.36	0.554458	0.297608	1.86305	0.0624556	0.258286
ENSG00000071205.12	154.349	0.342234	0.366766	0.933114	0.350761	0.641879
ENSG00000071242.12	234.828	-0.170055	0.350397	-0.48532	0.627449	0.831729
ENSG00000071243.16	260.502	-0.357984	0.321552	-1.1133	0.26558	0.557901
ENSG00000071246.11	245.928	-1.18732	0.40817	-2.90888	0.00362724	0.0442071
ENSG00000071282.12	346.358	0.329215	0.322112	1.02205	0.306757	0.599537
ENSG00000071462.12	1225.32	0.957468	0.273184	3.50485	0.000457	0.0105349
ENSG00000071537.14	660.109	-0.35286	0.294906	-1.19652	0.231495	0.523716
ENSG00000071539.14	1545.71	0.201526	0.243385	0.828012	0.407664	0.688012
ENSG00000071553.17	2030.98	0.588997	0.266533	2.20985	0.0271156	0.157631
ENSG00000071564.17	1162.97	0.0770835	0.253075	0.304587	0.76068	0.899711
ENSG00000071575.11	477.14	-0.949294	0.312443	-3.03829	0.00237924	0.033376
ENSG00000071626.17	1973.85	-0.0524339	0.26504	-0.197834	0.843175	0.937163
ENSG00000071655.18	1237.55	-0.607657	0.335792	-1.80962	0.0703545	0.278124
ENSG00000071794.16	1861.78	0.226617	0.268254	0.844786	0.39823	0.68117
ENSG00000071859.15	768.496	0.36501	0.319432	1.14269	0.253168	0.545985
ENSG00000071889.16	326.279	-0.67263	0.383858	-1.75229	0.0797238	0.296568
ENSG00000071894.17	1802.17	0.0478946	0.257235	0.18619	0.852295	0.941614
ENSG00000071967.12	207.786	0.968876	0.344912	2.80905	0.0049688	0.0547144
ENSG00000071994.11	1076.71	-0.105169	0.253802	-0.414375	0.678599	0.857903
ENSG00000072041.17	537.398	-1.13527	0.351913	-3.22599	0.0012554	0.0209637
ENSG00000072042.13	882.414	0.606858	0.270296	2.24516	0.0247578	0.149531
ENSG00000072062.14	1041.53	0.55272	0.25166	2.19629	0.0280711	0.161395
ENSG00000072071.16	1173.51	-0.0600599	0.256419	-0.234226	0.81481	0.924834
ENSG00000072110.13	1301.61	-0.0712049	0.251061	-0.283616	0.776705	0.907209
ENSG00000072121.16	530.807	0.638993	0.288067	2.21821	0.0265405	0.155418
ENSG00000072133.11	91.4485	-0.596327	0.452062	-1.31913	0.187127	0.472433
ENSG00000072134.15	393.323	-0.0945529	0.286338	-0.330214	0.741238	0.892437
ENSG00000072135.13	283.141	0.0421298	0.352609	0.11948	0.904895	0.964155
ENSG00000072163.19	54.2513	0.362644	0.570529	0.635628	0.525019	0.769366
ENSG00000072195.15	217.187	-0.916153	0.429076	-2.13517	0.0327467	0.178893
ENSG00000072201.14	70.112	0.954749	0.488057	1.95623	0.0504386	0.228924
ENSG00000072210.19	678.03	-0.205775	0.277379	-0.741854	0.458176	0.725027
ENSG00000072274.13	3387.98	1.25848	0.341403	3.68618	0.000228	0.00649012
ENSG00000072310.17	435.09	-0.16459	0.32018	-0.514054	0.607214	0.820066
ENSG00000072364.13	1385.58	-0.646246	0.354354	-1.82373	0.068193	0.272772
ENSG00000072401.15	448.254	0.139871	0.332847	0.420226	0.67432	0.855895
ENSG00000072415.9	472.873	-0.30278	0.292991	-1.03341	0.301413	0.593885
ENSG00000072422.17	198.201	-1.41732	0.362245	-3.9126	9.13e-05	0.00330767
ENSG00000072501.18	5506.15	-1.43121	0.243947	-5.8669	4.44e-09	1.12e-06
ENSG00000072506.13	1105.53	0.853285	0.282196	3.02373	0.00249681	0.0344609
ENSG00000072518.20	1273.51	0.856214	0.267977	3.1951	0.00139784	0.0228159
ENSG00000072571.20	643.861	-0.0361687	0.264019	-0.136993	0.891037	0.958747
ENSG00000072609.17	492.132	0.500059	0.276188	1.81057	0.0702068	0.277684
ENSG00000072657.9	6.31463	0.236176	1.43005	0.165152	0.868824	NA
ENSG00000072682.18	208.05	0.236833	0.330629	0.716309	0.4738	0.735523
ENSG00000072736.19	771.361	0.328395	0.258168	1.27202	0.203367	0.493454
ENSG00000072756.17	184.638	0.0535292	0.390395	0.137116	0.890939	0.958747
ENSG00000072778.20	1490.44	1.00791	0.257893	3.90826	9.3e-05	0.00334758
ENSG00000072786.13	341.907	-0.114913	0.300399	-0.382533	0.702066	0.871778
ENSG00000072803.17	1037.49	0.562903	0.274285	2.05226	0.0401446	0.201246
ENSG00000072818.12	7.24176	-0.552934	1.33557	-0.414006	0.678869	NA
ENSG00000072832.15	51.4907	-0.742267	0.575202	-1.29045	0.196896	0.485832
ENSG00000072840.13	209.962	-0.943888	0.360561	-2.61783	0.00884903	0.0794229
ENSG00000072849.11	463.522	0.295261	0.277513	1.06395	0.28735	0.579813
ENSG00000072858.10	7.88677	-0.60094	1.26963	-0.47332	0.635985	NA
ENSG00000072864.15	667.109	-0.0184006	0.265222	-0.0693782	0.944689	0.980737
ENSG00000072954.7	119.4	0.811231	0.393677	2.06065	0.0393362	0.199118
ENSG00000072958.8	1031.94	0.331722	0.276544	1.19953	0.230323	0.52223
ENSG00000073008.15	814.338	0.709067	0.325577	2.17788	0.0294151	0.166788
ENSG00000073050.12	333.775	0.0954028	0.331392	0.287885	0.773435	0.90513
ENSG00000073060.16	953.967	-0.895748	0.294942	-3.03703	0.00238921	0.0334005
ENSG00000073111.14	5754.96	0.573583	0.230014	2.49368	0.0126426	0.0988764
ENSG00000073150.14	159.634	-1.60703	0.414634	-3.87578	0.000106	0.00368273
ENSG00000073169.14	831.245	0.438528	0.304898	1.43828	0.150356	0.417544
ENSG00000073331.18	108.279	0.428055	0.430687	0.993888	0.320277	0.6149
ENSG00000073350.14	465.513	0.562152	0.289079	1.94463	0.0518198	0.232424
ENSG00000073417.15	436.396	0.486168	0.293396	1.65704	0.0975117	0.32914
ENSG00000073464.12	86.4376	-0.580303	0.444044	-1.30686	0.19126	0.477867
ENSG00000073536.18	530.098	0.0839861	0.283754	0.295982	0.767244	0.901634
ENSG00000073578.17	3687.88	0.635495	0.252364	2.51817	0.0117967	0.0946474
ENSG00000073584.20	1742.19	-1.12016	0.247696	-4.52231	6.12e-06	0.000469
ENSG00000073598.6	7.24499	1.02896	1.39991	0.735024	0.462325	NA
ENSG00000073605.18	77.5944	-0.536289	0.453107	-1.18358	0.236578	0.528062
ENSG00000073614.13	1139.92	-0.0391992	0.278668	-0.140666	0.888134	0.958304
ENSG00000073670.14	203.044	-0.822274	0.343919	-2.3909	0.0168072	0.117266
ENSG00000073711.11	190.153	-0.239786	0.391974	-0.611738	0.540711	0.779133
ENSG00000073712.15	551.592	-0.373853	0.293398	-1.27422	0.202585	0.492874
ENSG00000073737.16	3.23026	3.65036	2.42663	1.50429	0.132507	NA
ENSG00000073756.12	18.886	2.26118	0.970578	2.32972	0.0198208	0.1306
ENSG00000073792.16	1098.31	-0.128127	0.24942	-0.513698	0.607463	0.820091
ENSG00000073803.14	303.971	0.282202	0.302036	0.934331	0.350133	0.641294
ENSG00000073849.15	269.569	-0.168314	0.337263	-0.499059	0.617737	0.826187
ENSG00000073861.3	4.11717	0.153889	1.84014	0.0836292	0.933351	NA
ENSG00000073910.22	82.171	0.144185	0.454798	0.317031	0.75122	0.896391
ENSG00000073921.18	1449.12	-0.746306	0.256225	-2.9127	0.00358318	0.0438429
ENSG00000073969.18	1298.07	0.827079	0.264325	3.12903	0.00175387	0.0270576
ENSG00000074047.21	279.145	-1.70562	0.385476	-4.4247	9.66e-06	0.000647
ENSG00000074054.18	1033.82	0.0660586	0.266064	0.248281	0.803917	0.919766
ENSG00000074071.15	1928.46	0.167528	0.331837	0.504851	0.613664	0.823022
ENSG00000074181.9	470.017	-2.22789	0.3837	-5.80635	6.39e-09	1.54e-06
ENSG00000074201.9	1749.16	-0.618276	0.248724	-2.4858	0.0129262	0.0999
ENSG00000074211.14	173.832	0.402668	0.361815	1.11291	0.265748	0.558007
ENSG00000074219.14	435.395	-0.986501	0.336984	-2.92745	0.00341759	0.042578
ENSG00000074266.21	738.486	0.879237	0.290895	3.02253	0.00250675	0.0345354
ENSG00000074317.11	16.1253	-0.909831	0.917939	-0.991167	0.321604	0.616668
ENSG00000074319.13	1142.34	0.550208	0.248097	2.21772	0.0265742	0.155496
ENSG00000074356.17	1439.04	0.798228	0.244082	3.27032	0.00107425	0.0188069
ENSG00000074370.18	132.112	-1.57903	0.44899	-3.51685	0.000437	0.0101937
ENSG00000074410.14	191.169	-0.475542	0.42516	-1.1185	0.263352	0.555588
ENSG00000074416.14	103.694	-0.0264587	0.443113	-0.059711	0.952386	0.983517
ENSG00000074527.13	85.4155	-1.12372	0.503097	-2.23361	0.0255091	0.152133
ENSG00000074582.15	595.222	0.278234	0.288043	0.965948	0.33407	0.62658
ENSG00000074590.13	547.297	-0.402995	0.272302	-1.47996	0.138885	0.40093
ENSG00000074603.19	553.462	0.104295	0.288892	0.361018	0.718086	0.879625
ENSG00000074621.14	168.883	-1.40185	0.390178	-3.59284	0.000327	0.00832574
ENSG00000074657.13	488.453	-1.1565	0.30155	-3.83518	0.000125	0.00411806
ENSG00000074660.16	5.25575	-0.893839	1.51366	-0.590517	0.554844	NA
ENSG00000074695.6	4396.51	0.54274	0.25983	2.08883	0.0367234	0.191769
ENSG00000074696.13	3911.4	0.248656	0.236848	1.04985	0.293786	0.586568
ENSG00000074706.13	16.9597	-0.0260501	0.912558	-0.0285463	0.977226	0.992678
ENSG00000074755.15	1089.6	-0.0108351	0.250989	-0.0431695	0.965566	0.988128
ENSG00000074800.16	27769.6	0.229263	0.249468	0.919007	0.358092	0.648886
ENSG00000074842.8	884.038	0.736072	0.297745	2.47216	0.01343	0.102085
ENSG00000074855.11	142.069	-0.614852	0.483248	-1.27233	0.203255	0.493454
ENSG00000074935.14	275.802	0.28581	0.330621	0.864462	0.387334	0.672985
ENSG00000074964.17	197.726	0.306309	0.368062	0.832221	0.405284	0.685671
ENSG00000074966.11	9.34924	0.559671	1.24593	0.449199	0.653288	NA
ENSG00000075043.18	172.027	0.744326	0.359531	2.07027	0.0384272	0.196799
ENSG00000075089.9	467.195	0.498863	0.284414	1.75401	0.0794296	0.295982
ENSG00000075131.10	473.664	0.104138	0.28055	0.371193	0.710494	0.876028
ENSG00000075142.14	478.88	0.0027603	0.294614	0.00936921	0.992525	0.997001
ENSG00000075151.20	2005.31	-0.843643	0.246007	-3.42935	0.000605	0.0127343
ENSG00000075188.9	445.442	-0.0643622	0.290178	-0.221802	0.824468	0.929919
ENSG00000075213.11	36.881	-0.121968	0.659553	-0.184925	0.853288	0.941721
ENSG00000075218.19	1350.34	-0.248667	0.258335	-0.962578	0.335759	0.628079
ENSG00000075223.14	178.158	-0.168506	0.423288	-0.398088	0.690566	0.865022
ENSG00000075234.17	873.315	1.05928	0.271819	3.89699	9.74e-05	0.00348241
ENSG00000075239.14	1160.85	0.418307	0.251702	1.66191	0.09653	0.326916
ENSG00000075240.17	483.062	0.338036	0.292773	1.1546	0.248255	0.540702
ENSG00000075275.17	1411.89	-0.0570025	0.248312	-0.22956	0.818434	0.926952
ENSG00000075290.8	5.37566	-4.28339	2.03357	-2.10634	0.0351751	NA
ENSG00000075292.19	1684.48	-0.243238	0.251391	-0.967571	0.333259	0.625983
ENSG00000075303.13	157.819	-0.528134	0.376961	-1.40103	0.161205	0.43446
ENSG00000075336.12	257.591	-0.46214	0.313609	-1.47362	0.140584	0.403581
ENSG00000075340.23	697.028	-0.557992	0.287775	-1.93899	0.0525027	0.234174
ENSG00000075391.16	558.986	0.391304	0.294277	1.32971	0.183612	0.466818
ENSG00000075399.14	197.561	-0.195617	0.385122	-0.507936	0.611498	0.82153
ENSG00000075407.18	619.385	-0.429495	0.296817	-1.447	0.147896	0.413774
ENSG00000075413.18	807.164	0.109265	0.260906	0.41879	0.67537	0.856528
ENSG00000075415.13	5873.81	0.649007	0.233787	2.77606	0.00550219	0.0585103
ENSG00000075420.13	629.691	0.958421	0.305982	3.13228	0.00173456	0.0268689
ENSG00000075426.12	362.961	0.422516	0.411279	1.02732	0.304269	0.597066
ENSG00000075461.6	16.8896	-0.242565	0.894165	-0.271275	0.786179	0.910647
ENSG00000075539.15	441.564	-0.208247	0.320203	-0.65036	0.51546	0.761661
ENSG00000075568.17	833.054	-0.0469411	0.270436	-0.173576	0.862199	0.946059
ENSG00000075618.18	10077.8	1.02034	0.288825	3.53274	0.000411	0.00973487
ENSG00000075624.16	24798.2	-0.0254367	0.237468	-0.107116	0.914697	0.968353
ENSG00000075643.6	93.6028	-0.545905	0.456579	-1.19564	0.231836	0.523882
ENSG00000075651.16	127.574	0.172751	0.461439	0.374375	0.708125	0.87535
ENSG00000075673.11	12.7411	-2.34046	1.06541	-2.19677	0.0280371	NA
ENSG00000075702.18	439.191	-0.0997029	0.296825	-0.335898	0.736948	0.890287
ENSG00000075711.21	546.981	-0.461297	0.273862	-1.68442	0.0921009	0.319217
ENSG00000075785.13	3046.06	0.352996	0.256472	1.37635	0.168712	0.443632
ENSG00000075790.10	307.842	0.395045	0.320437	1.23283	0.217638	0.509354
ENSG00000075826.17	631.134	1.65463	0.268858	6.15429	7.54e-10	2.44e-07
ENSG00000075856.12	1279.27	-0.0543992	0.245887	-0.221236	0.824909	0.929919
ENSG00000075891.22	26.737	-3.04063	0.805606	-3.77434	0.00016	0.00499577
ENSG00000075914.13	294.383	0.22997	0.331619	0.693477	0.48801	0.744372
ENSG00000075945.13	308.047	-0.266911	0.307372	-0.868364	0.385195	0.670649
ENSG00000075975.16	669.55	0.0474019	0.277032	0.171106	0.86414	0.94724
ENSG00000076003.5	2628.25	0.130149	0.266102	0.489094	0.624775	0.83012
ENSG00000076043.10	521.667	0.302655	0.282088	1.07291	0.283312	0.575457
ENSG00000076053.10	329.663	0.301634	0.319444	0.944245	0.345044	0.637258
ENSG00000076067.13	766.191	-0.124961	0.276688	-0.451631	0.651535	0.844378
ENSG00000076108.11	4994.96	0.414418	0.230755	1.79592	0.0725072	0.282931
ENSG00000076201.15	783.946	0.407589	0.264281	1.54225	0.123012	0.375736
ENSG00000076242.16	698	0.513272	0.266159	1.92844	0.0538004	0.237177
ENSG00000076248.11	1671.26	-0.290716	0.286752	-1.01383	0.310666	0.603612
ENSG00000076258.10	21.4003	-0.0493434	0.806655	-0.0611704	0.951224	0.982981
ENSG00000076321.11	274.628	0.50518	0.323441	1.56189	0.118313	0.3668
ENSG00000076344.16	5.18585	-0.582892	1.60117	-0.364042	0.715826	NA
ENSG00000076351.13	429.88	0.141566	0.283082	0.500087	0.617014	0.825705
ENSG00000076356.7	475.095	-0.16183	0.305079	-0.530452	0.595798	0.812943
ENSG00000076382.17	1574.41	0.282787	0.244641	1.15593	0.24771	0.540136
ENSG00000076513.17	619.942	-0.396392	0.266659	-1.48651	0.137144	0.39843
ENSG00000076554.15	985.667	0.530211	0.27216	1.94816	0.0513961	0.231549
ENSG00000076555.15	240.793	-1.04111	0.402995	-2.58342	0.00978271	0.0841302
ENSG00000076604.15	1275.13	0.712647	0.253416	2.81216	0.00492101	0.0543457
ENSG00000076641.4	115.978	-1.18393	0.422913	-2.79945	0.00511892	0.0556816
ENSG00000076650.7	227.111	0.250737	0.324148	0.773528	0.43921	0.711953
ENSG00000076662.10	62.1641	-0.793516	0.550822	-1.4406	0.149697	0.416399
ENSG00000076685.18	876.985	0.275968	0.255216	1.08131	0.279558	0.572036
ENSG00000076706.17	278.533	-2.60509	0.353403	-7.37145	1.69e-13	1.51e-10
ENSG00000076716.9	838.631	0.248787	0.293591	0.847394	0.396775	0.679652
ENSG00000076770.14	202.763	-1.58963	0.374475	-4.24496	2.19e-05	0.0011496
ENSG00000076826.9	403.182	0.390514	0.325358	1.20026	0.23004	0.521775
ENSG00000076864.19	79.2073	0.0600299	0.470444	0.127603	0.898463	0.96216
ENSG00000076924.12	1004.67	0.679437	0.25948	2.61846	0.00883284	0.0793285
ENSG00000076928.18	607.743	0.219896	0.305895	0.718859	0.472228	0.734911
ENSG00000076944.16	182.259	0.694103	0.353012	1.96623	0.0492718	0.225881
ENSG00000076984.17	835.255	0.540188	0.267444	2.01982	0.0434026	0.210548
ENSG00000077009.13	9.09388	0.331603	1.18267	0.280385	0.779182	NA
ENSG00000077044.10	737.02	0.693268	0.267478	2.59187	0.00954555	0.0831015
ENSG00000077063.11	120.452	0.189218	0.411584	0.459731	0.645709	0.841238
ENSG00000077092.19	23.7366	-1.01988	0.793277	-1.28565	0.198565	0.488173
ENSG00000077097.15	2223.94	-0.0831985	0.247162	-0.336615	0.736407	0.889896
ENSG00000077147.16	3325.88	0.0329274	0.253452	0.129916	0.896633	0.961752
ENSG00000077150.20	568.921	1.38395	0.343099	4.03368	5.49e-05	0.00229232
ENSG00000077152.11	590.937	0.725159	0.272537	2.66078	0.0077961	0.07277
ENSG00000077157.22	216.257	0.217117	0.332202	0.653569	0.51339	0.760451
ENSG00000077232.18	1314.52	-0.193744	0.271597	-0.713348	0.47563	0.736414
ENSG00000077235.18	2290.18	-0.293235	0.246736	-1.18846	0.234653	0.526255
ENSG00000077238.14	109.515	-0.268137	0.409175	-0.655311	0.512267	0.759752
ENSG00000077254.14	1488.42	0.57895	0.258954	2.23573	0.0253697	0.151719
ENSG00000077264.15	39.2976	0.641357	0.606888	1.0568	0.290604	0.583359
ENSG00000077274.9	47.3306	0.120595	0.56226	0.214482	0.830171	0.932075
ENSG00000077312.9	1410.55	0.163139	0.284769	0.572882	0.566725	0.795681
ENSG00000077348.9	377.716	0.632935	0.343545	1.84237	0.0654217	0.266082
ENSG00000077380.15	858.977	-0.118591	0.254441	-0.466083	0.641156	0.838902
ENSG00000077454.16	445.563	0.496709	0.313455	1.58462	0.113052	0.35768
ENSG00000077458.13	455.804	-0.387846	0.298653	-1.29865	0.194063	0.48186
ENSG00000077463.15	314.161	0.621596	0.336043	1.84975	0.0643489	0.263357
ENSG00000077514.9	1175.22	0.977959	0.260714	3.75108	0.000176	0.00530882
ENSG00000077522.13	190.474	0.965309	0.385722	2.5026	0.0123284	0.0972703
ENSG00000077549.19	2340.53	0.181399	0.244702	0.741306	0.458508	0.725477
ENSG00000077585.14	163.37	0.567754	0.365185	1.5547	0.120017	0.370342
ENSG00000077616.11	295.391	-0.413215	0.366506	-1.12744	0.259555	0.552098
ENSG00000077684.16	532.278	-0.0544221	0.273326	-0.199111	0.842176	0.937026
ENSG00000077713.19	114.932	-0.617677	0.395462	-1.56191	0.118309	0.3668
ENSG00000077721.16	1247.8	0.431938	0.261522	1.65164	0.098609	0.330826
ENSG00000077782.21	1338.53	0.300233	0.254971	1.17752	0.238989	0.531165
ENSG00000077935.17	4.43384	1.46678	1.77982	0.824118	0.409873	NA
ENSG00000077942.19	1571.95	-0.423868	0.306885	-1.38119	0.167219	0.442723
ENSG00000077943.8	32.3828	-2.21959	0.774417	-2.86614	0.00415508	0.0484521
ENSG00000078018.20	53.0885	-1.27967	0.565319	-2.26362	0.0235976	0.145703
ENSG00000078043.16	292.778	0.431201	0.335796	1.28411	0.199102	0.48886
ENSG00000078053.17	93.3977	0.973488	0.462703	2.10391	0.035386	0.187711
ENSG00000078061.13	541.72	0.251053	0.275511	0.911227	0.362176	0.652862
ENSG00000078070.13	438.312	0.884811	0.281331	3.14509	0.00166038	0.0261427
ENSG00000078081.8	113.77	1.19237	0.405633	2.93954	0.00328704	0.0414866
ENSG00000078114.18	131.716	-1.17781	0.418208	-2.81634	0.00485748	0.0539102
ENSG00000078124.12	570.248	0.122786	0.304174	0.403669	0.686456	0.863239
ENSG00000078140.14	1977.78	0.077995	0.259842	0.300163	0.764053	0.900183
ENSG00000078142.13	381.351	0.904746	0.290883	3.11034	0.0018687	0.0283684
ENSG00000078177.14	280.759	-0.82944	0.349748	-2.37154	0.0177144	0.121146
ENSG00000078237.7	307.753	0.646173	0.320362	2.01701	0.0436949	0.211234
ENSG00000078246.17	581.337	0.0088302	0.267814	0.0329714	0.973697	0.991112
ENSG00000078269.15	713.453	0.567831	0.274508	2.06855	0.0385888	0.197307
ENSG00000078304.19	980.601	0.056615	0.26138	0.216601	0.828519	0.931675
ENSG00000078319.9	31.5052	-0.346022	0.679634	-0.50913	0.610661	0.821277
ENSG00000078369.18	4829.62	0.271291	0.2342	1.15837	0.246712	0.539584
ENSG00000078399.19	217.774	-0.252166	0.344353	-0.732287	0.463993	0.729448
ENSG00000078401.7	4.27301	1.0084	1.72189	0.585634	0.558121	NA
ENSG00000078403.17	373.827	0.268642	0.290554	0.924587	0.355181	0.646696
ENSG00000078487.17	29.9935	-0.336779	0.691659	-0.486915	0.626319	0.83107
ENSG00000078549.14	24.7424	-0.598891	0.800751	-0.747912	0.454513	0.722481
ENSG00000078618.21	2585.36	0.328011	0.240055	1.3664	0.171814	0.447606
ENSG00000078668.14	1617.4	-0.0607112	0.256792	-0.236422	0.813105	0.92374
ENSG00000078674.17	1681.67	0.2527	0.255857	0.987659	0.32332	0.617951
ENSG00000078687.17	520.323	0.764928	0.272713	2.80489	0.00503343	0.0550669
ENSG00000078699.22	678.42	0.70018	0.263932	2.65288	0.00798084	0.0740142
ENSG00000078747.15	1120.28	0.253271	0.27845	0.909573	0.363048	0.653462
ENSG00000078795.16	40.4235	0.982281	0.613255	1.60175	0.109211	0.349826
ENSG00000078804.13	132.183	0.264321	0.391002	0.676009	0.499035	0.750327
ENSG00000078808.18	1976.38	0.374545	0.27353	1.3693	0.170906	0.446452
ENSG00000078814.17	7.45347	0.951226	1.35002	0.704602	0.481058	NA
ENSG00000078900.15	421.634	0.0812443	0.296424	0.274081	0.784022	0.909882
ENSG00000078902.16	987.363	0.978845	0.278871	3.51003	0.000448	0.0103859
ENSG00000078967.13	186.26	0.325093	0.36317	0.895155	0.370704	0.659783
ENSG00000079101.16	9.11372	-1.74351	1.2255	-1.4227	0.154823	NA
ENSG00000079102.16	36.9141	-0.854785	0.620196	-1.37825	0.168126	0.443165
ENSG00000079134.12	587.287	0.606524	0.271065	2.23756	0.0252496	0.151278
ENSG00000079150.18	75.7478	-0.0824168	0.534224	-0.154274	0.877394	0.953418
ENSG00000079156.17	285.04	0.498892	0.317002	1.57378	0.115538	0.362227
ENSG00000079215.14	569.327	0.491924	0.298527	1.64784	0.0993854	0.331925
ENSG00000079246.16	5119.84	-0.150445	0.239816	-0.627335	0.53044	0.772899
ENSG00000079257.8	108.422	-0.187688	0.412903	-0.454557	0.649428	0.843767
ENSG00000079277.21	511.912	0.644002	0.278003	2.31653	0.0205292	0.133602
ENSG00000079308.19	124.332	-1.1392	0.465118	-2.44928	0.0143142	0.106193
ENSG00000079313.15	761.597	0.516173	0.298044	1.73187	0.0832972	0.303119
ENSG00000079332.15	2051.56	0.586186	0.256974	2.28111	0.022542	0.141399
ENSG00000079335.20	98.6104	-0.212178	0.484431	-0.437995	0.66139	0.848536
ENSG00000079337.16	69.9106	-0.309144	0.544056	-0.568221	0.569885	0.797305
ENSG00000079387.14	556.455	0.00801929	0.283783	0.0282586	0.977456	0.992678
ENSG00000079393.20	2.41271	-2.99953	2.55811	-1.17256	0.240974	NA
ENSG00000079432.7	1000.7	-0.0418983	0.277038	-0.151237	0.879789	0.95488
ENSG00000079435.10	78.7788	0.81774	0.4877	1.67673	0.0935957	0.321102
ENSG00000079459.13	732.989	-0.217848	0.271615	-0.802048	0.422525	0.699606
ENSG00000079462.7	335.315	-0.650443	0.369241	-1.76157	0.0781427	0.292982
ENSG00000079482.13	97.643	0.464683	0.458528	1.01342	0.310858	0.603679
ENSG00000079616.13	1830.56	0.876743	0.244166	3.59077	0.00033	0.00837687
ENSG00000079691.18	250.166	0.296851	0.316013	0.939362	0.347545	0.639227
ENSG00000079739.17	736.607	-0.0409258	0.276146	-0.148203	0.882182	0.956124
ENSG00000079785.15	2733.47	0.40618	0.241838	1.67955	0.0930439	0.320393
ENSG00000079805.17	2580.28	0.625403	0.244529	2.55758	0.0105405	0.0882495
ENSG00000079819.19	2249.39	-0.274798	0.237527	-1.15691	0.247309	0.539876
ENSG00000079841.18	18.0111	0.150413	0.8396	0.179148	0.857822	0.943922
ENSG00000079931.15	282.752	0.263545	0.336045	0.784256	0.43289	0.707217
ENSG00000079950.14	1143.64	0.68741	0.259147	2.65258	0.00798784	0.0740142
ENSG00000079974.17	271.285	-0.878059	0.346558	-2.53366	0.0112878	0.0923684
ENSG00000079999.14	853.023	0.136257	0.265071	0.51404	0.607224	0.820066
ENSG00000080031.10	25.6231	2.22084	0.826398	2.68737	0.00720174	0.0691647
ENSG00000080166.16	4.9814	2.69332	1.86668	1.44284	0.149065	NA
ENSG00000080189.15	654.162	-0.116936	0.3422	-0.341719	0.732562	0.888075
ENSG00000080200.10	340.175	-0.329565	0.326073	-1.01071	0.312154	0.605591
ENSG00000080224.17	11.7329	-1.60275	1.08685	-1.47467	0.140301	NA
ENSG00000080298.15	145.514	0.152516	0.437866	0.348317	0.727602	0.885452
ENSG00000080345.18	1661.11	0.255178	0.301036	0.847667	0.396623	0.679609
ENSG00000080371.6	1167.63	0.606179	0.291593	2.07886	0.0376304	0.195018
ENSG00000080493.17	60.2522	0.483466	0.50192	0.963233	0.335431	0.627946
ENSG00000080503.24	942.19	0.414798	0.252263	1.64431	0.100112	0.333546
ENSG00000080546.13	398.535	-0.38129	0.308128	-1.23744	0.215924	0.506902
ENSG00000080561.13	99.8589	-0.780542	0.439361	-1.77654	0.075644	0.289324
ENSG00000080573.7	25.3601	1.08134	0.829585	1.30347	0.192413	0.479801
ENSG00000080603.17	1478.4	-0.278241	0.243511	-1.14262	0.253195	0.545985
ENSG00000080608.10	664.59	0.0269042	0.304263	0.088424	0.92954	0.974387
ENSG00000080644.16	21.4257	-0.691671	0.802978	-0.861382	0.389028	0.673723
ENSG00000080709.16	3.84672	0.76596	1.78746	0.428518	0.668274	NA
ENSG00000080802.18	336.054	0.641294	0.306719	2.09082	0.036544	0.191292
ENSG00000080815.19	415.7	-0.785534	0.287398	-2.73326	0.00627107	0.0634033
ENSG00000080819.9	334.669	-2.14762	0.307914	-6.97475	3.06e-12	2.45e-09
ENSG00000080822.17	744.257	0.474688	0.275951	1.72019	0.0853984	0.306921
ENSG00000080823.23	143.843	0.061566	0.37061	0.166121	0.868062	0.94933
ENSG00000080824.19	23362	0.198431	0.233559	0.849598	0.395549	0.678952
ENSG00000080839.12	401.017	-0.778814	0.318015	-2.44899	0.0143258	0.106193
ENSG00000080845.17	456.107	-0.128993	0.279295	-0.461854	0.644186	0.840265
ENSG00000080854.15	230.381	0.399201	0.326282	1.22349	0.221146	0.513295
ENSG00000080947.15	59.2035	-1.45961	0.550041	-2.65363	0.00796303	0.0739646
ENSG00000080986.13	638.559	0.276201	0.266225	1.03747	0.299515	0.592248
ENSG00000081014.11	243.762	0.136614	0.327658	0.416942	0.676721	0.856821
ENSG00000081019.13	317.795	-0.290875	0.32128	-0.905364	0.365273	0.654871
ENSG00000081026.19	375.702	-0.786854	0.319819	-2.46031	0.0138817	0.104119
ENSG00000081041.9	3.76536	0.764535	1.74525	0.438065	0.661339	NA
ENSG00000081052.13	44.1694	0.27783	0.605154	0.459106	0.646158	0.84141
ENSG00000081059.20	209.025	-0.620519	0.334953	-1.85255	0.0639464	0.262325
ENSG00000081087.15	423.539	0.711753	0.31461	2.26233	0.023677	0.146015
ENSG00000081138.14	8.4088	-0.918435	1.21347	-0.756868	0.449129	NA
ENSG00000081148.12	3.47574	-5.16122	2.35157	-2.19479	0.0281786	NA
ENSG00000081154.12	1835.57	0.437778	0.255296	1.71479	0.0863845	0.308943
ENSG00000081177.18	367.288	-0.497551	0.294577	-1.68903	0.0912133	0.317543
ENSG00000081181.8	315.049	1.03432	0.310628	3.32976	0.000869	0.0162269
ENSG00000081189.16	131.878	-0.755871	0.384906	-1.96378	0.0495556	0.226617
ENSG00000081307.12	615	0.193411	0.26918	0.71852	0.472437	0.734911
ENSG00000081320.11	268.34	0.397586	0.372644	1.06693	0.286002	0.578091
ENSG00000081377.17	621.592	-0.435762	0.267864	-1.6268	0.103779	0.340609
ENSG00000081386.12	347.879	-0.202608	0.33633	-0.602409	0.546902	0.783628
ENSG00000081479.15	315.066	1.01685	0.392341	2.59174	0.00954912	0.0831015
ENSG00000081665.14	160.788	-0.219131	0.390733	-0.560821	0.57492	0.800381
ENSG00000081692.12	625.42	-1.05079	0.345949	-3.03741	0.00238621	0.0333893
ENSG00000081721.12	315.328	0.983656	0.333705	2.94768	0.00320166	0.0407474
ENSG00000081760.17	402.056	-0.821508	0.290548	-2.82745	0.00469208	0.0526594
ENSG00000081791.9	439.956	0.110347	0.302375	0.364934	0.715161	0.878225
ENSG00000081803.16	111.69	-1.61259	0.437852	-3.68295	0.000231	0.00654838
ENSG00000081818.4	3.17496	-3.47946	2.36493	-1.47127	0.141217	NA
ENSG00000081870.11	351.361	0.174113	0.328344	0.530277	0.59592	0.812963
ENSG00000081913.14	563.806	-0.167302	0.274336	-0.609844	0.541965	0.779861
ENSG00000081923.15	36.3377	-2.18946	0.719143	-3.04455	0.00233031	0.0331276
ENSG00000081985.12	5.23747	3.36037	1.74771	1.92273	0.0545143	NA
ENSG00000082014.16	428.13	0.0963407	0.31662	0.304278	0.760916	0.899711
ENSG00000082068.9	576.287	0.174261	0.272371	0.639791	0.522309	0.767602
ENSG00000082146.13	341.02	-0.421071	0.33371	-1.26179	0.207025	0.497501
ENSG00000082153.18	3498.83	0.145879	0.294096	0.496026	0.619876	0.827771
ENSG00000082175.15	86.7725	-0.901554	0.456176	-1.97633	0.0481172	0.22324
ENSG00000082196.20	8.95904	-1.27303	1.21087	-1.05133	0.293106	NA
ENSG00000082212.13	563.309	-0.341365	0.271115	-1.25912	0.207988	0.498122
ENSG00000082213.18	634.108	0.264969	0.26963	0.982713	0.325749	0.619543
ENSG00000082258.13	678.407	0.205151	0.305235	0.672108	0.501515	0.751678
ENSG00000082269.16	445.672	-0.0240399	0.33439	-0.0718917	0.942688	0.980131
ENSG00000082293.13	16.5291	-1.34091	0.953053	-1.40696	0.159439	0.433082
ENSG00000082397.17	806.445	-0.723043	0.280439	-2.57826	0.00993002	0.0848687
ENSG00000082438.17	220.906	0.285725	0.335029	0.852837	0.39375	0.677624
ENSG00000082458.12	626.574	-0.153215	0.288595	-0.530898	0.595489	0.81289
ENSG00000082482.13	7.89233	-0.810641	1.27124	-0.637678	0.523683	NA
ENSG00000082497.12	191.149	-0.714015	0.357564	-1.99689	0.0458376	0.216624
ENSG00000082512.15	261.985	-0.236523	0.322716	-0.732914	0.463611	0.729375
ENSG00000082515.18	419.49	0.581778	0.288332	2.01774	0.0436185	0.210957
ENSG00000082516.9	821.053	0.490188	0.314496	1.55865	0.11908	0.368468
ENSG00000082556.13	5.45282	1.82847	1.56639	1.16731	0.243084	NA
ENSG00000082641.16	3338.23	0.764672	0.25494	2.99942	0.00270498	0.036382
ENSG00000082684.16	49.3667	-2.24585	0.644931	-3.48231	0.000497	0.011158
ENSG00000082701.16	668.307	-0.663635	0.27249	-2.43545	0.0148734	0.108336
ENSG00000082781.12	745.977	0.353038	0.282294	1.2506	0.211079	0.501335
ENSG00000082805.20	1029.14	0.105083	0.250099	0.420167	0.674363	0.855895
ENSG00000082898.17	5104.36	-0.109884	0.244149	-0.450068	0.652662	0.844706
ENSG00000082996.19	329.712	-0.314271	0.295774	-1.06254	0.287992	0.580533
ENSG00000083067.22	5.32024	-4.27444	2.13769	-1.99956	0.0455473	NA
ENSG00000083093.10	210.381	-0.187581	0.329981	-0.568462	0.569721	0.79719
ENSG00000083097.14	503.364	-0.25683	0.305759	-0.839975	0.400922	0.682608
ENSG00000083099.11	602.253	-0.199786	0.275487	-0.725209	0.468324	0.733049
ENSG00000083123.15	229.991	-0.695578	0.377095	-1.84457	0.0651002	0.265218
ENSG00000083168.11	1066.41	-0.297807	0.265543	-1.1215	0.262073	0.554275
ENSG00000083223.18	198.043	-0.420194	0.363736	-1.15522	0.248001	0.540305
ENSG00000083312.17	2879.31	-0.131416	0.300498	-0.437329	0.661873	0.848618
ENSG00000083444.17	1497.59	0.0369123	0.288841	0.127795	0.898311	0.96216
ENSG00000083454.22	76.5971	1.33799	0.500531	2.67313	0.00751462	0.0711034
ENSG00000083457.12	254.526	0.285691	0.324395	0.88069	0.378486	0.66591
ENSG00000083520.15	1088.68	0.574853	0.289018	1.98899	0.0467022	0.219217
ENSG00000083535.16	193.42	0.0244285	0.347128	0.070373	0.943897	0.980536
ENSG00000083544.15	144.151	-0.419987	0.376665	-1.11501	0.264844	0.557034
ENSG00000083635.8	167.184	-0.735054	0.383072	-1.91884	0.0550044	0.24067
ENSG00000083642.19	653.436	0.103352	0.278133	0.371592	0.710197	0.875973
ENSG00000083720.13	1057.66	0.530139	0.293256	1.80777	0.0706426	0.278746
ENSG00000083750.12	284.565	1.54086	0.321656	4.7904	1.66e-06	0.000164
ENSG00000083799.17	406.84	0.494094	0.30642	1.61247	0.106859	0.345422
ENSG00000083807.10	57.1747	-0.0379815	0.54914	-0.0691655	0.944858	0.980737
ENSG00000083812.12	287.473	0.140378	0.308746	0.45467	0.649346	0.843734
ENSG00000083814.13	25.7952	-0.192349	0.764386	-0.251639	0.80132	0.918639
ENSG00000083817.9	110.373	0.299013	0.434364	0.688393	0.491205	0.746248
ENSG00000083828.16	108.658	-0.71318	0.42313	-1.68549	0.0918947	0.319039
ENSG00000083838.16	127.352	-0.379514	0.431245	-0.880043	0.378836	0.665933
ENSG00000083844.10	280.213	-0.106999	0.343786	-0.311238	0.75562	0.897974
ENSG00000083845.9	6260.49	-0.119334	0.267639	-0.445877	0.655686	0.846006
ENSG00000083857.14	2765.79	-0.131062	0.246774	-0.531101	0.595349	0.81289
ENSG00000083896.12	1151.13	-0.0574227	0.259065	-0.221654	0.824583	0.929919
ENSG00000083937.9	793.516	0.768582	0.299882	2.56295	0.0103787	0.0872801
ENSG00000084070.12	498.45	-0.671873	0.293143	-2.29197	0.0219076	0.139001
ENSG00000084072.17	1021.94	0.409032	0.268276	1.52466	0.127343	0.382961
ENSG00000084073.9	931.398	-0.163651	0.265735	-0.615842	0.537999	0.777516
ENSG00000084090.13	3529.19	0.443299	0.233419	1.89915	0.0575448	0.24746
ENSG00000084092.7	426.938	-0.23756	0.282931	-0.839638	0.401111	0.682608
ENSG00000084093.18	675.448	-0.115258	0.283906	-0.405971	0.684764	0.861753
ENSG00000084110.11	5.63904	0.0332908	1.49224	0.0223093	0.982201	NA
ENSG00000084112.15	595.985	-1.01382	0.291336	-3.4799	0.000502	0.0112094
ENSG00000084207.18	6947.93	-0.672015	0.334603	-2.0084	0.0446011	0.212962
ENSG00000084234.17	6428.38	-0.108167	0.237638	-0.455175	0.648983	0.843623
ENSG00000084444.14	386.345	0.540311	0.286585	1.88534	0.0593834	0.251643
ENSG00000084453.16	6.67769	-2.41622	1.48003	-1.63254	0.102565	NA
ENSG00000084463.8	2604.63	0.149208	0.251075	0.594277	0.552327	0.787056
ENSG00000084623.11	2458.32	-0.285367	0.25567	-1.11615	0.264357	0.556554
ENSG00000084628.10	29.9134	0.211756	0.726319	0.291547	0.770633	0.903584
ENSG00000084636.18	6.42865	-1.99502	1.56844	-1.27198	0.203381	NA
ENSG00000084652.16	1521.92	-0.175982	0.248395	-0.708476	0.47865	0.738311
ENSG00000084674.15	9.07956	0.368052	4.58719	0.0802348	0.936051	NA
ENSG00000084676.15	671.102	0.255173	0.27691	0.921499	0.35679	0.647841
ENSG00000084693.16	823.422	-1.02556	0.285737	-3.58918	0.000332	0.00838728
ENSG00000084710.14	255.161	0.172832	0.324506	0.5326	0.594311	0.81289
ENSG00000084731.15	340.677	-0.513403	0.33789	-1.51944	0.128652	0.385159
ENSG00000084733.11	2135	0.516999	0.261525	1.97686	0.048057	0.223053
ENSG00000084754.12	2562.51	0.596158	0.23741	2.51109	0.012036	0.0956587
ENSG00000084764.12	256.895	0.901999	0.321311	2.80724	0.00499676	0.0548632
ENSG00000084774.14	2728.89	-0.0769119	0.236672	-0.324972	0.745202	0.894389
ENSG00000085063.17	2044.89	0.251415	0.246114	1.02154	0.306999	0.599592
ENSG00000085117.12	56.9827	-0.650317	0.57187	-1.13718	0.255464	0.548156
ENSG00000085185.15	782.344	0.229302	0.258909	0.88565	0.375806	0.663269
ENSG00000085224.22	1607.89	0.0862173	0.28681	0.300608	0.763713	0.900158
ENSG00000085231.14	305.838	0.40667	0.322399	1.26139	0.207169	0.49753
ENSG00000085274.15	263.356	0.144964	0.332569	0.43589	0.662916	0.849358
ENSG00000085276.19	211.681	-0.684958	0.351538	-1.94846	0.0513598	0.231535
ENSG00000085365.18	804.964	0.235809	0.300743	0.784089	0.432988	0.707265
ENSG00000085377.14	869.104	0.235324	0.282523	0.832936	0.404881	0.685294
ENSG00000085382.12	340.012	0.0553292	0.354786	0.155951	0.876072	0.952751
ENSG00000085415.16	1020.1	0.440993	0.270845	1.62821	0.10348	0.34007
ENSG00000085433.15	330.95	0.410452	0.331485	1.23822	0.215634	0.5063
ENSG00000085449.15	637.427	-0.00307163	0.273158	-0.0112449	0.991028	0.996545
ENSG00000085465.13	77.7708	2.3855	0.562423	4.24147	2.22e-05	0.00116362
ENSG00000085491.17	709.582	-0.459859	0.269458	-1.70661	0.0878953	0.311342
ENSG00000085511.20	492.625	0.0149871	0.275676	0.0543651	0.956644	0.984169
ENSG00000085514.16	15.3833	1.59894	0.982637	1.62719	0.103696	0.340558
ENSG00000085552.17	28.7868	-0.583351	0.70576	-0.826557	0.408488	0.688748
ENSG00000085563.15	220.372	1.6081	0.411036	3.9123	9.14e-05	0.00330767
ENSG00000085644.14	536.455	0.190563	0.272352	0.699696	0.484117	0.742118
ENSG00000085662.14	1223.13	-0.0558987	0.275277	-0.203063	0.839086	0.936258
ENSG00000085719.13	1283.06	-0.209315	0.276253	-0.757692	0.448635	0.718513
ENSG00000085721.13	1358.65	0.444919	0.27559	1.61442	0.106436	0.344789
ENSG00000085733.16	4501.35	0.559134	0.266762	2.09601	0.0360817	0.189722
ENSG00000085741.13	102.496	-0.914865	0.418628	-2.18539	0.0288603	0.164378
ENSG00000085760.15	605.16	-0.468868	0.267381	-1.75356	0.0795061	0.296121
ENSG00000085788.14	855.505	-0.0143455	0.266556	-0.0538181	0.95708	0.984414
ENSG00000085831.15	197.265	-0.831246	0.335997	-2.47397	0.013362	0.101861
ENSG00000085832.17	771.373	-0.0557371	0.258484	-0.215631	0.829276	0.931939
ENSG00000085840.13	722.21	0.165768	0.260928	0.635302	0.525231	0.769495
ENSG00000085871.9	184.277	0.217701	0.354799	0.613591	0.539486	0.778614
ENSG00000085872.15	1322.54	-0.129671	0.253136	-0.51226	0.608469	0.820362
ENSG00000085978.22	442.797	0.712972	0.28016	2.54488	0.0109316	0.0906253
ENSG00000085982.13	261.906	-0.119708	0.32726	-0.365789	0.714523	0.877831
ENSG00000085998.14	540.67	-0.780989	0.334874	-2.33219	0.0196907	0.130187
ENSG00000085999.13	810.601	0.521364	0.260491	2.00146	0.0453424	0.215253
ENSG00000086015.22	1166.52	0.715591	0.247568	2.89049	0.00384644	0.0458435
ENSG00000086061.16	2554.81	-0.516267	0.260872	-1.97901	0.0478154	0.22227
ENSG00000086062.12	995.052	0.449556	0.25104	1.79077	0.0733298	0.284308
ENSG00000086065.14	696.357	0.105364	0.2615	0.402922	0.687006	0.863502
ENSG00000086102.19	621.698	-0.29005	0.270534	-1.07214	0.283658	0.575537
ENSG00000086159.13	4.83763	-0.685879	1.56131	-0.439296	0.660447	NA
ENSG00000086189.10	615.646	0.745586	0.291728	2.55576	0.0105957	0.0886147
ENSG00000086200.16	631.615	0.383194	0.33056	1.15923	0.246364	0.539525
ENSG00000086232.13	1947.07	-0.0728032	0.245144	-0.296981	0.766481	0.901122
ENSG00000086289.12	204.511	-1.7167	0.368897	-4.65361	3.26e-06	0.000285
ENSG00000086300.16	335.931	-0.0211436	0.307244	-0.0688169	0.945135	0.980745
ENSG00000086475.15	657.74	-0.360179	0.275685	-1.30649	0.191387	0.477963
ENSG00000086504.17	1649.49	0.23143	0.3289	0.703649	0.481652	0.74008
ENSG00000086506.3	16.3218	0.424092	0.940171	0.45108	0.651932	0.844454
ENSG00000086544.3	113.852	-0.34253	0.404936	-0.845887	0.397616	0.680424
ENSG00000086570.12	12.2281	0.144003	1.03754	0.138792	0.889614	NA
ENSG00000086589.12	975.896	0.337699	0.272574	1.23893	0.215373	0.506078
ENSG00000086598.11	2967.51	0.348472	0.235161	1.48185	0.138381	0.400205
ENSG00000086619.14	263.466	0.149356	0.315343	0.473632	0.635762	0.836528
ENSG00000086666.19	910.445	0.357875	0.256309	1.39626	0.162636	0.436336
ENSG00000086712.13	672.394	0.342483	0.304545	1.12457	0.26077	0.553075
ENSG00000086730.17	8.26931	-0.716976	1.24624	-0.575309	0.565082	NA
ENSG00000086758.16	6390.48	-0.267093	0.231835	-1.15208	0.249288	0.541748
ENSG00000086827.9	475.525	0.125229	0.281892	0.444243	0.656867	0.84641
ENSG00000086848.15	319.349	0.427473	0.309184	1.38258	0.166792	0.442428
ENSG00000086967.10	2.97359	-0.305875	1.94939	-0.156908	0.875318	NA
ENSG00000087008.16	82.5856	-1.25653	0.472589	-2.65883	0.00784119	0.0730149
ENSG00000087053.19	1124.12	0.347506	0.267027	1.30139	0.193126	0.480732
ENSG00000087074.8	2468.4	2.51949	0.955603	2.63654	0.00837554	0.0766638
ENSG00000087076.9	36.5642	0.217881	0.626224	0.347928	0.727894	0.885666
ENSG00000087077.14	943.051	0.246133	0.304906	0.807241	0.419528	0.697162
ENSG00000087085.15	56.6394	-0.133522	0.583824	-0.228703	0.8191	0.927426
ENSG00000087086.15	6489.75	0.438469	0.263111	1.66648	0.0956178	0.324767
ENSG00000087087.20	2660.84	0.272534	0.26803	1.0168	0.309247	0.602322
ENSG00000087088.20	779.835	-0.180501	0.327423	-0.551279	0.581443	0.805727
ENSG00000087095.13	162.726	0.124212	0.367021	0.338433	0.735037	0.889057
ENSG00000087111.21	1129.63	0.118315	0.297083	0.398256	0.690442	0.864959
ENSG00000087116.16	247.221	-0.97087	0.386998	-2.50872	0.0121169	0.0961503
ENSG00000087152.15	1292.86	0.0467354	0.253625	0.18427	0.853802	0.94184
ENSG00000087157.19	450.837	0.370472	0.289451	1.27991	0.200575	0.490852
ENSG00000087191.13	2134.03	0.485469	0.293379	1.65475	0.097976	0.32998
ENSG00000087206.17	280.799	-0.061291	0.324792	-0.188709	0.850321	0.940684
ENSG00000087245.13	175.424	-1.57699	0.39285	-4.01424	5.96e-05	0.00241318
ENSG00000087253.13	290.693	-0.234556	0.316741	-0.740527	0.45898	0.725696
ENSG00000087258.15	29.5789	2.59157	0.763129	3.39598	0.000684	0.0137735
ENSG00000087263.17	762.165	0.518468	0.284845	1.82017	0.0687326	0.274255
ENSG00000087266.17	539.895	-0.0713486	0.279839	-0.254963	0.798751	0.917075
ENSG00000087269.16	1859.21	0.538848	0.275767	1.954	0.0507011	0.22978
ENSG00000087274.17	2077.65	0.319897	0.245922	1.30081	0.193324	0.480732
ENSG00000087299.12	340.681	-0.0355882	0.294498	-0.120844	0.903815	0.963748
ENSG00000087301.9	344.708	-0.597157	0.351855	-1.69717	0.0896646	0.314715
ENSG00000087302.9	1348.34	0.306802	0.247514	1.23954	0.215147	0.505922
ENSG00000087303.18	345.715	0.239693	0.313595	0.764339	0.444665	0.715798
ENSG00000087338.5	578.03	-0.178582	0.291749	-0.612109	0.540466	0.779094
ENSG00000087365.16	7259.33	0.689062	0.248371	2.77432	0.00553166	0.0585163
ENSG00000087448.11	750.317	0.607253	0.275591	2.20346	0.0275624	0.159436
ENSG00000087460.25	13180.8	-0.303518	0.267213	-1.13587	0.256012	0.548413
ENSG00000087470.18	1588.6	0.191936	0.244497	0.785023	0.43244	0.706909
ENSG00000087494.16	35.9306	1.21572	0.679128	1.79012	0.0734354	0.284602
ENSG00000087495.17	18.7313	-1.79706	0.877063	-2.04896	0.0404665	0.202013
ENSG00000087502.18	642.741	0.132819	0.268336	0.494973	0.620619	0.828018
ENSG00000087510.7	244.853	0.21897	0.325972	0.671746	0.501746	0.751926
ENSG00000087586.17	1564.09	0.244773	0.243683	1.00447	0.31515	0.608981
ENSG00000087589.16	9.04796	1.46888	1.24189	1.18278	0.236897	NA
ENSG00000087842.11	115.05	-1.24682	0.48365	-2.57794	0.0099391	0.0848917
ENSG00000087884.14	136.826	0.108935	0.408071	0.266952	0.789506	0.912297
ENSG00000087903.13	189.244	0.519115	0.347412	1.49423	0.135114	0.395792
ENSG00000087995.16	523.721	0.809572	0.273652	2.9584	0.00309238	0.0396555
ENSG00000088002.12	8.82384	0.737909	1.19484	0.617579	0.536853	NA
ENSG00000088035.18	246.807	-0.451212	0.342235	-1.31843	0.18736	0.472847
ENSG00000088038.19	2037.6	0.162583	0.262484	0.619401	0.535652	0.776473
ENSG00000088053.11	6.01088	-0.871137	1.42668	-0.610603	0.541463	NA
ENSG00000088179.9	291.069	0.127053	0.351684	0.361269	0.717898	0.879536
ENSG00000088205.13	2414.47	0.356924	0.285783	1.24893	0.211689	0.502232
ENSG00000088247.17	6748.61	0.229461	0.252799	0.907681	0.364047	0.654105
ENSG00000088256.9	1483.1	0.48508	0.272373	1.78094	0.0749219	0.288002
ENSG00000088280.19	206.454	-1.03567	0.354272	-2.92339	0.00346248	0.0428817
ENSG00000088298.13	172.554	0.371449	0.356939	1.04065	0.298038	0.591019
ENSG00000088305.18	578.547	-1.15484	0.331903	-3.47946	0.000502	0.0112112
ENSG00000088325.16	4644.89	0.193026	0.239352	0.806452	0.419982	0.697601
ENSG00000088340.17	46.3749	-0.110185	0.565421	-0.194872	0.845493	0.938094
ENSG00000088356.6	654.676	0.95928	0.319766	2.99994	0.00270028	0.036382
ENSG00000088367.23	483.329	-1.31615	0.32199	-4.08754	4.36e-05	0.00190136
ENSG00000088386.17	21.8351	1.08684	0.838909	1.29554	0.195135	0.483574
ENSG00000088387.19	429.256	0.430173	0.287061	1.49854	0.133993	0.393917
ENSG00000088448.14	301.387	0.402681	0.309233	1.30219	0.192851	0.480577
ENSG00000088451.11	137.916	0.12698	0.380385	0.333819	0.738516	0.890815
ENSG00000088538.13	350.792	-0.0205145	0.303012	-0.0677019	0.946023	0.980745
ENSG00000088543.15	4.26751	-1.62837	1.72336	-0.944881	0.34472	NA
ENSG00000088682.14	400.559	-0.168692	0.293648	-0.574468	0.565651	0.794883
ENSG00000088726.16	22.7138	3.14481	0.929651	3.38279	0.000718	0.014124
ENSG00000088727.12	46.1656	0.711178	0.631306	1.12652	0.259946	0.552356
ENSG00000088756.12	81.0641	-0.982556	0.5244	-1.87368	0.0609748	0.255363
ENSG00000088766.12	674.699	-0.0262933	0.262159	-0.100295	0.92011	0.970521
ENSG00000088808.18	375.925	-0.0590858	0.30024	-0.196795	0.843988	0.937791
ENSG00000088812.18	829.979	-1.12148	0.263176	-4.26131	2.03e-05	0.00109903
ENSG00000088826.18	188.613	0.542651	0.35453	1.53062	0.125863	0.379714
ENSG00000088827.12	10.2093	0.76645	1.14395	0.670003	0.502856	NA
ENSG00000088832.17	3024.72	-0.197901	0.238007	-0.831492	0.405696	0.686215
ENSG00000088833.17	1129.07	0.292172	0.278875	1.04768	0.294786	0.587677
ENSG00000088836.14	110.406	0.0552933	0.435926	0.126841	0.899066	0.962398
ENSG00000088854.12	254.124	0.400689	0.327078	1.22505	0.220555	0.512626
ENSG00000088876.13	300.229	-0.425128	0.310853	-1.36762	0.171432	0.447182
ENSG00000088881.21	171.842	-1.0249	0.377576	-2.71443	0.00663893	0.0657232
ENSG00000088888.18	1589.42	-0.506322	0.264657	-1.91313	0.0557317	0.242179
ENSG00000088899.15	250.717	0.280953	0.330211	0.850829	0.394864	0.678677
ENSG00000088930.8	1383.65	-0.155963	0.247831	-0.629311	0.529146	0.772212
ENSG00000088970.16	192.542	-0.21192	0.342511	-0.618725	0.536097	0.776822
ENSG00000088986.11	1912.05	-0.0536155	0.265961	-0.201592	0.840236	0.936293
ENSG00000088992.18	104.181	0.557591	0.406923	1.37026	0.170606	0.445834
ENSG00000089006.16	1481.51	0.278088	0.249682	1.11377	0.265378	0.557724
ENSG00000089009.15	18146.1	0.227456	0.247551	0.918826	0.358187	0.648981
ENSG00000089022.14	804.156	0.169743	0.256944	0.660622	0.508855	0.757102
ENSG00000089048.14	506.151	-0.070819	0.274281	-0.258198	0.796254	0.915418
ENSG00000089050.16	282.235	-0.862438	0.325735	-2.64767	0.00810494	0.0748254
ENSG00000089053.13	2490.11	0.0965866	0.241685	0.399638	0.689423	0.864324
ENSG00000089057.15	1415.93	0.27669	0.247419	1.1183	0.263437	0.55563
ENSG00000089060.11	221.794	-0.360097	0.39692	-0.907229	0.364285	0.654105
ENSG00000089063.15	1316.99	-0.219102	0.251228	-0.872122	0.383142	0.66899
ENSG00000089091.16	35.5001	0.33374	0.646808	0.51598	0.605869	0.819195
ENSG00000089094.19	827.553	-0.173571	0.268922	-0.645432	0.518647	0.764143
ENSG00000089116.4	5.07361	1.09657	1.53772	0.713116	0.475774	NA
ENSG00000089123.16	114.672	0.37296	0.406011	0.918597	0.358306	0.649043
ENSG00000089154.11	3887.28	0.285765	0.250695	1.13989	0.254332	0.547268
ENSG00000089157.16	18342.6	0.166692	0.232715	0.716292	0.473811	0.735523
ENSG00000089159.16	1349.27	0.0806768	0.24813	0.32514	0.745075	0.894326
ENSG00000089163.4	26.2254	0.850518	0.71859	1.18359	0.236574	0.528062
ENSG00000089177.18	215.653	-0.163676	0.336423	-0.486519	0.626599	0.831308
ENSG00000089195.15	557.248	0.439606	0.315252	1.39446	0.163179	0.437349
ENSG00000089199.10	17.3102	3.49131	1.09718	3.18207	0.00146226	0.0236464
ENSG00000089220.5	3376.57	-0.0953304	0.277745	-0.34323	0.731426	0.887263
ENSG00000089225.20	24.3007	-0.47333	0.78005	-0.606794	0.543987	0.7814
ENSG00000089234.16	463.937	0.180182	0.289987	0.621343	0.534374	0.775879
ENSG00000089248.7	1185.4	0.527874	0.292276	1.80608	0.0709052	0.27916
ENSG00000089250.19	12.4857	0.269189	1.02143	0.26354	0.792134	NA
ENSG00000089280.19	8729.44	0.253524	0.262124	0.967191	0.333448	0.626259
ENSG00000089289.16	615.981	0.431299	0.287925	1.49796	0.134144	0.394209
ENSG00000089327.15	431.447	0.15609	0.283403	0.550769	0.581792	0.805819
ENSG00000089335.21	343.47	-0.682433	0.330075	-2.06751	0.0386865	0.197583
ENSG00000089351.14	470.407	-1.37636	0.351102	-3.92011	8.85e-05	0.00324871
ENSG00000089486.17	1609.78	0.651188	0.26744	2.43489	0.0148964	0.108361
ENSG00000089505.17	8.1816	0.225494	1.28797	0.175077	0.861019	NA
ENSG00000089558.9	5.29753	-0.579796	1.51519	-0.382657	0.701974	NA
ENSG00000089597.18	9845.01	0.622838	0.228504	2.72573	0.00641601	0.064426
ENSG00000089639.11	122.329	-0.593091	0.412972	-1.43615	0.150959	0.418599
ENSG00000089682.16	229.421	-1.06728	0.324697	-3.28699	0.00101266	0.0180614
ENSG00000089685.15	3750.74	0.765555	0.25996	2.94489	0.00323066	0.0410135
ENSG00000089692.9	12.515	-1.72822	1.03847	-1.6642	0.0960719	NA
ENSG00000089693.10	3193.5	0.272793	0.276473	0.986688	0.323795	0.618062
ENSG00000089723.10	103.934	-0.594232	0.442168	-1.34391	0.178979	0.460131
ENSG00000089737.17	2919.67	0.0267596	0.240336	0.111342	0.911345	0.966892
ENSG00000089775.11	119.239	-0.803386	0.41983	-1.9136	0.0556717	0.241987
ENSG00000089818.18	476.589	0.169652	0.276688	0.613152	0.539776	0.77881
ENSG00000089820.16	20.0403	0.100878	0.82514	0.122256	0.902697	0.963317
ENSG00000089847.12	5.97767	-2.24427	1.56031	-1.43835	0.150335	NA
ENSG00000089876.12	499.054	-0.153314	0.292563	-0.524037	0.600253	0.815099
ENSG00000089902.10	693.025	-0.246519	0.304742	-0.808943	0.418548	0.696175
ENSG00000089916.18	506.467	-0.37509	0.342469	-1.09525	0.273406	0.565802
ENSG00000090006.18	356.778	-0.5962	0.381458	-1.56295	0.118065	0.36651
ENSG00000090013.11	168.175	-0.124241	0.36413	-0.341201	0.732952	0.888214
ENSG00000090020.11	648.353	0.328822	0.273092	1.20407	0.228563	0.52018
ENSG00000090054.15	1729.73	0.626837	0.263328	2.38044	0.0172921	0.119441
ENSG00000090060.18	2877.11	-0.297873	0.245846	-1.21163	0.225656	0.517126
ENSG00000090061.17	979.851	0.146001	0.266463	0.547923	0.583745	0.806857
ENSG00000090097.21	196.151	-0.0737425	0.346336	-0.212922	0.831388	0.93224
ENSG00000090238.12	176.578	1.03222	0.358711	2.87757	0.00400757	0.0473922
ENSG00000090263.16	202.361	0.100557	0.337497	0.29795	0.765741	0.901053
ENSG00000090266.13	567.516	0.381044	0.281568	1.35329	0.175962	0.455368
ENSG00000090273.14	2691.39	-0.123889	0.302996	-0.40888	0.682628	0.860776
ENSG00000090316.16	1179.35	0.184289	0.262766	0.701342	0.483089	0.741443
ENSG00000090339.9	91.7648	1.78955	0.440367	4.06378	4.83e-05	0.00206106
ENSG00000090372.15	1751.13	-0.453815	0.274643	-1.65238	0.0984566	0.330494
ENSG00000090376.11	6.67047	2.26146	1.41671	1.59627	0.110428	NA
ENSG00000090432.7	511.824	0.318022	0.282726	1.12484	0.260656	0.553075
ENSG00000090447.12	352.025	-0.110372	0.301191	-0.366452	0.714028	0.877577
ENSG00000090470.15	354.1	0.104231	0.306859	0.33967	0.734105	0.888456
ENSG00000090487.11	692.684	0.332118	0.272455	1.21899	0.22285	0.514797
ENSG00000090520.11	1225.48	1.04391	0.271042	3.85148	0.000117	0.00393758
ENSG00000090530.10	294.795	1.87094	0.314257	5.95351	2.62e-09	7.25e-07
ENSG00000090534.20	6.96702	-3.63276	1.6559	-2.19383	0.0282479	NA
ENSG00000090539.15	84.5068	0.354715	0.444791	0.797487	0.425168	0.701428
ENSG00000090554.13	24.5778	-1.69822	0.771273	-2.20183	0.027677	0.159795
ENSG00000090565.17	682.775	-0.656337	0.289659	-2.26589	0.0234579	0.1452
ENSG00000090581.10	389.514	-0.105542	0.305878	-0.345046	0.73006	0.886626
ENSG00000090612.22	510.095	0.83027	0.317487	2.61513	0.00891925	0.0796807
ENSG00000090615.15	1421.94	0.467269	0.278888	1.67547	0.0938419	0.321538
ENSG00000090621.14	3851.05	0.269929	0.240317	1.12322	0.261344	0.553503
ENSG00000090661.12	227.536	0.212814	0.35024	0.607624	0.543437	0.7814
ENSG00000090674.16	281.689	1.19457	0.344041	3.47218	0.000516	0.0114247
ENSG00000090686.16	1312.43	0.150705	0.250188	0.602366	0.54693	0.783628
ENSG00000090776.6	448.555	0.305428	0.293594	1.04031	0.298196	0.591082
ENSG00000090857.14	875.75	-0.246107	0.261946	-0.939533	0.347457	0.639143
ENSG00000090861.16	3937.31	1.0374	0.253672	4.08953	4.32e-05	0.00189293
ENSG00000090863.12	1334.59	-0.25836	0.245778	-1.05119	0.29317	0.585816
ENSG00000090889.12	1716.71	0.800257	0.243431	3.28741	0.00101112	0.0180552
ENSG00000090905.19	987.227	0.0298731	0.279559	0.106858	0.914902	0.968353
ENSG00000090924.15	417.536	-1.53271	0.316891	-4.83673	1.32e-06	0.000137
ENSG00000090932.11	91.8548	0.461575	0.429619	1.07438	0.282651	0.575296
ENSG00000090971.5	430.891	0.834416	0.360484	2.31471	0.020629	0.134022
ENSG00000090975.12	230.41	0.45191	0.344887	1.31031	0.19009	0.47624
ENSG00000090989.18	440.171	0.15046	0.296036	0.508247	0.61128	0.821527
ENSG00000091009.8	736.9	0.122147	0.298324	0.409445	0.682213	0.860459
ENSG00000091010.6	3.0287	0.170769	1.9502	0.0875647	0.930223	NA
ENSG00000091039.17	1004	-0.0901901	0.290838	-0.310104	0.756481	0.898194
ENSG00000091073.19	142.287	0.247832	0.367466	0.674436	0.500034	0.750662
ENSG00000091106.19	37.2906	3.0733	0.681239	4.51134	6.44e-06	0.000485
ENSG00000091127.14	407.858	-0.363026	0.285414	-1.27193	0.203399	0.493454
ENSG00000091129.21	274.36	0.214971	0.340062	0.632152	0.527287	0.771007
ENSG00000091136.14	1079.52	-0.301094	0.273736	-1.09994	0.271357	0.563905
ENSG00000091137.14	4.57742	1.30685	2.08503	0.626776	0.530806	NA
ENSG00000091140.14	1143.75	-0.403204	0.259743	-1.55232	0.120586	0.371312
ENSG00000091157.13	257.734	-0.609742	0.338958	-1.79887	0.0720393	0.281996
ENSG00000091164.13	715.065	0.531315	0.274323	1.93683	0.0527667	0.234869
ENSG00000091262.15	90.4853	-0.563061	0.490051	-1.14899	0.250562	0.543245
ENSG00000091317.8	1048.42	-0.270313	0.260732	-1.03675	0.299853	0.592592
ENSG00000091409.15	716.51	1.18227	0.278222	4.24937	2.14e-05	0.00113433
ENSG00000091428.18	115.282	-0.0267627	0.39665	-0.0674718	0.946206	0.980801
ENSG00000091436.17	651.113	0.255574	0.281587	0.907621	0.364079	0.654105
ENSG00000091483.7	461.539	-0.0468421	0.280288	-0.167122	0.867274	0.949024
ENSG00000091490.11	375.634	-0.188278	0.293713	-0.641027	0.521505	0.766981
ENSG00000091513.16	14.3138	0.601385	0.987957	0.608716	0.542713	0.780676
ENSG00000091527.15	2741.13	0.324063	0.271487	1.19366	0.232612	0.524525
ENSG00000091536.19	6.32387	0.0135847	1.40757	0.00965119	0.9923	NA
ENSG00000091542.9	1130.15	0.0778353	0.250832	0.310309	0.756326	0.898181
ENSG00000091583.11	8.33588	0.667852	4.59026	0.145493	0.884322	NA
ENSG00000091592.16	7.85125	-2.68396	1.37379	-1.95369	0.0507377	NA
ENSG00000091622.16	48.4573	-0.34893	0.547885	-0.636868	0.524211	0.76891
ENSG00000091640.8	384.507	1.30795	0.297173	4.4013	1.08e-05	0.000702
ENSG00000091651.9	876.15	0.646706	0.276113	2.34218	0.0191715	0.127832
ENSG00000091656.19	353.691	-1.19806	0.330627	-3.6236	0.000291	0.00774542
ENSG00000091732.17	353.641	0.0740157	0.293441	0.252234	0.80086	0.918489
ENSG00000091831.23	6.74345	-0.613271	1.3758	-0.445755	0.655774	NA
ENSG00000091844.8	21.0036	1.07182	0.925028	1.15869	0.246581	0.539584
ENSG00000091879.14	28.437	5.23773	2.41167	2.17183	0.0298685	0.168468
ENSG00000091947.10	492.593	0.547853	0.328505	1.66771	0.0953726	0.324369
ENSG00000091986.15	104.334	-1.75286	0.442055	-3.96526	7.33e-05	0.00281378
ENSG00000092010.15	532.075	-0.233862	0.340496	-0.686827	0.492192	0.746402
ENSG00000092020.10	202.252	-0.269674	0.335413	-0.804005	0.421394	0.698538
ENSG00000092036.18	263.089	-0.177392	0.383316	-0.462784	0.643519	0.840113
ENSG00000092051.17	5.50773	-0.73479	1.54348	-0.476061	0.634031	NA
ENSG00000092068.20	362.138	-0.804617	0.32886	-2.44669	0.0144176	0.106406
ENSG00000092094.11	480.553	0.947651	0.277953	3.40939	0.000651	0.0133702
ENSG00000092096.17	90.5705	0.572592	0.514977	1.11188	0.26619	0.558473
ENSG00000092098.17	373.344	0.125836	0.301925	0.416778	0.676841	0.856821
ENSG00000092108.21	529.516	0.454051	0.296349	1.53215	0.125486	0.379371
ENSG00000092140.16	572.811	0.826232	0.321421	2.57056	0.0101535	0.0861485
ENSG00000092148.13	1363.92	-0.484847	0.289976	-1.67202	0.0945196	0.322432
ENSG00000092199.17	6987.87	-0.891876	0.251472	-3.54662	0.00039	0.00938234
ENSG00000092201.10	4342.94	0.466256	0.234849	1.98535	0.047106	0.220729
ENSG00000092203.15	985.891	0.464599	0.272906	1.70242	0.0886774	0.312945
ENSG00000092208.17	247.637	-0.28944	0.321477	-0.900345	0.367937	0.657166
ENSG00000092295.12	15.887	-0.893397	0.906276	-0.985789	0.324237	0.618314
ENSG00000092330.18	224.313	0.165984	0.33225	0.499575	0.617374	0.825919
ENSG00000092421.16	301.749	-0.0936462	0.437046	-0.214271	0.830336	0.932075
ENSG00000092439.16	539.151	-0.442537	0.28554	-1.54983	0.121183	0.372108
ENSG00000092445.12	366.846	-0.834922	0.333314	-2.50491	0.0122483	0.0967917
ENSG00000092470.12	460.95	0.711618	0.293361	2.42575	0.015277	0.110128
ENSG00000092529.25	13.4406	-0.276231	0.962973	-0.286853	0.774225	0.905637
ENSG00000092531.10	553.037	0.494221	0.280232	1.76361	0.0777972	0.292553
ENSG00000092607.15	9.53732	3.20896	1.35051	2.37611	0.0174965	NA
ENSG00000092621.12	4529.85	0.632651	0.287164	2.2031	0.0275875	0.15946
ENSG00000092758.18	315.634	-1.71613	0.409237	-4.19348	2.75e-05	0.00135533
ENSG00000092820.18	3312.58	0.638548	0.271663	2.35052	0.0187473	0.126169
ENSG00000092841.19	5794.89	0.753255	0.278328	2.70635	0.00680267	0.0666495
ENSG00000092847.13	1217.25	0.23304	0.266111	0.875724	0.38118	0.667617
ENSG00000092850.12	3.58752	-2.57785	2.17372	-1.18592	0.235655	NA
ENSG00000092853.14	1176.96	0.0706273	0.253101	0.279048	0.780208	0.908481
ENSG00000092871.17	259.183	-0.124091	0.315779	-0.392968	0.694343	0.867112
ENSG00000092929.11	9.25043	-0.243081	1.18161	-0.20572	0.83701	NA
ENSG00000092931.11	1462.43	-0.406073	0.275226	-1.47541	0.140101	0.403063
ENSG00000092964.18	264.075	-0.523052	0.378727	-1.38108	0.167254	0.442723
ENSG00000092969.12	42.5313	-0.743481	0.728729	-1.02024	0.307613	0.600217
ENSG00000092978.11	241.506	0.345965	0.329	1.05157	0.292999	0.58569
ENSG00000093000.19	1601.83	-0.0942489	0.25017	-0.376739	0.706367	0.874243
ENSG00000093009.11	1090.35	0.171177	0.281642	0.607783	0.543332	0.781345
ENSG00000093010.14	670.868	0.700137	0.297981	2.3496	0.0187936	0.126255
ENSG00000093100.13	240.075	0.0140321	0.32086	0.0437327	0.965117	0.987952
ENSG00000093144.19	654.586	0.178135	0.265996	0.66969	0.503055	0.752644
ENSG00000093167.18	507.916	0.554793	0.274145	2.02372	0.0429986	0.209431
ENSG00000093183.14	610.886	0.0775033	0.266762	0.290534	0.771408	0.903941
ENSG00000093217.11	133.593	-1.48554	0.383477	-3.87388	0.000107	0.00368273
ENSG00000094631.21	578.788	-0.200367	0.34767	-0.576313	0.564404	0.79399
ENSG00000094804.12	2462.8	0.74352	0.244332	3.04308	0.00234174	0.0331641
ENSG00000094841.14	124.954	-0.889847	0.393759	-2.25988	0.0238289	0.14651
ENSG00000094880.11	1286	0.851778	0.259603	3.28107	0.00103413	0.0183135
ENSG00000094914.14	696.312	-0.35759	0.317925	-1.12476	0.26069	0.553075
ENSG00000094916.16	3481.3	0.531754	0.300061	1.77215	0.0763692	0.290375
ENSG00000094975.14	623.008	-0.0491459	0.296108	-0.165973	0.868178	0.94933
ENSG00000095002.15	1856.78	0.163849	0.252166	0.649768	0.515842	0.761847
ENSG00000095015.6	314.197	-0.117366	0.321856	-0.364653	0.715371	0.878374
ENSG00000095059.16	376.893	0.109783	0.338778	0.324055	0.745896	0.894587
ENSG00000095066.11	263.006	-0.282248	0.314336	-0.897917	0.36923	0.658293
ENSG00000095139.14	2811.65	0.248278	0.242845	1.02237	0.306604	0.599403
ENSG00000095203.14	256.275	-0.427863	0.317709	-1.34672	0.178072	0.458604
ENSG00000095209.12	726.936	0.199125	0.274595	0.72516	0.468354	0.733049
ENSG00000095303.17	11.7236	-1.44518	1.08737	-1.32906	0.183827	NA
ENSG00000095319.14	2435.64	0.544958	0.238942	2.28071	0.0225657	0.141406
ENSG00000095321.17	165.302	-1.01539	0.497398	-2.0414	0.0412108	0.204453
ENSG00000095380.11	483.785	0.506798	0.306499	1.65351	0.0982279	0.330335
ENSG00000095383.20	39.5247	0.939608	0.610926	1.53801	0.124047	0.377347
ENSG00000095397.16	363.673	0.275061	0.304203	0.904202	0.365888	0.655433
ENSG00000095485.18	833.401	-0.0652376	0.25596	-0.254875	0.79882	0.917075
ENSG00000095539.15	264.412	-0.637968	0.351398	-1.81552	0.0694445	0.276179
ENSG00000095564.14	2010.57	-0.0532548	0.326518	-0.163099	0.87044	0.949655
ENSG00000095574.12	433.842	0.164297	0.311846	0.526854	0.598295	0.814085
ENSG00000095587.9	47.0312	-1.19962	0.572648	-2.09487	0.0361824	0.190055
ENSG00000095596.12	31.4591	-0.136137	0.65721	-0.207144	0.835897	0.934748
ENSG00000095637.22	118.431	-0.682626	0.392228	-1.74038	0.0817921	0.300902
ENSG00000095713.14	28.0556	1.46027	0.943341	1.54798	0.121627	0.373006
ENSG00000095739.11	469.678	-0.231699	0.305505	-0.758415	0.448203	0.718296
ENSG00000095752.7	16.6671	0.0848326	0.94649	0.0896287	0.928582	0.97396
ENSG00000095777.17	114.845	0.397485	0.398907	0.996437	0.319038	0.613606
ENSG00000095787.23	2089.37	0.369371	0.256393	1.44064	0.149686	0.416399
ENSG00000095794.19	305.079	0.553594	0.332014	1.66738	0.0954386	0.324452
ENSG00000095906.17	1277.9	-0.124079	0.298557	-0.415597	0.677705	0.857395
ENSG00000095951.17	337.381	-0.199728	0.326463	-0.611792	0.540675	0.779133
ENSG00000096060.14	1306.22	0.146125	0.247716	0.58989	0.555265	0.78902
ENSG00000096063.16	2261.16	0.120565	0.253034	0.47648	0.633732	0.835493
ENSG00000096070.19	903.614	-0.270445	0.264196	-1.02365	0.305999	0.598797
ENSG00000096080.11	584.125	0.226669	0.301662	0.751399	0.452413	0.720983
ENSG00000096092.6	232.766	-0.212297	0.347875	-0.610268	0.541685	0.779832
ENSG00000096093.16	294.525	-0.249378	0.338202	-0.737365	0.460901	0.727183
ENSG00000096384.20	23623.9	0.266989	0.235277	1.13478	0.256466	0.548755
ENSG00000096401.8	1760.16	0.293977	0.244233	1.20368	0.228715	0.520261
ENSG00000096433.11	1269.09	-0.021219	0.259806	-0.0816726	0.934907	0.976743
ENSG00000096654.15	176.784	-0.0540057	0.394481	-0.136903	0.891107	0.958747
ENSG00000096696.14	5753.64	0.561063	0.248849	2.25463	0.0241564	0.147528
ENSG00000096717.12	670.608	-0.162032	0.277753	-0.583369	0.559645	0.79186
ENSG00000096746.17	3430.72	-0.197704	0.263728	-0.749649	0.453466	0.721708
ENSG00000096872.16	161.783	0.467792	0.355038	1.31758	0.187643	0.473127
ENSG00000096968.14	89.4826	-0.689611	0.465137	-1.4826	0.138181	0.399956
ENSG00000097007.19	1924.98	0.302771	0.239175	1.2659	0.20555	0.496078
ENSG00000097021.19	1384.12	0.11414	0.260039	0.438933	0.66071	0.848372
ENSG00000097033.14	1191.89	0.223706	0.264195	0.846746	0.397137	0.680064
ENSG00000097046.13	719.245	-0.964215	0.277708	-3.47205	0.000517	0.0114247
ENSG00000097096.9	253.092	0.0902919	0.324065	0.278623	0.780534	0.908571
ENSG00000099139.14	189.652	-0.268779	0.342877	-0.783893	0.433103	0.707377
ENSG00000099194.6	8760.08	-1.45456	0.263095	-5.52863	3.23e-08	6.05e-06
ENSG00000099203.7	410.964	1.03383	0.317007	3.26121	0.00110938	0.0192664
ENSG00000099204.20	1547.51	0.43496	0.254928	1.70621	0.0879691	0.311436
ENSG00000099219.14	892.731	0.951127	0.264204	3.59998	0.000318	0.0081828
ENSG00000099246.17	463.94	0.179584	0.298684	0.601249	0.547674	0.784278
ENSG00000099250.18	309.816	-0.235813	0.330589	-0.713313	0.475652	0.736414
ENSG00000099251.14	25.8725	1.29117	0.752026	1.71693	0.0859922	0.308338
ENSG00000099256.19	42.9556	-0.447333	0.581802	-0.768874	0.441968	0.713497
ENSG00000099260.11	21.0149	-1.23052	0.815518	-1.50888	0.131329	0.388873
ENSG00000099282.10	185.451	-0.19743	0.39348	-0.501754	0.61584	0.824807
ENSG00000099284.14	1091.65	-0.0336787	0.28536	-0.118022	0.90605	0.964751
ENSG00000099290.17	961.816	-0.129032	0.260939	-0.494492	0.620958	0.828235
ENSG00000099308.10	134.195	0.414958	0.387528	1.07078	0.284267	0.575944
ENSG00000099326.9	289.767	-1.0008	0.328101	-3.05028	0.00228625	0.0328073
ENSG00000099330.9	54.5076	-0.773028	0.560817	-1.3784	0.168081	0.443165
ENSG00000099331.13	998.89	-0.0473162	0.274327	-0.172481	0.86306	0.946525
ENSG00000099337.5	28.695	0.578234	0.733687	0.788121	0.430626	0.705471
ENSG00000099338.23	5.85807	-0.571149	1.432	-0.398847	0.690006	NA
ENSG00000099341.11	2024.69	0.196459	0.264066	0.743978	0.45689	0.724124
ENSG00000099364.16	1102.93	-0.0724097	0.295459	-0.245075	0.806398	0.921356
ENSG00000099365.11	13.5279	-0.0353004	1.01068	-0.0349274	0.972138	0.990519
ENSG00000099377.14	38.4328	0.95071	0.611523	1.55466	0.120027	0.370342
ENSG00000099381.18	1254.87	0.117711	0.257677	0.456814	0.647804	0.842739
ENSG00000099385.11	493.399	-0.0442163	0.326457	-0.135443	0.892262	0.95944
ENSG00000099399.6	14.5438	3.84137	1.3503	2.84483	0.0044435	0.0505037
ENSG00000099617.4	19.9777	-0.385285	0.839086	-0.459173	0.64611	0.84141
ENSG00000099622.14	1135.74	0.369843	0.256465	1.44208	0.14928	0.415873
ENSG00000099624.8	945.135	0.56352	0.279685	2.01484	0.0439214	0.211772
ENSG00000099625.13	117.292	0.405424	0.433906	0.934359	0.350119	0.641294
ENSG00000099769.6	9.86244	0.504264	1.13316	0.445005	0.656316	NA
ENSG00000099783.12	6111.53	-0.386981	0.263706	-1.46747	0.142248	0.406391
ENSG00000099785.10	94.016	-0.155701	0.512993	-0.303516	0.761497	0.899964
ENSG00000099795.7	724.763	-0.0171935	0.3607	-0.047667	0.961982	0.986587
ENSG00000099797.15	1283.7	0.245636	0.293954	0.835629	0.403364	0.68425
ENSG00000099800.8	905.874	0.0493007	0.333456	0.147847	0.882463	0.956143
ENSG00000099804.9	1026.21	0.898992	0.309356	2.90601	0.00366067	0.0444309
ENSG00000099810.21	469.431	0.446732	0.314448	1.42069	0.155407	0.426045
ENSG00000099812.9	4.64404	1.14315	1.66372	0.687108	0.492014	NA
ENSG00000099814.16	1007.48	-0.0567335	0.275617	-0.205842	0.836915	0.935082
ENSG00000099817.12	2267.95	0.0563851	0.30328	0.185918	0.852509	0.941614
ENSG00000099821.14	1145.03	0.425412	0.284886	1.49327	0.135367	0.395972
ENSG00000099822.3	658.677	1.6561	0.271	6.11106	9.9e-10	3.13e-07
ENSG00000099834.19	3.08725	-0.019538	2.17915	-0.00896589	0.992846	NA
ENSG00000099840.14	20.3624	-0.598118	0.847766	-0.705523	0.480485	0.73955
ENSG00000099849.15	368.231	0.233698	0.425571	0.54914	0.582909	0.806533
ENSG00000099860.9	968.781	1.7712	1.05821	1.67377	0.0941761	0.321857
ENSG00000099864.18	325.727	-0.295607	0.328726	-0.899251	0.368519	0.65751
ENSG00000099866.15	10.6139	0.40356	1.08079	0.373393	0.708856	NA
ENSG00000099875.14	1430.04	0.697505	0.255851	2.72621	0.00640656	0.0643876
ENSG00000099889.14	254.399	0.582687	0.321429	1.8128	0.0698621	0.277331
ENSG00000099899.15	1094.4	0.180602	0.285782	0.631958	0.527414	0.771007
ENSG00000099901.17	3654.06	0.098418	0.249132	0.395044	0.69281	0.866472
ENSG00000099904.15	671.56	-0.251314	0.309567	-0.811823	0.416893	0.694868
ENSG00000099910.17	339.157	-0.706711	0.33485	-2.11053	0.0348128	0.186011
ENSG00000099917.17	1255.58	0.403889	0.256731	1.5732	0.115672	0.362499
ENSG00000099940.12	732.725	0.549418	0.270944	2.02779	0.0425819	0.208397
ENSG00000099942.13	2380.43	0.202244	0.268856	0.752237	0.451908	0.720983
ENSG00000099949.21	898.148	-0.052505	0.269059	-0.195143	0.845281	0.938094
ENSG00000099953.10	100.274	-0.951748	0.475986	-1.99953	0.0455511	0.215973
ENSG00000099954.18	538.123	0.214199	0.275258	0.778176	0.436465	0.709437
ENSG00000099956.20	2421.61	0.129277	0.264088	0.489523	0.624472	0.829977
ENSG00000099958.15	322.278	0.305092	0.367178	0.83091	0.406024	0.686541
ENSG00000099968.18	961.608	0.522844	0.255076	2.04975	0.0403884	0.201756
ENSG00000099974.8	89.3246	-0.00201601	0.429077	-0.00469849	0.996251	0.998946
ENSG00000099977.14	925.3	-0.453388	0.315017	-1.43925	0.150079	0.417231
ENSG00000099991.18	1285.53	0.149797	0.25905	0.578256	0.563091	0.793501
ENSG00000099992.16	233.639	0.248323	0.368061	0.674678	0.49988	0.750662
ENSG00000099994.11	8.33855	-1.36825	1.31216	-1.04274	0.297068	NA
ENSG00000099995.19	3209.53	-0.0167533	0.242205	-0.06917	0.944854	0.980737
ENSG00000099999.15	222.965	-1.04638	0.346788	-3.01733	0.00255011	0.0349427
ENSG00000100003.18	71.4936	-0.353975	0.469523	-0.753903	0.450908	0.720126
ENSG00000100014.20	1089.29	-0.402513	0.257469	-1.56335	0.117971	0.366377
ENSG00000100023.19	802.997	0.118442	0.277707	0.426501	0.669743	0.85262
ENSG00000100027.16	145.724	0.342331	0.394188	0.868446	0.38515	0.670649
ENSG00000100028.12	2054.27	0.395846	0.248886	1.59047	0.111728	0.355133
ENSG00000100029.18	2369.34	0.327386	0.310685	1.05376	0.291995	0.584605
ENSG00000100030.15	2384.01	0.379511	0.256275	1.48087	0.13864	0.40068
ENSG00000100031.19	71.8409	-1.03953	0.471598	-2.20428	0.0275049	0.159224
ENSG00000100033.16	36.7635	-0.307268	0.663071	-0.463401	0.643077	0.839995
ENSG00000100034.14	932.674	-0.305769	0.307625	-0.993965	0.32024	0.6149
ENSG00000100036.13	122.243	-0.620494	0.418207	-1.4837	0.137888	0.399418
ENSG00000100038.19	584.599	-0.758365	0.2934	-2.58475	0.00974493	0.0840254
ENSG00000100056.12	421.549	-0.0357727	0.34726	-0.103014	0.917952	0.969722
ENSG00000100058.12	200.732	-0.330736	0.334027	-0.990145	0.322103	0.617333
ENSG00000100060.18	4.98449	0.780878	1.53672	0.508145	0.611352	NA
ENSG00000100065.15	456.822	0.753838	0.345579	2.18138	0.0291555	0.165563
ENSG00000100068.13	69.8081	-0.306774	0.473345	-0.6481	0.516921	0.762695
ENSG00000100075.10	1371.48	-0.249851	0.309152	-0.808181	0.418986	0.696675
ENSG00000100077.15	272.959	-0.881186	0.33597	-2.62281	0.00872081	0.0787814
ENSG00000100083.19	838.24	-0.0875221	0.274852	-0.318433	0.750156	0.895896
ENSG00000100084.14	1222.54	0.318856	0.249385	1.27857	0.201048	0.491335
ENSG00000100092.23	295.186	-0.471284	0.318863	-1.47802	0.139403	0.401699
ENSG00000100097.12	123.463	0.539747	0.495745	1.08876	0.27626	0.568378
ENSG00000100099.20	563.05	-0.435914	0.271545	-1.60531	0.108426	0.348633
ENSG00000100100.13	47.9091	-0.464143	0.581365	-0.798367	0.424658	0.70124
ENSG00000100104.13	403.906	-0.112718	0.290584	-0.387901	0.698089	0.869593
ENSG00000100105.18	888.594	-0.245157	0.263804	-0.929316	0.352726	0.643934
ENSG00000100106.22	411.64	-0.53305	0.320042	-1.66556	0.0958003	0.32496
ENSG00000100109.17	842.43	0.553198	0.273761	2.02074	0.0433071	0.210321
ENSG00000100116.16	309.322	-0.0906447	0.330575	-0.274203	0.783929	0.909843
ENSG00000100124.15	578.816	0.374038	0.276695	1.3518	0.176438	0.455978
ENSG00000100129.18	3236.55	-0.625824	0.260712	-2.40044	0.0163753	0.115613
ENSG00000100138.15	1606.41	0.50885	0.258986	1.96478	0.04944	0.226224
ENSG00000100139.13	1166.07	-0.581441	0.275306	-2.11198	0.0346883	0.185738
ENSG00000100142.16	910.325	0.606585	0.351574	1.72534	0.0844664	0.305405
ENSG00000100147.13	66.3122	-0.656833	0.49407	-1.32943	0.183705	0.466911
ENSG00000100150.20	235.982	-0.0758067	0.319849	-0.237008	0.812651	0.923642
ENSG00000100151.16	391.444	0.249037	0.337567	0.737743	0.460671	0.727083
ENSG00000100154.14	710.942	-0.235265	0.265582	-0.885849	0.375699	0.663234
ENSG00000100156.10	16.5413	-0.263707	0.956567	-0.275681	0.782793	0.909359
ENSG00000100162.15	472	0.217685	0.312942	0.695608	0.486675	0.743491
ENSG00000100167.20	217.558	0.054949	0.338769	0.162202	0.871147	0.949978
ENSG00000100181.22	232.034	-0.886955	0.342627	-2.58869	0.00963419	0.0834521
ENSG00000100196.11	159.692	0.298069	0.363537	0.819914	0.412265	0.6914
ENSG00000100197.22	15.066	-0.451799	0.926998	-0.487379	0.62599	0.830957
ENSG00000100201.22	6810.31	-0.582913	0.260559	-2.23716	0.0252759	0.151336
ENSG00000100206.10	9.81616	0.995387	1.14405	0.870054	0.384271	NA
ENSG00000100207.18	989.438	-0.207317	0.260701	-0.795231	0.426479	0.702558
ENSG00000100209.11	219.687	0.79648	0.338979	2.34964	0.0187915	0.126255
ENSG00000100211.10	196.275	-0.18213	0.366948	-0.496336	0.619657	0.827735
ENSG00000100216.6	726.057	-0.309772	0.31247	-0.991365	0.321508	0.616657
ENSG00000100218.12	3.28149	-1.70136	2.07213	-0.821067	0.411608	NA
ENSG00000100219.16	1736.62	1.10788	0.258314	4.28889	1.8e-05	0.00100689
ENSG00000100220.12	1659.91	0.329691	0.271587	1.21394	0.22477	0.516498
ENSG00000100221.10	864.677	-0.211498	0.25584	-0.826678	0.408419	0.688748
ENSG00000100225.18	1586.55	0.500249	0.248917	2.0097	0.0444628	0.212793
ENSG00000100226.16	1491.73	0.633667	0.246601	2.56961	0.0101814	0.0861934
ENSG00000100227.18	1873.6	0.345816	0.252033	1.37211	0.17003	0.445324
ENSG00000100228.12	203.522	-0.44287	0.358294	-1.23605	0.21644	0.507556
ENSG00000100234.11	346.857	-0.657582	0.297492	-2.21042	0.0270761	0.157462
ENSG00000100239.16	1241.18	0.195539	0.296388	0.65974	0.509421	0.757312
ENSG00000100241.21	3147.84	-0.17415	0.267244	-0.651651	0.514626	0.76106
ENSG00000100242.15	1687.67	1.27511	0.248549	5.13023	2.89e-07	3.86e-05
ENSG00000100243.21	3732.95	0.471406	0.263178	1.79121	0.0732597	0.284211
ENSG00000100246.13	112.674	0.352441	0.438346	0.804026	0.421382	0.698538
ENSG00000100258.18	1478.23	0.572697	0.296409	1.93212	0.0533452	0.236163
ENSG00000100263.14	728.99	0.255558	0.284157	0.899357	0.368462	0.657496
ENSG00000100266.19	985.35	0.310293	0.267044	1.16195	0.245254	0.538128
ENSG00000100271.17	38.6245	-0.272586	0.637683	-0.427463	0.669042	0.852442
ENSG00000100276.10	26.1579	0.083991	0.708629	0.118526	0.905651	0.964656
ENSG00000100280.16	2937.9	0.29096	0.260619	1.11642	0.264242	0.556461
ENSG00000100281.14	803.332	-0.00613361	0.270603	-0.0226664	0.981916	0.993968
ENSG00000100284.21	394.978	0.984201	0.343703	2.86353	0.00418954	0.0485246
ENSG00000100285.10	9.15046	0.17007	1.24236	0.136892	0.891116	NA
ENSG00000100288.20	297.393	-0.963195	0.36799	-2.61745	0.00885903	0.0794229
ENSG00000100290.3	27.3907	0.285983	0.708459	0.403669	0.686456	0.863239
ENSG00000100292.17	402.086	-0.805349	0.352374	-2.2855	0.0222836	0.140697
ENSG00000100294.13	452.29	0.311472	0.327908	0.949875	0.342176	0.634574
ENSG00000100296.13	768.656	-0.0853876	0.266363	-0.320569	0.748537	0.895651
ENSG00000100297.16	3142.26	0.211258	0.258048	0.818677	0.412971	0.692057
ENSG00000100298.15	2.50748	-1.18124	2.58374	-0.457181	0.647541	NA
ENSG00000100299.18	391.69	0.112078	0.334696	0.334865	0.737727	0.890499
ENSG00000100300.18	816.101	0.169935	0.332183	0.51157	0.608952	0.820722
ENSG00000100302.7	34.8429	0.146278	0.633626	0.230858	0.817425	0.926501
ENSG00000100304.13	1609.89	-1.0238	0.305255	-3.3539	0.000797	0.0153856
ENSG00000100307.13	130.794	0.24692	0.458267	0.538811	0.590017	0.811054
ENSG00000100311.17	25.392	-1.65919	0.794205	-2.08912	0.036697	0.191697
ENSG00000100312.11	3.67296	-1.88347	1.91677	-0.982625	0.325792	NA
ENSG00000100314.4	33.2938	1.17845	0.690756	1.70602	0.0880038	0.311436
ENSG00000100316.16	20610.3	0.141614	0.250378	0.565603	0.571664	0.79851
ENSG00000100319.13	186.878	0.516385	0.376278	1.37235	0.169954	0.445281
ENSG00000100320.23	2174.75	0.391467	0.241362	1.62191	0.104823	0.342214
ENSG00000100321.15	396.68	0.173166	0.328929	0.526454	0.598573	0.814085
ENSG00000100324.14	505.984	-0.469554	0.342525	-1.37086	0.170418	0.445572
ENSG00000100325.15	851.256	-0.270005	0.280136	-0.963835	0.335129	0.627644
ENSG00000100330.16	1168.77	0.809647	0.26106	3.10138	0.00192618	0.0290092
ENSG00000100335.15	1464.69	-0.0737175	0.248024	-0.297219	0.7663	0.901122
ENSG00000100344.11	49.2911	-1.43455	0.596586	-2.40459	0.0161906	0.11477
ENSG00000100345.22	8218.92	0.386702	0.265035	1.45906	0.144548	0.409183
ENSG00000100346.18	8.81132	0.0372031	1.17493	0.031664	0.97474	NA
ENSG00000100347.15	807.337	-0.263867	0.276325	-0.954918	0.339619	0.632457
ENSG00000100348.10	792.305	0.107314	0.284755	0.376866	0.706273	0.874243
ENSG00000100350.14	1773.03	-0.307275	0.254539	-1.20718	0.227363	0.519159
ENSG00000100353.18	4016.87	0.609278	0.237981	2.5602	0.0104612	0.0877796
ENSG00000100354.21	783.79	-0.125265	0.264776	-0.473099	0.636143	0.836665
ENSG00000100359.21	1028.14	0.258797	0.263852	0.980843	0.32667	0.620123
ENSG00000100360.15	596.173	0.744431	0.276116	2.69608	0.00701617	0.0679526
ENSG00000100364.18	897.19	-0.569831	0.300842	-1.89412	0.0582093	0.249028
ENSG00000100372.15	651.094	0.100974	0.263281	0.383522	0.701333	0.871276
ENSG00000100376.12	550.167	-0.0727237	0.27041	-0.268938	0.787977	0.91141
ENSG00000100379.17	299.369	-0.70678	0.386506	-1.82864	0.0674541	0.270986
ENSG00000100380.14	4687.94	0.212516	0.231132	0.919459	0.357856	0.648768
ENSG00000100385.14	102.253	-1.4315	0.458677	-3.12092	0.00180286	0.0276171
ENSG00000100387.9	697.346	-0.0342165	0.29543	-0.115819	0.907796	0.965283
[truncated: 17,318 more rows]
