# Supplementary material for: Systematic identification and characterization of exon–intron circRNAs
Source: Genome Res. 2024 Mar;34(3):376–93. doi: 10.1101/gr.278590.123 (PMC11067877; doi:10.1101/gr.278590.123)
Supplement: Supplement 8 [file Supplemental_Table_S8.xlsx]

## Sheet: Table S8. SRSF1_KD_LIR_diff
Supplemental Table S8: Differential analysis of LIR in SRSF1 knockdown HEK293 cells using IRFinder
#Condition A combined: pooled_shSRSF1/IRFinder-IR-nondir.txt
#Condition A replicate 1: shSRSF1_rep1_irfinder/IRFinder-IR-nondir.txt
#Condition A replicate 2: shSRSF1_rep2_irfinder/IRFinder-IR-nondir.txt
#Condition B combined: pooled_shCtrl/IRFinder-IR-nondir.txt
#Condition B replicate 1: shCtrl_rep1_irfinder/IRFinder-IR-nondir.txt
#Condition B replicate 2: shCtrl_rep2_irfinder/IRFinder-IR-nondir.txt
Chr	Start	End	Intron-GeneName/GeneID	-	Direction	ExcludedBases	p-diff	p-increased	p-decreased	A-IRratio	A-IRok	A-IntronCover	A-IntronDepth	A-SplicesMax	A-SplicesExact	B-IRratio	B-IRok	B-IntronCover	B-IntronDepth	B-SplicesMax	B-SplicesExact	replicates	A1-IRratio	A2-IRratio	B1-IRratio	B2-IRratio
Chr14	21211306	21211405	HNRNPC/ENSG00000092199.17/known-exon	0	-	10	1.29306e-92	1	1.29306e-92	0.138547	-	1	463.189	2863	2859	0.0234709	NonUniformIntronCover	1	137.216	5709	5705	reps	0.103936	0.18801	0.0248043	0.0204654
Chr12	103943319	103943737	HSP90B1/ENSG00000166598.15/anti-over	0	+	10	8.05717e-60	1	8.05717e-60	0.204253	-	1	1071.9	4162	4044	0.0832084	-	1	406.97	4474	4418	reps	0.153524	0.259073	0.0457641	0.112671
Chr16	89561063	89561226	RPL13/ENSG00000167526.13/clean	0	+	10	1.79312e-57	1	1.79312e-57	0.0293172	-	1	1334.08	44171	44131	0.013526	-	1	549.254	40048	40043	reps	0.0234729	0.0396426	0.0171002	0.00734316
Chr9	137241829	137241910	TUBB4B/ENSG00000188229.6/anti-near	0	+	10	2.99018e-46	1	2.99018e-46	0.0680202	-	1	993.759	13455	13444	0.0295525	-	1	354.862	11592	11590	reps	0.0415371	0.0995759	0.0374458	0.0161089
Chr19	5693769	5694386	LONP1/ENSG00000196365.12/anti-near	0	-	10	4.24401e-45	1	4.24401e-45	0.43023	-	1	215.202	284	284	0.033181	NonUniformIntronCover	1	16.1646	471	471	reps	0.396166	0.499734	0.0358637	0.0253526
Chr19	5694901	5696053	LONP1/ENSG00000196365.12/anti-near	0	-	10	1.16749e-42	1	1.16749e-42	0.366204	NonUniformIntronCover	1	170.45	295	295	0.0267965	-	1	15.4192	559	559	reps	0.337684	0.416318	0.0323018	0.0175514
Chr19	5693462	5693551	LONP1/ENSG00000196365.12/anti-near	0	-	10	2.98243e-41	1	2.98243e-41	0.367551	-	1	202.242	348	346	0.0375	NonUniformIntronCover	1	22.6364	581	581	reps	0.342945	0.411439	0.0295777	0.0481928
Chr19	5692208	5693297	LONP1/ENSG00000196365.12/anti-near	0	-	44	2.61323e-34	1	2.61323e-34	0.340132	-	1	168.554	322	322	0.03189	-	1	15.9761	477	477	reps	0.29664	0.400794	0.0280554	0.0358
Chr19	5696757	5699026	LONP1/ENSG00000196365.12/anti-near	0	-	10	3.44737e-34	1	3.44737e-34	0.385745	-	0.981408	165.789	264	262	0.0322475	NonUniformIntronCover	0.965471	13.6287	409	409	reps	0.347412	0.429197	0.0305743	0.0332665
Chr17	44320731	44321057	SLC25A39/ENSG00000013306.16/anti-near	0	-	28	1.39181e-33	1	1.39181e-33	0.157245	-	1	230.058	1209	1201	0.0367108	NonUniformIntronCover	1	77.5917	1992	1988	reps	0.0947516	0.251424	0.0365565	0.036801
Chr7	151076186	151076286	SLC4A2/ENSG00000164889.14/known-exon+anti-near+anti-over	0	+	10	2.77911e-31	1	2.77911e-31	0.2556	-	1	222.5	641	641	0.035042	-	1	22.8056	626	626	reps	0.240531	0.279832	0.0438666	0.0260455
Chr17	81510329	81510479	ACTG1/ENSG00000184009.12/known-exon	0	-	11	1.25161e-29	1	1.25161e-29	0.831266	-	1	25061.1	5087	5069	0.738544	-	1	13903.4	4922	4901	reps	0.814584	0.84892	0.807423	0.662029
Chr5	178204740	178204814	HNRNPAB/ENSG00000197451.12/known-exon+anti-near	0	+	10	2.64987e-29	1	2.64987e-29	0.422295	-	1	1799.69	2460	2454	0.264122	-	1	766.654	2130	2130	reps	0.395568	0.456802	0.277278	0.241474
Chr19	5696170	5696248	LONP1/ENSG00000196365.12/anti-near	0	-	10	3.47863e-29	1	3.47863e-29	0.309557	-	1	133.607	298	298	0.0318886	-	1	16.1071	489	489	reps	0.306067	0.318807	0.0575975	0.0070922
Chr1	999613	999691	HES4/ENSG00000188290.11/clean	0	-	10	6.81873e-29	6.81873e-29	1	0.249788	-	1	1388.43	4170	3663	0.395064	-	1	1059.93	1623	1253	reps	0.235569	0.272144	0.380761	0.416227
Chr2	231711983	231712442	PTMA/ENSG00000187514.16/clean	0	+	10	3.83334e-28	1	3.83334e-28	0.0179014	-	1	189.331	10363	10322	0.00541529	NonUniformIntronCover	1	156.624	28766	28680	reps	0.0165965	0.0201465	0.00477968	0.00680629
Chr20	35284261	35284380	EIF6/ENSG00000242372.8/known-exon+anti-near	0	-	10	1.35378e-26	1	1.35378e-26	0.176124	-	1	421.778	1924	1917	0.0624767	-	1	111.956	1653	1651	reps	0.169739	0.184668	0.06457	0.0599711
Chr11	62671865	62671952	UQCC3/ENSG00000204922.5/anti-over	0	+	10	6.26213e-26	6.26213e-26	1	0.031638	-	1	22.9355	702	696	0.209329	-	1	168.645	637	634	reps	0.0164331	0.0579297	0.157781	0.296969
Chr19	1425960	1428841	DAZAP1/ENSG00000071626.17/clean	0	+	10	1.3653e-25	1	1.3653e-25	0.189202	-	1	222.618	766	766	0.0568015	-	1	95.8738	1488	1488	reps	0.15646	0.238884	0.0460754	0.0696917
Chr19	5696371	5696669	LONP1/ENSG00000196365.12/anti-near	0	-	10	2.3342e-25	1	2.3342e-25	0.33737	-	1	118.629	233	233	0.0447985	-	1	21.6207	461	459	reps	0.310213	0.372785	0.0684176	0.021242
Chr12	64425182	64425337	XPOT/ENSG00000184575.12/clean	0	+	10	2.80202e-25	1	2.80202e-25	0.34263	MinorIsoform	1	165.746	220	219	0.0967261	-	1	104.407	949	947	reps	0.294641	0.390892	0.0936403	0.0996143
Chr11	61415784	61416104	CPSF7/ENSG00000149532.15/clean	0	-	10	1.34715e-23	1	1.34715e-23	0.267897	-	1	291.645	797	794	0.0769516	NonUniformIntronCover	1	60.2742	722	722	reps	0.249444	0.295196	0.0409789	0.120392
Chr19	49497325	49497519	RPS11/ENSG00000142534.7/clean	0	+	10	1.93312e-23	1.93312e-23	1	0.013514	NonUniformIntronCover	1	409.851	29861	29861	0.0252765	-	1	607.068	23386	23386	reps	0.0134864	0.0133567	0.0247632	0.0258844
Chr3	48440458	48440540	TMA7/ENSG00000232112.3/known-exon+anti-near+anti-over	0	+	10	2.51981e-23	1	2.51981e-23	0.053352	-	1	148.9	2642	2510	0.00634283	-	1	13.3667	2094	2001	reps	0.0447744	0.0665334	0.00678127	0.00313925
Chr11	13710870	13711763	FAR1/ENSG00000197601.13/clean	0	+	10	3.83171e-23	1	3.83171e-23	0.257504	-	1	100.575	290	222	0.0403623	NonUniformIntronCover	1	28.769	678	675	reps	0.208674	0.28305	0.0241111	0.050411
Chr12	76048464	76049199	NAP1L1/ENSG00000187109.14/clean	0	-	215	1.05688e-22	1	1.05688e-22	0.0809023	-	1	104.572	1057	1057	0.0145257	NonUniformIntronCover	1	36.024	2427	2427	reps	0.0669184	0.0988635	0.00837328	0.0209041
Chr16	1961636	1961796	NDUFB10/ENSG00000140990.15/known-exon+anti-near	0	+	10	1.2837e-22	1	1.2837e-22	0.38263	-	1	754.267	1194	1184	0.223536	NonUniformIntronCover	1	562.25	1932	1911	reps	0.342737	0.449206	0.228891	0.21766
Chr11	14513699	14513816	PSMA1/ENSG00000129084.17/clean	0	-	10	4.16984e-22	1	4.16984e-22	0.0336048	-	1	117.186	3370	3354	0.00513541	NonUniformIntronCover	1	22.093	4280	4274	reps	0.0204023	0.0488201	0.00153985	0.00807382
Chr13	106557131	106559431	ARGLU1/ENSG00000134884.15/clean	0	-	78	4.91561e-22	4.91561e-22	1	0.246979	-	1	167.6	508	508	0.574441	-	1	402.256	291	280	reps	0.193407	0.304913	0.456411	0.701575
Chr12	110722269	110722471	PPP1CC/ENSG00000186298.12/known-exon	0	-	10	5.0666e-22	1	5.0666e-22	0.1558	-	1	214.821	1164	1125	0.0548854	-	1	128.167	2207	2200	reps	0.181045	0.130304	0.045107	0.065752
ChrX	154350207	154350908	FLNA/ENSG00000196924.18/clean	0	-	10	8.80182e-22	1	8.80182e-22	0.130542	-	1	287.372	1914	1908	0.0566475	-	1	239.116	3982	3979	reps	0.0922859	0.178732	0.0536876	0.0597252
Chr12	121327231	121328315	ANAPC5/ENSG00000089053.13/clean	0	-	10	1.2608e-20	1	1.2608e-20	0.144179	-	1	151.116	891	891	0.0331501	-	1	40.7326	1187	1187	reps	0.133816	0.15722	0.0245586	0.037933
Chr17	32480631	32480752	PSMD11/ENSG00000108671.11/known-exon	0	+	10	8.30782e-20	1	8.30782e-20	0.244142	-	1	235.467	729	598	0.0859219	-	1	94.8444	1009	962	reps	0.229083	0.259486	0.0955826	0.0774015
Chr10	97476744	97476834	MMS19/ENSG00000155229.21/clean	0	-	10	4.51135e-19	1	4.51135e-19	0.400357	MinorIsoform	1	210.312	315	131	0.103832	-	1	39.625	342	333	reps	0.369552	0.434629	0.156567	0.0708479
Chr19	9828393	9828591	UBL5/ENSG00000198258.10/anti-near	0	+	10	1.03573e-18	1	1.03573e-18	0.0932418	-	1	240.211	2282	2265	0.0319891	-	1	77.5263	2328	2321	reps	0.0853668	0.103515	0.0332799	0.0311767
ChrX	77521498	77522262	ATRX/ENSG00000085224.22/clean	0	-	10	1.36056e-18	1	1.36056e-18	0.330736	-	1	61.2781	109	109	0.0130008	NonUniformIntronCover	0.793103	2.99007	227	227	reps	0.209669	0.445532	0.0063874	0.015338
Chr1	171587221	171587647	PRRC2C/ENSG00000117523.16/clean	0	+	10	2.68082e-18	1	2.68082e-18	0.12023	-	1	90.0595	646	613	0.013449	-	1	10.756	789	770	reps	0.104849	0.138122	0.0191069	0.00825336
Chr9	137587107	137587716	ZMYND19/ENSG00000165724.6/known-exon	0	-	10	7.15541e-18	7.15541e-18	1	0.0592175	-	1	85.2905	1355	1349	0.165664	-	1	219.207	1101	1093	reps	0.0581032	0.0600033	0.143599	0.197903
Chr19	1422396	1425877	DAZAP1/ENSG00000071626.17/clean	0	+	10	8.2883e-18	1	8.2883e-18	0.182457	-	1	201.528	903	742	0.0700619	-	1	119.339	1584	1499	reps	0.157745	0.214724	0.0589387	0.0841119
Chr14	99501413	99502206	CCNK/ENSG00000090061.17/known-exon+anti-near+anti-over	0	+	10	2.74633e-17	1	2.74633e-17	0.141221	-	1	53.4444	251	250	0.0078965	-	1	4.4254	554	551	reps	0.131134	0.151992	0.00617714	0.00863329
Chr16	1984476	1984746	GFER/ENSG00000127554.13/anti-near	0	+	46	6.31286e-17	1	6.31286e-17	0.378987	-	1	226.411	371	316	0.144865	-	1	97.5778	576	570	reps	0.347111	0.419688	0.117311	0.215978
Chr19	55668792	55669082	U2AF2/ENSG00000063244.12/anti-over	0	+	83	6.46281e-17	1	6.46281e-17	0.142171	-	1	301.47	1819	1809	0.0635344	-	1	149.53	2204	2195	reps	0.162208	0.121278	0.0748315	0.0545636
Chr12	54286732	54286952	HNRNPA1/ENSG00000135486.18/known-exon+anti-near	0	+	10	8.76531e-17	8.76531e-17	1	0.201933	-	1	230.762	903	903	0.431089	-	1	249.298	328	328	reps	0.249123	0.158584	0.434035	0.435078
ChrX	23783709	23783799	SAT1/ENSG00000130066.16/known-exon+anti-near	0	+	10	9.61137e-17	9.61137e-17	1	0.0340471	-	1	110.5	3135	3048	0.0850899	-	1	233.625	2512	2448	reps	0.0425576	0.0290858	0.112324	0.0536883
Chr11	13711808	13711927	FAR1/ENSG00000197601.13/clean	0	+	10	1.74006e-16	1	1.74006e-16	0.203195	-	1	78.2889	240	239	0.0386844	NonUniformIntronCover	1	27.4444	682	669	reps	0.142794	0.242983	0.04	0.0373593
Chr17	7313721	7313905	GPS2/ENSG00000132522.16/anti-near	0	-	10	2.2528e-16	1	2.2528e-16	0.352787	-	1	206.043	356	341	0.129945	-	1	84.0857	549	547	reps	0.281437	0.435818	0.114176	0.146632
ChrX	41346410	41346504	DDX3X/ENSG00000215301.10/clean	0	+	21	3.16033e-16	3.16033e-16	1	0.0165705	NonUniformIntronCover	1	41.4839	2462	2456	0.0602317	-	1	146.258	2282	2277	reps	0.0251241	0.0128412	0.064987	0.0563367
Chr6	169705321	169705615	PHF10/ENSG00000130024.15/clean	0	-	10	4.15628e-16	1	4.15628e-16	0.544267	-	1	138.535	116	106	0.184258	-	1	85.8333	380	380	reps	0.470315	0.66195	0.188249	0.180271
Chr19	18435117	18435265	ISYNA1/ENSG00000105655.19/anti-near	0	-	28	9.24907e-16	1	9.24907e-16	0.0613228	-	1	124.125	1900	1885	0.0158882	NonUniformIntronCover	1	37.375	2315	2296	reps	0.0609002	0.0669264	0.0156152	0.0159592
Chr19	58545537	58545763	TRIM28/ENSG00000130726.12/clean	0	+	10	1.39023e-15	1	1.39023e-15	0.0575921	-	1	92.0341	1506	1490	0.0150379	-	1	50.8409	3326	3324	reps	0.0389422	0.0906667	0.0164389	0.0146853
Chr19	54129185	54129271	PRPF31/ENSG00000105618.14/known-exon	0	+	10	1.50034e-15	1	1.50034e-15	0.21466	-	1	309.688	1126	1125	0.0897574	-	1	93.875	951	951	reps	0.151794	0.281448	0.0935675	0.0813277
Chr11	212759	212836	RIC8A/ENSG00000177963.14/anti-near	0	+	10	1.86152e-15	1	1.86152e-15	0.311897	-	1	203.519	449	372	0.120634	-	1	90.8148	662	657	reps	0.254234	0.385006	0.138879	0.100095
Chr4	6708643	6709230	MRFAP1L1/ENSG00000178988.11/clean	0	-	10	2.47186e-15	1	2.47186e-15	0.281977	-	1	152.372	388	361	0.0940219	NonUniformIntronCover	1	65.4848	631	580	reps	0.226729	0.345249	0.0788467	0.106635
Chr2	131518708	131519049	SMPD4BP/ENSG00000152117.17/clean	0	+	10	2.57879e-15	1	2.57879e-15	0.602442	-	1	248.519	159	159	0.227646	-	1	71.9173	242	242	reps	0.680455	0.531912	0.247745	0.207695
Chr7	26192338	26192494	HNRNPA2B1/ENSG00000122566.21/clean	0	-	10	3.91897e-15	1	3.91897e-15	0.117703	-	1	1177.03	7665	7660	0.0839193	-	1	944.833	9468	9465	reps	0.112698	0.1242	0.0685897	0.111058
Chr16	1777443	1777746	SPSB3/ENSG00000162032.16/known-exon+anti-near+anti-over	0	-	10	4.08937e-15	4.08937e-15	1	0.130733	-	1	110.84	737	726	0.328426	-	1	177.521	363	358	reps	0.1552	0.100388	0.380393	0.272124
Chr5	179616218	179616868	HNRNPH1/ENSG00000169045.17/clean	0	-	19	5.77049e-15	1	5.77049e-15	0.172993	NonUniformIntronCover	1	399.115	1908	1452	0.0951684	-	1	276.198	2626	2139	reps	0.160941	0.186688	0.0775715	0.127792
Chr2	58163074	58163433	FANCL/ENSG00000115392.12/anti-near	0	-	10	8.06059e-15	1	8.06059e-15	0.448128	-	1	133.17	147	146	0.151169	-	1	72.305	397	397	reps	0.456179	0.436258	0.145221	0.155205
Chr19	1271467	1271550	CIRBP/ENSG00000099622.14/known-exon	0	+	10	8.69097e-15	8.69097e-15	1	0.0140178	NonUniformIntronCover	1	4.67742	329	325	0.213996	-	1	47.6452	175	175	reps	0.0126631	0.0127003	0.183549	0.290798
Chr14	99500871	99501355	CCNK/ENSG00000090061.17/known-exon+anti-near+anti-over	0	+	10	1.02206e-14	1	1.02206e-14	0.193617	MinorIsoform	1	80.9158	337	225	0.032399	-	1	16.0053	478	473	reps	0.160131	0.222589	0.0305206	0.0329543
Chr11	72109928	72110087	ANAPC15/ENSG00000110200.8/known-exon+anti-near+anti-over	0	-	39	1.19054e-14	1	1.19054e-14	0.126579	-	1	56.375	325	325	0.0205735	NonUniformIntronCover	1	20.3125	923	923	reps	0.115087	0.154853	0.0161657	0.0244794
Chr17	7222081	7222176	ACADVL/ENSG00000072778.20/anti-near	0	+	10	2.69094e-14	2.69094e-14	1	0.28083	-	1	225.314	573	573	0.5629	-	1	245.971	185	185	reps	0.307544	0.260123	0.612665	0.525734
Chr11	65720164	65720241	RNASEH2C/ENSG00000172922.11/anti-near	0	-	10	2.83038e-14	1	2.83038e-14	0.0499893	-	1	51.7778	984	984	0.007522	-	1	17.6667	2330	2330	reps	0.0341442	0.0935839	0.00809512	0.00678952
Chr6	52273356	52273741	MCM3/ENSG00000112118.20/clean	0	-	10	4.19524e-14	1	4.19524e-14	0.054132	-	1	75.7152	1307	1305	0.0077356	NonUniformIntronCover	1	11.6159	1489	1489	reps	0.0363608	0.0821642	0.00357748	0.0121057
Chr4	57023580	57023661	POLR2B/ENSG00000047315.17/clean	0	+	10	6.23835e-14	1	6.23835e-14	0.201718	-	1	268.862	1063	1063	0.0807342	-	1	71.1379	810	810	reps	0.157429	0.238755	0.063605	0.0991722
Chr17	81869406	81869541	ARHGDIA/ENSG00000141522.12/anti-near	0	-	10	8.99948e-14	1	8.99948e-14	0.0691579	-	1	323.039	4327	4292	0.0335496	NonUniformIntronCover	1	138.51	3988	3978	reps	0.0624193	0.076831	0.044829	0.0231508
Chr11	212981	213298	RIC8A/ENSG00000177963.14/anti-near	0	+	10	9.87286e-14	1	9.87286e-14	0.345683	-	1	179.098	279	279	0.12873	NonUniformIntronCover	1	68.2602	457	457	reps	0.310513	0.39653	0.156594	0.0875371
Chr4	2261824	2261916	MXD4/ENSG00000123933.17/clean	0	-	10	1.30236e-13	1	1.30236e-13	0.105207	-	1	49.2647	410	410	0.0103299	NonUniformIntronCover	1	7.58824	722	721	reps	0.0775321	0.158989	0.014418	0.00574713
Chr17	39989929	39990093	PSMD3/ENSG00000108344.15/clean	0	+	10	1.56198e-13	1	1.56198e-13	0.0795597	-	1	147.806	1707	1707	0.0283172	NonUniformIntronCover	1	66.5323	2283	2283	reps	0.0767781	0.0799431	0.0257501	0.0318949
Chr6	35468873	35468946	RPL10A/ENSG00000198755.11/known-exon+anti-near	0	+	10	1.65933e-13	1	1.65933e-13	0.0425793	-	1	543.148	12213	12171	0.0246637	-	1	245.667	9715	9700	reps	0.0359763	0.0511126	0.0278238	0.01989
Chr6	43225881	43226032	DNPH1/ENSG00000112667.13/known-exon+anti-near	0	-	10	2.25283e-13	1	2.25283e-13	0.296212	-	1	389.316	912	912	0.162718	-	1	218.439	1121	1119	reps	0.278537	0.335768	0.170488	0.148942
Chr21	43798100	43799569	RRP1/ENSG00000160214.13/clean	0	+	10	2.92619e-13	1	2.92619e-13	0.193246	NonUniformIntronCover	1	59.8838	250	208	0.0359145	-	1	20.3026	545	536	reps	0.216351	0.155513	0.031601	0.0363492
ChrX	154367544	154367640	FLNA/ENSG00000196924.18/clean	0	-	10	3.25954e-13	1	3.25954e-13	0.0448515	-	1	53.25	1134	1129	0.00879637	NonUniformIntronCover	1	27.9722	3152	3145	reps	0.0237173	0.0647182	0.00991992	0.00787928
Chr20	43710062	43711487	MYBL2/ENSG00000101057.16/clean	0	+	10	3.50852e-13	1	3.50852e-13	0.0650989	-	1	161.616	2131	2119	0.0250833	-	1	77.7778	2996	2986	reps	0.0490807	0.0866755	0.023618	0.0259543
Chr1	228493274	228493882	RNF187/ENSG00000168159.13/clean	0	+	10	6.26506e-13	1	6.26506e-13	0.105488	-	1	115.333	978	952	0.0347994	-	1	57.0375	1582	1574	reps	0.112145	0.0954893	0.0420178	0.0266886
ChrX	153796552	153797457	SSR4/ENSG00000180879.14/known-exon+anti-near	0	+	10	7.44246e-13	1	7.44246e-13	0.0275898	NonUniformIntronCover	1	39.8635	1405	1293	0.00237813	-	1	6.01671	2524	2420	reps	0.0190079	0.0428368	0.00223202	0.00190527
Chr11	33141762	33141884	CSTF3/ENSG00000176102.13/known-exon	0	-	10	9.29794e-13	9.29794e-13	1	0.0524838	-	1	83.6957	1511	1509	0.135781	-	1	143.13	911	910	reps	0.0442087	0.0618161	0.0929352	0.175033
ChrX	54446414	54447310	FGD1/ENSG00000102302.8/known-exon+anti-near+anti-over	0	-	10	9.38787e-13	1	9.38787e-13	0.507765	-	1	115.534	110	110	0.170219	-	1	56.4129	275	275	reps	0.412232	0.601738	0.155757	0.182053
Chr2	241337516	241337672	SEPTIN2/ENSG00000168385.18/clean	0	+	10	1.08093e-12	1	1.08093e-12	0.155453	-	1	104.55	568	567	0.055254	-	1	80.0667	1369	1368	reps	0.164053	0.146593	0.0561861	0.0531845
Chr11	34456202	34456664	CAT/ENSG00000121691.7/clean	0	+	10	1.24162e-12	1	1.24162e-12	0.138791	-	1	20.9505	130	129	0.00112858	NonUniformIntronCover	0.422566	0.39011	374	374	reps	0.079211	0.291562	0.00215029	0.0013357
Chr1	244842258	244843040	COX20/ENSG00000203667.10/known-exon+anti-near+anti-over	0	+	10	1.29391e-12	1.29391e-12	1	0.20479	-	1	155.29	603	603	0.409859	-	1	263.219	379	379	reps	0.206023	0.197633	0.272622	0.549459
Chr12	53290212	53290346	ESPL1/ENSG00000135476.12/clean	0	+	10	1.30314e-12	1	1.30314e-12	0.455176	-	1	110.28	115	114	0.169309	-	1	93.96	461	450	reps	0.386691	0.540717	0.259932	0.104219
Chr2	182956593	182957456	NCKAP1/ENSG00000061676.15/clean	0	-	10	1.46782e-12	1	1.46782e-12	0.111282	-	1	71.7493	573	573	0.0126961	-	1	6.69971	521	521	reps	0.0810948	0.132736	0.00190634	0.0232522
Chr17	75521510	75521704	TSEN54/ENSG00000182173.13/clean	0	+	10	1.63764e-12	1	1.63764e-12	0.369888	-	1	116.23	198	176	0.11273	-	1	40.7838	321	310	reps	0.323103	0.429401	0.139697	0.0755098
Chr20	35003283	35003409	TRPC4AP/ENSG00000100991.12/anti-near	0	-	10	1.77201e-12	1	1.77201e-12	0.179987	-	1	138.5	622	622	0.0539914	-	1	33.9583	594	594	reps	0.152424	0.228724	0.0784278	0.0246479
ChrX	77520916	77521402	ATRX/ENSG00000085224.22/clean	0	-	87	2.41617e-12	1	2.41617e-12	0.365349	-	1	72.5342	126	110	0.0724211	-	1	17.2547	221	221	reps	0.26959	0.453001	0.0494898	0.0861545
Chr3	172757165	172758979	ECT2/ENSG00000114346.13/clean	0	+	10	2.66179e-12	1	2.66179e-12	0.120478	NonUniformIntronCover	1	49.7244	356	356	0.00442769	-	0.870843	1.45429	327	327	reps	0.0822009	0.148715	0.00347932	0.00301693
Chr16	2973064	2973137	PKMYT1/ENSG00000127564.17/known-exon+anti-near+anti-over	0	-	10	3.0825e-12	3.0825e-12	1	0.180109	-	1	332.148	1508	1500	0.303472	-	1	365.111	838	832	reps	0.197195	0.156488	0.310638	0.293931
Chr16	1962656	1962735	RPS2/ENSG00000140988.16/anti-near	0	-	10	3.14195e-12	3.14195e-12	1	0.012226	-	1	1414.14	114207	114108	0.0162879	-	1	996.103	60160	60075	reps	0.0118103	0.012705	0.0156863	0.0175333
Chr10	97476963	97477346	MMS19/ENSG00000155229.21/clean	0	-	10	3.44054e-12	1	3.44054e-12	0.351329	MinorIsoform	1	185.232	159	159	0.113839	-	1	35.8411	272	271	reps	0.310643	0.390737	0.119911	0.108206
Chr2	58162947	58163028	FANCL/ENSG00000115392.12/anti-near	0	-	10	3.62715e-12	1	3.62715e-12	0.545227	-	1	165.448	138	122	0.239739	-	1	115.414	363	361	reps	0.537407	0.553025	0.197088	0.260024
Chr22	38741571	38742300	SUN2/ENSG00000100242.15/anti-over	0	-	10	4.80184e-12	4.80184e-12	1	0.0481025	-	1	41.7405	825	825	0.174084	-	1	73.9827	351	351	reps	0.0441687	0.0567819	0.201325	0.145191
Chr1	28208413	28209971	DNAJC8/ENSG00000126698.11/clean	0	-	406	5.14629e-12	1	5.14629e-12	0.0602975	MinorIsoform	1	63.0758	983	620	0.0145918	-	1	32.0887	2167	2107	reps	0.0470654	0.0755636	0.0108236	0.0200485
Chr22	38740432	38741006	SUN2/ENSG00000100242.15/anti-over	0	-	10	6.90676e-12	6.90676e-12	1	0.088507	-	1	65.1549	671	663	0.257906	-	1	95.9204	276	270	reps	0.0705196	0.113521	0.241255	0.259641
Chr12	98544349	98544441	TMPO/ENSG00000120802.13/clean	0	+	10	7.16948e-12	1	7.16948e-12	0.124835	-	1	38.9412	214	214	0.0201015	NonUniformIntronCover	1	18.6471	890	887	reps	0.113043	0.138265	0.0244855	0.0164132
ChrX	48577109	48577464	RBM3/ENSG00000102317.18/known-exon+anti-near	0	+	10	7.86506e-12	1	7.86506e-12	0.0651779	-	1	145.719	2090	2063	0.0257878	-	1	75.6259	2857	2855	reps	0.0494555	0.089588	0.0204789	0.0313421
Chr8	144085138	144085288	GPAA1/ENSG00000197858.11/clean	0	+	10	1.02032e-11	1	1.02032e-11	0.282965	-	1	138.911	352	343	0.110546	-	1	71.4643	575	562	reps	0.253589	0.336146	0.111199	0.111333
Chr10	68341680	68341758	HNRNPH3/ENSG00000096746.17/known-exon+anti-near+anti-over	0	+	10	1.07382e-11	1	1.07382e-11	0.112456	-	1	246.821	1948	1916	0.0581793	-	1	170	2752	2747	reps	0.128475	0.0973673	0.075018	0.0356875
Chr11	64203622	64204053	STIP1/ENSG00000168439.17/known-exon	0	+	10	1.305e-11	1	1.305e-11	0.03358	-	1	174.012	5008	5001	0.0130255	-	1	59.6391	4519	4514	reps	0.0326253	0.0349709	0.0156653	0.00955974
Chr16	24570499	24570875	RBBP6/ENSG00000122257.20/clean	0	+	10	1.37011e-11	1	1.37011e-11	0.15112	-	1	37.9189	210	210	0.0126991	NonUniformIntronCover	1	4.93919	384	384	reps	0.186244	0.112327	0.0152722	0.00692078
Chr12	53289594	53290084	ESPL1/ENSG00000135476.12/clean	0	+	10	1.47715e-11	1	1.47715e-11	0.443852	-	1	99.7604	125	99	0.167951	-	1	90.026	446	434	reps	0.420086	0.47198	0.224771	0.12347
Chr16	681880	682019	STUB1/ENSG00000103266.11/known-exon+anti-near+anti-over	0	+	33	1.67843e-11	1	1.67843e-11	0.428937	-	1	1584.86	2067	2031	0.330428	-	1	1064.95	2099	2081	reps	0.413679	0.456286	0.326327	0.334355
Chr17	59934260	59934433	RPS6KB1/ENSG00000108443.14/clean	0	+	10	1.78299e-11	1	1.78299e-11	0.102605	-	1	31.3284	269	267	0.00106731	NonUniformIntronCover	0.380368	0.208955	356	356	reps	0.0756384	0.122678	0.000978932	0.00112733
Chr12	56273254	56273586	CS/ENSG00000062485.19/anti-near	0	-	10	1.94525e-11	1	1.94525e-11	0.0301533	-	1	66.1923	2128	2128	0.00691215	NonUniformIntronCover	1	23.1846	3331	3330	reps	0.0238965	0.0373896	0.00512523	0.00834471
Chr9	35660461	35660556	CCDC107/ENSG00000159884.12/known-exon+anti-near+anti-over	0	+	10	1.9884e-11	1.9884e-11	1	0.17614	-	1	43.8286	205	199	0.51239	NonUniformIntronCover	1	137.657	131	128	reps	0.201309	0.13355	0.493349	0.534857
Chr2	201704218	201704453	ALS2/ENSG00000003393.15/clean	0	-	10	2.04919e-11	1	2.04919e-11	0.379369	-	1	44.011	67	67	0.0186981	NonUniformIntronCover	1	2.07692	109	109	reps	0.412122	0.354489	0.0455359	0.00507218
Chr2	26191395	26191482	HADHA/ENSG00000084754.12/known-exon+anti-near	0	-	10	2.10987e-11	1	2.10987e-11	0.0646525	-	1	102.645	1483	1483	0.0119645	NonUniformIntronCover	1	11.6129	959	959	reps	0.0617274	0.0679198	0.0140462	0.00905107
Chr16	682076	682164	STUB1/ENSG00000103266.11/known-exon+anti-near+anti-over	0	+	10	2.41533e-11	1	2.41533e-11	0.401446	-	1	1481.56	2209	2192	0.307785	-	1	1018.22	2290	2280	reps	0.393112	0.415844	0.305596	0.311753
Chr16	682281	682363	STUB1/ENSG00000103266.11/known-exon+anti-near+anti-over	0	+	10	3.70521e-11	1	3.70521e-11	0.399936	-	1	1382.97	2075	2075	0.303933	-	1	927.867	2125	2125	reps	0.394193	0.411797	0.298924	0.312001
Chr16	1778048	1778133	SPSB3/ENSG00000162032.16/known-exon+anti-near+anti-over	0	-	10	3.83196e-11	3.83196e-11	1	0.272238	-	1	205.742	528	528	0.50486	-	1	239.613	225	225	reps	0.317588	0.212493	0.476811	0.535774
Chr2	37202865	37202949	CEBPZ/ENSG00000115816.15/known-exon+anti-near+anti-over	0	-	10	3.8899e-11	3.8899e-11	1	0.314551	-	1	291.4	634	634	0.50677	-	1	471.6	456	456	reps	0.301375	0.327879	0.444444	0.555369
Chr7	128335679	128335846	RBM28/ENSG00000106344.8/clean	0	-	10	4.74139e-11	1	4.74139e-11	0.47349	-	1	193.349	211	211	0.208182	-	1	82.5556	313	313	reps	0.543408	0.405011	0.162552	0.256874
Chr5	95516586	95516671	TTC37/ENSG00000198677.12/clean	0	-	10	6.13261e-11	1	6.13261e-11	0.331309	-	1	51.0323	103	96	0.0715122	NonUniformIntronCover	1	23.6452	307	306	reps	0.359454	0.29991	0.0500585	0.0868619
Chr1	26473732	26474084	HMGN2/ENSG00000198830.11/known-exon	0	+	95	6.36677e-11	6.36677e-11	1	0.0231117	-	1	157.66	6620	6618	0.0413429	-	1	413.534	9550	9549	reps	0.0202315	0.0272738	0.0356403	0.0468789
Chr16	1777872	1777945	SPSB3/ENSG00000162032.16/known-exon+anti-near+anti-over	0	-	10	6.65711e-11	6.65711e-11	1	0.283415	-	1	208.037	526	517	0.517521	-	1	247.778	231	229	reps	0.325878	0.224849	0.525633	0.506594
Chr22	38739426	38739721	SUN2/ENSG00000100242.15/anti-over	0	-	10	7.84096e-11	7.84096e-11	1	0.0493759	NonUniformIntronCover	1	36.7739	706	700	0.181444	-	1	63.1739	285	280	reps	0.036809	0.0675237	0.178498	0.190232
Chr12	57098902	57099014	STAT6/ENSG00000166888.12/anti-near	0	-	10	8.22766e-11	1	8.22766e-11	0.386602	-	1	76.2619	121	118	0.0901213	-	1	19.8095	200	200	reps	0.321531	0.459133	0.080767	0.101328
Chr12	132676653	132677362	POLE/ENSG00000177084.18/clean	0	-	10	8.81046e-11	1	8.81046e-11	0.158203	-	1	53.3737	284	275	0.030205	NonUniformIntronCover	1	15.9466	512	499	reps	0.17699	0.13962	0.0410055	0.0254013
Chr19	2430952	2431547	LMNB2/ENSG00000176619.13/anti-near	0	-	10	9.24513e-11	1	9.24513e-11	0.0605681	-	1	79.7532	1147	1143	0.0142064	NonUniformIntronCover	1	18.9362	1303	1301	reps	0.0418239	0.0827804	0.0154811	0.0119897
Chr19	1271632	1271980	CIRBP/ENSG00000099622.14/known-exon	0	+	17	1.12713e-10	1.12713e-10	1	0.0120611	NonUniformIntronCover	1	9.47368	773	773	0.0807797	-	1	48.4211	551	551	reps	0.0118294	0.0123166	0.0747826	0.0924259
Chr16	29996391	29996546	INO80E/ENSG00000169592.15/anti-near	0	+	10	1.50115e-10	1	1.50115e-10	0.153623	-	1	173.339	955	921	0.064085	NonUniformIntronCover	1	63.4746	927	922	reps	0.107319	0.212883	0.068034	0.0564827
Chr17	82080590	82080691	FASN/ENSG00000169710.9/clean	0	-	10	1.63203e-10	1.63203e-10	1	0.0296184	-	1	75.7568	2469	2469	0.0672564	-	1	191.297	2641	2641	reps	0.0420972	0.0120836	0.0897891	0.0469005
Chr6	31954442	31954554	NELFE/ENSG00000204356.14/anti-near	0	-	10	1.63374e-10	1	1.63374e-10	0.0471985	-	1	59.0476	1192	1191	0.00794361	NonUniformIntronCover	1	10.7857	1345	1345	reps	0.0324733	0.0702062	0.00692113	0.009417
Chr11	13714680	13721729	FAR1/ENSG00000197601.13/clean	0	+	1890	1.68078e-10	1	1.68078e-10	0.206945	NonUniformIntronCover	1	84.8077	312	310	0.0625555	-	1	35.5002	530	530	reps	0.153805	0.238255	0.0486257	0.0717642
Chr11	47565796	47565905	NDUFS3/ENSG00000213619.10/known-exon+anti-near	0	+	18	1.76348e-10	1	1.76348e-10	0.577405	-	1	1030.22	738	726	0.421666	-	1	629.946	856	855	reps	0.573938	0.58195	0.445473	0.381499
Chr11	62678743	62678864	UBXN1/ENSG00000162191.13/clean	0	-	10	2.47572e-10	1	2.47572e-10	0.0979935	-	1	213.911	1968	1968	0.04368	-	1	70.9333	1553	1551	reps	0.104935	0.0894469	0.0613088	0.0253075
Chr17	59931722	59934169	RPS6KB1/ENSG00000108443.14/clean	0	+	180	3.17153e-10	1	3.17153e-10	0.144567	-	1	37.8556	210	208	0.00773707	NonUniformIntronCover	0.765329	2.05072	263	263	reps	0.0844378	0.193697	0.00237104	0.0118727
Chr5	95516750	95516915	TTC37/ENSG00000198677.12/clean	0	-	10	3.18491e-10	1	3.18491e-10	0.395522	-	1	47.1111	67	65	0.0871836	-	1	22.254	233	226	reps	0.475845	0.330482	0.0485437	0.121203
Chr22	21629761	21629850	YDJC/ENSG00000161179.14/clean	0	-	10	3.40306e-10	1	3.40306e-10	0.455082	-	1	343.242	380	380	0.282973	-	1	337.818	834	834	reps	0.411618	0.526625	0.314188	0.240785
Chr17	44320436	44320621	SLC25A39/ENSG00000013306.16/anti-near	0	-	10	3.55722e-10	1	3.55722e-10	0.068201	-	1	119.451	1632	1617	0.0266399	NonUniformIntronCover	1	61.1972	2236	2214	reps	0.0434314	0.10412	0.0369794	0.0127003
Chr17	82019219	82019292	CENPX/ENSG00000169689.15/known-exon+anti-near	0	-	10	3.59053e-10	1	3.59053e-10	0.16124	-	1	239.333	1245	1075	0.0842242	-	1	136.852	1488	1353	reps	0.154266	0.177213	0.111052	0.0554085
Chr9	136404693	136405090	ENTR1/ENSG00000165689.17/clean	0	-	97	3.59173e-10	1	3.59173e-10	0.2561	-	1	194.167	564	498	0.133542	-	1	166.917	1083	1049	reps	0.238998	0.27982	0.131314	0.136251
Chr22	38741050	38741493	SUN2/ENSG00000100242.15/anti-over	0	-	10	3.71324e-10	3.71324e-10	1	0.0510755	-	1	39.0229	725	725	0.171086	-	1	65.6343	318	318	reps	0.0442599	0.0616991	0.20084	0.141485
Chr21	29066777	29066890	CCT8/ENSG00000156261.13/anti-near	0	-	10	3.91238e-10	1	3.91238e-10	0.0421001	-	1	89.7907	2043	2043	0.0123911	NonUniformIntronCover	1	28.7442	2291	2291	reps	0.0326283	0.0504266	0.0109959	0.0134423
Chr17	63821843	63821983	FTSJ3/ENSG00000108592.17/anti-near	0	-	10	3.92541e-10	1	3.92541e-10	0.19049	NonUniformIntronCover	1	51.7692	220	167	0.0375489	-	1	14.9423	383	379	reps	0.190395	0.192571	0.0374748	0.0313629
Chr16	1745103	1747028	MAPK8IP3/ENSG00000138834.13/anti-near	0	+	10	4.13774e-10	1	4.13774e-10	0.591483	MinorIsoform	1	236.004	70	70	0.274495	-	1	76.0482	189	188	reps	0.569903	0.623648	0.253125	0.293082
Chr1	32329160	32330577	HDAC1/ENSG00000116478.12/anti-near	0	+	10	4.76049e-10	1	4.76049e-10	0.154087	-	1	287.076	1426	1423	0.0848419	-	1	157.51	1646	1646	reps	0.118618	0.203368	0.075134	0.0966054
Chr12	51048478	51049033	LETMD1/ENSG00000050426.16/clean	0	+	71	6.68648e-10	6.68648e-10	1	0.0643703	-	1	25.1804	360	353	0.24346	-	1	65.0052	197	187	reps	0.0869089	0.039089	0.222153	0.273383
Chr19	2235828	2235922	PLEKHJ1/ENSG00000104886.12/known-exon+anti-near	0	-	10	8.83518e-10	1	8.83518e-10	0.15426	-	1	97.7647	536	534	0.0577654	-	1	55.9118	910	910	reps	0.135351	0.202297	0.0553032	0.062003
Chr6	169712539	169714732	PHF10/ENSG00000130024.15/clean	0	-	10	9.59217e-10	1	9.59217e-10	0.169559	NonUniformIntronCover	1	50.024	245	224	0.0446062	-	1	31.3749	672	667	reps	0.171402	0.166034	0.0488093	0.0403064
Chr15	101281782	101284966	SNRPA1/ENSG00000131876.17/clean	0	-	241	9.92106e-10	1	9.92106e-10	0.133592	-	1	100.841	654	652	0.0509464	NonUniformIntronCover	0.977914	56.419	1051	1048	reps	0.124928	0.137275	0.0392688	0.0674051
Chr19	48137084	48137521	LIG1/ENSG00000105486.14/clean	0	-	10	1.0026e-09	1	1.0026e-09	0.159872	-	1	47.193	248	225	0.0344428	NonUniformIntronCover	1	18.9415	531	519	reps	0.136721	0.2034	0.0240324	0.0415594
Chr2	54973621	54973820	RTN4/ENSG00000115310.18/anti-near	0	-	10	1.0847e-09	1	1.0847e-09	0.0725956	-	1	37.1039	473	470	0.0163815	NonUniformIntronCover	1	29.961	1799	1747	reps	0.0981422	0.0511055	0.0191762	0.0151486
Chr22	20995026	20995745	LZTR1/ENSG00000099949.21/anti-near	0	+	137	1.6168e-09	1	1.6168e-09	0.305409	-	1	63.3162	144	128	0.0692913	-	1	16.0812	216	210	reps	0.32614	0.270581	0.0871752	0.0311179
Chr12	57517180	57517268	DDIT3/ENSG00000175197.12/anti-over	0	-	10	1.67312e-09	1.67312e-09	1	0.100111	-	1	106.688	959	949	0.23095	-	1	98.5	328	319	reps	0.125517	0.0846959	0.250298	0.205786
Chr12	64425457	64425814	XPOT/ENSG00000184575.12/clean	0	+	10	1.80775e-09	1	1.80775e-09	0.049554	-	1	27.2158	522	519	0.00573492	NonUniformIntronCover	1	7.2446	1254	1253	reps	0.0382171	0.0595447	0.0104216	0.00293361
Chr16	672002	672083	RHOT2/ENSG00000140983.14/clean	0	+	10	1.89103e-09	1	1.89103e-09	0.153626	-	1	194.034	1069	1068	0.0785931	-	1	121.207	1421	1418	reps	0.138529	0.180474	0.110902	0.0452786
Chr12	111888618	111888884	MAPKAPK5/ENSG00000089022.14/clean	0	+	10	2.59123e-09	1	2.59123e-09	0.0872713	-	1	39.2981	411	390	0.00867093	NonUniformIntronCover	1	4.16346	476	473	reps	0.0680045	0.107182	0.0114817	0.00611621
Chr16	88720283	88720384	PIEZO1/ENSG00000103335.22/known-exon+anti-near	0	-	10	2.72728e-09	2.72728e-09	1	0.0776353	-	1	64.8108	756	756	0.18836	-	1	115.108	483	483	reps	0.066886	0.0935673	0.199652	0.177544
Chr7	2378766	2379133	EIF3B/ENSG00000106263.18/clean	0	+	10	2.7395e-09	1	2.7395e-09	0.0351414	-	1	37.0769	1011	1011	0.00671246	NonUniformIntronCover	1	15.8741	2345	2345	reps	0.035447	0.0351555	0.0114884	0.00145073
Chr1	93127299	93129277	MTF2/ENSG00000143033.18/clean	0	+	493	2.91531e-09	1	2.91531e-09	0.164814	-	1	54.0706	274	266	0.0316718	-	0.80202	11.7748	360	296	reps	0.150823	0.175618	0.0254527	0.030608
ChrX	111711725	111712483	ALG13/ENSG00000101901.12/anti-near	0	+	10	3.71817e-09	1	3.71817e-09	0.564916	MinorIsoform	1	29.8633	16	16	0.0865422	-	1	10.99	109	109	reps	0.456311	0.673203	0.0826273	0.0860625
Chr9	137367989	137372904	EXD3/ENSG00000187609.16/clean	0	-	10	4.65627e-09	1	4.65627e-09	0.339225	MinorIsoform	1	43.6368	85	57	0.0326086	-	0.827523	3.40448	101	100	reps	0.3419	0.340257	0.0246279	0.029781
Chr20	2660365	2660456	IDH3B/ENSG00000101365.21/anti-near	0	-	10	4.68607e-09	4.68607e-09	1	0.0222812	-	1	42	1843	1837	0.0633456	-	1	82.5758	1221	1209	reps	0.0203562	0.0241571	0.071143	0.0526572
Chr1	155914320	155915872	KHDC4/ENSG00000132680.11/known-exon	0	-	306	5.74738e-09	5.74738e-09	1	0.365924	-	1	203.716	351	349	0.618737	-	1	274.264	166	166	reps	0.436698	0.323521	0.51305	0.710601
Chr1	42754990	42755164	P3H1/ENSG00000117385.16/clean	0	-	10	5.87963e-09	5.87963e-09	1	0.0873664	-	1	37.9091	396	394	0.24842	-	1	92.8788	281	279	reps	0.0917098	0.081936	0.312303	0.205153
Chr14	94055184	94057821	DDX24/ENSG00000089737.17/clean	0	-	168	6.72958e-09	6.72958e-09	1	0.0537816	NonUniformIntronCover	1	56.4975	979	976	0.12824	-	1	126.069	857	853	reps	0.0490385	0.0603613	0.107753	0.152542
Chr17	75225237	75225341	NUP85/ENSG00000125450.11/clean	0	+	10	6.80391e-09	1	6.80391e-09	0.123983	-	1	33.6842	225	208	0.0174546	-	1	7.76316	421	421	reps	0.118485	0.133656	0.0197537	0.0156627
Chr12	67292776	67295032	CAND1/ENSG00000111530.13/clean	0	+	103	6.97579e-09	1	6.97579e-09	0.0826025	-	1	46.0104	511	497	0.0172235	NonUniformIntronCover	1	14.0904	804	799	reps	0.0617711	0.0947154	0.0112053	0.0195507
Chr12	53306861	53306965	C12orf10/ENSG00000139637.14/anti-near	0	+	10	7.13627e-09	1	7.13627e-09	0.168639	-	1	66.7368	329	329	0.0392281	NonUniformIntronCover	1	14.6579	359	359	reps	0.162631	0.175614	0.0375587	0.0403411
Chr15	66527383	66527856	ZWILCH/ENSG00000174442.12/clean	0	+	10	7.16674e-09	1	7.16674e-09	0.300774	-	1	55.9198	118	118	0.0729014	-	1	17.2995	212	212	reps	0.2896	0.310839	0.0600123	0.0748581
Chr16	683909	684065	JMJD8/ENSG00000161999.13/anti-near	0	-	10	7.45053e-09	1	7.45053e-09	0.396293	MinorIsoform	1	474.6	723	444	0.252009	-	1	217.983	647	556	reps	0.395397	0.405735	0.227856	0.293573
Chr2	97658117	97658223	ACTR1B/ENSG00000115073.8/clean	0	-	10	8.48513e-09	8.48513e-09	1	0.0587899	-	1	20.55	328	328	0.217066	-	1	70.975	256	255	reps	0.065852	0.050786	0.198085	0.238626
Chr19	46725648	46727451	STRN4/ENSG00000090372.15/clean	0	-	10	8.86013e-09	1	8.86013e-09	0.164007	NonUniformIntronCover	1	89.2629	455	439	0.064794	-	1	61.662	886	882	reps	0.121486	0.227628	0.0715847	0.0586039
Chr6	99488295	99488680	USP45/ENSG00000123552.17/clean	0	-	10	9.14265e-09	1	9.14265e-09	0.269903	-	1	26.9868	73	68	0.0258065	NonUniformIntronCover	1	4.23841	160	160	reps	0.195052	0.355187	0.00741873	0.0378723
Chr16	668569	668655	RHOT2/ENSG00000140983.14/clean	0	+	10	9.50015e-09	1	9.50015e-09	0.247851	-	1	268.562	748	745	0.144768	-	1	175.875	1002	997	reps	0.224978	0.27548	0.153695	0.134589
Chr11	72230898	72230992	INPPL1/ENSG00000165458.14/clean	0	+	10	9.52894e-09	1	9.52894e-09	0.147739	-	1	73.5	424	422	0.0515618	NonUniformIntronCover	1	42.6765	785	782	reps	0.13989	0.170149	0.0649221	0.0415118
Chr19	6419260	6420072	KHSRP/ENSG00000088247.17/clean	0	-	10	9.84168e-09	1	9.84168e-09	0.0289248	-	1	88.1677	2960	2587	0.0094404	NonUniformIntronCover	1	29.7919	3126	3116	reps	0.025874	0.0310357	0.0120047	0.00742059
Chr8	143613603	143613750	TSTA3/ENSG00000104522.16/clean	0	-	14	1.0331e-08	1	1.0331e-08	0.188685	-	1	84.6545	353	353	0.0573257	-	1	23.2909	379	379	reps	0.153846	0.217565	0.0787194	0.0289358
Chr11	61876455	61876865	FADS3/ENSG00000221968.9/clean	0	-	10	1.06032e-08	1.06032e-08	1	0.21325	-	1	100.831	357	354	0.441945	-	1	139.381	176	170	reps	0.19576	0.246107	0.406049	0.529214
Chr4	56994866	56995250	POLR2B/ENSG00000047315.17/clean	0	+	10	1.1059e-08	1	1.1059e-08	0.101627	-	1	68.2133	580	578	0.0216212	NonUniformIntronCover	1	11.16	502	502	reps	0.0992167	0.100565	0.020093	0.0234955
Chr18	59900235	59902646	PMAIP1/ENSG00000141682.12/clean	0	+	171	1.40055e-08	1.40055e-08	1	0.018181	NonUniformIntronCover	1	54.0346	2911	2875	0.0448211	-	1	105.157	2241	2202	reps	0.020158	0.0168989	0.0537984	0.0348449
Chr7	24863599	24865341	OSBPL3/ENSG00000070882.13/clean	0	-	10	1.49012e-08	1	1.49012e-08	0.167176	-	1	24.6902	123	111	0.00266515	-	0.395497	0.239193	148	148	reps	0.18262	0.159783	0.00596142	0.00201002
Chr6	169714842	169715707	PHF10/ENSG00000130024.15/clean	0	-	10	1.54357e-08	1	1.54357e-08	0.157567	-	1	44.8892	229	228	0.0432974	-	1	28.3761	625	625	reps	0.173722	0.150538	0.0440666	0.0377874
Chr2	130342935	130343085	IMP4/ENSG00000136718.10/anti-near	0	+	37	1.65587e-08	1	1.65587e-08	0.367873	NonUniformIntronCover	1	165.277	229	229	0.159207	-	1	50.9362	226	226	reps	0.347613	0.380949	0.197952	0.0894188
Chr11	65719809	65720044	RNASEH2C/ENSG00000172922.11/known-exon+anti-near	0	-	10	1.76877e-08	1	1.76877e-08	0.0549855	-	1	43.8132	683	683	0.0142639	NonUniformIntronCover	1	23.3407	1605	1604	reps	0.0302263	0.0995406	0.0152189	0.0140399
Chr12	6548545	6548667	IFFO1/ENSG00000010295.19/anti-near	0	-	10	1.80072e-08	1	1.80072e-08	0.213472	-	1	53.7391	197	197	0.0425771	-	1	10.7174	239	239	reps	0.174533	0.310663	0.0371686	0.0546241
ChrX	154367738	154367841	FLNA/ENSG00000196924.18/clean	0	-	10	1.81484e-08	1	1.81484e-08	0.0284211	-	1	29.0769	992	992	0.00488665	NonUniformIntronCover	1	12.1538	2475	2475	reps	0.0155757	0.0413845	0.00621674	0.00299581
Chr14	105466578	105466706	MTA1/ENSG00000182979.18/anti-near	0	+	10	1.99611e-08	1.99611e-08	1	0.0123998	NonUniformIntronCover	1	11.3125	901	893	0.0613702	-	1	45.8333	701	647	reps	0.0152157	0.00819672	0.0917862	0.0373461
Chr19	38840376	38840487	HNRNPL/ENSG00000104824.17/known-exon	0	-	10	2.06611e-08	2.06611e-08	1	0.086907	-	1	225.098	2361	2361	0.137936	-	1	351.854	2199	2199	reps	0.0951948	0.0771704	0.135701	0.146797
Chr8	144264616	144264713	BOP1/ENSG00000261236.8/anti-near	0	-	10	2.11476e-08	1	2.11476e-08	0.138881	-	1	100.8	625	605	0.0473392	NonUniformIntronCover	1	28.7714	579	578	reps	0.130281	0.150646	0.041761	0.0595364
Chr11	47744163	47746055	FNBP4/ENSG00000109920.13/clean	0	-	10	2.66012e-08	1	2.66012e-08	0.0455167	NonUniformIntronCover	0.868225	19.5995	390	388	0.000884799	-	0.494155	0.485411	540	540	reps	0.0327769	0.0508466	0.000698008	0.00183352
Chr9	133100382	133101519	AL162417.1/ENSG00000285245.1/clean	0	-	10	2.70752e-08	1	2.70752e-08	0.180007	-	1	99.663	454	423	0.0722474	-	1	48.2816	620	598	reps	0.134968	0.221547	0.0715798	0.0776819
Chr11	67608478	67608551	NDUFV1/ENSG00000167792.13/anti-near	0	+	10	2.89192e-08	2.89192e-08	1	0.0684619	-	1	154.704	2102	2102	0.118775	-	1	248.407	1843	1841	reps	0.078746	0.0537691	0.117059	0.12
Chr16	672384	672488	RHOT2/ENSG00000140983.14/clean	0	+	10	3.361e-08	1	3.361e-08	0.211232	-	1	197.368	737	690	0.115128	-	1	127.895	983	946	reps	0.169802	0.269994	0.145653	0.0800491
Chr19	1088720	1089471	POLR2E/ENSG00000099817.12/anti-near	0	-	10	3.36424e-08	1	3.36424e-08	0.0253997	-	1	61.8182	2294	2293	0.00699088	NonUniformIntronCover	1	19.8249	2802	2802	reps	0.0195239	0.0357423	0.00734883	0.00672216
Chr1	11998878	11998987	MFN2/ENSG00000116688.17/clean	0	+	10	3.96203e-08	1	3.96203e-08	0.155517	-	1	63.9024	347	344	0.0559967	-	1	46.2683	780	776	reps	0.151427	0.160747	0.0815049	0.0334634
Chr11	72021291	72022338	NUMA1/ENSG00000137497.18/anti-near	0	-	10	4.79629e-08	1	4.79629e-08	0.089713	-	1	60.2169	609	598	0.0203805	-	1	12.0458	578	574	reps	0.0333826	0.140804	0.0198374	0.0196059
Chr16	1208221	1209031	CACNA1H/ENSG00000196557.13/clean	0	+	10	5.0336e-08	1	5.0336e-08	0.264721	-	1	56.8844	158	156	0.067741	-	1	16.1313	222	222	reps	0.218206	0.34488	0.0743642	0.0608005
Chr14	24292330	24292651	DHRS1/ENSG00000157379.14/known-exon+anti-near+anti-over	0	-	41	5.15956e-08	5.15956e-08	1	0.156932	-	1	35.5536	191	191	0.465717	-	1	65.375	75	64	reps	0.133645	0.187343	0.358254	0.53527
Chr17	46031703	46032046	KANSL1/ENSG00000120071.14/anti-near	0	-	10	5.56958e-08	1	5.56958e-08	0.264479	-	1	74.7926	208	206	0.0642913	NonUniformIntronCover	1	12.7111	185	183	reps	0.252653	0.277031	0.0779221	0.0540873
Chr17	50995533	50996564	SPAG9/ENSG00000008294.21/clean	0	-	10	5.7243e-08	1	5.7243e-08	0.135472	-	1	62.2103	397	393	0.0338475	NonUniformIntronCover	1	14.8191	423	423	reps	0.125028	0.140192	0.0255424	0.039786
Chr2	175178402	175179056	ATP5MC3/ENSG00000154518.9/clean	0	-	10	5.82213e-08	1	5.82213e-08	0.0207074	-	1	68.8488	3256	3253	0.00630804	NonUniformIntronCover	1	23.6085	3715	3715	reps	0.0124881	0.0297351	0.00495191	0.00683458
Chr17	47975653	47975868	CDK5RAP3/ENSG00000108465.15/anti-near	0	+	10	7.02626e-08	7.02626e-08	1	0.476105	-	1	356.241	386	380	0.683165	-	1	504.554	216	216	reps	0.467365	0.485907	0.646135	0.736048
Chr20	2655746	2655933	NOP56/ENSG00000101361.17/anti-near	0	+	10	8.22278e-08	8.22278e-08	1	0.0738305	-	1	194.507	2349	2330	0.12241	-	1	242.423	1664	1656	reps	0.0881641	0.0625927	0.151334	0.0889945
Chr2	24827608	24827901	ADCY3/ENSG00000138031.14/clean	0	-	10	8.39737e-08	1	8.39737e-08	0.284542	-	1	85.9043	216	209	0.108864	-	1	40.0696	328	324	reps	0.279477	0.299452	0.113811	0.0993456
ChrX	154351041	154351580	FLNA/ENSG00000196924.18/clean	0	-	84	8.43283e-08	1	8.43283e-08	0.147852	-	1	314.044	1805	1801	0.0979856	-	1	342.727	3155	3139	reps	0.119372	0.185359	0.10154	0.0948883
Chr12	121330672	121331346	ANAPC5/ENSG00000089053.13/known-exon	0	-	10	8.4582e-08	1	8.4582e-08	0.111286	-	1	95.2932	761	738	0.0464425	-	1	52.406	1076	1052	reps	0.111804	0.111007	0.0343946	0.0566259
Chr18	259730	260185	THOC1/ENSG00000079134.12/clean	0	-	10	8.66744e-08	1	8.66744e-08	0.223921	NonUniformIntronCover	1	48.1844	167	160	0.0413628	-	1	8.11173	188	187	reps	0.191446	0.262595	0.0191472	0.0564689
Chr5	179799310	179799505	MGAT4B/ENSG00000161013.17/anti-near	0	-	10	9.27946e-08	1	9.27946e-08	0.0774889	-	1	51.8267	567	567	0.0189246	NonUniformIntronCover	1	14.12	679	679	reps	0.0623474	0.0966191	0.0250028	0.0145569
Chr6	32186474	32186603	PBX2/ENSG00000204304.12/clean	0	-	10	9.29876e-08	1	9.29876e-08	0.365001	-	1	79.898	138	138	0.136285	NonUniformIntronCover	1	38.8163	246	244	reps	0.334465	0.388754	0.157449	0.106625
Chr19	38917833	38917920	AC011455.2/ENSG00000269547.1/clean	0	-	16	9.44577e-08	1	9.44577e-08	0.356414	-	1	27.6897	50	47	0.0537428	NonUniformIntronCover	1	7.72414	136	127	reps	0.353915	0.351714	0.0341696	0.078125
Chr9	128421074	128422867	CERCAM/ENSG00000167123.19/known-exon	0	+	328	1.00569e-07	1.00569e-07	1	0.058757	-	1	16.1056	255	252	0.20779	-	1	83.4089	308	296	reps	0.0657067	0.0416149	0.188362	0.239307
Chr18	36138872	36141136	ELP2/ENSG00000134759.14/clean	0	+	324	1.00968e-07	1	1.00968e-07	0.216837	MinorIsoform	1	11.3518	22	20	0.00551947	-	0.785567	1.04897	189	178	reps	0.248918	0.194638	0.00153597	0.00793651
Chr2	170954782	170956435	GORASP2/ENSG00000115806.13/clean	0	+	10	1.05477e-07	1	1.05477e-07	0.0375789	-	1	21.085	535	520	0.00274907	NonUniformIntronCover	0.953135	2.42033	878	871	reps	0.0343743	0.0380804	0.00373778	0.00205973
Chr11	65636689	65636765	PCNX3/ENSG00000197136.4/clean	0	+	10	1.06308e-07	1	1.06308e-07	0.173469	-	1	86.6786	413	413	0.0669568	-	1	38.4643	535	535	reps	0.193631	0.144217	0.0836155	0.0405811
Chr15	40185379	40185550	BUB1B/ENSG00000156970.13/clean	0	+	10	1.09907e-07	1	1.09907e-07	0.254801	-	1	82.0615	224	223	0.0967164	-	1	39.8308	370	370	reps	0.223561	0.283937	0.0620574	0.122529
Chr22	29287134	29288605	EWSR1/ENSG00000182944.17/clean	0	+	10	1.15125e-07	1	1.15125e-07	0.0513543	MinorIsoform	1	159.913	2954	2199	0.0251233	-	1	71.6427	2780	2766	reps	0.0547682	0.0482115	0.0230628	0.0278663
Chr5	459459	461959	EXOC3/ENSG00000180104.16/anti-near	0	+	10	1.16767e-07	1	1.16767e-07	0.285302	-	1	97.8022	211	210	0.118287	-	1	47.2229	332	332	reps	0.273113	0.303708	0.134776	0.102842
Chr17	42574210	42577212	PSMC3IP/ENSG00000131470.14/anti-near	0	-	172	1.1841e-07	1.1841e-07	1	0.0293622	NonUniformIntronCover	0.999293	29.1917	965	952	0.106237	-	1	37.4426	315	307	reps	0.0300938	0.0270971	0.0926674	0.119213
Chr2	215372015	215372108	FN1/ENSG00000115414.20/known-exon	0	-	10	1.22369e-07	1.22369e-07	1	0.123664	-	1	34.7143	246	194	0.310702	-	1	132.971	295	281	reps	0.13948	0.115028	0.35015	0.288824
Chr12	57099078	57099293	STAT6/ENSG00000166888.12/anti-near	0	-	10	1.22577e-07	1	1.22577e-07	0.550327	-	1	124.831	102	102	0.267384	-	1	83.5783	229	218	reps	0.536647	0.568046	0.230303	0.304739
Chr8	144515072	144515149	RECQL4/ENSG00000160957.14/anti-near	0	-	10	1.32118e-07	1	1.32118e-07	0.405194	-	1	194.148	278	274	0.215278	-	1	93	323	321	reps	0.407219	0.408519	0.183244	0.252944
Chr10	68341851	68341977	HNRNPH3/ENSG00000096746.17/anti-over	0	+	10	1.37626e-07	1	1.37626e-07	0.0829961	-	1	161.104	1777	1761	0.0416217	-	1	79.5625	1832	1832	reps	0.0791794	0.0864771	0.0403616	0.0439764
Chr19	1578158	1578334	MBD3/ENSG00000071655.18/known-exon	0	-	10	1.43762e-07	1	1.43762e-07	0.229779	-	1	135.441	454	444	0.116777	-	1	99.6912	754	731	reps	0.22894	0.230733	0.10883	0.128017
Chr17	28633401	28633548	KIAA0100/ENSG00000007202.15/anti-over	0	-	44	1.4964e-07	1	1.4964e-07	0.167145	-	1	37.9302	189	153	0.0475056	-	1	28.2791	564	558	reps	0.133356	0.220441	0.0405367	0.0543768
Chr11	86950499	86951215	PRSS23/ENSG00000150687.12/known-exon+anti-near+anti-over	0	+	10	1.5786e-07	1.5786e-07	1	0.188246	NonUniformIntronCover	1	24.8134	102	102	0.595576	-	1	63.3239	37	37	reps	0.221207	0.16239	0.571249	0.61004
Chr7	128337202	128338249	RBM28/ENSG00000106344.8/clean	0	-	10	1.7565e-07	1	1.7565e-07	0.13252	-	1	42.3157	277	271	0.021866	-	1	6.77349	303	303	reps	0.105839	0.152485	0.0175033	0.0214664
Chr22	38738754	38738872	SUN2/ENSG00000100242.15/anti-over	0	-	29	1.78058e-07	1.78058e-07	1	0.0343648	NonUniformIntronCover	1	29.3243	820	819	0.110467	-	1	48.4324	390	388	reps	0.0351964	0.0351821	0.102464	0.118624
Chr5	43298134	43298517	HMGCS1/ENSG00000112972.15/clean	0	-	10	1.79974e-07	1	1.79974e-07	0.110447	-	1	50.2848	375	375	0.0401905	-	1	58.7483	1376	1376	reps	0.0927001	0.129467	0.0243802	0.0516346
Chr6	170285423	170285568	DLL1/ENSG00000198719.9/clean	0	-	10	1.84716e-07	1.84716e-07	1	0.0859577	-	1	22.3818	238	238	0.320773	-	1	36.8364	78	78	reps	0.0579503	0.0970301	0.39123	0.26629
Chr9	124353709	124356763	PSMB7/ENSG00000136930.13/anti-near	0	-	10	1.89338e-07	1.89338e-07	1	0.0096959	NonUniformIntronCover	1	18.8571	1926	1924	0.0345353	-	1	52.6544	1472	1465	reps	0.00994925	0.00890492	0.0249572	0.048337
Chr20	3046280	3046372	MRPS26/ENSG00000125901.6/clean	0	+	10	1.89973e-07	1	1.89973e-07	0.0532959	-	1	45.2059	803	799	0.0144507	NonUniformIntronCover	1	19.9412	1360	1354	reps	0.053294	0.0536469	0.0165239	0.0114808
Chr11	67610570	67610994	NDUFV1/ENSG00000167792.13/anti-near	0	+	22	2.03721e-07	2.03721e-07	1	0.0709849	-	1	136.772	1790	1779	0.123692	-	1	202.975	1437	1435	reps	0.0720879	0.0677395	0.127385	0.121492
Chr5	74741609	74745677	GFM2/ENSG00000164347.18/clean	0	-	10	2.05168e-07	1	2.05168e-07	0.196022	-	1	33.1589	129	125	0.0463083	-	1	18.5973	383	380	reps	0.171725	0.218091	0.0477439	0.0450138
Chr12	57296551	57297327	R3HDM2/ENSG00000179912.20/clean	0	-	10	2.06257e-07	1	2.06257e-07	0.104488	NonUniformIntronCover	1	24.2695	208	178	0.0121569	-	1	4.87338	396	384	reps	0.0730802	0.14711	0.00377779	0.014533
Chr1	220019079	220019987	EPRS1/ENSG00000136628.18/clean	0	-	10	2.11586e-07	1	2.11586e-07	0.044332	-	1	30.2917	653	637	0.00419406	NonUniformIntronCover	0.937639	2.98611	709	709	reps	0.0456544	0.0410118	0.00327869	0.00521953
Chr9	136722028	136722124	DIPK1B/ENSG00000165716.11/known-exon+anti-near+anti-over	0	+	10	2.18731e-07	1	2.18731e-07	0.127064	-	1	77.5833	533	508	0.0563681	-	1	76.2222	1276	1257	reps	0.104177	0.180932	0.0524911	0.0610138
Chr17	41811284	41811453	P3H4/ENSG00000141696.13/clean	0	-	10	2.1942e-07	1	2.1942e-07	0.433783	-	1	101.892	127	126	0.213899	-	1	105.031	386	380	reps	0.389014	0.528154	0.265176	0.163108
Chr10	102731783	102732151	SFXN2/ENSG00000156398.13/clean	0	+	10	2.47026e-07	1	2.47026e-07	0.206518	-	1	36.4375	132	132	0.0524979	-	1	20.6667	370	369	reps	0.142758	0.338876	0.0471706	0.0590871
Chr2	54973867	54974694	RTN4/ENSG00000115310.18/anti-near	0	-	10	2.56088e-07	1	2.56088e-07	0.0751602	-	1	38.6024	475	473	0.0248539	-	1	49.6239	1929	1924	reps	0.0797257	0.073478	0.0227474	0.0267857
Chr11	129882631	129883121	NFRKB/ENSG00000170322.14/clean	0	-	10	2.70477e-07	1	2.70477e-07	0.20007	-	1	47.7708	187	185	0.0430677	NonUniformIntronCover	1	9.40625	208	206	reps	0.178395	0.220579	0.0530005	0.0331301
Chr17	28615798	28616095	KIAA0100/ENSG00000007202.15/anti-over	0	-	10	2.74755e-07	1	2.74755e-07	0.0716529	-	1	26.7826	335	335	0.010092	-	1	5.91304	574	574	reps	0.0587116	0.0886856	0.0115714	0.00847679
Chr1	202966898	202967190	CYB5R1/ENSG00000159348.13/clean	0	-	10	2.81795e-07	2.81795e-07	1	0.0470047	-	1	14.2544	288	288	0.188213	NonUniformIntronCover	1	43.5877	188	188	reps	0.0676908	0.024103	0.187574	0.18885
Chr12	122981879	122981956	ARL6IP4/ENSG00000182196.13/anti-near	0	+	10	2.87204e-07	1	2.87204e-07	0.0454349	-	1	81.6296	1713	1713	0.0176274	-	1	37	2062	2062	reps	0.0378304	0.0592387	0.0150582	0.0227635
Chr16	666598	666672	WDR90/ENSG00000161996.19/clean	0	+	10	3.04772e-07	1	3.04772e-07	0.384284	-	1	123.577	198	189	0.185013	-	1	67.4231	293	285	reps	0.33119	0.489788	0.203948	0.152416
Chr19	1011663	1011740	TMEM259/ENSG00000182087.14/anti-near	0	-	10	3.06181e-07	3.06181e-07	1	0.13718	-	1	203.667	1061	1060	0.217683	MinorIsoform	1	270.185	653	653	reps	0.147881	0.119584	0.22939	0.205578
Chr6	35469529	35470178	RPL10A/ENSG00000198755.11/anti-near	0	+	10	3.27396e-07	1	3.27396e-07	0.0381251	-	1	491.529	12400	12397	0.0268668	NonUniformIntronCover	1	327.354	11857	11854	reps	0.0343349	0.0424709	0.0321635	0.0203177
Chr17	32368014	32369294	ZNF207/ENSG00000010244.18/clean	0	+	10	3.32275e-07	1	3.32275e-07	0.0497948	-	1	47.0591	892	891	0.0143788	-	1	21.7224	1489	1481	reps	0.0580759	0.0461419	0.0113011	0.0155781
Chr12	57749317	57749453	CDK4/ENSG00000135446.17/known-exon+anti-near+anti-over	0	-	10	3.44522e-07	1	3.44522e-07	0.0225199	-	1	72.0192	2860	2859	0.00843876	-	1	34.4423	3996	3996	reps	0.0179493	0.0276052	0.00745773	0.00961437
ChrX	111709048	111711674	ALG13/ENSG00000101901.12/anti-over	0	+	126	3.47167e-07	1	3.47167e-07	0.599019	-	1	25.396	17	15	0.10964	NonUniformIntronCover	1	10.467	78	76	reps	0.539642	0.645767	0.137652	0.0814913
Chr9	34637089	34637219	SIGMAR1/ENSG00000147955.17/known-exon+anti-near	0	-	10	3.50551e-07	1	3.50551e-07	0.0707953	-	1	103.312	1312	1288	0.0309881	NonUniformIntronCover	1	52.5417	1584	1561	reps	0.0623109	0.0822995	0.0301853	0.0326117
Chr10	101532432	101532951	BTRC/ENSG00000166167.18/clean	0	+	10	3.54767e-07	1	3.54767e-07	0.0888401	NonUniformIntronCover	1	16.1854	166	162	0.000572047	-	0.145383	0	254	252	reps	0.0520386	0.114612	0	0.000891126
Chr9	136792358	136792818	TMEM141/ENSG00000244187.8/clean	0	+	10	4.08788e-07	1	4.08788e-07	0.0247185	-	1	27.55	1087	1020	0.00443749	NonUniformIntronCover	0.944444	8.88333	1993	1992	reps	0.0216214	0.0365118	0.00227742	0.00760863
Chr1	156743455	156743651	HDGF/ENSG00000143321.19/known-exon	0	-	10	4.13481e-07	1	4.13481e-07	0.0269512	-	1	141.618	5102	5102	0.0126791	-	1	52.4079	4073	4073	reps	0.0219769	0.0322512	0.00855509	0.0183356
Chr10	93692729	93694860	FRA10AC1/ENSG00000148690.12/clean	0	-	10	4.15719e-07	1	4.15719e-07	0.0700756	-	0.993399	40.1649	484	484	0.00907559	NonUniformIntronCover	0.838755	4.00236	437	437	reps	0.0529605	0.0881531	0.00190615	0.0194297
Chr17	75130642	75130752	NT5C/ENSG00000125458.7/known-exon+anti-near	0	-	10	4.39856e-07	1	4.39856e-07	0.27014	-	1	102.525	277	227	0.125031	-	1	62.875	440	404	reps	0.271709	0.263851	0.128023	0.118101
Chr15	66523748	66527289	ZWILCH/ENSG00000174442.12/anti-over	0	+	98	4.54228e-07	1	4.54228e-07	0.167262	-	1	24.5047	122	117	0.019966	-	0.926808	4.1153	202	200	reps	0.126908	0.212183	0.0216198	0.0115385
Chr16	657892	658182	WDR90/ENSG00000161996.19/clean	0	+	10	4.79778e-07	1	4.79778e-07	0.23938	-	1	44.375	133	129	0.0637526	NonUniformIntronCover	1	16.9554	249	247	reps	0.222571	0.273906	0.0750547	0.0443114
Chr9	136405202	136405904	ENTR1/ENSG00000165689.17/clean	0	-	156	4.88657e-07	1	4.88657e-07	0.316025	-	1	229.173	496	467	0.202483	-	1	265.064	1044	1025	reps	0.292679	0.347324	0.169801	0.247314
Chr5	177093331	177093405	FGFR4/ENSG00000160867.15/known-exon	0	+	10	4.93095e-07	1	4.93095e-07	0.707154	NonUniformIntronCover	1	89.3462	34	34	0.245585	-	1	22.4615	69	67	reps	0.747006	0.676349	0.329181	0.170654
Chr11	70420510	70421469	CTTN/ENSG00000085733.16/clean	0	+	10	5.47055e-07	0.999999	5.47055e-07	0.0807417	MinorIsoform	1	152.567	1737	826	0.0387378	-	1	55.5722	1379	1183	reps	0.0597677	0.10755	0.035139	0.0466304
Chr12	8092784	8092871	NECAP1/ENSG00000089818.18/clean	0	+	10	5.54863e-07	0.999999	5.54863e-07	0.274701	-	1	52.6452	134	134	0.0744717	-	1	14.3226	178	178	reps	0.220808	0.335239	0.0874793	0.0693042
Chr21	44773687	44777298	UBE2G2/ENSG00000184787.19/clean	0	-	355	5.56186e-07	5.56186e-07	0.999999	0.0593565	-	1	36.9778	585	582	0.147241	-	1	88.5767	510	507	reps	0.0461027	0.0725531	0.117454	0.172688
Chr19	13765109	13765953	MRI1/ENSG00000037757.14/clean	0	+	10	5.58651e-07	0.999999	5.58651e-07	0.361425	-	1	57.1647	101	84	0.141115	-	1	50.4401	307	295	reps	0.293	0.614586	0.144043	0.14628
Chr12	8091850	8092675	NECAP1/ENSG00000089818.18/clean	0	+	10	5.692e-07	0.999999	5.692e-07	0.302416	-	1	59.8257	118	118	0.105092	NonUniformIntronCover	1	29.0061	240	239	reps	0.229024	0.371571	0.0950112	0.120502
Chr1	225922383	225923700	AL117348.2/ENSG00000255835.1/clean	0	-	10	5.81266e-07	5.81266e-07	0.999999	0.0626815	-	1	79.1778	1140	1127	0.120771	-	1	151.92	1088	1078	reps	0.0517815	0.0752918	0.0999971	0.14673
Chr4	103085462	103086479	BDH2/ENSG00000164039.15/clean	0	-	153	6.10657e-07	0.999999	6.10657e-07	0.202147	-	1	56.5	223	207	0.0659747	-	1	24.5809	333	330	reps	0.243152	0.16486	0.0588853	0.0684585
Chr8	123348273	123349284	ATAD2/ENSG00000156802.13/clean	0	-	10	6.13067e-07	0.999999	6.13067e-07	0.0644071	-	1	29.1197	404	404	0.00165932	NonUniformIntronCover	0.568432	0.713217	341	341	reps	0.0517138	0.0754358	0.00385199	0.000982665
Chr11	810039	810233	RPLP2/ENSG00000177600.9/known-exon+anti-near	0	+	19	6.25397e-07	0.999999	6.25397e-07	0.0121639	NonUniformIntronCover	1	208.028	16894	16192	0.0069623	-	1	109.394	15603	14969	reps	0.0115328	0.0130402	0.00924082	0.00376434
Chr9	137614475	137614558	ARRDC1/ENSG00000197070.14/anti-near	0	+	10	6.49773e-07	0.999999	6.49773e-07	0.0982559	-	1	53.0645	487	487	0.0235329	NonUniformIntronCover	1	10.3871	431	430	reps	0.0527929	0.196016	0.0201358	0.0246238
Chr11	43330058	43330507	API5/ENSG00000166181.13/anti-over	0	+	10	6.72975e-07	0.999999	6.72975e-07	0.0964507	-	1	45.3672	425	424	0.0323009	NonUniformIntronCover	1	33.4124	1001	1001	reps	0.0830021	0.104854	0.022946	0.0394765
Chr19	1271246	1271328	CIRBP/ENSG00000099622.14/known-exon+anti-near	0	+	10	6.93582e-07	6.93582e-07	0.999999	0.0311673	-	1	39.6333	1221	1221	0.0801256	-	1	68.9	791	791	reps	0.0332429	0.0284441	0.0591268	0.134012
Chr4	15687148	15688550	FAM200B/ENSG00000237765.7/known-exon	0	+	324	7.10693e-07	7.10693e-07	0.999999	0.101412	NonUniformIntronCover	1	27.0856	240	233	0.337626	-	1	38.2292	75	71	reps	0.0930605	0.104349	0.293812	0.359676
Chr19	39474718	39476080	SUPT5H/ENSG00000196235.14/clean	0	+	10	7.56582e-07	0.999999	7.56582e-07	0.104802	-	1	117.891	1007	1004	0.0396365	NonUniformIntronCover	1	25.0111	605	605	reps	0.0944295	0.110818	0.0502143	0.0302978
Chr9	136463601	136463678	SEC16A/ENSG00000148396.18/known-exon	0	-	10	7.57976e-07	0.999999	7.57976e-07	0.208268	-	1	64.1852	220	217	0.0751959	-	1	31.6296	382	380	reps	0.167942	0.262083	0.0813368	0.0704225
Chr17	82036643	82036720	DCXR/ENSG00000169738.8/anti-near	0	-	10	7.77676e-07	7.77676e-07	0.999999	0.141547	-	1	233.148	1398	1397	0.212244	-	1	334.63	1204	1204	reps	0.141373	0.144126	0.204827	0.222486
Chr22	49962865	49962939	PIM3/ENSG00000198355.5/known-exon	0	+	10	7.78503e-07	0.999999	7.78503e-07	0.145175	-	1	283.615	1670	1653	0.0836618	-	1	95.5	1046	1043	reps	0.137836	0.152282	0.102803	0.0543422
Chr22	40407071	40407200	SGSM3/ENSG00000100359.21/anti-near	0	+	10	7.83291e-07	7.83291e-07	0.999999	0.0495977	-	1	26.0408	499	499	0.141161	-	1	70.3469	428	428	reps	0.0358306	0.0694172	0.121094	0.162082
Chr17	82056391	82056469	GPS1/ENSG00000169727.12/anti-near	0	+	10	8.03981e-07	0.999999	8.03981e-07	0.117613	-	1	152.75	1146	1100	0.0625589	-	1	85.2857	1278	1274	reps	0.116631	0.119656	0.0866272	0.0390039
Chr7	100682777	100683011	GIGYF1/ENSG00000146830.10/anti-near	0	-	10	8.21071e-07	8.21071e-07	0.999999	0.286604	-	1	56.2444	127	127	0.613188	NonUniformIntronCover	1	110.967	65	65	reps	0.325121	0.244423	0.599127	0.650378
Chr7	2366448	2366524	EIF3B/ENSG00000106263.18/clean	0	+	10	8.26089e-07	0.999999	8.26089e-07	0.054443	-	1	51.0714	887	876	0.0195783	NonUniformIntronCover	1	37.1429	1860	1856	reps	0.0363763	0.0812207	0.024839	0.0125634
Chr11	65714743	65714820	KAT5/ENSG00000172977.13/anti-over	0	+	10	8.35977e-07	0.999999	8.35977e-07	0.0937931	-	1	52.8889	511	511	0.0243114	-	1	12.2593	492	492	reps	0.0996726	0.0852713	0.0394922	0.00749064
Chr11	67611569	67611896	NDUFV1/ENSG00000167792.13/anti-near	0	+	10	8.59994e-07	0.999999	8.59994e-07	0.0437077	-	1	99.8661	2185	2153	0.0191131	NonUniformIntronCover	1	44.9921	2309	2255	reps	0.0289088	0.0686477	0.0248517	0.013474
Chr6	87519707	87520179	RARS2/ENSG00000146282.18/clean	0	-	10	8.75123e-07	0.999999	8.75123e-07	0.0904645	-	1	34.0161	330	330	0.0115067	NonUniformIntronCover	0.995671	3.87634	331	331	reps	0.0592401	0.114842	0.00784967	0.0161383
Chr11	94461036	94464112	MRE11/ENSG00000020922.13/clean	0	-	390	8.91058e-07	0.999999	8.91058e-07	0.0890737	-	1	37.2556	381	367	0.0166433	NonUniformIntronCover	0.997766	7.21004	424	419	reps	0.0586795	0.126011	0.0114445	0.0208746
Chr22	20712797	20713280	PI4KA/ENSG00000241973.11/clean	0	-	140	9.07741e-07	0.999999	9.07741e-07	0.282914	-	1	88.7698	225	200	0.122024	-	1	44.4748	320	313	reps	0.249734	0.322423	0.143839	0.101504
Chr19	18437760	18437859	ISYNA1/ENSG00000105655.19/known-exon+anti-near	0	-	10	9.74224e-07	0.999999	9.74224e-07	0.119771	-	1	185.324	1079	1079	0.0700367	-	1	134.054	1424	1423	reps	0.115152	0.133012	0.0978236	0.0440745
Chr10	42820992	42822061	BMS1/ENSG00000165733.8/clean	0	+	70	9.79311e-07	0.999999	9.79311e-07	0.060747	-	1	27.8753	402	401	0.00878784	NonUniformIntronCover	1	5.06234	571	569	reps	0.0520302	0.0691033	0.00903574	0.00911589
Chr19	45064227	45064342	CLASRP/ENSG00000104859.15/clean	0	+	10	9.90548e-07	0.999999	9.90548e-07	0.59234	-	1	290.605	200	200	0.371546	-	1	151.349	256	256	reps	0.588035	0.589755	0.417256	0.274294
Chr6	75256295	75258779	TMEM30A/ENSG00000112697.17/clean	0	-	10	9.92898e-07	0.999999	9.92898e-07	0.164503	-	1	20.6737	102	102	0.0380139	NonUniformIntronCover	1	23.8677	604	604	reps	0.258886	0.130993	0.0356534	0.0385352
Chr16	11762747	11763477	ZC3H7A/ENSG00000122299.12/clean	0	-	10	1.02467e-06	0.999999	1.02467e-06	0.0951814	-	1	35.5556	322	321	0.0201328	NonUniformIntronCover	1	9.69792	467	467	reps	0.091774	0.0863448	0.0358201	0.00995611
Chr11	64906533	64906664	ATG2A/ENSG00000110046.13/clean	0	-	10	1.03711e-06	0.999999	1.03711e-06	0.0838721	-	1	19.5918	214	211	0.00121724	NonUniformIntronCover	0.264463	0	217	212	reps	0.0790037	0.0881877	0.00225527	0.000801732
Chr2	61188709	61188909	USP34/ENSG00000115464.15/known-exon+anti-near+anti-over	0	-	42	1.04562e-06	1.04562e-06	0.999999	0.0574508	-	1	25.2344	405	405	0.162667	-	1	66.8281	338	338	reps	0.0734759	0.0447098	0.112969	0.208336
Chr10	68431971	68432205	DNA2/ENSG00000138346.15/clean	0	-	10	1.04574e-06	0.999999	1.04574e-06	0.171231	-	1	39.2556	187	187	0.0315217	NonUniformIntronCover	1	6.44444	195	195	reps	0.107785	0.231665	0.00859151	0.0405904
Chr16	672566	672702	RHOT2/ENSG00000140983.14/clean	0	+	10	1.07112e-06	0.999999	1.07112e-06	0.311516	-	1	287.769	627	621	0.20573	-	1	237.519	903	902	reps	0.281405	0.361131	0.237578	0.173948
Chr17	63825163	63825241	FTSJ3/ENSG00000108592.17/clean	0	-	10	1.14409e-06	0.999999	1.14409e-06	0.0983141	-	1	18.5357	167	167	0.0155642	NonUniformIntronCover	1	8	497	497	reps	0.125	0.0746861	0.0173426	0.012884
Chr5	1324813	1325750	CLPTM1L/ENSG00000049656.14/clean	0	-	10	1.1531e-06	0.999999	1.1531e-06	0.101391	-	1	74.3558	649	648	0.0449564	-	1	61.3827	1294	1294	reps	0.0914068	0.111887	0.0498384	0.0428015
Chr17	54962915	54963305	COX11/ENSG00000166260.13/known-exon+anti-near	0	-	10	1.22061e-06	0.999999	1.22061e-06	0.198723	MinorIsoform	1	70.4342	188	188	0.0808461	-	1	43.8026	434	434	reps	0.231368	0.172974	0.0757929	0.0744645
Chr20	17968457	17968699	SNX5/ENSG00000089006.16/known-exon+anti-near	0	-	64	1.22698e-06	0.999999	1.22698e-06	0.634174	MinorIsoform	1	355.375	147	147	0.430079	-	1	246.764	264	264	reps	0.524921	0.725353	0.457869	0.396539
Chr11	43323636	43326506	API5/ENSG00000166181.13/anti-near	0	+	10	1.2299e-06	0.999999	1.2299e-06	0.0671403	NonUniformIntronCover	1	36.3462	505	482	0.0191058	-	1	21.9712	1128	1104	reps	0.0622383	0.0728034	0.0238039	0.0151493
Chr14	67648183	67650714	ARG2/ENSG00000081181.8/known-exon+anti-near+anti-over	0	+	10	1.24168e-06	1.24168e-06	0.999999	0.15378	NonUniformIntronCover	1	63.4222	349	343	0.330851	-	1	87.0208	176	171	reps	0.180765	0.128981	0.276583	0.382429
Chr19	2233905	2233997	PLEKHJ1/ENSG00000104886.12/known-exon+anti-near	0	-	10	1.24499e-06	0.999999	1.24499e-06	0.224728	-	1	156.529	490	490	0.127775	-	1	121.735	809	806	reps	0.209529	0.266699	0.117497	0.151599
Chr4	41257009	41257114	UCHL1/ENSG00000154277.13/anti-near	0	+	21	1.32071e-06	1.32071e-06	0.999999	0.0140939	-	1	71.1765	4979	4816	0.0282729	-	1	116.353	3999	3858	reps	0.0167215	0.0113131	0.0277981	0.0281721
Chr16	725880	725965	CCDC78/ENSG00000162004.17/anti-near	0	-	10	1.34914e-06	0.999999	1.34914e-06	1	LowSplicing	1	13.3226	0	0	0.0606061	-	1	2	31	31	reps	1	1	0.0833333	0.047619
Chr1	11020599	11022123	TARDBP/ENSG00000120948.18/anti-near	0	+	10	1.42355e-06	0.999999	1.42355e-06	0.0269978	-	1	38.3185	1367	1365	0.00600216	NonUniformIntronCover	0.97358	10.6155	1748	1746	reps	0.0220182	0.0323872	0.0058214	0.00622922
Chr3	50104308	50105076	RBM5/ENSG00000003756.17/clean	0	+	10	1.43578e-06	0.999999	1.43578e-06	0.307807	MinorIsoform	1	87.1579	68	68	0.139171	-	1	55.7763	284	284	reps	0.275812	0.317628	0.14343	0.136397
Chr13	25253964	25254384	MTMR6/ENSG00000139505.11/clean	0	-	10	1.46485e-06	0.999999	1.46485e-06	0.337444	MinorIsoform	1	9.67683	19	14	0.0202558	-	0.939024	2.64634	128	126	reps	0.208685	0.442718	0.00726392	0.0337731
Chr19	804438	804531	PTBP1/ENSG00000011304.20/known-exon	0	+	10	1.47188e-06	0.999999	1.47188e-06	0.0282228	-	1	51.0857	1759	1756	0.00923229	-	1	22.4571	2410	2407	reps	0.0310836	0.0262684	0.00621325	0.0130435
Chr17	62424012	62424218	METTL2A/ENSG00000087995.16/clean	0	+	13	1.48366e-06	1.48366e-06	0.999999	0.338865	-	1	119.937	234	230	0.596959	-	1	154.038	104	98	reps	0.350569	0.320119	0.533864	0.677438
Chr11	72229558	72229662	INPPL1/ENSG00000165458.14/clean	0	+	10	1.64052e-06	0.999998	1.64052e-06	0.196759	-	1	88.1842	360	281	0.0910667	-	1	60.8158	607	578	reps	0.179879	0.225087	0.100681	0.0806692
Chr4	2250701	2251083	MXD4/ENSG00000123933.17/clean	0	-	10	1.68609e-06	0.999998	1.68609e-06	0.0740047	-	1	46.1133	577	500	0.0231082	NonUniformIntronCover	1	22.5667	954	946	reps	0.0661912	0.0917104	0.0247229	0.021252
Chr17	63821643	63821722	FTSJ3/ENSG00000108592.17/anti-near	0	-	10	1.79426e-06	0.999998	1.79426e-06	0.0636562	-	1	19.1034	281	279	0.00828169	-	1	5.06897	607	607	reps	0.0581867	0.0736768	0.014424	0.000935917
Chr15	70671091	70671964	UACA/ENSG00000137831.15/clean	0	-	10	1.80016e-06	0.999998	1.80016e-06	0.152323	-	1	23.3602	130	129	0.0199829	-	1	4.32277	212	212	reps	0.0843996	0.204096	0.0169972	0.0187022
Chr17	82050006	82050401	RFNG/ENSG00000169733.12/anti-near	0	-	10	1.90825e-06	1.90825e-06	0.999998	0.162902	-	1	84.4581	431	431	0.312965	-	1	112.516	247	245	reps	0.173162	0.147074	0.333291	0.288846
ChrX	134891640	134896816	MOSPD1/ENSG00000101928.13/clean	0	-	13	1.92301e-06	0.999998	1.92301e-06	0.117669	-	1	36.4078	246	207	0.034588	MinorIsoform	1	22.8936	464	424	reps	0.0946573	0.129222	0.0363914	0.0309756
Chr17	64500326	64500548	DDX5/ENSG00000108654.15/clean	0	-	10	1.92464e-06	1.92464e-06	0.999998	0.162248	-	1	874.616	4516	4433	0.201023	-	1	998.349	3968	3903	reps	0.173018	0.150552	0.180362	0.224724
Chr6	159787871	159788057	TCP1/ENSG00000120438.12/clean	0	-	41	1.93973e-06	1.93973e-06	0.999998	0.0130275	-	1	53.4576	4050	4001	0.0279782	-	1	97.2881	3380	3318	reps	0.0166375	0.0102551	0.0293272	0.0268131
Chr12	6975378	6975695	EMG1/ENSG00000126749.16/anti-near	0	+	10	1.94336e-06	0.999998	1.94336e-06	0.0759107	-	1	45.0163	519	511	0.0222805	NonUniformIntronCover	1	18.5041	812	794	reps	0.0655037	0.091564	0.0146108	0.0312762
Chr11	65634641	65634972	PCNX3/ENSG00000197136.4/clean	0	+	10	1.96099e-06	0.999998	1.96099e-06	0.241277	MinorIsoform	1	70.9147	108	108	0.0984903	-	1	37.4729	325	325	reps	0.217648	0.290288	0.103722	0.0915058
Chr9	137064979	137065077	SAPCD2/ENSG00000186193.9/anti-near	0	-	10	1.96784e-06	0.999998	1.96784e-06	0.142447	-	1	41.3611	236	236	0.0455472	NonUniformIntronCover	1	26.0556	533	530	reps	0.125127	0.176504	0.0572529	0.0272461
Chr3	183736829	183747671	YEATS2/ENSG00000163872.16/clean	0	+	1730	1.98791e-06	0.999998	1.98791e-06	0.149992	MinorIsoform	0.992428	10.9405	34	31	0.0031823	-	0.462906	0.407296	139	138	reps	0.14084	0.147474	0.00502471	0.0029232
Chr19	9818617	9818727	FBXL12/ENSG00000127452.9/known-exon	0	-	10	2.01835e-06	0.999998	2.01835e-06	0.265564	MinorIsoform	1	69.425	192	103	0.0922779	-	1	21.45	211	164	reps	0.302849	0.223986	0.0947449	0.0875644
Chr3	49909400	49910118	MON1A/ENSG00000164077.14/anti-over	0	-	10	2.11521e-06	0.999998	2.11521e-06	0.398707	-	1	62.993	95	89	0.129759	-	1	18.9366	127	124	reps	0.42197	0.374164	0.139096	0.108492
Chr16	574763	575838	PIGQ/ENSG00000007541.17/clean	0	+	10	2.18011e-06	0.999998	2.18011e-06	0.126274	-	1	56.6534	392	388	0.0412366	NonUniformIntronCover	1	20.6019	479	477	reps	0.10651	0.16496	0.0342865	0.0540516
Chr10	94574187	94574553	HELLS/ENSG00000119969.15/clean	0	+	10	2.18683e-06	0.999998	2.18683e-06	0.145856	-	1	70.3542	412	408	0.0519735	-	1	23.9028	428	428	reps	0.0906175	0.18159	0.0408526	0.0548801
Chr5	43297166	43298008	HMGCS1/ENSG00000112972.15/clean	0	-	10	2.20097e-06	0.999998	2.20097e-06	0.117359	-	1	42.8144	322	253	0.0443425	-	1	48.2096	1039	993	reps	0.0781136	0.149038	0.0245542	0.0719673
Chr5	80440032	80443122	ZFYVE16/ENSG00000039319.17/anti-over	0	+	97	2.23671e-06	0.999998	2.23671e-06	0.3312	NonUniformIntronCover	1	54.4737	110	101	0.097394	-	1	15.2143	141	132	reps	0.219497	0.408752	0.0672816	0.107816
Chr17	7222302	7222666	ACADVL/ENSG00000072778.20/anti-near	0	+	10	2.24334e-06	2.24334e-06	0.999998	0.166381	-	1	137.317	688	686	0.289567	-	1	136.951	336	331	reps	0.135452	0.189698	0.284914	0.294055
Chr16	1961291	1961496	NDUFB10/ENSG00000140990.15/anti-near	0	+	10	2.27997e-06	0.999998	2.27997e-06	0.0377644	-	1	115.62	2888	2880	0.0199952	-	1	90.9367	4345	4334	reps	0.0305551	0.0483987	0.0182326	0.022472
Chr5	1318453	1320615	CLPTM1L/ENSG00000049656.14/clean	0	-	10	2.30258e-06	0.999998	2.30258e-06	0.110945	-	1	94.0916	748	743	0.0550864	-	1	76.3701	1310	1303	reps	0.110934	0.107435	0.0589699	0.0482645
Chr16	31112027	31112120	BCKDK/ENSG00000103507.14/known-exon	0	+	10	2.34681e-06	0.999998	2.34681e-06	0.768303	-	1	334.914	101	94	0.543625	-	1	370.457	311	287	reps	0.767487	0.772279	0.544971	0.537874
Chr11	69653319	69654157	LTO1/ENSG00000149716.13/known-exon+anti-near+anti-over	0	-	10	2.38213e-06	2.38213e-06	0.999998	0.710621	-	1	294.681	99	99	0.970265	MinorIsoform	1	717.877	16	16	reps	0.737487	0.678003	0.969003	0.972066
Chr11	65634356	65634537	PCNX3/ENSG00000197136.4/clean	0	+	10	2.43981e-06	0.999998	2.43981e-06	0.260528	MinorIsoform	1	75.0435	213	104	0.114886	-	1	50.2319	387	371	reps	0.25414	0.269949	0.135964	0.0905415
Chr8	144318566	144318698	DGAT1/ENSG00000185000.12/anti-near	0	-	10	2.45493e-06	2.45493e-06	0.999998	0.0274725	NonUniformIntronCover	1	10	352	352	0.125615	-	1	32.18	224	224	reps	0.0256591	0.0291971	0.182071	0.0780669
Chr11	62723726	62723913	HNRNPUL2/ENSG00000214753.4/clean	0	-	10	2.46795e-06	0.999998	2.46795e-06	0.0325364	-	1	45.0986	1341	1193	0.0077216	NonUniformIntronCover	1	9.33803	1200	1199	reps	0.0258106	0.0422837	0.00691869	0.00824871
Chr1	1669736	1670097	SLC35E2B/ENSG00000189339.12/clean	0	-	10	2.48371e-06	0.999998	2.48371e-06	0.36878	-	1	80.6241	138	130	0.168398	-	1	54.2695	268	263	reps	0.338097	0.404068	0.148633	0.187056
Chr16	2770465	2770603	SRRM2/ENSG00000167978.17/anti-near	0	+	10	2.49268e-06	2.49268e-06	0.999998	0.0116549	-	1	50.7308	4302	3999	0.0255811	-	1	87.5	3333	3097	reps	0.0119719	0.0119249	0.0221777	0.0288655
ChrX	111708393	111708964	ALG13/ENSG00000101901.12/anti-over	0	+	10	2.53336e-06	0.999997	2.53336e-06	0.569496	-	1	18.52	11	11	0.086882	NonUniformIntronCover	1	6.75556	56	55	reps	0.467613	0.659607	0.160613	0.0487031
Chr12	69262562	69269511	CPSF6/ENSG00000111605.18/clean	0	+	10	2.71112e-06	2.71112e-06	0.999997	0.0687488	NonUniformIntronCover	1	69.0994	936	911	0.133215	-	1	128.945	839	815	reps	0.0536486	0.0838208	0.09594	0.167403
Chr21	32755353	32759079	PAXBP1/ENSG00000159086.15/clean	0	-	47	2.79617e-06	0.999997	2.79617e-06	0.460223	NonUniformIntronCover	1	116.809	137	129	0.242121	-	1	84.021	261	260	reps	0.38232	0.510079	0.220323	0.261574
Chr16	2240145	2243045	ECI1/ENSG00000167969.13/anti-over	0	-	818	2.84511e-06	2.84511e-06	0.999997	0.0377446	NonUniformIntronCover	1	91.5516	2334	2052	0.0720201	-	1	111.447	1436	1372	reps	0.0386691	0.0361005	0.0783959	0.0628079
Chr19	18435676	18435756	ISYNA1/ENSG00000105655.19/anti-near	0	-	10	2.89693e-06	0.999997	2.89693e-06	0.106561	-	1	223.036	1868	1867	0.0680662	-	1	189.679	2588	2587	reps	0.107004	0.107117	0.081269	0.0585975
Chr17	3655101	3655220	CTNS/ENSG00000040531.16/anti-near	0	+	10	2.93129e-06	0.999997	2.93129e-06	0.284176	-	1	38.1111	96	96	0.0670655	-	1	10.7111	146	146	reps	0.322209	0.238149	0.0604239	0.076866
Chr1	156591986	156592100	NAXE/ENSG00000163382.12/anti-near	0	+	10	2.93468e-06	0.999997	2.93468e-06	0.0230229	-	1	36.7857	1561	1499	0.00595504	NonUniformIntronCover	1	13.0238	2174	2114	reps	0.0171313	0.0347838	0.0100949	0.00188192
Chr9	35074494	35074926	FANCG/ENSG00000221829.10/clean	0	-	10	2.96021e-06	0.999997	2.96021e-06	0.404055	-	1	90.8529	107	105	0.177302	-	1	41.5941	166	165	reps	0.395411	0.41681	0.186418	0.173063
Chr11	46656273	46657094	ATG13/ENSG00000175224.16/clean	0	+	10	3.03387e-06	0.999997	3.03387e-06	0.109342	-	1	47.2646	368	367	0.0324457	NonUniformIntronCover	1	17.5046	518	516	reps	0.0854366	0.120128	0.0183434	0.0489676
Chr6	44307394	44310298	AARS2/ENSG00000124608.5/anti-over	0	-	258	3.07527e-06	0.999997	3.07527e-06	0.454944	-	1	37.5604	45	35	0.153683	-	1	31.7783	166	163	reps	0.384621	0.527708	0.119588	0.181907
Chr11	72231189	72231497	INPPL1/ENSG00000165458.14/clean	0	+	10	3.16488e-06	0.999997	3.16488e-06	0.134407	NonUniformIntronCover	1	69.875	449	448	0.0592749	-	1	53.5583	850	839	reps	0.0970676	0.22254	0.0535082	0.0663138
Chr6	132471600	132472281	STX7/ENSG00000079950.14/clean	0	-	10	3.3953e-06	0.999997	3.3953e-06	0.115652	-	1	71.6654	548	548	0.0421496	NonUniformIntronCover	1	22.9703	522	521	reps	0.0994309	0.129489	0.0316201	0.0523582
Chr11	47415159	47415287	SLC39A13/ENSG00000165915.14/known-exon+anti-near	0	+	10	3.39725e-06	3.39725e-06	0.999997	0.148916	-	1	53.5417	306	304	0.306561	NonUniformIntronCover	1	122.458	277	275	reps	0.160364	0.136597	0.297651	0.315771
Chr11	65133074	65133159	SYVN1/ENSG00000162298.18/clean	0	-	10	3.41528e-06	3.41528e-06	0.999997	0.00964187	NonUniformIntronCover	1	7	718	718	0.0570133	-	1	20.6774	342	342	reps	0.00314465	0.0137702	0.0486074	0.0646313
Chr22	50198186	50198344	TRABD/ENSG00000170638.9/anti-near	0	+	10	3.5007e-06	3.5007e-06	0.999996	0.0298055	-	1	27.8333	906	840	0.0776792	-	1	74.2833	882	848	reps	0.0253086	0.0386248	0.0821549	0.0715006
ChrX	136874452	136875085	RBMX/ENSG00000147274.14/known-exon	0	-	10	3.5431e-06	0.999996	3.5431e-06	0.0811797	-	1	127.227	1251	1251	0.0468789	NonUniformIntronCover	1	148.98	2833	2833	reps	0.0780801	0.0855907	0.0434209	0.0492673
Chr9	136835845	136837345	RABL6/ENSG00000196642.19/clean	0	+	10	3.58171e-06	0.999996	3.58171e-06	0.098325	-	1	192.359	1764	1753	0.0604537	-	1	152.044	2351	2346	reps	0.0963609	0.096551	0.0616733	0.058171
Chr4	673966	674211	ATP5ME/ENSG00000169020.10/known-exon+anti-near+anti-over	0	-	21	3.65685e-06	0.999996	3.65685e-06	0.0674193	-	1	56.5333	761	761	0.0255669	-	1	30.8556	1139	1139	reps	0.0649719	0.0717476	0.030329	0.0214742
Chr14	94096965	94100738	IFI27L1/ENSG00000165948.11/clean	0	+	207	3.77164e-06	3.77164e-06	0.999996	0.0851505	-	1	27.6436	297	246	0.245809	MinorIsoform	1	47.2591	145	106	reps	0.065445	0.119474	0.198943	0.314965
Chr11	67283949	67284210	GRK2/ENSG00000173020.11/clean	0	+	10	3.89297e-06	0.999996	3.89297e-06	0.125459	-	1	92.9604	648	614	0.0565875	-	1	42.2871	705	689	reps	0.123775	0.126348	0.0711704	0.0416808
Chr5	1330383	1331798	CLPTM1L/ENSG00000049656.14/clean	0	-	10	3.94113e-06	0.999996	3.94113e-06	0.0864611	-	1	50.54	499	495	0.0349523	-	1	43.4618	1190	1179	reps	0.0854541	0.0886745	0.0415361	0.0272289
Chr17	82036448	82036543	DCXR/ENSG00000169738.8/anti-near	0	-	10	4.09845e-06	4.09845e-06	0.999996	0.157849	-	1	199.057	1031	1027	0.235424	-	1	316.229	1012	985	reps	0.156336	0.161926	0.250331	0.218617
Chr17	82050555	82050661	RFNG/ENSG00000169733.12/anti-near	0	-	10	4.28637e-06	4.28637e-06	0.999996	0.141422	-	1	66.875	406	405	0.286542	-	1	92.775	231	231	reps	0.158142	0.114033	0.266055	0.311382
Chr16	683598	683684	JMJD8/ENSG00000161999.13/anti-near	0	-	12	4.43038e-06	0.999996	4.43038e-06	0.108015	-	1	144.467	1189	1189	0.055418	-	1	58.2	991	991	reps	0.0870719	0.145377	0.058332	0.0496996
Chr7	56078186	56078363	SUMF2/ENSG00000129103.18/anti-near	0	+	10	4.43332e-06	0.999996	4.43332e-06	0.184096	-	1	74.9104	332	304	0.0817763	NonUniformIntronCover	1	48.5373	545	521	reps	0.172387	0.202013	0.087676	0.0810883
Chr22	36758409	36762903	IFT27/ENSG00000100360.15/clean	0	-	377	4.59925e-06	0.999995	4.59925e-06	0.392324	-	1	110.4	171	132	0.194537	NonUniformIntronCover	1	57.4821	238	225	reps	0.351499	0.447776	0.142608	0.243529
Chr1	26889125	26889685	GPN2/ENSG00000142751.15/clean	0	-	10	4.64865e-06	0.999995	4.64865e-06	0.0712362	-	1	19.4818	247	243	0.00793573	NonUniformIntronCover	0.903636	3.66364	452	451	reps	0.0655376	0.0733657	0.0112176	0.00286215
Chr12	49105957	49106960	LMBR1L/ENSG00000139636.15/clean	0	-	256	4.92927e-06	4.92927e-06	0.999995	0.0229533	NonUniformIntronCover	1	4.83946	195	195	0.154875	-	1	24.0067	125	124	reps	0.0168656	0.0352764	0.168331	0.150568
Chr4	67635558	67638942	UBA6/ENSG00000033178.13/clean	0	-	383	4.98649e-06	0.999995	4.98649e-06	0.205843	-	1	22.8093	83	81	0.033329	-	0.974009	5.82681	169	167	reps	0.212201	0.192824	0.0453885	0.02633
Chr14	104770420	104770744	AKT1/ENSG00000142208.16/anti-near	0	-	10	5.08807e-06	0.999995	5.08807e-06	0.0872306	-	1	34.5952	336	333	0.0273273	-	1	22.8413	792	790	reps	0.10019	0.0621651	0.0385542	0.01653
Chr21	39348339	39348421	HMGN1/ENSG00000205581.11/clean	0	-	10	5.13929e-06	0.999995	5.13929e-06	0.0524436	-	1	129.233	2335	2321	0.0298134	-	1	115.267	3751	3742	reps	0.0393278	0.0700744	0.0278466	0.0328769
Chr5	112168820	112168994	EPB41L4A/ENSG00000129595.13/anti-near	0	-	10	5.24521e-06	0.999995	5.24521e-06	0.50115	-	1	23.1061	23	23	0.0374544	-	0.762195	1.71212	44	44	reps	0.287619	0.730429	0.0322581	0.0333333
Chr17	36515182	36515857	MYO19/ENSG00000278259.4/clean	0	-	10	5.53471e-06	0.999994	5.53471e-06	0.215709	MinorIsoform	1	44.2809	118	116	0.0760153	-	1	28.8764	337	334	reps	0.168143	0.277116	0.0610021	0.0870391
Chr5	36971036	36971944	NIPBL/ENSG00000164190.19/clean	0	+	10	5.64503e-06	0.999994	5.64503e-06	0.107541	NonUniformIntronCover	1	9.51944	77	77	0.00196056	-	0.349666	0.125	175	175	reps	0.0998393	0.12346	0.00499549	0.000962932
Chr6	53093978	53095512	FBXO9/ENSG00000112146.16/clean	0	+	170	5.79327e-06	0.999994	5.79327e-06	0.0678382	-	1	43.1557	593	544	0.0183485	NonUniformIntronCover	1	12.0934	647	640	reps	0.0512726	0.0898996	0.0151956	0.0224434
Chr22	26492368	26494138	TFIP11/ENSG00000100109.17/known-exon+anti-near+anti-over	0	-	10	5.8969e-06	5.8969e-06	0.999994	0.108291	-	1	47.3622	389	389	0.238896	-	1	78.4702	250	250	reps	0.119137	0.0980603	0.204684	0.290073
Chr3	179375341	179377041	MFN1/ENSG00000171109.19/clean	0	+	10	5.95925e-06	0.999994	5.95925e-06	0.199628	-	1	26.6879	107	94	0.0445973	-	1	10.5962	226	224	reps	0.120039	0.258672	0.0273215	0.0535735
Chr16	28590935	28591589	SGF29/ENSG00000176476.9/anti-near	0	+	10	6.01974e-06	0.999994	6.01974e-06	0.273528	-	1	66.6434	177	170	0.087988	-	1	15.0504	156	153	reps	0.279046	0.271225	0.0880607	0.0867903
Chr15	70672001	70676492	UACA/ENSG00000137831.15/clean	0	-	10	6.10112e-06	0.999994	6.10112e-06	0.181448	-	1	21.502	96	96	0.0350343	NonUniformIntronCover	1	7.47909	206	206	reps	0.136258	0.210118	0.0226589	0.0371559
Chr7	2542211	2543203	BRAT1/ENSG00000106009.16/clean	0	-	10	6.23652e-06	0.999994	6.23652e-06	0.20102	-	1	50.8223	196	196	0.0800121	-	1	38.1802	435	432	reps	0.231097	0.149431	0.0837361	0.0579725
Chr20	58989640	58989857	NELFCD/ENSG00000101158.15/clean	0	+	10	6.25393e-06	6.25393e-06	0.999994	0.0312916	-	1	49.2289	1524	1494	0.0704731	-	1	64.747	854	841	reps	0.0243782	0.0417531	0.080263	0.0578689
Chr12	8946405	8949487	M6PR/ENSG00000003056.8/anti-near	0	-	453	6.35812e-06	6.35812e-06	0.999994	0.0148653	-	1	14.7274	966	953	0.0525488	-	1	38.8243	700	679	reps	0.0124871	0.0166179	0.0478841	0.0567518
Chr10	103387352	103387520	TAF5/ENSG00000148835.11/anti-near	0	+	10	6.5566e-06	0.999993	6.5566e-06	0.294437	-	1	27.125	65	64	0.0624872	-	1	9.53125	143	143	reps	0.296703	0.290962	0.0983607	0.0385797
Chr11	65718954	65719046	KAT5/ENSG00000172977.13/known-exon+anti-near+anti-over	0	+	10	6.64781e-06	6.64781e-06	0.999993	0.30512	-	1	329.324	750	750	0.419619	-	1	422.235	584	584	reps	0.32343	0.282202	0.35293	0.525154
Chr20	41159963	41160105	PLCG1/ENSG00000124181.14/clean	0	+	10	6.73707e-06	0.999993	6.73707e-06	0.0437724	-	1	12.2222	260	260	0.00251889	-	1	1.38889	550	550	reps	0.025686	0.0638478	0.00177936	0.00337838
Chr14	49893157	49893255	ARF6/ENSG00000165527.7/clean	0	+	10	6.761e-06	0.999993	6.761e-06	0.254327	-	1	182.472	534	533	0.139814	-	1	68.9167	424	424	reps	0.251891	0.25712	0.120641	0.168283
Chr19	7933570	7933863	TIMM44/ENSG00000104980.8/clean	0	-	10	6.79619e-06	0.999993	6.79619e-06	0.211309	-	1	137.713	491	491	0.0989637	-	1	37.7826	340	340	reps	0.222818	0.20448	0.0763323	0.185635
Chr20	2835709	2836038	PCED1A/ENSG00000132635.17/clean	0	-	10	6.94107e-06	0.999993	6.94107e-06	0.192268	MinorIsoform	1	29.9922	126	88	0.059449	-	1	25.093	397	350	reps	0.161148	0.247194	0.0396055	0.0802795
Chr17	7317932	7318064	NEURL4/ENSG00000215041.10/clean	0	-	10	6.96108e-06	6.96108e-06	0.999993	0.0434254	-	1	14.3	315	315	0.146963	-	1	41.52	229	229	reps	0.0299335	0.0588868	0.182865	0.0991736
Chr11	85974812	85976622	PICALM/ENSG00000073921.18/clean	0	-	10	7.10973e-06	0.999993	7.10973e-06	0.0381414	MinorIsoform	1	15.6236	394	265	0.00455299	-	1	3.86944	846	817	reps	0.0240218	0.0487925	0.00703351	0.0010825
Chr11	63999036	63999330	MACROD1/ENSG00000133315.11/anti-over	0	-	10	7.37585e-06	0.999993	7.37585e-06	0.220982	-	1	118.289	391	391	0.117503	-	1	75.8947	524	524	reps	0.212258	0.235939	0.144045	0.0928824
Chr11	67609635	67610380	NDUFV1/ENSG00000167792.13/anti-near	0	+	10	7.54427e-06	7.54427e-06	0.999992	0.0235547	-	1	43.1559	1789	1786	0.0516546	-	1	81.5932	1498	1494	reps	0.0201502	0.0277297	0.0407482	0.0690105
Chr11	14513887	14514402	PSMA1/ENSG00000129084.17/clean	0	-	23	7.65801e-06	0.999992	7.65801e-06	0.0980306	-	1	356.813	3262	3262	0.0704826	-	1	325.298	4278	4276	reps	0.100624	0.095563	0.0685841	0.0711041
Chr2	218679729	218679892	STK36/ENSG00000163482.12/clean	0	+	10	7.71165e-06	0.999992	7.71165e-06	0.318182	-	1	14	27	25	0.0388601	-	1	4.28571	92	92	reps	0.235849	0.421576	0.0294118	0.0555556
Chr5	175509202	175510108	SFXN1/ENSG00000164466.13/clean	0	+	10	7.8472e-06	0.999992	7.8472e-06	0.0558717	-	1	22.9611	388	385	0.0113215	-	1	8.88611	775	774	reps	0.0594229	0.05344	0.0105541	0.0121083
Chr1	153636653	153638294	CHTOP/ENSG00000160679.13/known-exon	0	+	221	8.20121e-06	8.20121e-06	0.999992	0.052417	-	1	70.3627	1254	1254	0.0948372	NonUniformIntronCover	1	165.123	1567	1561	reps	0.0506768	0.0559925	0.0850887	0.103741
Chr19	35730616	35730706	KMT2B/ENSG00000272333.7/clean	0	+	10	8.23001e-06	0.999992	8.23001e-06	0.31925	-	1	67.0625	123	123	0.11434	-	1	20.6562	160	160	reps	0.320228	0.318003	0.132849	0.0897155
Chr6	32978388	32979827	BRD2/ENSG00000204256.13/clean	0	+	125	8.23749e-06	8.23749e-06	0.999992	0.0632495	-	1	270.553	3846	3816	0.0903956	-	1	322.485	3184	3149	reps	0.0809034	0.0490936	0.0896491	0.0905418
Chr9	97037615	97037917	CTSV/ENSG00000136943.11/clean	0	-	10	8.38991e-06	0.999992	8.38991e-06	0.104806	-	1	20.2542	173	173	0.0164332	NonUniformIntronCover	1	5.27966	316	316	reps	0.0666403	0.181628	0.0311853	0.00840336
Chr16	88723151	88723225	PIEZO1/ENSG00000103335.22/clean	0	-	10	8.49683e-06	0.999992	8.49683e-06	0.0812151	-	1	50.3846	570	556	0.0190044	NonUniformIntronCover	1	7.88462	401	401	reps	0.0635888	0.104641	0.0292148	0
Chr19	8465362	8465479	HNRNPM/ENSG00000099783.12/known-exon	0	+	10	8.62505e-06	0.999991	8.62505e-06	0.706734	-	1	1771.26	734	733	0.619368	-	1	2702.79	1661	1655	reps	0.682079	0.732775	0.605897	0.629099
Chr22	50518278	50518648	NCAPH2/ENSG00000025770.19/anti-near	0	+	10	8.63957e-06	0.999991	8.63957e-06	0.0628095	NonUniformIntronCover	1	32.2361	481	451	0.0120852	-	1	6.61806	541	539	reps	0.0563565	0.0732502	0.0136379	0.00956938
Chr1	26945473	26945567	NUDC/ENSG00000090273.14/known-exon+anti-near	0	+	10	8.90843e-06	0.999991	8.90843e-06	0.0272132	-	1	62.9706	2251	2250	0.0110516	NonUniformIntronCover	1	33.5588	3003	3002	reps	0.0169836	0.0390511	0.0107901	0.0117626
Chr17	42573024	42573106	PSMC3IP/ENSG00000131470.14/known-exon+anti-near+anti-over	0	-	10	8.99035e-06	8.99035e-06	0.999991	0.048142	-	1	52.6	1040	1036	0.110086	-	1	55.6667	450	450	reps	0.0515642	0.0472161	0.0979154	0.122153
Chr17	50378681	50378773	EME1/ENSG00000154920.14/anti-over	0	+	10	9.26592e-06	0.999991	9.26592e-06	0.305982	-	1	44.5294	91	91	0.0847608	MinorIsoform	1	11.2059	88	88	reps	0.279496	0.37037	0.0961145	0.07393
Chr10	99754634	99755624	CUTC/ENSG00000119929.13/clean	0	+	10	9.30784e-06	0.999991	9.30784e-06	0.146581	-	1	26.1071	118	117	0.0405004	-	1	18.2347	419	419	reps	0.179847	0.119532	0.0277469	0.0500841
Chr14	67692593	67692933	RDH11/ENSG00000072042.13/clean	0	-	10	9.40301e-06	9.40301e-06	0.999991	0.0150155	NonUniformIntronCover	1	8.70455	569	552	0.0681218	-	1	31.0682	425	409	reps	0.00959823	0.0190609	0.0370445	0.0999609
Chr10	73234940	73235192	FAM149B1/ENSG00000138286.15/anti-over	0	+	10	9.54464e-06	0.99999	9.54464e-06	0.537989	-	1	50.0714	43	41	0.209364	-	1	32.3061	122	113	reps	0.492329	0.596903	0.168836	0.236339
Chr11	47238001	47238137	DDB2/ENSG00000134574.12/anti-near	0	+	10	9.99582e-06	0.99999	9.99582e-06	0.148405	-	1	33.8077	194	194	0.0425809	-	1	15.0769	339	339	reps	0.156137	0.139167	0.0622039	0.0338798
Chr14	20990077	20990229	METTL17/ENSG00000165792.17/known-exon	0	+	10	1.02818e-05	1.02818e-05	0.99999	0.0606916	-	1	39.6724	614	612	0.139187	-	1	70.9828	439	439	reps	0.0722488	0.0439766	0.162087	0.116033
Chr7	43623620	43623708	STK17A/ENSG00000164543.7/anti-over	0	+	10	1.03283e-05	0.99999	1.03283e-05	0.271523	-	1	41	110	104	0.0930544	-	1	23.9062	232	231	reps	0.292538	0.243986	0.0756972	0.108571
Chr22	20090258	20091434	DGCR8/ENSG00000128191.16/clean	0	+	10	1.0377e-05	0.99999	1.0377e-05	0.0735836	-	1	25.3376	317	309	0.0103465	NonUniformIntronCover	0.939108	3.89957	373	371	reps	0.0256174	0.139111	0.0132022	0.00963222
ChrX	48975309	48976017	GRIPAP1/ENSG00000068400.13/clean	0	-	10	1.05305e-05	1.05305e-05	0.999989	0.254898	-	1	99.8929	271	271	0.443692	-	1	140.371	165	165	reps	0.269939	0.235521	0.437198	0.441038
Chr3	49014116	49014209	WDR6/ENSG00000178252.18/known-exon+anti-near	0	+	10	1.07402e-05	1.07402e-05	0.999989	0.170387	-	1	105.771	443	441	0.279566	-	1	218.086	555	555	reps	0.144707	0.207761	0.261826	0.293486
ChrX	49075281	49075363	WDR45/ENSG00000196998.19/clean	0	-	22	1.07978e-05	0.999989	1.07978e-05	0.235233	-	1	113.5	350	350	0.122736	-	1	62.9583	434	434	reps	0.203305	0.278948	0.132138	0.110169
Chr16	67934671	67934796	PSMB10/ENSG00000205220.12/anti-near	0	-	33	1.08378e-05	0.999989	1.08378e-05	0.172226	-	1	13.3158	55	53	0.0078125	NonUniformIntronCover	1	1	127	122	reps	0.118037	0.23419	0	0.0238095
Chr11	377327	379417	B4GALNT4/ENSG00000182272.12/clean	0	+	10	1.10589e-05	0.999989	1.10589e-05	0.297054	-	1	58.7392	137	134	0.131171	-	1	47.2548	312	312	reps	0.262389	0.344999	0.150793	0.113198
Chr11	65617509	65617610	PCNX3/ENSG00000197136.4/clean	0	+	10	1.12633e-05	0.999989	1.12633e-05	0.345301	-	1	54.3243	103	84	0.14527	-	1	43	253	247	reps	0.260672	0.451303	0.172454	0.0999518
Chr11	62835532	62835694	WDR74/ENSG00000133316.15/anti-near	0	-	10	1.22877e-05	0.999988	1.22877e-05	0.151475	-	1	147.097	820	820	0.0768612	-	1	46.2097	553	553	reps	0.0965561	0.195165	0.0877489	0.0600975
Chr16	2237126	2237217	DNASE1L2/ENSG00000167968.13/anti-near	0	+	10	1.24464e-05	0.999988	1.24464e-05	0.801338	-	1	36.303	9	9	0.130732	-	1	4.06061	27	27	reps	0.715925	0.873402	0.3	0.047619
Chr13	37003007	37004515	EXOSC8/ENSG00000120699.13/anti-near	0	+	82	1.25024e-05	0.999987	1.25024e-05	0.225322	-	1	100.928	347	314	0.11532	NonUniformIntronCover	1	62.6993	481	469	reps	0.196145	0.270026	0.0809485	0.151256
Chr8	94876285	94876445	INTS8/ENSG00000164941.14/anti-near	0	+	10	1.25557e-05	0.999987	1.25557e-05	0.106173	-	1	14.0167	118	118	0.00924423	-	1	2.18333	234	234	reps	0.116894	0.0925926	0.0104167	0.0073792
Chr13	32521449	32522181	N4BP2L2/ENSG00000244754.9/clean	0	-	10	1.27556e-05	0.999987	1.27556e-05	0.215224	-	1	59.2379	216	209	0.0869	NonUniformIntronCover	1	31.1207	327	322	reps	0.192165	0.250494	0.0766445	0.0964438
Chr14	23564660	23565118	AP1G2/ENSG00000213983.12/anti-over	0	-	134	1.30145e-05	1.30145e-05	0.999987	0.0362941	-	1	8.32308	221	221	0.148448	-	1	41.3154	237	237	reps	0.0302828	0.0434709	0.133134	0.175317
Chr14	55647007	55648024	KTN1/ENSG00000126777.18/clean	0	+	100	1.35332e-05	0.999986	1.35332e-05	0.0272816	-	1	11.8638	399	399	0.000752275	NonUniformIntronCover	0.593239	0.73297	783	783	reps	0.0198007	0.0336844	0.00113194	0.000589337
Chr11	65083723	65083932	CDCA5/ENSG00000146670.10/anti-near	0	-	10	1.35423e-05	0.999986	1.35423e-05	0.153507	-	1	225.049	1241	1237	0.0887115	-	1	72.037	740	737	reps	0.134539	0.173484	0.104296	0.0664769
Chr1	17409194	17409973	RCC2/ENSG00000179051.14/anti-near	0	-	10	1.35739e-05	0.999986	1.35739e-05	0.0589166	NonUniformIntronCover	1	68.0518	1087	1040	0.0268414	-	1	45.4272	1647	1599	reps	0.0499966	0.0679617	0.0270343	0.0251665
Chr3	49720653	49720799	RNF123/ENSG00000164068.16/known-exon+anti-near+anti-over	0	+	10	1.36084e-05	0.999986	1.36084e-05	0.512956	-	1	153.768	146	143	0.304258	-	1	105.393	240	238	reps	0.466937	0.592385	0.38742	0.219369
Chr19	39457740	39458293	SUPT5H/ENSG00000196235.14/clean	0	+	10	1.41076e-05	0.999986	1.41076e-05	0.0909353	-	1	102.132	1021	854	0.0383512	-	1	25.3242	635	605	reps	0.0961243	0.0850295	0.032136	0.0501743
Chr20	47652580	47652930	NCOA3/ENSG00000124151.19/anti-near	0	+	10	1.42753e-05	1.42753e-05	0.999986	0.0282881	-	1	4.27941	147	147	0.170496	-	1	26.5147	129	129	reps	0.0592065	0	0.203096	0.140672
Chr5	1325816	1330279	CLPTM1L/ENSG00000049656.14/clean	0	-	1072	1.43144e-05	0.999986	1.43144e-05	0.0530392	-	0.994987	41.3913	739	661	0.0194512	-	0.98614	30.8069	1553	1503	reps	0.0429799	0.0634708	0.0233788	0.0116524
Chr17	76735158	76736153	SRSF2/ENSG00000161547.17/known-exon+anti-near+anti-over	0	-	277	1.46357e-05	0.999985	1.46357e-05	0.168003	-	1	412.337	2042	1963	0.12762	-	1	549.757	3758	3598	reps	0.149967	0.190615	0.111865	0.139989
Chr2	27054807	27055074	AGBL5/ENSG00000084693.16/clean	0	+	10	1.47496e-05	0.999985	1.47496e-05	0.053408	-	1	12.8641	228	228	0.00704486	-	1	4.42718	624	624	reps	0.0338336	0.0970638	0.00738007	0.00560224
Chr2	238239568	238239660	HES6/ENSG00000144485.11/anti-over	0	-	10	1.47567e-05	1.47567e-05	0.999985	0.0149622	-	1	7.85294	517	494	0.0765517	-	1	22.3824	270	260	reps	0.00618079	0.0216313	0.0480568	0.148148
Chr16	792590	792717	CHTF18/ENSG00000127586.17/clean	0	+	10	1.48273e-05	1.48273e-05	0.999985	0.0134608	NonUniformIntronCover	1	10.5745	762	762	0.0511491	-	1	40.9149	736	735	reps	0.0119708	0.0180577	0.0618717	0.03969
Chr16	74915994	74916126	WDR59/ENSG00000103091.15/clean	0	-	10	1.52693e-05	1.52693e-05	0.999985	0.0215872	-	1	5.56	252	250	0.115661	-	1	31.52	241	231	reps	0.0338882	0.00813008	0.10109	0.126285
Chr19	48966406	48966582	FTL/ENSG00000087086.15/anti-near	0	+	10	1.55608e-05	0.999984	1.55608e-05	0.0105488	-	1	100.515	9428	9428	0.00486767	-	1	36.6029	7483	7481	reps	0.00812479	0.0125649	0.00443837	0.0055336
Chr2	241498349	241498638	STK25/ENSG00000115694.15/anti-near	0	-	10	1.55885e-05	0.999984	1.55885e-05	0.0889673	-	1	97.4602	804	802	0.0434685	-	1	49.7611	1046	1046	reps	0.0906239	0.0864019	0.0473193	0.0393591
Chr7	893815	893898	GET4/ENSG00000239857.7/anti-near	0	+	10	1.56361e-05	0.999984	1.56361e-05	0.0979307	-	1	93.5806	862	860	0.0503017	-	1	62.129	1172	1172	reps	0.0900906	0.107281	0.0636853	0.033538
Chr16	656537	656731	WDR90/ENSG00000161996.19/anti-near	0	+	10	1.58722e-05	0.999984	1.58722e-05	0.105556	-	1	20.7703	159	157	0.0161411	NonUniformIntronCover	1	4.67568	280	278	reps	0.0799705	0.156281	0.0320965	0.000980318
Chr22	36763013	36763918	IFT27/ENSG00000100360.15/clean	0	-	10	1.58873e-05	0.999984	1.58873e-05	0.232057	-	1	69.5014	196	196	0.103445	-	1	39.6908	332	332	reps	0.154371	0.346625	0.0823677	0.120279
Chr19	49461800	49461883	ALDH16A1/ENSG00000161618.10/clean	0	+	10	1.58894e-05	0.999984	1.58894e-05	0.652218	-	1	41.2581	22	18	0.247399	-	1	34.5161	105	91	reps	0.651195	0.628425	0.168831	0.33974
Chr11	17122333	17122701	PIK3C2A/ENSG00000011405.13/clean	0	-	10	1.60248e-05	0.999984	1.60248e-05	0.106361	NonUniformIntronCover	1	8.56944	72	68	0.00312631	-	0.689944	0.972222	220	220	reps	0.0249483	0.144482	0.009624	0
Chr17	18245660	18245743	FLII/ENSG00000177731.16/anti-near	0	-	10	1.61313e-05	1.61313e-05	0.999984	0.0633248	-	1	35.2903	522	510	0.150213	-	1	56.7419	321	308	reps	0.0767928	0.0431834	0.170121	0.13089
Chr11	770903	770992	GATD1/ENSG00000177225.17/clean	0	-	10	1.63874e-05	0.999984	1.63874e-05	0.522662	-	1	427.03	377	377	0.384867	-	1	317.212	505	498	reps	0.466173	0.60077	0.418728	0.34636
Chr11	93184520	93185690	SLC36A4/ENSG00000180773.15/clean	0	-	10	1.65279e-05	0.999983	1.65279e-05	0.0839442	MinorIsoform	1	11.8211	62	62	0.00708358	-	0.981897	2.16164	288	288	reps	0.0588942	0.0903863	0.00462992	0.00415112
Chr19	1011499	1011579	TMEM259/ENSG00000182087.14/known-exon+anti-near	0	-	10	1.66404e-05	1.66404e-05	0.999983	0.059188	-	1	79.1429	1258	1257	0.107867	-	1	112.929	934	934	reps	0.0641829	0.0524318	0.141957	0.0733366
Chr20	63941043	63941109	UCKL1/ENSG00000198276.16/known-exon	0	-	10	1.72825e-05	1.72825e-05	0.999983	0.086313	-	1	59.0417	625	551	0.170946	-	1	92.375	448	400	reps	0.0856	0.0868548	0.170302	0.17096
Chr11	47182559	47182673	PACSIN3/ENSG00000165912.16/clean	0	-	10	1.72839e-05	0.999983	1.72839e-05	0.103463	-	1	11.3095	98	77	0.0130999	-	1	5.30952	400	368	reps	0.0853659	0.165803	0.00907441	0.0180251
Chr17	58005600	58005800	SRSF1/ENSG00000136450.13/known-exon	0	-	10	1.73814e-05	0.999983	1.73814e-05	0.254936	-	1	73.5658	215	198	0.147712	-	1	379.382	2135	2134	reps	0.211557	0.297381	0.106009	0.196492
Chr1	153973078	153973194	CREB3L4/ENSG00000143578.16/anti-over	0	+	12	1.74243e-05	0.999983	1.74243e-05	0.40355	NonUniformIntronCover	1	8.11905	11	11	0.0153846	-	1	1	63	63	reps	0.416667	0.391304	0	0.0357143
Chr19	6420144	6420421	KHSRP/ENSG00000088247.17/clean	0	-	10	1.74343e-05	0.999983	1.74343e-05	0.0221874	-	1	64.5327	2475	2472	0.00915705	-	1	28.2056	3047	3043	reps	0.0243377	0.0208924	0.0125576	0.0065139
Chr9	35074216	35074370	FANCG/ENSG00000221829.10/clean	0	-	10	1.74493e-05	0.999983	1.74493e-05	0.158332	-	1	40.069	213	178	0.049992	NonUniformIntronCover	1	16.1552	307	277	reps	0.144132	0.171992	0.0564278	0.0474665
Chr5	31409159	31409249	DROSHA/ENSG00000113360.16/clean	0	-	10	1.76256e-05	0.999982	1.76256e-05	0.0710741	-	1	23.7188	310	275	0.0159972	-	1	8.4375	519	508	reps	0.0558925	0.0930892	0.0195362	0.0131148
Chr16	2237301	2237375	DNASE1L2/ENSG00000167968.13/anti-near	0	+	10	1.7717e-05	0.999982	1.7717e-05	0.794141	-	1	38.5769	10	10	0.163218	-	1	5.46154	28	28	reps	0.701578	0.908127	0.214765	0.136364
Chr16	88627782	88627919	ZC3H18/ENSG00000158545.15/clean	0	+	10	1.83037e-05	0.999982	1.83037e-05	0.0933583	-	1	49.9412	481	481	0.0317866	-	1	18.549	564	563	reps	0.0731594	0.118683	0.0358127	0.0249602
Chr1	45659142	45660183	GPBP1L1/ENSG00000159592.11/clean	0	-	10	1.85235e-05	0.999981	1.85235e-05	0.0359845	-	1	20.5303	550	541	0.00131272	NonUniformIntronCover	0.481086	0.452785	366	364	reps	0.0190024	0.0549802	0.00162778	0.00190755
Chr15	75358344	75358461	MAN2C1/ENSG00000140400.17/anti-near	0	-	10	1.86071e-05	0.999981	1.86071e-05	0.321905	-	1	95.4186	201	186	0.15994	-	1	51.9767	273	258	reps	0.341508	0.267763	0.14924	0.175028
Chr17	44321558	44321699	SLC25A39/ENSG00000013306.16/anti-near	0	-	10	1.86145e-05	0.999981	1.86145e-05	0.0207211	-	1	31.3585	1482	1363	0.00570821	NonUniformIntronCover	1	13.1698	2294	2258	reps	0.0133615	0.0324783	0.00895677	0.00294593
Chr20	2660176	2660262	IDH3B/ENSG00000101365.21/anti-near	0	-	10	1.86179e-05	1.86179e-05	0.999981	0.0165548	-	1	37	2186	2185	0.0390493	-	1	57.0938	1370	1370	reps	0.0155776	0.017413	0.0446387	0.0299452
Chr1	231267903	231270757	GNPAT/ENSG00000116906.13/clean	0	+	222	1.88057e-05	0.999981	1.88057e-05	0.149949	-	0.996201	33.5161	167	144	0.0482296	NonUniformIntronCover	1	18.2932	354	350	reps	0.112603	0.191626	0.0427873	0.0523425
Chr1	241508785	241511966	FH/ENSG00000091483.7/clean	0	-	110	1.88462e-05	0.999981	1.88462e-05	0.0818276	-	1	23.4386	258	256	0.0138769	NonUniformIntronCover	0.987301	5.10822	362	362	reps	0.0580921	0.10441	0.00965952	0.0144963
Chr15	90931944	90932054	HDDC3/ENSG00000184508.12/anti-over	0	-	10	1.90646e-05	0.999981	1.90646e-05	0.292154	-	1	21.875	52	52	0.0895655	-	1	30.3	306	304	reps	0.259259	0.388235	0.0491714	0.136553
Chr17	29477706	29478250	TAOK1/ENSG00000160551.11/clean	0	+	10	1.91516e-05	0.999981	1.91516e-05	0.162613	-	1	15.3411	79	73	0.00527527	-	0.631086	0.827103	119	114	reps	0.20337	0.144	0.00470621	0.00556315
Chr17	7314597	7314958	GPS2/ENSG00000132522.16/anti-near	0	-	10	1.93181e-05	0.999981	1.93181e-05	0.117972	-	1	66.3404	496	491	0.0479202	NonUniformIntronCover	1	28.5887	568	565	reps	0.132707	0.103868	0.0354721	0.0692656
Chr19	49645134	49645353	SCAF1/ENSG00000126461.15/clean	0	+	10	1.98715e-05	0.99998	1.98715e-05	0.0656758	-	1	33.5294	461	453	0.0157185	NonUniformIntronCover	1	8.62353	513	512	reps	0.0440629	0.108021	0.00555718	0.0260456
Chr22	21628787	21629009	YDJC/ENSG00000161179.14/anti-near	0	-	10	2.0048e-05	0.99998	2.0048e-05	0.164876	-	1	129.907	658	512	0.0995346	MinorIsoform	1	134.302	1215	796	reps	0.163022	0.168386	0.0961422	0.105637
Chr7	24865465	24866069	OSBPL3/ENSG00000070882.13/clean	0	-	10	2.03424e-05	0.99998	2.03424e-05	0.127863	-	1	20.5252	134	134	0.0101197	NonUniformIntronCover	0.964646	1.60504	155	155	reps	0.148629	0.115463	0.0131579	0.0123482
Chr16	89905096	89906193	TCF25/ENSG00000141002.20/clean	0	+	10	2.14139e-05	0.999979	2.14139e-05	0.139953	-	1	92.1034	465	465	0.0718814	-	1	62.7333	779	779	reps	0.119265	0.170835	0.0730607	0.0715596
Chr11	33106064	33107902	CSTF3/ENSG00000176102.13/anti-near	0	-	10	2.14148e-05	0.999979	2.14148e-05	0.0990821	-	1	11.7678	99	99	0.0108246	NonUniformIntronCover	0.90919	3.1735	290	290	reps	0.116624	0.0833539	0.00408132	0.0142696
Chr2	86132424	86133177	PTCD3/ENSG00000132300.19/clean	0	+	206	2.20244e-05	0.999978	2.20244e-05	0.151647	-	1	76.5068	428	404	0.0655708	-	1	29.9635	423	423	reps	0.14057	0.143075	0.0732541	0.0594884
Chr19	14120665	14121531	ASF1B/ENSG00000105011.9/anti-near	0	-	255	2.21785e-05	0.999978	2.21785e-05	0.0411215	-	1	47.1306	1097	1097	0.0127401	NonUniformIntronCover	1	13.1755	1018	1018	reps	0.0453333	0.0355316	0.0165091	0.00919118
Chr19	55095940	55096050	PPP1R12C/ENSG00000125503.13/clean	0	-	10	2.21967e-05	0.999978	2.21967e-05	0.143583	-	1	62.2	370	370	0.0493149	NonUniformIntronCover	1	15.925	307	307	reps	0.0958294	0.195724	0.0637652	0.0245852
Chr9	137588718	137590212	ZMYND19/ENSG00000165724.6/clean	0	-	398	2.26353e-05	2.26353e-05	0.999977	0.0347688	-	1	53.3114	1480	1450	0.0674828	NonUniformIntronCover	1	104.786	1448	1344	reps	0.0377816	0.0299421	0.0645069	0.0704271
Chr5	69177349	69177523	CCNB1/ENSG00000134057.15/clean	0	+	19	2.26995e-05	0.999977	2.26995e-05	0.0380207	-	1	55.1746	1370	1370	0.0130611	NonUniformIntronCover	1	16.2381	1225	1225	reps	0.0175611	0.0564025	0.0107594	0.0150331
Chr20	62126439	62127584	LSM14B/ENSG00000149657.20/clean	0	+	10	2.28149e-05	2.28149e-05	0.999977	0.0123836	NonUniformIntronCover	0.923348	5.31648	424	349	0.0648356	-	1	28.2176	407	310	reps	0.012661	0.0147094	0.0516489	0.07149
Chr17	81888418	81888519	ALYREF/ENSG00000183684.8/clean	0	-	10	2.29311e-05	0.999977	2.29311e-05	0.0149242	-	1	58.1622	3774	3771	0.0055585	NonUniformIntronCover	1	21	3716	3711	reps	0.0125908	0.0179753	0.00684092	0.0032105
Chr22	41256105	41256190	RANGAP1/ENSG00000100401.19/clean	0	-	10	2.32e-05	0.999977	2.32e-05	0.0697292	-	1	87.5484	1164	1162	0.0352246	NonUniformIntronCover	1	53.4516	1452	1452	reps	0.0690256	0.0685314	0.0405133	0.0248378
Chr11	47234672	47234756	DDB2/ENSG00000134574.12/anti-near	0	+	10	2.32746e-05	0.999977	2.32746e-05	0.269765	NonUniformIntronCover	1	44.7	121	96	0.103482	-	1	27.9333	242	222	reps	0.278467	0.259099	0.16053	0.0609029
Chr7	55981567	55982209	NIPSNAP2/ENSG00000146729.10/clean	0	+	10	2.33583e-05	0.999977	2.33583e-05	0.0354831	-	1	15.7087	408	406	0.0046869	-	1	3.3622	714	703	reps	0.0335775	0.0382684	0.0046914	0.00471137
Chr1	156562665	156563133	IQGAP3/ENSG00000183856.11/clean	0	-	10	2.34391e-05	0.999977	2.34391e-05	0.442096	-	1	81.6196	87	87	0.194439	-	1	31.6196	128	128	reps	0.402141	0.475554	0.226948	0.173485
Chr16	2090194	2090284	PKD1/ENSG00000008710.20/known-exon+anti-near	0	-	10	2.36921e-05	0.999976	2.36921e-05	0.0625508	-	1	38.5	543	543	0.0155334	NonUniformIntronCover	1	8.03125	505	503	reps	0.0660722	0.0562653	0.0286678	0.00119648
Chr22	50219791	50219956	TUBGCP6/ENSG00000128159.12/anti-near	0	-	10	2.37879e-05	0.999976	2.37879e-05	0.243719	-	1	55.4286	152	152	0.0855955	NonUniformIntronCover	1	17.3175	182	182	reps	0.17945	0.35282	0.0675964	0.109269
Chr11	63999560	63999641	MACROD1/ENSG00000133315.11/anti-over	0	-	10	2.44108e-05	0.999976	2.44108e-05	0.0725403	-	1	44.0345	563	553	0.0253646	-	1	19.3103	742	729	reps	0.0761537	0.0643521	0.0245536	0.0281288
Chr19	806556	807868	PTBP1/ENSG00000011304.20/anti-near	0	+	10	2.44597e-05	0.999976	2.44597e-05	0.0521329	-	1	130.351	2370	2287	0.0308063	NonUniformIntronCover	1	113.602	3574	3489	reps	0.0477941	0.0567618	0.0288582	0.0326642
Chr17	3656586	3656675	CTNS/ENSG00000040531.16/anti-over	0	+	10	2.44964e-05	0.999976	2.44964e-05	0.216579	-	1	33.7273	122	122	0.0391015	NonUniformIntronCover	1	4.27273	105	105	reps	0.250541	0.17744	0.0491803	0.0226843
Chr1	235175399	235177799	ARID4B/ENSG00000054267.22/clean	0	-	189	2.45421e-05	0.999975	2.45421e-05	0.239601	MinorIsoform	1	50.4158	149	119	0.0726091	-	1	12.6836	162	159	reps	0.204991	0.268012	0.0317786	0.136251
Chr22	38073823	38074306	PICK1/ENSG00000100151.16/anti-over	0	+	96	2.4545e-05	0.999975	2.4545e-05	0.35793	-	1	101.458	182	178	0.18372	NonUniformIntronCover	1	55.1419	244	243	reps	0.339697	0.385645	0.208452	0.152024
Chr11	45904564	45904717	MAPK8IP1/ENSG00000121653.11/anti-near	0	+	10	2.4682e-05	0.999975	2.4682e-05	0.159098	-	1	24.4068	128	128	0.0206897	-	1	3	138	138	reps	0.162617	0.156627	0.015873	0.0243902
Chr19	45352649	45352745	ERCC2/ENSG00000104884.16/anti-near	0	-	10	2.47587e-05	0.999975	2.47587e-05	0.0745862	-	1	21.2778	264	262	0.0110497	-	1	4	358	356	reps	0.0576777	0.103614	0.0105263	0.0115607
Chr17	4720640	4720945	ARRB2/ENSG00000141480.18/anti-near	0	+	10	2.49191e-05	0.999975	2.49191e-05	0.160145	-	1	93.2437	465	465	0.0768662	NonUniformIntronCover	1	41.9664	497	495	reps	0.169819	0.148061	0.0682976	0.0781509
Chr12	49104551	49104745	LMBR1L/ENSG00000139636.15/clean	0	-	37	2.49421e-05	2.49421e-05	0.999975	0.0173913	-	1	4	226	203	0.118635	NonUniformIntronCover	1	20.1905	150	143	reps	0.0134555	0.0235054	0.142857	0.0963325
Chr17	41818527	41819209	FKBP10/ENSG00000141756.19/clean	0	+	10	2.50997e-05	2.50997e-05	0.999975	0.0562904	-	1	62.5111	1048	1040	0.10588	-	1	117.47	992	978	reps	0.0579633	0.0524526	0.138463	0.0801549
Chr9	136463132	136463462	SEC16A/ENSG00000148396.18/clean	0	-	10	2.51181e-05	0.999975	2.51181e-05	0.14328	-	1	43.1484	250	237	0.0539779	NonUniformIntronCover	1	28.5859	501	492	reps	0.154061	0.131174	0.0881648	0.0250272
Chr20	34942627	34942930	GSS/ENSG00000100983.12/clean	0	-	10	2.52022e-05	2.52022e-05	0.999975	0.0411405	-	1	22.3109	509	509	0.101542	-	1	77.7563	672	672	reps	0.0422242	0.0410514	0.0758616	0.135155
Chr17	4551997	4552124	MYBBP1A/ENSG00000132382.14/clean	0	-	10	2.53235e-05	0.999975	2.53235e-05	0.0393957	-	1	19.8085	472	472	0.00386847	NonUniformIntronCover	1	2	515	515	reps	0.0335881	0.0462159	0.00689655	3.76506e-05
Chr19	805569	806407	PTBP1/ENSG00000011304.20/clean	0	+	10	2.53945e-05	0.999975	2.53945e-05	0.0538991	-	1	102.602	1463	1461	0.0298329	-	1	83.8253	2126	2126	reps	0.043648	0.0672787	0.0325656	0.0273278
Chr19	40588779	40589081	SHKBP1/ENSG00000160410.15/clean	0	+	10	2.54868e-05	0.999975	2.54868e-05	0.114033	-	1	48.6525	377	370	0.0367756	NonUniformIntronCover	1	14.661	384	377	reps	0.106297	0.117077	0.0493232	0.0266148
Chr15	89328831	89328942	POLG/ENSG00000140521.15/clean	0	-	10	2.56731e-05	0.999974	2.56731e-05	0.142887	-	1	33.3415	200	197	0.0352941	NonUniformIntronCover	1	9	246	245	reps	0.127264	0.156444	0.0367803	0.0345613
Chr17	82083115	82083201	FASN/ENSG00000169710.9/clean	0	-	10	2.63709e-05	2.63709e-05	0.999974	0.00208594	NonUniformIntronCover	1	5	2392	2392	0.0115579	-	1	28.4375	2432	2432	reps	0.00384911	0	0.0130903	0.0084122
Chr17	7512923	7513020	POLR2A/ENSG00000181222.17/clean	0	+	10	2.63866e-05	2.63866e-05	0.999974	0.0205155	-	1	50.1429	2394	2394	0.0449167	-	1	58.4571	1243	1242	reps	0.0265381	0.0156593	0.050761	0.0387289
Chr1	44219477	44219805	DMAP1/ENSG00000178028.14/anti-near	0	+	36	2.67521e-05	2.67521e-05	0.999973	0.0205211	NonUniformIntronCover	1	11.3136	540	531	0.0752503	-	1	31.0847	382	379	reps	0.0211902	0.0211308	0.0568157	0.103386
Chr16	30084855	30084932	PPP4C/ENSG00000149923.14/anti-near	0	+	10	2.71663e-05	0.999973	2.71663e-05	0.0916119	-	1	140.889	1397	1397	0.0529446	-	1	83.0741	1486	1486	reps	0.09284	0.0910891	0.0579367	0.0458466
Chr9	136381392	136381823	SNAPC4/ENSG00000165684.4/clean	0	-	10	2.75112e-05	0.999972	2.75112e-05	0.145606	NonUniformIntronCover	1	67.6568	374	374	0.0594374	-	1	24.2663	381	381	reps	0.12597	0.167417	0.0684485	0.0594351
Chr8	144106674	144106834	MAF1/ENSG00000179632.10/anti-over	0	+	10	2.80131e-05	0.999972	2.80131e-05	0.083295	-	1	60.3333	664	648	0.0330037	-	1	25.7	753	740	reps	0.0878545	0.0769715	0.0415966	0.0177184
Chr11	17122813	17129299	PIK3C2A/ENSG00000011405.13/clean	0	-	10	2.80806e-05	0.999972	2.80806e-05	0.215078	-	0.995676	13.7006	50	45	0.0328855	-	0.946726	5.67863	167	167	reps	0.152202	0.228989	0.0178764	0.0397688
Chr17	82055825	82056000	GPS1/ENSG00000169727.12/anti-near	0	+	10	2.81134e-05	0.999972	2.81134e-05	0.0274045	-	1	35.6716	1261	1260	0.0072051	NonUniformIntronCover	1	9.76119	1336	1335	reps	0.0230678	0.0355366	0.0036847	0.0113053
Chr16	2208613	2208758	MLST8/ENSG00000167965.18/known-exon+anti-near	0	+	10	2.86147e-05	0.999971	2.86147e-05	0.0959494	-	1	53.4909	504	504	0.0442889	-	1	58.4364	1261	1261	reps	0.0673959	0.156633	0.0473364	0.039163
Chr22	37061629	37062524	KCTD17/ENSG00000100379.17/anti-near	0	+	10	2.90914e-05	2.90914e-05	0.999971	0.140648	MinorIsoform	1	27.3324	85	85	0.317199	-	1	101.273	170	170	reps	0.113951	0.190657	0.284939	0.348012
Chr2	43975217	43976142	LRPPRC/ENSG00000138095.19/clean	0	-	10	2.95611e-05	0.99997	2.95611e-05	0.0251756	-	1	21.7711	843	831	0.00202716	-	0.855738	1.57221	774	769	reps	0.0182442	0.0303373	0.00536429	0.000288947
Chr18	74519096	74519998	CNDP2/ENSG00000133313.15/clean	0	+	10	2.9824e-05	0.99997	2.9824e-05	0.0561911	-	1	16.4916	277	276	0.00533115	NonUniformIntronCover	1	2.11173	394	391	reps	0.037468	0.0844873	0.00529181	0.00255133
Chr11	65210872	65211259	CAPN1/ENSG00000014216.16/clean	0	+	10	2.99442e-05	0.99997	2.99442e-05	0.0241021	-	1	15.5099	628	628	0.00223809	-	1	1.94702	868	868	reps	0.0157628	0.0466602	0.00495492	0
Chr5	178142728	178142851	RMND5B/ENSG00000145916.19/clean	0	+	10	3.01366e-05	0.99997	3.01366e-05	0.228081	-	1	60.2766	204	202	0.0923505	-	1	26.1489	257	257	reps	0.191193	0.299584	0.128597	0.0497779
Chr1	201868796	201869589	IPO9/ENSG00000198700.10/clean	0	+	10	3.04932e-05	0.99997	3.04932e-05	0.0467747	-	1	21.6889	441	441	0.00808974	-	1	4.90159	601	601	reps	0.0534905	0.0373981	0.0113929	0.00756307
Chr11	247448	248775	PSMD13/ENSG00000185627.18/clean	0	+	10	3.07776e-05	0.999969	3.07776e-05	0.0452657	-	1	57.6528	1216	1195	0.0182193	-	1	25.8691	1394	1392	reps	0.0437521	0.0443447	0.0162516	0.0187838
Chr15	75468983	75469791	PTPN9/ENSG00000169410.10/clean	0	-	10	3.08971e-05	0.999969	3.08971e-05	0.0686338	-	1	14.9594	203	203	0.00238101	NonUniformIntronCover	0.625313	0.8125	262	262	reps	0.0750436	0.0650884	0.00279239	0.00360849
Chr11	13700492	13707899	FAR1/ENSG00000197601.13/clean	0	+	10	3.11127e-05	0.999969	3.11127e-05	0.106836	-	1	37.6786	314	305	0.0392441	NonUniformIntronCover	1	25.121	613	608	reps	0.0808568	0.11921	0.0434554	0.0370839
Chr16	1202452	1204009	CACNA1H/ENSG00000196557.13/anti-near	0	+	10	3.1241e-05	0.999969	3.1241e-05	0.218961	-	1	36.7254	128	127	0.0600318	NonUniformIntronCover	1	10.6656	167	166	reps	0.21942	0.234044	0.0635018	0.0510986
Chr11	47238183	47238799	DDB2/ENSG00000134574.12/anti-near	0	+	10	3.12938e-05	0.999969	3.12938e-05	0.153354	-	1	36.0451	199	195	0.0502576	-	1	17.9918	340	340	reps	0.180819	0.117729	0.0997985	0.0218933
Chr3	52693329	52693407	GNL3/ENSG00000163938.17/anti-near	0	+	10	3.1572e-05	3.1572e-05	0.999968	0.109393	-	1	214.214	1741	1740	0.157154	-	1	276.143	1475	1475	reps	0.11335	0.10694	0.152569	0.162011
Chr11	11902860	11903262	USP47/ENSG00000170242.19/clean	0	+	10	3.16019e-05	0.999968	3.16019e-05	0.0527621	-	1	14.8165	260	260	0.00166138	-	0.42602	0.316456	254	254	reps	0.0284397	0.0687385	0.00424213	0
Chr1	163336848	163338019	NUF2/ENSG00000143228.13/clean	0	+	10	3.18387e-05	0.999968	3.18387e-05	0.101632	-	1	41.8581	370	340	0.0311235	-	1	12.3032	383	377	reps	0.0742783	0.138716	0.0304825	0.0319944
Chr2	218679261	218679559	STK36/ENSG00000163482.12/clean	0	+	10	3.21226e-05	0.999968	3.21226e-05	0.389373	-	1	20.4052	32	30	0.0806308	NonUniformIntronCover	1	8.59483	92	92	reps	0.385634	0.390417	0.068089	0.108434
Chr19	49857130	49857692	PTOV1/ENSG00000104960.15/anti-over	0	+	10	3.24604e-05	3.24604e-05	0.999968	0.0737174	-	1	130.757	1638	1638	0.115877	-	1	187.946	1434	1433	reps	0.0759645	0.0690029	0.139797	0.0895081
ChrX	154380802	154380881	EMD/ENSG00000102119.11/anti-near	0	+	10	3.27465e-05	0.999967	3.27465e-05	0.0761905	-	1	88	1067	1065	0.0399788	-	1	65.1724	1565	1565	reps	0.0770248	0.0758725	0.0511885	0.0261857
Chr16	2237649	2237766	DNASE1L2/ENSG00000167968.13/anti-near	0	+	10	3.30938e-05	0.999967	3.30938e-05	0.845878	-	1	27.4419	5	5	0.15625	-	1	5	27	23	reps	0.705882	1	0.0952381	0.272727
Chr5	179617932	179617988	HNRNPH1/ENSG00000169045.17/clean	0	-	10	3.30953e-05	0.999967	3.30953e-05	0.110058	-	1	195.15	1572	1572	0.072895	-	1	183.75	2326	2326	reps	0.106332	0.114816	0.075148	0.0676692
Chr17	38730406	38730759	CISD3/ENSG00000277972.2/known-exon+anti-near	0	+	10	3.31288e-05	3.31288e-05	0.999967	0.0674134	-	1	16.6259	226	226	0.192491	NonUniformIntronCover	1	60.3094	246	246	reps	0.0554282	0.0909462	0.18498	0.225394
ChrX	48706627	48707436	SUV39H1/ENSG00000101945.17/anti-over	0	+	10	3.38383e-05	0.999966	3.38383e-05	0.235101	NonUniformIntronCover	1	63.9315	208	203	0.0933033	-	1	22.2274	215	215	reps	0.239051	0.217108	0.0859672	0.102974
Chr2	37259681	37260222	PRKD3/ENSG00000115825.10/clean	0	-	10	3.39068e-05	0.999966	3.39068e-05	0.0737709	-	1	13.5399	169	169	0.00811176	NonUniformIntronCover	1	2.78873	341	341	reps	0.0508125	0.0974576	0.0136203	0.00479859
Chr3	50290472	50290559	IFRD2/ENSG00000214706.10/anti-near	0	-	10	3.41727e-05	0.999966	3.41727e-05	0.094586	-	1	77.0968	589	589	0.040619	-	1	26.4194	599	599	reps	0.0801105	0.107486	0.0304803	0.0556619
Chr10	73789824	73789955	ZSWIM8/ENSG00000214655.10/clean	0	+	10	3.46879e-05	3.46879e-05	0.999965	0.0774583	-	1	15.449	184	183	0.235294	-	1	40	130	129	reps	0.062201	0.0880328	0.263711	0.209313
Chr7	2374606	2375388	EIF3B/ENSG00000106263.18/clean	0	+	10	3.47524e-05	0.999965	3.47524e-05	0.0170702	NonUniformIntronCover	1	20.8226	1196	1196	0.00442197	-	1	13.1516	2960	2960	reps	0.010218	0.0265899	0.00499192	0.00383511
Chr1	24669587	24670119	SRRM1/ENSG00000133226.17/clean	0	+	10	3.47901e-05	0.999965	3.47901e-05	0.0483669	-	1	53.8238	1059	1059	0.0172031	NonUniformIntronCover	1	17.7143	1011	1011	reps	0.0446434	0.0562159	0.0128669	0.0204838
Chr14	23560036	23560254	AP1G2/ENSG00000213983.12/known-exon+anti-near+anti-over	0	-	10	3.50496e-05	3.50496e-05	0.999965	0.0488423	-	1	13.7619	266	266	0.150457	-	1	53.131	299	299	reps	0.0322456	0.0805559	0.175266	0.126145
Chr10	98434091	98435271	HPS1/ENSG00000107521.19/clean	0	-	196	3.53323e-05	3.53323e-05	0.999965	0.0267788	-	1	14.033	510	392	0.0886271	NonUniformIntronCover	1	31.5076	324	276	reps	0.0209196	0.0323998	0.0732527	0.106005
Chr2	229792065	229792152	TRIP12/ENSG00000153827.13/clean	0	-	10	3.54899e-05	0.999965	3.54899e-05	0.0371897	-	1	11.9355	309	309	0.00124655	NonUniformIntronCover	0.480519	0.483871	384	384	reps	0.0609756	0.0127389	0.00170032	0.00237316
Chr7	6641962	6642381	ZNF316/ENSG00000205903.7/clean	0	+	38	3.58071e-05	0.999964	3.58071e-05	0.288445	MinorIsoform	1	73.7778	182	124	0.116982	-	1	22.1242	167	163	reps	0.310373	0.286521	0.101238	0.142686
Chr16	672181	672253	RHOT2/ENSG00000140983.14/clean	0	+	10	3.62332e-05	0.999964	3.62332e-05	0.0788067	-	1	83.9231	978	978	0.0399133	-	1	52.4231	1256	1256	reps	0.0665308	0.0973371	0.0393701	0.0400501
Chr17	63821115	63821353	FTSJ3/ENSG00000108592.17/anti-near	0	-	10	3.72532e-05	0.999963	3.72532e-05	0.0601797	-	1	16.4565	253	253	0.0104985	NonUniformIntronCover	1	6.21739	578	578	reps	0.0849503	0.0357143	0.0139836	0.00201207
Chr2	85390265	85390759	ELMOD3/ENSG00000115459.18/known-exon+anti-near	0	+	10	3.82152e-05	0.999962	3.82152e-05	0.438538	-	1	44.5206	57	57	0.139318	NonUniformIntronCover	1	12.4639	77	77	reps	0.451841	0.438035	0.127436	0.155459
Chr21	45504556	45505133	COL18A1/ENSG00000182871.16/anti-over	0	+	10	3.82871e-05	0.999962	3.82871e-05	0.0560439	-	1	15.674	262	260	0.00512513	NonUniformIntronCover	0.638448	1.88546	365	364	reps	0.0442649	0.0864028	0.00502237	0.00436207
Chr1	201874936	201875151	IPO9/ENSG00000198700.10/clean	0	+	10	3.88995e-05	0.999961	3.88995e-05	0.11913	-	1	54.0964	391	384	0.0460695	-	1	22.8916	474	470	reps	0.0757065	0.173673	0.0302209	0.0627501
Chr22	46352330	46353766	TRMU/ENSG00000100416.15/clean	0	+	337	3.94076e-05	3.94076e-05	0.999961	0.0579452	NonUniformIntronCover	1	35.2449	573	498	0.132417	-	1	58.3039	382	368	reps	0.0604044	0.0551547	0.122415	0.137177
Chr5	40763022	40764513	PRKAA1/ENSG00000132356.11/clean	0	-	10	3.99719e-05	0.99996	3.99719e-05	0.319806	-	1	37.1433	65	65	0.127382	-	1	38.8297	247	246	reps	0.303255	0.323059	0.158445	0.109655
Chr11	45905249	45905648	MAPK8IP1/ENSG00000121653.11/anti-near	0	+	10	4.16533e-05	0.999958	4.16533e-05	0.119333	-	1	19.7834	146	146	0.0124233	NonUniformIntronCover	1	2.01274	160	160	reps	0.130865	0.108372	0.0232558	0.00745317
Chr3	49121362	49121432	LAMB2/ENSG00000172037.14/clean	0	-	10	4.16986e-05	0.999958	4.16986e-05	0.19834	-	1	39.8333	161	161	0.0655232	NonUniformIntronCover	1	15.9167	227	227	reps	0.18552	0.221321	0.0938691	0.0393487
Chr7	143304783	143304939	CASP2/ENSG00000106144.20/clean	0	+	10	4.21768e-05	0.999958	4.21768e-05	0.0785908	-	1	24.65	289	289	0.0121317	NonUniformIntronCover	1	3.26667	263	263	reps	0.0731267	0.0850559	0.0239072	0.0027142
Chr2	218745801	218746154	TTLL4/ENSG00000135912.11/clean	0	+	10	4.26525e-05	0.999957	4.26525e-05	0.0842209	NonUniformIntronCover	1	11.036	117	117	0	-	0	0	170	170	reps	0.062576	0.0956109	0	0
Chr10	42820688	42820933	BMS1/ENSG00000165733.8/clean	0	+	70	4.28215e-05	0.999957	4.28215e-05	0.0490478	-	1	22.1268	429	396	0.00831626	-	1	4.74648	566	565	reps	0.0240103	0.0711217	0.0033557	0.0137361
Chr8	144099430	144099509	SHARPIN/ENSG00000179526.17/anti-near	0	-	10	4.30726e-05	4.30726e-05	0.999957	0.0499299	NonUniformIntronCover	1	19.6552	370	366	0.138922	-	1	44.6897	275	273	reps	0.0491803	0.0511521	0.155094	0.11241
Chr1	93133980	93134090	MTF2/ENSG00000143033.18/clean	0	+	10	4.35626e-05	0.999956	4.35626e-05	0.0338076	-	1	18.475	493	493	0.002	NonUniformIntronCover	1	1	497	496	reps	0.0327273	0.0341904	0.00442478	0
ChrX	23706739	23707876	ACOT9/ENSG00000123130.17/clean	0	-	56	4.38854e-05	4.38854e-05	0.999956	0.0964152	-	1	124.949	1171	1167	0.155002	-	1	146.748	800	797	reps	0.0919173	0.0995014	0.154132	0.152891
Chr9	93558718	93561108	FAM120A/ENSG00000048828.17/clean	0	+	10	4.46873e-05	4.46873e-05	0.999955	0.123838	-	1	78.4443	555	447	0.210873	MinorIsoform	1	151.248	566	411	reps	0.110298	0.138233	0.169215	0.247848
Chr8	144498840	144498915	PPP1R16A/ENSG00000160972.9/known-exon+anti-near+anti-over	0	+	13	4.47789e-05	4.47789e-05	0.999955	0.0589226	-	1	13.4615	215	208	0.183042	-	1	42.3462	189	183	reps	0.0182505	0.103774	0.196332	0.170033
Chr17	64503348	64503429	DDX5/ENSG00000108654.15/clean	0	-	10	4.48107e-05	4.48107e-05	0.999955	0.00933849	NonUniformIntronCover	1	33.3793	3541	3540	0.0205532	-	1	68.7241	3272	3272	reps	0.00909621	0.00986174	0.0282177	0.0113262
Chr8	143792133	143792219	SCRIB/ENSG00000180900.20/anti-near	0	-	10	4.54738e-05	4.54738e-05	0.999955	0.0076762	NonUniformIntronCover	1	5.5	711	707	0.0394406	-	1	28.9062	704	704	reps	0.0117096	0.00181785	0.0443557	0.0295203
ChrX	24809930	24810707	POLA1/ENSG00000101868.11/clean	0	+	10	4.57903e-05	0.999954	4.57903e-05	0.0273226	-	1	7.83713	279	279	0	-	0	0	584	584	reps	0.015691	0.0387859	0	0
Chr3	184302071	184302369	PSMD2/ENSG00000175166.17/clean	0	+	10	4.63887e-05	0.999954	4.63887e-05	0.0431514	-	1	77.7931	1594	1594	0.0196316	-	1	31.2586	1560	1560	reps	0.0309399	0.055566	0.0239942	0.0157372
Chr6	33279374	33279496	WDR46/ENSG00000227057.10/anti-over	0	-	10	4.72612e-05	4.72612e-05	0.999953	0.15374	-	1	74.8478	412	412	0.279024	-	1	97.913	253	253	reps	0.17422	0.13677	0.245381	0.36517
Chr19	16185516	16185623	FAM32A/ENSG00000105058.12/known-exon+anti-near	0	+	10	4.7352e-05	0.999953	4.7352e-05	0.164228	-	1	141.872	720	719	0.0924095	NonUniformIntronCover	1	63.0256	619	619	reps	0.150381	0.185554	0.0819655	0.117693
Chr9	133056094	133056765	GTF3C5/ENSG00000148308.17/clean	0	+	10	4.75121e-05	4.75121e-05	0.999952	0.0228969	NonUniformIntronCover	1	44.6642	1906	1905	0.0467444	-	1	82.9698	1692	1689	reps	0.0227021	0.0241511	0.0396966	0.0550333
Chr6	42966858	42967367	PEX6/ENSG00000124587.14/anti-near	0	-	10	4.7524e-05	0.999952	4.7524e-05	0.457401	-	1	34.5622	41	38	0.0944407	NonUniformIntronCover	1	5.52736	53	52	reps	0.467158	0.43807	0.138619	0.0530448
Chr10	75234743	75234937	COMTD1/ENSG00000165644.11/anti-near	0	-	10	4.75825e-05	0.999952	4.75825e-05	0.178192	-	1	81.3108	375	374	0.0895444	-	1	52.7162	536	536	reps	0.138147	0.256184	0.0772182	0.107674
Chr16	88806674	88807050	CDT1/ENSG00000167513.9/anti-near	0	+	10	4.80358e-05	4.80358e-05	0.999952	0.010698	NonUniformIntronCover	1	20.1351	1848	1846	0.0315775	-	1	32.0203	969	969	reps	0.0180805	0.00262858	0.0236308	0.0377035
Chr17	44853635	44854268	EFTUD2/ENSG00000108883.13/anti-near	0	-	10	4.80804e-05	4.80804e-05	0.999952	0.0109856	-	1	16.8725	1519	1519	0.03319	-	1	37.0757	1079	1078	reps	0.00849639	0.0131129	0.0221201	0.0498147
Chr10	100489761	100490007	SEC31B/ENSG00000075826.17/clean	0	-	10	4.82461e-05	0.999952	4.82461e-05	0.28827	-	1	86.2708	213	195	0.085164	NonUniformIntronCover	1	8.84375	95	91	reps	0.292626	0.283455	0.0716049	0.0992963
Chr11	64232614	64232703	DNAJC4/ENSG00000110011.13/anti-over	0	+	13	4.82509e-05	0.999952	4.82509e-05	0.104775	-	1	18.375	157	125	0.0167892	-	1	4.78125	280	237	reps	0.118481	0.0847458	0.00367069	0.027451
Chr16	23479887	23480644	GGA2/ENSG00000103365.15/clean	0	-	212	4.94155e-05	0.999951	4.94155e-05	0.069857	-	1	33.7215	449	378	0.0131559	NonUniformIntronCover	0.983486	4.63927	348	342	reps	0.0504136	0.0882532	0.00783499	0.0140375
Chr12	55823189	55823401	AC023055.1/ENSG00000257390.5/anti-near	0	-	12	4.9902e-05	0.99995	4.9902e-05	0.0639433	-	1	23.3625	341	341	0.0156152	NonUniformIntronCover	1	9.375	590	590	reps	0.0296905	0.104745	0.0169129	0.0151055
Chr2	54973198	54973562	RTN4/ENSG00000115310.18/anti-near	0	-	60	4.99317e-05	0.99995	4.99317e-05	0.0218844	-	1	12.082	540	537	0.00348367	NonUniformIntronCover	1	6.72951	1925	1922	reps	0.012435	0.0294478	0.00261156	0.00430761
Chr15	74842195	74842279	ULK3/ENSG00000140474.14/clean	0	-	10	5.07321e-05	0.999949	5.07321e-05	0.263804	-	1	70.2333	184	183	0.132332	-	1	59.6333	380	380	reps	0.258899	0.269841	0.163607	0.0943029
Chr5	178207225	178209329	HNRNPAB/ENSG00000197451.12/anti-over	0	+	465	5.16563e-05	5.16563e-05	0.999948	0.00341784	-	1	12.2298	3566	3558	0.0120127	-	1	28.0989	2311	2310	reps	0.00306514	0.00368261	0.012179	0.0120557
Chr17	40294056	40294363	CDC6/ENSG00000094804.12/clean	0	+	10	5.27342e-05	0.999947	5.27342e-05	0.0110939	-	1	15.8403	1403	1403	0	NonUniformIntronCover	0	0	1119	1119	reps	0.00292826	0.0181385	0	0
Chr2	218745233	218745690	TTLL4/ENSG00000135912.11/clean	0	+	10	5.29125e-05	0.999947	5.29125e-05	0.228517	-	1	28.7318	91	91	0.0662097	-	1	12.1955	171	171	reps	0.193694	0.264756	0.0749017	0.0571086
Chr12	6385147	6385226	LTBR/ENSG00000111321.11/clean	0	+	20	5.32126e-05	5.32126e-05	0.999947	0.0185132	-	1	10.28	545	543	0.0700961	-	1	24.8	329	328	reps	0.0223665	0.0143885	0.0831843	0.0571429
Chr3	25630469	25630800	TOP2B/ENSG00000077097.15/clean	0	-	10	5.383e-05	0.999946	5.383e-05	0.0482769	-	1	15.1163	298	277	0.00381618	NonUniformIntronCover	0.71028	1.64341	429	429	reps	0.0478656	0.0482703	0.00306485	0.00359712
Chr19	10796199	10798485	DNM2/ENSG00000079805.17/clean	0	+	159	5.4008e-05	0.999946	5.4008e-05	0.0655977	-	1	61.9189	692	691	0.0254381	-	1	19.8637	573	571	reps	0.069549	0.0605795	0.0282284	0.0218588
Chr16	88532709	88532788	ZFPM1/ENSG00000179588.9/clean	0	+	10	5.46568e-05	5.46568e-05	0.999945	0.0108696	-	0.811594	1	85	84	0.173223	-	1	16.5517	79	76	reps	0.0178571	0	0.181818	0.166444
Chr14	45114614	45114856	PRPF39/ENSG00000185246.18/anti-near	0	+	10	5.51578e-05	0.999945	5.51578e-05	0.164491	-	1	46.6596	237	237	0.0563039	-	1	14.3191	240	240	reps	0.12793	0.197083	0.0698877	0.0469978
Chr17	4891124	4891455	MINK1/ENSG00000141503.17/clean	0	+	10	5.51876e-05	0.999945	5.51876e-05	0.0941923	MinorIsoform	1	33.3798	321	239	0.0244455	-	1	8.94574	357	321	reps	0.105954	0.0845467	0.0298211	0.0187244
Chr19	45357543	45357629	ERCC2/ENSG00000104884.16/clean	0	-	10	5.56417e-05	0.999944	5.56417e-05	0.162374	-	1	36.25	187	187	0.0576217	-	1	22.5625	369	353	reps	0.132137	0.233023	0.0701403	0.0473282
Chr12	121331428	121335532	ANAPC5/ENSG00000089053.13/clean	0	-	10	5.59725e-05	0.999944	5.59725e-05	0.0515489	NonUniformIntronCover	1	45.3828	816	815	0.0198832	-	1	24.851	1212	1208	reps	0.0430266	0.0623047	0.0140388	0.0238795
Chr2	101269136	101269215	CNOT11/ENSG00000158435.8/known-exon+anti-near	0	+	10	5.61417e-05	0.999944	5.61417e-05	0.148781	-	1	94.0345	533	533	0.0796376	-	1	60.3103	688	688	reps	0.155536	0.136905	0.095255	0.0705265
Chr16	2974656	2975318	PKMYT1/ENSG00000127564.17/anti-near	0	-	10	5.66624e-05	0.999943	5.66624e-05	0.25032	-	1	337.908	998	997	0.167996	NonUniformIntronCover	1	121.958	603	601	reps	0.250521	0.242328	0.155438	0.187088
Chr6	33686253	33686408	ITPR3/ENSG00000096433.11/clean	0	+	10	5.69745e-05	0.999943	5.69745e-05	0.118416	-	1	21.4915	160	148	0.0142559	NonUniformIntronCover	0.924138	2.66102	184	182	reps	0.124027	0.110553	0.0215054	0.00728799
Chr21	46443948	46444693	PCNT/ENSG00000160299.17/clean	0	+	10	5.72057e-05	0.999943	5.72057e-05	0.493098	NonUniformIntronCover	1	172.18	162	162	0.313155	-	1	119.454	253	253	reps	0.474561	0.520705	0.295733	0.341169
Chr2	61189069	61190270	USP34/ENSG00000115464.15/known-exon+anti-near+anti-over	0	-	119	5.74241e-05	5.74241e-05	0.999943	0.0817591	-	1	29.9171	336	335	0.187812	-	1	60.5853	262	257	reps	0.0802256	0.080859	0.173116	0.187995
Chr1	150966288	150966475	CERS2/ENSG00000143418.19/anti-near	0	-	10	5.81935e-05	5.81935e-05	0.999942	0.00259082	NonUniformIntronCover	1	4.43662	1708	1707	0.0153029	-	1	18.338	1180	1176	reps	0.00270185	0.00243605	0.00950458	0.0218478
Chr14	104756760	104759427	SIVA1/ENSG00000184990.13/anti-near	0	+	729	5.86738e-05	0.999941	5.86738e-05	0.0958763	-	1	77.6237	732	660	0.0503592	-	1	63.9008	1205	1187	reps	0.0792793	0.128751	0.0456199	0.0573377
Chr4	112646955	112647033	LARP7/ENSG00000174720.16/anti-over	0	+	23	5.89042e-05	0.999941	5.89042e-05	0.11036	-	1	17.7391	143	137	0.02772	NonUniformIntronCover	1	12.1739	427	424	reps	0.105882	0.115385	0.0400304	0.0159157
Chr11	10800647	10800730	EIF4G2/ENSG00000110321.18/anti-over	0	-	10	5.9496e-05	5.9496e-05	0.999941	0.0122542	-	1	84.7097	6819	6819	0.0208693	-	1	135.387	6344	6344	reps	0.0163346	0.00962612	0.026627	0.0168169
Chr7	2366591	2366998	EIF3B/ENSG00000106263.18/clean	0	+	10	5.97761e-05	0.99994	5.97761e-05	0.0364575	NonUniformIntronCover	1	30.6101	809	792	0.0133758	-	1	27.7107	2044	2036	reps	0.0290659	0.0493012	0.0143802	0.0112056
Chr11	533944	534211	HRAS/ENSG00000174775.17/anti-near	0	-	42	6.03833e-05	6.03833e-05	0.99994	0.0292885	-	1	33.0989	1097	1023	0.066696	-	1	58.3846	817	782	reps	0.0360137	0.0213239	0.0674017	0.0678864
Chr11	66694363	66696276	SPTBN2/ENSG00000173898.13/clean	0	-	10	6.09996e-05	0.999939	6.09996e-05	0.0702948	-	1	8.54391	112	112	0.00545736	NonUniformIntronCover	0.800841	1.49803	273	273	reps	0.055765	0.0887285	0.00341234	0.00400657
Chr16	2094013	2094091	PKD1/ENSG00000008710.20/anti-over	0	-	10	6.18228e-05	6.18228e-05	0.999938	0.0255885	NonUniformIntronCover	1	7.14286	272	267	0.108044	-	1	29.0714	239	239	reps	0.021489	0.0275344	0.155813	0.0501475
Chr12	57614119	57614330	ARHGEF25/ENSG00000240771.8/anti-over	0	+	10	6.23129e-05	0.999938	6.23129e-05	0.0766701	-	1	17.2716	185	185	0.0153345	NonUniformIntronCover	1	7.14815	439	439	reps	0.0670506	0.0889845	0.0112327	0.0199203
Chr17	7220529	7220603	ACADVL/ENSG00000072778.20/anti-near	0	+	10	6.30547e-05	6.30547e-05	0.999937	0.207067	MinorIsoform	1	212.308	605	604	0.308995	-	1	162.769	320	320	reps	0.23341	0.18456	0.290977	0.328857
Chr1	173828399	173830659	DARS2/ENSG00000117593.12/clean	0	+	10	6.39693e-05	0.999936	6.39693e-05	0.0353287	NonUniformIntronCover	1	9.22889	252	248	0.00171821	-	0.782667	1	581	573	reps	0.0106535	0.0742857	0.00172401	0.00118642
Chr16	666792	666904	WDR90/ENSG00000161996.19/clean	0	+	10	6.42375e-05	0.999936	6.42375e-05	0.295088	-	1	97.119	232	196	0.163536	-	1	72.1429	369	308	reps	0.308117	0.264448	0.139679	0.199485
Chr16	67946082	67946170	SLC12A4/ENSG00000124067.17/clean	0	-	10	6.43386e-05	0.999936	6.43386e-05	0.150912	-	1	11.375	64	64	0.0129032	-	1	2	153	153	reps	0.236842	0.0781893	0.0235294	0.000914913
Chr3	53229436	53230456	TKT/ENSG00000163931.16/clean	0	-	10	6.43689e-05	0.999936	6.43689e-05	0.0778482	-	1	113.376	1342	1342	0.0461579	NonUniformIntronCover	1	103.171	2131	2131	reps	0.0517608	0.112042	0.050711	0.0405994
Chr6	130878250	130880143	EPB41L2/ENSG00000079819.19/clean	0	-	10	6.48882e-05	0.999935	6.48882e-05	0.134643	-	1	54.302	349	343	0.0582301	NonUniformIntronCover	1	33.6358	544	543	reps	0.107217	0.171469	0.0476791	0.06755
Chr10	73797271	73797376	ZSWIM8/ENSG00000214655.10/known-exon+anti-near+anti-over	0	+	10	6.5102e-05	6.5102e-05	0.999935	0.146138	-	1	55.7949	326	326	0.295011	-	1	62.7692	150	150	reps	0.175108	0.124859	0.276748	0.319834
Chr19	54108726	54108827	NDUFA3/ENSG00000170906.16/anti-over	0	+	10	6.51193e-05	6.51193e-05	0.999935	0.0318821	NonUniformIntronCover	1	3.91892	117	116	0.224793	-	1	13.9189	48	48	reps	0.010674	0.0467697	0.178571	0.264706
Chr16	67197646	67197866	E2F4/ENSG00000205250.9/clean	0	+	10	6.52309e-05	0.999935	6.52309e-05	0.0613185	-	1	35.7976	548	542	0.0216385	NonUniformIntronCover	1	18.3571	830	827	reps	0.0560364	0.0644805	0.0237533	0.0173867
Chr16	31189226	31189664	FUS/ENSG00000089280.19/clean	0	+	10	6.59481e-05	0.999934	6.59481e-05	0.0111886	-	1	85.8256	7582	7580	0.00578161	-	1	52.7326	9063	9062	reps	0.00904682	0.0139623	0.00489324	0.0068491
Chr5	146140261	146142871	LARS1/ENSG00000133706.19/anti-near	0	-	26	6.61671e-05	0.999934	6.61671e-05	0.205837	-	1	104.453	403	303	0.106257	NonUniformIntronCover	1	47.5561	400	392	reps	0.185348	0.224072	0.104267	0.107644
Chr1	229465519	229466633	NUP133/ENSG00000069248.12/clean	0	-	10	6.63519e-05	0.999934	6.63519e-05	0.0282298	NonUniformIntronCover	1	21.6131	729	720	0.00316456	-	0.887681	2	629	629	reps	0.0124103	0.0490967	0.00102097	0.00451065
Chr11	65920462	65920568	DRAP1/ENSG00000175550.8/clean	0	+	31	6.64421e-05	0.999934	6.64421e-05	0.0227356	-	1	44.2258	1901	1889	0.00620554	NonUniformIntronCover	1	8.16129	1307	1294	reps	0.0135314	0.0320408	0.00720335	0.00311526
Chr9	35075082	35075278	FANCG/ENSG00000221829.10/clean	0	-	10	6.68229e-05	0.999933	6.68229e-05	0.399817	-	1	80.6053	102	102	0.200094	-	1	45.0263	169	169	reps	0.360038	0.447391	0.216219	0.181552
Chr12	57517753	57520417	AC022506.1/ENSG00000285133.1/anti-near	0	-	117	6.76076e-05	6.76076e-05	0.999932	0.0196575	NonUniformIntronCover	1	16.3621	816	810	0.0663752	-	1	20.6173	290	287	reps	0.024108	0.0170596	0.0790566	0.0501374
Chr6	52272451	52273229	MCM3/ENSG00000112118.20/clean	0	-	10	6.90137e-05	0.999931	6.90137e-05	0.0437277	-	1	70.7857	1548	1538	0.0207404	NonUniformIntronCover	1	37.1916	1756	1753	reps	0.0278376	0.0708141	0.0174996	0.0217349
Chr11	67301398	67301487	ANKRD13D/ENSG00000172932.16/clean	0	+	10	6.9544e-05	6.9544e-05	0.99993	0.100411	-	1	22.2121	199	193	0.236655	-	1	76.5758	247	245	reps	0.113636	0.0773906	0.258561	0.21459
Chr6	33195050	33195362	RXRB/ENSG00000204231.10/clean	0	-	10	6.96951e-05	0.99993	6.96951e-05	0.200082	-	1	72.2869	289	235	0.0971982	-	1	42.3115	393	370	reps	0.177517	0.233405	0.0775204	0.122302
Chr17	29478347	29480367	TAOK1/ENSG00000160551.11/clean	0	+	10	6.97674e-05	0.99993	6.97674e-05	0.12987	NonUniformIntronCover	1	13.1343	82	82	0.01	-	0.861692	1.33333	127	127	reps	0.078533	0.139044	0.0033416	0.0126799
Chr16	2097241	2097318	PKD1/ENSG00000008710.20/anti-near	0	-	10	7.02525e-05	0.99993	7.02525e-05	0.503545	MinorIsoform	1	168.37	166	32	0.319258	-	1	115.37	246	190	reps	0.434411	0.585526	0.306791	0.337724
Chr16	46695674	46696016	ORC6/ENSG00000091651.9/clean	0	+	10	7.04681e-05	7.04681e-05	0.99993	0.0439648	NonUniformIntronCover	1	36.0075	783	767	0.0962469	-	1	63.3657	595	587	reps	0.0445213	0.0435763	0.0763561	0.109415
Chr11	499185	499828	RNH1/ENSG00000023191.17/clean	0	-	120	7.19351e-05	7.19351e-05	0.999928	0.0230754	-	1	38.1943	1616	1610	0.049083	-	1	62.5592	1210	1210	reps	0.0225413	0.024779	0.0492795	0.0499258
Chr6	42969801	42969884	PEX6/ENSG00000124587.14/clean	0	-	10	7.37521e-05	0.999926	7.37521e-05	0.469227	-	1	32.7097	37	36	0.123354	-	1	8.16129	57	57	reps	0.546472	0.38	0.155642	0.0909091
Chr1	11999095	12001400	MFN2/ENSG00000116688.17/clean	0	+	10	7.62008e-05	0.999924	7.62008e-05	0.11719	-	1	42.2133	303	303	0.0469033	-	0.943791	27.9521	553	553	reps	0.103816	0.120267	0.0471205	0.0439578
Chr13	37006025	37006114	EXOSC8/ENSG00000120699.13/anti-near	0	+	10	7.77006e-05	0.999922	7.77006e-05	0.0514857	-	1	27.303	503	489	0.0122403	-	1	7.21212	580	580	reps	0.0369128	0.0689655	0.00993377	0.0146655
Chr16	46693182	46695561	ORC6/ENSG00000091651.9/clean	0	+	648	7.82561e-05	7.82561e-05	0.999922	0.0606504	-	1	43.7114	677	662	0.124643	NonUniformIntronCover	1	71.0534	494	484	reps	0.0671022	0.0552369	0.133642	0.106814
Chr19	39458305	39458817	SUPT5H/ENSG00000196235.14/clean	0	+	10	7.84263e-05	0.999922	7.84263e-05	0.0596565	-	1	67.9455	906	906	0.0219089	NonUniformIntronCover	1	14.9406	641	641	reps	0.0391211	0.0821051	0.0199534	0.0253925
Chr16	2975812	2976663	PKMYT1/ENSG00000127564.17/anti-near	0	-	128	7.92272e-05	0.999921	7.92272e-05	0.0628274	-	1	99.1512	1479	1435	0.0279264	-	1	24.0172	836	831	reps	0.0646366	0.0633541	0.0254242	0.0256122
Chr6	170285699	170286237	DLL1/ENSG00000198719.9/clean	0	-	10	7.97548e-05	7.97548e-05	0.99992	0.094715	-	1	26.6792	255	254	0.265903	-	1	29.3396	81	81	reps	0.150445	0.0805045	0.274186	0.266326
Chr5	176531630	176532003	RNF44/ENSG00000146083.12/clean	0	-	10	7.99998e-05	0.99992	7.99998e-05	0.260477	-	1	36.2789	103	101	0.0945989	NonUniformIntronCover	1	20.3741	192	188	reps	0.252633	0.265181	0.0996186	0.0873387
Chr15	89303915	89305114	FANCI/ENSG00000140525.18/anti-near	0	+	10	8.08777e-05	0.999919	8.08777e-05	0.0347233	-	1	22.8784	636	633	0.00701806	NonUniformIntronCover	1	5.21593	738	738	reps	0.0201574	0.0554392	0.00827105	0.00533067
Chr2	218689956	218690449	STK36/ENSG00000163482.12/clean	0	+	10	8.197e-05	0.999918	8.197e-05	0.146105	-	1	8.89744	50	50	0.00771128	NonUniformIntronCover	0.600414	1.01026	130	129	reps	0.130596	0.166667	0.00652664	0.00724657
Chr14	23477356	23477502	NGDN/ENSG00000129460.16/clean	0	+	10	8.26869e-05	8.26869e-05	0.999917	0.0244361	NonUniformIntronCover	1	13	519	518	0.0871615	-	1	23.1071	242	241	reps	0.040551	0.0147892	0.0650685	0.12722
Chr12	56247610	56247686	ANKRD52/ENSG00000139645.10/clean	0	-	10	8.31724e-05	0.999917	8.31724e-05	0.113994	-	1	30.75	239	236	0.0387324	-	1	17.2857	429	429	reps	0.110596	0.12069	0.0586924	0.023622
Chr16	791948	792223	CHTF18/ENSG00000127586.17/clean	0	+	10	8.32182e-05	0.999917	8.32182e-05	0.698452	-	1	604.533	220	220	0.556096	-	1	493.579	331	328	reps	0.702011	0.686217	0.574496	0.523505
Chr14	94053127	94054995	DDX24/ENSG00000089737.17/anti-near	0	-	100	8.41001e-05	0.999916	8.41001e-05	0.0235207	-	0.98586	25.9901	1079	1063	0.00486945	NonUniformIntronCover	0.836538	5.71045	1167	1167	reps	0.0243799	0.0225858	0.00661271	0.00253682
Chr8	144260057	144260185	MROH1/ENSG00000179832.17/anti-near	0	+	10	8.49567e-05	0.999915	8.49567e-05	0.34439	-	1	36.7708	70	70	0.0515304	NonUniformIntronCover	0.838983	2.77083	51	51	reps	0.224954	0.477387	0.0845518	0
Chr19	12658344	12658427	MAN2B1/ENSG00000104774.13/clean	0	-	10	8.56999e-05	0.999914	8.56999e-05	0.0928355	-	1	14.8387	145	137	0.0164208	-	1	5.70968	342	337	reps	0.0788114	0.101695	0.0195349	0.0143541
Chr1	11658393	11658532	FBXO44/ENSG00000132879.14/clean	0	+	10	8.63355e-05	8.63355e-05	0.999914	0.243426	-	1	24.4528	76	73	0.558004	-	1	70.6981	55	53	reps	0.296849	0.132671	0.503175	0.603339
Chr12	53276859	53277082	ESPL1/ENSG00000135476.12/clean	0	+	10	8.66176e-05	0.999913	8.66176e-05	0.0647482	-	1	9	130	127	0.00337838	-	1	1	295	295	reps	0.058776	0.0792878	0	0.00621118
Chr6	36601794	36601961	SRSF3/ENSG00000112081.17/clean	0	+	10	8.67265e-05	0.999913	8.67265e-05	0.0111678	-	1	35.5873	3151	3141	0.00386724	-	1	17.5556	4522	4522	reps	0.0133948	0.00758129	0.00456135	0.00353923
Chr8	42349090	42350006	POLB/ENSG00000070501.12/clean	0	+	90	8.67909e-05	0.999913	8.67909e-05	0.0442167	NonUniformIntronCover	1	13.7861	298	292	0.0011063	-	0.299031	0	270	264	reps	0.0329175	0.0555544	0	0.00240574
Chr14	70584943	70585755	MED6/ENSG00000133997.11/clean	0	-	10	8.70398e-05	0.999913	8.70398e-05	0.0540696	-	1	24.5217	429	414	0.0102409	NonUniformIntronCover	0.982544	4.21118	407	399	reps	0.0448049	0.0668716	0.00891685	0.0122102
ChrX	101276112	101276306	TAF7L/ENSG00000102387.15/clean	0	-	10	8.75258e-05	8.75258e-05	0.999912	0.0378503	NonUniformIntronCover	1	7.08108	180	143	0.15802	-	1	26.8378	143	130	reps	0.0305254	0.0366151	0.0651997	0.298578
Chr1	156562001	156562586	IQGAP3/ENSG00000183856.11/clean	0	-	10	8.78061e-05	0.999912	8.78061e-05	0.421664	-	1	60.5152	83	72	0.179498	NonUniformIntronCover	1	24.9394	114	113	reps	0.400778	0.438689	0.230418	0.156718
Chr11	66687167	66687426	SPTBN2/ENSG00000173898.13/clean	0	-	10	8.82464e-05	0.999912	8.82464e-05	0.0872058	-	1	12.802	134	133	0.00776491	-	0.879518	1.79208	229	227	reps	0.056784	0.143759	0.010101	0.00466862
Chr16	89722834	89723136	ZNF276/ENSG00000158805.12/clean	0	+	10	9.10829e-05	0.999909	9.10829e-05	0.289727	-	1	30.5932	75	71	0.077095	NonUniformIntronCover	1	8.18644	98	98	reps	0.272455	0.301013	0.0793868	0.0754825
Chr1	201874372	201874831	IPO9/ENSG00000198700.10/clean	0	+	10	9.12819e-05	0.999909	9.12819e-05	0.176765	-	1	76.011	354	335	0.0863156	NonUniformIntronCover	1	39.1105	414	403	reps	0.135576	0.228048	0.074658	0.0934183
Chr16	67659613	67659701	ACD/ENSG00000102977.17/anti-near	0	-	10	9.16326e-05	0.999908	9.16326e-05	0.141622	-	1	34.8125	211	205	0.0494259	-	1	18.5625	357	347	reps	0.140187	0.147281	0.051541	0.0507246
Chr19	1090145	1090907	POLR2E/ENSG00000099817.12/anti-near	0	-	10	9.27567e-05	0.999907	9.27567e-05	0.0114417	-	1	21.3311	1843	1661	0.00212597	NonUniformIntronCover	0.894947	4.94702	2318	2304	reps	0.00957673	0.0148656	0.00273084	0.00107464
Chr6	31629845	31630590	PRRC2A/ENSG00000204469.13/clean	0	+	10	9.41162e-05	0.999906	9.41162e-05	0.0489997	-	1	67.0847	1287	1279	0.0221679	NonUniformIntronCover	1	30.061	1318	1317	reps	0.0363065	0.060648	0.0146564	0.0307046
Chr12	56163765	56164302	SMARCC2/ENSG00000139613.12/anti-near	0	-	10	9.46386e-05	0.999905	9.46386e-05	0.0889617	-	1	80.8531	828	709	0.0442832	-	1	42.5355	918	769	reps	0.0799862	0.106517	0.0266173	0.0633123
Chr8	144424268	144424717	VPS28/ENSG00000160948.14/known-exon	0	-	10	9.47341e-05	0.999905	9.47341e-05	0.139259	-	1	95.2938	589	583	0.0771244	-	1	65.435	783	779	reps	0.129886	0.156621	0.101294	0.0483491
Chr2	27383600	27383951	PPM1G/ENSG00000115241.11/clean	0	-	10	9.50693e-05	0.999905	9.50693e-05	0.0304001	-	1	46.2774	1418	1418	0.0119012	NonUniformIntronCover	1	22.0657	1819	1819	reps	0.0284369	0.033889	0.0153695	0.00693654
Chr6	2948699	2948913	SERPINB6/ENSG00000124570.21/clean	0	-	10	9.51206e-05	0.999905	9.51206e-05	0.0511351	-	1	16.9756	315	315	0.00952535	NonUniformIntronCover	1	5.73171	596	596	reps	0.0414747	0.0711412	0.00666667	0.0127268
Chr17	40035349	40035721	MED24/ENSG00000008838.20/clean	0	-	10	9.56997e-05	0.999904	9.56997e-05	0.0252938	-	1	20.2671	781	778	0.00170358	NonUniformIntronCover	0.762431	1	586	585	reps	0.0172373	0.0341617	0.00333333	0
Chr4	1024664	1024904	FGFRL1/ENSG00000127418.15/clean	0	+	10	9.73916e-05	9.73916e-05	0.999903	0.0464709	-	1	16.4239	333	333	0.129526	-	1	41.2174	264	264	reps	0.049599	0.0425733	0.160451	0.107598
Chr1	117081947	117084017	TTF2/ENSG00000116830.12/clean	0	+	70	9.80801e-05	0.999902	9.80801e-05	0.160162	NonUniformIntronCover	1	28.0338	147	135	0.0510543	-	1	14.4725	269	261	reps	0.10212	0.210786	0.0631158	0.0463324
Chr1	70221839	70228421	SRSF11/ENSG00000116754.13/anti-near	0	+	53	9.99793e-05	9.99793e-05	0.9999	0.0394826	NonUniformIntronCover	1	52.6973	1282	1261	0.0740106	-	1	95.8312	1183	1175	reps	0.0307455	0.0466112	0.0513414	0.0991062
Chr11	532522	532630	HRAS/ENSG00000174775.17/known-exon+anti-near	0	-	10	0.000100263	0.9999	0.000100263	0.364315	-	1	545.025	949	945	0.286191	-	1	417.775	1042	1040	reps	0.35382	0.373865	0.318616	0.258986
Chr11	119132781	119132863	HINFP/ENSG00000172273.13/clean	0	+	10	0.000102493	0.000102493	0.999898	0	-	0	0	184	183	0.070922	NonUniformIntronCover	1	10	130	129	reps	0	0	0.0555556	0.0804598
Chr14	94100771	94101813	IFI27L1/ENSG00000165948.11/clean	0	+	10	0.000102752	0.000102752	0.999897	0.163891	-	1	50.7681	259	217	0.329444	-	1	62.8865	128	112	reps	0.13785	0.22769	0.246359	0.438555
Chr2	130153935	130154276	SMPD4/ENSG00000136699.19/clean	0	-	10	0.000103327	0.999897	0.000103327	0.0918702	-	1	97.4211	963	910	0.0474186	-	1	43.9549	883	867	reps	0.100542	0.0844613	0.0414414	0.0526755
Chr5	113564131	113565892	YTHDC2/ENSG00000047188.16/clean	0	+	10	0.0001034	0.999897	0.0001034	0.216425	-	1	24.582	79	77	0.0610739	NonUniformIntronCover	1	10.9929	169	166	reps	0.180099	0.268464	0.0414169	0.071536
Chr5	34811118	34811766	RAI14/ENSG00000039560.14/clean	0	+	10	0.000104858	0.999895	0.000104858	0.0467054	NonUniformIntronCover	1	8.67188	171	171	0.00112793	-	0.315047	0.0390625	279	279	reps	0.048729	0.0428901	0	0.00199
Chr2	27368733	27369005	EIF2B4/ENSG00000115211.16/anti-near	0	-	10	0.000105345	0.000105345	0.999895	0.00696775	NonUniformIntronCover	1	3.09434	441	430	0.0460279	-	1	19.8302	409	409	reps	0.00773937	0.00765957	0.0265394	0.0676419
Chr6	87520256	87521463	RARS2/ENSG00000146282.18/clean	0	-	10	0.000105633	0.999894	0.000105633	0.0471465	-	1	17.5157	337	337	0.00401885	NonUniformIntronCover	0.843776	1.50104	347	347	reps	0.032729	0.0618493	0.00279085	0.00326572
Chr12	122489463	122490461	ZCCHC8/ENSG00000033030.15/clean	0	-	10	0.000105811	0.999894	0.000105811	0.0808511	-	1	14.25	162	125	0.00697831	NonUniformIntronCover	0.675101	1.39141	198	197	reps	0.0657467	0.0887711	0.0148987	0.000524894
Chr7	95407068	95409900	PON2/ENSG00000105854.13/clean	0	-	10	0.000107693	0.999892	0.000107693	0.125126	NonUniformIntronCover	1	38.1867	261	261	0.0403574	-	1	13.5416	318	318	reps	0.104703	0.140389	0.0278212	0.045613
Chr7	151240247	151240424	SMARCD3/ENSG00000082014.16/anti-near	0	-	36	0.000107936	0.000107936	0.999892	0.131776	-	1	36.1228	231	231	0.265104	-	1	93.0702	247	245	reps	0.124641	0.139662	0.24409	0.286608
Chr2	24828161	24830708	ADCY3/ENSG00000138031.14/clean	0	-	60	0.000108133	0.999892	0.000108133	0.257898	NonUniformIntronCover	1	84.796	187	187	0.134813	-	1	49.8623	289	289	reps	0.2233	0.303394	0.13897	0.119706
Chr9	136839121	136839221	RABL6/ENSG00000196642.19/clean	0	+	10	0.000108899	0.999891	0.000108899	0.019624	-	1	35.75	1786	1721	0.0066421	NonUniformIntronCover	1	14.2222	2127	2087	reps	0.021455	0.0174956	0.00757576	0.00588407
Chr16	30365212	30365494	TBC1D10B/ENSG00000169221.14/clean	0	-	10	0.000109432	0.999891	0.000109432	0.129149	-	1	24.6182	166	151	0.0402381	NonUniformIntronCover	1	14.2545	340	337	reps	0.11312	0.160879	0.0463243	0.033054
Chr5	177440837	177440918	GRK6/ENSG00000198055.11/anti-over	0	+	10	0.000110572	0.999889	0.000110572	0.0631991	-	1	27.8621	413	408	0.0170455	-	1	9	519	510	reps	0.0602225	0.0698503	0.0290909	0.00395257
Chr11	119027872	119028193	SLC37A4/ENSG00000137700.18/anti-near	0	-	10	0.000112015	0.000112015	0.999888	0.0814581	-	1	27.048	281	281	0.178792	-	1	79.032	346	346	reps	0.0758373	0.0897645	0.184449	0.170221
Chr3	51983589	51984046	ACY1/ENSG00000243989.9/anti-near	0	+	10	0.000113602	0.999886	0.000113602	0.197789	NonUniformIntronCover	1	11.095	44	44	0.0350404	-	1	6.46369	174	174	reps	0.080438	0.5	0.0520886	0.000576992
Chr16	681350	681437	STUB1/ENSG00000103266.11/anti-near	0	+	10	0.00011391	0.999886	0.00011391	0.031334	-	1	81.6129	2516	2516	0.0155794	-	1	39.5806	2501	2501	reps	0.0205901	0.0528857	0.0181024	0.0114089
Chr12	48837037	48837280	DDX23/ENSG00000174243.10/clean	0	-	10	0.000114112	0.999886	0.000114112	0.026796	-	1	19.6316	713	703	0.00546056	NonUniformIntronCover	1	5.21053	949	949	reps	0.0273505	0.0252404	0.00702475	0.0034346
Chr17	7224393	7224479	ACADVL/ENSG00000072778.20/anti-near	0	+	10	0.000114601	0.000114601	0.999885	0.0239514	NonUniformIntronCover	1	30.2812	1234	1114	0.0589729	-	1	34.8438	556	494	reps	0.0176979	0.031948	0.0521485	0.0693098
Chr20	58993112	58993448	NELFCD/ENSG00000101158.15/anti-near	0	+	10	0.00011471	0.00011471	0.999885	0.0181801	-	1	34.6818	1873	1852	0.0405309	NonUniformIntronCover	1	51.9167	1229	1220	reps	0.0216383	0.0144784	0.0439418	0.0360384
Chr22	50581862	50582248	CHKB/ENSG00000100288.20/anti-near	0	-	87	0.000114896	0.000114896	0.999885	0.374395	-	1	75.405	120	118	0.604747	-	1	206.554	131	127	reps	0.441345	0.229032	0.650598	0.560962
Chr14	105464567	105464673	MTA1/ENSG00000182979.18/anti-near	0	+	10	0.000117258	0.000117258	0.999883	0.0315692	-	1	34	1043	1043	0.0695326	-	1	55.075	737	737	reps	0.0349067	0.0273179	0.0940471	0.0422164
Chr17	61984367	61984650	MED13/ENSG00000108510.10/clean	0	-	10	0.000117745	0.999882	0.000117745	0.11121	MinorIsoform	1	6.75676	54	40	0	-	0	0	128	128	reps	0.189358	0.0776901	0	0
Chr10	119933167	119933685	SEC23IP/ENSG00000107651.13/clean	0	+	10	0.000117883	0.999882	0.000117883	0.0679152	-	1	17.7059	241	239	0.0148303	NonUniformIntronCover	1	6.36765	423	423	reps	0.0352438	0.101152	0.0114928	0.0174261
Chr20	63521363	63521511	PPDPF/ENSG00000125534.10/known-exon	0	+	10	0.000119146	0.000119146	0.999881	0.0203821	-	1	63.875	2891	2891	0.0356007	-	1	121.893	2911	2911	reps	0.0174961	0.0247663	0.0501612	0.0250438
Chr11	66689943	66690038	SPTBN2/ENSG00000173898.13/clean	0	-	10	0.000123848	0.999876	0.000123848	0.105994	NonUniformIntronCover	1	15.0571	127	127	0.0137457	-	1	2.85714	205	205	reps	0.110577	0.106455	0.00869565	0.0245023
Chr15	88909923	88913246	MFGE8/ENSG00000140545.15/anti-near	0	-	73	0.000126587	0.000126587	0.999873	0.00562138	-	0.993538	4.77692	777	771	0.030259	NonUniformIntronCover	1	19.97	640	604	reps	0.0066503	0.00383142	0.0291926	0.0309168
Chr16	30353800	30353900	CD2BP2/ENSG00000169217.9/clean	0	-	10	0.000126834	0.999873	0.000126834	0.0429448	-	1	28.5833	637	632	0.0107692	-	1	7	643	640	reps	0.0360301	0.050536	0.0109018	0.00956938
Chr17	40411455	40411644	TOP2A/ENSG00000131747.15/clean	0	-	10	0.000128396	0.999872	0.000128396	0.023581	-	1	25.5753	1059	1059	0.00669417	NonUniformIntronCover	1	10.0685	1494	1494	reps	0.0161072	0.0303058	0.0056926	0.00722047
Chr17	42582270	42582673	RETREG3/ENSG00000141699.11/clean	0	-	10	0.000129396	0.999871	0.000129396	0.0847259	-	1	9.53459	102	102	0.000483585	NonUniformIntronCover	0.0687023	0	142	142	reps	0.0525018	0.124556	0.000151889	0.000915192
Chr11	45904161	45904454	MAPK8IP1/ENSG00000121653.11/anti-near	0	+	10	0.000129851	0.99987	0.000129851	0.166034	-	1	20.9043	105	104	0.0323814	NonUniformIntronCover	1	4.41739	132	128	reps	0.0952152	0.21645	0.0704765	0.00459598
Chr15	41824061	41824483	MAPKBP1/ENSG00000137802.14/anti-near	0	+	10	0.000130193	0.99987	0.000130193	0.336228	-	1	17.7289	30	30	0.0385729	NonUniformIntronCover	0.759709	2.00602	50	50	reps	0.335033	0.356013	0.0241592	0.0172693
Chr2	98616346	98616431	UNC50/ENSG00000115446.11/anti-near	0	+	10	0.0001303	0.0001303	0.99987	0.0343987	NonUniformIntronCover	1	12.2903	345	335	0.107108	-	1	35.3871	285	283	reps	0.0323759	0.0368098	0.0910202	0.120939
ChrX	55751196	55753391	RRAGB/ENSG00000083750.12/clean	0	+	437	0.00013122	0.00013122	0.999869	0.0128645	-	0.875995	2.46307	185	172	0.107932	MinorIsoform	1	9.55824	79	46	reps	0.0121951	0.0118785	0.0925642	0.109484
Chr6	42968498	42968873	PEX6/ENSG00000124587.14/anti-near	0	-	10	0.000131865	0.999868	0.000131865	0.542843	-	1	45.1224	38	35	0.180004	NonUniformIntronCover	1	11.415	52	49	reps	0.620373	0.457665	0.281369	0.0384615
Chr2	28946499	28946599	WDR43/ENSG00000163811.12/clean	0	+	10	0.000131866	0.999868	0.000131866	0.056366	-	1	46.4722	778	776	0.0198351	-	1	14.8333	733	732	reps	0.0223547	0.0744973	0.0209581	0.0138351
Chr15	40628208	40628610	KNL1/ENSG00000137812.20/clean	0	+	10	0.000132543	0.999867	0.000132543	0.0937104	-	1	8.89241	76	76	0	-	0	0	137	135	reps	0.0310051	0.13746	0	0
Chr5	154794000	154794099	LARP1/ENSG00000155506.17/clean	0	+	10	0.000133622	0.000133622	0.999866	0.0245505	-	1	8.78378	273	273	0.0858369	MinorIsoform	1	40	295	295	reps	0.0240964	0.0252184	0.0902818	0.0871363
Chr1	155737063	155738156	DAP3/ENSG00000132676.16/clean	0	+	10	0.000133809	0.999866	0.000133809	0.0275329	-	1	34.6828	1140	1140	0.00777843	NonUniformIntronCover	1	8.81149	1119	1116	reps	0.025752	0.0302154	0.00987282	0.00612915
Chr17	80337726	80337832	RNF213/ENSG00000173821.19/clean	0	+	10	0.000134855	0.999865	0.000134855	0.409836	NonUniformIntronCover	1	6.25	9	9	0.0181818	-	1	1	54	54	reps	0.233227	0.59596	0.0344828	0
Chr17	61984865	61984999	MED13/ENSG00000108510.10/clean	0	-	10	0.000137811	0.999862	0.000137811	0.111111	MinorIsoform	1	5	40	24	0	-	0	0	153	153	reps	0.0983607	0.107143	0	0
Chr10	95693476	95693643	TCTN3/ENSG00000119977.21/clean	0	-	10	0.000139447	0.999861	0.000139447	0.0753693	NonUniformIntronCover	1	24.6984	303	303	0.0211053	-	1	10.6508	494	494	reps	0.0607798	0.094206	0.0120771	0.0294339
Chr9	35075754	35075961	FANCG/ENSG00000221829.10/clean	0	-	10	0.000140878	0.999859	0.000140878	0.510979	MinorIsoform	1	55.3797	47	31	0.231847	-	1	32.8987	101	97	reps	0.425894	0.612633	0.224268	0.238589
Chr11	17145942	17147516	PIK3C2A/ENSG00000011405.13/clean	0	-	10	0.000140997	0.999859	0.000140997	0.102831	-	1	7.79393	68	52	0.00807263	-	0.810102	1.80671	222	222	reps	0.140378	0.0717854	0.00828487	0.00351735
Chr8	42402015	42403310	VDAC3/ENSG00000078668.14/clean	0	+	10	0.000142958	0.000142958	0.999857	0.00878612	-	1	11.9398	1346	1346	0.0264603	-	1	42.7262	1571	1571	reps	0.00630226	0.0105094	0.0240917	0.0283849
Chr6	42968985	42969667	PEX6/ENSG00000124587.14/clean	0	-	10	0.000143077	0.999857	0.000143077	0.543754	-	1	50.0556	39	39	0.178295	-	1	11.5	49	49	reps	0.452021	0.629061	0.223935	0.131112
Chr9	128353234	128353414	SLC27A4/ENSG00000167114.13/clean	0	+	10	0.000143579	0.000143579	0.999856	0.0308016	-	1	9.47059	270	264	0.101222	-	1	35.9265	314	311	reps	0.0377358	0.030238	0.111904	0.083449
Chr19	49468566	49468863	ALDH16A1/ENSG00000161618.10/clean	0	+	10	0.000145349	0.999855	0.000145349	0.0875492	-	1	11.2261	112	112	0.0125351	NonUniformIntronCover	1	4.58261	358	358	reps	0.0960272	0.0737966	0.0121066	0.0160929
Chr14	49779675	49779747	KLHDC2/ENSG00000165516.11/known-exon+anti-near	0	+	10	0.000145503	0.000145503	0.999854	0.18557	-	1	48.0769	211	204	0.332439	-	1	142.923	287	286	reps	0.217842	0.135759	0.322399	0.337308
Chr16	789125	789209	CHTF18/ENSG00000127586.17/known-exon+anti-near	0	+	10	0.000146434	0.000146434	0.999854	0.0790039	-	1	85.8667	1001	908	0.131373	-	1	117.667	778	750	reps	0.0797331	0.0764605	0.116601	0.174977
Chr9	133101762	133101937	AL162417.1/ENSG00000285245.1/clean	0	-	10	0.000149148	0.000149148	0.999851	0.153649	-	1	92.2239	504	504	0.24222	-	1	173.567	537	537	reps	0.201132	0.100841	0.234834	0.253838
Chr8	143992078	143992244	GRINA/ENSG00000178719.17/known-exon+anti-near+anti-over	0	+	10	0.000150185	0.99985	0.000150185	0.128305	-	1	115.25	780	779	0.0767001	-	1	87.6406	1052	1052	reps	0.120072	0.139491	0.114401	0.0533827
Chr19	40577284	40577395	SHKBP1/ENSG00000160410.15/clean	0	+	10	0.00015091	0.999849	0.00015091	0.0645935	-	1	21.6829	314	314	0.0101351	NonUniformIntronCover	1	3	291	291	reps	0.0513252	0.0773297	0.0193548	0
Chr16	70255836	70258032	AARS1/ENSG00000090861.16/clean	0	-	10	0.000151337	0.000151337	0.999849	0.0225622	NonUniformIntronCover	1	38.2717	1658	1632	0.0486536	-	1	46.5902	911	887	reps	0.019359	0.0245371	0.0399552	0.0513121
Chr5	181234995	181235353	TRIM41/ENSG00000146063.20/known-exon+anti-near	0	+	94	0.000151839	0.000151839	0.999848	0.526825	-	1	120.245	101	101	0.787759	-	1	222.698	57	57	reps	0.538612	0.515229	0.821681	0.729197
Chr2	186505597	186505739	ZC3H15/ENSG00000065548.18/clean	0	+	10	0.00015229	0.999848	0.00015229	0.0201998	-	1	16.9259	777	777	0.00294695	-	1	3	1013	1013	reps	0.0182261	0.0212895	0.0034662	0.00226757
Chr5	129105075	129105184	ISOC1/ENSG00000066583.12/clean	0	+	10	0.000154166	0.999846	0.000154166	0.0498996	NonUniformIntronCover	1	7.87805	148	147	0	-	0	0	261	261	reps	0.0136986	0.0813953	0	0
Chr17	7318172	7318268	NEURL4/ENSG00000215041.10/clean	0	-	10	0.000154195	0.000154195	0.999846	0.243819	-	1	67.3889	209	193	0.418714	-	1	115.972	161	150	reps	0.236793	0.257462	0.468527	0.33298
Chr19	49448062	49449474	PIH1D1/ENSG00000104872.11/clean	0	-	145	0.000156622	0.000156622	0.999843	0.12924	-	1	184.191	1214	1197	0.189686	-	1	165.501	682	671	reps	0.134988	0.114954	0.232439	0.146018
Chr12	47965345	47965837	TMEM106C/ENSG00000134291.12/clean	0	+	10	0.000156816	0.000156816	0.999843	0.0281216	-	1	70.5155	2437	2394	0.0482526	-	1	119.041	2348	2306	reps	0.0290598	0.026884	0.0435557	0.0507441
Chr16	1788051	1788137	NUBP2/ENSG00000095906.17/known-exon+anti-near+anti-over	0	+	10	0.000159047	0.999841	0.000159047	0.0595599	-	1	76.125	1202	1184	0.02997	-	1	40.9062	1324	1317	reps	0.0606329	0.0598401	0.0424112	0.0165152
Chr17	81246673	81246884	SLC38A10/ENSG00000157637.13/clean	0	-	10	0.00015962	0.99984	0.00015962	0.68886	NonUniformIntronCover	1	66.4198	30	25	0.338942	-	1	41.5309	81	79	reps	0.743214	0.585375	0.338672	0.336247
Chr10	119576750	119577079	TIAL1/ENSG00000151923.17/clean	0	-	79	0.000159806	0.99984	0.000159806	0.207835	-	1	206.48	787	737	0.14088	-	1	143.32	874	837	reps	0.173417	0.240987	0.108126	0.168818
Chr12	55822187	55822372	AC023055.1/ENSG00000257390.5/anti-near	0	-	10	0.000160401	0.99984	0.000160401	0.075173	-	1	29.831	367	367	0.0258788	NonUniformIntronCover	1	15.4085	580	577	reps	0.0624429	0.087456	0.0225238	0.0328395
Chr17	4894633	4895074	MINK1/ENSG00000141503.17/anti-near	0	+	10	0.000160638	0.999839	0.000160638	0.153035	-	1	67.0347	361	356	0.0699841	-	1	28.7457	382	372	reps	0.108009	0.216941	0.076165	0.063869
Chr8	27544244	27544443	EPHX2/ENSG00000120915.14/clean	0	+	10	0.000160666	0.999839	0.000160666	0.619788	-	1	44.013	27	27	0.224181	NonUniformIntronCover	1	15.026	52	51	reps	0.555669	0.698512	0.226744	0.22246
Chr2	11215645	11216157	ROCK2/ENSG00000134318.14/clean	0	-	10	0.000161976	0.999838	0.000161976	0.0965078	-	1	11.1089	102	102	0	NonUniformIntronCover	0	0	123	123	reps	0.0872771	0.100405	0	0
Chr20	2861899	2862053	VPS16/ENSG00000215305.10/clean	0	+	10	0.00016291	0.999837	0.00016291	0.248179	-	1	29.3793	89	85	0.0819995	NonUniformIntronCover	1	15.8103	176	174	reps	0.197175	0.287031	0.0526316	0.102573
Chr2	233849859	233852564	HJURP/ENSG00000123485.12/clean	0	-	10	0.00016599	0.00016599	0.999834	0.0967665	-	1	35.354	319	319	0.205223	-	1	56.0324	199	199	reps	0.112497	0.0725074	0.207221	0.208671
Chr4	25377344	25377417	ANAPC4/ENSG00000053900.10/known-exon	0	+	10	0.000167433	0.000167433	0.999833	0.0727273	-	1	8	99	99	0.296173	NonUniformIntronCover	1	19.7778	47	47	reps	0.111111	0.0357143	0.27634	0.325
Chr6	31640306	31640384	BAG6/ENSG00000204463.12/anti-near	0	-	10	0.000167751	0.999832	0.000167751	0.0563773	-	1	80.1786	1342	1160	0.0290168	-	1	42.2857	1415	1390	reps	0.0434945	0.0705268	0.0344828	0.0232558
Chr20	37228744	37229972	RPN2/ENSG00000118705.17/clean	0	+	113	0.00016908	0.00016908	0.999831	0.0194699	NonUniformIntronCover	1	47.3378	2384	2376	0.0364734	-	1	90.2819	2379	2378	reps	0.020959	0.0174892	0.0413968	0.0330016
Chr9	128714664	128714797	PKN3/ENSG00000160447.7/clean	0	+	10	0.0001699	0.99983	0.0001699	0.152368	-	1	32.1765	179	177	0.0538675	-	1	17.1373	301	301	reps	0.0797092	0.327869	0.0681538	0.0352296
Chr2	219234288	219234825	ANKZF1/ENSG00000163516.14/anti-near	0	+	10	0.000170725	0.000170725	0.999829	0.263728	-	1	47.6398	133	132	0.50552	-	1	77.6967	76	75	reps	0.270737	0.260075	0.382138	0.70816
Chr18	210031	210385	USP14/ENSG00000101557.15/anti-near	0	+	10	0.000173931	0.999826	0.000173931	0.097317	-	1	67.8116	629	629	0.0502575	NonUniformIntronCover	1	49.8478	942	942	reps	0.10371	0.092011	0.0559409	0.0435986
Chr7	100578258	100578398	LRCH4/ENSG00000077454.16/clean	0	-	10	0.000175393	0.000175393	0.999825	0.124125	-	1	27.6346	188	188	0.292914	-	1	45.1538	100	99	reps	0.110296	0.14433	0.318352	0.249686
Chr9	35076028	35076431	FANCG/ENSG00000221829.10/clean	0	-	10	0.000176085	0.999824	0.000176085	0.442365	MinorIsoform	1	65.8428	51	45	0.21507	-	1	35.3459	129	112	reps	0.385397	0.533583	0.205163	0.226412
Chr11	64258713	64258884	PLCB3/ENSG00000149782.11/clean	0	+	10	0.000177101	0.999823	0.000177101	0.114037	-	1	28.4462	220	220	0.0346079	NonUniformIntronCover	1	11.2923	314	312	reps	0.0919837	0.140636	0.0490771	0.0174419
Chr10	102145090	102146671	PPRC1/ENSG00000148840.11/clean	0	+	10	0.00017735	0.999823	0.00017735	0.137579	-	1	73.7011	426	417	0.0638649	NonUniformIntronCover	1	27.7663	383	377	reps	0.14417	0.133322	0.0648414	0.0581339
Chr20	62307452	62307595	ADRM1/ENSG00000130706.13/anti-near	0	+	10	0.000177849	0.999822	0.000177849	0.0479914	-	1	100.418	1992	1969	0.0254315	NonUniformIntronCover	1	43.1091	1652	1645	reps	0.0441562	0.0546294	0.0225759	0.0285649
Chr1	171587751	171588378	PRRC2C/ENSG00000117523.16/clean	0	+	10	0.000178118	0.999822	0.000178118	0.0280877	-	1	25.5182	853	848	0.00679315	NonUniformIntronCover	1	6.12146	875	875	reps	0.0136106	0.0438269	0.00337466	0.00883605
Chr12	6837849	6837957	P3H3/ENSG00000110811.20/clean	0	+	10	0.000178695	0.999821	0.000178695	0.0650147	NonUniformIntronCover	1	12.725	180	180	0.00711744	-	1	2	278	278	reps	0.0448229	0.105572	0.0136986	0
Chr6	32976169	32976249	BRD2/ENSG00000204256.13/clean	0	+	10	0.000178715	0.000178715	0.999821	0.0658202	-	1	220.321	3127	3116	0.0896952	-	1	320.036	3248	3236	reps	0.0694504	0.0635817	0.0777271	0.102025
Chr12	56421134	56421350	TIMELESS/ENSG00000111602.12/clean	0	-	10	0.000178721	0.000178721	0.999821	0.145789	-	1	148.655	871	862	0.214974	-	1	194.976	712	703	reps	0.134338	0.165527	0.186515	0.252517
Chr2	130182452	130182626	MZT2B/ENSG00000152082.15/known-exon+anti-near+anti-over	0	+	51	0.000181324	0.999819	0.000181324	0.0225341	-	1	99.5686	4319	3999	0.0128656	-	1	63.9412	4828	4726	reps	0.0189637	0.031028	0.013648	0.0128101
Chr9	85958586	85959792	NAA35/ENSG00000135040.16/clean	0	+	10	0.000181863	0.999818	0.000181863	0.0488167	NonUniformIntronCover	1	8.00625	156	148	9.5374e-06	-	0.00250836	0	263	263	reps	0.0593314	0.0304831	0	1.59766e-05
Chr8	38401053	38402524	LETM2/ENSG00000165046.12/anti-over	0	+	144	0.00018221	0.999818	0.00018221	0.630352	NonUniformIntronCover	1	10.2316	6	6	0.0178794	-	0.345893	0.114878	16	16	reps	0.623137	0.623337	0.0647026	0
Chr22	46350463	46352120	TRMU/ENSG00000100416.15/clean	0	+	10	0.000182415	0.000182415	0.999818	0.0416024	-	1	22.9196	528	525	0.10276	-	1	40.7724	356	355	reps	0.0419148	0.0415007	0.0929869	0.114352
Chr6	63703671	63706028	PHF3/ENSG00000118482.12/clean	0	+	10	0.000183257	0.999817	0.000183257	0.062014	-	1	14.6773	222	212	0.00622105	NonUniformIntronCover	0.634001	1.74654	279	276	reps	0.0133512	0.101816	0.00412087	0.00306693
Chr22	50580271	50580357	CHKB/ENSG00000100288.20/clean	0	-	11	0.000183694	0.000183694	0.999816	0.364664	-	1	66.5806	116	116	0.59294	-	1	224.323	154	153	reps	0.348072	0.394967	0.610199	0.577179
Chr17	36514548	36515112	MYO19/ENSG00000278259.4/clean	0	-	10	0.000183891	0.999816	0.000183891	0.189279	MinorIsoform	1	52.2973	224	140	0.080765	-	1	25.5676	291	275	reps	0.151361	0.237381	0.0802428	0.0704153
Chr2	61190414	61190517	USP34/ENSG00000115464.15/known-exon+anti-near+anti-over	0	-	10	0.000184773	0.000184773	0.999815	0.0561531	-	1	18.2051	300	298	0.140059	NonUniformIntronCover	1	49.5128	299	299	reps	0.0609065	0.0499842	0.142361	0.138261
Chr9	33463920	33464036	NOL6/ENSG00000165271.17/clean	0	-	10	0.000185122	0.999815	0.000185122	0.126265	NonUniformIntronCover	1	22.9773	159	153	0.0290249	-	1	6.06818	203	203	reps	0.128288	0.125	0.0266217	0.0368272
Chr16	30965461	30965600	SETD1A/ENSG00000099381.18/clean	0	+	10	0.000192225	0.999808	0.000192225	0.176527	-	1	37.9434	177	177	0.054553	NonUniformIntronCover	1	9.92453	172	172	reps	0.175071	0.162055	0.0759056	0.00782859
Chr12	6967779	6967891	PHB2/ENSG00000215021.9/known-exon+anti-near	0	-	10	0.000193041	0.999807	0.000193041	0.07176	-	1	200.69	2357	2357	0.0503958	-	1	195.405	3522	3522	reps	0.0759257	0.0673454	0.0663505	0.0360192
Chr22	50266611	50266933	MAPK11/ENSG00000185386.15/clean	0	-	10	0.000194065	0.999806	0.000194065	0.491815	-	1	32.9048	34	34	0.152666	-	1	10.2698	56	56	reps	0.475	0.505882	0.212052	0.125
Chr6	43043180	43043447	CUL7/ENSG00000044090.10/known-exon+anti-near+anti-over	0	-	10	0.000201237	0.999799	0.000201237	0.278481	-	1	22	57	54	0.0872227	-	1	15.767	165	160	reps	0.29932	0.254926	0.138371	0.0502704
Chr6	32186901	32187241	PBX2/ENSG00000204304.12/clean	0	-	10	0.000201538	0.999798	0.000201538	0.149916	-	1	55.0227	290	290	0.0722153	-	1	38.2955	488	485	reps	0.107886	0.207987	0.0689405	0.0761875
Chr6	29944616	29945058	HLA-A/ENSG00000206503.13/clean	0	+	28	0.000202028	0.999798	0.000202028	0.0542581	-	1	79.1145	1379	1290	0.0270955	-	1	35.1747	1263	1169	reps	0.0508208	0.0654683	0.0270403	0.0259195
Chr5	43292973	43294055	HMGCS1/ENSG00000112972.15/anti-near	0	-	10	0.000202304	0.999798	0.000202304	0.0443927	-	1	19.0465	410	408	0.0142749	-	1	19.4488	1343	1343	reps	0.0302353	0.0574921	0.0125158	0.0155169
Chr6	30911767	30912013	GTF2H4/ENSG00000213780.11/clean	0	+	10	0.000203554	0.999796	0.000203554	0.272619	-	1	95.5729	243	243	0.148329	-	1	47.1979	266	265	reps	0.236289	0.322338	0.142166	0.141635
Chr6	39878588	39879177	DAAM2/ENSG00000146122.17/anti-near	0	+	10	0.000206329	0.999794	0.000206329	0.370924	-	1	22.9957	39	39	0.0898945	NonUniformIntronCover	1	6.91416	70	70	reps	0.342237	0.432453	0.078699	0.102873
Chr16	87833025	87834413	SLC7A5/ENSG00000103257.9/clean	0	-	10	0.000208972	0.999791	0.000208972	0.0291655	-	1	50.5	1677	1677	0.0101848	-	1	12.5018	1214	1214	reps	0.0218725	0.0371973	0.0123174	0.00549882
Chr12	6869183	6869257	TPI1/ENSG00000111669.15/anti-near	0	+	10	0.000210036	0.000210036	0.99979	0.00732387	-	1	90.6154	12241	12241	0.0122191	-	1	104.269	8411	8411	reps	0.00889161	0.00556257	0.0126427	0.0113707
Chr16	30054927	30055171	AC093512.2/ENSG00000285043.1/clean	0	+	10	0.000212629	0.000212629	0.999787	0.0416667	-	1	2	46	38	0.416408	NonUniformIntronCover	1	9.98936	14	12	reps	0.0714286	0.01078	0.147838	0.884945
Chr11	10803294	10803479	EIF4G2/ENSG00000110321.18/anti-near	0	-	10	0.000214668	0.999785	0.000214668	0.0122908	-	1	66.7606	5342	5342	0.00563409	NonUniformIntronCover	1	26.7606	4718	4718	reps	0.00825944	0.0144268	0.00516398	0.00593911
Chr10	93692093	93692645	FRA10AC1/ENSG00000148690.12/clean	0	-	10	0.000215652	0.999784	0.000215652	0.0949699	-	1	54.1468	516	468	0.0398651	-	1	21.7982	516	516	reps	0.0697634	0.137288	0.0202724	0.067962
Chr11	57741954	57742116	SELENOH/ENSG00000211450.10/anti-near	0	+	10	0.000216156	0.999784	0.000216156	0.0136101	-	1	36.4677	2630	2626	0.00537644	NonUniformIntronCover	1	23.9194	4425	4411	reps	0.0126384	0.0162434	0.00801705	0.00246171
Chr4	145143445	145143945	OTUD4/ENSG00000164164.17/clean	0	-	10	0.000220603	0.999779	0.000220603	0.0627035	NonUniformIntronCover	1	7.7602	116	116	0	-	0	0	192	192	reps	0.041721	0.0744879	0	0
Chr11	65630604	65634125	PCNX3/ENSG00000197136.4/clean	0	+	57	0.000220929	0.999779	0.000220929	0.151775	NonUniformIntronCover	0.995092	34.7128	194	166	0.0595073	-	0.989607	20.3737	322	305	reps	0.135259	0.165556	0.0704412	0.0446013
Chr22	41356476	41356644	ZC3H7B/ENSG00000100403.12/clean	0	+	10	0.000221102	0.999779	0.000221102	0.0447761	-	1	11.5781	245	245	0.00578035	-	1	2.75	473	473	reps	0.048271	0.0420584	0	0.0120219
Chr5	180621007	180621105	FLT4/ENSG00000037280.16/known-exon	0	-	10	0.000223545	0.000223545	0.999776	0.0263345	NonUniformIntronCover	1	1.02778	38	38	0.448698	-	1	8.13889	10	10	reps	0	0.0342276	0.593679	0.0677966
Chr16	2453537	2455394	CCNF/ENSG00000162063.13/anti-near	0	+	10	0.000223674	0.000223674	0.999776	0.0122633	NonUniformIntronCover	0.965891	4.18403	337	335	0.060583	-	1	22.636	351	351	reps	0.0134579	0.00709797	0.0641536	0.0517952
Chr17	75619476	75619680	MYO15B/ENSG00000266714.9/clean	0	+	10	0.000225188	0.999775	0.000225188	1	LowCover	1	7.4359	0	0	0.0109804	-	0.14433	0	13	13	reps	1	1	0.020202	0
Chr3	186790255	186790325	RFC4/ENSG00000163918.10/anti-near	0	-	10	0.000227694	0.000227694	0.999772	0.149511	-	1	123.583	695	691	0.234186	-	1	121.708	398	391	reps	0.150197	0.147583	0.235088	0.23445
Chr11	63999763	64000226	MACROD1/ENSG00000133315.11/anti-over	0	-	10	0.000229414	0.999771	0.000229414	0.0658729	NonUniformIntronCover	1	51.1257	725	717	0.0291582	-	1	27.7814	925	921	reps	0.0633669	0.0668246	0.0368801	0.0205352
Chr15	89305698	89306006	FANCI/ENSG00000140525.18/anti-over	0	+	10	0.000229647	0.99977	0.000229647	0.0411801	NonUniformIntronCover	1	24.0083	559	488	0.00903558	-	1	5.61667	616	586	reps	0.0356729	0.0517931	0.0105723	0.00809005
Chr9	136404194	136404630	ENTR1/ENSG00000165689.17/clean	0	-	10	0.000229772	0.99977	0.000229772	0.0404616	NonUniformIntronCover	1	33.186	783	782	0.0152251	-	1	20.7326	1341	1341	reps	0.0312658	0.0526116	0.0182079	0.0115038
Chr16	1500699	1501419	TELO2/ENSG00000100726.15/clean	0	+	10	0.000230479	0.99977	0.000230479	0.0946729	-	1	59.7113	571	493	0.0472584	-	1	42.7077	861	771	reps	0.0896383	0.105119	0.0507524	0.0400403
Chr11	85662457	85663523	CREBZF/ENSG00000137504.13/known-exon	0	-	10	0.000230562	0.999769	0.000230562	0.422693	MinorIsoform	1	235.762	322	225	0.30937	-	1	269.219	601	539	reps	0.379898	0.442744	0.284518	0.322353
Chr18	36138426	36138794	ELP2/ENSG00000134759.14/clean	0	+	10	0.000231757	0.999768	0.000231757	0.151533	MinorIsoform	1	6.96528	39	17	0.0153958	-	0.97486	2.36111	151	145	reps	0.170825	0.149128	0	0.0267212
Chr19	46722950	46723113	STRN4/ENSG00000090372.15/clean	0	-	10	0.000233772	0.999766	0.000233772	0.0548565	-	1	30.5873	522	522	0.0191265	NonUniformIntronCover	1	15.619	800	798	reps	0.0446454	0.0701944	0.0254383	0.0101168
Chr1	64804838	64804990	RAVER2/ENSG00000162437.14/clean	0	+	10	0.000234064	0.999766	0.000234064	0.176243	-	1	18.8276	88	86	0.0529883	-	1	14.8276	265	265	reps	0.195807	0.158382	0.0354443	0.0630596
Chr2	85542373	85542564	MAT2A/ENSG00000168906.13/anti-near	0	+	10	0.000234465	0.999766	0.000234465	0.173673	-	1	275.329	1310	1308	0.125934	-	1	211.507	1467	1467	reps	0.173107	0.173733	0.131511	0.121194
Chr9	128422978	128423145	CERCAM/ENSG00000167123.19/clean	0	+	10	0.000236609	0.000236609	0.999763	0.0409166	-	1	12.1587	284	281	0.11758	NonUniformIntronCover	1	44.2381	327	320	reps	0.0557989	0.0113339	0.12093	0.112434
Chr12	123605981	123606072	DDX55/ENSG00000111364.16/clean	0	+	10	0.00023878	0.00023878	0.999761	0.0684895	-	1	23.4545	319	299	0.159667	-	1	47.1212	248	238	reps	0.0721972	0.0656447	0.172842	0.149089
Chr17	7223237	7223643	ACADVL/ENSG00000072778.20/anti-near	0	+	103	0.000240069	0.99976	0.000240069	0.138306	-	1	126.959	791	735	0.0777792	-	1	48.748	578	576	reps	0.122635	0.155912	0.084265	0.0699615
Chr10	73798070	73798229	ZSWIM8/ENSG00000214655.10/anti-over	0	+	28	0.000240149	0.000240149	0.99976	0.0670341	-	1	28.4528	396	395	0.160243	-	1	35.3019	185	185	reps	0.0741157	0.0591716	0.183107	0.136642
Chr1	26879749	26884159	GPN2/ENSG00000142751.15/anti-near	0	-	10	0.000242947	0.999757	0.000242947	0.274981	-	1	48.5472	126	126	0.135815	-	1	49.5051	315	315	reps	0.326318	0.21248	0.176226	0.0949357
Chr4	67634518	67635452	UBA6/ENSG00000033178.13/clean	0	-	10	0.000243848	0.999756	0.000243848	0.100459	-	1	11.8378	100	98	0.00902074	-	0.638528	1.31081	144	144	reps	0.0895534	0.0997867	0.00809517	0.00437498
Chr1	45617591	45618060	NASP/ENSG00000132780.17/anti-near	0	+	10	0.000244688	0.999755	0.000244688	0.0299402	-	1	67.3459	1947	1940	0.0138211	NonUniformIntronCover	1	26.2216	1833	1824	reps	0.0216467	0.0418945	0.0129203	0.0146453
Chr20	58713543	58713916	NPEPL1/ENSG00000215440.12/clean	0	+	47	0.000245821	0.000245821	0.999754	0.139221	NonUniformIntronCover	1	16.6591	103	100	0.357026	-	1	54.4167	98	95	reps	0.165942	0.0954479	0.332296	0.416555
Chr2	131492024	131492206	MZT2A/ENSG00000173272.16/anti-near	0	-	21	0.000247996	0.999752	0.000247996	0.0971638	-	1	138.615	1252	1207	0.0646956	-	1	150.308	2173	2117	reps	0.077985	0.13592	0.071811	0.0544555
Chr19	55241391	55241476	PPP6R1/ENSG00000105063.19/clean	0	-	10	0.000249337	0.999751	0.000249337	0.193021	-	1	89.9355	366	364	0.115394	-	1	92.2258	686	682	reps	0.224505	0.155825	0.149181	0.0870178
Chr22	20709379	20709907	PI4KA/ENSG00000241973.11/anti-near	0	-	122	0.000251899	0.999748	0.000251899	0.0622708	-	1	26.0976	393	343	0.0150424	NonUniformIntronCover	0.987685	6.59756	432	410	reps	0.0581036	0.0633655	0.0114775	0.0181784
Chr11	10855086	10856143	ZBED5/ENSG00000236287.8/clean	0	-	278	0.000252967	0.000252967	0.999747	0.156354	MinorIsoform	1	42.9968	162	162	0.288599	-	1	105.07	207	207	reps	0.17741	0.145331	0.276495	0.308447
Chr17	40027034	40027382	MED24/ENSG00000008838.20/clean	0	-	10	0.000253358	0.000253358	0.999747	0.0540979	-	1	60.0515	1041	1041	0.0980627	-	1	75.8897	698	694	reps	0.0587933	0.0469294	0.10444	0.09289
Chr17	82056550	82056628	GPS1/ENSG00000169727.12/anti-near	0	+	10	0.00025376	0.999746	0.00025376	0.0354021	-	1	51.7857	1365	1365	0.0150546	-	1	21.8571	1430	1425	reps	0.0285714	0.0465102	0.0214421	0.00939746
Chr16	789360	789546	CHTF18/ENSG00000127586.17/anti-near	0	+	12	0.000254001	0.999746	0.000254001	0.0221475	-	1	15.2429	623	617	0.00157978	-	0.885057	1	630	626	reps	0.010101	0.0516731	0.00240964	0
Chr6	30489595	30489725	HLA-E/ENSG00000204592.9/clean	0	+	10	0.000254534	0.999745	0.000254534	0.106211	-	1	57.3958	483	483	0.0465086	NonUniformIntronCover	1	22.4375	460	460	reps	0.0972008	0.116015	0.0565266	0.0275138
Chr17	63820438	63820838	FTSJ3/ENSG00000108592.17/anti-near	0	-	10	0.000254782	0.999745	0.000254782	0.0613792	-	1	20.141	308	308	0.0177253	NonUniformIntronCover	1	12	665	665	reps	0.0568769	0.0637119	0.0247488	0.0057593
Chr3	142499718	142503361	ATR/ENSG00000175054.16/clean	0	-	10	0.000255975	0.999744	0.000255975	0.0890987	-	1	11.3464	116	115	0.00323792	-	0.409304	0.27354	126	123	reps	0.0421674	0.120907	0.00346938	0.0039374
Chr2	241668221	241668539	ATG4B/ENSG00000168397.17/clean	0	+	10	0.000258094	0.999742	0.000258094	0.067228	-	1	44.6855	602	602	0.0240133	NonUniformIntronCover	1	13.5323	530	530	reps	0.0594091	0.0824768	0.0247726	0.0217201
Chr1	155904502	155904730	RIT1/ENSG00000143622.11/clean	0	-	28	0.000259195	0.999741	0.000259195	0.0481444	-	1	7.6375	151	124	0	NonUniformIntronCover	0	0	238	237	reps	0.0480032	0.0484809	0	0
Chr14	20455394	20455577	APEX1/ENSG00000100823.12/known-exon+anti-near	0	+	44	0.000260521	0.999739	0.000260521	0.132035	NonUniformIntronCover	1	157.14	825	809	0.083846	-	1	92.5263	863	855	reps	0.13654	0.12584	0.0923677	0.0536073
Chr7	66086821	66087333	ASL/ENSG00000126522.17/clean	0	+	10	0.000261304	0.999739	0.000261304	0.375973	-	1	16.2673	21	21	0.0980024	MinorIsoform	1	10.3218	69	68	reps	0.431479	0.308895	0.122148	0.0630352
Chr19	35744145	35744322	U2AF1L4/ENSG00000161265.15/clean	0	-	10	0.000261571	0.000261571	0.999738	0.172284	-	1	19.1493	88	88	0.471306	-	1	29.4179	33	33	reps	0.139865	0.221706	0.416238	0.576437
Chr19	10557682	10557768	KRI1/ENSG00000129347.21/anti-near	0	-	10	0.000261665	0.000261665	0.999738	0.151589	-	1	70.2188	393	392	0.254594	-	1	116.469	341	341	reps	0.149671	0.153833	0.239932	0.273415
Chr2	112520425	112528680	TTL/ENSG00000114999.8/clean	0	+	2017	0.000262664	0.000262664	0.999737	0.00758562	MinorIsoform	0.813722	1.94912	192	189	0.0596617	-	1	22.8409	325	299	reps	0.00305382	0.0116455	0.0511033	0.0642702
Chr11	70407591	70409830	CTTN/ENSG00000085733.16/clean	0	+	10	0.000263492	0.000263492	0.999737	0.0166247	NonUniformIntronCover	1	24.2766	1435	1432	0.0402722	-	1	34.6607	826	813	reps	0.0167029	0.0150902	0.0327989	0.0532653
Chr12	56599848	56599963	BAZ2A/ENSG00000076108.11/anti-near	0	-	10	0.000264913	0.000264913	0.999735	0.0227015	NonUniformIntronCover	1	20	852	852	0.0573548	-	1	40.2791	660	660	reps	0.0225235	0.0213142	0.060715	0.0556776
Chr2	218688876	218689858	STK36/ENSG00000163482.12/clean	0	+	10	0.000265406	0.999735	0.000265406	0.121019	MinorIsoform	1	9.5	69	51	0.00884249	-	0.70679	1.07949	121	118	reps	0.11791	0.127139	0.0119634	0.00468954
Chr5	1576309	1579276	SDHAP3/ENSG00000185986.12/clean	0	-	468	0.000266447	0.000266447	0.999734	0.105358	-	1	17.0759	131	125	0.252878	-	1	68.7093	169	158	reps	0.101103	0.116755	0.175822	0.342764
Chr1	40766703	40769355	NFYC/ENSG00000066136.20/clean	0	+	77	0.000268187	0.000268187	0.999732	0.0135547	-	1	8.97284	648	606	0.0512623	NonUniformIntronCover	1	21.3967	387	369	reps	0.0171182	0.0102828	0.0430159	0.0582533
Chr4	103145681	103145828	CENPE/ENSG00000138778.13/clean	0	-	10	0.000268649	0.999731	0.000268649	0.105179	-	1	16.6909	140	140	0.0179435	NonUniformIntronCover	1	3.70909	203	203	reps	0.0867633	0.121485	0.0355781	0.00740741
Chr13	113636128	113636533	TFDP1/ENSG00000198176.13/clean	0	+	10	0.000269926	0.000269926	0.99973	0.00674153	-	1	9.25786	1364	1358	0.022771	-	1	28.195	1210	1208	reps	0.00936744	0.00458716	0.0162845	0.0296597
Chr17	41821817	41822222	FKBP10/ENSG00000141756.19/anti-near	0	+	10	0.000271738	0.999728	0.000271738	0.174455	-	1	221.887	1050	1030	0.120976	-	1	144.094	1047	1032	reps	0.167733	0.184794	0.148152	0.0975192
Chr14	21391063	21391462	CHD8/ENSG00000100888.14/clean	0	-	10	0.000273744	0.000273744	0.999726	0.00790618	NonUniformIntronCover	1	5.14013	645	612	0.0378442	-	1	16.8344	428	396	reps	0.00900451	0.00710653	0.0105756	0.069566
Chr19	10395343	10395434	CDC37/ENSG00000105401.9/known-exon	0	-	10	0.000276392	0.000276392	0.999724	0.102822	-	1	324.909	2832	2832	0.134576	-	1	341.485	2195	2195	reps	0.108978	0.0954469	0.142788	0.12316
Chr1	44214898	44218310	DMAP1/ENSG00000178028.14/known-exon+anti-near	0	+	572	0.000276483	0.000276483	0.999724	0.14711	-	1	59.6796	346	319	0.25817	NonUniformIntronCover	1	96.7491	278	244	reps	0.160384	0.137216	0.221544	0.291628
Chr20	58995759	58996638	CTSZ/ENSG00000101160.14/anti-near	0	-	10	0.000280346	0.99972	0.000280346	0.0616052	-	1	34.2034	514	512	0.025514	-	1	27.9885	1061	1059	reps	0.0567638	0.0782629	0.0243323	0.0275654
Chr11	64797380	64797500	MAP4K2/ENSG00000168067.12/clean	0	-	10	0.000281982	0.999718	0.000281982	0.416018	-	1	61.9773	87	86	0.201994	-	1	33.1591	131	130	reps	0.439426	0.370022	0.258074	0.150215
Chr17	2376261	2376732	SGSM2/ENSG00000141258.13/anti-over	0	+	130	0.000282639	0.999717	0.000282639	0.138088	-	1	15.7007	98	97	0.0240427	NonUniformIntronCover	1	3.35036	136	136	reps	0.13728	0.14375	0.0363423	0.0142155
Chr6	43203204	43203416	CUL9/ENSG00000112659.14/clean	0	+	10	0.000282905	0.999717	0.000282905	0.214922	-	1	7.93902	29	26	0.012987	-	0.861386	1	76	70	reps	0.150259	0.389362	0	0.025641
Chr17	75516616	75516745	TSEN54/ENSG00000182173.13/clean	0	+	10	0.000287335	0.999713	0.000287335	0.294317	-	1	62.1429	149	136	0.14209	-	1	32.9592	199	186	reps	0.25575	0.372344	0.190572	0.0458622
Chr12	30630957	30631894	IPO8/ENSG00000133704.10/clean	0	-	279	0.000287738	0.999712	0.000287738	0.31092	NonUniformIntronCover	1	64.072	142	138	0.157363	-	1	40.1515	215	214	reps	0.327181	0.29105	0.137731	0.202142
Chr12	6977525	6977597	LPCAT3/ENSG00000111684.11/known-exon+anti-near+anti-over	0	-	10	0.000290676	0.999709	0.000290676	0.233892	-	1	68.6923	225	210	0.122828	-	1	46.7692	334	331	reps	0.176781	0.315789	0.118256	0.124415
Chr17	50482706	50483339	RSAD1/ENSG00000136444.10/clean	0	+	10	0.000292732	0.999707	0.000292732	0.35372	-	1	42.1434	77	65	0.159856	-	1	34.6295	175	174	reps	0.318947	0.383797	0.156783	0.168756
Chr3	58433684	58433767	PDHB/ENSG00000168291.13/clean	0	-	10	0.000293859	0.999706	0.000293859	0.13311	-	1	38.3871	234	234	0.0564427	-	1	27.9355	452	452	reps	0.1131	0.173752	0.0449512	0.0717965
Chr11	126267712	126268002	SRPRA/ENSG00000182934.12/anti-near	0	-	10	0.000295469	0.999705	0.000295469	0.069796	-	1	28.4375	379	332	0.022712	-	1	12.9911	559	547	reps	0.0581153	0.0814892	0.0145455	0.029778
Chr17	40032090	40032648	MED24/ENSG00000008838.20/clean	0	-	10	0.000298248	0.999702	0.000298248	0.0365709	-	1	30.0636	792	792	0.009071	NonUniformIntronCover	1	5.93182	648	647	reps	0.0349383	0.0384089	0.0143561	0.00358153
Chr20	35472831	35473373	CEP250/ENSG00000126001.16/anti-near	0	+	10	0.000298349	0.999702	0.000298349	0.108412	NonUniformIntronCover	1	5.71495	47	47	0	-	0	0	116	116	reps	0.119342	0.0901361	0	0
Chr8	144516764	144517049	RECQL4/ENSG00000160957.14/anti-near	0	-	10	0.000299124	0.999701	0.000299124	0.405405	MinorIsoform	1	137.045	110	110	0.246677	-	1	70.7297	189	189	reps	0.364989	0.466684	0.248052	0.24204
Chr16	2464229	2464521	TEDC2/ENSG00000162062.15/known-exon	0	+	10	0.000302024	0.999698	0.000302024	0.569811	-	1	210.605	156	156	0.39794	-	1	158.632	235	235	reps	0.59105	0.527815	0.443389	0.327135
Chr9	136380850	136381321	SNAPC4/ENSG00000165684.4/clean	0	-	10	0.000302853	0.999697	0.000302853	0.0805441	-	1	35.3027	403	385	0.026705	NonUniformIntronCover	1	11.1946	408	405	reps	0.0570804	0.108664	0.0349149	0.0145928
Chr5	139314736	139315696	MATR3/ENSG00000015479.19/clean	0	+	10	0.000303031	0.999697	0.000303031	0.0359238	MinorIsoform	1	49.2237	1321	915	0.0161357	-	1	27.9789	1706	1671	reps	0.0325832	0.0377838	0.0160751	0.016557
Chr4	112647127	112647198	LARP7/ENSG00000174720.16/anti-over	0	+	10	0.000304957	0.999695	0.000304957	0.141996	-	1	21.68	131	124	0.0503104	-	1	21.72	410	397	reps	0.155746	0.123288	0.055794	0.0425317
Chr12	6748547	6748769	MLF2/ENSG00000089693.10/clean	0	-	13	0.000305205	0.000305205	0.999695	0.0216115	-	1	53.0353	2398	2398	0.0387381	-	1	89.9882	2231	2231	reps	0.0191867	0.0244893	0.0346065	0.0458496
Chr11	64265227	64265309	PLCB3/ENSG00000149782.11/anti-near	0	+	10	0.000308315	0.999692	0.000308315	0.190591	-	1	36.7333	156	156	0.0782736	-	1	21.4	252	252	reps	0.169994	0.220951	0.12108	0.0307452
Chr6	33684168	33684356	ITPR3/ENSG00000096433.11/clean	0	+	10	0.000308787	0.999691	0.000308787	0.129362	-	1	22.1389	146	146	0.0281285	NonUniformIntronCover	1	4.48611	155	155	reps	0.0843672	0.178194	0.0536692	0.00819012
Chr4	3130047	3130304	HTT/ENSG00000197386.12/clean	0	+	10	0.000311624	0.999688	0.000311624	0.110153	-	1	12.1313	90	90	0.015544	NonUniformIntronCover	0.88664	3	175	175	reps	0.06639	0.150367	0.00362541	0.0263158
Chr17	7313469	7313567	GPS2/ENSG00000132522.16/anti-near	0	-	10	0.000312389	0.999688	0.000312389	0.0919566	-	1	56.3056	556	550	0.0395064	NonUniformIntronCover	1	20.2778	488	488	reps	0.0899272	0.0984523	0.0158165	0.066294
Chr16	375256	375344	PGAP6/ENSG00000129925.11/clean	0	-	10	0.000312975	0.000312975	0.999687	0.023329	NonUniformIntronCover	1	16.2188	673	673	0.0633681	-	1	33.2188	481	481	reps	0.0326943	0.00993377	0.0767173	0.0409134
Chr1	153939045	153939588	DENND4B/ENSG00000198837.10/anti-near	0	-	10	0.000314851	0.999685	0.000314851	0.124432	-	1	24.586	173	141	0.0363783	NonUniformIntronCover	1	8.4186	223	217	reps	0.0989633	0.162153	0.058621	0.0182275
Chr1	51790649	51790899	NRDC/ENSG00000078618.21/anti-over	0	-	10	0.000315333	0.999685	0.000315333	0.0371681	-	1	40.0312	1035	1035	0.0127816	NonUniformIntronCover	1	11.8854	916	916	reps	0.0322724	0.041659	0.0107066	0.0146533
ChrX	154012678	154013042	IRAK1/ENSG00000184216.14/clean	0	-	10	0.000316017	0.999684	0.000316017	0.0256234	-	1	39.9718	1520	1491	0.00979298	NonUniformIntronCover	1	16.8028	1690	1668	reps	0.0243431	0.0264114	0.00749791	0.012003
Chr3	52706703	52706792	SPCS1/ENSG00000114902.14/anti-near	0	+	10	0.000317828	0.000317828	0.999682	0.00153728	NonUniformIntronCover	1	2	1299	1227	0.0123088	-	1	15.7273	1262	1216	reps	0.00142653	0.00166667	0.0119225	0.012736
Chr7	5222672	5225822	WIPI2/ENSG00000157954.15/clean	0	+	70	0.000317879	0.000317879	0.999682	0.0137483	NonUniformIntronCover	1	13.2151	946	946	0.040469	-	1	27.836	659	659	reps	0.0096834	0.0180068	0.0326588	0.0462689
Chr1	145994437	145994543	TXNIP/ENSG00000265972.6/clean	0	-	10	0.000320366	0.000320366	0.99968	0.0202952	-	1	11	531	531	0.0683366	-	1	23.325	318	318	reps	0.0269839	0.0169492	0.0361446	0.0792146
ChrX	49173483	49174334	PLP2/ENSG00000102007.11/anti-near	0	+	210	0.000321274	0.000321274	0.999679	0.0082083	NonUniformIntronCover	1	16.6187	1996	1996	0.0245143	-	1	25.4319	1000	1000	reps	0.0100967	0.00715993	0.0222292	0.0261502
Chr10	73770471	73770708	SEC24C/ENSG00000176986.16/known-exon	0	+	10	0.000322177	0.000322177	0.999678	0.0639658	-	1	55.6264	813	813	0.114981	-	1	84.967	646	646	reps	0.0740448	0.0522143	0.151052	0.0858717
Chr11	66693446	66693771	SPTBN2/ENSG00000173898.13/clean	0	-	10	0.00032251	0.999677	0.00032251	0.0931472	-	1	13.7638	134	134	0.0127645	NonUniformIntronCover	0.996825	2.27559	176	173	reps	0.0500727	0.13558	0.0185185	0.00487409
Chr15	23006172	23006267	TUBGCP5/ENSG00000275835.5/clean	0	-	10	0.000323864	0.999676	0.000323864	0.207317	-	1	10.2	39	39	0.0217391	-	1	2	90	89	reps	0.115385	0.310345	0.0285714	0.0172414
Chr20	20032653	20033101	NAA20/ENSG00000173418.12/anti-near	0	+	10	0.000325426	0.999675	0.000325426	0.0478165	-	1	16.7727	309	308	0.0119865	NonUniformIntronCover	1	8.61364	693	693	reps	0.0350999	0.0583829	0.00602144	0.0193368
Chr1	26945686	26946129	NUDC/ENSG00000090273.14/anti-near	0	+	10	0.000325541	0.999674	0.000325541	0.0175865	-	1	37.36	2084	2081	0.00652435	-	1	15.9714	2431	2431	reps	0.0132205	0.0224457	0.00619756	0.00572375
Chr17	41811034	41811131	P3H4/ENSG00000141696.13/clean	0	-	10	0.000327912	0.999672	0.000327912	0.224422	MinorIsoform	1	40.8	98	98	0.106669	-	1	41.3143	330	330	reps	0.201141	0.275196	0.153465	0.0560949
Chr22	38867201	38871479	CBX6/ENSG00000183741.12/clean	0	-	10	0.000328982	0.000328982	0.999671	0.015745	-	1	18.3964	1046	1041	0.0411772	NonUniformIntronCover	1	32.1663	664	663	reps	0.0130118	0.0172284	0.0339732	0.0472401
Chr13	25257321	25257735	MTMR6/ENSG00000139505.11/clean	0	-	10	0.000328983	0.999671	0.000328983	0.132487	NonUniformIntronCover	1	4.12346	27	27	0.00753239	-	0.759901	1.38889	183	183	reps	0.260274	0.113832	0.0106819	0.00469076
Chr10	102147392	102148371	PPRC1/ENSG00000148840.11/clean	0	+	10	0.000329155	0.999671	0.000329155	0.141242	-	1	80.7558	416	416	0.0720094	-	1	34.7635	440	438	reps	0.11457	0.167444	0.0782744	0.0692646
ChrX	134425330	134425660	PHF6/ENSG00000156531.17/known-exon	0	+	10	0.000335027	0.999665	0.000335027	0.420793	-	1	88.6328	122	119	0.262485	-	1	130.617	367	366	reps	0.435377	0.400429	0.230138	0.280697
Chr20	2862130	2862578	VPS16/ENSG00000215305.10/clean	0	+	10	0.000336128	0.999664	0.000336128	0.293908	NonUniformIntronCover	1	33.7159	81	76	0.125221	-	1	27.3409	191	173	reps	0.148835	0.442597	0.135271	0.115853
Chr17	67738355	67738931	NOL11/ENSG00000130935.10/clean	0	+	10	0.00033696	0.00033696	0.999663	0.0391287	-	1	27.0395	664	654	0.0840512	-	1	56.6184	617	612	reps	0.0485749	0.0315944	0.0811098	0.0876541
Chr5	65577069	65579423	PPWD1/ENSG00000113593.12/clean	0	+	10	0.000343912	0.999656	0.000343912	0.291705	-	1	37.4776	91	84	0.120652	NonUniformIntronCover	1	25.5203	184	181	reps	0.298478	0.27669	0.0948887	0.147363
Chr8	144316709	144316852	DGAT1/ENSG00000185000.12/anti-near	0	-	10	0.000345859	0.000345859	0.999654	0.00804829	NonUniformIntronCover	1	4	492	490	0.0469408	-	1	14.3818	290	290	reps	0.00364964	0.0133929	0.0763668	0.0250457
Chr5	71635246	71641002	MCCC2/ENSG00000131844.16/clean	0	+	1475	0.000346514	0.999653	0.000346514	0.0447977	-	0.994627	15.4297	329	278	0.00666142	NonUniformIntronCover	0.951413	2.95738	441	433	reps	0.0283984	0.0590559	0.00645792	0.00619316
Chr16	657221	657761	WDR90/ENSG00000161996.19/clean	0	+	10	0.000348851	0.999651	0.000348851	0.293618	-	1	48.217	116	103	0.139959	-	1	36.1274	222	221	reps	0.267641	0.340289	0.216044	0.0480968
Chr17	41755432	41755729	JUP/ENSG00000173801.17/known-exon	0	-	10	0.000349274	0.000349274	0.999651	0.313693	-	1	280.643	614	614	0.424244	-	1	232.843	316	316	reps	0.335041	0.288319	0.487751	0.360243
Chr1	1637513	1637761	CDK11B/ENSG00000248333.8/anti-near	0	-	10	0.000349482	0.999651	0.000349482	0.0969568	-	1	34.25	318	318	0.0356809	NonUniformIntronCover	1	16.6875	451	449	reps	0.0864257	0.102489	0.0199899	0.0559188
Chr11	62677634	62677780	UBXN1/ENSG00000162191.13/anti-near	0	-	10	0.000350316	0.000350316	0.99965	0.0539838	-	1	147.911	2591	2568	0.0808733	-	1	139.375	1584	1563	reps	0.063323	0.0427911	0.0774785	0.0905071
Chr16	724205	724321	CCDC78/ENSG00000162004.17/anti-near	0	-	10	0.000354756	0.999645	0.000354756	0.918063	LowSplicing	1	11.2045	0	0	0.196458	-	1	8.06818	31	31	reps	0.8	1	0.363855	0.15625
Chr9	130614345	130616354	FUBP3/ENSG00000107164.16/clean	0	+	10	0.000355759	0.999644	0.000355759	0.036094	-	1	24.4145	652	615	0.0110108	NonUniformIntronCover	1	11.7903	1059	1054	reps	0.0158803	0.0553648	0.0081125	0.0124001
Chr17	29572697	29572811	TP53I13/ENSG00000167543.16/anti-near	0	+	10	0.000355776	0.999644	0.000355776	0.319048	-	1	93.2381	199	193	0.170639	-	1	40.7381	198	198	reps	0.298938	0.364211	0.181312	0.156485
Chr1	6467572	6467824	PLEKHG5/ENSG00000171680.22/clean	0	-	10	0.000363178	0.999637	0.000363178	0.371257	-	1	17.7143	30	30	0.0857143	NonUniformIntronCover	1	6	64	64	reps	0.276404	0.536173	0.1262	0.0480573
Chr11	68446533	68448808	LRP5/ENSG00000162337.12/clean	0	+	197	0.00036379	0.00036379	0.999636	0.0447544	-	0.988932	21.2704	454	415	0.103402	NonUniformIntronCover	1	52.4736	455	394	reps	0.044081	0.0392894	0.115507	0.0947952
Chr6	29944397	29944499	HLA-A/ENSG00000206503.13/clean	0	+	10	0.000365443	0.999635	0.000365443	0.0282906	-	1	46.8158	1537	1502	0.0106127	-	1	13.8158	1228	1204	reps	0.0239685	0.0324018	0.0157322	0.00337134
Chr12	110382960	110386326	ANAPC7/ENSG00000196510.12/clean	0	-	60	0.000365471	0.999635	0.000365471	0.0306217	-	1	11.6563	369	367	0.00517539	NonUniformIntronCover	0.966727	3.38671	651	650	reps	0.0202205	0.0377791	0.00443143	0.00416784
Chr9	128713642	128714045	PKN3/ENSG00000160447.7/clean	0	+	10	0.000366134	0.999634	0.000366134	0.0970983	-	1	19.5723	182	175	0.0290807	NonUniformIntronCover	1	10.3333	336	334	reps	0.0870501	0.110312	0.0457429	0.00653595
Chr10	103097374	103098930	NT5C2/ENSG00000076685.18/clean	0	-	137	0.000367443	0.999633	0.000367443	0.157032	NonUniformIntronCover	1	48.993	263	249	0.0677091	-	1	21.9332	300	295	reps	0.115918	0.200546	0.0454663	0.0755925
Chr17	2692482	2692570	CLUH/ENSG00000132361.17/anti-near	0	-	10	0.000371399	0.999629	0.000371399	0.087688	-	1	36.8125	380	380	0.0323182	-	1	14.0938	419	419	reps	0.0690909	0.119373	0.048851	0.0165597
Chr6	42964471	42964789	PEX6/ENSG00000124587.14/anti-near	0	-	10	0.000378607	0.999621	0.000378607	0.276079	-	1	28.9839	67	67	0.0658911	NonUniformIntronCover	1	5.57258	79	79	reps	0.269729	0.27603	0.0266474	0.103351
Chr6	43200156	43200435	CUL9/ENSG00000112659.14/clean	0	+	10	0.000383884	0.999616	0.000383884	0.206933	NonUniformIntronCover	1	8.87156	34	34	0.021978	-	0.988848	2	89	88	reps	0.192593	0.26698	0.0222222	0.0217391
Chr2	86130737	86131077	PTCD3/ENSG00000132300.19/clean	0	+	10	0.000385115	0.999615	0.000385115	0.101393	-	1	54.2727	479	479	0.0458113	-	1	23.4773	482	482	reps	0.0817316	0.112616	0.0273684	0.0525636
Chr17	8268856	8268953	PFAS/ENSG00000178921.14/known-exon+anti-near	0	+	10	0.000386877	0.999613	0.000386877	0.0569215	-	1	14.4857	240	233	0.00718735	NonUniformIntronCover	1	2.14286	296	295	reps	0.0426165	0.076326	0.0112003	0.000994575
Chr17	82012283	82016475	ASPSCR1/ENSG00000169696.16/anti-near	0	+	606	0.000388904	0.999611	0.000388904	0.223007	-	1	51.6623	180	168	0.102518	-	1	25.3586	222	219	reps	0.234366	0.20559	0.0848513	0.120424
Chr2	74475115	74475224	CCDC142/ENSG00000135637.14/anti-near	0	-	10	0.0003924	0.999608	0.0003924	0.416815	-	1	40.0244	55	55	0.192118	-	1	34.2439	144	143	reps	0.360284	0.471116	0.231315	0.153533
Chr11	62676639	62676812	UBXN1/ENSG00000162191.13/known-exon+anti-near	0	-	10	0.000392718	0.999607	0.000392718	0.0479496	-	1	54.7463	1087	928	0.0188608	NonUniformIntronCover	1	13.4179	698	683	reps	0.049521	0.0465809	0.0245232	0.0139382
Chr17	80112100	80112577	GAA/ENSG00000171298.13/clean	0	+	10	0.000392964	0.000392964	0.999607	0.105353	NonUniformIntronCover	1	11.1872	95	77	0.287991	-	1	54.6043	135	129	reps	0.098466	0.106884	0.297858	0.279196
Chr8	144395551	144396347	CPSF1/ENSG00000071894.17/anti-near	0	-	10	0.000395367	0.999605	0.000395367	0.285387	-	1	139.775	349	349	0.187293	-	1	111.31	483	482	reps	0.229501	0.360069	0.187876	0.196495
Chr6	32186690	32186812	PBX2/ENSG00000204304.12/clean	0	-	10	0.000395419	0.999605	0.000395419	0.189805	-	1	59.7391	255	234	0.0969949	-	1	40.0652	373	366	reps	0.177494	0.209881	0.0766727	0.125672
Chr7	6824548	6824639	CCZ1B/ENSG00000146574.15/clean	0	-	27	0.000398584	0.999601	0.000398584	0.561446	-	1	8.96154	7	7	0.012987	-	0.25	0	19	19	reps	0.545455	0.596899	0	0.04
Chr5	179798434	179798512	MGAT4B/ENSG00000161013.17/anti-near	0	-	19	0.000399635	0.9996	0.000399635	0.0676151	-	1	49.24	673	673	0.0293535	-	1	21.32	701	701	reps	0.0602421	0.0779074	0.039732	0.0144199
Chr12	47794933	47795183	HDAC7/ENSG00000061273.18/clean	0	-	10	0.000401403	0.999599	0.000401403	0.0745408	NonUniformIntronCover	1	10.2292	127	125	0.00505051	-	0.825	1	197	196	reps	0.0750703	0.0720562	0.00579065	0.00271696
Chr10	103387698	103388005	TAF5/ENSG00000148835.11/anti-near	0	+	10	0.000404514	0.999595	0.000404514	0.101496	-	1	11.7479	103	103	0.0134276	-	0.814815	2.21849	162	162	reps	0.113563	0.0855808	0.00954145	0.0136624
Chr6	31637136	31637233	PRRC2A/ENSG00000204469.13/anti-near	0	+	10	0.000406338	0.000406338	0.999594	0.0284389	-	1	86.0286	2939	2917	0.0455749	-	1	113.6	2379	2365	reps	0.0235277	0.0351993	0.0424086	0.04922
Chr14	58365300	58365517	ARID4A/ENSG00000032219.19/anti-near	0	+	10	0.000412511	0.000412511	0.999587	0.000859001	NonUniformIntronCover	0.101449	0	118	118	0.0855932	-	1	8.51807	91	91	reps	0.000675871	0.00148968	0.107022	0.0707647
Chr22	50246092	50246297	HDAC10/ENSG00000100429.18/clean	0	-	10	0.000413617	0.000413617	0.999586	0.0959374	-	1	25.4684	240	234	0.206627	-	1	53.9114	207	198	reps	0.0701999	0.150416	0.179931	0.232784
Chr3	196937648	196939250	NCBP2/ENSG00000114503.11/anti-near	0	-	52	0.000416195	0.999584	0.000416195	0.120833	-	1	40.6823	289	289	0.0589562	-	1	45.0452	715	715	reps	0.100451	0.143741	0.0573726	0.0588028
Chr3	50290294	50290387	IFRD2/ENSG00000214706.10/anti-near	0	-	10	0.000418579	0.999581	0.000418579	0.124965	-	1	90.4	633	496	0.0672147	-	1	42.5143	590	565	reps	0.11255	0.131362	0.0618861	0.0755556
Chr5	181053316	181053468	BTNL9/ENSG00000165810.17/clean	0	+	10	0.000421364	0.000421364	0.999579	0.11536	-	1	9.25862	71	65	0.449	NonUniformIntronCover	1	15.4828	19	18	reps	0.0802239	0.152783	0.368707	0.485069
Chr14	102048669	102049439	DYNC1H1/ENSG00000197102.12/anti-over	0	+	10	0.000421724	0.999578	0.000421724	0.0379053	-	1	34.5526	877	870	0.0118465	NonUniformIntronCover	1	8.83553	737	735	reps	0.0190595	0.063797	0.00782645	0.016941
Chr8	143925884	143926783	PLEC/ENSG00000178209.15/clean	0	-	10	0.000422471	0.999578	0.000422471	0.215805	MinorIsoform	1	71	121	120	0.0917226	-	1	17.5714	165	165	reps	0.253403	0.186395	0.121839	0.0443079
Chr16	15600553	15600640	MARF1/ENSG00000166783.22/anti-over	0	-	10	0.00042808	0.999572	0.00042808	0.26436	MinorIsoform	1	38.4516	107	56	0.107721	-	1	20.1613	167	157	reps	0.1692	0.382162	0.113381	0.102972
Chr10	75234992	75235059	COMTD1/ENSG00000165644.11/known-exon+anti-near	0	-	10	0.000428716	0.999571	0.000428716	0.468586	-	1	229.261	260	213	0.34264	-	1	225.174	432	402	reps	0.423492	0.539581	0.372449	0.296266
Chr3	69056063	69056182	UBA3/ENSG00000144744.17/known-exon+anti-near+anti-over	0	-	10	0.000430151	0.99957	0.000430151	0.0825651	NonUniformIntronCover	1	45.1778	502	498	0.0319936	-	1	14.3111	433	433	reps	0.060205	0.103601	0.0319394	0.0324775
Chr19	804208	804291	PTBP1/ENSG00000011304.20/clean	0	+	10	0.000430608	0.999569	0.000430608	0.0288961	-	1	60.6129	2037	2031	0.0153822	NonUniformIntronCover	1	47.2581	3025	3022	reps	0.0215745	0.0358107	0.0190247	0.0120964
Chr17	36585965	36586049	GGNBP2/ENSG00000278311.5/clean	0	+	10	0.000430774	0.999569	0.000430774	0.0341763	-	1	16.6667	457	457	0.00458957	NonUniformIntronCover	1	2.03333	440	440	reps	0.0265608	0.0391459	0.00930233	0.00136135
Chr16	57754997	57755118	KATNB1/ENSG00000140854.13/anti-near	0	+	10	0.000431111	0.999569	0.000431111	0.0517594	-	1	11.2444	206	205	0.00647459	-	1	2.22222	341	341	reps	0.0183697	0.104172	0.00639163	0.00657895
Chr9	137615000	137615073	ARRDC1/ENSG00000197070.14/known-exon+anti-near	0	+	10	0.000434524	0.999565	0.000434524	0.443254	-	1	205.407	258	252	0.297977	-	1	101.444	239	237	reps	0.461557	0.410396	0.297628	0.300025
Chr12	6970280	6970416	PHB2/ENSG00000215021.9/anti-near	0	-	10	0.000437077	0.999563	0.000437077	0.0336562	-	1	91.8077	2636	2635	0.0198211	-	1	64.3462	3181	3180	reps	0.0292187	0.0384292	0.0199406	0.0197974
Chr15	44564698	44565853	SPG11/ENSG00000104133.15/anti-near	0	-	10	0.000437872	0.999562	0.000437872	0.578765	-	1	31.6013	23	23	0.21366	NonUniformIntronCover	1	14.4009	53	53	reps	0.387292	0.735065	0.263081	0.157698
Chr17	81194127	81194869	CEP131/ENSG00000141577.14/clean	0	-	10	0.000438955	0.999561	0.000438955	0.0877039	-	1	24.4184	248	248	0.0229097	NonUniformIntronCover	1	6.37755	272	272	reps	0.0970444	0.0718525	0.0228171	0.0242492
Chr22	37616997	37618447	GGA1/ENSG00000100083.19/clean	0	+	61	0.000439969	0.000439969	0.99956	0.110726	-	1	36.2334	283	281	0.209656	-	1	82.7648	310	309	reps	0.114946	0.108934	0.23836	0.177945
Chr2	169557297	169560386	FASTKD1/ENSG00000138399.18/clean	0	-	10	0.000444494	0.999556	0.000444494	0.265822	-	1	28.6034	79	69	0.0995564	NonUniformIntronCover	1	17.6902	160	150	reps	0.231297	0.298778	0.0680663	0.118434
Chr21	44326060	44326158	PFKL/ENSG00000141959.17/anti-near	0	+	10	0.000445049	0.000445049	0.999555	0.00289296	NonUniformIntronCover	1	3	1034	1034	0.0182873	-	1	12.6111	677	677	reps	0.002849	0.00298507	0.0150578	0.0226244
Chr1	46192958	46193173	POMGNT1/ENSG00000085998.14/clean	0	-	10	0.000445555	0.999554	0.000445555	0.110946	-	1	17.0964	137	137	0.0287793	NonUniformIntronCover	1	8.77108	296	296	reps	0.0588162	0.202756	0.0328947	0.0261438
Chr1	23793039	23793150	LYPLA2/ENSG00000011009.11/anti-near	0	+	10	0.00044622	0.999554	0.00044622	0.0689803	-	1	35.3415	448	448	0.0229093	-	1	11.5122	475	475	reps	0.0519615	0.089467	0.0269687	0.0202821
Chr2	27382228	27382475	PPM1G/ENSG00000115241.11/anti-near	0	-	10	0.000448908	0.999551	0.000448908	0.0399492	-	1	44.3579	1066	1037	0.0184017	NonUniformIntronCover	1	31.0632	1657	1643	reps	0.0428036	0.0373254	0.0193287	0.0179966
Chr17	28716994	28717212	RAB34/ENSG00000109113.20/clean	0	-	10	0.000451379	0.999549	0.000451379	0.0863611	MinorIsoform	1	39.4167	289	278	0.0356295	-	1	22.5	551	550	reps	0.060952	0.136015	0.032204	0.0399539
Chr3	133618433	133620154	TOPBP1/ENSG00000163781.14/clean	0	-	10	0.000453038	0.999547	0.000453038	0.0920526	-	1	44.7109	410	410	0.0350578	NonUniformIntronCover	1	13.1883	360	360	reps	0.0901513	0.0984663	0.0233881	0.0414798
Chr7	1437980	1438096	MICALL2/ENSG00000164877.19/clean	0	-	10	0.000461041	0.999539	0.000461041	0.408712	MinorIsoform	1	20.0455	16	16	0.0825688	-	1	4.5	47	47	reps	0.399317	0.427746	0.0909091	0.0697674
Chr17	4731574	4731775	MED11/ENSG00000161920.11/anti-over	0	+	30	0.000467185	0.999533	0.000467185	0.179998	-	1	28.5362	130	122	0.0681894	-	1	17.7826	242	242	reps	0.166043	0.199697	0.0598758	0.0780793
Chr16	722789	722921	CCDC78/ENSG00000162004.17/anti-near	0	-	10	0.000469734	0.99953	0.000469734	1	LowSplicing	1	12.08	0	0	0.210859	-	1	6.68	25	25	reps	1	1	0.468892	0.0226969
Chr2	101021746	101022280	TBC1D8/ENSG00000204634.12/anti-over	0	-	10	0.000472586	0.999527	0.000472586	0.247087	-	1	31.5048	96	96	0.0744368	NonUniformIntronCover	1	7.9619	99	99	reps	0.235004	0.263209	0.0668849	0.0765571
Chr19	19132754	19133129	TMEM161A/ENSG00000064545.15/clean	0	-	10	0.000472796	0.999527	0.000472796	0.0683534	-	1	18.7823	256	230	0.0175246	NonUniformIntronCover	1	7.59864	426	420	reps	0.0428519	0.0949205	0.0212199	0.0175606
Chr20	41363054	41363637	EMILIN3/ENSG00000183798.5/anti-near	0	-	10	0.000473048	0.999527	0.000473048	0.12461	-	1	4.83983	34	34	0.00956687	NonUniformIntronCover	0.904014	1.41991	147	147	reps	0.16	0.0324717	0.00357322	0.0174168
Chr16	89860795	89863475	SPIRE2/ENSG00000204991.11/clean	0	+	100	0.000474703	0.000474703	0.999525	0.100029	-	1	27.3421	246	240	0.241829	-	1	28.0688	87	78	reps	0.102453	0.0911673	0.217621	0.264354
Chr15	75339878	75339964	COMMD4/ENSG00000140365.16/clean	0	+	10	0.000475046	0.999525	0.000475046	0.0886786	-	1	63.25	573	573	0.0476857	-	1	51.125	847	847	reps	0.0752822	0.122765	0.0445251	0.0533393
Chr2	152575244	152578887	FMNL2/ENSG00000157827.20/clean	0	+	10	0.00047539	0.999525	0.00047539	0.131842	NonUniformIntronCover	1	7.89691	52	48	0.00443788	-	0.503716	0.558763	112	108	reps	0.114538	0.122483	0.00735445	0.0038983
Chr20	44625684	44626455	ADA/ENSG00000196839.13/anti-near	0	-	10	0.000476887	0.999523	0.000476887	0.169172	NonUniformIntronCover	1	11.8098	55	54	0.0335154	-	1	5.65246	145	145	reps	0.159104	0.168404	0.00621782	0.0566232
Chr11	6609156	6609298	ILK/ENSG00000166333.14/known-exon+anti-near+anti-over	0	+	10	0.000480916	0.999519	0.000480916	0.0949086	-	1	66.7963	609	609	0.0481519	-	1	33.9444	657	657	reps	0.0694135	0.132888	0.0271835	0.0666598
Chr1	23978273	23978652	SRSF10/ENSG00000188529.15/clean	0	-	10	0.000481043	0.000481043	0.999519	0.0338817	-	1	14.6242	398	398	0.0892243	-	1	43.0067	439	434	reps	0.0172591	0.0446268	0.0491485	0.120119
Chr11	248855	248931	PSMD13/ENSG00000185627.18/clean	0	+	10	0.000482616	0.999517	0.000482616	0.060628	-	1	86.6786	1327	1324	0.0342634	-	1	48.4643	1366	1364	reps	0.0672273	0.0529121	0.0295704	0.0413382
Chr9	128721502	128721650	ZDHHC12/ENSG00000160446.19/anti-near	0	-	38	0.000485456	0.000485456	0.999515	0.0172423	NonUniformIntronCover	1	14.7727	778	778	0.0530918	-	1	21.25	359	359	reps	0.0136725	0.0259595	0.0475648	0.0615819
Chr16	72107548	72107644	DHX38/ENSG00000140829.12/anti-near	0	+	10	0.000485489	0.000485489	0.999515	0	-	0	0	367	367	0.029679	-	1	8.16667	267	267	reps	0	0	0.0134436	0.0526316
Chr12	6846367	6846724	CDCA3/ENSG00000111665.11/known-exon+anti-near+anti-over	0	-	10	0.000486186	0.999514	0.000486186	0.400532	-	1	31.4029	47	44	0.161547	NonUniformIntronCover	1	22.9281	119	119	reps	0.397867	0.40743	0.148597	0.176668
Chr11	65581373	65581538	EHBP1L1/ENSG00000173442.13/clean	0	+	10	0.000486949	0.999513	0.000486949	0.10219	MinorIsoform	1	4.66667	41	28	0.000710266	-	0.083871	0	118	116	reps	0.0111059	0.246154	0.00178131	0
Chr6	43513200	43513358	YIPF3/ENSG00000137207.12/known-exon+anti-near+anti-over	0	-	10	0.000490985	0.000490985	0.999509	0.0373453	-	1	47.7167	1090	1085	0.0721168	NonUniformIntronCover	1	54.0167	645	640	reps	0.0257402	0.0510196	0.0614716	0.0859502
Chr1	1754698	1755373	NADK/ENSG00000008130.15/clean	0	-	10	0.000493686	0.999506	0.000493686	0.143691	-	1	95.6479	570	551	0.086697	NonUniformIntronCover	1	75.5618	796	768	reps	0.121635	0.175	0.0902585	0.082892
Chr1	166850423	166852584	POGK/ENSG00000143157.11/known-exon+anti-near	0	+	10	0.000497258	0.999503	0.000497258	0.389468	-	1	101.429	159	154	0.241426	-	1	90.0685	279	272	reps	0.350231	0.429535	0.193246	0.295912
Chr4	88046870	88051990	PKD2/ENSG00000118762.8/clean	0	+	10	0.000498139	0.999502	0.000498139	0.261384	-	1	18.7559	49	49	0.073796	NonUniformIntronCover	1	8.36595	101	100	reps	0.280683	0.251622	0.0563015	0.0814576
Chr7	143264676	143264991	GSTK1/ENSG00000197448.14/anti-over	0	+	16	0.000498299	0.999502	0.000498299	0.153712	-	1	63.9339	344	344	0.0859426	-	1	64.876	690	686	reps	0.129443	0.189291	0.122316	0.0540751
Chr20	2836314	2838231	PCED1A/ENSG00000132635.17/clean	0	-	10	0.000498984	0.999501	0.000498984	0.358829	MinorIsoform	1	54.8453	55	54	0.207583	-	1	119.717	404	404	reps	0.350622	0.370689	0.197395	0.223086
Chr16	31110761	31111090	BCKDK/ENSG00000103507.14/clean	0	+	10	0.000499011	0.999501	0.000499011	0.0506874	NonUniformIntronCover	1	21.8915	385	383	0.0156491	-	1	11.5736	710	710	reps	0.0220058	0.0960012	0.0134609	0.0167453
Chr3	141916020	141921976	ATP1B3/ENSG00000069849.11/anti-over	0	+	636	0.000506177	0.999494	0.000506177	0.0230164	NonUniformIntronCover	0.990977	23.2289	967	956	0.00693537	-	0.946805	9.98684	1427	1421	reps	0.0144076	0.0297253	0.00417133	0.00842664
Chr2	108782401	108782527	RANBP2/ENSG00000153201.16/clean	0	+	10	0.00050621	0.999494	0.00050621	0.0882797	-	1	68.1667	704	700	0.0430596	NonUniformIntronCover	1	26.4583	587	587	reps	0.105574	0.0715667	0.0179856	0.0637191
Chr9	35385813	35386164	UNC13B/ENSG00000198722.14/clean	0	+	10	0.000507804	0.999492	0.000507804	0.28755	-	1	34.3066	85	85	0.0918381	-	1	9.70803	96	96	reps	0.187994	0.38246	0.0862315	0.1
Chr2	27441180	27441266	NRBP1/ENSG00000115216.14/anti-near	0	+	10	0.000508651	0.000508651	0.999491	0.00582212	-	1	10.875	1857	1856	0.0215211	-	1	13.8125	628	628	reps	0.002997	0.00922722	0.0191781	0.0220713
Chr5	34922588	34922694	BRIX1/ENSG00000113460.13/clean	0	+	10	0.000509791	0.000509791	0.99949	0.00396862	-	1	5.375	1343	1343	0.0168086	-	1	19.25	1125	1125	reps	0.00292735	0.00489964	0.018427	0.0143179
Chr12	32708224	32710928	DNM1L/ENSG00000087470.18/clean	0	+	84	0.000511497	0.999489	0.000511497	0.0815006	-	1	31.5	355	332	0.0296318	-	1	12.3979	405	403	reps	0.0572211	0.100534	0.0130519	0.043783
Chr13	37008177	37008728	EXOSC8/ENSG00000120699.13/anti-near	0	+	10	0.000511621	0.999488	0.000511621	0.0276646	-	1	12.9171	454	445	0.00407251	NonUniformIntronCover	1	2.35945	577	575	reps	0.0187467	0.0391247	0.00263255	0.0058309
Chr9	128720283	128720393	PKN3/ENSG00000160447.7/anti-near	0	+	10	0.000513916	0.999486	0.000513916	0.117695	-	1	35.75	263	258	0.0495759	NonUniformIntronCover	1	23.525	451	437	reps	0.121835	0.107505	0.0582696	0.0407566
Chr16	88732732	88733277	PIEZO1/ENSG00000103335.22/anti-over	0	-	10	0.000514785	0.999485	0.000514785	0.283269	-	1	147.814	374	371	0.18079	-	1	80.7721	360	360	reps	0.252749	0.327983	0.232504	0.133368
Chr16	1762731	1762835	MAPK8IP3/ENSG00000138834.13/clean	0	+	10	0.000518042	0.000518042	0.999482	0.00647249	NonUniformIntronCover	1	4	614	612	0.0334917	-	1	14.6579	422	420	reps	0.00789474	0.00420168	0.0481443	0.0190797
Chr6	42966657	42966781	PEX6/ENSG00000124587.14/anti-near	0	-	10	0.00051907	0.999481	0.00051907	0.505261	-	1	46.9783	45	45	0.179818	-	1	10.3043	47	47	reps	0.478888	0.538075	0.192982	0.166792
Chr2	241462612	241463334	FARP2/ENSG00000006607.14/clean	0	+	10	0.000519107	0.999481	0.000519107	0.396879	LowCover	0.98736	3.29021	5	4	0	-	0	0	43	43	reps	0.163337	0.489893	0	0
Chr16	28981615	28981900	SPNS1/ENSG00000169682.18/clean	0	+	10	0.000522501	0.999477	0.000522501	0.0655314	MinorIsoform	1	24.6847	352	249	0.0228995	-	1	13.2883	567	431	reps	0.0483772	0.0962074	0.0226346	0.0232183
Chr14	74891167	74892833	DLST/ENSG00000119689.15/clean	0	+	36	0.000522748	0.000522748	0.999477	0.0700357	NonUniformIntronCover	1	62.658	773	773	0.12355	-	1	71.8926	495	492	reps	0.0624743	0.0756801	0.104605	0.138046
Chr6	30606243	30606467	PPP1R10/ENSG00000204569.10/clean	0	-	10	0.000523744	0.999476	0.000523744	0.0726789	-	1	24.1395	308	308	0.0204693	NonUniformIntronCover	1	7.31395	350	350	reps	0.0322623	0.118719	0.0314654	0.0106952
Chr1	1353629	1353847	MXRA8/ENSG00000162576.16/clean	0	-	10	0.000526833	0.000526833	0.999473	0.27897	-	1	12.381	28	28	0.71138	-	1	61.619	24	24	reps	0.352601	0.230769	0.728155	0.706088
Chr3	123956427	123956739	CCDC14/ENSG00000175455.15/known-exon	0	-	10	0.000527343	0.000527343	0.999473	0.354657	-	1	58.8033	104	98	0.583715	-	1	143.025	93	88	reps	0.383838	0.322827	0.520718	0.620749
Chr2	169946392	169947541	UBR3/ENSG00000144357.17/clean	0	+	10	0.000528537	0.999471	0.000528537	0.137093	-	1	12.8687	75	75	0.0197746	NonUniformIntronCover	0.796313	2.29978	113	113	reps	0.141991	0.123864	0.0088949	0.00603278
Chr3	127677563	127677675	ABTB1/ENSG00000114626.18/clean	0	+	10	0.0005341	0.0005341	0.999466	0.097737	-	1	14.1905	131	128	0.278606	-	1	26.2619	68	68	reps	0.0810291	0.133574	0.259135	0.313208
Chr9	81584305	81584447	TLE1/ENSG00000196781.16/clean	0	-	10	0.000534839	0.000534839	0.999465	0.00559604	-	0.848485	1.59259	283	281	0.0533289	NonUniformIntronCover	1	14.7593	262	262	reps	0	0.0126806	0.0985111	0.0194805
Chr12	108537595	108538064	SART3/ENSG00000075856.12/known-exon+anti-near+anti-over	0	-	10	0.000540054	0.99946	0.000540054	0.1281	-	1	35.8486	240	238	0.052888	-	1	20.773	364	362	reps	0.0975965	0.161202	0.0488975	0.0496067
Chr7	128400891	128401014	IMPDH1/ENSG00000106348.18/clean	0	-	10	0.000540075	0.000540075	0.99946	0.0122405	-	1	10.2979	798	798	0.0380265	-	1	22.5319	513	513	reps	0.0110199	0.0139484	0.0324445	0.0460251
Chr8	38267960	38268370	PLPP5/ENSG00000147535.17/anti-over	0	-	10	0.000540691	0.000540691	0.999459	0.226232	-	1	53.2125	181	181	0.401637	NonUniformIntronCover	1	74.5062	104	104	reps	0.156709	0.314197	0.333109	0.469948
Chr17	63824929	63825047	FTSJ3/ENSG00000108592.17/clean	0	-	10	0.000540702	0.999459	0.000540702	0.0669392	-	1	11.9091	166	166	0.0161828	-	1	8.93182	543	541	reps	0.0786517	0.0547315	0.0108749	0.0220588
Chr10	68341309	68341584	HNRNPH3/ENSG00000096746.17/known-exon+anti-near+anti-over	0	+	10	0.000545507	0.999454	0.000545507	0.037404	-	1	95.8224	2465	2464	0.0230605	-	1	86.7477	3675	3674	reps	0.0384572	0.0347306	0.0178245	0.0283566
Chr18	57602486	57602811	NARS1/ENSG00000134440.12/clean	0	-	10	0.000546265	0.999454	0.000546265	0.0928621	-	1	132.669	1296	1296	0.0608965	-	1	108.551	1674	1674	reps	0.102615	0.081808	0.0619107	0.0603583
Chr3	49684656	49684737	MST1/ENSG00000173531.15/anti-near	0	-	10	0.000556198	0.999444	0.000556198	0.569573	NonUniformIntronCover	1	10.5862	8	8	0.0434783	-	1	1	22	22	reps	0.27044	1	0.2	0.00853375
Chr10	102400491	102400654	NFKB2/ENSG00000077150.20/anti-near	0	+	10	0.000558041	0.999442	0.000558041	0.138171	-	1	44.7302	268	268	0.0421967	NonUniformIntronCover	1	6.47619	145	145	reps	0.126315	0.148866	0.0528829	0.0232558
Chr8	144424819	144424945	VPS28/ENSG00000160948.14/clean	0	-	10	0.000569748	0.99943	0.000569748	0.127428	-	1	89.375	611	610	0.0749489	-	1	64.9792	802	802	reps	0.1336	0.115752	0.0947927	0.05608
Chr5	10260911	10261559	CCT5/ENSG00000150753.12/clean	0	+	10	0.000573813	0.999426	0.000573813	0.0173108	-	1	103.492	5875	5755	0.010237	NonUniformIntronCover	1	57.4648	5551	5549	reps	0.013624	0.0207345	0.0119322	0.00832414
Chr11	6608967	6609070	ILK/ENSG00000166333.14/known-exon+anti-near+anti-over	0	+	21	0.00057779	0.999422	0.00057779	0.100987	-	1	66.5	592	561	0.0493509	-	1	27.6176	532	517	reps	0.0769005	0.139142	0.0417995	0.0615322
Chr5	80474830	80477218	ZFYVE16/ENSG00000039319.17/anti-over	0	+	10	0.000578514	0.999421	0.000578514	0.172339	-	1	45.3929	218	212	0.0710804	NonUniformIntronCover	1	16.4517	215	215	reps	0.14824	0.191938	0.0667291	0.0731419
ChrX	154463690	154463950	PLXNA3/ENSG00000130827.6/clean	0	+	10	0.000578515	0.000578515	0.999421	0.187362	-	1	24.67	107	99	0.438349	MinorIsoform	1	33.56	43	21	reps	0.203431	0.158485	0.499129	0.345121
Chr16	28844551	28844697	TUFM/ENSG00000178952.11/clean	0	-	10	0.000579463	0.999421	0.000579463	0.0558288	-	1	87.5714	1479	1479	0.0340771	NonUniformIntronCover	1	81.1071	2296	2295	reps	0.0552414	0.0602504	0.0456454	0.0196752
Chr19	7911159	7911249	MAP2K7/ENSG00000076984.17/anti-near	0	+	10	0.000579498	0.000579498	0.999421	0.00507614	NonUniformIntronCover	1	2	385	385	0.0424281	-	1	12.4062	277	277	reps	0.00518135	0.00497512	0.0374282	0.0467813
Chr14	20994901	20995164	METTL17/ENSG00000165792.17/known-exon+anti-near	0	+	10	0.000582275	0.999418	0.000582275	0.457165	-	1	399.194	474	474	0.348406	-	1	217.087	406	406	reps	0.466189	0.440654	0.333548	0.363009
Chr5	177302496	177302576	RAB24/ENSG00000169228.14/anti-near	0	-	10	0.00058256	0.999417	0.00058256	0.0471956	-	1	19.7143	398	390	0.0109409	NonUniformIntronCover	1	5	452	443	reps	0.0248963	0.079096	0.0153846	0.00507614
Chr16	89898649	89898766	TCF25/ENSG00000141002.20/clean	0	+	10	0.000583331	0.999417	0.000583331	0.0276619	-	1	17.5814	618	606	0.00751618	NonUniformIntronCover	1	8.53488	1127	1126	reps	0.02156	0.0380404	0.0115163	0.00487805
Chr17	7944248	7944475	CNTROB/ENSG00000170037.14/clean	0	+	10	0.000588509	0.000588509	0.999411	0.157933	-	1	34.8851	179	176	0.307795	-	1	63.5862	137	137	reps	0.144194	0.188361	0.346511	0.26753
Chr19	45146480	45146570	PPP1R37/ENSG00000104866.11/anti-near	0	+	10	0.000590464	0.99941	0.000590464	0.229747	-	1	39.9688	134	134	0.0839161	-	1	12	130	130	reps	0.170029	0.302632	0.0965493	0.0681421
Chr15	41521880	41522097	RPAP1/ENSG00000103932.12/clean	0	-	10	0.000592189	0.000592189	0.999408	0.0150316	NonUniformIntronCover	0.879227	1.14458	69	69	0.151913	-	1	17.5542	91	89	reps	0.0263158	0.00894545	0.141847	0.157256
Chr16	89739289	89739477	FANCA/ENSG00000187741.15/known-exon+anti-near+anti-over	0	-	10	0.00059309	0.00059309	0.999407	0.154332	-	1	86.1389	472	439	0.239673	-	1	135.861	431	410	reps	0.152685	0.156514	0.272199	0.211179
Chr11	69643246	69643831	CCND1/ENSG00000110092.4/clean	0	+	10	0.000593331	0.999407	0.000593331	0.113785	-	1	22.9827	179	175	0.0454356	-	1	29.7489	625	619	reps	0.0885654	0.146483	0.0577334	0.036603
Chr12	53503808	53504396	TARBP2/ENSG00000139546.11/anti-near	0	+	10	0.000595281	0.000595281	0.999405	0.0295967	NonUniformIntronCover	1	15.2802	501	494	0.0754112	-	1	34.6638	425	422	reps	0.026393	0.0319889	0.0564922	0.0957143
Chr9	137614214	137614298	ARRDC1/ENSG00000197070.14/anti-near	0	+	10	0.000598037	0.999402	0.000598037	0.11163	-	1	62.2	486	484	0.0542411	-	1	28.7333	494	494	reps	0.0672016	0.196661	0.0646492	0.0409046
Chr17	44668233	44669382	MEIOC/ENSG00000180336.18/anti-near	0	+	10	0.000598871	0.999401	0.000598871	0.587251	-	1	27.0328	19	17	0.148183	NonUniformIntronCover	1	5.21882	30	28	reps	0.61459	0.580209	0.0655352	0.238206
Chr9	129005221	129005302	NUP188/ENSG00000095319.14/anti-near	0	+	10	0.000600229	0.000600229	0.9994	0.00885891	-	1	6.06897	679	675	0.036752	-	1	18.2759	479	479	reps	0.0108792	0.00600601	0.045082	0.028727
Chr5	141629306	141629683	HDAC3/ENSG00000171720.10/anti-near	0	-	10	0.000609971	0.99939	0.000609971	0.0619679	-	1	29.2653	443	434	0.0244388	NonUniformIntronCover	1	21.619	863	857	reps	0.0439911	0.0873974	0.034006	0.0181298
Chr2	9919111	9919597	TAF1B/ENSG00000115750.17/clean	0	+	10	0.000613342	0.999387	0.000613342	0.0639466	NonUniformIntronCover	1	14.0729	206	199	0.00975631	-	1	2.36458	240	240	reps	0.0162338	0.0953962	0.0132796	0.00528793
Chr6	83194652	83195594	RWDD2A/ENSG00000013392.8/anti-near	0	+	10	0.000614455	0.000614455	0.999386	0.0290165	-	0.85515	2.03209	65	65	0.20219	NonUniformIntronCover	1	21.0348	67	64	reps	0.0104691	0.0467938	0.119127	0.254221
Chr4	119460242	119460730	AC093752.1/ENSG00000245958.6/clean	0	+	63	0.000616868	0.999383	0.000616868	0.0895511	-	1	7.08187	70	69	0.00336121	NonUniformIntronCover	0.404706	0.263158	120	120	reps	0.0691643	0.0968728	0.00630845	0.0010174
Chr12	53039343	53039629	EIF4B/ENSG00000063046.17/known-exon+anti-near+anti-over	0	+	10	0.000620337	0.000620337	0.99938	0.0124725	NonUniformIntronCover	1	24.9821	1974	1972	0.0274103	-	1	46.1071	1633	1632	reps	0.00769107	0.0173076	0.0258122	0.0302351
Chr16	67944931	67945086	SLC12A4/ENSG00000124067.17/known-exon	0	-	10	0.000621705	0.999378	0.000621705	0.164583	-	1	15.1695	77	76	0.0439479	-	1	9.10169	198	198	reps	0.169014	0.164306	0.0203128	0.0683178
Chr16	670557	670674	RHOT2/ENSG00000140983.14/clean	0	+	10	0.000623059	0.999377	0.000623059	0.0723149	MinorIsoform	1	68.4419	878	415	0.0396189	-	1	48.3488	1172	960	reps	0.0586056	0.0937776	0.052531	0.0278233
Chr11	65635803	65636173	PCNX3/ENSG00000197136.4/clean	0	+	10	0.00062398	0.999376	0.00062398	0.193198	-	1	61.0625	255	225	0.101663	NonUniformIntronCover	1	43.5694	385	346	reps	0.172469	0.234237	0.108275	0.0920318
Chr11	62602889	62603148	EML3/ENSG00000149499.11/clean	0	-	10	0.000623994	0.999376	0.000623994	0.387337	NonUniformIntronCover	1	60.6931	79	79	0.222993	-	1	81.505	252	252	reps	0.401396	0.35729	0.30974	0.153113
Chr1	3635294	3635943	WRAP73/ENSG00000116213.16/clean	0	-	10	0.000625898	0.999374	0.000625898	0.247819	-	1	117.949	338	332	0.151149	-	1	61.4319	282	281	reps	0.222798	0.274282	0.124148	0.183146
Chr7	55978265	55978349	NIPSNAP2/ENSG00000146729.10/clean	0	+	10	0.000630495	0.99937	0.000630495	0.0102906	-	1	4.53333	436	411	0.000164926	-	0.175676	0	1065	1048	reps	0.00760456	0.0142696	0	0.000280553
Chr15	74897219	74897511	MPI/ENSG00000178802.18/anti-near	0	+	10	0.000630506	0.000630506	0.999369	0.034332	MinorIsoform	1	15.4298	216	214	0.0819278	-	1	52.0263	454	454	reps	0.0179023	0.0487509	0.0779824	0.0842989
Chr1	32194160	32194901	TXLNA/ENSG00000084652.16/anti-near	0	+	10	0.000634122	0.999366	0.000634122	0.0642781	-	1	23.2184	334	331	0.0208027	-	1	10.4949	491	491	reps	0.0470026	0.0799769	0.0301418	0.0106262
Chr11	65659797	65660123	RELA/ENSG00000173039.19/clean	0	-	10	0.000636526	0.999363	0.000636526	0.0438923	-	1	35.5781	775	705	0.0166486	-	1	13.1719	778	770	reps	0.0321513	0.0528856	0.0244327	0.0103867
Chr2	172080206	172080327	METAP1D/ENSG00000172878.14/known-exon	0	+	10	0.000643629	0.999356	0.000643629	0.176471	-	1	12	55	55	0.0138889	-	0.90991	1	70	70	reps	0.114071	0.24254	0.030303	0
Chr11	126268086	126268687	SRPRA/ENSG00000182934.12/anti-near	0	-	10	0.00064792	0.999352	0.00064792	0.0888469	-	1	28.3755	243	243	0.0312896	NonUniformIntronCover	1	13.1139	394	394	reps	0.0793448	0.0870301	0.0465659	0.0180513
Chr12	57516337	57516434	MARS1/ENSG00000166986.15/known-exon+anti-near	0	+	10	0.000647968	0.000647968	0.999352	0.060963	NonUniformIntronCover	1	118.286	1821	1821	0.092492	-	1	119.143	1168	1168	reps	0.0621686	0.0600686	0.100785	0.0836411
Chr11	63996941	63997049	OTUB1/ENSG00000167770.11/anti-near	0	+	10	0.000648051	0.999352	0.000648051	0.0155477	-	1	33.15	2090	2084	0.00528614	-	1	11.5	2163	2161	reps	0.0116794	0.0207574	0.0065464	0.00431887
Chr16	1362320	1362451	GNPTG/ENSG00000090581.10/anti-near	0	+	10	0.000650054	0.99935	0.000650054	0.336761	-	1	118.306	233	225	0.213767	-	1	83.4694	307	298	reps	0.319591	0.355671	0.212424	0.214854
Chr2	85648853	85649016	USP39/ENSG00000168883.20/known-exon	0	+	10	0.000650218	0.000650218	0.99935	0.698758	-	1	431.444	186	186	0.855123	-	1	602.048	102	101	reps	0.755902	0.651048	0.849412	0.861761
Chr11	6403208	6403318	APBB1/ENSG00000166313.19/clean	0	-	10	0.000650343	0.99935	0.000650343	0.0461481	-	1	18.675	386	386	0.00853989	NonUniformIntronCover	1	3.075	357	357	reps	0.0236185	0.0754589	0	0.017268
Chr10	97469723	97470128	MMS19/ENSG00000155229.21/clean	0	-	10	0.000650773	0.999349	0.000650773	0.0472324	-	1	29.8931	602	602	0.0123691	NonUniformIntronCover	1	5.77358	461	461	reps	0.0411066	0.0533406	0.0153177	0.0103058
Chr6	30925385	30925543	VARS2/ENSG00000137411.18/clean	0	+	10	0.000652852	0.999347	0.000652852	0.118339	-	1	20.1333	128	128	0.0326564	NonUniformIntronCover	1	7.93333	214	214	reps	0.109328	0.123751	0.025923	0.0447504
Chr8	143613295	143613523	TSTA3/ENSG00000104522.16/clean	0	-	10	0.000654814	0.999345	0.000654814	0.112025	-	1	51.9773	412	412	0.0504481	-	1	22.5795	425	425	reps	0.124417	0.0941597	0.0714252	0.0273019
Chr17	4890735	4890950	MINK1/ENSG00000141503.17/clean	0	+	10	0.000655925	0.999344	0.000655925	0.032634	-	1	15.8554	470	442	0.00506838	NonUniformIntronCover	1	2.27711	447	442	reps	0.021279	0.0554353	0.00793651	0.00173032
Chr22	20107398	20108889	DGCR8/ENSG00000128191.16/anti-near	0	+	10	0.00065642	0.00065642	0.999344	0.0603793	-	1	29.1737	454	452	0.125875	-	1	45.5042	316	310	reps	0.0657911	0.0561237	0.11787	0.142087
Chr17	2336140	2336330	TSR1/ENSG00000167721.11/clean	0	-	10	0.00065762	0.00065762	0.999342	0.043739	-	1	21.6806	426	426	0.0989989	NonUniformIntronCover	1	44.5	391	391	reps	0.0450826	0.0392632	0.0831727	0.13434
ChrX	78137883	78137961	TAF9B/ENSG00000187325.5/clean	0	-	10	0.000659937	0.99934	0.000659937	0.0386266	-	1	11.5714	266	266	0.00503778	-	1	2	394	394	reps	0.0342466	0.0423453	0.00617284	0.00425532
Chr4	141221108	141222365	ZNF330/ENSG00000109445.11/clean	0	+	10	0.000663052	0.000663052	0.999337	0.000410315	NonUniformIntronCover	0.155573	0	364	362	0.0247135	-	1	9.90782	361	359	reps	0.000734983	0.00070029	0.0244984	0.0228562
Chr19	45145260	45145352	PPP1R37/ENSG00000104866.11/anti-near	0	+	10	0.000663957	0.999336	0.000663957	0.298329	-	1	62.5	147	143	0.147818	-	1	28.7941	166	161	reps	0.309485	0.281519	0.208446	0.0675351
Chr12	57745217	57745744	TSPAN31/ENSG00000135452.10/anti-near	0	+	92	0.000663991	0.999336	0.000663991	0.106153	NonUniformIntronCover	1	18.0514	152	128	0.0300214	-	1	8.32571	269	238	reps	0.0520873	0.200844	0.0479977	0.00714286
Chr1	16955550	16955996	CROCC/ENSG00000058453.17/clean	0	+	10	0.000665655	0.999334	0.000665655	0.144157	NonUniformIntronCover	1	10.4432	62	55	0.00188527	-	0.12844	0	68	68	reps	0.144971	0.153846	0.00312291	0
Chr4	112265067	112265733	AP1AR/ENSG00000138660.12/clean	0	+	10	0.00066912	0.999331	0.00066912	0.141025	-	1	16.7462	102	97	0.041602	NonUniformIntronCover	1	10.7652	248	245	reps	0.131696	0.158831	0.0299013	0.0451257
Chr1	1287836	1287938	SCNN1D/ENSG00000162572.21/anti-near	0	+	10	0.000672102	0.999328	0.000672102	0.523013	-	1	6.57895	6	6	0.0862069	-	1	5	53	53	reps	0.453237	0.623762	0.133333	0.0357143
Chr5	177466835	177466910	DBN1/ENSG00000113758.13/clean	0	-	10	0.00067403	0.00067403	0.999326	0.0202045	NonUniformIntronCover	1	15.0741	731	731	0.0500758	-	1	41.5926	789	789	reps	0.0219814	0.0186567	0.0357746	0.0840336
Chr18	74518640	74518948	CNDP2/ENSG00000133313.15/clean	0	+	10	0.000677505	0.999322	0.000677505	0.109708	-	1	28.9583	235	235	0.038876	NonUniformIntronCover	1	12.175	301	299	reps	0.0812313	0.149614	0.043152	0.0324634
Chr16	1420612	1420691	C16orf91/ENSG00000174109.5/anti-near	0	-	10	0.000681664	0.999318	0.000681664	0.568256	-	1	155.31	118	118	0.379239	-	1	101.414	166	166	reps	0.509662	0.620238	0.34613	0.436794
Chr11	763944	764287	TALDO1/ENSG00000177156.11/anti-near	0	+	10	0.000683217	0.999317	0.000683217	0.0361519	-	1	90.2815	2356	2356	0.0213108	-	1	62.7333	2835	2835	reps	0.0248458	0.0557132	0.0211198	0.0203315
Chr12	56601098	56601179	BAZ2A/ENSG00000076108.11/anti-near	0	-	10	0.000684567	0.000684567	0.999315	0.00769691	NonUniformIntronCover	1	6.65517	840	835	0.0289848	-	1	21.5517	698	693	reps	0.0036405	0.0121951	0.0143005	0.0413625
Chr6	43206235	43206320	CUL9/ENSG00000112659.14/clean	0	+	10	0.000686274	0.999314	0.000686274	0.215741	-	1	9.90323	36	33	0.0373832	-	1	4	103	96	reps	0.240373	0.166667	0.0753935	0.0198207
Chr19	49465905	49466081	ALDH16A1/ENSG00000161618.10/clean	0	+	10	0.000686724	0.999313	0.000686724	0.0605445	-	1	6.57353	102	91	0.00279648	-	0.650602	0.867647	232	227	reps	0.0142857	0.144491	0.00552995	0.00235171
Chr3	149162878	149163841	HPS3/ENSG00000163755.9/anti-over	0	+	10	0.000692375	0.000692375	0.999308	0.00141109	NonUniformIntronCover	0.211962	0	150	150	0.0604762	-	1	9.65535	150	148	reps	0.0015778	0.00239048	0.0698346	0.0526812
Chr2	84906117	84906388	TMSB10/ENSG00000034510.6/anti-over	0	+	10	0.000695164	0.999305	0.000695164	0.0102197	-	1	100	9685	9632	0.00626259	NonUniformIntronCover	1	75.5238	11984	11930	reps	0.00823077	0.0128832	0.00626803	0.00609245
Chr5	140563915	140564196	APBB3/ENSG00000113108.19/anti-near	0	-	10	0.000700678	0.000700678	0.999299	0.219719	-	1	21.1193	75	75	0.488216	-	1	48.6514	51	49	reps	0.21693	0.227328	0.482493	0.488352
Chr11	77336282	77337323	PAK1/ENSG00000149269.10/clean	0	-	10	0.000701272	0.999299	0.000701272	0.0229021	NonUniformIntronCover	1	10.9225	466	398	0.00321228	-	0.843841	2.24939	698	695	reps	0.0292532	0.0230085	0.00399318	0.000987344
Chr19	2785678	2790420	THOP1/ENSG00000172009.15/clean	0	+	146	0.000701389	0.000701389	0.999299	0.0331875	NonUniformIntronCover	1	19.8065	577	555	0.0768824	-	1	46.1402	554	540	reps	0.0243001	0.0566138	0.0743299	0.0819749
Chr11	792988	793528	SLC25A22/ENSG00000177542.11/clean	0	-	10	0.000704207	0.000704207	0.999296	0.0270515	NonUniformIntronCover	1	15.7925	568	568	0.0726942	-	1	29.2406	370	370	reps	0.022531	0.0290353	0.0642017	0.0824601
Chr1	201871327	201872827	IPO9/ENSG00000198700.10/clean	0	+	10	0.000708067	0.999292	0.000708067	0.034816	NonUniformIntronCover	0.969799	15.6191	433	378	0.00588274	-	0.827517	2.86409	484	473	reps	0.0261882	0.0453089	0.00729023	0.00584693
Chr22	20089811	20089975	DGCR8/ENSG00000128191.16/clean	0	+	10	0.000710682	0.999289	0.000710682	0.416984	-	1	139.468	164	164	0.279652	-	1	117.242	283	283	reps	0.442313	0.388262	0.290824	0.273944
Chr11	6682815	6683122	MRPL17/ENSG00000158042.9/clean	0	-	10	0.000710948	0.999289	0.000710948	0.0964721	-	1	96.9496	876	873	0.0586083	-	1	68.1092	1058	1058	reps	0.0711095	0.126601	0.0698383	0.0439772
Chr4	947892	948115	TMEM175/ENSG00000127419.17/clean	0	+	10	0.000711522	0.000711522	0.999288	0.12481	-	1	12.2644	86	85	0.322078	-	1	45.6092	96	92	reps	0.146898	0.0989948	0.362637	0.271077
Chr17	3825050	3825766	NCBP3/ENSG00000074356.17/clean	0	-	10	0.000712056	0.999288	0.000712056	0.0449395	-	1	15.1514	306	306	0.00496569	NonUniformIntronCover	0.793201	1.32746	263	263	reps	0.0390496	0.0494532	0.00373616	0.00263236
Chr1	45616703	45617462	NASP/ENSG00000132780.17/anti-near	0	+	10	0.000714136	0.999286	0.000714136	0.0110962	-	1	33.4153	2978	2726	0.0041857	NonUniformIntronCover	1	13.4884	3209	3153	reps	0.00831724	0.015218	0.00476382	0.00397293
ChrX	41170235	41170469	USP9X/ENSG00000124486.13/clean	0	+	10	0.000720699	0.999279	0.000720699	0.0175605	-	1	9.04444	494	494	0.00189133	-	0.839286	1.46667	768	768	reps	0.00524729	0.0241498	0.00373134	0.00094128
Chr2	86484158	86484941	KDM3A/ENSG00000115548.17/clean	0	+	58	0.000723455	0.999277	0.000723455	0.0325681	-	1	7.43986	218	218	0.00104471	NonUniformIntronCover	0.350345	0.127148	334	334	reps	0.0383523	0.0322152	0.00192355	0.000372056
Chr1	151344847	151345105	RFX5/ENSG00000143390.17/anti-near	0	-	10	0.000730871	0.999269	0.000730871	0.0867368	-	1	18.71	180	180	0.020688	NonUniformIntronCover	1	5.07	233	233	reps	0.070488	0.108841	0.0134377	0.0319307
Chr6	30730727	30730918	FLOT1/ENSG00000137312.15/clean	0	-	10	0.000733675	0.000733675	0.999266	0.0207732	-	1	27.4932	1296	1281	0.0440204	-	1	44.2055	960	959	reps	0.0186285	0.0230611	0.0491241	0.0381121
Chr3	13343303	13351878	NUP210/ENSG00000132182.12/clean	0	-	10	0.000734384	0.000734384	0.999266	0.00558883	NonUniformIntronCover	0.955984	3.06303	545	539	0.0303279	-	1	18.9848	607	588	reps	0.00479996	0.0054132	0.0289766	0.0302364
Chr3	49026609	49026686	IMPDH2/ENSG00000178035.12/anti-near	0	-	10	0.000735485	0.999265	0.000735485	0.0376132	-	1	70.7407	1805	1804	0.0210321	-	1	51.5185	2386	2386	reps	0.0330552	0.0425284	0.0255258	0.0167755
Chr17	1732831	1733526	WDR81/ENSG00000167716.18/anti-over	0	+	10	0.000739043	0.999261	0.000739043	0.597365	-	1	34.1236	23	19	0.263951	NonUniformIntronCover	1	26.1782	73	64	reps	0.468804	0.843305	0.320306	0.206377
Chr2	27133337	27133531	PREB/ENSG00000138073.14/anti-near	0	-	10	0.000743727	0.000743727	0.999256	0.0504188	-	1	29.2027	550	535	0.102411	-	1	55.1081	483	476	reps	0.053595	0.0441424	0.0629542	0.192153
Chr4	2831978	2832330	SH3BP2/ENSG00000087266.17/clean	0	+	10	0.000744761	0.000744761	0.999255	0.00235415	-	0.269006	0	107	107	0.0791353	NonUniformIntronCover	1	12.2029	127	127	reps	0.000104417	0.00451671	0.0476577	0.123761
Chr16	15600701	15601990	MARF1/ENSG00000166783.22/anti-over	0	-	10	0.000745737	0.999254	0.000745737	0.209984	MinorIsoform	1	30.0351	62	62	0.0772182	-	1	13.8908	156	156	reps	0.109103	0.342869	0.0924209	0.0694896
ChrX	54922291	54922577	TRO/ENSG00000067445.21/known-exon	0	+	10	0.000745941	0.999254	0.000745941	0.321944	MinorIsoform	1	47.9554	101	62	0.167778	-	1	46.9732	233	212	reps	0.303421	0.340314	0.193865	0.139145
Chr9	137564606	137564892	DPH7/ENSG00000148399.13/known-exon	0	-	10	0.000749954	0.000749954	0.99925	0.0724393	-	1	55.2143	707	542	0.125416	-	1	80.1607	559	496	reps	0.0952074	0.0515436	0.121862	0.130223
Chr14	55000992	55002092	WDHD1/ENSG00000198554.12/clean	0	-	10	0.000754034	0.999246	0.000754034	0.0739216	NonUniformIntronCover	0.93578	6.4656	79	76	0.00213024	-	0.333028	0.114679	156	154	reps	0.0846558	0.0555376	0.0038442	0.00356816
Chr3	129514554	129515487	IFT122/ENSG00000163913.12/clean	0	+	62	0.00075678	0.00075678	0.999243	0.138916	-	1	28.2321	175	171	0.288199	-	1	48.9914	121	116	reps	0.144755	0.125637	0.33449	0.236407
Chr12	56477718	56477932	GLS2/ENSG00000135423.13/known-exon+anti-near+anti-over	0	-	10	0.000757485	0.999243	0.000757485	0.33871	-	1	10.2439	20	19	0.025641	-	0.921569	1	38	38	reps	0.540187	0.266316	0.0454545	0
Chr4	26430522	26430691	RBPJ/ENSG00000168214.20/clean	0	+	10	0.000760107	0.99924	0.000760107	0.0927308	-	1	30.9692	274	274	0.0338062	-	1	12.2462	347	347	reps	0.0884641	0.0913543	0.0401922	0.0306501
Chr4	67492997	67493883	CENPC/ENSG00000145241.11/clean	0	-	10	0.000767448	0.999233	0.000767448	0.310063	-	1	30.5597	55	52	0.109637	NonUniformIntronCover	1	11.0824	88	87	reps	0.314626	0.302727	0.0705895	0.136894
Chr12	125128274	125129334	AACS/ENSG00000081760.17/clean	0	+	10	0.00076782	0.999232	0.00076782	0.104698	-	1	6.08095	51	50	0.00876379	-	0.715238	1.32619	147	147	reps	0.0339646	0.190073	0.00405616	0.00545273
Chr14	56617297	56618593	TMEM260/ENSG00000070269.14/clean	0	+	10	0.000771396	0.999229	0.000771396	0.400889	-	1	19.405	25	25	0.110994	NonUniformIntronCover	1	7.36628	55	53	reps	0.361913	0.410574	0.162547	0.0927299
Chr16	85663614	85665014	GSE1/ENSG00000131149.19/clean	0	+	10	0.000773996	0.999226	0.000773996	0.136833	-	1	43.277	273	253	0.0612789	NonUniformIntronCover	1	24.545	376	372	reps	0.117469	0.164801	0.069653	0.0552481
Chr19	19647528	19647598	ATP13A1/ENSG00000105726.17/clean	0	-	10	0.000777762	0.000777762	0.999222	0.0891058	-	1	47.5417	486	486	0.162041	-	1	67.875	351	351	reps	0.121117	0.0497925	0.163347	0.162901
Chr19	5784053	5784376	PRR22/ENSG00000212123.4/known-exon	0	-	10	0.000779168	0.000779168	0.999221	0.202733	-	1	30.2598	119	119	0.476326	NonUniformIntronCover	1	26.378	29	29	reps	0.200998	0.198862	0.445318	0.614275
ChrX	11763938	11765466	MSL3/ENSG00000005302.19/clean	0	+	284	0.000781669	0.999218	0.000781669	0.443261	-	1	67.6747	84	83	0.219735	-	1	25.3454	90	90	reps	0.405605	0.479317	0.280945	0.177742
Chr2	101011026	101011450	TBC1D8/ENSG00000204634.12/anti-over	0	-	10	0.000783022	0.999217	0.000783022	0.447456	-	1	51.0181	63	63	0.200867	-	1	20.1084	80	80	reps	0.362961	0.510189	0.210919	0.187867
Chr4	103194294	103194373	CENPE/ENSG00000138778.13/clean	0	-	10	0.000788058	0.999212	0.000788058	0.0886076	NonUniformIntronCover	1	7	72	71	0	-	0	0	114	114	reps	0.0294118	0.133333	0	0
Chr5	69116602	69117238	SLC30A5/ENSG00000145740.19/anti-over	0	+	10	0.00078879	0.999211	0.00078879	0.133918	MinorIsoform	1	22.4206	107	105	0.0414622	-	1	9.99206	224	218	reps	0.0716767	0.188702	0.0544607	0.0332964
Chr14	23348306	23348505	SLC22A17/ENSG00000092096.17/clean	0	-	10	0.000791335	0.000791335	0.999209	0.0972555	-	1	4.74026	44	43	0.448687	-	1	17.0909	21	19	reps	0.107664	0.0714286	0.454545	0.447809
Chr11	66850464	66850673	PC/ENSG00000173599.15/anti-near	0	-	10	0.000794185	0.000794185	0.999206	0.0437651	-	1	12.037	261	261	0.134873	-	1	20.1111	129	129	reps	0.0536449	0.032	0.167808	0.101362
Chr12	57731470	57731555	AGAP2/ENSG00000135439.11/anti-near	0	-	10	0.000794733	0.999205	0.000794733	0.700483	LowCover	1	4.67742	2	2	0	-	0	0	16	16	reps	0.666667	0.71028	0	0
Chr5	98885649	98888087	CHD1/ENSG00000153922.10/clean	0	-	10	0.000795171	0.999205	0.000795171	0.146922	NonUniformIntronCover	1	21.356	122	114	0.0366266	-	0.894975	5.85494	154	151	reps	0.165327	0.140523	0.0214765	0.0437832
Chr12	64421471	64423004	XPOT/ENSG00000184575.12/clean	0	+	10	0.000795307	0.999205	0.000795307	0.0430576	NonUniformIntronCover	1	19.5728	424	399	0.0166024	-	1	22.1669	1276	1242	reps	0.0419354	0.0402123	0.0197214	0.0138402
Chr11	46374839	46374933	DGKZ/ENSG00000149091.15/clean	0	+	10	0.000795651	0.999204	0.000795651	0.0138837	-	1	9.91176	702	702	0.000146049	NonUniformIntronCover	0.0952381	0	652	652	reps	0.0269461	0.00263158	0	0.000299401
Chr17	63798099	63799588	DDX42/ENSG00000198231.13/clean	0	+	64	0.000800435	0.000800435	0.9992	0.112273	-	1	79.1716	626	586	0.177351	-	1	117.494	545	479	reps	0.111121	0.115308	0.126365	0.219763
Chr16	31034325	31034461	STX4/ENSG00000103496.15/clean	0	+	10	0.000808217	0.000808217	0.999192	0.101371	-	1	40.3846	358	345	0.191484	-	1	57.0769	241	237	reps	0.104524	0.0966029	0.207041	0.164221
Chr8	144424132	144424214	VPS28/ENSG00000160948.14/clean	0	-	10	0.000810904	0.999189	0.000810904	0.0966337	-	1	68.0333	634	634	0.0531881	-	1	44.2667	782	782	reps	0.0860786	0.12328	0.0728526	0.0268427
Chr15	89321260	89321735	POLG/ENSG00000140521.15/anti-near	0	-	10	0.000815612	0.999184	0.000815612	0.129239	-	1	48.385	255	255	0.0588195	-	1	22.9358	357	357	reps	0.0886994	0.163842	0.0635871	0.0564942
Chr11	107804770	107805358	SLC35F2/ENSG00000110660.15/clean	0	-	10	0.000817065	0.999183	0.000817065	0.104607	NonUniformIntronCover	1	16.8233	144	136	0.0245514	-	1	5.63793	224	220	reps	0.09093	0.115348	0.0117872	0.0369744
Chr4	56450702	56451871	PAICS/ENSG00000128050.8/clean	0	+	30	0.000817782	0.000817782	0.999182	0.00556788	-	1	11.814	2110	2104	0.0154471	-	1	37.4508	2378	2373	reps	0.00472044	0.00665996	0.0156913	0.0145364
Chr20	3576997	3578581	ATRN/ENSG00000088812.18/clean	0	+	10	0.000822437	0.999178	0.000822437	0.099917	NonUniformIntronCover	0.997459	3.44127	31	26	0.00209611	-	0.541931	0.604762	258	256	reps	0.0813236	0.0944852	0.00275708	0.00213726
Chr10	102729808	102731722	SFXN2/ENSG00000156398.13/clean	0	+	70	0.000823762	0.999176	0.000823762	0.163849	NonUniformIntronCover	1	29.5894	151	133	0.0730953	-	0.969631	29.0203	368	359	reps	0.127997	0.238907	0.0697429	0.0670758
Chr17	4181372	4182180	ANKFY1/ENSG00000185722.18/anti-over	0	-	10	0.000824138	0.999176	0.000824138	0.182472	MinorIsoform	1	20.5344	92	59	0.063311	-	1	13.1125	194	178	reps	0.188448	0.200372	0.0306838	0.0918091
Chr9	136992562	136992639	PAXX/ENSG00000148362.11/anti-near	0	+	10	0.000824651	0.999175	0.000824651	0.421772	MinorIsoform	1	632.407	867	640	0.342602	-	1	352.296	676	612	reps	0.401455	0.458772	0.36938	0.280086
Chr5	55952075	55952249	IL6ST/ENSG00000134352.20/clean	0	-	10	0.000826405	0.999174	0.000826405	0.0767694	-	1	6.98485	81	68	0	-	0	0	128	126	reps	0.0833333	0.0748329	0	0
Chr17	740600	741300	TLCD3A/ENSG00000167695.15/anti-near	0	+	10	0.000827026	0.000827026	0.999173	0.0457596	-	1	17.9348	353	353	0.110659	-	1	37.0797	277	277	reps	0.0375342	0.0516851	0.0626879	0.161205
Chr11	57741717	57741808	SELENOH/ENSG00000211450.10/anti-near	0	+	10	0.000830308	0.99917	0.000830308	0.0150573	-	1	40.8788	2664	2662	0.00705644	-	1	29.6061	4166	4161	reps	0.00928443	0.0313834	0.00735035	0.00643555
Chr18	225139	225336	THOC1/ENSG00000079134.12/clean	0	-	58	0.000830852	0.000830852	0.999169	0.210064	-	1	79.2456	297	297	0.342528	-	1	83.8772	158	156	reps	0.172613	0.252533	0.257699	0.420778
ChrX	48815490	48815574	HDAC6/ENSG00000094631.21/clean	0	+	10	0.000832521	0.999167	0.000832521	0.0744102	NonUniformIntronCover	1	9.56667	119	117	0.00606061	-	1	1	164	163	reps	0.0788962	0.0697674	0.0104167	0
Chr3	49116162	49116279	USP19/ENSG00000172046.19/clean	0	-	10	0.000843476	0.000843476	0.999157	0.0053056	NonUniformIntronCover	1	1.74419	327	321	0.0410072	-	1	18.5581	434	424	reps	0.00965003	0	0.0533981	0.0312029
Chr8	18061740	18062278	ASAH1/ENSG00000104763.19/clean	0	-	10	0.000844512	0.999155	0.000844512	0.0810653	-	1	9.17453	104	99	0.00898957	NonUniformIntronCover	1	1.88679	208	207	reps	0.0938019	0.0687868	0.011236	0.00826446
Chr3	49909154	49909252	MON1A/ENSG00000164077.14/anti-over	0	-	10	0.000844969	0.999155	0.000844969	0.426266	-	1	58.6944	79	78	0.211948	-	1	28.7778	107	107	reps	0.395644	0.456311	0.25048	0.15625
Chr2	101266879	101269039	CNOT11/ENSG00000158435.8/anti-near	0	+	10	0.000847136	0.999153	0.000847136	0.0379811	-	1	23.6884	582	582	0.0114098	NonUniformIntronCover	1	8.5407	739	739	reps	0.0376082	0.0363533	0.0102008	0.0103113
Chr16	29805174	29805262	KIF22/ENSG00000079616.13/anti-near	0	+	10	0.000848735	0.000848735	0.999151	0.049355	-	1	39.0938	681	681	0.0978175	-	1	42.7188	390	390	reps	0.0446465	0.056785	0.0949014	0.102703
Chr11	68003798	68003947	UNC93B1/ENSG00000110057.8/clean	0	-	10	0.00085305	0.00085305	0.999147	0.0262355	NonUniformIntronCover	1	2.26316	84	83	0.168597	-	1	13.7895	65	65	reps	0.011124	0.0322581	0.229404	0.100789
Chr15	78001740	78003304	TBC1D2B/ENSG00000167202.11/clean	0	-	10	0.000855371	0.999145	0.000855371	0.296933	-	1	34.6318	82	82	0.127732	-	1	20.9405	143	142	reps	0.27027	0.320053	0.114731	0.148077
Chr12	57746720	57747017	TSPAN31/ENSG00000135452.10/anti-near	0	+	10	0.000858662	0.999141	0.000858662	0.082385	NonUniformIntronCover	1	21.2783	237	237	0.0264415	-	1	10.3478	378	378	reps	0.0546256	0.121121	0.0245566	0.0257013
Chr9	137366632	137367935	EXD3/ENSG00000187609.16/clean	0	-	381	0.000864038	0.999136	0.000864038	0.394483	NonUniformIntronCover	1	54.7243	81	81	0.177508	-	1	18.9919	88	87	reps	0.422248	0.272063	0.13778	0.198809
Chr22	23882646	23882758	SLC2A11/ENSG00000133460.19/clean	0	+	10	0.000865072	0.000865072	0.999135	0.211462	MinorIsoform	1	20.381	11	11	0.515012	-	1	26.5476	25	25	reps	0.21921	0.169492	0.5754	0.43595
Chr14	74287886	74288206	ABCD4/ENSG00000119688.21/clean	0	-	10	0.000868136	0.999132	0.000868136	0.261042	MinorIsoform	1	55.8145	158	108	0.133611	-	1	33.9274	220	201	reps	0.275748	0.243699	0.144296	0.128843
Chr5	96780504	96781057	ERAP1/ENSG00000164307.13/anti-near	0	-	10	0.000868387	0.999132	0.000868387	0.22833	-	1	11.8356	40	40	0.0372965	-	0.734807	2.47945	64	64	reps	0.162594	0.315751	0.0398812	0.0321414
Chr5	10402139	10402383	MARCHF6/ENSG00000145495.16/clean	0	+	10	0.00087061	0.00087061	0.999129	0.00262883	NonUniformIntronCover	0.854701	1.76596	667	667	0.022344	-	1	13.0957	571	571	reps	0.00253264	0.00231481	0.0377559	0.0115303
Chr12	6386162	6386346	LTBR/ENSG00000111321.11/clean	0	+	10	0.00087124	0.00087124	0.999129	0.00481541	NonUniformIntronCover	1	2.7	555	555	0.03255	-	1	13.3571	396	396	reps	0.00406504	0.00570322	0.0337277	0.0313837
Chr6	87675607	87675859	AKIRIN2/ENSG00000135334.9/clean	0	-	10	0.000871297	0.999129	0.000871297	0.0322736	-	1	19.1429	574	574	0.00880468	NonUniformIntronCover	1	6.44898	726	726	reps	0.0406532	0.0257046	0.00682594	0.0114095
Chr17	76088122	76088463	EXOC7/ENSG00000182473.22/clean	0	-	10	0.000874298	0.999126	0.000874298	0.127429	-	1	65.5714	427	427	0.0729548	-	1	55.3233	689	689	reps	0.132557	0.120121	0.0971553	0.0443751
Chr9	134154541	134155339	WDR5/ENSG00000196363.9/clean	0	+	10	0.000877163	0.999123	0.000877163	0.0599874	-	1	87.4272	1370	1351	0.0357433	-	1	65.6108	1770	1753	reps	0.0566781	0.0643615	0.0377994	0.0363443
Chr2	238239747	238239824	HES6/ENSG00000144485.11/known-exon+anti-near+anti-over	0	-	10	0.000878276	0.999122	0.000878276	0.157236	-	1	69.7778	351	351	0.0716113	NonUniformIntronCover	1	18.6667	232	232	reps	0.117959	0.19218	0.0646526	0.0909091
Chr4	77157506	77158532	CCNG2/ENSG00000138764.15/clean	0	+	246	0.000879395	0.000879395	0.999121	0.0420873	NonUniformIntronCover	1	12.3462	279	279	0.119577	-	1	22.8173	163	163	reps	0.0393497	0.0446896	0.147969	0.0817194
Chr2	74475402	74475611	CCDC142/ENSG00000135637.14/anti-near	0	-	10	0.000886255	0.999114	0.000886255	0.385355	-	1	37.6173	60	56	0.184718	-	1	32.1728	142	129	reps	0.398068	0.366858	0.223241	0.133815
Chr19	12679543	12679622	DHPS/ENSG00000095059.16/anti-near	0	-	10	0.000886403	0.999114	0.000886403	0.0829938	-	1	32.3103	357	357	0.0293831	NonUniformIntronCover	1	10.4138	343	343	reps	0.0822529	0.0853954	0.0482321	0.00734985
Chr6	1624231	1624471	GMDS/ENSG00000112699.11/clean	0	-	10	0.000888953	0.000888953	0.999111	0.0167158	NonUniformIntronCover	1	4.25	250	250	0.0744217	-	1	18.0109	224	224	reps	0.0172836	0.01485	0.0603073	0.0899356
Chr17	82033009	82033439	RAC3/ENSG00000169750.9/anti-near	0	+	10	0.000898839	0.999101	0.000898839	0.0325404	-	1	30.8095	916	905	0.0138416	NonUniformIntronCover	1	22.7381	1620	1611	reps	0.0331458	0.0273562	0.0121572	0.0160356
Chr11	117395191	117395546	CEP164/ENSG00000110274.16/clean	0	+	10	0.000900355	0.000900355	0.9991	0.091976	NonUniformIntronCover	1	11.446	113	109	0.259787	-	1	25.9712	74	73	reps	0.0661825	0.138293	0.305094	0.214929
Chr12	112078266	112078633	NAA25/ENSG00000111300.10/clean	0	-	10	0.000900608	0.999099	0.000900608	0.0509662	NonUniformIntronCover	1	9.72028	156	156	0.00440938	-	0.492997	1.06294	230	229	reps	0.07162	0.0397769	0.00510915	0.00252241
Chr9	137175154	137175236	ANAPC2/ENSG00000176248.9/clean	0	-	10	0.000902234	0.999098	0.000902234	0.163712	-	1	100.033	511	509	0.100315	-	1	66.9	600	600	reps	0.153005	0.179537	0.130926	0.0585331
Chr2	37212039	37212334	CEBPZ/ENSG00000115816.15/known-exon+anti-near+anti-over	0	-	10	0.000902997	0.999097	0.000902997	0.0669892	-	1	46.9565	654	623	0.0271792	-	1	14.6957	526	525	reps	0.0312492	0.105841	0.0252179	0.0276771
Chr20	62306734	62307370	ADRM1/ENSG00000130706.13/anti-near	0	+	10	0.000911105	0.999089	0.000911105	0.054495	-	1	101.036	1753	1743	0.0320918	-	1	50.8611	1533	1530	reps	0.0538976	0.0547415	0.0342408	0.0295053
Chr17	28642987	28643163	KIAA0100/ENSG00000007202.15/clean	0	-	10	0.000915955	0.999084	0.000915955	0.176323	-	1	22.6912	106	96	0.0656429	-	1	16.7206	238	231	reps	0.158489	0.195363	0.0893986	0.0445309
Chr20	62320669	62320738	LAMA5/ENSG00000130702.15/clean	0	-	10	0.000919931	0.99908	0.000919931	0.120668	-	1	18.8	134	134	0.0337531	-	1	7.72	218	218	reps	0.136928	0.078341	0.0766481	0
Chr19	49871716	49871811	AKT1S1/ENSG00000204673.10/clean	0	-	10	0.000920901	0.999079	0.000920901	0.0296032	-	1	13.5143	443	430	0.00673401	NonUniformIntronCover	1	4.4	649	641	reps	0.0218978	0.0419209	0.0112705	0
Chr4	55417247	55417802	TMEM165/ENSG00000134851.13/clean	0	+	10	0.000926712	0.000926712	0.999073	0.00792501	NonUniformIntronCover	1	7.14155	891	891	0.028805	-	1	19.2785	650	650	reps	0.00609235	0.00986077	0.0194497	0.0376385
Chr6	104784485	104784984	HACE1/ENSG00000085382.12/clean	0	-	10	0.000929144	0.999071	0.000929144	0.0806442	-	1	7.19289	82	82	0.00315644	-	0.392638	0.233503	124	124	reps	0.0707547	0.0830968	0	0.0044928
Chr7	105536749	105542407	RINT1/ENSG00000135249.8/clean	0	+	275	0.00093484	0.999065	0.00093484	0.187005	-	0.979565	17.9415	70	69	0.0461593	NonUniformIntronCover	0.898012	5.22645	100	99	reps	0.172842	0.182223	0.0544098	0.0356699
ChrX	123696154	123696720	THOC2/ENSG00000125676.20/clean	0	-	10	0.000936632	0.999063	0.000936632	0.0373253	-	1	4.92411	127	126	0	-	0	0	290	290	reps	0.0141437	0.0449701	0	0
ChrX	47185367	47185441	RBM10/ENSG00000182872.16/clean	0	+	10	0.000937999	0.999062	0.000937999	0.0644785	-	1	36.1154	520	520	0.0265381	-	1	17.0385	625	625	reps	0.0423629	0.0953166	0.0235988	0.0298261
Chr10	97466159	97466503	MMS19/ENSG00000155229.21/clean	0	-	10	0.00093845	0.999062	0.00093845	0.0738905	-	1	43.1642	506	465	0.0306963	NonUniformIntronCover	1	15.9925	432	429	reps	0.0616161	0.0918029	0.0253418	0.0350331
Chr11	65131373	65131469	SYVN1/ENSG00000162298.18/anti-near	0	-	10	0.000941054	0.000941054	0.999059	0.0418722	-	1	20.2778	464	462	0.0977803	-	1	34.1389	315	314	reps	0.0542761	0.0284673	0.160429	0.0591133
Chr19	16878390	16878496	SIN3B/ENSG00000127511.9/anti-near	0	+	10	0.000948048	0.999052	0.000948048	0.0587576	-	1	20.975	336	336	0.00881057	-	1	2	225	225	reps	0.0511529	0.0665874	0.0141844	0
Chr17	75901273	75901711	MRPL38/ENSG00000204316.13/anti-near	0	-	10	0.00094819	0.999052	0.00094819	0.12746	-	1	133.808	890	888	0.0836062	-	1	84.4826	906	906	reps	0.0985875	0.161373	0.0800873	0.0858955
Chr3	180962940	180963027	FXR1/ENSG00000114416.18/clean	0	+	10	0.000948353	0.000948353	0.999052	0.145127	-	1	224.258	1321	1316	0.193756	-	1	235.032	978	976	reps	0.118275	0.171049	0.186707	0.200932
Chr12	53292088	53292277	ESPL1/ENSG00000135476.12/clean	0	+	10	0.000949938	0.99905	0.000949938	0.0742754	-	1	15.726	196	170	0.0239011	-	1	13.7123	560	543	reps	0.0758621	0.0692988	0.0506528	0
Chr13	27430621	27432730	GTF3A/ENSG00000122034.16/anti-near	0	+	10	0.00095056	0.999049	0.00095056	0.0656424	-	1	41.1688	586	515	0.0318115	NonUniformIntronCover	1	31.3781	955	900	reps	0.0508823	0.0834409	0.0301878	0.0323104
Chr9	77370332	77370414	VPS13A/ENSG00000197969.14/clean	0	+	10	0.000956065	0.999044	0.000956065	0.0581395	-	1	5	81	81	0	-	0	0	188	188	reps	0.0625	0.0555556	0	0
Chr17	64503098	64503187	DDX5/ENSG00000108654.15/clean	0	-	10	0.000963597	0.000963597	0.999036	0.0142167	-	1	55.0909	3819	3819	0.0236537	-	1	103.061	4254	4252	reps	0.0148676	0.0137775	0.0262411	0.0216935
Chr2	70216292	70216403	TIA1/ENSG00000116001.17/clean	0	-	10	0.000967114	0.999033	0.000967114	0.0460172	-	1	17.3171	316	316	0.00985603	NonUniformIntronCover	1	4.65854	467	467	reps	0.0251359	0.0646001	0.00534759	0.0112878
Chr12	56286023	56286594	AC073896.1/ENSG00000144785.8/clean	0	-	108	0.000974483	0.000974483	0.999026	0.0307903	-	1	60.0107	1889	1879	0.0495051	-	1	135.417	2600	2589	reps	0.0327258	0.029772	0.0471719	0.0530542
Chr17	1679799	1680725	PRPF8/ENSG00000174231.17/clean	0	-	10	0.000979894	0.99902	0.000979894	0.0186408	-	1	11.5109	594	594	0.00364645	NonUniformIntronCover	1	3.89402	1063	1063	reps	0.0159597	0.0197253	0.004394	0.00327757
Chr8	144083500	144083713	GPAA1/ENSG00000197858.11/clean	0	+	26	0.00098064	0.999019	0.00098064	0.24384	-	1	100.933	305	305	0.156128	NonUniformIntronCover	1	91.0267	483	483	reps	0.2396	0.250344	0.215217	0.0946813
Chr2	218698001	218698601	STK36/ENSG00000163482.12/clean	0	+	10	0.000980721	0.999019	0.000980721	0.276378	-	1	19.4788	51	51	0.0891007	-	1	12.7161	129	129	reps	0.313654	0.242493	0.102986	0.0776948
Chr16	670175	670248	RHOT2/ENSG00000140983.14/clean	0	+	10	0.000986553	0.999013	0.000986553	0.150052	-	1	132.407	750	615	0.0990626	-	1	95.1111	865	746	reps	0.151685	0.147459	0.101222	0.0989703
Chr3	141913836	141915969	ATP1B3/ENSG00000069849.11/anti-near	0	+	10	0.00098694	0.999013	0.00098694	0.0335082	-	1	29.4348	849	839	0.0130762	-	1	15.4489	1166	1162	reps	0.0245382	0.042109	0.01296	0.0125182
Chr17	47838002	47838269	SCRN2/ENSG00000141295.14/known-exon+anti-near	0	-	10	0.000986982	0.999013	0.000986982	0.723905	-	1	86.5243	33	26	0.449522	-	1	81.6602	100	85	reps	0.685478	0.701233	0.485872	0.396297
Chr5	55285416	55285695	DHX29/ENSG00000067248.10/anti-over	0	-	10	0.000990224	0.99901	0.000990224	0.0926304	-	1	10.4128	102	101	0.00719424	NonUniformIntronCover	0.977695	1	138	136	reps	0.101434	0.0915315	0.0192308	0.0040429
Chr9	136463740	136464419	SEC16A/ENSG00000148396.18/clean	0	-	10	0.000990393	0.99901	0.000990393	0.0488463	NonUniformIntronCover	1	19.9257	325	325	0.0136467	-	0.899851	6.36431	439	439	reps	0.0525136	0.0421143	0.0190035	0.00667329
Chr6	33202427	33202559	SLC39A7/ENSG00000112473.18/clean	0	+	10	0.00101714	0.998983	0.00101714	0.0227871	-	1	20.94	860	860	0.00678541	-	1	8	1170	1170	reps	0.0159519	0.0298165	0.00529204	0.00825863
Chr16	2001700	2002205	ZNF598/ENSG00000167962.14/anti-near	0	-	10	0.00101855	0.00101855	0.998981	0.0886637	-	1	106.824	1058	1058	0.135017	-	1	110.045	687	687	reps	0.100279	0.0755359	0.116726	0.163499
Chr17	7318356	7318494	NEURL4/ENSG00000215041.10/clean	0	-	10	0.00101861	0.998981	0.00101861	0.116732	-	1	30	227	214	0.0395672	NonUniformIntronCover	1	9.84615	239	220	reps	0.117045	0.115364	0.0494624	0.0268895
Chr6	42967563	42968289	PEX6/ENSG00000124587.14/anti-near	0	-	10	0.00101877	0.998981	0.00101877	0.488455	-	1	40.1042	39	39	0.170791	NonUniformIntronCover	1	9.68056	46	46	reps	0.514743	0.456809	0.200706	0.114064
Chr6	116108435	116110849	NT5DC1/ENSG00000178425.14/clean	0	+	10	0.00102385	0.998976	0.00102385	0.0755256	-	1	11.1923	136	135	0.014603	-	0.972962	4.16424	281	280	reps	0.0442945	0.11929	0.0140641	0.0137408
Chr2	233525562	233527406	USP40/ENSG00000085982.13/clean	0	-	10	0.00102809	0.998972	0.00102809	0.267542	MinorIsoform	0.998364	6.94005	11	11	0.0374165	-	0.948201	2.48774	59	59	reps	0.230315	0.315857	0.0130537	0.0499018
Chr14	101883349	101883431	PPP2R5C/ENSG00000078304.19/clean	0	+	10	0.00102991	0.99897	0.00102991	0.0226629	-	1	8.53333	368	368	0	-	0	0	368	368	reps	0.0337582	0.010929	0	0
ChrX	41345324	41345403	DDX3X/ENSG00000215301.10/clean	0	+	10	0.00103094	0.00103094	0.998969	0.0122974	-	1	30.3793	2440	2435	0.0236209	-	1	62.8276	2596	2596	reps	0.0149626	0.0110776	0.025674	0.0217323
Chr19	7642536	7642765	STXBP2/ENSG00000076944.16/clean	0	+	10	0.00103289	0.998967	0.00103289	0.172578	-	1	24.8202	119	117	0.0476568	-	1	5.40449	108	107	reps	0.151177	0.192235	0.0498911	0.047619
Chr5	180620715	180620875	FLT4/ENSG00000037280.16/clean	0	-	10	0.00103616	0.00103616	0.998964	0.0740091	NonUniformIntronCover	0.906667	3.51667	44	44	0.429251	-	1	12.0333	16	16	reps	0.0349265	0.0909091	0.442231	0.412405
Chr12	65245774	65245860	LEMD3/ENSG00000174106.3/clean	0	+	10	0.00103707	0.998963	0.00103707	0.152613	-	1	27.375	152	145	0.0585159	NonUniformIntronCover	1	16.7812	269	268	reps	0.118581	0.176308	0.0721067	0.0474024
Chr1	228102560	228102642	C1orf35/ENSG00000143793.13/known-exon+anti-near	0	-	10	0.00103717	0.00103717	0.998963	0.0394338	-	1	27.3	663	658	0.0788565	-	1	57.1	667	656	reps	0.0376324	0.0425087	0.0737109	0.0924455
Chr1	1312700	1312786	INTS11/ENSG00000127054.21/anti-near	0	-	10	0.00103806	0.00103806	0.998962	0.207753	-	1	153.406	585	581	0.28812	-	1	199.938	493	492	reps	0.186565	0.24724	0.281172	0.300116
Chr1	16948524	16948798	CROCC/ENSG00000058453.17/clean	0	+	60	0.00104194	0.998958	0.00104194	0.554404	MinorIsoform	1	11.1977	9	6	0.133176	-	1	7.22093	47	42	reps	0.416729	0.819328	0.133065	0.141561
Chr11	126408194	126408306	ST3GAL4/ENSG00000110080.18/clean	0	+	10	0.00104365	0.00104365	0.998956	0	-	0	0	114	114	0.0756534	NonUniformIntronCover	1	7.85714	96	93	reps	0	0	0.0291096	0.129319
Chr8	102298971	102299451	UBR5/ENSG00000104517.13/clean	0	-	10	0.00104527	0.998955	0.00104527	0.0979207	-	1	17.5851	161	161	0.0234264	-	1	4.89362	201	201	reps	0.0685119	0.106766	0.0227018	0.0234375
Chr17	51020258	51021157	SPAG9/ENSG00000008294.21/clean	0	-	11	0.00105249	0.998948	0.00105249	0.0383637	-	1	13.8034	346	346	0.00426467	-	0.859234	1.55899	363	363	reps	0.035753	0.0401675	0.00183798	0.00610071
Chr11	65128488	65128562	SYVN1/ENSG00000162298.18/anti-near	0	-	10	0.00105473	0.00105473	0.998945	0.0695268	-	1	49.6154	664	655	0.129707	-	1	50.0769	336	330	reps	0.0582766	0.0792768	0.140586	0.119147
Chr17	82093771	82095319	FASN/ENSG00000169710.9/clean	0	-	104	0.00105588	0.00105588	0.998944	0.0403834	-	1	47.5536	1126	1125	0.0701018	NonUniformIntronCover	1	85.7145	1123	1123	reps	0.0548538	0.0257612	0.0757682	0.0556082
Chr6	43043630	43044751	CUL7/ENSG00000044090.10/anti-over	0	-	10	0.0010571	0.998943	0.0010571	0.228793	-	1	16.9101	57	57	0.0768952	NonUniformIntronCover	1	13.3281	160	160	reps	0.210387	0.26239	0.148998	0.0477353
Chr4	55417985	55424537	TMEM165/ENSG00000134851.13/anti-near	0	+	189	0.00105825	0.00105825	0.998942	0.00630679	NonUniformIntronCover	0.97014	5.56616	871	871	0.0263108	-	0.987584	15.5375	566	566	reps	0.00389474	0.00827574	0.0232692	0.0271598
Chr6	169721111	169723844	PHF10/ENSG00000130024.15/clean	0	-	10	0.00105853	0.998941	0.00105853	0.0931676	-	1	18.4931	174	172	0.0290598	-	1	10.3556	344	340	reps	0.0543748	0.131225	0.0307761	0.02796
Chr16	56501497	56502316	BBS2/ENSG00000125124.12/clean	0	-	136	0.00106353	0.00106353	0.998936	0.0531992	-	1	9.32727	166	164	0.152367	-	1	30.7382	171	163	reps	0.0593933	0.0312854	0.162342	0.144398
Chr19	13768737	13768823	MRI1/ENSG00000037757.14/anti-near	0	+	10	0.00106458	0.998935	0.00106458	0.0790015	-	1	16.8125	195	195	0.0273755	-	1	16.7188	593	593	reps	0.090788	0.0555556	0.0220588	0.0308403
Chr11	489733	489882	PTDSS2/ENSG00000174915.12/anti-near	0	+	10	0.00106578	0.00106578	0.998934	0.0316463	-	1	14.0526	430	427	0.0796794	-	1	35.9298	415	411	reps	0.0293552	0.0329593	0.0781882	0.0631714
Chr11	47157218	47157812	C11orf49/ENSG00000149179.14/clean	0	+	10	0.00106924	0.998931	0.00106924	0.0879807	-	1	13.1197	135	134	0.0208562	NonUniformIntronCover	0.914384	5.43162	255	255	reps	0.0600815	0.109276	0.0243978	0.0159911
Chr6	33196606	33197761	RXRB/ENSG00000204231.10/clean	0	-	10	0.00107315	0.998927	0.00107315	0.119932	-	1	22.7582	155	155	0.0347634	NonUniformIntronCover	0.970306	7.52723	209	209	reps	0.130364	0.0913169	0.028014	0.0437755
Chr2	43231343	43232712	THADA/ENSG00000115970.18/anti-over	0	-	110	0.00107332	0.00107332	0.998927	0.0231665	NonUniformIntronCover	0.999206	3.03564	128	128	0.126444	-	1	14.9089	103	103	reps	0.00680686	0.0345123	0.112422	0.141871
Chr1	43359638	43359724	CDC20/ENSG00000117399.14/anti-near	0	+	10	0.00107569	0.998924	0.00107569	0.0373958	-	1	70.9375	1826	1816	0.0210761	NonUniformIntronCover	1	43.4688	2019	2015	reps	0.0365013	0.0386576	0.0229777	0.0193971
Chr7	23505569	23505745	TRA2A/ENSG00000164548.11/clean	0	-	10	0.0010801	0.99892	0.0010801	0.0273832	-	1	16.1324	573	573	0.00638226	-	1	5.02941	783	783	reps	0.0193767	0.0363904	0.00796072	0.00613301
Chr6	145943802	145945380	SHPRH/ENSG00000146414.16/clean	0	-	10	0.00108084	0.998919	0.00108084	0.150294	NonUniformIntronCover	1	6.72134	38	37	0.00660487	-	0.578444	0.816879	86	86	reps	0.131797	0.146025	0.0120434	0.00291046
Chr17	7313988	7314079	GPS2/ENSG00000132522.16/anti-near	0	-	10	0.00108406	0.998916	0.00108406	0.144833	-	1	85.697	431	431	0.0866207	-	1	57.0909	586	586	reps	0.117311	0.174568	0.069259	0.106736
Chr11	64224970	64225498	TRPT1/ENSG00000149743.14/anti-near	0	-	10	0.00109008	0.00109008	0.99891	0.132915	-	1	46.2933	287	275	0.225934	-	1	98.9471	323	316	reps	0.129171	0.147826	0.263602	0.191777
Chr12	53289303	53289403	ESPL1/ENSG00000135476.12/clean	0	+	10	0.00109098	0.998909	0.00109098	0.0668858	-	1	14.6944	205	205	0.0187909	-	1	8.69444	449	449	reps	0.058296	0.0827127	0.0140449	0.0265487
Chr11	71994852	71995449	RNF121/ENSG00000137522.18/clean	0	+	20	0.00109463	0.998905	0.00109463	0.141369	-	1	54.9913	334	324	0.065571	-	1	20.0693	284	284	reps	0.149468	0.129264	0.0526775	0.0811344
Chr14	76806849	76807432	ANGEL1/ENSG00000013523.11/clean	0	-	10	0.00109788	0.998902	0.00109788	0.0695988	-	0.938918	3.74026	41	41	0.00229571	NonUniformIntronCover	0.361257	0.155844	154	154	reps	0.0973742	0.0569889	0.00141908	0.0041352
Chr5	132825073	132825162	SHROOM1/ENSG00000164403.14/clean	0	-	10	0.00110359	0.998896	0.00110359	0.392489	-	1	16.1515	25	25	0.134399	-	1	16.303	102	102	reps	0.46539	0.333333	0.137947	0.133953
Chr3	186790064	186790141	RFC4/ENSG00000163918.10/anti-near	0	-	10	0.00110515	0.00110515	0.998895	0.136754	-	1	72.5556	453	453	0.224153	-	1	84.0741	288	288	reps	0.123493	0.153269	0.173031	0.276833
Chr2	71068712	71070501	NAGK/ENSG00000124357.13/clean	0	+	359	0.00110642	0.00110642	0.998894	0.101001	MinorIsoform	1	26.0647	232	59	0.228395	-	1	27.528	93	73	reps	0.0750805	0.11843	0.139975	0.439347
Chr10	12149961	12155777	SEC61A2/ENSG00000065665.21/clean	0	+	207	0.00110651	0.998893	0.00110651	0.374279	MinorIsoform	1	17.3465	29	15	0.121685	-	0.949902	13.0232	94	78	reps	0.321803	0.429657	0.0987277	0.131768
Chr11	125101303	125102131	TMEM218/ENSG00000150433.9/clean	0	-	98	0.00111182	0.00111182	0.998888	0.039616	MinorIsoform	1	4.57877	111	12	0.166485	-	1	27.1644	136	109	reps	0.00994575	0.073212	0.107852	0.278974
Chr16	72099045	72099203	DHX38/ENSG00000140829.12/clean	0	+	10	0.00111339	0.00111339	0.998887	0.0221156	-	1	8.3	367	367	0.0742748	-	1	19.4167	242	242	reps	0.0131029	0.0304474	0.0849299	0.0538462
Chr3	168029302	168029779	GOLIM4/ENSG00000173905.9/clean	0	-	10	0.001115	0.998885	0.001115	0.0649165	-	1	15.5508	222	222	0.0185444	NonUniformIntronCover	1	7.93583	419	419	reps	0.0401068	0.108204	0.0177211	0.0191958
Chr7	101210444	101210531	PLOD3/ENSG00000106397.12/clean	0	-	10	0.00111546	0.998885	0.00111546	0.113849	-	1	14.9032	116	107	0.0306589	NonUniformIntronCover	1	6.48387	205	202	reps	0.133359	0.0869565	0.0421576	0.0146145
Chr2	69843261	69844130	GMCL1/ENSG00000087338.5/clean	0	+	10	0.00112197	0.998878	0.00112197	0.081557	-	1	12.4319	137	137	0.0124046	NonUniformIntronCover	0.923166	2.75072	216	216	reps	0.0832838	0.0872023	0.00763406	0.00243475
Chr1	145995031	145995143	TXNIP/ENSG00000265972.6/clean	0	-	10	0.00112414	0.00112414	0.998876	0.0103676	NonUniformIntronCover	1	5.5	525	525	0.0455923	-	1	15.0476	315	315	reps	0.0117647	0.00970874	0.0153173	0.0521862
Chr6	43045682	43045985	CUL7/ENSG00000044090.10/anti-over	0	-	10	0.00112526	0.998875	0.00112526	0.213152	NonUniformIntronCover	1	14.8992	55	55	0.0656268	-	1	10.395	148	148	reps	0.163281	0.296953	0.0855659	0.0491308
Chr6	43521048	43521181	POLR1C/ENSG00000171453.20/anti-near	0	+	10	0.00112529	0.00112529	0.998875	0.0646938	-	1	42.6078	616	601	0.122268	-	1	52.098	374	359	reps	0.083949	0.0527194	0.129032	0.114913
Chr7	44581823	44582046	TMED4/ENSG00000158604.15/clean	0	-	10	0.00112713	0.00112713	0.998873	0.0737772	-	1	73.8391	927	904	0.118855	-	1	88.6207	657	648	reps	0.071113	0.0750767	0.141364	0.09375
Chr11	27380339	27380639	LGR4/ENSG00000205213.14/clean	0	-	10	0.00112813	0.998872	0.00112813	0.0655738	-	1	16	223	223	0.0139669	NonUniformIntronCover	1	4.00862	283	283	reps	0.0505246	0.0750726	0.0260997	0.00801433
Chr22	50626063	50626153	ARSA/ENSG00000100299.18/clean	0	-	10	0.00112991	0.00112991	0.99887	0.048597	-	1	12.7188	249	244	0.127523	-	1	37.125	254	245	reps	0.0510708	0.043956	0.117899	0.141266
Chr15	69436261	69436563	KIF23/ENSG00000137807.15/clean	0	+	10	0.00113291	0.00113291	0.998867	0.000570451	-	0.380137	0.40678	666	664	0.0134919	NonUniformIntronCover	1	6.72881	492	488	reps	0	0.00100731	0.00256533	0.0241296
Chr13	31151742	31152851	HSPH1/ENSG00000120694.20/clean	0	-	10	0.00113356	0.998866	0.00113356	0.0649815	-	1	41.907	590	590	0.026177	NonUniformIntronCover	1	13.8435	514	514	reps	0.0589719	0.0688748	0.0289399	0.0238627
Chr1	19239302	19239817	EMC1/ENSG00000127463.15/anti-over	0	-	10	0.00113419	0.00113419	0.998866	0.014921	NonUniformIntronCover	1	5.05911	333	328	0.0605085	-	1	19.064	296	294	reps	0.0113263	0.0165891	0.0507956	0.0707621
Chr9	137101672	137106124	MAN1B1/ENSG00000177239.15/anti-near	0	+	191	0.00113936	0.00113936	0.998861	0.129743	-	1	58.2927	389	385	0.211883	-	1	100.818	365	364	reps	0.127405	0.129492	0.164767	0.286565
Chr16	67880216	67880556	EDC4/ENSG00000038358.15/clean	0	+	10	0.00114212	0.998858	0.00114212	0.238045	-	1	108.72	348	325	0.141762	-	1	47.0758	275	271	reps	0.208769	0.28091	0.130504	0.156964
Chr17	81917719	81917829	SIRT7/ENSG00000187531.14/clean	0	-	10	0.00114623	0.00114623	0.998854	0.05463	MinorIsoform	1	21.15	242	238	0.140069	-	1	21.175	114	110	reps	0.0609935	0.0405405	0.140855	0.134734
Chr16	29802937	29803448	KIF22/ENSG00000079616.13/anti-near	0	+	10	0.00115636	0.00115636	0.998844	0.0130974	NonUniformIntronCover	1	15.5274	1170	1132	0.035739	-	1	25.4627	687	660	reps	0.0119517	0.0146445	0.0342159	0.0390713
Chr12	57764926	57765010	CYP27B1/ENSG00000111012.10/anti-near	0	-	10	0.00116156	0.998838	0.00116156	0.175992	NonUniformIntronCover	1	5.76667	27	27	0.0196078	-	0.986486	2	100	100	reps	0.142857	0.203036	0.00961941	0.0248566
Chr12	68692112	68696818	NUP107/ENSG00000111581.10/clean	0	+	10	0.00116454	0.998835	0.00116454	0.0268215	-	1	12.8984	468	450	0.00418606	NonUniformIntronCover	0.92632	2.63989	628	624	reps	0.0300583	0.0206711	0.00677159	0.00135023
Chr17	45245416	45245631	FMNL1/ENSG00000184922.14/anti-over	0	+	23	0.00116506	0.00116506	0.998835	0.0715821	-	1	5.55128	72	68	0.293958	MinorIsoform	1	16.6538	40	30	reps	0.0541045	0.130435	0.283546	0.308294
Chr15	74840316	74840497	ULK3/ENSG00000140474.14/known-exon	0	-	10	0.00117448	0.00117448	0.998826	0.445145	-	1	148.42	168	168	0.604872	-	1	270.957	171	167	reps	0.414712	0.4882	0.598323	0.611367
Chr9	137064787	137064862	SAPCD2/ENSG00000186193.9/anti-near	0	-	10	0.00117779	0.998822	0.00117779	0.120045	-	1	35.3333	259	245	0.056512	-	1	32.7037	546	533	reps	0.123711	0.110659	0.0491895	0.0678523
ChrX	41214709	41215898	USP9X/ENSG00000124486.13/clean	0	+	10	0.0012096	0.0012096	0.99879	0.00438965	NonUniformIntronCover	0.759966	3.45666	778	778	0.0193648	-	1	18.5624	936	933	reps	0.00529078	0.00129872	0.0202632	0.0174582
Chr7	93257464	93258158	VPS50/ENSG00000004766.17/clean	0	+	10	0.00121019	0.99879	0.00121019	0.178499	-	1	12.1679	56	56	0.00474473	-	0.219298	0	46	46	reps	0.125568	0.207176	0	0.00986972
Chr17	75619799	75619878	MYO15B/ENSG00000266714.9/known-exon	0	+	10	0.00121501	0.998785	0.00121501	0.530744	-	1	5.65517	5	5	0.0473062	-	1	1.24138	25	25	reps	0.101562	1	0.101408	0
Chr13	27434219	27434804	GTF3A/ENSG00000122034.16/anti-near	0	+	10	0.00122604	0.998774	0.00122604	0.0537404	NonUniformIntronCover	1	33.3939	572	572	0.0230153	-	1	21.6494	919	917	reps	0.0529755	0.0574013	0.0252199	0.0217402
Chr1	214331070	214332017	SMYD2/ENSG00000143499.14/clean	0	+	10	0.00122847	0.998772	0.00122847	0.256464	-	1	34.8373	101	101	0.124907	-	1	33.4	234	234	reps	0.238185	0.274398	0.122731	0.12356
Chr7	143264167	143264547	GSTK1/ENSG00000197448.14/anti-over	0	+	10	0.00122848	0.998772	0.00122848	0.129561	NonUniformIntronCover	1	40.7838	274	269	0.065044	-	1	34.9932	503	501	reps	0.0893882	0.192773	0.052991	0.0731857
Chr3	10064875	10065393	FANCD2/ENSG00000144554.10/clean	0	+	10	0.00123426	0.998766	0.00123426	0.097324	-	1	20.3775	185	185	0.0186335	NonUniformIntronCover	1	3	158	158	reps	0.0868042	0.118339	0.0316643	0.00387017
Chr14	60115461	60115718	PCNX4/ENSG00000126773.13/clean	0	+	10	0.00123443	0.998766	0.00123443	0.20247	NonUniformIntronCover	1	19.0404	57	57	0.0656965	-	1	10.899	144	144	reps	0.190515	0.210246	0.112392	0.038835
Chr17	4894311	4894524	MINK1/ENSG00000141503.17/anti-near	0	+	10	0.00124015	0.99876	0.00124015	0.175099	-	1	77.2651	364	348	0.0945759	NonUniformIntronCover	1	33.8434	324	323	reps	0.150208	0.211387	0.106176	0.0828729
Chr1	1753060	1753566	NADK/ENSG00000008130.15/clean	0	-	10	0.00124276	0.998757	0.00124276	0.0655261	-	1	52.24	745	720	0.0327493	NonUniformIntronCover	1	28.17	832	815	reps	0.0557239	0.0806214	0.0287115	0.0353128
Chr9	37426654	37428483	GRHPR/ENSG00000137106.18/clean	0	+	10	0.00124531	0.998755	0.00124531	0.037251	-	1	23.0219	595	563	0.0122046	NonUniformIntronCover	1	10.5021	844	837	reps	0.0328802	0.0449667	0.0127624	0.0115827
ChrX	54813024	54813117	MAGED2/ENSG00000102316.17/clean	0	+	10	0.00125978	0.99874	0.00125978	0.0421979	-	1	27.8	631	630	0.0184427	-	1	25.6286	1364	1359	reps	0.0416726	0.0422788	0.023665	0.0150155
Chr19	18853071	18853251	UPF1/ENSG00000005007.13/clean	0	+	43	0.00126541	0.998735	0.00126541	0.0477672	-	1	23.7273	467	466	0.0156009	NonUniformIntronCover	1	8.27273	427	427	reps	0.0339623	0.0648155	0.022623	0.00790514
Chr7	56061849	56062682	CCT6A/ENSG00000146731.11/clean	0	+	10	0.00126679	0.998733	0.00126679	0.0711234	-	1	204.746	2664	2661	0.0521361	-	1	174.692	3145	3145	reps	0.0748145	0.0667055	0.0536009	0.0487443
Chr15	74838192	74838265	ULK3/ENSG00000140474.14/clean	0	-	10	0.00126799	0.998732	0.00126799	0.172663	-	1	37.1481	178	152	0.0797264	-	1	25.037	289	256	reps	0.142963	0.22439	0.108974	0.0506329
Chr19	40590422	40590729	SHKBP1/ENSG00000160410.15/clean	0	+	10	0.00126942	0.998731	0.00126942	0.121169	-	1	57.9076	419	387	0.0589135	-	1	22.9748	367	345	reps	0.117858	0.134499	0.0928765	0.0253766
Chr13	110634595	110634671	NAXD/ENSG00000213995.11/clean	0	+	10	0.00127917	0.998721	0.00127917	0.596059	-	1	121	82	80	0.386789	-	1	78.2143	124	124	reps	0.54652	0.64672	0.366398	0.413552
Chr1	228283284	228283502	OBSCN/ENSG00000154358.21/clean	0	+	10	0.00128521	0.998715	0.00128521	0.359667	NonUniformIntronCover	1	6.17857	11	11	0	-	0	0	27	27	reps	0.157895	0.628866	0	0
Chr6	33680454	33680554	ITPR3/ENSG00000096433.11/clean	0	+	10	0.00129866	0.998701	0.00129866	0.10015	-	1	16.6944	150	150	0.0206746	NonUniformIntronCover	1	3.69444	175	175	reps	0.106383	0.0910482	0.0350289	0.00229358
Chr2	74464722	74464895	MOGS/ENSG00000115275.14/anti-near	0	-	10	0.00130073	0.00130073	0.998699	0.0564646	-	1	18.8507	276	276	0.130932	NonUniformIntronCover	1	38.4179	234	234	reps	0.0694444	0.0381679	0.136095	0.120968
Chr2	181918675	181918754	ITPRID2/ENSG00000138434.17/clean	0	+	10	0.00130308	0.998697	0.00130308	0.147347	-	1	30.069	174	156	0.0511745	-	1	10.5172	195	189	reps	0.18392	0.127708	0.0417881	0.0592954
Chr7	152154445	152155909	KMT2C/ENSG00000055609.18/clean	0	-	117	0.00130365	0.998696	0.00130365	0.116992	-	1	7.6846	54	54	0.0142228	-	0.780995	1.48609	100	100	reps	0.0957324	0.116979	0.0431726	0.00468923
Chr17	2701265	2701365	CLUH/ENSG00000132361.17/clean	0	-	10	0.00131049	0.99869	0.00131049	0.019941	NonUniformIntronCover	1	9.58333	471	468	0.00176056	-	0.933333	1	567	564	reps	0.0115298	0.0279028	0.00294985	0
Chr6	33195702	33195906	RXRB/ENSG00000204231.10/clean	0	-	10	0.00131058	0.998689	0.00131058	0.392375	-	1	164.667	255	246	0.274293	-	1	121.705	322	318	reps	0.415309	0.332873	0.285756	0.266182
Chr9	128714121	128714196	PKN3/ENSG00000160447.7/clean	0	+	10	0.001313	0.998687	0.001313	0.0840191	-	1	21.5556	224	220	0.0308973	-	1	12.3704	388	382	reps	0.0899596	0.0730897	0.0520901	0.00114811
Chr22	50261296	50261384	MAPK12/ENSG00000188130.14/clean	0	-	22	0.00131567	0.00131567	0.998684	0.108941	NonUniformIntronCover	1	23.1071	189	188	0.21142	-	1	97.8571	365	353	reps	0.0812384	0.157797	0.223599	0.197928
Chr2	201624322	201626025	TMEM237/ENSG00000155755.19/clean	0	-	10	0.00131839	0.998682	0.00131839	0.0515641	-	1	16.0928	296	267	0.00934606	NonUniformIntronCover	0.825753	2.90574	308	307	reps	0.0490106	0.0483712	0.0109116	0.00684531
Chr17	63824239	63824330	FTSJ3/ENSG00000108592.17/anti-near	0	-	10	0.00132363	0.998676	0.00132363	0.0248447	-	1	4	157	157	0	-	0	0	445	445	reps	0.00148522	0.0512821	0	0
Chr9	35813145	35813265	HINT2/ENSG00000137133.11/known-exon+anti-near	0	-	10	0.00132797	0.998672	0.00132797	0.343678	-	1	91.1136	169	169	0.224114	-	1	108.318	359	359	reps	0.343551	0.344507	0.186441	0.251971
Chr12	124947887	124948083	DHX37/ENSG00000150990.8/known-exon	0	-	10	0.00133702	0.00133702	0.998663	0.00299401	-	1	1	333	333	0.0375587	NonUniformIntronCover	1	8	205	205	reps	0	0.00512821	0.046875	0.0236805
Chr3	49841072	49841825	TRAIP/ENSG00000183763.9/clean	0	-	10	0.00134173	0.998658	0.00134173	0.34377	-	1	25.6689	40	40	0.137414	NonUniformIntronCover	1	16.8863	95	94	reps	0.32084	0.391913	0.123253	0.165514
Chr12	49104885	49105923	LMBR1L/ENSG00000139636.15/clean	0	-	10	0.00134794	0.00134794	0.998652	0.0433397	NonUniformIntronCover	1	8.51699	174	170	0.143738	-	1	19.8083	116	112	reps	0.0224236	0.0707946	0.121466	0.156078
Chr12	120156604	120156911	GCN1/ENSG00000089154.11/clean	0	-	10	0.0013513	0.998649	0.0013513	0.0400422	-	1	20.7311	488	487	0.012032	-	1	6.47899	523	523	reps	0.026652	0.0568573	0.0145821	0.0101235
Chr7	23196766	23199457	NUP42/ENSG00000136243.17/anti-near	0	+	284	0.00135166	0.998648	0.00135166	0.0941141	-	1	26.0768	250	221	0.0341823	-	0.993768	11.9979	339	313	reps	0.0717753	0.106316	0.0267951	0.0383721
Chr9	136429807	136430276	INPP5E/ENSG00000148384.13/clean	0	-	10	0.00135352	0.998646	0.00135352	0.14675	NonUniformIntronCover	1	61.4	333	333	0.0784506	-	1	37.627	429	425	reps	0.156368	0.135514	0.0881509	0.0624708
Chr19	990364	990851	WDR18/ENSG00000065268.11/clean	0	+	10	0.00135403	0.998646	0.00135403	0.0941458	-	1	43.8586	422	415	0.0440537	-	1	22.8115	495	481	reps	0.0925127	0.0942001	0.0521092	0.0336088
Chr11	125608289	125609433	STT3A/ENSG00000134910.14/clean	0	+	10	0.001368	0.998632	0.001368	0.0327829	-	1	19.0485	548	542	0.00904022	-	1	6.75991	737	736	reps	0.0189349	0.050835	0.00594222	0.0130722
Chr1	151136163	151136447	SEMA6C/ENSG00000143434.15/clean	0	-	10	0.00137174	0.998628	0.00137174	0.0975005	NonUniformIntronCover	1	4.64545	43	33	0.00506846	-	0.489051	0.472727	96	88	reps	0.0773263	0.136947	0.00598585	0.00454133
Chr19	13956262	13956351	DCAF15/ENSG00000132017.10/clean	0	+	10	0.00138014	0.00138014	0.99862	0.0182804	NonUniformIntronCover	1	7.9697	428	427	0.0599024	-	1	18.6061	292	291	reps	0.0232725	0.0119107	0.0654762	0.049904
Chr11	62391632	62392078	ASRGL1/ENSG00000162174.12/anti-over	0	+	58	0.00138076	0.998619	0.00138076	0.10662	-	1	22.7949	190	186	0.0387086	NonUniformIntronCover	1	11.4359	284	280	reps	0.0959091	0.12953	0.0434478	0.0353416
Chr6	35291737	35292553	ZNF76/ENSG00000065029.15/clean	0	+	24	0.00138977	0.00138977	0.99861	0.18088	-	1	46.8145	212	200	0.321647	-	1	65.434	138	128	reps	0.166676	0.191475	0.294968	0.33792
Chr22	41527420	41527900	ACO2/ENSG00000100412.16/known-exon+anti-near+anti-over	0	+	10	0.00139682	0.00139682	0.998603	0.246335	-	1	131.394	400	400	0.337307	-	1	265.186	520	520	reps	0.264565	0.215799	0.360466	0.307927
Chr19	43733733	43734388	SMG9/ENSG00000105771.14/clean	0	-	10	0.00140412	0.998596	0.00140412	0.0772598	NonUniformIntronCover	1	5.861	70	70	0.0115471	-	0.986047	3.18919	273	273	reps	0.080836	0.06359	0.0109622	0.0116426
Chr16	69754726	69754847	NOB1/ENSG00000141101.13/clean	0	-	10	0.00140524	0.998595	0.00140524	0.153376	-	1	44.0222	242	242	0.050885	NonUniformIntronCover	1	7.66667	143	143	reps	0.158416	0.146789	0.0573566	0.00788644
Chr18	691276	693881	ENOSF1/ENSG00000132199.20/clean	0	-	273	0.00140871	0.00140871	0.998591	0.290735	MinorIsoform	1	51.2388	55	55	0.47463	-	1	113.831	113	102	reps	0.32795	0.234083	0.404069	0.541814
Chr17	42554582	42554668	HSD17B1/ENSG00000108786.10/known-exon	0	+	10	0.00140999	0.00140999	0.99859	0.46871	-	1	126.156	143	143	0.651661	-	1	220.75	118	118	reps	0.433485	0.546776	0.638361	0.670251
Chr12	29341218	29341733	ERGIC2/ENSG00000087502.18/anti-near	0	-	10	0.00141244	0.998588	0.00141244	0.038358	-	1	13.1232	329	328	0.00746387	NonUniformIntronCover	1	3.25616	433	433	reps	0.0405757	0.0355546	0.00819848	0.00686636
Chr6	31625871	31626019	PRRC2A/ENSG00000204469.13/clean	0	+	10	0.00141316	0.998587	0.00141316	0.0272566	-	1	33.2321	1151	1151	0.0112642	-	1	15.3571	1325	1325	reps	0.0316206	0.0223903	0.0193344	0.00306669
Chr10	102400194	102400277	NFKB2/ENSG00000077150.20/anti-near	0	+	10	0.00141839	0.998582	0.00141839	0.0833333	-	1	28	308	304	0.0160899	NonUniformIntronCover	0.958904	2.35484	144	144	reps	0.0948905	0.0749086	0.00301898	0.0458543
Chr2	219220892	219221079	ATG9A/ENSG00000198925.12/clean	0	-	10	0.00142111	0.00142111	0.998579	0.00474283	NonUniformIntronCover	1	2.53521	530	530	0.0346024	-	1	10.3944	290	290	reps	0.00174835	0.00854701	0.0407554	0.0264184
Chr2	71424038	71424649	ZNF638/ENSG00000075292.19/clean	0	+	10	0.00142385	0.998576	0.00142385	0.018821	NonUniformIntronCover	1	6.71369	329	329	0.000458921	-	0.207987	0	447	447	reps	0.0221745	0.0170895	0.000227994	0.000811788
Chr14	22770278	22770460	OXA1L/ENSG00000155463.14/anti-near	0	+	10	0.00142871	0.998571	0.00142871	0.251868	-	1	228.257	678	677	0.183916	-	1	150.543	667	667	reps	0.243374	0.259519	0.224328	0.155056
Chr18	59333244	59338556	LMAN1/ENSG00000074695.6/clean	0	-	10	0.00143065	0.00143065	0.998569	0.0104203	NonUniformIntronCover	1	14.205	1344	1344	0.025827	-	1	31.9731	1194	1194	reps	0.00923341	0.0104496	0.0207826	0.0283266
Chr15	64821281	64821366	PIF1/ENSG00000140451.13/clean	0	-	10	0.001432	0.998568	0.001432	0.517275	MinorIsoform	1	34.2903	32	17	0.251598	-	1	34.2903	102	89	reps	0.449421	0.63144	0.260304	0.245469
Chr1	161119952	161120106	NIT1/ENSG00000158793.14/anti-near	0	+	10	0.00144253	0.998557	0.00144253	0.0303894	-	1	8.08621	258	258	0.00243309	NonUniformIntronCover	0.868056	1	410	410	reps	0.0265354	0.0503627	0	0.00403226
Chr2	197494752	197495293	HSPD1/ENSG00000144381.17/clean	0	-	10	0.00144293	0.00144293	0.998557	0.0126376	NonUniformIntronCover	1	72.0094	5598	5598	0.0193419	-	1	135.559	6854	6854	reps	0.0103386	0.0150155	0.0233342	0.0162762
Chr1	44757971	44758048	KIF2C/ENSG00000142945.13/anti-near	0	+	10	0.00145438	0.00145438	0.998546	0.00343171	-	1	3.33333	964	964	0.0170411	-	1	13.037	752	750	reps	0.00314995	0.0035791	0.00882353	0.0236145
Chr17	28858486	28858575	ERAL1/ENSG00000132591.12/clean	0	+	10	0.00146044	0.99854	0.00146044	0.046938	-	1	25.7576	523	462	0.0156624	NonUniformIntronCover	1	9.51515	598	584	reps	0.0432166	0.0514706	0.0127389	0.0183846
Chr12	48774518	48774690	ADCY6/ENSG00000174233.11/clean	0	-	10	0.00146982	0.00146982	0.99853	0.034678	NonUniformIntronCover	1	4.45455	124	115	0.134843	-	1	22.2879	143	141	reps	0.029098	0.0497382	0.146184	0.125358
Chr7	23317713	23319137	IGF2BP3/ENSG00000136231.14/clean	0	-	10	0.00147335	0.998527	0.00147335	0.168961	NonUniformIntronCover	1	32.3269	152	146	0.0799989	-	1	31.3039	360	344	reps	0.153012	0.190328	0.0786013	0.0756172
Chr1	214332192	214334199	SMYD2/ENSG00000143499.14/known-exon	0	+	10	0.0014821	0.998518	0.0014821	0.23258	MinorIsoform	1	38.1865	95	94	0.10636	-	0.985478	23.5657	193	193	reps	0.233681	0.233649	0.0623803	0.143666
Chr19	10115585	10115683	EIF3G/ENSG00000130811.12/anti-near	0	-	10	0.00148342	0.998517	0.00148342	0.0312651	-	1	41.4722	1277	1277	0.0145985	-	1	25.5556	1723	1723	reps	0.0216913	0.0456471	0.0167275	0.0117035
ChrX	49075753	49075865	AC231657.3/ENSG00000288053.1/clean	0	-	10	0.00148701	0.998513	0.00148701	0.0170046	-	1	8.66667	428	423	0.000669905	-	0.313725	0.047619	425	424	reps	0.00973318	0.0260356	0	0.00151329
Chr16	88734798	88734874	PIEZO1/ENSG00000103335.22/anti-over	0	-	10	0.00149435	0.00149435	0.998506	0	NonUniformIntronCover	0	0	594	588	0.0142096	-	1	8	545	544	reps	0	0	0.0141343	0.0142857
Chr14	24188638	24188718	IPO4/ENSG00000196497.17/anti-near	0	-	21	0.00149902	0.998501	0.00149902	0.0548303	-	1	21	362	356	0.0129057	NonUniformIntronCover	1	4.04	309	307	reps	0.0564103	0.0531915	0.0112682	0.0151515
Chr15	74627446	74627538	CLK3/ENSG00000179335.18/anti-near	0	+	10	0.00149986	0.00149986	0.9985	0.00121298	-	0.292683	0	239	239	0.0329692	NonUniformIntronCover	1	9.85294	289	289	reps	0	0.00247423	0.048644	0.0185185
Chr11	62598141	62598326	MTA2/ENSG00000149480.7/clean	0	-	10	0.00150844	0.00150844	0.998492	0.0345574	-	1	55.338	1546	1524	0.0566438	-	1	87.6056	1459	1459	reps	0.0425555	0.0234925	0.0637728	0.0475419
Chr19	49015686	49015816	RUVBL2/ENSG00000183207.14/anti-near	0	+	10	0.0015147	0.998485	0.0015147	0.0425121	-	1	44	991	984	0.0174263	-	1	13	733	729	reps	0.0370312	0.0479696	0.0202394	0.0114504
Chr19	45406718	45407093	CD3EAP/ENSG00000117877.10/known-exon+anti-near	0	+	16	0.00151705	0.998483	0.00151705	0.279932	-	1	28.3793	58	57	0.104995	NonUniformIntronCover	1	11.4966	76	76	reps	0.276808	0.283698	0.122385	0.094693
Chr22	46289561	46289825	TTC38/ENSG00000075234.17/clean	0	+	10	0.00152045	0.00152045	0.99848	0.0117929	NonUniformIntronCover	1	6.37255	528	528	0.0439771	-	1	11.5	250	248	reps	0.0142439	0.00998114	0.0311376	0.0657017
Chr11	47172333	47173425	ARFGAP2/ENSG00000149182.15/clean	0	-	62	0.00152819	0.998472	0.00152819	0.0544262	MinorIsoform	1	27.801	483	252	0.0233291	-	1	19.2524	806	760	reps	0.0529585	0.0575301	0.0250365	0.0245133
Chr22	49913517	49913603	ALG12/ENSG00000182858.14/clean	0	-	10	0.00153277	0.998467	0.00153277	0.0504775	-	1	9.25	174	174	0.00442593	-	0.881579	1.0625	238	238	reps	0.0481928	0.0535492	0.00849575	0
Chr13	99983139	99984945	ZIC2/ENSG00000043355.12/clean	0	+	357	0.0015357	0.0015357	0.998464	0.0485301	NonUniformIntronCover	1	29.2771	566	562	0.0984703	-	1	42.4888	382	379	reps	0.0483947	0.0467333	0.0722767	0.129894
Chr22	35421460	35423213	MCM5/ENSG00000100297.16/clean	0	+	10	0.00153724	0.00153724	0.998463	0.0166668	-	1	24.5765	1450	1446	0.0339068	-	1	53.6981	1530	1525	reps	0.0151779	0.0172009	0.02782	0.0380483
Chr3	158821653	158821983	MFSD1/ENSG00000118855.21/clean	0	+	10	0.00153894	0.998461	0.00153894	0.0573533	NonUniformIntronCover	1	14.0547	231	223	0.0108002	-	1	3.51562	322	321	reps	0.0294251	0.0945818	0.0155039	0.00771249
Chr16	1778321	1778434	SPSB3/ENSG00000162032.16/known-exon+anti-near+anti-over	0	-	10	0.0015579	0.0015579	0.998442	0.403916	-	1	305.605	442	439	0.521196	-	1	242.744	218	218	reps	0.448143	0.340705	0.545282	0.488842
Chr1	26767999	26771118	ARID1A/ENSG00000117713.20/clean	0	+	10	0.00156107	0.998439	0.00156107	0.0786682	NonUniformIntronCover	1	10.9293	127	127	0.021783	-	1	8.46185	380	380	reps	0.10281	0.0493302	0.0259121	0.0177937
ChrX	48816052	48816140	HDAC6/ENSG00000094631.21/clean	0	+	10	0.00156539	0.998435	0.00156539	0.0877193	-	1	10	99	99	0.0120482	-	1	2	164	164	reps	0.0933333	0.0769231	0	0.025641
Chr9	35076870	35076970	FANCG/ENSG00000221829.10/clean	0	-	10	0.00157138	0.998429	0.00157138	0.21815	-	1	31.25	112	109	0.0974695	NonUniformIntronCover	1	23.1111	208	208	reps	0.199179	0.234389	0.0972321	0.1
Chr16	1771410	1771488	NME3/ENSG00000103024.7/known-exon+anti-near	0	-	10	0.00157226	0.998428	0.00157226	0.570936	-	1	762.464	572	571	0.479337	-	1	451.107	490	485	reps	0.572374	0.565932	0.498518	0.450353
Chr7	155297959	155298258	INSIG1/ENSG00000186480.13/clean	0	+	78	0.00157593	0.998424	0.00157593	0.0455666	-	1	12.4607	239	239	0.00987472	NonUniformIntronCover	0.846154	4.34831	416	416	reps	0.0548988	0.0390108	0.00973574	0.010058
Chr9	136392594	136392672	SNAPC4/ENSG00000165684.4/clean	0	-	10	0.0015787	0.998421	0.0015787	0.142716	-	1	41.2857	239	239	0.0646168	-	1	19.9643	288	288	reps	0.0916031	0.185386	0.0657371	0.0624049
Chr7	100887200	100887319	SRRT/ENSG00000087087.20/anti-near	0	+	10	0.00157923	0.00157923	0.998421	0.0185713	NonUniformIntronCover	1	19.2444	1017	1017	0.0416977	-	1	37.3333	858	858	reps	0.0242887	0.0121836	0.0433572	0.0421207
Chr12	19518113	19518674	AEBP2/ENSG00000139154.16/known-exon	0	+	89	0.00158355	0.00158355	0.998416	0.567744	-	1	168.121	128	124	0.756694	NonUniformIntronCover	1	270.574	87	85	reps	0.702699	0.474412	0.776777	0.739988
Chr12	53061264	53061379	TNS2/ENSG00000111077.18/anti-near	0	+	10	0.00158796	0.998412	0.00158796	0.285714	LowCover	1	2	5	5	0	-	0	0	53	52	reps	0.2	0.5	0	0
Chr22	19138317	19139158	ESS2/ENSG00000100056.12/clean	0	-	172	0.00158856	0.998411	0.00158856	0.0977135	-	1	23.0669	182	182	0.0343026	NonUniformIntronCover	1	10.3011	284	284	reps	0.0970931	0.0975193	0.04947	0.019698
Chr9	5066789	5069021	JAK2/ENSG00000096968.14/clean	0	+	10	0.0016	0.9984	0.0016	0.689408	LowCover	1	4.43933	2	2	0.0483496	-	0.667417	1.16854	22	22	reps	1	0.539457	0.031748	0.034464
Chr16	3115568	3115828	ZNF205/ENSG00000122386.10/known-exon+anti-near+anti-over	0	+	10	0.00161372	0.998386	0.00161372	0.0779605	NonUniformIntronCover	1	22.66	268	258	0.0227343	-	1	6.63	285	271	reps	0.0767045	0.0798675	0.0231391	0.0217793
Chr3	113013403	113013952	NEPRO/ENSG00000163608.15/anti-over	0	-	14	0.00161782	0.00161782	0.998382	0.0177693	-	1	3.27442	181	167	0.0826385	-	1	15.6744	165	159	reps	0.0131354	0.0256798	0.0519908	0.0930058
Chr1	45566688	45566868	AKR1A1/ENSG00000117448.13/clean	0	+	10	0.001626	0.998374	0.001626	0.0504955	-	1	26.75	503	411	0.0185254	NonUniformIntronCover	1	10.9853	582	578	reps	0.0496007	0.0515537	0.0168751	0.0216606
Chr12	120155040	120155240	GCN1/ENSG00000089154.11/clean	0	-	10	0.0016303	0.99837	0.0016303	0.0196864	-	1	10.3421	513	510	0	-	0	0	416	415	reps	0.0133779	0.026662	0	0
Chr17	35264903	35265071	SLFN5/ENSG00000166750.10/clean	0	+	10	0.00163429	0.998366	0.00163429	0.309206	MinorIsoform	1	7.60938	11	11	0	-	0	0	25	25	reps	0.3	0.315508	0	0
Chr11	67285188	67285285	GRK2/ENSG00000173020.11/clean	0	+	10	0.00163614	0.998364	0.00163614	0.0366972	-	1	37.3714	981	981	0.0154766	-	1	15.9714	1016	1016	reps	0.0317654	0.0455796	0.0220075	0.00819672
Chr1	91511923	91513057	CDC7/ENSG00000097046.13/clean	0	+	10	0.00163803	0.998362	0.00163803	0.0528699	-	1	8.87556	159	131	0.0106511	NonUniformIntronCover	0.963523	4.78	444	434	reps	0.0222705	0.0667016	0.00581395	0.0138471
Chr14	24178916	24179084	REC8/ENSG00000100918.13/anti-near	0	+	10	0.00164304	0.00164304	0.998357	0.0588235	-	0.981013	1	16	16	0.655544	-	1	9.51562	5	5	reps	0.00753769	0.0833333	0.5	0.716814
Chr19	38915749	38915840	AC011455.2/ENSG00000269547.1/clean	0	-	10	0.00165347	0.998347	0.00165347	0.211816	-	1	20.4242	74	73	0.0802292	-	1	18.6667	214	208	reps	0.226837	0.203019	0.122052	0.0428855
Chr19	12655879	12656570	MAN2B1/ENSG00000104774.13/clean	0	-	10	0.0016594	0.998341	0.0016594	0.17923	-	1	36.2491	164	164	0.085753	-	1	26.4505	279	278	reps	0.193882	0.144444	0.109565	0.0616765
Chr1	156534733	156535162	IQGAP3/ENSG00000183856.11/clean	0	-	10	0.00165997	0.99834	0.00165997	0.148308	-	1	25.5976	130	130	0.0548154	NonUniformIntronCover	1	11.0769	181	181	reps	0.123511	0.182797	0.0919403	0.0281724
Chr16	27476544	27478468	GTF3C1/ENSG00000077235.18/clean	0	-	10	0.00166289	0.998337	0.00166289	0.03652	-	1	12.0157	317	317	0.00814367	NonUniformIntronCover	0.986416	4.2859	521	521	reps	0.0248967	0.0527849	0.00612414	0.00871452
Chr19	1428995	1429966	DAZAP1/ENSG00000071626.17/clean	0	+	10	0.00166687	0.998333	0.00166687	0.0301645	-	1	48.8623	1571	1551	0.0156381	-	1	31.9636	2012	1996	reps	0.02576	0.0381792	0.0144417	0.0168738
Chr19	35737743	35737858	KMT2B/ENSG00000272333.7/anti-near	0	+	10	0.00167046	0.00167046	0.99833	0.000969078	-	0.314286	0.0465116	324	324	0.0276498	-	1	6	211	211	reps	0.00138337	0.000538793	0.0396825	0.0140127
Chr12	71611097	71611785	ZFC3H1/ENSG00000133858.17/known-exon	0	-	10	0.00167959	0.99832	0.00167959	0.399866	-	1	65.9632	97	97	0.23612	NonUniformIntronCover	1	56.2574	182	178	reps	0.420191	0.366209	0.276108	0.20335
Chr12	49792051	49792445	NCKAP5L/ENSG00000167566.17/known-exon	0	-	10	0.00168139	0.998319	0.00168139	0.318908	-	1	56.6558	121	110	0.173331	-	1	36.9026	176	159	reps	0.265558	0.400539	0.100284	0.25525
Chr11	66705468	66705683	SPTBN2/ENSG00000173898.13/clean	0	-	10	0.00168155	0.998318	0.00168155	0.0834356	NonUniformIntronCover	1	5.73494	63	63	0.00331638	-	0.502439	0.506024	151	150	reps	0.121834	0.0337602	0	0.00975564
Chr19	18589683	18590853	REX1BD/ENSG00000006015.17/anti-over	0	+	10	0.00168615	0.998314	0.00168615	0.0678477	NonUniformIntronCover	1	17.6142	206	193	0.0256876	-	1	15.3707	522	521	reps	0.065492	0.0631498	0.0204896	0.0344448
Chr2	112660572	112661141	SLC20A1/ENSG00000144136.11/clean	0	+	10	0.00168756	0.00168756	0.998312	0.00832486	NonUniformIntronCover	1	12.9111	1537	1537	0.0247001	-	1	14.6889	579	578	reps	0.00817532	0.00803889	0.0275338	0.0225975
Chr17	45265263	45266536	MAP3K14/ENSG00000006062.17/anti-over	0	-	297	0.00169026	0.00169026	0.99831	0.0387619	-	1	5.44388	135	130	0.196007	NonUniformIntronCover	1	7.31378	30	30	reps	0.0606634	0.0151071	0.136279	0.257857
Chr11	66688079	66688168	SPTBN2/ENSG00000173898.13/clean	0	-	10	0.00169226	0.998308	0.00169226	0.0470588	-	1	8	162	162	0.00611621	NonUniformIntronCover	1	2	325	319	reps	0.0630631	0.0169492	0.00990099	0
Chr15	75360688	75361045	MAN2C1/ENSG00000140400.17/anti-near	0	-	10	0.00169248	0.998308	0.00169248	0.642617	MinorIsoform	1	145.647	37	37	0.441664	-	1	103.626	105	105	reps	0.604167	0.710341	0.459051	0.43269
Chr2	27312772	27312993	MPV17/ENSG00000115204.15/clean	0	-	10	0.00169709	0.00169709	0.998303	0.0258624	MinorIsoform	1	7.96471	300	200	0.0787145	-	1	29.3059	343	259	reps	0.0192086	0.0306167	0.0686303	0.0870844
Chr15	75339104	75339263	COMMD4/ENSG00000140365.16/clean	0	+	10	0.0016976	0.0016976	0.998302	0.0465011	-	1	38.8689	797	765	0.0792478	-	1	119.377	1387	1358	reps	0.0451227	0.050482	0.0818822	0.0735478
Chr14	20460298	20460654	PIP4P1/ENSG00000165782.10/anti-near	0	-	10	0.00170609	0.00170609	0.998294	0.0755547	-	1	43.8071	531	531	0.13907	-	1	47.8143	296	296	reps	0.0584849	0.0909937	0.123847	0.157276
Chr19	5150450	5151334	KDM4B/ENSG00000127663.15/clean	0	+	10	0.00170845	0.998292	0.00170845	0.126835	-	1	20.0457	138	133	0.0317117	NonUniformIntronCover	1	4.81429	147	147	reps	0.138329	0.123193	0.0252172	0.0373556
Chr15	89301442	89303863	FANCI/ENSG00000140525.18/anti-near	0	+	10	0.00171772	0.998282	0.00171772	0.0466088	NonUniformIntronCover	1	29.6746	607	594	0.0183531	-	1	12.9378	692	683	reps	0.030519	0.0613851	0.0117578	0.0232581
Chr7	100577005	100577085	LRCH4/ENSG00000077454.16/clean	0	-	10	0.00175298	0.00175298	0.998247	0.165885	-	1	39.1786	197	175	0.30013	-	1	57.8929	135	122	reps	0.163575	0.173139	0.277778	0.340118
Chr16	715393	715583	METRN/ENSG00000103260.9/clean	0	+	10	0.0017578	0.998242	0.0017578	0.199752	NonUniformIntronCover	1	98.3472	394	339	0.115021	-	1	37.0417	285	268	reps	0.190055	0.217463	0.126059	0.092437
Chr3	49722147	49722230	GMPPB/ENSG00000173540.13/anti-near	0	-	10	0.00176764	0.998232	0.00176764	0.199562	-	1	44.129	177	144	0.0938106	-	1	20.2903	196	186	reps	0.203172	0.189095	0.122807	0.0591211
Chr1	46410854	46411611	FAAH/ENSG00000117480.16/clean	0	+	10	0.00177707	0.998223	0.00177707	0.321318	MinorIsoform	1	59.1806	125	79	0.175995	-	1	37.1639	174	161	reps	0.292114	0.366011	0.212617	0.147454
Chr1	163339477	163340363	NUF2/ENSG00000143228.13/clean	0	+	10	0.00177764	0.998222	0.00177764	0.0893912	-	1	44.9602	424	421	0.039149	-	1	15.8494	388	388	reps	0.0837783	0.0958829	0.0298622	0.0490968
Chr12	6872997	6873245	SPSB2/ENSG00000111671.9/anti-near	0	-	41	0.00177822	0.998222	0.00177822	0.855098	-	1	29.506	5	5	0.357791	NonUniformIntronCover	1	16.1566	29	29	reps	0.848448	0.868775	0.453736	0.185609
Chr3	158649157	158652095	GFM1/ENSG00000168827.15/anti-over	0	+	77	0.0017885	0.998212	0.0017885	0.054826	-	1	17.5179	298	279	0.0165182	NonUniformIntronCover	0.976931	6.39913	377	356	reps	0.0423789	0.0619929	0.0143177	0.0154267
Chr8	144106241	144106342	MAF1/ENSG00000179632.10/anti-over	0	+	10	0.00179259	0.998207	0.00179259	0.0817368	-	1	47.6216	524	524	0.0430487	-	1	33.9189	749	746	reps	0.0592955	0.108709	0.0473466	0.0379805
Chr16	56502456	56502672	BBS2/ENSG00000125124.12/clean	0	-	10	0.00180282	0.00180282	0.998197	0.120565	-	1	17.2738	126	124	0.263778	NonUniformIntronCover	1	44.7857	125	115	reps	0.141856	0.0819672	0.287477	0.235669
Chr3	49705182	49705533	RNF123/ENSG00000164068.16/clean	0	+	14	0.00180848	0.998192	0.00180848	0.179804	-	1	25.4296	104	104	0.0619707	NonUniformIntronCover	1	10.5704	150	150	reps	0.152808	0.198728	0.0436972	0.080658
Chr9	111370627	111370721	ECPAS/ENSG00000136813.14/clean	0	-	10	0.00181588	0.00181588	0.998184	0.00480769	NonUniformIntronCover	1	3	621	621	0.0254147	-	1	15.4118	591	591	reps	0.00315457	0.00651466	0.009375	0.0433354
Chr2	241107499	241108166	PASK/ENSG00000115687.14/clean	0	-	10	0.00181952	0.99818	0.00181952	0.0863701	-	1	14.4639	153	152	0.0164627	NonUniformIntronCover	0.96347	3.07985	184	184	reps	0.0652731	0.110234	0.00659623	0.0164335
Chr17	44351795	44352014	GRN/ENSG00000030582.18/anti-near	0	+	10	0.00182309	0.00182309	0.998177	0.00406363	-	1	7.56471	1854	1853	0.0137747	-	1	17.6824	1266	1266	reps	0.00400162	0.00406859	0.0156923	0.0116893
Chr8	144399373	144399451	CPSF1/ENSG00000071894.17/clean	0	-	10	0.00182735	0.998173	0.00182735	0.0321502	-	1	12.3571	372	372	0.00461894	-	1	2	431	431	reps	0.0174672	0.0537931	0.00813008	0.000942803
Chr17	29575142	29575287	GIT1/ENSG00000108262.15/anti-over	0	-	10	0.00183212	0.998168	0.00183212	0.0325362	-	1	10.2909	306	306	0.00188006	NonUniformIntronCover	0.659259	0.890909	346	346	reps	0.00585957	0.0676692	0.00302311	0.00132248
Chr16	89868216	89869566	SPIRE2/ENSG00000204991.11/clean	0	+	10	0.00183574	0.00183574	0.998164	0.0130305	NonUniformIntronCover	0.748507	2.75933	205	205	0.0850246	-	0.954478	9.19963	95	95	reps	0.00935749	0.0142639	0.0541701	0.113731
Chr19	619765	619957	POLRMT/ENSG00000099821.14/anti-near	0	-	10	0.00183584	0.998164	0.00183584	0.059843	-	1	31.6351	436	436	0.0212322	NonUniformIntronCover	1	8.24324	355	355	reps	0.0536484	0.0689373	0.0284755	0.0122699
Chr17	7220046	7220121	ACADVL/ENSG00000072778.20/known-exon+anti-near	0	+	10	0.00184127	0.00184127	0.998159	0.260287	-	1	264.963	753	753	0.350927	-	1	146.519	271	271	reps	0.278556	0.24338	0.369739	0.294945
Chr19	49832021	49832099	MED25/ENSG00000104973.18/known-exon	0	+	10	0.00184206	0.00184206	0.998158	0.00477242	NonUniformIntronCover	1	2.39286	499	493	0.0260708	-	1	14	523	522	reps	0.00777874	0.000277393	0.0212766	0.0298013
Chr6	30606035	30606137	PPP1R10/ENSG00000204569.10/clean	0	-	10	0.00185122	0.998149	0.00185122	0.0829805	-	1	25.7895	285	285	0.0308127	-	1	11.7632	370	370	reps	0.0726826	0.0927228	0.0397878	0.0220588
Chr9	136889736	136890348	TRAF2/ENSG00000127191.18/clean	0	+	10	0.0018531	0.0018531	0.998147	0.262195	NonUniformIntronCover	1	10.3058	29	25	0.64629	-	1	62.124	31	29	reps	0.214407	0.298347	0.561815	0.709462
Chr17	47980798	47981162	CDK5RAP3/ENSG00000108465.15/anti-over	0	+	10	0.00185556	0.998144	0.00185556	0.0596106	-	1	49.5704	776	776	0.0302626	NonUniformIntronCover	1	25.2465	806	803	reps	0.0591402	0.060629	0.0292603	0.0319596
Chr17	63819994	63820078	FTSJ3/ENSG00000108592.17/anti-near	0	-	10	0.00185756	0.998142	0.00185756	0.0266223	-	1	10.6667	389	389	0.00595576	NonUniformIntronCover	1	4.2	701	701	reps	0.0213358	0.0324324	0.00459098	0.00884956
Chr15	74839713	74840233	ULK3/ENSG00000140474.14/clean	0	-	10	0.00185873	0.998141	0.00185873	0.0728422	-	1	17.2843	220	214	0.0217391	NonUniformIntronCover	1	8	355	353	reps	0.0279929	0.138072	0.0126939	0.0251085
Chr19	2250760	2250848	AMH/ENSG00000104899.8/anti-near	0	+	10	0.00185999	0.00185999	0.99814	0.126528	-	1	67.9375	469	451	0.232413	-	1	36.0312	119	116	reps	0.122604	0.133758	0.252654	0.192308
Chr12	6550790	6550940	IFFO1/ENSG00000010295.19/clean	0	-	10	0.00186029	0.99814	0.00186029	0.0527475	-	1	9.41071	169	152	0.00444444	NonUniformIntronCover	1	1	224	221	reps	0.0224007	0.108584	0.00840336	0.00195037
Chr11	63997244	63997348	OTUB1/ENSG00000167770.11/anti-near	0	+	10	0.00187302	0.998127	0.00187302	0.028188	-	1	61.5789	2123	2093	0.0155934	-	1	34.3421	2168	2157	reps	0.0282519	0.02783	0.0174106	0.0132516
Chr1	52355449	52355607	CC2D1B/ENSG00000154222.14/clean	0	-	10	0.00187353	0.00187353	0.998126	0.0205479	NonUniformIntronCover	1	6	286	286	0.0791392	-	1	15.3833	178	178	reps	0.0232692	0.0169492	0.048414	0.115789
Chr2	218740584	218745108	TTLL4/ENSG00000135912.11/clean	0	+	10	0.00188296	0.998117	0.00188296	0.136363	NonUniformIntronCover	1	14.0526	89	76	0.0411884	-	0.955915	8.41971	196	192	reps	0.126713	0.138787	0.0294895	0.0477879
Chr2	73228574	73228794	PRADC1/ENSG00000135617.4/anti-near	0	-	10	0.00188745	0.998113	0.00188745	0.156564	-	1	35.0833	186	186	0.0649595	-	1	14.7976	213	213	reps	0.105398	0.240525	0.0784296	0.0461614
Chr22	40406662	40407016	SGSM3/ENSG00000100359.21/anti-near	0	+	10	0.00189355	0.00189355	0.998106	0.0429811	NonUniformIntronCover	1	20.2101	450	450	0.0914558	-	1	45.3986	451	451	reps	0.038992	0.0514619	0.060497	0.125178
Chr15	43775610	43775721	ELL3/ENSG00000128886.12/anti-near	0	-	10	0.0018949	0.998105	0.0018949	0.2121	-	1	14.5366	50	50	0.0338983	-	1	2	57	57	reps	0.077961	0.330612	0.03125	0.037037
Chr1	52866567	52867538	ZYG11A/ENSG00000203995.10/clean	0	+	10	0.00190154	0.998098	0.00190154	0.079325	NonUniformIntronCover	1	6.03117	70	70	0.00290517	-	0.320499	0.0519481	109	109	reps	0.0596478	0.0848994	0.00707184	0
Chr1	45332086	45332165	MUTYH/ENSG00000132781.18/clean	0	-	10	0.00190287	0.998097	0.00190287	0.186516	-	1	13.069	57	56	0.047619	-	1	6	120	115	reps	0.184911	0.20029	0.0309227	0.0656535
Chr11	67250798	67252693	KDM2A/ENSG00000173120.15/anti-over	0	+	368	0.00190851	0.00190851	0.998091	0.0555886	-	1	26.0164	421	420	0.114501	-	1	40.2144	301	301	reps	0.0532025	0.0554839	0.110725	0.119615
Chr2	162359157	162359493	GCA/ENSG00000115271.11/clean	0	+	10	0.00192359	0.00192359	0.998076	0.0581684	-	1	10.1288	164	160	0.165459	NonUniformIntronCover	1	24.3864	123	123	reps	0.0631093	0.0452719	0.0686825	0.219871
Chr22	49924455	49925416	CRELD2/ENSG00000184164.14/clean	0	+	164	0.00192382	0.998076	0.00192382	0.0598934	-	1	41.9843	619	619	0.0258599	-	1	14.2288	534	534	reps	0.0408132	0.0905523	0.0253238	0.0128367
Chr22	30415865	30415947	AC004832.3/ENSG00000249590.7/anti-over	0	+	10	0.00192791	0.00192791	0.998072	0.00346021	-	0.0972222	0	28	27	0.253968	-	1	16	45	45	reps	0.010687	0	0.130435	0.325
Chr16	88723328	88723870	PIEZO1/ENSG00000103335.22/clean	0	-	10	0.00194157	0.998058	0.00194157	0.0946579	-	1	50.5	462	460	0.0418716	-	1	15.514	354	353	reps	0.0988984	0.0871262	0.0562626	0.0212208
Chr9	136859132	136859208	MAMDC4/ENSG00000177943.14/anti-near	0	+	10	0.00194505	0.00194505	0.998055	0.407533	-	1	34.3929	42	42	0.752091	MinorIsoform	1	54.6071	13	13	reps	0.361564	0.495798	0.70996	0.821429
Chr15	99218713	99218897	TTC23/ENSG00000103852.13/clean	0	-	10	0.00194667	0.998053	0.00194667	0.150125	NonUniformIntronCover	1	11.1286	63	63	0.0208269	-	1	1.91429	90	90	reps	0.137738	0.142857	0.00770654	0.0221402
Chr12	47740823	47740914	RAPGEF3/ENSG00000079337.16/known-exon+anti-near+anti-over	0	-	10	0.00195313	0.998047	0.00195313	0.533333	-	1	8	7	7	0.0256616	MinorIsoform	0.395062	0.484848	10	10	reps	0.416667	1	0.0420499	0
Chr6	33680133	33680328	ITPR3/ENSG00000096433.11/clean	0	+	10	0.00195569	0.998044	0.00195569	0.0928166	-	1	15.04	147	147	0.0189746	-	1	3.13333	162	162	reps	0.0744681	0.113824	0.0313879	0.00685596
Chr11	119012254	119013231	CCDC84/ENSG00000186166.9/anti-near	0	+	10	0.00195637	0.998044	0.00195637	0.186034	-	1	43.1964	169	166	0.0802642	NonUniformIntronCover	1	14.2248	163	151	reps	0.172648	0.196836	0.0664112	0.0801158
Chr2	11215412	11215509	ROCK2/ENSG00000134318.14/clean	0	-	10	0.00195888	0.998041	0.00195888	0.0757651	-	1	8.77143	107	106	0.0107527	NonUniformIntronCover	1	2	184	184	reps	0.0227273	0.10828	0	0.0196078
Chr11	62787527	62789022	TMEM179B/ENSG00000185475.11/anti-over	0	+	408	0.00196119	0.00196119	0.998039	0.0229793	NonUniformIntronCover	1	33.892	1441	1372	0.0441084	-	1	42.6368	924	878	reps	0.0236305	0.0215855	0.0271239	0.0764144
Chr10	92009208	92011072	BTAF1/ENSG00000095564.14/clean	0	+	10	0.00196472	0.998035	0.00196472	0.028705	-	1	8.68868	294	275	0.00328004	-	0.800971	1.24394	377	377	reps	0.00587147	0.0352454	0.00303193	0.00275526
Chr17	12994884	12994962	ELAC2/ENSG00000006744.19/anti-near	0	-	10	0.00196809	0.998032	0.00196809	0.076502	-	1	39.9286	468	468	0.0365995	NonUniformIntronCover	1	21.4643	558	558	reps	0.0837614	0.067489	0.0436253	0.0283444
Chr9	136384814	136387484	SNAPC4/ENSG00000165684.4/clean	0	-	100	0.00197131	0.998029	0.00197131	0.212318	MinorIsoform	1	64.6916	240	140	0.124138	-	1	50.7403	358	281	reps	0.202982	0.225055	0.11818	0.131136
Chr6	30921305	30921588	VARS2/ENSG00000137411.18/clean	0	+	10	0.00197479	0.00197479	0.998025	0.0525107	-	1	8.03604	145	143	0.157459	NonUniformIntronCover	1	24.8559	133	132	reps	0.0690094	0.0403458	0.192641	0.113636
Chr1	46192436	46192517	POMGNT1/ENSG00000085998.14/clean	0	-	10	0.00198366	0.998016	0.00198366	0.10119	-	1	17	151	151	0.0371195	-	1	14.3793	373	372	reps	0.0823349	0.130543	0.0540541	0.019802
Chr9	136668362	136668556	EGFL7/ENSG00000172889.16/anti-near	0	+	10	0.00198799	0.00198799	0.998012	0.00383623	-	1	2.22973	529	529	0.0236792	-	1	11.1081	401	400	reps	0.00524934	0.00124844	0.023569	0.0232558
Chr16	2036881	2036954	SLC9A3R2/ENSG00000065054.14/anti-near	0	+	10	0.00198855	0.998011	0.00198855	0.0332326	-	1	11	311	311	0.00607287	-	1	3	490	490	reps	0.040724	0.0181818	0.00460829	0.00722022
ChrX	53551480	53552310	HUWE1/ENSG00000086758.16/clean	0	-	10	0.00198975	0.99801	0.00198975	0.0514478	NonUniformIntronCover	1	25.3293	447	425	0.0197065	-	1	14.5945	722	713	reps	0.0555399	0.0438977	0.0202564	0.0218046
Chr17	41808004	41809705	P3H4/ENSG00000141696.13/clean	0	-	10	0.00200129	0.997999	0.00200129	0.197529	-	1	29.7843	108	103	0.0995203	-	1	42.1078	381	362	reps	0.160548	0.282813	0.0951519	0.0956003
Chr8	143835875	143835966	NRBP2/ENSG00000185189.18/anti-near	0	-	10	0.00201039	0.99799	0.00201039	0.34295	-	1	51.1515	91	91	0.178293	-	1	28.4242	125	125	reps	0.346853	0.337852	0.187824	0.166667
Chr7	99392876	99394028	ARPC1B/ENSG00000130429.15/anti-over	0	+	10	0.00201585	0.997984	0.00201585	0.0261446	-	1	14.9803	558	557	0.00541767	-	0.849387	3.14847	578	572	reps	0.0126636	0.0499601	0.00799733	0.00106789
Chr10	92008275	92008828	BTAF1/ENSG00000095564.14/clean	0	+	10	0.00201682	0.997983	0.00201682	0.025534	-	1	6.81279	260	258	0.00125754	NonUniformIntronCover	0.394107	0.493151	310	309	reps	0.0037794	0.0361126	0.0034391	0.00194722
Chr11	10799756	10800089	EIF4G2/ENSG00000110321.18/anti-over	0	-	10	0.00201874	0.997981	0.00201874	0.0569824	-	1	351.435	5816	5643	0.0448114	-	1	239.26	5100	5058	reps	0.0525678	0.0598595	0.0407584	0.0474583
Chr21	44312294	44312977	PFKL/ENSG00000141959.17/clean	0	+	10	0.00202513	0.00202513	0.997975	0.000566763	NonUniformIntronCover	0.543834	0.98524	951	951	0.0111334	-	1	8.59041	755	753	reps	0.00082456	0.000544527	0.0166672	0.00415962
Chr12	56348623	56348751	STAT2/ENSG00000170581.14/clean	0	-	10	0.00202866	0.00202866	0.997971	0.0798722	-	1	17.1875	198	190	0.178202	-	1	35.5625	164	152	reps	0.07393	0.0913012	0.129005	0.211175
Chr1	8361490	8361762	RERE/ENSG00000142599.19/clean	0	-	10	0.00202944	0.00202944	0.997971	0.0201095	-	1	4.33019	207	207	0.0787105	NonUniformIntronCover	1	16.7453	196	196	reps	0.0299844	0.0168067	0.0648477	0.092607
Chr2	74370544	74370620	DCTN1/ENSG00000204843.12/clean	0	-	10	0.00203544	0.00203544	0.997965	0.00118624	NonUniformIntronCover	1	1	842	842	0.0135116	-	1	10.4643	764	764	reps	0.00215517	0	0.0149207	0.0125
Chr11	66263747	66263850	KLC2/ENSG00000174996.11/anti-near	0	+	10	0.00204044	0.00204044	0.99796	0.00551174	NonUniformIntronCover	1	4.46154	805	805	0.0244652	-	1	11.4359	456	456	reps	0.00141593	0.00898876	0.0214286	0.0290014
Chr16	2462239	2462414	TEDC2/ENSG00000162062.15/clean	0	+	10	0.00204096	0.00204096	0.997959	0.0570006	-	1	26.6567	441	436	0.114013	-	1	46.9701	365	361	reps	0.0567694	0.0571368	0.1078	0.123228
Chr2	74474802	74474915	CCDC142/ENSG00000135637.14/anti-near	0	-	10	0.00204168	0.997958	0.00204168	0.566991	MinorIsoform	1	77.2558	43	43	0.337526	-	1	49.9302	75	75	reps	0.591537	0.537252	0.362018	0.294841
Chr1	25565207	25566847	LDLRAP1/ENSG00000157978.12/clean	0	+	10	0.00204328	0.997957	0.00204328	0.18105	-	1	37.5828	170	156	0.08317	-	1	20.5015	226	212	reps	0.128563	0.305489	0.0803949	0.0904176
Chr8	144754321	144754695	ZNF251/ENSG00000198169.9/clean	0	-	10	0.00204904	0.00204904	0.997951	0.252619	-	1	29.0685	86	81	0.47344	NonUniformIntronCover	1	62.9384	69	69	reps	0.233249	0.26836	0.392667	0.557625
Chr2	219235585	219235707	ANKZF1/ENSG00000163516.14/anti-near	0	+	10	0.00205329	0.00205329	0.997947	0.169416	-	1	33.0435	155	155	0.320412	-	1	51.3913	90	90	reps	0.170694	0.171171	0.328912	0.31153
Chr11	72008845	72008966	NUMA1/ENSG00000137497.18/anti-near	0	-	10	0.00206592	0.997934	0.00206592	0.0253954	-	1	28.6889	1095	1088	0.00811007	NonUniformIntronCover	1	6.22222	761	755	reps	0.0233612	0.0256054	0.00278552	0.0126313
Chr17	2041181	2041480	DPH1/ENSG00000108963.18/known-exon+anti-near	0	+	10	0.00206984	0.00206984	0.99793	0.0410928	-	1	15.4274	360	360	0.0945433	-	1	32.7863	308	306	reps	0.0296328	0.0525402	0.10019	0.0836053
Chr10	100218825	100219007	CHUK/ENSG00000213341.11/clean	0	-	10	0.00207445	0.997926	0.00207445	0.0395962	-	1	7.95714	193	180	0.00346021	NonUniformIntronCover	0.953488	1	288	287	reps	0.0298507	0.0470113	0.000782827	0.00675676
Chr17	45242146	45242340	FMNL1/ENSG00000184922.14/anti-near	0	+	10	0.00208863	0.00208863	0.997911	0.0243902	NonUniformIntronCover	0.75	1	40	40	0.287252	-	1	6.85135	17	17	reps	0.0416667	0	0.210245	0.363636
Chr20	58989021	58989487	NELFCD/ENSG00000101158.15/clean	0	+	10	0.00209356	0.00209356	0.997906	0.0467117	-	1	69.9728	1428	1426	0.0746444	-	1	77.8424	963	963	reps	0.0505153	0.0414017	0.0840695	0.0675261
Chr10	90920348	90921000	ANKRD1/ENSG00000148677.6/clean	0	-	10	0.00210013	0.00210013	0.9979	0.0103916	NonUniformIntronCover	1	12.3488	1173	1170	0.028847	-	1	19.3372	651	649	reps	0.00552427	0.0105336	0.0304486	0.0226591
Chr10	24591683	24591886	ARHGAP21/ENSG00000107863.18/clean	0	-	10	0.00210781	0.00210781	0.997892	0.0209205	-	1	5	234	233	0.0791193	-	1	17.7848	204	204	reps	0.0335812	0.0100627	0.10664	0.0526264
Chr7	151143596	151143736	AGAP3/ENSG00000133612.19/anti-near	0	+	10	0.00211334	0.00211334	0.997887	0.00967742	-	1	6	614	614	0.0352505	NonUniformIntronCover	1	13.5192	370	370	reps	0.0147783	0.00200646	0.0340978	0.0368098
Chr9	137040737	137040813	NPDC1/ENSG00000107281.10/anti-near	0	-	10	0.00211379	0.997886	0.00211379	0.133687	-	1	82.7143	536	473	0.084005	-	1	69.6071	759	744	reps	0.12111	0.157561	0.108941	0.0602012
Chr19	49148763	49148992	PPFIA3/ENSG00000177380.14/anti-near	0	+	10	0.00211525	0.00211525	0.997885	0.00661274	-	0.552511	0.629213	83	77	0.122593	-	1	11.8764	85	81	reps	0.011619	0	0.156565	0.0811942
Chr12	132680046	132680177	POLE/ENSG00000177084.18/clean	0	-	10	0.00211729	0.997883	0.00211729	0.119183	-	1	35.8571	265	257	0.0552846	-	1	19.4286	332	327	reps	0.113946	0.12408	0.0440271	0.0764331
Chr6	44152698	44153675	TMEM63B/ENSG00000137216.19/clean	0	+	10	0.00212854	0.00212854	0.997871	0.0606323	-	1	21.7519	337	332	0.133859	-	1	33.2274	215	215	reps	0.062918	0.0603252	0.171078	0.0700449
Chr19	10110020	10110122	PPAN-P2RY11/ENSG00000243207.6/anti-near	0	+	10	0.00213078	0.00213078	0.997869	0.0262871	-	1	14.6053	541	541	0.0644542	-	1	34.4474	500	500	reps	0.0230813	0.0295552	0.0735142	0.0497221
Chr2	58086426	58088340	VRK2/ENSG00000028116.17/clean	0	+	10	0.00213252	0.997867	0.00213252	0.0712232	NonUniformIntronCover	1	8.12861	80	80	0.00374024	-	0.608193	0.89895	160	160	reps	0.0641046	0.0650919	0.00399334	0.00557293
Chr16	46696085	46697457	ORC6/ENSG00000091651.9/anti-near	0	+	10	0.00214718	0.00214718	0.997853	0.0349325	-	1	28.7766	795	791	0.0694002	-	1	44.2234	589	589	reps	0.0350826	0.0331918	0.0672926	0.0715166
Chr2	27366936	27367073	EIF2B4/ENSG00000115211.16/anti-over	0	-	10	0.00214765	0.00214765	0.997852	0.0756417	-	1	42.4706	519	495	0.13278	-	1	56.8039	371	362	reps	0.090201	0.0585232	0.124157	0.147971
Chr7	93258276	93258356	VPS50/ENSG00000004766.17/clean	0	+	10	0.00215	0.99785	0.00215	0.219672	-	1	19.1429	68	68	0.0227273	-	1	1	43	43	reps	0.217105	0.219032	0	0.0454545
Chr22	50580082	50580189	CHKB/ENSG00000100288.20/clean	0	-	10	0.00215568	0.997844	0.00215568	0.141273	-	1	22.5385	123	123	0.0612956	-	1	20.3077	284	284	reps	0.159387	0.118236	0.0677966	0.055878
Chr11	6393387	6393616	SMPD1/ENSG00000166311.10/anti-near	0	+	10	0.00215588	0.997844	0.00215588	0.147639	-	1	17.4944	84	84	0.0284486	-	1	2.89888	96	95	reps	0.132861	0.17549	0.0363971	0.0087959
Chr6	132789837	132790176	SLC18B1/ENSG00000146409.12/clean	0	-	10	0.00215815	0.997842	0.00215815	0.0644863	-	1	9.44361	126	126	0.00752766	NonUniformIntronCover	0.775076	1.72932	228	228	reps	0.0388815	0.125767	0.00961538	0.004936
Chr1	193023946	193028084	UCHL5/ENSG00000116750.13/clean	0	-	101	0.00216533	0.997835	0.00216533	0.0320175	NonUniformIntronCover	1	15.6452	470	369	0.0104061	-	1	9.0644	848	733	reps	0.0266874	0.0353671	0.00751732	0.0127356
Chr1	44218469	44218587	DMAP1/ENSG00000178028.14/anti-near	0	+	10	0.00216537	0.997835	0.00216537	0.052226	NonUniformIntronCover	1	25.5682	463	463	0.0169903	-	1	7	405	401	reps	0.037759	0.0688581	0.0218517	0.0131244
Chr11	45905041	45905150	MAPK8IP1/ENSG00000121653.11/anti-near	0	+	10	0.00216622	0.997834	0.00216622	0.0665394	NonUniformIntronCover	1	11.0488	155	153	0.00407488	-	0.646465	0.853659	152	152	reps	0.045186	0.0821674	0.00737582	0
Chr11	61366216	61367922	TMEM138/ENSG00000149483.12/known-exon	0	+	133	0.0021681	0.0021681	0.997832	0.057249	-	1	22.1648	365	349	0.118005	-	1	46.4263	342	340	reps	0.0595146	0.0563599	0.105296	0.135593
Chr1	62448666	62450245	USP1/ENSG00000162607.13/anti-near	0	+	10	0.00216909	0.997831	0.00216909	0.0561798	-	1	40	671	671	0.0280952	NonUniformIntronCover	1	26.4213	913	913	reps	0.0585485	0.0542094	0.0311611	0.0263417
Chr14	52757782	52757873	STYX/ENSG00000198252.12/clean	0	+	10	0.00216922	0.997831	0.00216922	0.0976562	NonUniformIntronCover	1	3.78788	35	32	0.00694444	-	1	1	143	140	reps	0.133333	0.0716113	0.02	0
Chr16	1342063	1342180	BAIAP3/ENSG00000007516.14/clean	0	+	10	0.00218033	0.99782	0.00218033	0.582524	LowCover	1	5.5814	4	4	0	-	0	0	14	14	reps	0.772487	0.4	0	0
Chr11	65884656	65884934	FIBP/ENSG00000172500.13/anti-near	0	-	10	0.00218155	0.00218155	0.997818	0.0448994	-	1	41.463	877	877	0.0778637	-	1	67.213	790	790	reps	0.0449314	0.0484581	0.0792185	0.0755556
Chr1	111447144	111447434	WDR77/ENSG00000116455.14/clean	0	-	10	0.00218381	0.997816	0.00218381	0.0723571	-	1	44.9286	576	555	0.0391845	-	1	40.0893	983	976	reps	0.0761287	0.0653023	0.0353599	0.042284
Chr11	62629957	62630196	GANAB/ENSG00000089597.18/clean	0	-	10	0.00219812	0.00219812	0.997802	0.00693232	-	1	21.9892	2813	2807	0.0154183	NonUniformIntronCover	1	29.0645	1832	1826	reps	0.00444267	0.00907554	0.0140638	0.0160111
Chr11	63908304	63908876	MARK2/ENSG00000072518.20/anti-near	0	+	10	0.00220042	0.00220042	0.9978	0.0212027	NonUniformIntronCover	1	11.8274	521	521	0.0606792	-	1	20.4779	290	290	reps	0.0257107	0.0172199	0.0543044	0.0751884
Chr3	52122477	52125112	POC1A/ENSG00000164087.8/clean	0	-	10	0.00220054	0.00220054	0.997799	0.00659709	-	0.849905	1.30162	187	187	0.0535795	NonUniformIntronCover	1	8.60514	145	145	reps	0.00499933	0.00599632	0.0619757	0.0413197
Chr17	35918443	35920186	RDM1/ENSG00000278023.7/clean	0	-	10	0.00221912	0.997781	0.00221912	0.120253	-	0.866128	1.77698	13	13	0.00302028	NonUniformIntronCover	0.302943	0.00863309	98	97	reps	0.0452229	0.348006	0.00616487	0.00158704
Chr3	46923363	46923606	CCDC12/ENSG00000160799.11/clean	0	-	10	0.00221974	0.00221974	0.99778	0.018705	-	1	13	682	680	0.0512868	-	1	20.3263	375	375	reps	0.00728155	0.0346599	0.0459735	0.0642434
Chr9	35740123	35740208	GBA2/ENSG00000070610.14/anti-near	0	-	10	0.00223045	0.99777	0.00223045	0.0332118	-	1	7.93548	230	230	0	-	0	0	231	231	reps	0.0336134	0.0356664	0	0
Chr16	1348301	1348378	BAIAP3/ENSG00000007516.14/anti-near	0	+	10	0.00223376	0.997766	0.00223376	0.365949	-	1	6.92593	12	12	0.0334873	NonUniformIntronCover	1	1.07407	29	29	reps	0.429003	0.25	0.0629067	0
Chr1	156528060	156528508	IQGAP3/ENSG00000183856.11/clean	0	-	10	0.00223425	0.997766	0.00223425	0.310263	-	1	71.5227	159	155	0.175734	-	1	36.6705	172	169	reps	0.286796	0.329302	0.276175	0.0866158
Chr1	943808	943907	SAMD11/ENSG00000187634.12/known-exon+anti-near	0	+	10	0.00223534	0.00223534	0.997765	0.152795	-	1	84.9459	471	464	0.223418	-	1	157.081	546	533	reps	0.149823	0.1604	0.218476	0.230963
Chr17	81189843	81189914	CEP131/ENSG00000141577.14/known-exon	0	-	10	0.00224036	0.99776	0.00224036	0.0795287	-	1	21.6	250	250	0.0255522	NonUniformIntronCover	1	7.08	270	270	reps	0.0713968	0.0978261	0.0300516	0.017423
Chr6	41091694	41092911	NFYA/ENSG00000001167.14/anti-over	0	+	10	0.00224356	0.997756	0.00224356	0.0710205	-	1	10.2443	122	122	0.0155615	NonUniformIntronCover	0.896437	4.33126	274	274	reps	0.071511	0.0582135	0.0154076	0.0162933
Chr16	88715106	88715181	CTU2/ENSG00000174177.13/known-exon+anti-near	0	+	10	0.00224493	0.997755	0.00224493	0.171599	-	1	46.8148	206	203	0.0838405	NonUniformIntronCover	1	20.4074	215	214	reps	0.162508	0.177914	0.129032	0.0272727
Chr3	142375944	142376478	XRN1/ENSG00000114127.10/clean	0	-	10	0.00224683	0.997753	0.00224683	0.239085	-	1	19.1667	59	59	0.0603459	NonUniformIntronCover	1	4.75238	74	74	reps	0.140305	0.283151	0.0519878	0.0690722
Chr11	67441244	67441332	CORO1B/ENSG00000172725.14/clean	0	-	10	0.0022502	0.99775	0.0022502	0.0796183	-	1	38.0625	431	431	0.0393359	-	1	25.4688	611	609	reps	0.0678083	0.101404	0.0467698	0.0323974
Chr8	20212905	20214817	ATP6V1B2/ENSG00000147416.11/clean	0	+	10	0.00225108	0.00225108	0.997749	0.0146437	-	1	20.8504	1403	1387	0.0328099	-	1	27.6811	816	814	reps	0.0126646	0.0173739	0.0320622	0.032206
Chr12	49326158	49326667	TROAP/ENSG00000135451.13/clean	0	+	37	0.00225313	0.997747	0.00225313	0.137127	-	1	47.3579	282	279	0.0662511	-	1	20.3632	287	284	reps	0.116838	0.158397	0.0742545	0.0582573
Chr17	61985090	61987006	MED13/ENSG00000108510.10/clean	0	-	10	0.00225894	0.997741	0.00225894	0.0604512	MinorIsoform	1	4.1178	33	32	0.00135192	-	0.219307	0	160	159	reps	0.0597837	0.0604504	0.00336262	0.00044333
Chr7	2377075	2378688	EIF3B/ENSG00000106263.18/clean	0	+	400	0.00226079	0.997739	0.00226079	0.0150027	NonUniformIntronCover	0.950536	14.8809	977	970	0.00506504	-	0.89695	11.154	2191	2186	reps	0.0162345	0.0123241	0.00593818	0.00381942
Chr5	34923051	34923132	BRIX1/ENSG00000113460.13/clean	0	+	10	0.00226366	0.00226366	0.997736	0.0103494	-	1	14.3793	1374	1374	0.0249809	-	1	29.3103	1144	1144	reps	0.0132631	0.00840336	0.0376106	0.0151745
Chr3	66380489	66380576	LRIG1/ENSG00000144749.13/known-exon+anti-near+anti-over	0	-	10	0.00226397	0.997736	0.00226397	0.135758	-	1	21.6774	138	138	0.0478348	NonUniformIntronCover	1	9.19355	183	183	reps	0.100645	0.178522	0.0864198	0.018018
Chr17	81914167	81914293	SIRT7/ENSG00000187531.14/clean	0	-	10	0.00226573	0.00226573	0.997734	0.0964089	-	1	40.4375	379	379	0.17492	-	1	44.5208	210	210	reps	0.114171	0.0765412	0.158708	0.195152
Chr11	375773	375846	B4GALNT4/ENSG00000182272.12/clean	0	+	10	0.00226835	0.997732	0.00226835	0.450801	-	1	65.6667	80	80	0.275992	-	1	65.1852	171	171	reps	0.400768	0.525424	0.310365	0.244569
Chr3	49129716	49129838	LAMB2/ENSG00000172037.14/clean	0	-	10	0.00226994	0.99773	0.00226994	0.139798	-	1	20.1522	123	123	0.0452142	-	1	7.43478	157	157	reps	0.155447	0.0885781	0.00823365	0.0659898
Chr1	54228477	54228747	SSBP3/ENSG00000157216.15/anti-near	0	-	10	0.00227013	0.99773	0.00227013	0.0327789	-	1	11.0481	326	315	0.00778308	NonUniformIntronCover	1	4.47115	570	569	reps	0.0214545	0.0528088	0.00196515	0.0141674
Chr19	622985	623453	POLRMT/ENSG00000099821.14/clean	0	-	10	0.00228036	0.99772	0.00228036	0.055258	-	1	21.6413	370	353	0.0163531	-	1	5.91848	356	352	reps	0.040749	0.0716771	0.0112247	0.0245287
Chr19	35267734	35267823	LSR/ENSG00000105699.16/clean	0	+	10	0.00228879	0.00228879	0.997711	0.0417618	-	1	15.5152	356	356	0.113231	-	1	16.7273	131	131	reps	0.0526575	0.0314578	0.102751	0.126984
Chr4	186597171	186597681	FAT1/ENSG00000083857.14/clean	0	-	110	0.00229549	0.00229549	0.997705	0.00820722	NonUniformIntronCover	1	2.9625	332	331	0.0419358	-	1	12.7812	276	276	reps	0.00582696	0.0135361	0.0246821	0.0584371
Chr11	61785874	61786062	MYRF/ENSG00000124920.13/anti-over	0	+	10	0.00229799	0.997702	0.00229799	0.211982	-	1	10.2222	38	38	0.035601	NonUniformIntronCover	1	2.80556	76	76	reps	0.163105	0.32349	0.00938146	0.0622618
Chr2	147958383	147958790	ORC4/ENSG00000115947.14/clean	0	-	10	0.00229884	0.997701	0.00229884	0.037466	-	1	9.88679	254	251	0.00232456	NonUniformIntronCover	0.652393	0.880503	280	278	reps	0.0483006	0.029892	0.00461515	0.000783711
ChrX	154361787	154361978	FLNA/ENSG00000196924.18/clean	0	-	10	0.00231729	0.997683	0.00231729	0.0242193	-	1	20.4521	822	821	0.00969534	NonUniformIntronCover	1	20.7945	2124	2119	reps	0.0205063	0.0274968	0.014284	0.00518487
Chr7	74601180	74602364	GTF2IRD1/ENSG00000006704.10/known-exon	0	+	10	0.00232793	0.997672	0.00232793	0.397305	NonUniformIntronCover	1	34.9383	48	48	0.184942	-	1	21.783	96	94	reps	0.430303	0.360176	0.234029	0.140768
Chr19	46722072	46722241	STRN4/ENSG00000090372.15/clean	0	-	10	0.00234496	0.997655	0.00234496	0.0651853	-	1	33.2615	439	439	0.0322751	NonUniformIntronCover	1	32.9846	955	955	reps	0.0751516	0.0494536	0.0331112	0.0322581
Chr18	31091147	31092100	DSC2/ENSG00000134755.17/clean	0	-	57	0.00234841	0.997652	0.00234841	0.103734	NonUniformIntronCover	0.890625	7.63889	64	63	0.0051606	-	0.368304	0.172222	71	71	reps	0.0194702	0.137921	0	0.00731221
Chr5	95731684	95731858	RHOBTB3/ENSG00000164292.13/anti-over	0	+	10	0.00235199	0.997648	0.00235199	0.0332276	-	1	7.93939	230	230	0.00298507	-	0.786585	1	332	331	reps	0.0310596	0.0477499	0.0045045	0.00188506
Chr7	100029952	100030248	ZKSCAN1/ENSG00000106261.17/clean	0	+	10	0.00235909	0.997641	0.00235909	0.0932855	NonUniformIntronCover	1	6.27586	61	60	0.00514217	-	0.475524	0.439655	92	92	reps	0.0357143	0.129168	0	0.0104567
Chr3	172760263	172761609	ECT2/ENSG00000114346.13/clean	0	+	30	0.00236019	0.99764	0.00236019	0.0288525	-	1	12.3295	413	410	0.00156536	NonUniformIntronCover	0.396657	0.242424	250	250	reps	0.0190458	0.0325314	0.00171166	0.00268587
Chr3	184357487	184357619	CLCN2/ENSG00000114859.16/clean	0	-	10	0.0023658	0.997634	0.0023658	0.317269	NonUniformIntronCover	1	7.9	17	14	0.0175272	-	0.606557	0.76	34	29	reps	0.230769	0.423394	0.0294352	0
Chr12	49325884	49326075	TROAP/ENSG00000135451.13/clean	0	+	10	0.0023702	0.99763	0.0023702	0.10723	-	1	38.3151	319	308	0.0435334	-	1	12.6986	279	277	reps	0.066046	0.159788	0.0361784	0.05
Chr16	2251429	2251514	ECI1/ENSG00000167969.13/known-exon	0	-	10	0.00237305	0.997627	0.00237305	0.342022	-	1	656.516	1263	1238	0.285133	-	1	372.935	935	910	reps	0.354836	0.322803	0.292971	0.274885
Chr17	44154664	44154852	HROB/ENSG00000125319.14/clean	0	+	10	0.00238572	0.997614	0.00238572	0.325985	MinorIsoform	1	29.9861	62	46	0.144649	-	1	18.2639	108	83	reps	0.282532	0.357143	0.115067	0.174312
Chr16	67947788	67948060	SLC12A4/ENSG00000124067.17/clean	0	-	10	0.00239656	0.997603	0.00239656	0.0896471	NonUniformIntronCover	1	7.18868	73	73	0.00929133	-	0.885496	1.59434	170	170	reps	0.0980551	0.0800672	0.0190723	0
Chr20	2659585	2659698	IDH3B/ENSG00000101365.21/anti-near	0	-	10	0.00240029	0.00240029	0.9976	0.00988753	-	1	25.5349	2557	2541	0.0209774	-	1	35.4186	1653	1620	reps	0.00971241	0.0103548	0.026808	0.0136325
Chr3	127017037	127017424	PLXNA1/ENSG00000114554.11/clean	0	+	10	0.00241472	0.00241472	0.997585	0.00598802	NonUniformIntronCover	0.928382	1	164	164	0.0582823	-	1	13.8013	223	222	reps	0	0.0125	0.0766527	0.0298487
Chr16	30655214	30655350	PRR14/ENSG00000156858.11/clean	0	+	10	0.00241595	0.997584	0.00241595	0.109766	-	1	46.7308	332	332	0.0529538	-	1	19.9615	348	348	reps	0.0655885	0.153279	0.0587696	0.0452994
Chr3	47406612	47406702	PTPN23/ENSG00000076201.15/clean	0	+	10	0.00241773	0.997582	0.00241773	0.0619543	NonUniformIntronCover	1	9.3125	141	138	0	-	0	0	124	124	reps	0.121622	0.00490998	0	0
Chr9	114289295	114290057	COL27A1/ENSG00000196739.15/clean	0	+	10	0.00243865	0.997561	0.00243865	0.733686	LowCover	0.836436	2.75497	1	1	0.0242817	-	0.348404	0.122517	14	14	reps	0.692151	1	0.0336674	0
Chr17	82920618	82921500	TBCD/ENSG00000141556.21/clean	0	+	10	0.00244068	0.997559	0.00244068	0.070165	-	1	19.4686	258	258	0.0221771	NonUniformIntronCover	0.980505	8.05143	355	355	reps	0.063213	0.0902475	0.0166317	0.0254596
Chr2	240573891	240574112	RNPEPL1/ENSG00000142327.13/clean	0	+	10	0.00244217	0.997558	0.00244217	0.116816	-	1	17.9882	136	132	0.0354847	NonUniformIntronCover	1	6.36471	163	159	reps	0.111138	0.129693	0.0414008	0.0319361
Chr19	49464762	49465737	ALDH16A1/ENSG00000161618.10/clean	0	+	10	0.00244366	0.997556	0.00244366	0.173169	-	1	20.1059	96	94	0.0641382	-	1	13.6382	199	189	reps	0.141823	0.259128	0.0715744	0.04914
Chr15	51458795	51459597	DMXL2/ENSG00000104093.13/anti-over	0	-	144	0.00244521	0.997555	0.00244521	0.531	NonUniformIntronCover	1	22.6439	20	19	0.203235	-	1	12.7538	50	50	reps	0.551909	0.479033	0.179046	0.214188
Chr16	1768107	1768198	MAPK8IP3/ENSG00000138834.13/anti-near	0	+	10	0.00244523	0.00244523	0.997555	0.0234152	NonUniformIntronCover	1	13.6667	560	560	0.0597357	-	1	23.697	373	373	reps	0.0280464	0.0167364	0.0595972	0.0621771
Chr22	30384495	30385903	RNF215/ENSG00000099999.15/clean	0	-	10	0.00244597	0.997554	0.00244597	0.143595	MinorIsoform	1	9.725	58	43	0.0369687	-	0.929185	6.79464	177	175	reps	0.140874	0.151515	0.0283928	0.0411364
Chr7	75424225	75424525	POM121C/ENSG00000272391.6/clean	0	-	50	0.00244603	0.997554	0.00244603	0.0498084	-	1	9.75	186	186	0.0127336	NonUniformIntronCover	1	5.43	421	420	reps	0.0687612	0.0293429	0.0230388	0.00232187
Chr19	35618699	35618886	HAUS5/ENSG00000249115.9/clean	0	+	10	0.00244775	0.997552	0.00244775	0.114516	-	1	37.6338	291	282	0.052926	NonUniformIntronCover	1	17.3239	310	306	reps	0.0755208	0.172261	0.0684318	0.0339223
Chr19	49135923	49136723	PPFIA3/ENSG00000177380.14/clean	0	+	10	0.00245268	0.997547	0.00245268	0.0808164	NonUniformIntronCover	0.939241	5.27532	60	59	0.00367092	-	0.412658	0.281646	112	110	reps	0.0598036	0.0923887	0.00612138	0
Chr12	55938989	55939185	DGKA/ENSG00000065357.20/clean	0	+	10	0.00245391	0.997546	0.00245391	0.245079	-	1	17.8553	55	55	0.0599303	-	1	4.52632	71	71	reps	0.246779	0.24812	0.123616	0.0212766
Chr8	94874602	94876073	INTS8/ENSG00000164941.14/anti-near	0	+	10	0.00245734	0.997543	0.00245734	0.110562	-	1	15.9111	127	127	0.0366073	-	1	9.95556	259	259	reps	0.106204	0.118463	0.0448022	0.0310342
Chr3	50288271	50288408	IFRD2/ENSG00000214706.10/anti-near	0	-	10	0.00245937	0.997541	0.00245937	0.292555	-	1	233.235	557	556	0.218391	-	1	152	543	541	reps	0.275933	0.305913	0.188516	0.258121
Chr12	121752223	121761648	TMEM120B/ENSG00000188735.13/clean	0	+	120	0.00246117	0.00246117	0.997539	0.00295199	-	0.387856	0.219715	130	129	0.0557251	NonUniformIntronCover	0.950242	7.67177	117	110	reps	0.00353051	0.00290566	0.0456392	0.0636024
Chr14	35723264	35725023	RALGAPA1/ENSG00000174373.16/clean	0	-	10	0.00246716	0.997533	0.00246716	0.155162	NonUniformIntronCover	0.994854	8.63195	47	46	0.00841823	-	0.56032	0.965763	66	64	reps	0.158308	0.147995	0.0171396	0.0102451
Chr11	32601822	32602278	EIF3M/ENSG00000149100.13/anti-over	0	+	89	0.00246722	0.00246722	0.997533	0.0104023	-	1	19.7619	1880	1851	0.0217789	-	1	45.7075	2051	2046	reps	0.00802623	0.0116526	0.0193689	0.023533
Chr3	50275459	50275559	SEMA3B/ENSG00000012171.20/clean	0	+	10	0.00246777	0.997532	0.00246777	0.333333	LowCover	1	1.5	2	2	0	-	0	0	28	28	reps	0.108911	1	0	0
Chr11	85635778	85636045	TMEM126B/ENSG00000171204.13/known-exon	0	+	10	0.00248512	0.00248512	0.997515	0.0801056	-	1	65.3981	751	745	0.125205	-	1	92.0291	643	640	reps	0.0879974	0.0736357	0.125677	0.121595
Chr1	147285487	147286297	CHD1L/ENSG00000131778.19/anti-over	0	+	10	0.00250347	0.997497	0.00250347	0.0461955	-	1	16.4187	337	334	0.0143998	NonUniformIntronCover	1	9.62813	655	655	reps	0.0357938	0.0617503	0.00531817	0.025662
Chr17	1776742	1777186	SERPINF1/ENSG00000132386.11/anti-near	0	+	10	0.00250489	0.997495	0.00250489	0.666421	-	1	25.9713	13	13	0.320005	-	1	32.4713	69	69	reps	0.574312	0.903601	0.558376	0.205882
Chr10	93694937	93698135	FRA10AC1/ENSG00000148690.12/clean	0	-	10	0.00251282	0.00251282	0.997487	0.00229349	-	0.826537	1.41144	614	612	0.0159457	NonUniformIntronCover	1	10.5165	649	647	reps	0.00187509	0.00166598	0.012766	0.0167369
Chr6	37479255	37480012	CMTR1/ENSG00000137200.13/anti-near	0	+	10	0.0025147	0.997485	0.0025147	0.0767022	-	1	40.291	485	468	0.033761	-	1	16.5619	474	446	reps	0.0742636	0.0855701	0.0245255	0.0479803
Chr8	144510903	144510990	MFSD3/ENSG00000167700.9/anti-near	0	+	10	0.00252054	0.997479	0.00252054	0.267117	-	1	56.129	154	151	0.157779	-	1	55.4516	296	293	reps	0.291355	0.186643	0.181662	0.129752
Chr2	36849625	36849713	STRN/ENSG00000115808.12/clean	0	-	10	0.00252374	0.997476	0.00252374	0.0362319	-	1	5	133	132	0.000108637	NonUniformIntronCover	0.025641	0	236	235	reps	0.015873	0.0533333	0.000261575	9.28936e-05
Chr1	211365468	211369451	TRAF5/ENSG00000082512.15/clean	0	+	574	0.00252803	0.997472	0.00252803	0.695469	-	1	29.6886	12	11	0.341857	-	1	32.7238	52	50	reps	0.620873	0.761714	0.233347	0.414521
Chr17	47976013	47976711	CDK5RAP3/ENSG00000108465.15/anti-near	0	+	10	0.00252888	0.997471	0.00252888	0.121752	-	1	106.884	762	762	0.0756455	-	1	48.1196	586	586	reps	0.106707	0.145402	0.0677644	0.0870546
Chr16	669606	670122	RHOT2/ENSG00000140983.14/clean	0	+	10	0.00252972	0.99747	0.00252972	0.169234	-	1	162.559	731	727	0.122173	-	1	130.966	875	875	reps	0.168813	0.161214	0.125278	0.111318
Chr17	43829791	43830026	MPP3/ENSG00000161647.18/clean	0	-	10	0.00253081	0.00253081	0.997469	0.120915	NonUniformIntronCover	1	16.5055	120	117	0.287129	-	1	29	72	72	reps	0.195388	0.055079	0.337861	0.24541
Chr20	63882820	63889189	TPD52L2/ENSG00000101150.17/clean	0	+	329	0.00253277	0.997467	0.00253277	0.0914513	-	1	82.7397	822	757	0.0572375	-	1	61.7446	1017	984	reps	0.0902077	0.0923318	0.04705	0.0678997
Chr7	103315871	103315987	DNAJC2/ENSG00000105821.15/anti-over	0	-	10	0.0025343	0.997466	0.0025343	0.0540014	-	1	19.5227	342	342	0.0200748	NonUniformIntronCover	1	11.8409	573	573	reps	0.0531715	0.0571032	0.00574713	0.0404211
Chr12	108536785	108537487	SART3/ENSG00000075856.12/anti-over	0	-	10	0.00254051	0.997459	0.00254051	0.0585957	-	1	15.9964	257	249	0.015207	NonUniformIntronCover	1	4.95683	321	311	reps	0.0574274	0.066507	0.00356245	0.0263616
Chr1	6588844	6588915	ZBTB48/ENSG00000204859.13/anti-near	0	+	10	0.00254503	0.997455	0.00254503	0.102087	-	1	25.24	220	220	0.0305281	-	1	5.92	188	188	reps	0.106324	0.102257	0.0350567	0.0246914
Chr11	6609639	6609723	ILK/ENSG00000166333.14/known-exon+anti-near+anti-over	0	+	10	0.00254663	0.997453	0.00254663	0.0378215	-	1	25	636	636	0.0128351	-	1	8.63333	664	664	reps	0.0308483	0.0477941	0.0109217	0.0144509
Chr19	50401924	50401998	POLD1/ENSG00000062822.15/clean	0	+	10	0.00255341	0.997447	0.00255341	0.0419936	-	1	25.7308	587	564	0.014401	NonUniformIntronCover	1	8.57692	587	582	reps	0.0342628	0.0580314	0.0210718	0.00423729
Chr20	45000520	45001166	STK4/ENSG00000101109.12/clean	0	+	10	0.00256412	0.997436	0.00256412	0.195844	-	1	25.3281	104	102	0.0797336	NonUniformIntronCover	1	15.8555	181	180	reps	0.191773	0.191919	0.0476528	0.105622
Chr12	15900053	15900946	STRAP/ENSG00000023734.11/clean	0	+	10	0.00256905	0.997431	0.00256905	0.0136887	-	1	24.8845	1793	1767	0.00551712	-	1	13.9803	2520	2496	reps	0.0197769	0.0084102	0.00778024	0.00370947
Chr14	52757924	52759681	STYX/ENSG00000198252.12/clean	0	+	10	0.00257667	0.997423	0.00257667	0.10681	-	0.999428	4.06581	31	31	0.003756	-	0.501431	0.55794	130	130	reps	0.0456397	0.113238	0.00745045	0.00360153
Chr22	41526453	41527287	ACO2/ENSG00000100412.16/known-exon+anti-near+anti-over	0	+	10	0.00257977	0.00257977	0.99742	0.253533	-	1	144.348	425	423	0.335897	-	1	284.761	563	560	reps	0.265436	0.233759	0.364756	0.310427
Chr17	61955567	61955679	MED13/ENSG00000108510.10/clean	0	-	10	0.00258117	0.997419	0.00258117	0.0349265	NonUniformIntronCover	1	4.52381	125	114	0	-	0	0	221	213	reps	0.037037	0.0334174	0	0
Chr17	4676162	4676356	PELP1/ENSG00000141456.16/anti-over	0	-	10	0.0026023	0.997398	0.0026023	0.0568589	-	1	43.527	722	644	0.0275844	NonUniformIntronCover	1	20.027	706	674	reps	0.0498286	0.0629385	0.0404643	0.0163067
Chr15	74591434	74591559	ARID3B/ENSG00000179361.17/clean	0	+	10	0.0026035	0.997397	0.0026035	0.079673	-	1	18.8723	209	208	0.018813	NonUniformIntronCover	1	3.29787	160	160	reps	0.0736612	0.0843157	0.0264814	0.0106383
Chr6	31633989	31634235	PRRC2A/ENSG00000204469.13/anti-near	0	+	10	0.00260939	0.00260939	0.997391	0.0374067	-	1	52.0729	1340	1340	0.0615359	-	1	78.2917	1191	1191	reps	0.0402655	0.0332153	0.0749131	0.0480333
Chr9	130613027	130614287	FUBP3/ENSG00000107164.16/clean	0	+	10	0.00261008	0.99739	0.00261008	0.0265782	-	1	16.71	612	593	0.0091091	-	1	9.248	1006	998	reps	0.0165294	0.0357453	0.00453836	0.0130014
Chr19	43932690	43934425	ZNF45/ENSG00000124459.12/anti-near	0	-	10	0.00261053	0.997389	0.00261053	0.0784164	MinorIsoform	0.989565	4.59479	31	31	0.0027403	-	0.274783	0	94	93	reps	0.127675	0.040819	0	0.00546562
Chr11	66714407	66715221	SPTBN2/ENSG00000173898.13/clean	0	-	10	0.00261648	0.997384	0.00261648	0.0357357	NonUniformIntronCover	0.849502	3.8913	105	105	0	-	0	0	249	247	reps	0.0103664	0.0750368	0	0
Chr22	21000787	21001255	THAP7/ENSG00000184436.12/anti-near	0	-	10	0.00261667	0.997383	0.00261667	0.311908	-	1	106.071	234	227	0.211767	-	1	102.897	383	381	reps	0.304845	0.323905	0.183721	0.243612
Chr5	36962274	36970875	NIPBL/ENSG00000164190.19/clean	0	+	10	0.00262063	0.997379	0.00262063	0.0537805	NonUniformIntronCover	0.961006	4.71749	83	83	0.00183405	-	0.273775	0	149	149	reps	0.0469055	0.0505103	0.00409146	0.000918485
Chr2	27434762	27435132	NRBP1/ENSG00000115216.14/clean	0	+	10	0.00262193	0.00262193	0.997378	0.0121591	-	1	18.5	1503	1501	0.0300627	-	1	18.5347	598	595	reps	0.0142801	0.00910221	0.0484662	0.0189866
Chr12	131753363	131754367	SFSWAP/ENSG00000061936.9/anti-near	0	+	10	0.00263042	0.00263042	0.99737	0.010701	NonUniformIntronCover	0.896378	3.82915	354	343	0.0478679	-	1	16.3894	326	321	reps	0.0175745	0.00289173	0.0377524	0.0607151
Chr1	1338183	1338268	DVL1/ENSG00000107404.20/anti-near	0	-	10	0.00263485	0.997365	0.00263485	0.0124581	NonUniformIntronCover	1	11.871	928	927	0.00126103	-	0.973333	1	781	781	reps	0.0143113	0.00982801	0.00208333	0
Chr6	132771129	132772131	SLC18B1/ENSG00000146409.12/clean	0	-	10	0.00264131	0.997359	0.00264131	0.219855	-	1	36.6357	130	104	0.101315	-	1	17.2487	153	147	reps	0.227532	0.219382	0.0647092	0.159799
Chr10	28610821	28611773	WAC/ENSG00000095787.23/clean	0	+	247	0.0026462	0.0026462	0.997354	0.0094816	NonUniformIntronCover	1	6.18375	646	629	0.0306076	-	1	22.0071	692	677	reps	0.00761333	0.0120949	0.0305211	0.0306056
Chr1	85026088	85026171	MCOLN3/ENSG00000055732.13/known-exon+anti-near+anti-over	0	-	10	0.00265816	0.997342	0.00265816	0.733472	MinorIsoform	1	79.8065	15	15	0.337716	-	1	13.2581	26	26	reps	0.725177	0.737171	0.471591	0.236232
Chr16	2062008	2062496	TSC2/ENSG00000103197.18/clean	0	+	10	0.00267163	0.997328	0.00267163	0.100337	-	1	26.9896	221	221	0.0424495	-	1	15.25	338	338	reps	0.109814	0.0773263	0.0475547	0.0277033
Chr17	42210301	42210402	STAT5B/ENSG00000173757.10/clean	0	-	10	0.00267543	0.997325	0.00267543	0.0624534	-	1	11.3243	170	170	0.00800508	-	1	1.7027	210	210	reps	0.0738706	0.0526622	0.00627901	0.00757576
Chr12	49103813	49104447	LMBR1L/ENSG00000139636.15/clean	0	-	10	0.00267898	0.00267898	0.997321	0.0631233	NonUniformIntronCover	1	12.532	186	179	0.167386	-	1	21.712	108	100	reps	0.0600475	0.0654416	0.159477	0.157191
Chr14	45110220	45110548	PRPF39/ENSG00000185246.18/clean	0	+	10	0.00268205	0.997318	0.00268205	0.0918229	-	1	24.2656	240	236	0.0291122	NonUniformIntronCover	0.987421	6.29688	210	210	reps	0.062302	0.112019	0.0491429	0.0149254
Chr14	20992622	20993117	METTL17/ENSG00000165792.17/anti-near	0	+	10	0.00268356	0.00268356	0.997316	0.0391754	-	1	30.5795	747	741	0.0751356	NonUniformIntronCover	1	43.6256	535	532	reps	0.0331116	0.0452181	0.0555644	0.0871493
Chr14	23563856	23564045	AP1G2/ENSG00000213983.12/anti-over	0	-	10	0.00268678	0.997313	0.00268678	0.4927	-	1	96.1507	99	89	0.32132	-	1	76.6986	162	160	reps	0.510126	0.460168	0.401493	0.245868
Chr14	96292098	96294959	ATG2B/ENSG00000066739.12/clean	0	-	253	0.00268997	0.99731	0.00268997	0.225227	NonUniformIntronCover	1	17.7328	59	59	0.0699109	-	0.985429	6.99042	93	93	reps	0.178893	0.270822	0.0496131	0.0837571
Chr12	112228811	112229697	HECTD4/ENSG00000173064.13/clean	0	-	10	0.00269892	0.997301	0.00269892	0.11414	NonUniformIntronCover	1	6.18466	48	44	0.0107116	-	0.892694	1.14773	106	99	reps	0.059138	0.154016	0.012624	0.00699036
Chr12	49792588	49792677	NCKAP5L/ENSG00000167566.17/clean	0	-	10	0.00270039	0.9973	0.00270039	0.0773585	NonUniformIntronCover	1	13.6667	163	151	0.0184332	-	1	4	213	212	reps	0.0551948	0.108108	0.0366972	0
Chr17	80334270	80336160	RNF213/ENSG00000173821.19/clean	0	+	106	0.00272482	0.997275	0.00272482	0.223333	NonUniformIntronCover	0.998318	4.60084	16	16	0.0249819	-	0.709641	1.7423	68	68	reps	0.192557	0.208777	0.0314782	0.0117632
Chr19	18993740	18994365	SUGP2/ENSG00000064607.17/known-exon	0	-	10	0.00273509	0.00273509	0.997265	0.13037	-	1	62.0648	380	380	0.205647	-	1	89.0567	281	281	reps	0.135841	0.127818	0.186983	0.23078
Chr9	94451527	94453957	MFSD14B/ENSG00000148110.16/clean	0	+	10	0.00274666	0.997253	0.00274666	0.0457064	-	1	22.1756	463	458	0.0185117	NonUniformIntronCover	0.962397	16.0506	851	847	reps	0.0278587	0.0618064	0.0201309	0.0154664
Chr22	41524968	41525192	ACO2/ENSG00000100412.16/anti-near	0	+	10	0.00275133	0.997249	0.00275133	0.0560671	-	1	24.7093	416	416	0.0226388	NonUniformIntronCover	1	14.5465	628	628	reps	0.0341816	0.0875332	0.0248492	0.0180624
Chr14	21499371	21499491	METTL3/ENSG00000165819.12/known-exon+anti-near	0	-	10	0.00275183	0.997248	0.00275183	0.654551	-	1	306.955	158	156	0.519221	-	1	268.909	245	244	reps	0.591527	0.734663	0.515309	0.52483
Chr16	88646197	88646754	CYBA/ENSG00000051523.11/clean	0	-	104	0.00276039	0.00276039	0.99724	0.00629295	-	1	12.235	1932	1928	0.0148523	-	1	34.5246	2290	2286	reps	0.00693744	0.00270719	0.012849	0.0199681
Chr6	30914344	30914804	VARS2/ENSG00000137411.18/known-exon	0	+	135	0.00277094	0.997229	0.00277094	0.660402	MinorIsoform	1	46.6718	21	13	0.378879	-	1	53.6794	79	71	reps	0.609266	0.742576	0.441473	0.296043
Chr16	18838232	18838356	SMG1/ENSG00000157106.17/clean	0	-	10	0.00278097	0.997219	0.00278097	0.120237	-	1	17.6304	128	128	0.0365869	NonUniformIntronCover	1	6.15217	157	157	reps	0.169733	0.0833333	0.0304933	0.0366492
Chr6	30589974	30590148	ABCF1/ENSG00000204574.13/clean	0	+	10	0.00279162	0.00279162	0.997208	0.00907664	-	1	12.0909	1318	1318	0.0234417	-	1	22.9242	954	954	reps	0.0133176	0.00545371	0.0186272	0.0286711
Chr17	38552132	38552446	SRCIN1/ENSG00000277363.5/clean	0	-	10	0.00279531	0.997205	0.00279531	0.403423	LowCover	1	2.70492	4	4	0.0389497	-	0.947368	1.45902	36	36	reps	0.5	0.371134	0.0423826	0.0261404
Chr12	56131316	56131476	ESYT1/ENSG00000139641.12/clean	0	+	10	0.00282747	0.997173	0.00282747	0.0184504	-	1	11.6167	614	614	0.00406079	-	1	3.23333	793	793	reps	0.0180505	0.0201492	0.00712589	0.00049753
Chr7	30631541	30632246	GARS1/ENSG00000106105.14/clean	0	+	10	0.00283982	0.99716	0.00283982	0.0166455	NonUniformIntronCover	1	27.8961	1641	1641	0.00573954	-	1	7.2043	1247	1247	reps	0.0151548	0.0178589	0.00532238	0.00659434
Chr11	6610278	6610461	ILK/ENSG00000166333.14/known-exon+anti-near+anti-over	0	+	10	0.00285002	0.99715	0.00285002	0.042206	-	1	31.507	715	714	0.0187119	-	1	16.7042	876	876	reps	0.0256605	0.0650103	0.0187837	0.0182389
Chr2	97158167	97158587	ANKRD36/ENSG00000135976.20/clean	0	+	10	0.00285002	0.99715	0.00285002	0.287609	NonUniformIntronCover	1	7.67073	19	17	0.0503153	-	0.673171	2.38415	45	44	reps	0.308017	0.286569	0.0134745	0.0433599
Chr12	8090299	8091768	NECAP1/ENSG00000089818.18/clean	0	+	54	0.00286346	0.997137	0.00286346	0.203617	-	1	41.6755	163	134	0.100696	-	1	22.0582	197	189	reps	0.15959	0.245944	0.0893208	0.107399
Chr5	178205046	178205841	HNRNPAB/ENSG00000197451.12/anti-near	0	+	10	0.00286798	0.00286798	0.997132	0.00671401	-	1	23.2794	3444	3431	0.0139743	NonUniformIntronCover	1	31.9587	2255	2244	reps	0.00580065	0.00753327	0.0130363	0.017121
Chr9	129010693	129012235	SH3GLB2/ENSG00000148341.17/anti-near	0	-	16	0.00287572	0.997124	0.00287572	0.421735	-	1	307.77	329	328	0.330831	NonUniformIntronCover	1	219.015	358	358	reps	0.393515	0.470772	0.350257	0.307866
Chr16	70555206	70556178	SF3B3/ENSG00000189091.13/clean	0	+	10	0.0028815	0.997119	0.0028815	0.010368	-	1	8.81088	841	839	0.00149247	NonUniformIntronCover	0.932432	1.89378	1267	1267	reps	0.0149593	0.00646697	0.00273164	0.000427931
Chr14	22974890	22974973	AJUBA/ENSG00000129474.16/clean	0	-	10	0.0028836	0.997116	0.0028836	0.115674	-	1	11.9032	91	83	0.036513	-	1	9.32258	246	244	reps	0.0961538	0.135615	0.0399226	0.0327869
Chr15	74838504	74838642	ULK3/ENSG00000140474.14/clean	0	-	10	0.00288505	0.997115	0.00288505	0.0856788	-	1	26.5192	283	278	0.0339213	NonUniformIntronCover	1	12.5	356	335	reps	0.0557123	0.156164	0.0406874	0.0214286
Chr11	65623644	65623928	PCNX3/ENSG00000197136.4/clean	0	+	10	0.00288981	0.99711	0.00288981	0.0557463	-	1	15.0545	255	249	0.0164289	NonUniformIntronCover	1	7.6	450	448	reps	0.0554784	0.0456472	0.0249285	0.00683606
Chr11	61779423	61779497	MYRF/ENSG00000124920.13/anti-over	0	+	10	0.00289643	0.997104	0.00289643	0.285714	-	1	10	25	24	0.0641628	-	1	4.73077	69	66	reps	0.307692	0.222222	0.0730838	0.063354
Chr14	74288259	74288715	ABCD4/ENSG00000119688.21/clean	0	-	66	0.00290208	0.997098	0.00290208	0.38654	MinorIsoform	1	66.1603	71	68	0.234659	-	1	56.109	173	168	reps	0.360613	0.427156	0.219472	0.248755
Chr15	44563301	44564546	SPG11/ENSG00000104133.15/anti-near	0	-	10	0.00290778	0.997092	0.00290778	0.720401	-	1	72.1434	28	28	0.422581	-	1	41.7152	56	56	reps	0.667059	0.777194	0.394467	0.440923
Chr2	74505770	74505951	PCGF1/ENSG00000115289.14/anti-near	0	-	10	0.00291319	0.00291319	0.997087	0.0455222	-	1	11.971	251	242	0.120593	NonUniformIntronCover	1	23.4493	170	164	reps	0.0344291	0.0466321	0.15128	0.089967
Chr16	1820014	1822299	HAGH/ENSG00000063854.13/clean	0	-	10	0.00291777	0.00291777	0.997082	0.0239133	NonUniformIntronCover	1	12.2986	502	499	0.0572118	-	1	29.6136	485	485	reps	0.0197363	0.0323089	0.0454348	0.0754596
Chr11	67439843	67440117	CORO1B/ENSG00000172725.14/anti-near	0	-	10	0.00291859	0.997081	0.00291859	0.0274963	-	1	18.9717	671	669	0.00913821	NonUniformIntronCover	1	7.40566	800	798	reps	0.027542	0.027479	0.0146535	0.00115203
Chr7	103311896	103312055	PMPCB/ENSG00000105819.14/anti-near	0	+	10	0.00292358	0.00292358	0.997076	0.0105747	NonUniformIntronCover	1	6.29508	589	589	0.0340699	-	1	20.2459	574	572	reps	0.0131853	0.00920411	0.0379497	0.0310205
Chr13	113180042	113180157	PCID2/ENSG00000126226.22/clean	0	-	10	0.00293724	0.997063	0.00293724	0.187817	-	1	53.4186	231	231	0.098375	-	1	26.186	240	240	reps	0.185292	0.19232	0.0846352	0.117637
Chr10	102735909	102737662	SFXN2/ENSG00000156398.13/clean	0	+	10	0.00295863	0.997041	0.00295863	0.118745	-	0.965577	22.3677	162	162	0.0522443	NonUniformIntronCover	0.930579	22.4907	400	399	reps	0.111117	0.132587	0.0812043	0.0365291
Chr1	202333093	202333236	UBE2T/ENSG00000077152.11/clean	0	-	10	0.00296236	0.00296236	0.997038	0.0517373	-	1	67.8182	1243	1235	0.0821633	-	1	78.4182	876	869	reps	0.0368852	0.0675719	0.0835257	0.0818958
Chr14	24145465	24145709	PSME2/ENSG00000100911.16/anti-near	0	-	10	0.00296276	0.997037	0.00296276	0.0293088	-	1	23.7021	767	767	0.0104459	-	1	8.20213	774	774	reps	0.0162717	0.0475286	0.0140462	0.00702366
Chr19	44819192	44819345	BCAM/ENSG00000187244.12/clean	0	+	10	0.00296357	0.00296357	0.997036	0.0314465	-	1	5	154	154	0.11512	-	1	19.2542	148	148	reps	0.0247151	0.0420248	0.190343	0.0639662
Chr11	112230230	112230625	PTS/ENSG00000150787.8/clean	0	+	10	0.00298315	0.00298315	0.997017	0.0506363	-	1	30.9355	485	485	0.095744	-	1	47.329	387	386	reps	0.0591368	0.0378788	0.0802893	0.117086
Chr15	41836940	41837067	JMJD7/ENSG00000243789.11/clean	0	+	10	0.00298842	0.997012	0.00298842	0.319912	-	1	21.6383	44	44	0.110108	-	1	8.04255	62	62	reps	0.274556	0.419202	0.160309	0.0344828
ChrX	154765530	154765906	DKC1/ENSG00000130826.18/clean	0	+	10	0.00300522	0.996995	0.00300522	0.0161084	-	1	19.5811	1189	1184	0.00426785	-	1	4.64189	1080	1079	reps	0.0139554	0.0182111	0.00399146	0.00410697
Chr19	43552908	43552981	XRCC1/ENSG00000073050.12/anti-near	0	-	10	0.00301246	0.00301246	0.996988	0.0235677	NonUniformIntronCover	1	4.2963	177	176	0.0848153	-	1	20.6667	217	217	reps	0.0372631	0	0.0969388	0.0707965
Chr7	2215999	2216156	MAD1L1/ENSG00000002822.15/clean	0	-	10	0.00303437	0.996966	0.00303437	0.025979	-	1	6.88136	258	255	0	NonUniformIntronCover	0	0	281	281	reps	0.015257	0.0438417	0	0
Chr17	7936817	7937163	CNTROB/ENSG00000170037.14/clean	0	+	10	0.00303785	0.00303785	0.996962	0.00639721	-	0.791667	1.29412	201	194	0.0513345	-	1	9.03676	167	150	reps	0.0042541	0.00873563	0.0302279	0.076756
Chr9	128484886	128485364	ODF2/ENSG00000136811.16/clean	0	+	10	0.00303815	0.996962	0.00303815	0.120085	NonUniformIntronCover	1	42.1702	309	299	0.0621006	-	0.893162	27.3457	412	409	reps	0.135401	0.0963441	0.0678914	0.0505635
Chr12	53307713	53307844	AAAS/ENSG00000094914.14/known-exon+anti-near	0	-	10	0.00305936	0.00305936	0.996941	0.0379384	-	1	15.1429	384	375	0.0816553	-	1	46.5918	524	513	reps	0.0358204	0.0413793	0.0868541	0.0757541
Chr22	50441026	50443865	PPP6R2/ENSG00000100239.16/anti-near	0	+	10	0.00306095	0.996939	0.00306095	0.262282	-	1	131.546	351	343	0.180724	-	0.908448	85.368	382	381	reps	0.242763	0.293979	0.171816	0.188698
Chr6	43045402	43045586	CUL7/ENSG00000044090.10/anti-over	0	-	10	0.00306164	0.996938	0.00306164	0.215976	-	1	14.6	52	52	0.0782689	-	1	12.1429	140	140	reps	0.203747	0.229878	0.0956072	0.0677821
Chr19	55230531	55230612	PPP6R1/ENSG00000105063.19/clean	0	-	10	0.00306354	0.996936	0.00306354	0.0697123	-	1	38.5172	513	512	0.0364116	-	1	29.9655	788	788	reps	0.0564066	0.0833663	0.0416667	0.0287865
Chr5	138184105	138184238	KIF20A/ENSG00000112984.12/anti-near	0	+	10	0.00306612	0.996934	0.00306612	0.0381657	-	1	15.0784	379	379	0.0112412	NonUniformIntronCover	1	7.54902	664	663	reps	0.0322842	0.0477295	0.015625	0.0080429
Chr1	39567846	39568801	PABPC4/ENSG00000090621.14/anti-over	0	-	30	0.00307309	0.996927	0.00307309	0.0724302	-	1	111.507	1426	1423	0.0473178	-	1	61.0916	1230	1229	reps	0.077792	0.0676391	0.0427653	0.0537321
Chr1	35743241	35743454	CLSPN/ENSG00000092853.14/known-exon+anti-near+anti-over	0	-	10	0.00308049	0.00308049	0.99692	0.0199203	-	1	5	246	246	0.0700915	NonUniformIntronCover	1	18.5422	246	246	reps	0.0377358	0.00689655	0.0653861	0.0773742
Chr19	8512492	8512603	ZNF414/ENSG00000133250.14/clean	0	-	10	0.00308195	0.00308195	0.996918	0.00267567	-	0.415842	0.292683	155	155	0.0452932	NonUniformIntronCover	1	7.78049	164	164	reps	0.00426873	0	0.0450506	0.0537634
Chr6	30651082	30651265	C6orf136/ENSG00000204564.12/anti-near	0	+	28	0.00308798	0.00308798	0.996912	0.0627059	NonUniformIntronCover	1	19.9365	284	284	0.13364	-	1	35.0159	216	216	reps	0.0870413	0.0308742	0.164915	0.102873
Chr3	184306834	184307356	PSMD2/ENSG00000175166.17/clean	0	+	10	0.00309582	0.00309582	0.996904	0.0125202	-	1	29.301	2311	2300	0.0247857	-	1	35.3786	1392	1388	reps	0.0129021	0.0143786	0.0262935	0.0231294
Chr15	44569505	44570524	SPG11/ENSG00000104133.15/clean	0	-	10	0.00310967	0.99689	0.00310967	0.186217	-	1	8.46667	35	35	0.0202877	NonUniformIntronCover	0.737364	1.55309	71	71	reps	0.131442	0.402067	0.0125896	0.0108864
Chr19	1271036	1271139	CIRBP/ENSG00000099622.14/anti-near	0	+	29	0.00311389	0.00311389	0.996886	0.016378	NonUniformIntronCover	1	17.3667	1043	1037	0.0368296	-	1	29.3667	768	767	reps	0.017366	0.0152921	0.038105	0.0355655
Chr1	51836212	51840225	NRDC/ENSG00000078618.21/clean	0	-	524	0.00312088	0.00312088	0.996879	0.00630086	NonUniformIntronCover	0.975064	5.63064	888	821	0.0220581	-	0.975064	19.849	880	824	reps	0.00677185	0.00591505	0.0164477	0.025089
Chr17	7930734	7931010	TRAPPC1/ENSG00000170043.12/clean	0	-	10	0.00312603	0.996874	0.00312603	0.0184881	-	1	34.0185	1806	1801	0.00797336	NonUniformIntronCover	1	14.0093	1743	1741	reps	0.0196595	0.0161805	0.0049761	0.0105786
Chr7	100682235	100682321	GIGYF1/ENSG00000146830.10/anti-near	0	-	10	0.00313673	0.00313673	0.996863	0.0136416	NonUniformIntronCover	1	4.09375	296	296	0.0529918	-	1	17.9062	316	316	reps	0.0244272	0.00262467	0.0518088	0.0542169
Chr9	130632278	130634666	FUBP3/ENSG00000107164.16/clean	0	+	56	0.00313741	0.996863	0.00313741	0.0822877	-	1	72.2709	806	620	0.0496554	NonUniformIntronCover	1	51.5707	987	775	reps	0.0593998	0.109088	0.0514657	0.0517553
Chr19	54145817	54145909	CNOT3/ENSG00000088038.19/clean	0	+	10	0.00314684	0.00314684	0.996853	0.00484312	NonUniformIntronCover	1	4.05882	834	832	0.0193505	-	1	17.0882	866	866	reps	0.00465481	0.005997	0.0112314	0.02754
Chr2	43899605	43901319	LRPPRC/ENSG00000138095.19/clean	0	-	10	0.00316778	0.996832	0.00316778	0.0339343	-	1	52.022	1481	1469	0.0169777	NonUniformIntronCover	1	19.3607	1117	1113	reps	0.0184792	0.0480496	0.0180197	0.0155772
Chr20	17943195	17947485	SNX5/ENSG00000089006.16/clean	0	-	381	0.00317522	0.996825	0.00317522	0.177624	NonUniformIntronCover	1	117.498	544	537	0.121757	-	1	98.7093	712	694	reps	0.153489	0.201977	0.100887	0.140405
Chr6	143502565	143503912	FUCA2/ENSG00000001036.14/anti-over	0	-	141	0.0031867	0.996813	0.0031867	0.0653373	-	1	42.0826	575	568	0.0325687	-	1	22.219	649	646	reps	0.0682826	0.0631558	0.0240573	0.0436742
Chr21	33575667	33575777	SON/ENSG00000159140.21/known-exon+anti-near+anti-over	0	+	10	0.0032079	0.996792	0.0032079	0.0322901	NonUniformIntronCover	1	16.25	487	487	0.00950789	-	1	6.825	711	711	reps	0.0247708	0.0404858	0.0183081	0.00249377
Chr8	144500199	144500266	PPP1R16A/ENSG00000160972.9/anti-over	0	+	10	0.00321406	0.996786	0.00321406	0.485166	-	1	118.739	122	121	0.313598	-	1	56.6522	124	121	reps	0.453273	0.525127	0.300417	0.32
ChrX	123696842	123697680	THOC2/ENSG00000125676.20/clean	0	-	10	0.00322439	0.996776	0.00322439	0.029928	-	1	4.19578	135	135	0.000893963	NonUniformIntronCover	0.269324	0	301	301	reps	0.02	0.0332039	0.00157189	0.000491796
Chr12	68648781	68650399	RAP1B/ENSG00000127314.18/clean	0	+	10	0.00322807	0.996772	0.00322807	0.0190256	-	1	29.3634	1514	1511	0.00758195	NonUniformIntronCover	1	11.9488	1557	1557	reps	0.0203521	0.0182776	0.00607096	0.00911304
Chr3	121490408	121493477	POLQ/ENSG00000051341.14/clean	0	-	10	0.00323456	0.996765	0.00323456	0.228435	-	0.996404	20.4286	64	64	0.0699419	NonUniformIntronCover	0.985616	6.16653	82	82	reps	0.229528	0.222781	0.0431521	0.111364
Chr14	22975104	22976455	AJUBA/ENSG00000129474.16/clean	0	-	158	0.00323627	0.996764	0.00323627	0.16937	-	1	16.1086	76	76	0.0632012	-	1	14.1002	206	204	reps	0.187262	0.149081	0.0692028	0.0574052
Chr20	47653072	47653405	NCOA3/ENSG00000124151.19/anti-near	0	+	10	0.00324867	0.00324867	0.996751	0.0447487	-	1	6.51145	139	139	0.150512	-	1	20.1985	114	114	reps	0.0669966	0.0264747	0.199175	0.111143
Chr20	34850060	34851230	GGT7/ENSG00000131067.17/clean	0	-	293	0.00325384	0.00325384	0.996746	0.112743	-	1	43.9658	334	325	0.192734	-	1	61.1197	236	220	reps	0.114929	0.112374	0.144441	0.252703
Chr1	114708192	114708530	NRAS/ENSG00000213281.5/clean	0	-	10	0.00325585	0.996744	0.00325585	0.0484827	NonUniformIntronCover	1	6.31818	124	124	0.00929177	-	1	5.67424	605	601	reps	0.0683571	0.0330682	0.00806369	0.00977553
Chr8	22566868	22567060	SORBS3/ENSG00000120896.13/anti-over	0	+	36	0.00325656	0.996743	0.00325656	0.0255477	-	1	10.0938	371	359	0.00169779	NonUniformIntronCover	0.666667	0.90625	392	385	reps	0.0217391	0.030303	0.003861	0
Chr17	7562263	7563065	SENP3/ENSG00000161956.13/clean	0	+	10	0.00325705	0.00325705	0.996743	0.0246415	NonUniformIntronCover	1	20.0849	795	795	0.0500095	-	1	41.5346	789	789	reps	0.0247664	0.0241073	0.0470504	0.061374
Chr2	182728658	182728862	DNAJC10/ENSG00000077232.18/clean	0	+	10	0.00326355	0.996736	0.00326355	0.0524724	-	1	13.3462	237	237	0.0132573	NonUniformIntronCover	1	5.60256	415	415	reps	0.0404218	0.0630631	0.00348786	0.0203418
Chr4	68320205	68322748	YTHDC1/ENSG00000083896.12/clean	0	-	10	0.00326991	0.99673	0.00326991	0.154384	NonUniformIntronCover	1	62.2562	341	296	0.0922226	-	1	49.2719	485	449	reps	0.113624	0.182931	0.0799098	0.101265
Chr1	109270133	109270425	CELSR2/ENSG00000143126.8/known-exon	0	+	10	0.00327225	0.00327225	0.996728	0.102466	NonUniformIntronCover	1	15.5263	136	134	0.228824	-	1	40.9474	138	138	reps	0.073563	0.146227	0.306185	0.1478
Chr4	1801536	1801619	FGFR3/ENSG00000068078.18/clean	0	+	10	0.00327683	0.996723	0.00327683	0.0398818	-	1	27	647	647	0.0146819	NonUniformIntronCover	1	9	603	603	reps	0.031477	0.0515237	0.0146628	0.0147059
Chr1	1050329	1050426	AGRN/ENSG00000188157.15/clean	0	+	10	0.00329893	0.996701	0.00329893	0.0747575	-	1	24.8857	302	302	0.0332397	NonUniformIntronCover	1	18.2571	521	521	reps	0.0585372	0.0990281	0.0462911	0.00958227
Chr7	66083174	66086584	ASL/ENSG00000126522.17/clean	0	+	10	0.00330395	0.996696	0.00330395	0.153153	MinorIsoform	0.918824	4.15956	16	11	0.0119788	-	0.661471	1.06691	87	85	reps	0.0970455	0.300987	0.0113933	0.00728441
Chr11	8096806	8097227	TUB/ENSG00000166402.9/clean	0	+	10	0.00330904	0.996691	0.00330904	0.173729	-	1	8.2	39	38	0.0482113	NonUniformIntronCover	1	11.0424	213	213	reps	0.103029	0.214909	0.0379899	0.0644068
Chr9	35752145	35752650	RGP1/ENSG00000107185.10/anti-near	0	+	10	0.00330966	0.99669	0.00330966	0.0284985	-	1	5.77889	176	176	0	-	0	0	250	250	reps	0.0261148	0.0336331	0	0
Chr1	145995291	145995403	TXNIP/ENSG00000265972.6/clean	0	-	10	0.00331056	0.00331056	0.996689	0.00310209	-	1	1.57143	505	505	0.026203	NonUniformIntronCover	1	7.85714	292	292	reps	0.00598802	0.00294118	0.0348331	0.0199005
Chr12	2821359	2821542	ITFG2/ENSG00000111203.13/anti-near	0	+	10	0.00332363	0.00332363	0.996676	0.00970285	NonUniformIntronCover	1	1.57746	161	159	0.0801493	-	1	10.2817	118	117	reps	0.0181145	0.0031372	0.133185	0.0399227
Chr17	63832991	63833068	SMARCD2/ENSG00000108604.16/anti-near	0	-	10	0.0033313	0.0033313	0.996669	0.0205451	-	1	20.0741	951	951	0.0436399	-	1	33.037	724	724	reps	0.0155722	0.028291	0.0359745	0.0524791
Chr3	155833585	155833856	SLC33A1/ENSG00000169359.16/known-exon	0	-	10	0.0033392	0.996661	0.0033392	0.122289	-	1	16.1619	116	111	0.0403173	NonUniformIntronCover	1	8.27619	194	191	reps	0.0860735	0.158371	0.0460035	0.0334932
Chr10	68363684	68363983	RUFY2/ENSG00000204130.13/clean	0	-	10	0.00334362	0.996656	0.00334362	0.0869565	-	1	3.33333	35	35	0.00785176	-	1	1.49573	188	188	reps	0.125	0.0629291	0.00516351	0.00862069
Chr5	65551636	65552492	CENPK/ENSG00000123219.13/clean	0	-	10	0.00334959	0.99665	0.00334959	0.0574518	-	1	16.5794	272	265	0.0175157	NonUniformIntronCover	1	6.66765	373	369	reps	0.0387948	0.0738068	0.0138346	0.0222671
Chr5	149362843	149364035	PCYOX1L/ENSG00000145882.11/clean	0	+	70	0.00335544	0.00335544	0.996645	0.00546177	-	0.37344	0.184444	68	67	0.111863	NonUniformIntronCover	0.806595	3.52667	28	28	reps	0	0.0102668	0.105012	0.123201
Chr5	176529818	176530081	RNF44/ENSG00000146083.12/clean	0	-	10	0.00335586	0.996644	0.00335586	0.293408	-	1	36.1262	87	80	0.151059	-	1	30.9612	174	166	reps	0.294422	0.300197	0.128104	0.161293
Chr19	35730462	35730537	KMT2B/ENSG00000272333.7/clean	0	+	10	0.00335646	0.996644	0.00335646	0.214408	-	1	51.037	187	165	0.105187	-	1	18.9259	161	161	reps	0.216159	0.212121	0.156901	0.0374332
Chr22	46287154	46288422	TTC38/ENSG00000075234.17/clean	0	+	10	0.00335859	0.00335859	0.996641	0.0365298	-	1	20.5119	540	539	0.0802676	-	1	30.1091	341	341	reps	0.0323298	0.0364838	0.0777429	0.0724319
Chr17	50346275	50353629	XYLT2/ENSG00000015532.10/clean	0	+	10	0.00336267	0.00336267	0.996637	0.0904874	-	0.955882	13.5306	136	125	0.232333	NonUniformIntronCover	0.955882	22.0933	66	65	reps	0.0745885	0.122184	0.185977	0.307105
Chr6	30590378	30590534	ABCF1/ENSG00000204574.13/anti-near	0	+	10	0.00336394	0.00336394	0.996636	0.0119499	-	1	12.3	998	996	0.0301113	NonUniformIntronCover	1	24.4333	784	784	reps	0.0172312	0.00659707	0.0347517	0.0223604
Chr6	33784427	33786733	LEMD2/ENSG00000161904.12/clean	0	-	10	0.00336999	0.00336999	0.99663	0.058106	NonUniformIntronCover	1	14.3739	227	227	0.127303	-	1	40.9902	277	276	reps	0.0535208	0.0602473	0.112935	0.146455
Chr6	43444938	43445124	ABCC10/ENSG00000124574.15/clean	0	+	10	0.00337288	0.996627	0.00337288	0.126866	NonUniformIntronCover	1	13.2222	91	84	0.0208333	-	0.880682	2	94	86	reps	0.0833333	0.192523	0.0444444	0.000668003
Chr19	12710773	12711295	TNPO2/ENSG00000105576.15/clean	0	-	10	0.00337737	0.00337737	0.996623	0.0335497	-	1	14.9272	430	419	0.0768939	NonUniformIntronCover	1	35.4854	426	420	reps	0.0366621	0.0295441	0.0796228	0.0774461
Chr7	73737110	73737220	ABHD11/ENSG00000106077.18/known-exon+anti-near	0	-	10	0.00338162	0.00338162	0.996618	0.136355	-	1	17.525	111	86	0.285303	NonUniformIntronCover	1	49.5	124	99	reps	0.168831	0.0935391	0.296375	0.267677
Chr11	47788611	47791929	NUP160/ENSG00000030066.13/clean	0	-	10	0.00338256	0.996617	0.00338256	0.0415091	-	1	33.173	766	745	0.0169178	-	1	12.5453	729	727	reps	0.0353056	0.0425498	0.0193794	0.0154964
Chr4	67634322	67634428	UBA6/ENSG00000033178.13/clean	0	-	10	0.00338783	0.996612	0.00338783	0.0425056	-	1	4.75	107	94	0	NonUniformIntronCover	0	0	177	176	reps	0.0277778	0.049505	0	0
Chr11	47179279	47179410	PACSIN3/ENSG00000165912.16/clean	0	-	10	0.00338797	0.996612	0.00338797	0.020316	-	1	3.85714	183	183	0.00160772	-	0.983471	1	617	616	reps	0.0218978	0.0119347	0	0.00310559
Chr3	196242090	196242561	PCYT1A/ENSG00000161217.12/anti-over	0	-	78	0.00339715	0.00339715	0.996603	0.00886709	NonUniformIntronCover	1	2.30818	248	248	0.0506445	-	1	10.4025	194	194	reps	0.00251506	0.0112605	0.060964	0.0364209
Chr7	2375527	2376949	EIF3B/ENSG00000106263.18/clean	0	+	10	0.00339979	0.9966	0.00339979	0.0366502	-	1	45.235	1189	1188	0.0210597	-	1	55.6749	2587	2587	reps	0.0358324	0.0384073	0.0192175	0.0226972
Chr20	63944734	63945650	UCKL1/ENSG00000198276.16/clean	0	-	10	0.00340531	0.996595	0.00340531	0.0383091	-	1	23.4231	587	582	0.0125461	NonUniformIntronCover	1	7.68681	605	593	reps	0.0533394	0.0240806	0.016873	0.00799045
Chr14	20298888	20299297	TTC5/ENSG00000136319.12/clean	0	-	10	0.00340691	0.996593	0.00340691	0.0390782	NonUniformIntronCover	1	5.57143	137	121	0	-	0	0	179	179	reps	0.057971	0.0261279	0	0
Chr17	75628442	75628671	RECQL5/ENSG00000108469.15/anti-near	0	-	10	0.00341094	0.996589	0.00341094	0.0887372	-	1	7.30337	75	71	0.00544959	NonUniformIntronCover	0.684932	0.955056	125	125	reps	0.0405628	0.241343	0.00838504	0
Chr20	63566231	63566377	HELZ2/ENSG00000130589.16/clean	0	-	10	0.00341481	0.996585	0.00341481	0.122363	NonUniformIntronCover	1	7.25	52	49	0.00706164	-	0.433824	0.339286	61	61	reps	0.0645161	0.185841	0.0102235	0.0122324
Chr11	66531742	66531950	AP002748.5/ENSG00000256349.1/known-exon+anti-near+anti-over	0	+	10	0.00341788	0.00341788	0.996582	0.0527591	NonUniformIntronCover	1	11.975	215	213	0.147354	-	1	14.8625	86	81	reps	0.0782609	0.0268716	0.153878	0.137134
Chr19	55245402	55245491	PPP6R1/ENSG00000105063.19/clean	0	-	10	0.00342687	0.996573	0.00342687	0.0184096	-	1	6.54545	349	349	0.00281294	NonUniformIntronCover	1	2	709	709	reps	0.0108696	0.0264971	0.0060241	0
Chr19	50417097	50417171	AC020909.1/ENSG00000142539.9/clean	0	+	10	0.00343397	0.996566	0.00343397	0.0637922	-	1	52.8077	775	774	0.0341242	-	1	27.7692	786	784	reps	0.0521334	0.0846442	0.0463812	0.0209424
Chr11	64233980	64234072	DNAJC4/ENSG00000110011.13/known-exon+anti-near+anti-over	0	+	10	0.00343634	0.00343634	0.996564	0.386029	-	1	71.6765	114	110	0.575057	-	1	127.206	94	92	reps	0.378	0.399809	0.609713	0.521448
Chr7	107919099	107919193	DLD/ENSG00000091140.14/anti-near	0	+	10	0.00344018	0.99656	0.00344018	0.0111647	-	1	4.76471	422	422	0	-	0	0	672	672	reps	0.004	0.0212978	0	0
Chr10	109875599	109877789	XPNPEP1/ENSG00000108039.18/clean	0	-	77	0.00344667	0.00344667	0.996553	0.0332531	-	1	26.6576	766	762	0.0660335	-	1	38.0378	533	528	reps	0.0324289	0.0329269	0.0560439	0.0692
Chr20	48989436	48989555	ARFGEF2/ENSG00000124198.9/clean	0	+	10	0.00345003	0.99655	0.00345003	0.0565846	NonUniformIntronCover	1	6.17778	102	102	0.00107817	-	0.146789	0	136	136	reps	0.0196078	0.0921203	0.0024006	0
Chr1	1355345	1355449	MXRA8/ENSG00000162576.16/clean	0	-	10	0.0034904	0.0034904	0.99651	0.362319	-	1	12.5	22	22	0.791025	-	1	94.6316	25	25	reps	0.357294	0.393617	0.717021	0.840519
Chr8	109334474	109336127	ENY2/ENSG00000120533.13/anti-near	0	+	10	0.0034933	0.996507	0.0034933	0.0248916	MinorIsoform	1	11.2064	308	305	0.00751392	-	0.983567	8.38088	925	920	reps	0.0170657	0.0325581	0.0031725	0.0150508
Chr6	33206449	33206637	HSD17B8/ENSG00000204228.4/clean	0	+	10	0.00350571	0.996494	0.00350571	0.239155	-	1	5.97222	19	19	0.0337372	NonUniformIntronCover	1	2.51389	72	72	reps	0.213592	0.541401	0.0309951	0.0317241
Chr9	136946689	136946767	C8G/ENSG00000176919.13/clean	0	+	10	0.00350571	0.00350571	0.996494	0.166667	-	1	3	15	15	1	LowCover	1	6	0	0	reps	0.0833333	0.333333	1	1
Chr12	132680222	132680606	POLE/ENSG00000177084.18/clean	0	-	10	0.00351338	0.996487	0.00351338	0.150884	-	1	48.3333	267	265	0.0812733	-	1	31.8467	359	356	reps	0.133169	0.181357	0.0753484	0.0943677
Chr1	42929780	42929872	SLC2A1/ENSG00000117394.23/clean	0	-	10	0.00353394	0.00353394	0.996466	0.00826131	NonUniformIntronCover	1	3.82353	459	456	0.039823	-	1	9	217	217	reps	0.00739256	0.00915538	0.0583333	0.0188679
Chr10	71296742	71297908	UNC5B/ENSG00000107731.12/clean	0	+	40	0.0035626	0.996437	0.0035626	0.0886915	-	1	19.6593	190	189	0.0388113	-	1	19.3009	452	452	reps	0.0532173	0.13836	0.0301642	0.0478472
Chr1	36137322	36137795	TRAPPC3/ENSG00000054116.12/known-exon	0	-	10	0.0035657	0.0035657	0.996434	0.0269734	-	1	28.4973	1028	994	0.0502653	-	1	47.3155	894	877	reps	0.0244659	0.0284695	0.0401124	0.0677573
Chr11	66843069	66843168	C11orf80/ENSG00000173715.17/anti-near	0	+	10	0.00356594	0.00356594	0.996434	0.0777233	-	1	10.7027	127	125	0.223233	-	1	17.2432	60	60	reps	0.116125	0.0192771	0.250698	0.202364
Chr11	65619660	65619753	PCNX3/ENSG00000197136.4/clean	0	+	10	0.00357157	0.996428	0.00357157	0.194231	MinorIsoform	1	41.9429	174	128	0.106175	-	1	36.9429	311	245	reps	0.148975	0.317406	0.132436	0.0684932
Chr9	136455793	136456052	SEC16A/ENSG00000148396.18/clean	0	-	10	0.003586	0.996414	0.003586	0.0483683	-	1	20.9406	398	397	0.0141324	-	1	5.63366	391	391	reps	0.0644555	0.0301374	0.0117892	0.0146019
Chr19	55159449	55159532	DNAAF3/ENSG00000167646.14/known-exon+anti-near+anti-over	0	-	10	0.0035891	0.0035891	0.996411	0.00747791	-	0.60274	0.741935	80	80	0.117395	-	1	9.70968	73	72	reps	0	0.0132172	0.150685	0.0789474
Chr3	180985996	180986942	DNAJC19/ENSG00000205981.8/anti-near	0	-	10	0.003592	0.996408	0.003592	0.0485883	-	1	13.891	272	240	0.0181541	NonUniformIntronCover	1	15.8457	857	712	reps	0.0433818	0.0525264	0.00841936	0.0293079
Chr3	184142603	184142778	EIF2B5/ENSG00000145191.15/clean	0	+	10	0.00360029	0.9964	0.00360029	0.0321301	-	1	13.1791	395	395	0.00341297	NonUniformIntronCover	0.715152	1	292	292	reps	0.0324105	0.0327238	0.0031893	0.00152876
Chr11	62782333	62782692	TAF6L/ENSG00000162227.8/anti-over	0	+	10	0.00360078	0.00360078	0.996399	0.102888	-	1	34.8652	304	295	0.186224	-	1	45.539	199	197	reps	0.128514	0.0753665	0.179486	0.197126
Chr15	72242699	72250019	PARP6/ENSG00000137817.17/clean	0	-	90	0.00360288	0.00360288	0.996397	0.016132	NonUniformIntronCover	0.995851	8.26383	504	491	0.0473867	-	0.972614	19.4499	391	375	reps	0.0125207	0.0205198	0.0313592	0.0625823
Chr16	29805026	29805114	KIF22/ENSG00000079616.13/anti-near	0	+	10	0.00360856	0.00360856	0.996391	0.0409103	NonUniformIntronCover	1	43.5938	1022	953	0.0733788	-	1	43	543	539	reps	0.0370866	0.0465671	0.088726	0.0581184
Chr8	144085479	144085572	GPAA1/ENSG00000197858.11/clean	0	+	10	0.00362683	0.996373	0.00362683	0.137725	NonUniformIntronCover	1	82.2571	515	496	0.0860553	-	1	54.8	582	576	reps	0.135035	0.147564	0.0770153	0.0975772
Chr2	47480871	47482778	MSH2/ENSG00000095002.15/clean	0	+	10	0.00363341	0.996367	0.00363341	0.0705774	-	1	61.1291	805	786	0.0393016	-	1	30.9684	757	751	reps	0.0687169	0.0790145	0.0328517	0.0456992
ChrX	154366224	154366307	FLNA/ENSG00000196924.18/clean	0	-	10	0.00363839	0.996362	0.00363839	0.0229395	-	1	27.2581	933	933	0.0116191	-	1	39.1935	3006	3006	reps	0.0198675	0.0253081	0.0194831	0.00322713
Chr16	1974107	1974196	TBL3/ENSG00000183751.15/anti-near	0	+	26	0.00364957	0.99635	0.00364957	0.0703797	-	1	25.7407	334	333	0.0251545	NonUniformIntronCover	1	8.59259	333	330	reps	0.0501759	0.0955784	0.0286217	0.0181818
Chr20	35473552	35473869	CEP250/ENSG00000126001.16/anti-near	0	+	10	0.0036544	0.996346	0.0036544	0.153912	NonUniformIntronCover	1	8.73171	48	48	0.015873	-	0.70684	1	62	62	reps	0.210092	0.114872	0.0217391	0
Chr1	43975848	43976089	ATP6V0B/ENSG00000117410.14/clean	0	+	45	0.00366442	0.00366442	0.996336	0.016969	NonUniformIntronCover	1	38.0625	1978	1978	0.0311393	-	1	41.3	1107	1107	reps	0.0159663	0.0183331	0.0279811	0.0376632
Chr2	127496148	127498139	IWS1/ENSG00000163166.15/anti-over	0	-	10	0.00368509	0.996315	0.00368509	0.0933186	-	1	31.8033	309	287	0.044262	-	1	19.2194	415	405	reps	0.0840007	0.105471	0.0422648	0.0475878
Chr16	650167	650253	WDR90/ENSG00000161996.19/anti-near	0	+	10	0.00369655	0.996303	0.00369655	0.0394737	-	1	6	146	143	0.00357143	-	1	1	279	278	reps	0.045977	0.0307692	0.00775194	0
Chr2	241081793	241082276	SNED1/ENSG00000162804.14/anti-over	0	+	10	0.00369657	0.996303	0.00369657	0.145541	NonUniformIntronCover	0.575053	2.55497	15	15	0.00276	-	0.15222	0	55	51	reps	0.240053	0.0590186	0.00560617	0
ChrX	51895760	51896408	MAGED1/ENSG00000179222.18/clean	0	+	190	0.0037033	0.996297	0.0037033	0.0155147	NonUniformIntronCover	1	25.7663	1635	1626	0.00670775	-	1	16.5652	2453	2452	reps	0.0122371	0.0221734	0.00307613	0.00938613
Chr5	159159035	159161265	RNF145/ENSG00000145860.11/clean	0	-	10	0.00370545	0.996295	0.00370545	0.0486421	-	1	11.5552	226	225	0.0147714	NonUniformIntronCover	0.944144	6.35698	424	419	reps	0.0600301	0.0486514	0.00715673	0.0173172
Chr16	4811294	4811622	GLYR1/ENSG00000140632.17/clean	0	-	10	0.00371613	0.996284	0.00371613	0.0118492	-	1	15.4688	1290	1273	0.000856534	-	0.672956	0.929688	785	785	reps	0.0070015	0.0141599	0.000649888	0.00111249
Chr1	155212219	155212384	MTX1/ENSG00000173171.14/anti-over	0	+	10	0.00372406	0.996276	0.00372406	0.0661492	-	1	35.9841	383	383	0.0317782	-	1	18.4127	446	443	reps	0.0508346	0.0845337	0.0222172	0.0461838
Chr22	50283186	50283336	PLXNB2/ENSG00000196576.15/clean	0	-	10	0.00374089	0.996259	0.00374089	0.143041	-	1	107.161	568	568	0.0953742	-	1	70.3214	643	643	reps	0.126225	0.169149	0.10861	0.0782515
Chr1	206729099	206729395	MAPKAPK2/ENSG00000162889.11/clean	0	+	10	0.00375812	0.996242	0.00375812	0.0303841	-	0.898601	6.26724	195	195	0.00178679	NonUniformIntronCover	0.674825	0.931034	375	371	reps	0.0466286	0.00970874	0.00388557	6.85542e-05
Chr11	66284783	66284872	YIF1A/ENSG00000174851.16/known-exon+anti-near+anti-over	0	-	14	0.0037711	0.996229	0.0037711	0.0718871	-	1	41.9032	541	541	0.0385055	-	1	29.3548	732	731	reps	0.0743347	0.0673352	0.056458	0.0178946
Chr11	93181786	93182805	SLC36A4/ENSG00000180773.15/clean	0	-	10	0.00377519	0.996225	0.00377519	0.0365832	-	1	5.01235	132	106	0.00185754	NonUniformIntronCover	0.593657	0.920988	319	275	reps	0.0400569	0.0303595	0.00401109	0.00196289
Chr1	41028319	41028583	SCMH1/ENSG00000010803.16/anti-over	0	-	61	0.00378068	0.996219	0.00378068	0.100915	NonUniformIntronCover	1	23.7952	212	189	0.0365256	-	1	8.79518	232	232	reps	0.095027	0.107311	0.00959986	0.0667802
Chr19	49884559	49884658	TBC1D17/ENSG00000104946.13/anti-near	0	+	10	0.00378639	0.00378639	0.996214	0.00784314	-	1	2	251	251	0.0516129	NonUniformIntronCover	1	8	147	147	reps	0.00694444	0.00900901	0.0684932	0.0365854
Chr20	21333618	21333703	XRN2/ENSG00000088930.8/clean	0	+	10	0.00378887	0.996211	0.00378887	0.0121065	-	1	5	408	404	0.000715654	NonUniformIntronCover	0.453333	0.387097	633	626	reps	0.00595238	0.0163265	0	0.0013085
Chr12	69256842	69257731	CPSF6/ENSG00000111605.18/clean	0	+	10	0.00379661	0.996203	0.00379661	0.0266777	-	1	25.2436	921	912	0.010253	NonUniformIntronCover	1	10.8669	1048	1046	reps	0.0198146	0.0289599	0.0136245	0.00723247
Chr8	144138813	144139008	HGH1/ENSG00000235173.7/anti-near	0	+	10	0.00380107	0.996199	0.00380107	0.133577	-	1	30.68	199	196	0.0608971	NonUniformIntronCover	1	16.1467	249	246	reps	0.120283	0.162766	0.0807922	0.0403467
Chr17	45244899	45244978	FMNL1/ENSG00000184922.14/anti-near	0	+	10	0.0038045	0.0038045	0.996196	0.0625	-	1	4	60	60	0.254078	-	1	13.9655	41	41	reps	0.0512821	0.08	0.217391	0.280475
Chr10	73791499	73791858	ZSWIM8/ENSG00000214655.10/anti-near	0	+	10	0.00381857	0.996181	0.00381857	0.0496324	-	1	13.2128	204	204	0.00734131	-	0.82808	1.38298	162	162	reps	0.0296187	0.0735564	0.00475285	0.00464556
Chr12	123621920	123622635	EIF2B1/ENSG00000111361.13/anti-near	0	-	10	0.0038253	0.996175	0.0038253	0.086149	-	1	53.0742	552	552	0.0495322	NonUniformIntronCover	1	41.7951	800	800	reps	0.0873491	0.0857733	0.0463662	0.0522224
Chr16	57752928	57753076	KATNB1/ENSG00000140854.13/clean	0	+	10	0.00382815	0.00382815	0.996172	0.0207429	NonUniformIntronCover	1	3.07143	139	139	0.0841914	-	1	29.7857	314	314	reps	0.0119048	0.0355556	0.101327	0.0702639
Chr8	144317712	144317783	DGAT1/ENSG00000185000.12/anti-near	0	-	10	0.00383292	0.00383292	0.996167	0.0570128	-	1	21.04	348	343	0.120777	-	1	31.32	228	227	reps	0.0327929	0.0884407	0.110236	0.124543
Chr1	1287596	1287672	SCNN1D/ENSG00000162572.21/known-exon+anti-near	0	+	10	0.00383841	0.00383841	0.996162	0.155556	-	1	3.5	19	19	0.613793	-	1	41.3214	26	26	reps	0.142857	0.179916	0.62226	0.6
Chr12	57105339	57105467	STAT6/ENSG00000166888.12/clean	0	-	10	0.0038402	0.99616	0.0038402	0.0481928	-	1	8	158	158	0.00564972	NonUniformIntronCover	0.601695	1.1875	209	209	reps	0.029703	0.0769231	0.00381264	0.00702901
Chr1	156548243	156548347	IQGAP3/ENSG00000183856.11/clean	0	-	10	0.00384127	0.996159	0.00384127	0.101375	-	1	14.5526	120	115	0.028133	NonUniformIntronCover	1	4.34211	148	148	reps	0.0840469	0.131148	0.041087	0.0136986
Chr10	90915641	90915781	ANKRD1/ENSG00000148677.6/clean	0	-	10	0.00384664	0.00384664	0.996153	0.0253773	-	1	38.25	1469	1463	0.0461566	-	1	40.1154	829	828	reps	0.0318702	0.0235169	0.0481198	0.0419196
Chr8	22102628	22102792	FAM160B2/ENSG00000158863.22/anti-near	0	+	10	0.00385084	0.996149	0.00385084	0.158948	-	1	27.4032	145	144	0.0685981	-	1	14.4355	196	196	reps	0.163347	0.148936	0.0959703	0.0337079
Chr10	94357331	94358082	NOC3L/ENSG00000173145.11/known-exon	0	-	10	0.00385428	0.996146	0.00385428	0.0865862	-	1	30.8081	325	310	0.0390589	NonUniformIntronCover	1	15.2424	375	370	reps	0.0984256	0.0818	0.0582797	0.0271057
Chr17	75286459	75286632	SLC25A19/ENSG00000125454.12/clean	0	-	10	0.00385664	0.996143	0.00385664	0.0467781	NonUniformIntronCover	1	12.6119	257	240	0.0102041	-	1	3	291	276	reps	0.0411939	0.049242	0.00253218	0.0201342
Chr5	148410765	148414135	FBXO38/ENSG00000145868.17/clean	0	+	10	0.00385801	0.996142	0.00385801	0.322998	MinorIsoform	1	17.1756	35	18	0.110417	-	1	8.31622	67	61	reps	0.242129	0.38742	0.0912121	0.129013
Chr7	111739243	111739395	DOCK4/ENSG00000128512.23/clean	0	-	10	0.00386707	0.00386707	0.996133	0	-	0	0	26	26	0.26439	-	1	9.34483	26	24	reps	0	0	0.2	0.289796
Chr6	44150310	44150563	TMEM63B/ENSG00000137216.19/clean	0	+	10	0.00390142	0.00390142	0.996099	0.000783239	-	0.263374	0	334	333	0.0232941	-	1	5.15152	216	213	reps	0.00125089	0.000506233	0.0296002	0.0254237
Chr1	150077231	150077668	VPS45/ENSG00000136631.15/clean	0	+	10	0.00390185	0.996098	0.00390185	0.170311	-	1	30.3801	146	144	0.0777083	NonUniformIntronCover	1	19.6316	232	231	reps	0.149858	0.19243	0.0529419	0.0914611
Chr16	284593	284658	PDIA2/ENSG00000185615.16/anti-near	0	+	10	0.00390677	0.00390677	0.996093	0.109589	NonUniformIntronCover	1	8	65	64	0.32969	-	1	15.7391	32	32	reps	0.104167	0.12	0.407407	0.223629
Chr6	43018556	43018632	KLHDC3/ENSG00000124702.18/clean	0	+	10	0.0039068	0.996093	0.0039068	0.0233067	NonUniformIntronCover	1	31.9286	1338	1337	0.00901178	-	1	8.35714	919	919	reps	0.0232868	0.0232746	0.0128082	0.00488998
Chr16	28608388	28608477	SULT1A1/ENSG00000196502.11/anti-near	0	-	10	0.00391267	0.996087	0.00391267	0.0539109	-	1	10.4848	184	178	0.0135144	-	1	6.57576	480	473	reps	0.0366342	0.130841	0.0214724	0.00749186
Chr6	31269385	31269492	HLA-C/ENSG00000204525.16/clean	0	-	12	0.00391401	0.996086	0.00391401	0.0110662	-	1	25.0769	2231	2225	0.00373955	-	1	7.58974	2019	2012	reps	0.00811296	0.014451	0.000311929	0.00792752
Chr17	42979444	42979549	PTGES3L-AARSD1/ENSG00000108825.17/clean	0	-	10	0.00392181	0.996078	0.00392181	0.321083	MinorIsoform	1	8.51282	18	7	0.0621242	-	1	2.38462	36	32	reps	0.48972	0.135081	0.0994671	0.0416667
Chr20	62129952	62130218	LSM14B/ENSG00000149657.20/clean	0	+	10	0.00392206	0.00392206	0.996078	0.02442	NonUniformIntronCover	1	10.7885	431	377	0.0642423	-	1	23.0673	294	283	reps	0.00816915	0.0468824	0.0641988	0.0661224
Chr9	5773080	5773957	RIC1/ENSG00000107036.12/anti-over	0	+	134	0.00392332	0.00392332	0.996077	0.0604031	-	1	10.7358	167	167	0.158987	NonUniformIntronCover	1	24.1973	128	128	reps	0.0502493	0.0687496	0.161573	0.154019
Chr19	50820035	50820153	KLK1/ENSG00000167748.11/anti-near	0	-	10	0.00393351	0.996066	0.00393351	0.216949	NonUniformIntronCover	1	5.81818	21	21	0.0437518	-	1	3.47727	76	76	reps	0.159236	0.25	0.0739986	0.0217391
Chr19	6743114	6743193	TRIP10/ENSG00000125733.18/clean	0	+	10	0.00393715	0.00393715	0.996063	0.00854701	-	1	4	464	459	0.0358209	NonUniformIntronCover	1	12	323	322	reps	0.0132743	0.00413223	0.0173913	0.0761905
Chr21	43658320	43659385	HSF2BP/ENSG00000160207.9/anti-near	0	-	10	0.00394503	0.00394503	0.996055	0.0746775	NonUniformIntronCover	0.906161	2.34043	29	24	0.419608	-	0.969668	7.95272	11	11	reps	0.0426497	0.100598	0.233233	0.663886
Chr2	85609067	85609434	C2orf68/ENSG00000168887.11/anti-over	0	-	10	0.00397678	0.996023	0.00397678	0.139806	-	1	24.2168	149	147	0.0660566	-	1	25.3916	359	357	reps	0.100877	0.192405	0.0373404	0.0997215
Chr6	138915976	138917554	REPS1/ENSG00000135597.18/clean	0	-	10	0.00399057	0.996009	0.00399057	0.0658543	-	1	26.4363	375	370	0.0255254	NonUniformIntronCover	1	10.1895	389	382	reps	0.0747445	0.0567556	0.0310324	0.0216538
Chr10	73192698	73193476	FAM149B1/ENSG00000138286.15/anti-over	0	+	10	0.0040028	0.995997	0.0040028	0.0625068	NonUniformIntronCover	1	3.73377	56	56	0.00319653	-	0.388021	0.220779	121	121	reps	0.0197135	0.0739243	0.0093752	0
Chr3	39391620	39391852	SLC25A38/ENSG00000144659.13/clean	0	+	10	0.0040074	0.0040074	0.995993	0.12236	NonUniformIntronCover	1	39.4556	282	278	0.217479	-	1	43.0778	150	149	reps	0.140227	0.0985896	0.159688	0.308792
Chr7	21903114	21904109	CDCA7L/ENSG00000164649.20/anti-near	0	-	10	0.00401151	0.995988	0.00401151	0.0678299	-	1	9.60506	131	129	0.0205573	-	1	8.01772	382	382	reps	0.0761087	0.0485203	0.019785	0.022888
Chr5	306760	311292	PDCD6/ENSG00000249915.8/clean	0	+	210	0.00402192	0.00402192	0.995978	0.027693	MinorIsoform	0.998149	32.9249	839	830	0.0498196	-	1	54.3717	831	817	reps	0.0255135	0.0289321	0.0401361	0.0589213
Chr20	34914171	34914322	ACSS2/ENSG00000131069.20/clean	0	+	10	0.00404517	0.995955	0.00404517	0.089233	NonUniformIntronCover	1	6.36842	64	64	0	-	0	0	85	85	reps	0.0987415	0.0588235	0	0
Chr16	28956058	28956150	NFATC2IP/ENSG00000176953.12/anti-over	0	+	10	0.00404967	0.99595	0.00404967	0.260315	-	1	51.0294	130	130	0.15664	-	1	57.2059	300	298	reps	0.202457	0.32706	0.123119	0.197708
Chr7	151075508	151075605	SLC4A2/ENSG00000164889.14/anti-over	0	+	10	0.00405414	0.00405414	0.995946	0.0367671	NonUniformIntronCover	1	28.9714	759	725	0.0697316	-	1	38.8286	518	497	reps	0.0335726	0.0410528	0.0875728	0.0426646
Chr6	31691680	31691803	ABHD16A/ENSG00000204427.12/clean	0	-	10	0.00406919	0.995931	0.00406919	0.134593	-	1	35.1489	181	181	0.0466949	-	1	6.80851	135	135	reps	0.0810261	0.193236	0.0497433	0.0454303
Chr20	63687770	63687936	RTEL1/ENSG00000258366.9/clean	0	+	10	0.00407279	0.995927	0.00407279	0.307266	-	1	35.4844	73	73	0.150851	NonUniformIntronCover	1	24.5156	137	136	reps	0.259759	0.366141	0.178223	0.0961668
Chr22	50217827	50217917	TUBGCP6/ENSG00000128159.12/anti-near	0	-	10	0.00407564	0.995924	0.00407564	0.0697674	-	1	12	158	158	0.0127471	NonUniformIntronCover	0.8875	2.15625	167	167	reps	0.0323429	0.153937	0.0194175	0.00546242
Chr2	152615000	152617090	FMNL2/ENSG00000157827.20/clean	0	+	50	0.00409133	0.995909	0.00409133	0.0548992	-	0.940196	6.68015	115	115	0.00381114	-	0.684804	0.96201	179	179	reps	0.0236639	0.0782052	0.00507094	0.00364132
Chr20	18480181	18480401	POLR3F/ENSG00000132664.12/clean	0	+	10	0.00409386	0.00409386	0.995906	0.024692	-	1	5.79762	229	227	0.0842019	-	1	14.619	158	158	reps	0.0206731	0.0272831	0.0829694	0.0862021
Chr4	17823770	17824967	NCAPG/ENSG00000109805.10/clean	0	+	10	0.00409566	0.995904	0.00409566	0.0422596	-	1	23.6947	536	536	0.0143683	-	1	7.52211	514	514	reps	0.040927	0.0453896	0.0137043	0.0114824
Chr3	9987264	9987814	EMC3-AS1/ENSG00000180385.8/anti-over	0	+	10	0.00410194	0.00410194	0.995898	0.0600272	-	1	8.36574	131	99	0.175283	MinorIsoform	1	16.1528	76	56	reps	0.0355658	0.0782182	0.117767	0.264591
Chr17	42666239	42666322	TUBG2/ENSG00000037042.9/anti-near	0	+	10	0.00410575	0.995894	0.00410575	0.100433	-	1	17.1935	154	154	0.0321626	-	1	7.70968	232	232	reps	0.0769488	0.12846	0.0180518	0.0413793
Chr11	78222195	78223411	GAB2/ENSG00000033327.13/anti-near	0	-	10	0.00410662	0.00410662	0.995893	0.102624	NonUniformIntronCover	1	6.86157	60	60	0.352705	-	1	11.9876	22	22	reps	0.209746	0.0507428	0.310163	0.396759
Chr1	92297529	92297960	GLMN/ENSG00000174842.17/clean	0	-	10	0.00410856	0.00410856	0.995891	0	-	0	0	114	114	0.0544105	-	1	5.63905	87	87	reps	0	0	0.0442978	0.0611111
Chr11	294478	294555	PGGHG/ENSG00000142102.16/anti-near	0	+	10	0.00411523	0.995885	0.00411523	0.0343123	NonUniformIntronCover	1	4.37037	123	123	0	-	0	0	254	254	reps	0.0353398	0.03125	0	0
Chr19	40577630	40578153	SHKBP1/ENSG00000160410.15/clean	0	+	146	0.00411656	0.00411656	0.995883	0.0122575	NonUniformIntronCover	1	5.4106	436	422	0.0418331	-	1	15.3245	351	343	reps	0.0196121	0.00302617	0.0402329	0.0470932
Chr17	4891716	4892148	MINK1/ENSG00000141503.17/clean	0	+	10	0.00412309	0.995877	0.00412309	0.0256018	-	1	11.8235	449	444	0.00414345	NonUniformIntronCover	1	1.87647	451	451	reps	0.0200012	0.0412364	0.00460829	0.00162084
Chr6	32192250	32192471	GPSM3/ENSG00000213654.10/clean	0	-	32	0.00412623	0.995874	0.00412623	0.414449	LowCover	1	4.24675	5	5	0.0322581	-	0.746032	1	29	29	reps	0.285714	0.692	0.0666667	0
Chr10	100546581	100547139	HIF1AN/ENSG00000166135.14/clean	0	+	10	0.00417331	0.00417331	0.995827	0.00375236	NonUniformIntronCover	0.872263	1.86818	494	494	0.0233314	-	1	11.8727	490	489	reps	0.00231846	0.00416584	0.01854	0.0250404
Chr12	112229880	112230686	HECTD4/ENSG00000173064.13/clean	0	-	10	0.00418226	0.995818	0.00418226	0.114087	NonUniformIntronCover	1	5.5375	41	41	0.0173913	-	0.859296	2	113	113	reps	0.121976	0.0985915	0.00354684	0.0236557
Chr3	195279428	195285795	ACAP2/ENSG00000114331.15/clean	0	-	1376	0.00418451	0.995815	0.00418451	0.13697	-	1	10.4747	64	63	0.0329188	-	0.996995	4.35704	125	125	reps	0.202985	0.106825	0.0235578	0.0394894
Chr11	6479258	6479971	ARFIP2/ENSG00000132254.12/clean	0	-	109	0.00419091	0.00419091	0.995809	0.067955	-	1	81.9504	1097	1097	0.0987288	-	1	125.099	1111	1111	reps	0.0590187	0.0793186	0.0934803	0.105557
Chr15	42164486	42164995	VPS39/ENSG00000166887.15/clean	0	-	125	0.00419491	0.00419491	0.995805	0.0358011	NonUniformIntronCover	1	6.98052	185	184	0.11774	-	1	15.4805	116	114	reps	0.0345825	0.0395422	0.0709185	0.15155
Chr16	1520047	1520130	IFT140/ENSG00000187535.14/clean	0	-	10	0.00420679	0.995793	0.00420679	0.0546951	-	1	7.29032	126	126	0.00512821	-	1	1	194	194	reps	0.0632911	0.0421866	0.0113636	0
Chr8	22571221	22571717	SORBS3/ENSG00000120896.13/clean	0	+	10	0.00420942	0.995791	0.00420942	0.0633412	-	1	30.5663	452	449	0.0284907	-	1	14.1939	484	484	reps	0.0478759	0.0805354	0.0208087	0.033897
Chr3	132665868	132665983	UBA5/ENSG00000081307.12/anti-over	0	+	10	0.00420947	0.995791	0.00420947	0.184669	-	1	47.7907	182	182	0.0981852	-	1	26.6744	241	241	reps	0.117522	0.243338	0.0840896	0.106886
Chr9	137014404	137014689	ABCA2/ENSG00000107331.17/clean	0	-	10	0.00421496	0.995785	0.00421496	0.0537998	-	1	6.02703	106	106	0.00349619	NonUniformIntronCover	0.698182	0.990991	199	199	reps	0.0563758	0.0472103	0.00834166	0
Chr6	149595234	149597062	KATNA1/ENSG00000186625.14/anti-over	0	-	10	0.00421706	0.00421706	0.995783	0.0454789	NonUniformIntronCover	1	21.25	446	432	0.0990268	-	1	21.7624	198	195	reps	0.053772	0.0364506	0.0707429	0.13911
Chr5	179801467	179801553	MGAT4B/ENSG00000161013.17/anti-near	0	-	10	0.00421886	0.00421886	0.995781	0.0195644	-	1	11.5938	578	578	0.0481776	NonUniformIntronCover	1	28.75	547	547	reps	0.0294492	0.00732601	0.0555121	0.0397112
Chr16	31493524	31493602	C16orf58/ENSG00000140688.17/anti-near	0	-	10	0.00422268	0.00422268	0.995777	0.229416	-	1	71.75	214	214	0.34289	-	1	105.929	192	192	reps	0.280032	0.159182	0.290762	0.406211
Chr3	33409346	33409448	UBP1/ENSG00000153560.12/clean	0	-	10	0.00422358	0.995776	0.00422358	0.0165746	-	1	3	178	178	8.21828e-05	NonUniformIntronCover	0.0434783	0	529	529	reps	0.0121951	0.020202	0.000198491	0.000140233
Chr19	12715169	12715242	TNPO2/ENSG00000105576.15/clean	0	-	10	0.00422636	0.00422636	0.995774	0.120074	-	1	41.0741	301	300	0.198976	-	1	76.2593	307	307	reps	0.17162	0.0781528	0.214983	0.184145
Chr2	219224022	219224105	ATG9A/ENSG00000198925.12/clean	0	-	10	0.00423132	0.995769	0.00423132	0.0280925	NonUniformIntronCover	1	11.6774	404	404	0.00492611	-	1	2	404	404	reps	0.0294496	0.0320675	0.00510204	0.00333159
Chr10	133531734	133532123	CYP2E1/ENSG00000130649.10/clean	0	+	10	0.00423167	0.995768	0.00423167	0.433186	-	1	43.5621	55	53	0.190387	NonUniformIntronCover	1	11.2876	48	47	reps	0.384418	0.471831	0.124464	0.251681
Chr7	100685481	100685973	GIGYF1/ENSG00000146830.10/clean	0	-	10	0.00424376	0.995756	0.00424376	0.0828065	-	1	15.2577	169	162	0.0146032	NonUniformIntronCover	0.684647	2.01546	136	133	reps	0.0324415	0.15894	0.0169119	0.00926826
Chr5	119133385	119133493	DMXL1/ENSG00000172869.14/clean	0	+	10	0.00424437	0.995756	0.00424437	0.361217	-	1	11.875	20	20	0.0961538	-	1	5	45	45	reps	0.158485	0.614767	0	0.147059
Chr3	3151045	3152455	CRBN/ENSG00000113851.14/anti-near	0	-	10	0.00425472	0.995745	0.00425472	0.416034	-	1	34.9089	49	49	0.222568	NonUniformIntronCover	1	36.6446	128	123	reps	0.36633	0.479532	0.18316	0.251151
Chr9	137014810	137014912	ABCA2/ENSG00000107331.17/clean	0	-	10	0.00426763	0.995732	0.00426763	0.0434783	-	1	4	88	88	0	-	0	0	182	182	reps	0.0436714	0.0207557	0	0
Chr7	2371849	2372672	EIF3B/ENSG00000106263.18/clean	0	+	10	0.00426867	0.995731	0.00426867	0.0478837	-	1	44.2569	865	865	0.0281756	-	1	62.6239	2152	2152	reps	0.0546848	0.0389375	0.0349347	0.0234519
Chr7	38752313	38754701	VPS41/ENSG00000006715.16/clean	0	-	10	0.00427621	0.995724	0.00427621	0.10599	NonUniformIntronCover	1	22.0515	186	185	0.0302806	-	1	4.80882	154	154	reps	0.0472954	0.162316	0.00783943	0.0389243
Chr4	6329353	6333561	PPP2R2C/ENSG00000074211.14/clean	0	-	10	0.00428156	0.995718	0.00428156	0.143528	-	1	11.8982	71	64	0.00946857	-	0.592663	0.731548	62	62	reps	0.0604027	0.234179	0.00593203	0.0210781
Chr11	62885608	62888134	SLC3A2/ENSG00000168003.16/clean	0	+	152	0.00428361	0.00428361	0.995716	0.0112045	-	1	35.6147	3143	3098	0.0206838	-	1	36.5811	1732	1713	reps	0.0111638	0.0108695	0.0196632	0.0218647
Chr9	105596657	105601144	FKTN/ENSG00000106692.14/clean	0	+	531	0.00432264	0.00432264	0.995677	0.0410616	-	0.928716	3.21149	75	70	0.167748	MinorIsoform	1	17.9388	89	65	reps	0.0311567	0.0441866	0.143713	0.178338
Chr22	50576637	50576856	CPT1B/ENSG00000205560.13/clean	0	-	10	0.00432554	0.995674	0.00432554	0.675727	MinorIsoform	1	33.3412	16	12	0.375106	-	1	52.2235	87	84	reps	0.64717	0.722222	0.431058	0.321732
Chr1	40996068	40997393	CTPS1/ENSG00000171793.16/clean	0	+	10	0.00433083	0.995669	0.00433083	0.0348232	-	1	31.0285	859	856	0.0162793	NonUniformIntronCover	1	19.6433	1187	1185	reps	0.0333064	0.0371265	0.0249788	0.0102584
Chr2	96549805	96550187	ARID5A/ENSG00000196843.17/clean	0	+	10	0.0043321	0.0043321	0.995668	0.22025	NonUniformIntronCover	1	44.3467	157	137	0.382479	-	1	46.4533	75	71	reps	0.210218	0.231754	0.321896	0.427966
Chr11	66814015	66816052	C11orf80/ENSG00000173715.17/clean	0	+	10	0.00433275	0.995667	0.00433275	0.255607	-	1	32.2774	85	85	0.0984108	NonUniformIntronCover	1	9.60543	88	88	reps	0.285814	0.225145	0.109525	0.088636
Chr14	20996711	20996784	METTL17/ENSG00000165792.17/known-exon+anti-near+anti-over	0	+	10	0.00435522	0.00435522	0.995645	0.401728	-	1	304.852	454	384	0.498721	-	1	281.556	283	259	reps	0.471597	0.3131	0.51804	0.478012
Chr19	45146049	45146389	PPP1R37/ENSG00000104866.11/anti-near	0	+	10	0.00435992	0.99564	0.00435992	0.197283	-	1	27.2803	111	111	0.0767501	-	1	9.31061	112	111	reps	0.112212	0.348837	0.0784447	0.0681818
Chr22	50466258	50466349	SBF1/ENSG00000100241.21/clean	0	-	10	0.00436113	0.995639	0.00436113	0.0943303	-	1	34.7879	330	330	0.0497428	-	1	28.4242	539	539	reps	0.0767343	0.111937	0.0631342	0.0333664
Chr19	1109598	1109682	SBNO2/ENSG00000064932.16/anti-near	0	-	10	0.00436715	0.00436715	0.995633	0.0185185	-	1	3	153	153	0.0857605	-	1	10.6	110	110	reps	0.0227273	0.0135135	0.0769231	0.094533
Chr9	132900837	132901588	TSC1/ENSG00000165699.15/clean	0	-	10	0.00436799	0.995632	0.00436799	0.162696	-	1	19.431	100	91	0.0574923	-	1	8.3569	137	135	reps	0.140653	0.176988	0.134588	0.0289992
Chr20	2751987	2752085	EBF4/ENSG00000088881.21/clean	0	+	10	0.00437437	0.00437437	0.995626	0.153807	NonUniformIntronCover	1	8.36111	46	46	0.389831	-	1	37.0556	58	57	reps	0.140811	0.163539	0.273644	0.488525
Chr8	66847348	66850830	C8orf44-SGK3/ENSG00000288602.1/clean	0	+	10	0.00438355	0.995616	0.00438355	0.0605941	-	0.925691	2.6446	41	41	0.00264412	-	0.336694	0.183453	127	127	reps	0.0274865	0.0836843	0.00540563	0.00118224
Chr19	48137688	48139970	LIG1/ENSG00000105486.14/clean	0	-	81	0.00439471	0.995605	0.00439471	0.230612	NonUniformIntronCover	0.984098	63.5437	185	185	0.149524	-	0.981826	81.9285	440	439	reps	0.203557	0.290591	0.182687	0.112283
Chr2	200882435	200885697	PPIL3/ENSG00000240344.9/clean	0	-	126	0.00440267	0.995597	0.00440267	0.0920079	MinorIsoform	1	21.9889	77	70	0.0350816	-	1	10.7253	244	225	reps	0.0867115	0.0862102	0.0421119	0.0329412
Chr12	50081364	50081544	ASIC1/ENSG00000110881.12/clean	0	+	10	0.00440405	0.00440405	0.995596	0.0556479	NonUniformIntronCover	1	8.36765	142	142	0.146133	-	1	23.6176	138	138	reps	0.0678778	0.0463513	0.1495	0.138005
Chr6	33685827	33686052	ITPR3/ENSG00000096433.11/clean	0	+	10	0.00440626	0.995594	0.00440626	0.134813	-	1	24.931	160	160	0.0530612	-	1	9.41379	168	167	reps	0.130676	0.140316	0.030829	0.0772216
Chr11	800451	800542	PIDD1/ENSG00000177595.18/clean	0	-	10	0.0044224	0.0044224	0.995578	0.0187354	-	1	8	417	417	0.0542529	-	1	21.4545	372	372	reps	0.0223441	0.0100811	0.0517241	0.0574713
Chr11	46369550	46369940	DGKZ/ENSG00000149091.15/clean	0	+	10	0.00442651	0.00442651	0.995573	0.00629273	NonUniformIntronCover	1	4.56579	721	693	0.0241088	-	1	17.0461	690	680	reps	0.0067624	0.00629476	0.03958	0.0074181
Chr19	41433434	41433536	DMAC2/ENSG00000105341.18/clean	0	-	10	0.00442896	0.995571	0.00442896	0.0491467	-	1	20.1579	317	317	0.0154242	NonUniformIntronCover	1	6	311	311	reps	0.0585252	0.0327531	0.0153846	0.0154639
Chr2	111825167	111825776	ANAPC1/ENSG00000153107.13/clean	0	-	90	0.0044369	0.995563	0.0044369	0.0278495	NonUniformIntronCover	1	6.76077	229	229	0.00331508	-	0.915222	1.16746	344	344	reps	0.0282984	0.029522	0.00245228	0.00285395
Chr12	57764550	57764753	CYP27B1/ENSG00000111012.10/anti-near	0	-	10	0.00443949	0.995561	0.00443949	0.482815	-	1	14.9367	16	15	0.202791	-	1	23.9114	94	93	reps	0.695861	0.352016	0.246423	0.159918
Chr17	75231979	75232850	NUP85/ENSG00000125450.11/anti-near	0	+	147	0.00444045	0.00444045	0.99556	0.010507	NonUniformIntronCover	1	5.61724	529	525	0.0348191	-	1	20.7793	576	576	reps	0.00865705	0.014	0.0338118	0.0338272
Chr17	7894265	7894414	CHD3/ENSG00000170004.17/clean	0	+	10	0.00447132	0.00447132	0.995529	0.000284839	-	0.057554	0	202	197	0.0334928	NonUniformIntronCover	1	7	202	199	reps	0	0.000746896	0.0215054	0.0431034
Chr17	80087776	80088010	CCDC40/ENSG00000141519.15/clean	0	+	10	0.00448523	0.995515	0.00448523	0.463576	-	1	7.77778	9	9	0.0248756	NonUniformIntronCover	0.357143	0.144444	14	14	reps	1	0.218901	0.0132159	0
Chr8	102257717	102258984	UBR5/ENSG00000104517.13/anti-near	0	-	114	0.00451384	0.995486	0.00451384	0.105084	NonUniformIntronCover	1	35.8143	305	282	0.0509926	-	1	18.9676	353	335	reps	0.075574	0.131809	0.0366179	0.060493
Chr17	42565805	42565905	COASY/ENSG00000068120.15/clean	0	+	10	0.00451424	0.00451424	0.995486	0.0168927	NonUniformIntronCover	1	12.3889	721	718	0.0395099	-	1	24.7222	601	600	reps	0.0193133	0.0134939	0.0288347	0.0560758
Chr6	170567009	170569611	TBP/ENSG00000112592.14/clean	0	+	300	0.00451541	0.00451541	0.995485	0.0316584	NonUniformIntronCover	1	9.80803	282	279	0.0832993	-	1	22.808	240	238	reps	0.032651	0.0317867	0.0481014	0.110544
Chr5	58457379	58457487	PLK2/ENSG00000145632.15/clean	0	-	10	0.00451764	0.00451764	0.995482	0.00568182	-	1	1	175	175	0.057377	-	1	7	115	115	reps	0	0.00769231	0.0714286	0.0454545
Chr21	36035960	36036084	SETD4/ENSG00000185917.13/known-exon	0	-	10	0.00452072	0.995479	0.00452072	0.402096	-	1	20.8478	31	31	0.167313	NonUniformIntronCover	1	14.0652	69	69	reps	0.416336	0.387211	0.161534	0.168797
Chr8	33548867	33549409	RNF122/ENSG00000133874.2/clean	0	-	10	0.00452266	0.995477	0.00452266	0.0764153	-	0.853383	2.81308	34	32	0.00930788	NonUniformIntronCover	0.981203	2.65888	283	282	reps	0.0526316	0.110418	0.00325123	0.0134228
Chr16	67952037	67952183	SLC12A4/ENSG00000124067.17/clean	0	-	10	0.00452633	0.995474	0.00452633	0.108672	-	1	7.07143	57	57	0.02	-	1	3	147	147	reps	0.0555556	0.174447	0.0277778	0.0128205
Chr1	154344785	154344970	ATP8B2/ENSG00000143515.18/clean	0	+	10	0.0045267	0.995473	0.0045267	0.198233	-	1	24.9718	101	96	0.088765	-	1	18.6056	191	191	reps	0.216308	0.165713	0.126666	0.059428
Chr19	4442341	4442924	CHAF1A/ENSG00000167670.16/anti-near	0	+	10	0.00453531	0.995465	0.00453531	0.179782	-	1	104.991	479	456	0.115809	-	1	50.1645	383	374	reps	0.158019	0.217221	0.157536	0.0551169
Chr5	134788591	134790469	DDX46/ENSG00000145833.16/clean	0	+	196	0.00454572	0.995454	0.00454572	0.0792875	-	1	45.3828	516	491	0.0415513	NonUniformIntronCover	1	25.0579	577	554	reps	0.0572323	0.0918737	0.028101	0.0532346
Chr11	799565	799814	PIDD1/ENSG00000177595.18/clean	0	-	10	0.00454941	0.00454941	0.995451	0.102517	-	1	67.0515	587	587	0.156293	-	1	89.2887	481	481	reps	0.0988338	0.114057	0.15541	0.158775
Chr19	43596743	43597093	SRRM5/ENSG00000226763.5/known-exon+anti-near	0	+	10	0.00455117	0.995449	0.00455117	0.147066	-	1	22.2426	119	104	0.0466126	-	1	6.55147	123	104	reps	0.125714	0.182774	0.0607312	0.0222222
Chr16	671203	671696	RHOT2/ENSG00000140983.14/clean	0	+	10	0.00455933	0.995441	0.00455933	0.0366114	-	1	41.841	1101	1094	0.0191727	NonUniformIntronCover	1	26.5846	1360	1353	reps	0.0356317	0.0371419	0.0223207	0.0137426
Chr8	42179063	42179925	PLAT/ENSG00000104368.18/clean	0	-	10	0.00455933	0.995441	0.00455933	0.119215	NonUniformIntronCover	1	9.33918	69	69	0.0270107	-	0.978873	4.7193	170	170	reps	0.083724	0.156202	0.0465885	0.0154828
Chr9	129006123	129006238	NUP188/ENSG00000095319.14/anti-near	0	+	10	0.00456338	0.995437	0.00456338	0.0192753	-	1	14.7209	745	745	0.00225734	NonUniformIntronCover	0.742857	1	442	442	reps	0.0247423	0.0147394	0.00271932	0.000426257
Chr3	127669202	127671433	PODXL2/ENSG00000114631.11/clean	0	+	10	0.00456821	0.00456821	0.995432	0.0120096	NonUniformIntronCover	0.994597	10.3566	852	852	0.0315719	-	0.987393	20.4409	627	618	reps	0.0124256	0.00946681	0.0270862	0.0356013
ChrX	154402841	154402941	DNASE1L1/ENSG00000013563.14/anti-over	0	-	24	0.00456885	0.00456885	0.995431	0.0694669	-	1	24.1875	320	320	0.140907	-	1	29.0312	177	177	reps	0.0784227	0.0575342	0.173809	0.101124
Chr1	3631117	3631465	WRAP73/ENSG00000116213.16/known-exon+anti-near	0	-	10	0.00457232	0.00457232	0.995428	0.363386	-	1	188.368	326	325	0.481376	-	1	155.934	168	168	reps	0.355535	0.361842	0.492633	0.476493
Chr3	184357856	184357961	CLCN2/ENSG00000114859.16/clean	0	-	10	0.00458595	0.995414	0.00458595	0.256356	-	1	6.20513	15	15	0.0238095	-	0.705263	1	36	36	reps	0.277778	0.194215	0.030303	0
ChrX	19371064	19371344	MAP3K15/ENSG00000180815.14/clean	0	-	10	0.00460563	0.995394	0.00460563	0.16129	NonUniformIntronCover	1	5	26	26	0.00295421	-	0.133333	0	45	45	reps	0.140584	0.173278	0.00881057	0
Chr10	68754827	68755369	CCAR1/ENSG00000060339.14/clean	0	+	134	0.00460812	0.995392	0.00460812	0.0197371	NonUniformIntronCover	1	10.7317	527	522	0.00433898	-	0.990196	3.05488	676	675	reps	0.0253655	0.0142804	0.00393701	0.00467372
Chr16	67288014	67288166	PLEKHG4/ENSG00000196155.13/anti-near	0	+	10	0.00461214	0.995388	0.00461214	0.331504	-	1	10.4138	21	19	0.114747	NonUniformIntronCover	1	18.0172	139	130	reps	0.219231	0.495025	0.141351	0.0833333
Chr11	6611452	6611663	TAF10/ENSG00000166337.10/anti-near	0	-	10	0.00461442	0.00461442	0.995386	0.0373549	-	1	55.5679	1432	1415	0.0577581	-	1	107.395	1752	1734	reps	0.0323436	0.0461653	0.0611612	0.0522182
Chr17	28615246	28615663	KIAA0100/ENSG00000007202.15/anti-over	0	-	10	0.00461709	0.995383	0.00461709	0.0552463	-	1	22.1043	378	358	0.0228247	-	1	14.6687	628	620	reps	0.0465742	0.0687327	0.024024	0.0216319
Chr11	45869817	45870052	CRY2/ENSG00000121671.12/clean	0	+	10	0.00462022	0.99538	0.00462022	0.11029	MinorIsoform	1	10.1648	57	57	0	-	0	0	58	58	reps	0.0802274	0.151631	0	0
Chr6	75259490	75260823	TMEM30A/ENSG00000112697.17/clean	0	-	301	0.0046212	0.995379	0.0046212	0.0388428	-	0.92345	3.15217	77	77	0.00418895	NonUniformIntronCover	0.998062	2.60386	615	615	reps	0.0147971	0.0528201	0.00840585	0.00162025
Chr6	44233006	44233416	SLC29A1/ENSG00000112759.19/clean	0	+	10	0.00462716	0.995373	0.00462716	0.021548	-	1	10.725	487	480	0.00418483	NonUniformIntronCover	1	2.69375	641	637	reps	0.0226341	0.017341	0.00757508	0.000592869
Chr16	1345890	1345985	BAIAP3/ENSG00000007516.14/anti-near	0	+	10	0.00462963	0.99537	0.00462963	0.285714	LowCover	0.894118	2	5	5	0.00767178	-	0.270588	0	34	34	reps	0.0422535	0.666667	0.0220518	0
Chr11	72230019	72230120	INPPL1/ENSG00000165458.14/clean	0	+	10	0.00463144	0.995369	0.00463144	0.0519376	-	1	24.3784	442	431	0.0226222	NonUniformIntronCover	1	17.7297	766	744	reps	0.0546075	0.0472103	0.0238693	0.0224704
Chr1	2514089	2514353	PANK4/ENSG00000157881.16/clean	0	-	10	0.00464262	0.00464262	0.995357	0.00596194	-	1	3.05882	509	509	0.0313248	-	1	8.34314	258	258	reps	0.00735216	0.00421941	0.0358883	0.0298507
Chr6	78969917	78970048	PHIP/ENSG00000146247.14/clean	0	-	10	0.00465059	0.995349	0.00465059	0.0796813	NonUniformIntronCover	1	8.57143	99	93	0.0127831	-	1	1.87755	145	145	reps	0.0949868	0.0655738	0.0160602	0.00943396
Chr1	11964300	11964643	PLOD1/ENSG00000083444.17/clean	0	+	10	0.0046552	0.995345	0.0046552	0.015776	NonUniformIntronCover	1	8.7037	458	458	0.00172414	-	0.978979	1	559	559	reps	0.00779878	0.0316701	0.003003	0.00088674
Chr17	75110379	75110462	ARMC7/ENSG00000125449.7/clean	0	+	10	0.00466061	0.995339	0.00466061	0.119922	-	1	15.8065	115	115	0.0417626	-	1	8.19355	188	188	reps	0.135664	0.0838359	0.0199821	0.0681818
ChrX	47214637	47214793	UBA1/ENSG00000130985.17/clean	0	+	10	0.00468317	0.995317	0.00468317	0.0278794	-	1	137.2	4732	4732	0.0198862	-	1	108.55	5302	5302	reps	0.026444	0.0297369	0.0262884	0.0155658
Chr4	124667514	124668983	ANKRD50/ENSG00000151458.12/clean	0	-	10	0.0046867	0.995313	0.0046867	0.135569	-	1	8.62564	55	55	0.0314414	-	0.999315	3.34359	103	103	reps	0.122939	0.144659	0.0270078	0.0235861
Chr22	31105128	31105207	SELENOM/ENSG00000198832.10/anti-near	0	-	10	0.00468806	0.995312	0.00468806	0.0439095	-	1	62.1379	1353	1353	0.024689	NonUniformIntronCover	1	30.6552	1211	1210	reps	0.0493343	0.0366451	0.0191331	0.032848
Chr1	156335888	156338153	CCT3/ENSG00000163468.15/anti-over	0	-	551	0.00468814	0.995312	0.00468814	0.0214362	-	1	61.6866	2816	2740	0.0134551	-	1	55.4956	4069	4054	reps	0.0165523	0.0259628	0.0107952	0.0153625
Chr14	20995951	20996208	METTL17/ENSG00000165792.17/known-exon+anti-near+anti-over	0	+	10	0.00470233	0.00470233	0.995298	0.122711	-	1	124.909	893	893	0.169825	-	1	129.899	635	635	reps	0.112356	0.138014	0.162882	0.1764
Chr17	28341326	28341403	TNFAIP1/ENSG00000109079.10/clean	0	+	10	0.00470439	0.995296	0.00470439	0.0294993	-	1	8.81481	290	290	0	-	0	0	212	212	reps	0.034398	0.0285132	0	0
Chr15	74800505	74800680	CSK/ENSG00000103653.16/clean	0	+	10	0.0047045	0.995296	0.0047045	0.0572186	-	1	34.7761	572	570	0.029232	-	1	24.0597	797	795	reps	0.0565602	0.0637017	0.0323071	0.0246819
Chr16	3026916	3027010	THOC6/ENSG00000131652.14/anti-near	0	+	10	0.00470903	0.995291	0.00470903	0.0287097	-	1	23.7353	803	803	0.0114302	NonUniformIntronCover	1	9.41176	814	814	reps	0.0155612	0.0459881	0.00929312	0.0144057
Chr12	57179556	57179781	LRP1/ENSG00000123384.14/clean	0	+	10	0.00473003	0.99527	0.00473003	0.111111	-	1	3	24	24	0.00826446	-	0.934884	1	120	120	reps	0.148041	0.0727049	0	0.0131579
Chr16	1507716	1509829	TELO2/ENSG00000100726.15/anti-near	0	+	10	0.00474589	0.995254	0.00474589	0.0573741	-	1	45.7106	751	730	0.0318277	-	1	33.5314	1020	1002	reps	0.0488066	0.0738837	0.0331766	0.0292822
Chr1	1637004	1637080	CDK11B/ENSG00000248333.8/anti-near	0	-	10	0.00475856	0.995241	0.00475856	0.0404582	-	1	15.6429	370	370	0.0147599	NonUniformIntronCover	1	8.46429	560	560	reps	0.0375325	0.0433505	0.0228853	0.00687285
Chr19	50378439	50378521	NR1H2/ENSG00000131408.15/clean	0	+	10	0.00475944	0.00475944	0.995241	0.0599108	-	1	18.8	245	245	0.141179	-	1	19.2333	113	113	reps	0.0576477	0.0617608	0.174791	0.0731707
Chr14	24103255	24103509	PCK2/ENSG00000100889.12/anti-over	0	+	10	0.00476196	0.00476196	0.995238	0.0334728	-	1	8	220	218	0.0949371	MinorIsoform	1	17.6224	128	126	reps	0.0325824	0.0396311	0.0624779	0.126434
Chr9	137242021	137242495	TUBB4B/ENSG00000188229.6/anti-near	0	+	10	0.00476258	0.995237	0.00476258	0.0175634	-	1	283.5	15848	15801	0.0136878	-	1	170.78	12294	12263	reps	0.0170015	0.0183777	0.0140446	0.012689
ChrX	154461638	154462127	PLXNA3/ENSG00000130827.6/clean	0	+	10	0.00477166	0.00477166	0.995228	0.264015	-	1	27.6218	77	76	0.491356	-	1	48.3005	50	47	reps	0.303045	0.198005	0.424519	0.577434
Chr11	134153363	134157017	NCAPD3/ENSG00000151503.13/anti-near	0	-	696	0.00478511	0.00478511	0.995215	0.0357278	NonUniformIntronCover	1	23.1943	622	620	0.0688727	-	1	39.8682	539	536	reps	0.0275829	0.0489296	0.0541262	0.0858589
Chr9	92612614	92613018	CENPP/ENSG00000188312.14/anti-near	0	+	10	0.0047898	0.99521	0.0047898	0.0477147	-	1	4.81013	91	91	0.000979261	-	0.142132	0	145	145	reps	0.0363636	0.0599142	0.00208582	0
Chr19	49364754	49365508	DKKL1/ENSG00000104901.7/anti-near	0	+	10	0.00479585	0.995204	0.00479585	0.564327	LowCover	0.694892	2.5906	2	2	0.0341246	-	0.494624	0.486577	14	12	reps	0.646081	0.286673	0	0.0761589
Chr15	101646899	101650003	TM2D3/ENSG00000184277.13/clean	0	-	127	0.00480149	0.00480149	0.995199	0.00218196	-	0.915351	2.38791	1091	1091	0.0107819	NonUniformIntronCover	1	7.52057	690	682	reps	0.00171534	0.00170828	0.00798362	0.0123807
Chr5	56923833	56923914	MIER3/ENSG00000155545.19/anti-over	0	-	10	0.00480724	0.00480724	0.995193	0.0857416	-	1	12.3793	132	129	0.195013	-	1	28.5862	109	109	reps	0.0384615	0.109837	0.216773	0.183673
ChrX	153694267	153694343	SLC6A8/ENSG00000130821.16/known-exon	0	+	10	0.00480946	0.00480946	0.995191	0.0284444	NonUniformIntronCover	1	21.9286	731	731	0.0559365	-	1	38.75	635	635	reps	0.0340524	0.0226593	0.0630072	0.0467378
Chr17	7221058	7221537	ACADVL/ENSG00000072778.20/anti-near	0	+	29	0.00484474	0.00484474	0.995155	0.0671303	NonUniformIntronCover	1	56.6333	786	770	0.112979	-	1	48.4	366	362	reps	0.0645087	0.0608886	0.100554	0.123377
Chr17	28399713	28400609	SLC46A1/ENSG00000076351.13/known-exon+anti-near+anti-over	0	-	10	0.00486174	0.995138	0.00486174	0.311535	-	1	24.4354	54	54	0.126445	NonUniformIntronCover	1	12.014	83	75	reps	0.258805	0.397008	0.125137	0.119925
Chr17	732769	733097	TLCD3A/ENSG00000167695.15/known-exon	0	+	10	0.0048883	0.995112	0.0048883	0.469529	-	1	123.031	138	138	0.317255	-	1	65.0547	140	140	reps	0.416246	0.541432	0.382622	0.225849
Chr17	43810915	43811111	MPP3/ENSG00000161647.18/clean	0	-	10	0.00489084	0.995109	0.00489084	0.0470829	-	1	4.84211	98	98	0.00291737	-	0.430108	0.328947	147	146	reps	0.00695074	0.088729	0	0.00521785
Chr8	38267391	38267896	PLPP5/ENSG00000147535.17/anti-over	0	-	151	0.00489361	0.00489361	0.995106	0.170064	-	1	33.6056	164	159	0.307915	NonUniformIntronCover	1	42.7113	96	86	reps	0.167616	0.164789	0.244011	0.365194
Chr19	1880115	1881234	ABHD17A/ENSG00000129968.15/anti-near	0	-	173	0.0049012	0.995099	0.0049012	0.0247311	-	1	18.5368	731	723	0.00906577	NonUniformIntronCover	1	9.54211	1041	1033	reps	0.018153	0.0312769	0.00870691	0.00771674
Chr11	14830846	14831639	PDE3B/ENSG00000152270.9/clean	0	+	10	0.00490969	0.99509	0.00490969	0.0633199	-	1	3.44762	48	48	0.000255363	-	0.0383142	0	149	149	reps	0.04741	0.029379	0.000651177	0.000379204
Chr2	219608430	219608582	STK11IP/ENSG00000144589.22/clean	0	+	10	0.00491605	0.995084	0.00491605	0.182001	-	1	14.0172	63	62	0.038494	-	1	2.36207	59	59	reps	0.211421	0.130378	0.0544732	0
Chr11	119092163	119092403	HMBS/ENSG00000256269.10/known-exon+anti-near	0	+	10	0.00491624	0.995084	0.00491624	0.250837	-	1	35.8261	107	85	0.131185	-	1	27.7826	183	176	reps	0.255794	0.239479	0.12149	0.142398
Chr15	69421752	69421991	KIF23/ENSG00000137807.15/clean	0	+	10	0.00491713	0.995083	0.00491713	0.093391	-	1	39.2473	381	292	0.0450971	-	1	17.9462	380	370	reps	0.077823	0.106404	0.0323631	0.0570948
Chr8	94866191	94867139	INTS8/ENSG00000164941.14/clean	0	+	62	0.00492786	0.995072	0.00492786	0.116608	NonUniformIntronCover	1	16.632	117	116	0.0462836	-	1	11.4045	235	230	reps	0.0793004	0.176382	0.0272762	0.0653532
Chr16	88737646	88737727	PIEZO1/ENSG00000103335.22/known-exon+anti-near+anti-over	0	-	10	0.00495	0.99505	0.00495	0.263865	-	1	127.966	357	353	0.180968	-	1	69.3793	313	313	reps	0.260918	0.267481	0.23709	0.111828
Chr6	32978005	32978125	BRD2/ENSG00000204256.13/clean	0	+	10	0.00495323	0.00495323	0.995047	0.0116414	-	1	54.2045	4602	4601	0.0184446	-	1	71.0682	3782	3777	reps	0.0150526	0.00855629	0.015953	0.0246324
Chr11	67395825	67395911	RAD9A/ENSG00000172613.8/anti-near	0	+	10	0.00497691	0.00497691	0.995023	0.00755124	-	1	2.625	345	313	0.0402968	-	1	12.2188	284	273	reps	0.00497512	0.00918215	0.0449438	0.036239
Chr19	19355391	19355707	MAU2/ENSG00000129933.21/clean	0	+	10	0.00498596	0.995014	0.00498596	0.0292955	-	1	5.85484	194	194	0.0038055	NonUniformIntronCover	0.977124	1.30645	341	341	reps	0.00787402	0.0629029	0.00636943	0.00226137
Chr7	33014831	33015669	NT5C3A/ENSG00000122643.22/clean	0	-	10	0.00499548	0.995005	0.00499548	0.155814	-	1	68.2922	370	287	0.0834404	-	1	21.1205	232	229	reps	0.195247	0.12803	0.0980165	0.0658453
Chr11	46778313	46778459	CKAP5/ENSG00000175216.15/clean	0	-	10	0.00499569	0.00499569	0.995004	0.00232919	NonUniformIntronCover	0.875	3	1284	1283	0.0100475	-	1	14.6964	1438	1438	reps	0.00178571	0.00274348	0.015856	0.0057101
Chr1	9731390	9731760	CLSTN1/ENSG00000171603.18/anti-near	0	-	10	0.00500147	0.00500147	0.994999	0.0187072	NonUniformIntronCover	1	25.7361	1335	1335	0.0370025	-	1	33.0833	859	859	reps	0.0204264	0.0167667	0.0497438	0.0237871
Chr7	101315282	101316339	IFT22/ENSG00000128581.17/anti-near	0	-	10	0.00500739	0.994993	0.00500739	0.0802247	-	1	13.2578	152	152	0.0216314	NonUniformIntronCover	1	4.35561	197	196	reps	0.0633298	0.0651495	0.0243543	0.0224354
Chr10	101791088	101791353	OGA/ENSG00000198408.14/known-exon	0	-	10	0.00500781	0.994992	0.00500781	0.111977	-	1	52.4563	413	409	0.0595533	-	1	24	379	374	reps	0.122994	0.104048	0.0568505	0.0617706
Chr12	131714240	131714821	SFSWAP/ENSG00000061936.9/clean	0	+	10	0.00502976	0.00502976	0.99497	0.0176727	-	1	5.25328	254	252	0.0592815	NonUniformIntronCover	1	15.0611	213	212	reps	0.00918785	0.0314439	0.0358539	0.0878424
Chr6	33080534	33080671	HLA-DPB1/ENSG00000223865.11/known-exon+anti-near+anti-over	0	+	10	0.00503406	0.994966	0.00503406	0.365186	MinorIsoform	1	37.3922	49	41	0.181058	-	1	21.6667	86	80	reps	0.37551	0.367366	0.212963	0.14
Chr4	145110444	145110967	ABCE1/ENSG00000164163.11/anti-over	0	+	140	0.0050351	0.994965	0.0050351	0.011167	-	1	6.47097	573	564	0.00074999	-	0.490862	0.477419	654	648	reps	0.0136828	0.00975118	0.00167249	0
Chr3	49840373	49840984	TRAIP/ENSG00000183763.9/clean	0	-	10	0.00503514	0.994965	0.00503514	0.195408	MinorIsoform	1	23.8008	98	41	0.0826243	-	1	12.249	136	111	reps	0.204775	0.178846	0.0809925	0.0848279
ChrX	41344128	41344238	DDX3X/ENSG00000215301.10/clean	0	+	10	0.00504163	0.00504163	0.994958	0.00761196	-	1	20.825	2709	2708	0.014936	-	1	43.85	2892	2889	reps	0.0101765	0.00604728	0.0186659	0.0115457
Chr7	100684337	100684449	GIGYF1/ENSG00000146830.10/clean	0	-	10	0.0050616	0.0050616	0.994938	0.0581586	NonUniformIntronCover	1	15.1905	246	245	0.125918	-	1	34.2857	237	237	reps	0.0485024	0.0636943	0.161074	0.0820116
Chr1	2521315	2521717	PANK4/ENSG00000157881.16/known-exon	0	-	10	0.00507234	0.00507234	0.994928	0.0312079	-	1	14.3671	446	445	0.0728238	-	1	22.2278	283	280	reps	0.015196	0.0422251	0.0578244	0.0840756
Chr17	39995068	39995175	PSMD3/ENSG00000108344.15/clean	0	+	10	0.00507517	0.994925	0.00507517	0.0246664	-	1	40.6667	1608	1584	0.0131847	-	1	24.4103	1827	1820	reps	0.0230882	0.0270472	0.0113956	0.0158378
Chr1	154344500	154344640	ATP8B2/ENSG00000143515.18/clean	0	+	10	0.00508731	0.994913	0.00508731	0.0726705	-	1	6.26923	80	80	0.00828757	NonUniformIntronCover	0.861538	1.59615	191	191	reps	0.0833333	0.0734141	0.00943396	0.00622222
Chr1	1293933	1294089	ACAP3/ENSG00000131584.19/anti-near	0	-	10	0.00508932	0.994911	0.00508932	0.150213	-	1	47.55	265	265	0.0806397	-	1	24.0333	270	270	reps	0.152476	0.14519	0.108776	0.0350877
Chr16	67945871	67945950	SLC12A4/ENSG00000124067.17/clean	0	-	10	0.00509385	0.994906	0.00509385	0.209644	-	1	13.7931	46	46	0.0792732	-	1	13.6897	159	159	reps	0.260958	0.150759	0.0941039	0.0683205
Chr17	42818415	42818543	BECN1/ENSG00000126581.13/clean	0	-	10	0.00509977	0.9949	0.00509977	0.0255761	-	1	12.625	481	431	0.00471698	NonUniformIntronCover	1	2	422	396	reps	0.0148418	0.0354801	0.00507614	0.00440529
Chr16	1207430	1207769	CACNA1H/ENSG00000196557.13/anti-near	0	+	10	0.00510159	0.994898	0.00510159	0.0385782	NonUniformIntronCover	0.726444	7.74436	163	163	0.00263664	-	0.629179	0.819549	224	224	reps	0.0417867	0.0327696	0.00590063	0
Chr10	90894891	90895453	RPP30/ENSG00000148688.13/clean	0	+	10	0.00510367	0.994896	0.00510367	0.103899	-	1	80.2342	692	670	0.0639453	NonUniformIntronCover	1	43.7207	640	624	reps	0.0922695	0.114875	0.0503218	0.0771072
Chr2	71427414	71428546	ZNF638/ENSG00000075292.19/clean	0	+	10	0.00511223	0.994888	0.00511223	0.0346146	-	1	17.7844	474	456	0.0102409	NonUniformIntronCover	1	5.53556	535	508	reps	0.031076	0.0352461	0.00987929	0.00947125
Chr1	3463672	3466147	ARHGEF16/ENSG00000130762.15/clean	0	+	153	0.00511331	0.994887	0.00511331	0.137073	NonUniformIntronCover	0.981912	10.4839	66	63	0.00728679	-	0.499139	0.695699	68	68	reps	0.108277	0.157411	0.0109494	0.00942295
Chr2	27242427	27242619	CAD/ENSG00000084774.14/clean	0	+	10	0.00512216	0.994878	0.00512216	0.0125117	-	1	7.91892	587	587	0.00132979	NonUniformIntronCover	0.758242	1	743	743	reps	0.0120363	0.0131579	0.00314465	0
Chr3	14133809	14134769	TMEM43/ENSG00000170876.8/clean	0	+	10	0.00512895	0.994871	0.00512895	0.0744049	NonUniformIntronCover	1	24.1158	300	298	0.0297248	-	1	10.9368	357	357	reps	0.0670395	0.0805739	0.025437	0.0315023
Chr11	65294652	65295539	POLA2/ENSG00000014138.9/clean	0	+	10	0.00514235	0.00514235	0.994858	0.00605339	-	1	3.36182	552	549	0.0219385	NonUniformIntronCover	1	22.6325	995	990	reps	0.00146071	0.0123889	0.0288651	0.0146859
Chr7	33015870	33017438	NT5C3A/ENSG00000122643.22/clean	0	-	245	0.00517086	0.994829	0.00517086	0.114256	-	1	45.7928	272	272	0.0552548	NonUniformIntronCover	1	16.6102	279	279	reps	0.13893	0.0950797	0.0499609	0.0556388
Chr11	118496367	118497935	KMT2A/ENSG00000118058.23/clean	0	+	10	0.00518341	0.994817	0.00518341	0.156204	MinorIsoform	1	18.6971	101	75	0.0588025	-	1	8.43429	135	133	reps	0.160654	0.161944	0.0655885	0.0508383
Chr18	215504	216485	THOC1/ENSG00000079134.12/anti-near	0	-	10	0.0051904	0.99481	0.0051904	0.142415	-	1	71.7404	432	427	0.0826941	NonUniformIntronCover	1	29.2082	323	323	reps	0.117914	0.172064	0.0671141	0.0899261
Chr16	30354058	30354183	CD2BP2/ENSG00000169217.9/clean	0	-	10	0.00519041	0.99481	0.00519041	0.0512814	-	1	44.7021	824	809	0.0265715	-	1	22.5745	823	823	reps	0.0462334	0.0569579	0.021904	0.0368353
Chr8	19361314	19364071	SH2D4A/ENSG00000104611.12/clean	0	+	10	0.00519378	0.994806	0.00519378	0.117857	-	1	11.7571	88	75	0.0226572	NonUniformIntronCover	0.878777	2.57325	111	109	reps	0.0924663	0.146117	0.0179963	0.027338
Chr7	100577154	100577272	LRCH4/ENSG00000077454.16/clean	0	-	10	0.00520916	0.00520916	0.994791	0.204665	-	1	47.8636	186	164	0.337555	-	1	54.5227	107	97	reps	0.186532	0.234043	0.309237	0.428218
Chr19	40622667	40622949	LTBP4/ENSG00000090006.18/clean	0	+	10	0.00522921	0.994771	0.00522921	0.0689875	-	0.863971	3.92727	53	45	0.00362857	MinorIsoform	0.386029	0.227273	106	69	reps	0.0874439	0.0167194	0.00651104	0.00469598
Chr10	14851323	14852369	HSPA14/ENSG00000187522.16/clean	0	+	10	0.00523458	0.994765	0.00523458	0.0840095	-	1	31.7332	318	316	0.0278784	NonUniformIntronCover	1	5.73558	199	199	reps	0.0813102	0.0825516	0.0325277	0.0268283
Chr2	112646129	112646562	SLC20A1/ENSG00000144136.11/anti-near	0	+	10	0.00524029	0.00524029	0.99476	0.00817295	NonUniformIntronCover	1	6.52632	792	788	0.027558	-	1	11.5906	409	406	reps	0.00742291	0.00768924	0.0357909	0.0103933
Chr1	52358758	52359026	CC2D1B/ENSG00000154222.14/clean	0	-	10	0.00524639	0.00524639	0.994754	0.00877634	NonUniformIntronCover	1	3.01923	341	339	0.0431093	-	1	10.4519	232	231	reps	0.00975383	0.00729927	0.0689493	0.0165879
Chr17	47157124	47157229	CDC27/ENSG00000004897.12/clean	0	-	10	0.00524909	0.00524909	0.994751	0.0413027	-	1	8.48718	182	182	0.0999163	-	1	36.7436	310	310	reps	0.0369092	0.0451977	0.100706	0.0990584
Chr4	48851975	48857212	OCIAD1/ENSG00000109180.14/anti-over	0	+	539	0.00525041	0.99475	0.00525041	0.0511626	-	1	41.5734	771	751	0.0287038	NonUniformIntronCover	0.987867	33.9553	1149	1112	reps	0.0406427	0.0635175	0.0318219	0.0265854
Chr2	128170390	128171204	UGGT1/ENSG00000136731.13/clean	0	+	10	0.00525052	0.994749	0.00525052	0.0594395	-	1	6.69876	106	106	0.00938018	-	0.681592	1.93168	204	204	reps	0.0192308	0.0925395	0.00598081	0.008
Chr3	50275615	50275704	SEMA3B/ENSG00000012171.20/clean	0	+	10	0.00525411	0.994746	0.00525411	0.428571	LowCover	1	3	4	4	0	-	0	0	19	19	reps	0.333333	0.5	0	0
ChrX	19354583	19355348	PDHA1/ENSG00000131828.14/anti-near	0	+	41	0.0052616	0.994738	0.0052616	0.0411552	-	1	52.1069	1198	1194	0.0235923	-	1	34.1414	1393	1393	reps	0.0404133	0.0410601	0.0183183	0.0293066
Chr2	101277281	101281858	RNF149/ENSG00000163162.9/clean	0	-	10	0.00526785	0.00526785	0.994732	0.0167383	-	1	6.21346	339	339	0.0515697	-	1	14.6809	257	256	reps	0.0154899	0.0167024	0.0378336	0.0611953
Chr11	62617347	62620496	B3GAT3/ENSG00000149541.10/anti-near	0	-	180	0.00527177	0.00527177	0.994728	0.0285342	NonUniformIntronCover	1	40.0345	1363	1355	0.0504663	-	0.992253	41.1901	764	758	reps	0.0269771	0.0303694	0.0482967	0.0488042
Chr6	43449026	43449106	ABCC10/ENSG00000124574.15/anti-near	0	+	10	0.00528115	0.994719	0.00528115	0.161992	-	1	27.6429	123	123	0.0517928	-	1	5.57143	95	94	reps	0.164802	0.1596	0.0485437	0.0487805
Chr12	70342168	70342257	CNOT2/ENSG00000111596.13/clean	0	+	10	0.0053139	0.994686	0.0053139	0.0139665	-	1	5	353	352	0	-	0	0	497	497	reps	0.00558659	0.0223464	0	0
Chr16	19542064	19542620	CCP110/ENSG00000103540.16/clean	0	+	12	0.00533136	0.994669	0.00533136	0.0960241	-	1	10.8349	102	96	0.0286738	NonUniformIntronCover	1	6.16972	209	204	reps	0.0889872	0.0991736	0.0331982	0.0158331
Chr1	227734816	227735011	JMJD4/ENSG00000081692.12/anti-over	0	-	26	0.00533368	0.994666	0.00533368	0.163103	NonUniformIntronCover	1	50.087	257	257	0.0989619	-	1	56.7826	516	516	reps	0.134008	0.23751	0.08347	0.128868
Chr10	102732218	102732858	SFXN2/ENSG00000156398.13/clean	0	+	10	0.00533733	0.994663	0.00533733	0.187573	-	1	27.9365	112	112	0.0983649	NonUniformIntronCover	1	35.0198	314	314	reps	0.14344	0.262948	0.0816788	0.108592
Chr3	15411437	15414020	METTL6/ENSG00000206562.11/clean	0	-	297	0.00533897	0.00533897	0.994661	0.0314293	NonUniformIntronCover	0.985127	4.57533	141	136	0.122193	-	1	14.1987	102	96	reps	0.0378618	0.0209736	0.0881876	0.14539
Chr14	92134170	92134249	CPSF2/ENSG00000165934.13/clean	0	+	10	0.00534001	0.99466	0.00534001	0.0289294	NonUniformIntronCover	1	4.37931	145	145	0	-	0	0	275	275	reps	0.0327869	0.0255823	0	0
Chr22	50266305	50266539	MAPK11/ENSG00000185386.15/clean	0	-	10	0.0053466	0.994653	0.0053466	0.569511	-	1	41.0111	31	31	0.293438	-	1	22.0111	53	53	reps	0.631232	0.455561	0.260366	0.309235
Chr19	10141189	10142027	DNMT1/ENSG00000130816.16/clean	0	-	10	0.00535776	0.00535776	0.994642	0.0644453	-	1	85.6235	1243	1230	0.095785	-	1	86.3343	815	802	reps	0.0712138	0.0544818	0.0881276	0.105025
Chr17	76725855	76726346	JMJD6/ENSG00000070495.14/anti-near	0	-	10	0.00536318	0.994637	0.00536318	0.0621918	-	1	26.7254	403	402	0.0197628	NonUniformIntronCover	1	5	248	248	reps	0.0608508	0.0638426	0.0225573	0.0133333
Chr5	889165	889586	BRD9/ENSG00000028310.18/clean	0	-	10	0.0053768	0.994623	0.0053768	0.0530967	-	1	12.6727	216	216	0.0180462	NonUniformIntronCover	1	7.38788	394	394	reps	0.0537997	0.0607023	0.021796	0.00936805
Chr16	29799184	29799263	KIF22/ENSG00000079616.13/clean	0	+	10	0.00538729	0.00538729	0.994613	0.0035648	NonUniformIntronCover	1	4.10345	1147	1147	0.01443	-	1	10	683	683	reps	0.00170068	0.00551133	0.0155047	0.0142606
Chr17	7907031	7907125	CHD3/ENSG00000170004.17/clean	0	+	10	0.00540677	0.00540677	0.994593	0.00351091	-	0.785714	1.35294	382	382	0.0231639	NonUniformIntronCover	1	7.58824	320	319	reps	0.00416667	0.00302857	0.0179283	0.0331126
Chr21	26840061	26840275	ADAMTS1/ENSG00000154734.15/clean	0	-	10	0.00541783	0.00541783	0.994582	0.0487537	NonUniformIntronCover	1	3.79268	74	74	0.17028	-	1	57.4634	280	279	reps	0.0622267	0.047619	0.132997	0.22948
Chr17	7043073	7043311	SLC16A11/ENSG00000174326.14/anti-near	0	-	10	0.00541817	0.00541817	0.994582	0.270117	-	1	7.77174	21	19	0.767677	NonUniformIntronCover	1	19.8261	6	5	reps	0.206897	0.671429	0.742537	0.781818
Chr14	56290456	56296599	PELI2/ENSG00000139946.10/clean	0	+	10	0.00542708	0.00542708	0.994573	0.0209777	NonUniformIntronCover	0.75803	1.13564	53	53	0.157793	-	1	14.0517	75	72	reps	0.0192794	0.0181964	0.098727	0.206458
Chr19	17274024	17274106	BABAM1/ENSG00000105393.16/anti-over	0	+	10	0.00543051	0.994569	0.00543051	0.0439856	-	1	19.6	426	351	0.0180451	-	1	12	653	608	reps	0.0301559	0.063346	0.0111421	0.0261438
Chr19	13956018	13956122	DCAF15/ENSG00000132017.10/clean	0	+	10	0.00544019	0.99456	0.00544019	0.0667124	-	1	30.7368	430	429	0.0267062	-	1	9	328	328	reps	0.0424254	0.100653	0.0303407	0.0179641
Chr16	85665128	85665975	GSE1/ENSG00000131149.19/clean	0	+	10	0.00544124	0.994559	0.00544124	0.128437	-	1	40.9672	258	258	0.0667463	NonUniformIntronCover	1	24.5313	340	339	reps	0.146314	0.115068	0.0642646	0.0668143
Chr19	9617171	9618090	ZNF561/ENSG00000171469.11/clean	0	-	223	0.00545133	0.00545133	0.994549	0.0199555	-	0.757184	1.56786	60	59	0.134847	MinorIsoform	1	14.8071	72	60	reps	0.011163	0.0260524	0.0620051	0.222654
Chr5	58458171	58458398	PLK2/ENSG00000145632.15/clean	0	-	10	0.00545894	0.00545894	0.994541	0.000579151	-	0.0967742	0	166	166	0.0405628	-	1	3.67816	87	87	reps	0	0.000786164	0.00583902	0.0890052
ChrX	153960161	153960234	HCFC1/ENSG00000172534.14/clean	0	-	10	0.00546168	0.994538	0.00546168	0.123349	-	1	28.7037	203	203	0.0620155	NonUniformIntronCover	1	24	359	359	reps	0.134184	0.109696	0.0808511	0.0446547
ChrX	154462310	154463390	PLXNA3/ENSG00000130827.6/clean	0	+	10	0.00546346	0.00546346	0.994537	0.188203	-	1	23.6472	102	101	0.381152	NonUniformIntronCover	1	31.4112	49	49	reps	0.18056	0.185857	0.337711	0.484736
Chr3	184357698	184357778	CLCN2/ENSG00000114859.16/clean	0	-	10	0.00549738	0.994503	0.00549738	0.393333	-	1	8.42857	13	13	0.0625	-	1	2	30	30	reps	0.329787	0.53719	0.0833333	0
Chr16	67657853	67657985	ACD/ENSG00000102977.17/anti-near	0	-	10	0.00551067	0.994489	0.00551067	0.0924855	-	1	16	156	156	0.0307913	NonUniformIntronCover	1	7.72	241	241	reps	0.0990991	0.0806452	0.0538698	0.0104948
Chr17	38716981	38717431	MLLT6/ENSG00000275023.5/anti-over	0	+	18	0.00551146	0.994489	0.00551146	0.0408676	-	1	9.16092	188	188	0.00440529	NonUniformIntronCover	0.8125	1	224	224	reps	0.0427697	0.0398385	0.00557424	0.00307074
Chr9	128632323	128632430	SPTAN1/ENSG00000197694.18/anti-near	0	+	10	0.00553531	0.994465	0.00553531	0.031865	-	1	34	1033	1033	0.0129098	-	1	9.74359	745	744	reps	0.0285551	0.0347868	0.0243902	0.00149729
Chr8	25460300	25460383	CDCA2/ENSG00000184661.14/known-exon	0	+	10	0.00554758	0.00554758	0.994452	0.0730236	-	1	18.3548	219	218	0.146169	-	1	34.5806	202	202	reps	0.0384615	0.100371	0.136364	0.156194
Chr5	465272	465717	EXOC3/ENSG00000180104.16/anti-near	0	+	10	0.00556222	0.994438	0.00556222	0.0313768	-	1	20.1486	599	599	0.0089656	NonUniformIntronCover	1	4.73143	510	510	reps	0.0270246	0.0383377	0.00419997	0.0148237
Chr8	144412666	144412758	SLC39A4/ENSG00000147804.10/clean	0	-	10	0.00556697	0.994433	0.00556697	0.261464	-	1	66.9118	189	185	0.172022	-	1	84.5588	407	403	reps	0.190038	0.389222	0.171849	0.176231
Chr1	33493615	33494217	ZSCAN20/ENSG00000121903.14/clean	0	+	10	0.00557209	0.994428	0.00557209	0.202469	-	1	4.82353	17	17	0	-	0	0	33	33	reps	0.229417	0.178838	0	0
Chr11	6615329	6615441	TPP1/ENSG00000166340.17/anti-near	0	-	10	0.00558089	0.994419	0.00558089	0.0377941	-	1	13.119	334	331	0.00758542	NonUniformIntronCover	1	2.69048	352	352	reps	0.0362319	0.041271	0.00272207	0.0125568
Chr17	44092806	44093091	HDAC5/ENSG00000108840.15/clean	0	-	10	0.00560312	0.994397	0.00560312	0.0926011	-	1	18.0631	175	172	0.0291806	-	1	6.52252	214	214	reps	0.0661752	0.121544	0.0344628	0.0279906
[truncated: 9,635 more rows]
