# Supplementary material for: Systematic identification and characterization of exon–intron circRNAs
Source: Genome Res. 2024 Mar;34(3):376–93. doi: 10.1101/gr.278590.123 (PMC11067877; doi:10.1101/gr.278590.123)
Supplement: Supplement 9 [file Supplemental_Table_S9.xlsx]

## Sheet: Table S9A. SH_SY5Y_EIciRNAs
Supplemental Table S9A: Expression of EIciRNAs during SH-SY5Y differentiation
chr	circ_start	circ_end	intron_start	intron_end	strand	#BSJ	sample
Chr1	1256991	1257310	1257130	1257207	-	1	D6_rep1
Chr1	1256991	1257310	1257130	1257207	-	1	D6_rep2
Chr1	1256991	1257310	1257130	1257207	-	2	D3_rep1
Chr1	1256991	1257310	1257130	1257207	-	4	D3_rep2
Chr1	1669663	1670151	1669736	1670097	-	1	D0_rep1
Chr1	1669663	1670151	1669736	1670097	-	1	D0_rep2
Chr1	1669663	1670151	1669736	1670097	-	4	D6_rep1
Chr1	1669663	1670151	1669736	1670097	-	10	D6_rep2
Chr1	9931890	9934860	9932898	9934761	-	2	D6_rep1
Chr1	9931890	9934860	9932898	9934761	-	5	D6_rep2
Chr1	10347760	10348733	10347827	10348648	+	4	D6_rep1
Chr1	10347760	10348733	10347827	10348648	+	16	D6_rep2
Chr1	10365099	10365648	10365245	10365408	+	1	D6_rep1
Chr1	10365099	10365648	10365245	10365408	+	1	D6_rep2
Chr1	11073933	11074326	11074008	11074230	-	3	D6_rep1
Chr1	11073933	11074326	11074008	11074230	-	12	D6_rep2
Chr1	12578717	12579412	12578956	12579292	-	1	D6_rep1
Chr1	12578717	12579412	12578956	12579292	-	3	D6_rep2
Chr1	12578717	12580666	12579412	12580522	-	1	D6_rep1
Chr1	12578717	12580666	12579412	12580522	-	2	D6_rep2
Chr1	16201781	16202574	16201861	16202415	-	6	D0_rep1
Chr1	16201781	16202574	16201861	16202415	-	7	D0_rep2
Chr1	16201781	16202574	16201861	16202415	-	7	D3_rep1
Chr1	16201781	16202574	16201861	16202415	-	12	D6_rep1
Chr1	16201781	16202574	16201861	16202415	-	21	D3_rep2
Chr1	16201781	16202574	16201861	16202415	-	21	D6_rep2
Chr1	16490617	16490926	16490783	16490864	-	1	D6_rep1
Chr1	16490617	16490926	16490783	16490864	-	1	D6_rep2
Chr1	20749722	20773610	20749882	20757165	-	1	D3_rep1
Chr1	20749722	20773610	20749882	20757165	-	1	D6_rep1
Chr1	20749722	20773610	20771073	20773450	-	2	D3_rep2
Chr1	20749722	20773610	20749882	20757165	-	3	D0_rep1
Chr1	20749722	20773610	20771073	20773450	-	6	D0_rep2
Chr1	20749722	20773610	20771073	20773450	-	8	D6_rep2
Chr1	20757165	20773610	20757256	20765376	-	1	D0_rep1
Chr1	20757165	20773610	20771073	20773450	-	2	D0_rep2
Chr1	20757165	20773610	20771073	20773450	-	2	D3_rep2
Chr1	20757165	20773610	20771073	20773450	-	3	D3_rep1
Chr1	20757165	20773610	20771073	20773450	-	3	D6_rep1
Chr1	20757165	20773610	20771073	20773450	-	3	D6_rep2
Chr1	20770929	20773610	20771073	20773450	-	3	D6_rep1
Chr1	20770929	20773610	20771073	20773450	-	3	D6_rep2
Chr1	26941456	26941818	26941660	26941752	+	1	D0_rep2
Chr1	26941456	26941818	26941660	26941752	+	4	D0_rep1
Chr1	26942659	26943065	26942776	26942870	+	1	D0_rep1
Chr1	26942659	26943065	26942776	26942870	+	6	D0_rep2
Chr1	28490950	28493091	28491012	28491649	+	1	D0_rep1
Chr1	28490950	28493091	28491012	28491649	+	2	D0_rep2
Chr1	28560632	28561398	28560732	28561345	+	1	D3_rep1
Chr1	28560632	28561398	28561260	28561345	+	1	D3_rep2
Chr1	32226170	32226530	32226320	32226402	+	2	D6_rep2
Chr1	32226170	32226530	32226320	32226402	+	4	D6_rep1
Chr1	32326938	32327677	32327077	32327535	+	2	D6_rep1
Chr1	32326938	32327677	32327077	32327535	+	3	D6_rep2
Chr1	33294936	33295305	33295015	33295146	+	16	D3_rep1
Chr1	33294936	33295305	33295015	33295146	+	22	D0_rep1
Chr1	33294936	33295305	33295015	33295146	+	28	D3_rep2
Chr1	33294936	33295305	33295015	33295146	+	36	D0_rep2
Chr1	33294936	33295305	33295015	33295146	+	69	D6_rep1
Chr1	33294936	33295305	33295015	33295146	+	71	D6_rep2
Chr1	35358924	35361789	35359446	35361193	+	3	D6_rep2
Chr1	35358924	35361789	35361255	35361618	+	6	D6_rep1
Chr1	37984168	37984779	37984260	37984706	-	1	D0_rep1
Chr1	37984168	37984779	37984260	37984706	-	4	D0_rep2
Chr1	48451551	48453131	48451600	48452993	-	3	D3_rep1
Chr1	48451551	48453131	48451600	48452993	-	18	D3_rep2
Chr1	51772069	51772723	51772182	51772604	+	3	D6_rep1
Chr1	51772069	51772723	51772182	51772604	+	17	D6_rep2
Chr1	53233541	53235635	53233652	53235576	-	6	D6_rep1
Chr1	53233541	53235635	53233652	53235576	-	8	D6_rep2
Chr1	91375357	91385834	91375446	91375526	-	2	D3_rep1
Chr1	91375357	91385834	91375446	91375526	-	2	D6_rep2
Chr1	91375357	91385834	91375446	91375526	-	3	D3_rep2
Chr1	91375357	91385834	91375446	91375526	-	3	D6_rep1
Chr1	145974824	145975436	145974991	145975306	+	6	D6_rep1
Chr1	145974824	145975436	145974991	145975306	+	10	D6_rep2
Chr1	151166933	151167414	151167218	151167325	+	1	D6_rep1
Chr1	151166933	151167414	151167218	151167325	+	2	D6_rep2
Chr1	151224247	151227400	151224279	151227319	+	2	D3_rep1
Chr1	151224247	151227400	151224279	151227319	+	3	D6_rep1
Chr1	151224247	151227400	151224279	151227319	+	6	D3_rep2
Chr1	151224247	151227400	151224279	151227319	+	13	D6_rep2
Chr1	155676547	155679512	155679313	155679408	-	1	D3_rep1
Chr1	155676547	155679512	155676746	155679408	-	3	D3_rep2
Chr1	155725381	155726019	155725490	155725926	+	1	D6_rep1
Chr1	155725381	155726019	155725490	155725926	+	5	D6_rep2
Chr1	155725381	155726019	155725490	155725926	+	6	D3_rep1
Chr1	155725381	155726019	155725490	155725926	+	7	D3_rep2
Chr1	155725381	155726019	155725490	155725926	+	10	D0_rep1
Chr1	155725381	155726019	155725490	155725926	+	24	D0_rep2
Chr1	155926675	155927156	155926839	155927103	-	3	D0_rep1
Chr1	155926675	155927156	155926839	155927103	-	8	D3_rep1
Chr1	155926675	155927156	155926839	155927103	-	8	D6_rep1
Chr1	155926675	155927156	155926839	155927103	-	9	D3_rep2
Chr1	155926675	155927156	155926839	155927103	-	11	D0_rep2
Chr1	155926675	155927156	155926839	155927103	-	33	D6_rep2
Chr1	163161914	163168368	163161976	163168257	-	2	D3_rep1
Chr1	163161914	163168368	163161976	163168257	-	3	D3_rep2
Chr1	179063926	179064496	179064098	179064304	+	5	D6_rep2
Chr1	179063926	179064496	179064098	179064304	+	8	D3_rep1
Chr1	179063926	179064496	179064098	179064304	+	8	D6_rep1
Chr1	179063926	179064496	179064098	179064304	+	13	D3_rep2
Chr1	180984676	180993425	180988345	180989983	-	1	D6_rep2
Chr1	180984676	180993425	180984771	180988238	-	3	D6_rep1
Chr1	224411426	224413335	224411565	224413252	-	2	D0_rep1
Chr1	224411426	224413335	224411565	224413252	-	3	D0_rep2
Chr1	224952669	224974153	224967583	224968758	+	2	D6_rep1
Chr1	224952669	224974153	224967583	224968758	+	3	D6_rep2
Chr1	233208517	233218184	233217931	233218030	-	2	D0_rep1
Chr1	233208517	233218184	233217931	233218030	-	2	D0_rep2
Chr1	233217898	233227371	233217931	233218030	-	1	D6_rep1
Chr1	233217898	233227371	233217931	233218030	-	4	D3_rep1
Chr1	233217898	233227371	233217931	233218030	-	6	D3_rep2
Chr1	233217898	233227371	233217931	233218030	-	7	D6_rep2
Chr1	235341707	235342883	235342346	235342835	+	7	D6_rep1
Chr1	235341707	235342883	235342346	235342835	+	7	D6_rep2
Chr1	236178413	236180028	236178636	236179878	+	4	D6_rep1
Chr1	236178413	236180028	236178636	236179878	+	5	D6_rep2
Chr1	236178413	236183906	236178636	236179878	+	1	D6_rep1
Chr1	236178413	236183906	236178636	236179878	+	2	D6_rep2
Chr1	244845246	244848856	244847101	244848787	-	3	D0_rep1
Chr1	244845246	244848856	244846706	244847001	-	4	D0_rep2
Chr1	246556572	246557534	246556721	246557380	-	1	D6_rep1
Chr1	246556572	246557534	246556721	246557380	-	2	D6_rep2
Chr1	247308474	247310456	247308588	247309698	-	1	D6_rep2
Chr1	247308474	247310456	247308588	247309698	-	4	D6_rep1
Chr10	7243557	7285954	7284150	7285865	-	5	D6_rep2
Chr10	7243557	7285954	7284150	7285865	-	8	D6_rep1
Chr10	7276891	7285954	7284150	7285865	-	2	D0_rep2
Chr10	7276891	7285954	7284150	7285865	-	2	D3_rep2
Chr10	7276891	7285954	7284150	7285865	-	3	D6_rep2
Chr10	7276891	7285954	7284150	7285865	-	8	D3_rep1
Chr10	7276891	7285954	7284150	7285865	-	9	D0_rep1
Chr10	7276891	7285954	7284150	7285865	-	20	D6_rep1
Chr10	7283903	7285954	7284150	7285865	-	1	D6_rep2
Chr10	7283903	7285954	7284150	7285865	-	4	D6_rep1
Chr10	12084539	12087729	12084751	12087534	+	1	D6_rep1
Chr10	12084539	12087729	12084751	12087534	+	2	D6_rep2
Chr10	21681331	21682257	21681376	21682224	+	2	D3_rep1
Chr10	21681331	21682257	21681376	21682224	+	5	D3_rep2
Chr10	31839304	31839711	31839319	31839636	-	1	D3_rep1
Chr10	31839304	31839711	31839319	31839636	-	2	D3_rep2
Chr10	43113555	43114736	43113675	43114479	+	3	D3_rep1
Chr10	43113555	43114736	43113675	43114479	+	3	D3_rep2
Chr10	68394074	68394451	68394136	68394327	-	2	D3_rep1
Chr10	68394074	68394451	68394136	68394327	-	4	D6_rep1
Chr10	68394074	68394451	68394136	68394327	-	6	D3_rep2
Chr10	68394074	68394451	68394136	68394327	-	11	D6_rep2
Chr10	73571420	73576361	73575675	73576135	-	4	D6_rep1
Chr10	73571420	73576361	73575675	73576135	-	4	D6_rep2
Chr10	73575511	73576361	73575675	73576135	-	2	D0_rep1
Chr10	73575511	73576361	73575675	73576135	-	2	D0_rep2
Chr10	92637183	92639900	92637309	92637386	+	2	D6_rep1
Chr10	92637183	92639900	92637309	92637386	+	8	D6_rep2
Chr10	97437190	97437750	97437275	97437699	-	5	D3_rep2
Chr10	97437190	97437750	97437275	97437699	-	9	D6_rep1
Chr10	97437190	97437750	97437275	97437699	-	12	D3_rep1
Chr10	97437190	97437750	97437275	97437699	-	13	D0_rep1
Chr10	97437190	97437750	97437275	97437699	-	13	D6_rep2
Chr10	97437190	97437750	97437275	97437699	-	28	D0_rep2
Chr10	97743093	97744915	97743164	97744728	+	3	D3_rep1
Chr10	97743093	97744915	97743164	97744728	+	3	D6_rep1
Chr10	97743093	97744915	97743164	97744728	+	5	D3_rep2
Chr10	97743093	97744915	97743164	97744728	+	24	D6_rep2
Chr10	101798841	101800400	101799455	101800241	-	1	D6_rep1
Chr10	101798841	101800400	101799455	101800241	-	1	D6_rep2
Chr10	101806044	101807901	101806143	101807729	-	1	D6_rep1
Chr10	101806044	101807901	101806143	101807729	-	2	D6_rep2
Chr10	102143044	102145090	102144307	102145019	+	1	D6_rep1
Chr10	102143044	102145090	102144307	102145019	+	2	D6_rep2
Chr10	102157018	102158214	102157074	102157185	+	3	D0_rep1
Chr10	102157018	102158214	102157074	102157185	+	3	D0_rep2
Chr10	102358038	102359435	102358729	102359269	+	1	D0_rep1
Chr10	102358038	102359435	102358729	102359269	+	2	D0_rep2
Chr10	103438014	103438808	103438071	103438685	+	17	D3_rep1
Chr10	103438014	103438808	103438071	103438685	+	18	D6_rep1
Chr10	103438014	103438808	103438071	103438685	+	31	D0_rep1
Chr10	103438014	103438808	103438071	103438685	+	38	D3_rep2
Chr10	103438014	103438808	103438071	103438685	+	68	D0_rep2
Chr10	103438014	103438808	103438071	103438685	+	100	D6_rep2
Chr10	103439745	103440850	103440581	103440733	+	2	D6_rep1
Chr10	103439745	103440850	103440581	103440733	+	5	D0_rep1
Chr10	103439745	103440850	103440581	103440733	+	6	D6_rep2
Chr10	103439745	103440850	103440581	103440733	+	22	D0_rep2
Chr10	110596397	110598290	110596550	110598138	+	3	D6_rep2
Chr10	110596397	110598290	110596550	110598138	+	4	D6_rep1
Chr10	110596397	110598290	110596550	110598138	+	12	D3_rep2
Chr10	110596397	110598290	110596550	110598138	+	13	D3_rep1
Chr10	131973033	131973943	131973118	131973792	-	1	D0_rep1
Chr10	131973033	131973943	131973118	131973792	-	1	D6_rep1
Chr10	131973033	131973943	131973118	131973792	-	2	D0_rep2
Chr10	131973033	131973943	131973118	131973792	-	3	D6_rep2
Chr11	581491	582081	581606	581961	+	2	D3_rep1
Chr11	581491	582081	581606	581961	+	11	D0_rep1
Chr11	581491	582081	581606	581961	+	14	D0_rep2
Chr11	581491	582081	581606	581961	+	16	D6_rep2
Chr11	581491	582081	581606	581961	+	18	D6_rep1
Chr11	581491	582081	581606	581961	+	25	D3_rep2
Chr11	1000431	1003804	1000598	1003721	+	1	D3_rep2
Chr11	1000431	1003804	1000598	1003721	+	2	D0_rep2
Chr11	1000431	1003804	1000598	1003721	+	2	D3_rep1
Chr11	1000431	1003804	1000598	1003721	+	3	D0_rep1
Chr11	8126658	8140193	8138347	8139966	-	2	D6_rep1
Chr11	8126658	8140193	8138347	8139966	-	2	D6_rep2
Chr11	8137377	8140193	8138347	8139966	-	5	D3_rep2
Chr11	8137377	8140193	8138347	8139966	-	8	D3_rep1
Chr11	8137377	8140193	8138347	8139966	-	9	D6_rep1
Chr11	8137377	8140193	8138347	8139966	-	42	D6_rep2
Chr11	9807999	9809002	9808185	9808900	-	1	D3_rep2
Chr11	9807999	9809002	9808185	9808900	-	3	D3_rep1
Chr11	12862249	12864900	12862314	12864837	+	2	D0_rep1
Chr11	12862249	12864900	12862314	12864837	+	4	D0_rep2
Chr11	20082591	20083179	20082600	20083006	+	4	D6_rep2
Chr11	20082591	20083179	20082600	20083006	+	11	D6_rep1
Chr11	34071725	34076642	34076474	34076559	+	1	D6_rep1
Chr11	34071725	34076642	34076474	34076559	+	7	D6_rep2
Chr11	34076235	34076642	34076474	34076559	+	1	D0_rep1
Chr11	34076235	34076642	34076474	34076559	+	1	D6_rep2
Chr11	34076235	34076642	34076474	34076559	+	2	D0_rep2
Chr11	34076235	34076642	34076474	34076559	+	2	D6_rep1
Chr11	46433473	46435037	46433628	46434848	-	2	D6_rep1
Chr11	46433473	46435037	46433628	46434848	-	5	D6_rep2
Chr11	47295495	47296055	47295579	47295896	+	3	D6_rep1
Chr11	47295495	47296055	47295579	47295896	+	3	D6_rep2
Chr11	47411925	47412467	47412039	47412345	+	1	D0_rep1
Chr11	47411925	47412467	47412039	47412345	+	1	D0_rep2
Chr11	47625673	47627127	47625741	47627079	-	3	D3_rep2
Chr11	47625673	47627127	47625741	47627079	-	5	D3_rep1
Chr11	47625673	47627127	47625741	47627079	-	6	D6_rep2
Chr11	47625673	47627127	47625741	47627079	-	7	D6_rep1
Chr11	61366044	61367998	61366216	61367922	+	5	D0_rep1
Chr11	61366044	61367998	61366216	61367922	+	23	D0_rep2
Chr11	61366044	61367998	61366216	61367922	+	26	D3_rep1
Chr11	61366044	61367998	61366216	61367922	+	26	D3_rep2
Chr11	61366044	61367998	61366216	61367922	+	27	D6_rep1
Chr11	61366044	61367998	61366216	61367922	+	50	D6_rep2
Chr11	63651935	63652575	63651986	63652470	-	1	D3_rep2
Chr11	63651935	63652575	63651986	63652470	-	1	D6_rep1
Chr11	63651935	63652575	63651986	63652470	-	2	D3_rep1
Chr11	63651935	63652575	63651986	63652470	-	16	D6_rep2
Chr11	66238803	66239277	66238846	66239141	+	1	D3_rep1
Chr11	66238803	66239277	66238846	66239141	+	2	D3_rep2
Chr11	66238803	66239277	66238846	66239141	+	2	D6_rep1
Chr11	66238803	66239277	66238846	66239141	+	2	D6_rep2
Chr11	70419745	70420510	70419856	70420399	+	2	D0_rep2
Chr11	70419745	70420510	70419856	70420399	+	3	D0_rep1
Chr11	74203727	74204445	74203821	74204352	+	3	D6_rep1
Chr11	74203727	74204445	74203821	74204352	+	11	D3_rep1
Chr11	74203727	74204445	74203821	74204352	+	13	D3_rep2
Chr11	74203727	74204445	74203821	74204352	+	16	D6_rep2
Chr11	77624962	77625818	77625070	77625716	-	2	D3_rep1
Chr11	77624962	77625818	77625070	77625716	-	6	D0_rep1
Chr11	77624962	77625818	77625070	77625716	-	9	D3_rep2
Chr11	77624962	77625818	77625070	77625716	-	10	D6_rep1
Chr11	77624962	77625818	77625070	77625716	-	17	D0_rep2
Chr11	77624962	77625818	77625070	77625716	-	44	D6_rep2
Chr11	93788000	93790793	93788167	93790573	+	1	D6_rep1
Chr11	93788000	93790793	93788167	93790573	+	1	D6_rep2
Chr11	120406117	120407823	120406141	120407737	+	2	D3_rep2
Chr11	120406117	120407823	120406141	120407737	+	3	D3_rep1
Chr11	126272968	126273454	126273079	126273315	+	1	D6_rep1
Chr11	126272968	126273454	126273079	126273315	+	2	D3_rep2
Chr11	126272968	126273454	126273079	126273335	+	4	D3_rep1
Chr11	126272968	126273454	126273079	126273335	+	7	D6_rep2
Chr11	129093620	129124894	129123929	129124802	-	3	D6_rep1
Chr11	129093620	129124894	129123929	129124802	-	7	D6_rep2
Chr11	129123445	129124894	129123929	129124802	-	4	D3_rep2
Chr11	129123445	129124894	129123929	129124802	-	5	D0_rep1
Chr11	129123445	129124894	129123929	129124802	-	7	D3_rep1
Chr11	129123445	129124894	129123929	129124802	-	12	D0_rep2
Chr11	129123445	129124894	129123929	129124802	-	12	D6_rep2
Chr11	129123445	129124894	129123929	129124802	-	14	D6_rep1
Chr12	929763	930144	929886	930050	-	1	D0_rep1
Chr12	929763	930144	929886	930050	-	3	D0_rep2
Chr12	6749847	6750766	6750305	6750712	-	2	D6_rep1
Chr12	6749847	6750766	6750007	6750176	-	4	D6_rep2
Chr12	28225794	28259442	28255662	28257201	+	1	D0_rep1
Chr12	28225794	28259442	28255662	28257201	+	1	D3_rep2
Chr12	28225794	28259442	28255662	28257201	+	4	D3_rep1
Chr12	28225794	28259442	28255662	28257201	+	9	D6_rep1
Chr12	28225794	28259442	28255662	28257201	+	17	D0_rep2
Chr12	28225794	28259442	28255662	28257201	+	22	D6_rep2
Chr12	28255580	28259442	28255662	28257201	+	5	D0_rep1
Chr12	28255580	28259442	28255662	28257201	+	5	D6_rep1
Chr12	28255580	28259442	28255662	28257201	+	10	D3_rep1
Chr12	28255580	28259442	28255662	28257201	+	15	D3_rep2
Chr12	28255580	28259442	28255662	28257201	+	32	D6_rep2
Chr12	28255580	28259442	28255662	28257201	+	36	D0_rep2
Chr12	42210354	42210680	42210454	42210547	-	11	D0_rep1
Chr12	42210354	42210680	42210454	42210547	-	32	D3_rep1
Chr12	42210354	42210680	42210454	42210547	-	37	D3_rep2
Chr12	42210354	42210680	42210454	42210547	-	60	D6_rep1
Chr12	42210354	42210680	42210454	42210547	-	65	D0_rep2
Chr12	42210354	42210680	42210454	42210547	-	69	D6_rep2
Chr12	49097565	49098105	49097739	49097943	-	3	D3_rep1
Chr12	49097565	49098105	49097739	49097943	-	3	D3_rep2
Chr12	49097565	49098105	49097739	49097943	-	12	D6_rep1
Chr12	49097565	49098105	49097739	49097943	-	16	D6_rep2
Chr12	49328926	49329454	49329055	49329160	+	1	D0_rep1
Chr12	49328926	49329454	49329055	49329160	+	3	D0_rep2
Chr12	56285915	56286645	56286023	56286594	-	2	D0_rep1
Chr12	56285915	56286645	56286023	56286594	-	3	D0_rep2
Chr12	57572060	57572726	57572267	57572579	+	1	D6_rep2
Chr12	57572060	57572726	57572267	57572579	+	2	D6_rep1
Chr12	69800208	69801721	69800337	69801608	+	2	D0_rep1
Chr12	69800208	69801721	69800337	69801608	+	8	D6_rep1
Chr12	69800208	69801721	69800337	69801608	+	13	D0_rep2
Chr12	69800208	69801721	69800337	69801608	+	19	D6_rep2
Chr12	106999550	107000082	106999862	106999941	-	1	D0_rep1
Chr12	106999550	107000082	106999862	106999941	-	1	D0_rep2
Chr12	106999550	107000082	106999862	106999941	-	1	D6_rep1
Chr12	106999550	107000082	106999862	106999941	-	1	D6_rep2
Chr12	106999550	107000082	106999862	106999941	-	2	D3_rep1
Chr12	106999550	107000082	106999862	106999941	-	3	D3_rep2
Chr12	108652271	108654410	108652417	108653037	-	2	D3_rep1
Chr12	108652271	108654410	108652417	108653037	-	2	D6_rep1
Chr12	108652271	108654410	108653060	108654305	-	4	D3_rep2
Chr12	108652271	108654410	108652417	108653037	-	7	D6_rep2
Chr12	109258267	109259108	109258364	109258972	+	6	D6_rep1
Chr12	109258267	109259108	109258364	109258972	+	6	D6_rep2
Chr12	109907525	109908937	109908698	109908870	+	1	D6_rep2
Chr12	109907525	109908937	109908698	109908870	+	2	D6_rep1
Chr12	111552279	111555919	111554217	111555882	-	1	D6_rep1
Chr12	111552279	111555919	111554217	111555882	-	4	D6_rep2
Chr12	111554157	111555919	111554217	111555882	-	12	D0_rep1
Chr12	111554157	111555919	111554217	111555882	-	16	D3_rep1
Chr12	111554157	111555919	111554217	111555882	-	39	D6_rep1
Chr12	111554157	111555919	111554217	111555882	-	69	D0_rep2
Chr12	111554157	111555919	111554217	111555882	-	84	D3_rep2
Chr12	111554157	111555919	111554217	111555882	-	173	D6_rep2
Chr12	112075677	112078741	112078266	112078633	-	2	D0_rep1
Chr12	112075677	112078741	112078266	112078633	-	3	D0_rep2
Chr12	113267842	113269845	113267956	113268741	+	1	D0_rep1
Chr12	113267842	113269845	113267956	113268741	+	2	D6_rep2
Chr12	113267842	113269845	113267956	113268741	+	4	D6_rep1
Chr12	113267842	113269845	113267956	113268741	+	7	D0_rep2
Chr12	116740344	116741094	116740521	116741035	+	4	D3_rep1
Chr12	116740344	116741094	116740521	116741035	+	5	D6_rep1
Chr12	116740344	116741094	116740521	116741035	+	8	D3_rep2
Chr12	116740344	116741094	116740521	116741035	+	10	D6_rep2
Chr12	120154969	120155719	120155040	120155240	-	10	D0_rep1
Chr12	120154969	120155719	120155040	120155240	-	11	D6_rep1
Chr12	120154969	120155719	120155040	120155240	-	12	D3_rep1
Chr12	120154969	120155719	120155430	120155591	-	14	D3_rep2
Chr12	120154969	120155719	120155430	120155591	-	31	D6_rep2
Chr12	120154969	120155719	120155430	120155591	-	81	D0_rep2
Chr12	120557281	120557682	120557466	120557545	+	2	D0_rep1
Chr12	120557281	120557682	120557466	120557545	+	2	D3_rep1
Chr12	120557281	120557682	120557466	120557545	+	5	D0_rep2
Chr12	120557281	120557682	120557466	120557545	+	7	D6_rep1
Chr12	120557281	120557682	120557466	120557545	+	10	D6_rep2
Chr12	120557281	120557682	120557466	120557545	+	12	D3_rep2
Chr12	121780871	121781192	121781006	121781082	-	1	D6_rep1
Chr12	121780871	121781192	121781006	121781082	-	3	D6_rep2
Chr12	122579904	122580670	122579977	122580602	+	1	D0_rep2
Chr12	122579904	122580670	122579977	122580602	+	5	D0_rep1
Chr12	123733925	123737271	123734008	123735530	+	1	D6_rep2
Chr12	123733925	123737271	123734008	123735530	+	3	D6_rep1
Chr12	132525733	132527988	132525823	132527952	+	1	D6_rep1
Chr12	132525733	132527988	132525823	132527952	+	1	D6_rep2
Chr12	132734384	132735512	132734575	132735405	-	2	D6_rep1
Chr12	132734384	132735512	132734575	132735405	-	4	D6_rep2
Chr12	132851617	132853573	132851737	132853430	-	1	D6_rep2
Chr12	132851617	132853573	132851737	132853430	-	5	D6_rep1
Chr13	19851354	19852190	19851448	19851688	-	1	D3_rep1
Chr13	19851354	19852190	19851448	19851688	-	1	D3_rep2
Chr13	19993062	19993919	19993564	19993825	+	2	D6_rep1
Chr13	19993062	19993919	19993564	19993825	+	10	D6_rep2
Chr13	95611444	95612177	95611493	95612036	-	1	D0_rep1
Chr13	95611444	95612177	95611493	95612036	-	1	D3_rep1
Chr13	95611444	95612177	95611493	95612036	-	3	D0_rep2
Chr13	95611444	95612177	95611493	95612036	-	8	D3_rep2
Chr13	106557047	106559657	106557131	106557558	-	1	D6_rep1
Chr13	106557047	106559657	106557131	106557558	-	2	D6_rep2
Chr13	110622215	110624279	110622366	110624233	+	2	D6_rep1
Chr13	110622215	110624279	110622366	110624233	+	14	D6_rep2
Chr14	21503172	21503881	21503577	21503663	-	1	D0_rep1
Chr14	21503172	21503881	21503577	21503663	-	2	D6_rep2
Chr14	21503172	21503881	21503577	21503663	-	6	D0_rep2
Chr14	21503172	21503881	21503577	21503663	-	12	D6_rep1
Chr14	30878810	30879485	30878944	30879422	+	1	D3_rep1
Chr14	30878810	30879485	30878944	30879422	+	3	D3_rep2
Chr14	30878810	30879485	30878944	30879422	+	4	D6_rep2
Chr14	30878810	30879485	30878944	30879422	+	6	D6_rep1
Chr14	39179090	39179462	39179246	39179323	+	2	D0_rep1
Chr14	39179090	39179462	39179246	39179323	+	7	D6_rep1
Chr14	39179090	39179462	39179246	39179323	+	7	D6_rep2
Chr14	39179090	39179462	39179246	39179323	+	9	D0_rep2
Chr14	49664625	49665163	49664674	49665106	-	4	D6_rep2
Chr14	49664625	49665163	49664674	49665106	-	7	D6_rep1
Chr14	50743415	50744365	50743529	50744242	-	3	D6_rep1
Chr14	50743415	50744365	50743529	50744242	-	5	D6_rep2
Chr14	54859680	54865436	54859736	54865326	-	1	D3_rep1
Chr14	54859680	54865436	54859736	54865326	-	3	D3_rep2
Chr14	54957033	54957635	54957204	54957591	-	1	D6_rep2
Chr14	54957033	54957635	54957204	54957591	-	2	D3_rep1
Chr14	54957033	54957635	54957204	54957591	-	5	D6_rep1
Chr14	54957033	54957635	54957204	54957591	-	10	D3_rep2
Chr14	61721508	61721823	61721654	61721738	+	2	D0_rep1
Chr14	61721508	61721823	61721654	61721738	+	3	D3_rep1
Chr14	61721508	61721823	61721654	61721738	+	3	D6_rep2
Chr14	61721508	61721823	61721654	61721738	+	6	D6_rep1
Chr14	61721508	61721823	61721654	61721738	+	11	D0_rep2
Chr14	61721508	61721823	61721654	61721738	+	22	D3_rep2
Chr14	73147794	73148094	73147876	73147966	+	1	D3_rep1
Chr14	73147794	73148094	73147876	73147966	+	2	D3_rep2
Chr14	75732337	75735289	75734050	75735194	+	1	D3_rep1
Chr14	75732337	75735289	75734050	75735194	+	1	D6_rep1
Chr14	75732337	75735289	75734050	75735194	+	2	D3_rep2
Chr14	75732337	75735289	75734050	75735194	+	4	D6_rep2
Chr14	95140658	95141748	95140759	95141153	-	12	D6_rep1
Chr14	95140658	95141748	95141187	95141682	-	13	D3_rep1
Chr14	95140658	95141748	95141187	95141682	-	14	D0_rep1
Chr14	95140658	95141748	95141187	95141682	-	14	D3_rep2
Chr14	95140658	95141748	95140759	95141153	-	24	D0_rep2
Chr14	95140658	95141748	95140759	95141153	-	39	D6_rep2
Chr14	102040235	102040673	102040410	102040597	+	1	D3_rep1
Chr14	102040235	102040673	102040410	102040597	+	2	D6_rep1
Chr14	102040235	102040673	102040410	102040597	+	4	D0_rep1
Chr14	102040235	102040673	102040410	102040597	+	5	D3_rep2
Chr14	102040235	102040673	102040410	102040597	+	5	D6_rep2
Chr14	102040235	102040673	102040410	102040597	+	11	D0_rep2
Chr14	102194937	102197847	102195120	102197754	+	1	D6_rep1
Chr14	102194937	102197847	102195120	102197754	+	1	D6_rep2
Chr15	25405460	25411971	25407262	25408619	-	1	D0_rep1
Chr15	25405460	25411971	25407262	25408571	-	3	D0_rep2
Chr15	25405460	25411971	25407262	25408571	-	3	D6_rep1
Chr15	25405460	25411971	25407262	25408571	-	8	D6_rep2
Chr15	40407635	40407990	40407812	40407938	+	2	D0_rep1
Chr15	40407635	40407990	40407725	40407938	+	2	D3_rep2
Chr15	40407635	40407990	40407725	40407938	+	3	D3_rep1
Chr15	40407635	40407990	40407725	40407938	+	11	D0_rep2
Chr15	50725220	50726377	50726126	50726320	-	2	D6_rep1
Chr15	50725220	50726377	50726126	50726320	-	4	D6_rep2
Chr15	50726072	50731039	50726126	50726320	-	3	D3_rep1
Chr15	50726072	50731039	50726126	50726320	-	4	D6_rep1
Chr15	50726072	50731039	50726126	50726320	-	8	D6_rep2
Chr15	50726072	50731039	50726126	50726320	-	12	D3_rep2
Chr15	56142777	56144483	56142900	56144400	-	4	D3_rep1
Chr15	56142777	56144483	56142900	56144400	-	12	D3_rep2
Chr15	58912562	58913696	58912610	58913498	-	3	D3_rep2
Chr15	58912562	58913696	58912610	58913498	-	5	D0_rep2
Chr15	58912562	58913696	58912610	58913498	-	6	D3_rep1
Chr15	58912562	58913696	58912610	58913498	-	7	D0_rep1
Chr15	58912562	58913696	58912610	58913498	-	15	D6_rep1
Chr15	58912562	58913696	58912610	58913498	-	23	D6_rep2
Chr15	58912562	58916999	58912610	58913498	-	3	D3_rep1
Chr15	58912562	58916999	58912610	58913498	-	7	D6_rep1
Chr15	58912562	58916999	58912610	58913498	-	12	D3_rep2
Chr15	58912562	58916999	58912610	58913498	-	27	D6_rep2
Chr15	74572861	74573204	74572933	74573131	+	5	D6_rep1
Chr15	74572861	74573204	74572933	74573131	+	7	D6_rep2
Chr15	85113872	85115487	85114037	85115438	+	3	D3_rep1
Chr15	85113872	85115487	85114037	85115438	+	12	D3_rep2
Chr15	85113872	85115487	85114037	85115438	+	16	D6_rep1
Chr15	85113872	85115487	85114037	85115438	+	33	D6_rep2
Chr15	89888520	89889140	89888632	89889048	-	1	D0_rep1
Chr15	89888520	89889140	89888632	89889048	-	4	D0_rep2
Chr15	89888520	89889140	89888632	89889048	-	4	D3_rep1
Chr15	89888520	89889140	89888632	89889048	-	7	D3_rep2
Chr15	89888520	89889140	89888632	89889048	-	10	D6_rep2
Chr15	89888520	89889140	89888632	89889048	-	11	D6_rep1
Chr16	533945	536142	533998	536028	+	2	D0_rep1
Chr16	533945	536142	533998	536028	+	4	D3_rep1
Chr16	533945	536142	533998	536028	+	10	D3_rep2
Chr16	533945	536142	533998	536028	+	10	D6_rep1
Chr16	533945	536142	533998	536028	+	17	D0_rep2
Chr16	533945	536142	533998	536028	+	22	D6_rep2
Chr16	1809237	1809833	1809382	1809753	-	6	D6_rep1
Chr16	1809237	1809833	1809382	1809753	-	7	D3_rep2
Chr16	1809237	1809833	1809382	1809753	-	15	D3_rep1
Chr16	1809237	1809833	1809382	1809753	-	30	D6_rep2
Chr16	4332214	4333519	4332452	4333346	+	1	D0_rep1
Chr16	4332214	4333519	4332452	4333346	+	2	D0_rep2
Chr16	4332214	4333519	4332452	4333346	+	5	D6_rep2
Chr16	4332214	4333519	4332452	4333346	+	11	D6_rep1
Chr16	4466152	4469465	4466402	4469226	-	1	D0_rep1
Chr16	4466152	4469465	4466402	4469226	-	2	D0_rep2
Chr16	4466152	4469465	4466402	4469226	-	2	D3_rep1
Chr16	4466152	4469465	4466402	4469226	-	2	D6_rep1
Chr16	4466152	4469465	4466402	4469226	-	5	D3_rep2
Chr16	4466152	4469465	4466402	4469226	-	7	D6_rep2
Chr16	19616113	19616808	19616191	19616685	+	13	D6_rep1
Chr16	19616113	19616808	19616191	19616685	+	16	D6_rep2
Chr16	19616113	19626223	19616191	19616685	+	1	D6_rep1
Chr16	19616113	19626223	19616191	19616685	+	2	D6_rep2
Chr16	24977214	24979005	24977319	24978965	-	2	D6_rep1
Chr16	24977214	24979005	24977319	24978965	-	14	D6_rep2
Chr16	29904851	29905959	29904965	29905787	+	1	D0_rep1
Chr16	29904851	29905959	29904965	29905787	+	2	D0_rep2
Chr16	29904851	29905959	29904965	29905787	+	2	D6_rep2
Chr16	29904851	29905959	29904965	29905787	+	4	D6_rep1
Chr16	29905787	29906127	29905959	29906078	+	2	D3_rep1
Chr16	29905787	29906127	29905959	29906078	+	14	D6_rep1
Chr16	29905787	29906127	29905959	29906078	+	20	D0_rep1
Chr16	29905787	29906127	29905959	29906078	+	31	D3_rep2
Chr16	29905787	29906127	29905959	29906078	+	32	D0_rep2
Chr16	29905787	29906127	29905959	29906078	+	40	D6_rep2
Chr16	31722625	31723353	31722752	31723257	+	15	D3_rep1
Chr16	31722625	31723353	31722752	31723257	+	39	D6_rep1
Chr16	31722625	31723353	31722752	31723257	+	43	D3_rep2
Chr16	31722625	31723353	31722752	31723257	+	113	D6_rep2
Chr16	48347506	48348290	48347714	48348099	+	1	D3_rep1
Chr16	48347506	48348290	48347714	48348099	+	2	D3_rep2
Chr16	48347506	48348290	48347714	48348099	+	2	D6_rep1
Chr16	48347506	48348290	48347714	48348099	+	5	D6_rep2
Chr16	58675939	58676346	58676054	58676288	-	3	D6_rep1
Chr16	58675939	58676346	58676054	58676288	-	7	D6_rep2
Chr16	58675939	58676346	58676054	58676288	-	9	D0_rep1
Chr16	58675939	58676346	58676054	58676288	-	13	D0_rep2
Chr16	69370482	69372355	69370629	69372268	-	2	D3_rep2
Chr16	69370482	69372355	69370629	69372268	-	3	D3_rep1
Chr16	69370482	69372355	69370629	69372268	-	9	D6_rep1
Chr16	69370482	69372355	69370629	69372268	-	10	D6_rep2
Chr16	70463168	70463774	70463272	70463622	+	1	D3_rep1
Chr16	70463168	70463774	70463272	70463622	+	1	D3_rep2
Chr16	70463168	70463774	70463272	70463622	+	6	D0_rep2
Chr16	70463168	70463774	70463272	70463622	+	8	D0_rep1
Chr16	71920738	71921453	71920822	71921342	+	3	D3_rep2
Chr16	71920738	71921453	71920822	71921342	+	3	D6_rep1
Chr16	71920738	71921453	71920822	71921342	+	4	D3_rep1
Chr16	71920738	71921453	71920822	71921342	+	16	D6_rep2
Chr16	89978809	89980336	89978878	89980241	+	1	D6_rep1
Chr16	89978809	89980336	89978878	89980241	+	2	D6_rep2
Chr17	1842802	1844686	1842853	1843919	+	2	D3_rep1
Chr17	1842802	1844686	1842853	1843919	+	2	D3_rep2
Chr17	3814321	3816270	3814483	3816115	-	4	D6_rep1
Chr17	3814321	3816270	3814483	3816115	-	15	D6_rep2
Chr17	5460938	5462546	5461109	5462318	-	1	D3_rep1
Chr17	5460938	5462546	5461109	5462318	-	3	D6_rep1
Chr17	5460938	5462546	5461109	5462318	-	5	D3_rep2
Chr17	5460938	5462546	5461109	5462318	-	7	D6_rep2
Chr17	16313546	16317908	16316712	16317774	+	1	D0_rep1
Chr17	16313546	16317908	16316712	16317774	+	2	D6_rep2
Chr17	16313546	16317908	16316712	16317774	+	4	D0_rep2
Chr17	16313546	16317908	16316712	16317774	+	6	D6_rep1
Chr17	17075709	17078076	17075787	17078010	+	1	D3_rep1
Chr17	17075709	17078076	17075787	17078010	+	3	D3_rep2
Chr17	18024623	18028659	18026416	18028231	-	1	D6_rep2
Chr17	18024623	18028659	18026416	18028231	-	4	D6_rep1
Chr17	32030655	32031458	32030727	32031377	+	1	D6_rep1
Chr17	32030655	32031458	32030727	32031377	+	4	D6_rep2
Chr17	32173830	32175362	32173912	32175318	+	4	D3_rep1
Chr17	32173830	32175362	32173912	32175318	+	8	D6_rep2
Chr17	32173830	32175362	32173912	32175318	+	10	D3_rep2
Chr17	32173830	32175362	32173912	32175318	+	14	D6_rep1
Chr17	36509061	36511455	36510917	36511364	-	1	D3_rep1
Chr17	36509061	36511455	36510917	36511364	-	8	D6_rep1
Chr17	36509061	36511455	36510917	36511364	-	12	D3_rep2
Chr17	36509061	36511455	36510917	36511364	-	23	D6_rep2
Chr17	47676408	47677127	47676491	47677019	+	1	D0_rep2
Chr17	47676408	47677127	47676491	47677019	+	4	D0_rep1
Chr17	48112030	48112660	48112111	48112573	+	2	D3_rep1
Chr17	48112030	48112660	48112111	48112573	+	2	D3_rep2
Chr17	49311311	49312042	49311456	49311926	-	2	D3_rep1
Chr17	49311311	49312042	49311456	49311926	-	10	D6_rep1
Chr17	49311311	49312042	49311456	49311926	-	20	D3_rep2
Chr17	49311311	49312042	49311456	49311926	-	45	D6_rep2
Chr17	59586152	59588053	59586233	59587895	+	1	D6_rep1
Chr17	59586152	59588053	59586233	59587895	+	12	D6_rep2
Chr17	59936214	59936541	59936277	59936463	+	1	D6_rep1
Chr17	59936214	59936541	59936277	59936463	+	4	D0_rep1
Chr17	59936214	59936541	59936277	59936463	+	6	D0_rep2
Chr17	59936214	59936541	59936277	59936463	+	10	D6_rep2
Chr17	61776400	61780401	61776562	61780260	-	1	D6_rep1
Chr17	61776400	61780401	61776562	61780260	-	10	D6_rep2
Chr17	61984170	61985090	61984865	61984999	-	4	D3_rep1
Chr17	61984170	61985090	61984865	61984999	-	4	D3_rep2
Chr17	61984170	61985090	61984865	61984999	-	5	D0_rep1
Chr17	61984170	61985090	61984865	61984999	-	7	D0_rep2
Chr17	61984170	61985090	61984865	61984999	-	14	D6_rep1
Chr17	61984170	61985090	61984865	61984999	-	16	D6_rep2
Chr17	64522701	64526200	64525882	64526070	+	1	D6_rep1
Chr17	64522701	64526200	64525882	64526070	+	1	D6_rep2
Chr17	73202999	73203793	73203146	73203631	+	2	D6_rep1
Chr17	73202999	73203793	73203146	73203631	+	13	D6_rep2
Chr17	75812111	75813878	75812288	75812454	+	2	D6_rep1
Chr17	75812111	75813878	75812288	75812454	+	4	D6_rep2
Chr17	75937565	75938232	75937593	75938146	-	4	D6_rep1
Chr17	75937565	75938232	75937593	75938146	-	9	D6_rep2
Chr17	76312869	76313891	76313016	76313820	-	10	D0_rep1
Chr17	76312869	76313891	76313016	76313820	-	16	D3_rep1
Chr17	76312869	76313891	76313016	76313820	-	33	D3_rep2
Chr17	76312869	76313891	76313016	76313820	-	57	D0_rep2
Chr17	76312869	76313891	76313016	76313820	-	66	D6_rep1
Chr17	76312869	76313891	76313016	76313820	-	95	D6_rep2
Chr17	80081545	80082058	80081789	80081875	+	1	D0_rep1
Chr17	80081545	80082058	80081789	80081875	+	4	D3_rep2
Chr17	80081545	80082058	80081789	80081875	+	5	D3_rep1
Chr17	80081545	80082058	80081789	80081875	+	10	D0_rep2
Chr17	80081545	80082058	80081789	80081875	+	17	D6_rep1
Chr17	80081545	80082058	80081789	80081875	+	21	D6_rep2
Chr17	81206743	81207239	81206871	81207124	-	1	D0_rep1
Chr17	81206743	81207239	81206871	81207124	-	3	D6_rep2
Chr17	81206743	81207239	81206871	81207124	-	7	D6_rep1
Chr17	81206743	81207239	81206871	81207124	-	13	D0_rep2
Chr17	81280608	81284895	81280733	81282188	-	1	D6_rep2
Chr17	81280608	81284895	81283502	81284849	-	4	D6_rep1
Chr17	82563353	82568201	82563548	82568053	+	7	D6_rep1
Chr17	82563353	82568201	82563548	82568053	+	17	D6_rep2
Chr17	82563353	82571870	82563548	82568053	+	1	D0_rep1
Chr17	82563353	82571870	82563548	82568053	+	1	D0_rep2
Chr17	82563353	82571870	82563548	82568053	+	1	D6_rep1
Chr17	82563353	82571870	82563548	82568053	+	2	D6_rep2
Chr17	82884144	82893632	82889697	82893546	+	1	D0_rep1
Chr17	82884144	82893632	82889697	82893546	+	6	D0_rep2
Chr18	9931809	9937066	9936213	9936985	+	1	D3_rep2
Chr18	9931809	9937066	9936213	9936985	+	4	D3_rep1
Chr18	46122466	46123364	46122590	46123298	+	1	D6_rep1
Chr18	46122466	46123364	46122590	46123298	+	19	D6_rep2
Chr18	70121555	70128546	70127741	70128357	-	1	D3_rep1
Chr18	70121555	70128546	70127741	70128357	-	6	D3_rep2
Chr19	334399	336173	334542	336082	-	8	D6_rep1
Chr19	334399	336173	334542	336082	-	8	D6_rep2
Chr19	418922	425231	422456	425096	-	2	D6_rep1
Chr19	418922	425231	422456	425096	-	2	D6_rep2
Chr19	1218416	1219413	1218500	1219323	+	2	D6_rep1
Chr19	1218416	1219413	1218500	1219323	+	3	D6_rep2
Chr19	2137726	2138714	2137807	2138618	-	2	D3_rep1
Chr19	2137726	2138714	2137807	2138618	-	2	D6_rep1
Chr19	2137726	2138714	2137807	2138618	-	8	D3_rep2
Chr19	2137726	2138714	2137807	2138618	-	20	D6_rep2
Chr19	3660965	3662001	3661083	3661870	-	5	D0_rep1
Chr19	3660965	3662001	3661083	3661870	-	5	D3_rep2
Chr19	3660965	3662001	3661083	3661870	-	7	D3_rep1
Chr19	3660965	3662001	3661083	3661870	-	13	D6_rep2
Chr19	3660965	3662001	3661083	3661870	-	15	D0_rep2
Chr19	3660965	3662001	3661083	3661870	-	15	D6_rep1
Chr19	4941527	4941931	4941628	4941744	+	1	D6_rep2
Chr19	4941527	4941931	4941628	4941744	+	2	D0_rep1
Chr19	4941527	4941931	4941628	4941744	+	3	D6_rep1
Chr19	4941527	4941931	4941628	4941744	+	8	D0_rep2
Chr19	9828591	9828874	9828675	9828836	+	1	D0_rep2
Chr19	9828591	9828874	9828675	9828836	+	4	D0_rep1
Chr19	10154292	10155056	10154773	10154904	-	1	D0_rep2
Chr19	10154292	10155056	10154773	10154904	-	3	D0_rep1
Chr19	10154292	10155056	10154773	10154904	-	4	D6_rep1
Chr19	10154292	10155056	10154773	10154904	-	4	D6_rep2
Chr19	10258221	10258685	10258522	10258608	+	3	D6_rep1
Chr19	10258221	10258685	10258522	10258608	+	4	D6_rep2
Chr19	10908038	10909207	10908145	10908549	+	2	D6_rep1
Chr19	10908038	10909207	10908145	10908549	+	12	D6_rep2
Chr19	11178344	11178720	11178471	11178552	-	2	D0_rep1
Chr19	11178344	11178720	11178471	11178552	-	2	D0_rep2
Chr19	11416613	11417059	11416667	11416835	-	2	D6_rep1
Chr19	11416613	11417059	11416667	11416835	-	3	D3_rep2
Chr19	11416613	11417059	11416667	11416835	-	4	D3_rep1
Chr19	11416613	11417059	11416667	11416835	-	8	D6_rep2
Chr19	12928341	12928847	12928457	12928534	-	8	D3_rep1
Chr19	12928341	12928847	12928457	12928534	-	14	D6_rep1
Chr19	12928341	12928847	12928457	12928534	-	15	D0_rep1
Chr19	12928341	12928847	12928457	12928534	-	15	D6_rep2
Chr19	12928341	12928847	12928457	12928534	-	19	D3_rep2
Chr19	12928341	12928847	12928457	12928534	-	44	D0_rep2
Chr19	14705053	14706773	14705170	14706685	+	4	D6_rep2
Chr19	14705053	14706773	14705170	14706685	+	5	D6_rep1
Chr19	17159394	17163122	17162466	17162987	+	1	D6_rep1
Chr19	17159394	17163122	17162466	17162987	+	1	D6_rep2
Chr19	17162349	17163122	17162466	17162987	+	3	D6_rep2
Chr19	17162349	17163122	17162466	17162987	+	6	D6_rep1
Chr19	17276494	17276909	17276624	17276822	+	25	D0_rep1
Chr19	17276494	17276909	17276624	17276822	+	56	D3_rep1
Chr19	17276494	17276909	17276624	17276822	+	85	D3_rep2
Chr19	17276494	17276909	17276624	17276822	+	91	D6_rep1
Chr19	17276494	17276909	17276624	17276822	+	124	D0_rep2
Chr19	17276494	17276909	17276624	17276822	+	174	D6_rep2
Chr19	18537600	18538433	18537773	18538215	-	2	D3_rep1
Chr19	18537600	18538433	18537773	18538215	-	6	D3_rep2
Chr19	18537600	18538433	18537773	18538215	-	8	D0_rep1
Chr19	18537600	18538433	18537773	18538215	-	8	D6_rep1
Chr19	18537600	18538433	18537773	18538215	-	8	D6_rep2
Chr19	18537600	18538433	18537773	18538215	-	19	D0_rep2
Chr19	18537600	18538436	18537773	18538215	-	7	D0_rep1
Chr19	18537600	18538436	18537773	18538215	-	8	D6_rep2
Chr19	18537600	18538436	18537773	18538215	-	9	D6_rep1
Chr19	18537600	18538436	18537773	18538215	-	14	D3_rep1
Chr19	18537600	18538436	18537773	18538215	-	19	D3_rep2
Chr19	18537600	18538436	18537773	18538215	-	50	D0_rep2
Chr19	18539370	18539720	18539459	18539550	-	2	D3_rep1
Chr19	18539370	18539720	18539459	18539550	-	7	D3_rep2
Chr19	18539370	18539720	18539459	18539550	-	9	D6_rep1
Chr19	18539370	18539720	18539459	18539550	-	11	D0_rep1
Chr19	18539370	18539720	18539459	18539550	-	20	D0_rep2
Chr19	18539370	18539720	18539459	18539550	-	32	D6_rep2
Chr19	18924232	18924979	18924699	18924881	+	1	D6_rep2
Chr19	18924232	18924979	18924699	18924881	+	6	D6_rep1
Chr19	18938352	18939049	18938484	18938727	-	8	D6_rep2
Chr19	18938352	18939049	18938484	18938727	-	9	D6_rep1
Chr19	19198106	19199234	19198232	19198656	+	1	D6_rep2
Chr19	19198106	19199234	19198232	19198656	+	6	D6_rep1
Chr19	19526181	19527770	19527352	19527700	+	1	D0_rep1
Chr19	19526181	19527770	19527352	19527700	+	1	D3_rep1
Chr19	19526181	19527770	19527352	19527700	+	4	D3_rep2
Chr19	19526181	19527770	19527352	19527700	+	6	D6_rep1
Chr19	19526181	19527770	19527352	19527700	+	10	D0_rep2
Chr19	19526181	19527770	19527352	19527700	+	18	D6_rep2
Chr19	21098184	21098910	21098311	21098811	+	2	D6_rep1
Chr19	21098184	21098910	21098311	21098811	+	3	D6_rep2
Chr19	21405128	21405856	21405255	21405757	+	2	D3_rep1
Chr19	21405128	21405856	21405255	21405757	+	4	D3_rep2
Chr19	21405128	21405856	21405255	21405757	+	4	D6_rep1
Chr19	21405128	21405856	21405255	21405757	+	15	D6_rep2
Chr19	23662113	23663158	23662209	23663031	-	1	D3_rep1
Chr19	23662113	23663158	23662209	23663031	-	2	D6_rep1
Chr19	23662113	23663158	23662209	23663031	-	5	D3_rep2
Chr19	23662113	23663158	23662209	23663031	-	10	D6_rep2
Chr19	34347876	34351592	34348042	34349015	+	1	D6_rep1
Chr19	34347876	34351592	34348042	34349015	+	9	D6_rep2
Chr19	34443843	34445121	34443911	34444999	+	2	D6_rep1
Chr19	34443843	34445121	34443911	34444999	+	2	D6_rep2
Chr19	36712385	36712867	36712512	36712780	+	1	D6_rep1
Chr19	36712385	36712867	36712512	36712780	+	8	D6_rep2
Chr19	38917723	38918813	38918008	38918093	-	2	D0_rep2
Chr19	38917723	38918813	38917833	38917920	-	3	D0_rep1
Chr19	40237968	40240110	40238973	40240044	-	1	D3_rep1
Chr19	40237968	40240110	40238973	40240044	-	1	D3_rep2
Chr19	40237968	40240110	40238973	40240044	-	7	D6_rep1
Chr19	40237968	40240110	40238973	40240044	-	8	D6_rep2
Chr19	40623603	40624082	40623732	40623935	+	2	D6_rep1
Chr19	40623603	40624082	40623732	40623935	+	7	D6_rep2
Chr19	40705095	40705447	40705181	40705324	-	3	D3_rep2
Chr19	40705095	40705447	40705181	40705324	-	5	D3_rep1
Chr19	40705095	40705447	40705181	40705324	-	5	D6_rep1
Chr19	40705095	40705447	40705181	40705324	-	7	D6_rep2
Chr19	45263112	45263367	45263166	45263318	+	8	D0_rep1
Chr19	45263112	45263367	45263166	45263318	+	8	D3_rep1
Chr19	45263112	45263367	45263166	45263318	+	16	D0_rep2
Chr19	45263112	45263367	45263166	45263318	+	20	D6_rep2
Chr19	45263112	45263367	45263166	45263318	+	22	D6_rep1
Chr19	45263112	45263367	45263166	45263318	+	34	D3_rep2
Chr19	45277922	45278615	45278042	45278515	+	1	D0_rep1
Chr19	45277922	45278615	45278042	45278515	+	4	D3_rep1
Chr19	45277922	45278615	45278042	45278515	+	5	D6_rep1
Chr19	45277922	45278615	45278042	45278515	+	5	D6_rep2
Chr19	45277922	45278615	45278042	45278515	+	7	D0_rep2
Chr19	45277922	45278615	45278042	45278515	+	12	D3_rep2
Chr19	45854174	45854507	45854240	45854390	-	3	D0_rep1
Chr19	45854174	45854507	45854240	45854390	-	6	D0_rep2
Chr19	45854174	45854507	45854240	45854390	-	8	D6_rep1
Chr19	45854174	45854507	45854240	45854390	-	9	D6_rep2
Chr19	47264602	47264946	47264686	47264772	+	2	D3_rep1
Chr19	47264602	47264946	47264686	47264772	+	10	D0_rep1
Chr19	47264602	47264946	47264686	47264772	+	15	D6_rep1
Chr19	47264602	47264946	47264686	47264772	+	15	D6_rep2
Chr19	47264602	47264946	47264686	47264772	+	28	D3_rep2
Chr19	47264602	47264946	47264686	47264772	+	44	D0_rep2
Chr19	47416651	47417350	47416702	47416803	-	1	D3_rep1
Chr19	47416651	47417350	47416702	47416803	-	3	D6_rep2
Chr19	47416651	47417350	47416702	47416803	-	8	D0_rep1
Chr19	47416651	47417350	47416702	47416803	-	8	D0_rep2
Chr19	47416651	47417350	47416702	47416803	-	8	D3_rep2
Chr19	47416651	47417350	47416702	47416803	-	10	D6_rep1
Chr19	48143542	48143963	48143599	48143882	-	1	D0_rep2
Chr19	48143542	48143963	48143599	48143882	-	5	D0_rep1
Chr19	49828448	49829090	49828547	49828969	+	1	D6_rep1
Chr19	49828448	49829090	49828547	49828969	+	1	D6_rep2
Chr19	52076043	52077084	52076172	52076957	-	1	D0_rep1
Chr19	52076043	52077084	52076172	52076957	-	2	D0_rep2
Chr19	55245119	55245678	55245185	55245264	-	3	D6_rep1
Chr19	55245119	55245678	55245402	55245491	-	4	D6_rep2
Chr2	9535833	9536828	9535922	9536697	-	2	D6_rep2
Chr2	9535833	9536828	9535922	9536697	-	3	D6_rep1
Chr2	32174062	32184338	32177596	32184272	+	2	D0_rep1
Chr2	32174062	32184338	32174147	32175318	+	4	D0_rep2
Chr2	38746143	38746747	38746179	38746693	-	4	D3_rep1
Chr2	38746143	38746747	38746179	38746693	-	6	D3_rep2
Chr2	39336919	39337581	39336967	39337525	-	10	D6_rep1
Chr2	39336919	39337581	39336967	39337525	-	40	D6_rep2
Chr2	42315961	42317524	42316050	42317426	+	5	D3_rep1
Chr2	42315961	42317524	42316050	42317426	+	6	D3_rep2
Chr2	42315961	42317524	42316050	42317426	+	13	D6_rep1
Chr2	42315961	42317524	42316050	42317426	+	15	D6_rep2
Chr2	44704282	44715353	44704343	44706286	+	1	D6_rep1
Chr2	44704282	44715353	44704343	44706286	+	7	D6_rep2
Chr2	50921868	50925952	50921880	50922657	-	4	D3_rep2
Chr2	50921868	50925952	50921880	50922657	-	7	D3_rep1
Chr2	50921868	50925952	50921880	50922657	-	12	D6_rep2
Chr2	50921868	50925952	50921880	50922657	-	13	D6_rep1
Chr2	50921868	50925955	50921880	50922657	-	8	D0_rep1
Chr2	50921868	50925955	50921880	50922657	-	58	D3_rep1
Chr2	50921868	50925955	50921880	50922657	-	69	D0_rep2
Chr2	50921868	50925955	50921880	50922657	-	90	D6_rep1
Chr2	50921868	50925955	50921880	50922657	-	207	D3_rep2
Chr2	50921868	50925955	50921880	50922657	-	208	D6_rep2
Chr2	61115978	61118116	61116070	61117356	+	1	D3_rep2
Chr2	61115978	61118116	61117385	61117466	+	2	D6_rep1
Chr2	61115978	61118116	61117385	61117466	+	4	D6_rep2
Chr2	61115978	61118116	61117385	61117466	+	5	D3_rep1
Chr2	61522610	61526521	61522683	61526419	-	2	D6_rep2
Chr2	61522610	61526521	61525333	61525491	-	8	D6_rep1
Chr2	63856305	63857936	63856433	63856787	+	1	D6_rep1
Chr2	63856305	63857936	63856433	63856787	+	4	D6_rep2
Chr2	85368685	85369830	85368754	85369738	+	5	D3_rep2
Chr2	85368685	85369830	85368754	85369738	+	6	D3_rep1
Chr2	85555483	85556260	85555590	85556181	-	1	D0_rep2
Chr2	85555483	85556260	85555590	85556181	-	2	D0_rep1
Chr2	86127160	86127991	86127305	86127940	+	6	D6_rep1
Chr2	86127160	86127991	86127305	86127940	+	8	D6_rep2
Chr2	95851165	95860074	95851787	95852125	-	1	D6_rep1
Chr2	95851165	95860074	95851787	95852125	-	1	D6_rep2
Chr2	105342847	105343223	105342974	105343100	+	5	D6_rep2
Chr2	105342847	105343223	105342974	105343100	+	8	D6_rep1
Chr2	106158057	106166083	106158118	106163666	-	3	D6_rep1
Chr2	106158057	106166083	106158118	106163666	-	18	D6_rep2
Chr2	110161602	110163132	110161697	110163047	-	1	D6_rep1
Chr2	110161602	110163132	110161697	110163047	-	8	D6_rep2
Chr2	110161602	110163135	110161697	110163047	-	3	D6_rep1
Chr2	110161602	110163135	110161697	110163047	-	5	D3_rep1
Chr2	110161602	110163135	110161697	110163047	-	8	D3_rep2
Chr2	110161602	110163135	110161697	110163047	-	55	D6_rep2
Chr2	128164729	128171284	128170390	128171204	+	1	D6_rep1
Chr2	128164729	128171284	128170390	128171204	+	8	D6_rep2
Chr2	134317528	134318739	134317605	134318649	+	3	D0_rep1
Chr2	134317528	134318739	134317605	134318649	+	3	D0_rep2
Chr2	134317528	134318739	134317605	134318649	+	3	D3_rep2
Chr2	134317528	134318739	134317605	134318649	+	5	D3_rep1
Chr2	134317528	134318739	134317605	134318649	+	31	D6_rep1
Chr2	134317528	134318739	134317605	134318649	+	38	D6_rep2
Chr2	178535731	178542361	178539890	178540106	+	2	D6_rep1
Chr2	178535731	178542361	178539890	178540106	+	11	D6_rep2
Chr2	182994838	182995838	182994887	182995700	-	3	D6_rep1
Chr2	182994838	182995838	182994887	182995700	-	15	D6_rep2
Chr2	200856681	200856985	200856811	200856890	-	8	D3_rep1
Chr2	200856681	200856985	200856811	200856890	-	19	D0_rep1
Chr2	200856681	200856985	200856811	200856890	-	38	D6_rep1
Chr2	200856681	200856985	200856811	200856890	-	67	D0_rep2
Chr2	200856681	200856985	200856811	200856890	-	87	D6_rep2
Chr2	200856681	200856985	200856811	200856890	-	88	D3_rep2
Chr2	207576630	207577224	207576693	207577109	+	4	D6_rep2
Chr2	207576630	207577224	207576693	207577109	+	7	D6_rep1
Chr2	218634104	218634630	218634221	218634457	+	1	D6_rep1
Chr2	218634104	218634630	218634221	218634457	+	6	D6_rep2
Chr2	231214830	231216793	231215001	231216637	+	1	D3_rep1
Chr2	231214830	231216793	231215001	231216637	+	1	D3_rep2
Chr2	231788554	231791808	231788732	231791732	+	2	D3_rep1
Chr2	231788554	231791808	231791173	231791732	+	7	D3_rep2
Chr2	237973091	237973747	237973225	237973648	+	1	D3_rep1
Chr2	237973091	237973747	237973225	237973648	+	1	D3_rep2
Chr2	238093860	238094522	238093944	238094419	+	2	D0_rep1
Chr2	238093860	238094522	238093944	238094419	+	2	D0_rep2
Chr2	241403827	241404841	241403932	241404798	+	1	D3_rep1
Chr2	241403827	241404841	241403932	241404798	+	2	D3_rep2
Chr20	2986764	2988474	2986849	2988031	+	3	D3_rep2
Chr20	2986764	2988474	2986849	2988031	+	4	D6_rep1
Chr20	2986764	2988474	2986849	2988031	+	5	D3_rep1
Chr20	2986764	2988474	2986849	2988031	+	12	D6_rep2
Chr20	33619516	33628435	33623296	33624763	+	1	D6_rep1
Chr20	33619516	33628435	33623296	33624763	+	2	D6_rep2
Chr20	34072065	34078553	34076815	34077027	+	1	D6_rep1
Chr20	34072065	34078553	34076815	34077027	+	2	D6_rep2
Chr20	38900580	38902792	38900684	38902667	+	1	D6_rep1
Chr20	38900580	38902792	38900684	38902667	+	6	D6_rep2
Chr20	41159605	41160153	41159758	41159869	+	1	D0_rep1
Chr20	41159605	41160153	41159758	41159869	+	1	D0_rep2
Chr20	58438944	58441083	58439025	58440906	+	2	D6_rep1
Chr20	58438944	58441083	58439025	58440906	+	4	D3_rep1
Chr20	58438944	58441083	58439025	58440906	+	8	D6_rep2
Chr20	58438944	58441083	58439025	58440906	+	10	D3_rep2
Chr20	62139074	62140944	62139197	62139695	-	1	D6_rep1
Chr20	62139074	62140944	62139197	62139695	-	2	D0_rep2
Chr20	62139074	62140944	62139197	62139695	-	3	D0_rep1
Chr20	62139074	62140944	62139197	62139780	-	14	D6_rep2
Chr21	15762890	15766141	15762968	15765996	+	4	D6_rep1
Chr21	15762890	15766141	15762968	15765996	+	11	D6_rep2
Chr21	34102834	34103519	34102908	34103496	+	1	D6_rep1
Chr21	34102834	34103519	34102908	34103496	+	3	D6_rep2
Chr21	37420298	37421866	37420384	37421773	+	2	D3_rep1
Chr21	37420298	37421866	37420384	37421773	+	5	D0_rep2
Chr21	37420298	37421866	37420384	37421773	+	6	D0_rep1
Chr21	37420298	37421866	37420384	37421773	+	13	D3_rep2
Chr21	44855209	44861271	44855256	44856192	-	3	D3_rep1
Chr21	44855209	44861271	44855256	44856192	-	16	D3_rep2
Chr22	20400631	20401372	20400758	20401276	+	1	D6_rep1
Chr22	20400631	20401372	20400758	20401276	+	1	D6_rep2
Chr22	20551435	20555148	20551487	20553144	+	3	D3_rep1
Chr22	20551435	20555148	20551487	20553144	+	3	D3_rep2
Chr22	20551435	20555148	20551487	20553144	+	6	D6_rep1
Chr22	20551435	20555148	20551487	20553144	+	11	D6_rep2
Chr22	21669912	21675115	21669962	21670263	+	1	D0_rep1
Chr22	21669912	21675115	21669962	21670263	+	2	D3_rep1
Chr22	21669912	21675115	21669962	21670263	+	4	D0_rep2
Chr22	21669912	21675115	21669962	21670263	+	6	D3_rep2
Chr22	23152460	23153134	23152526	23153032	+	2	D6_rep2
Chr22	23152460	23153134	23152526	23153032	+	6	D6_rep1
Chr22	26457858	26458577	26457967	26458444	-	1	D0_rep2
Chr22	26457858	26458577	26457967	26458444	-	1	D3_rep1
Chr22	26457858	26458577	26457967	26458444	-	4	D0_rep1
Chr22	26457858	26458577	26457967	26458444	-	10	D3_rep2
Chr22	31602211	31602785	31602293	31602606	+	6	D6_rep1
Chr22	31602211	31602785	31602293	31602606	+	6	D6_rep2
Chr22	37812886	37813609	37812988	37813462	+	1	D6_rep2
Chr22	37812886	37813609	37812988	37813276	+	4	D6_rep1
Chr22	38245934	38248019	38246100	38247769	-	5	D6_rep2
Chr22	38245934	38248019	38246100	38247769	-	8	D6_rep1
Chr22	42019310	42020096	42019419	42019661	+	1	D6_rep1
Chr22	42019310	42020096	42019419	42019661	+	3	D6_rep2
Chr3	5174016	5174414	5174084	5174343	+	3	D3_rep1
Chr3	5174016	5174414	5174084	5174343	+	8	D0_rep1
Chr3	5174016	5174414	5174084	5174343	+	29	D0_rep2
Chr3	5174016	5174414	5174084	5174343	+	35	D6_rep1
Chr3	5174016	5174414	5174084	5174343	+	39	D3_rep2
Chr3	5174016	5174414	5174084	5174343	+	74	D6_rep2
Chr3	16271658	16272321	16271722	16272144	+	1	D6_rep2
Chr3	16271658	16272321	16271722	16272144	+	2	D6_rep1
Chr3	16301625	16302748	16301868	16302639	+	1	D6_rep1
Chr3	16301625	16302748	16301868	16302639	+	16	D6_rep2
Chr3	47720665	47736126	47720735	47729024	-	3	D6_rep2
Chr3	47720665	47736126	47720735	47729024	-	4	D6_rep1
Chr3	48858506	48859627	48858631	48859091	-	1	D6_rep1
Chr3	48858506	48859627	48859201	48859554	-	3	D6_rep2
Chr3	49324701	49325845	49324763	49324893	-	1	D0_rep2
Chr3	49324701	49325845	49324763	49324893	-	2	D0_rep1
Chr3	49847524	49848200	49847608	49848142	-	1	D3_rep1
Chr3	49847524	49848200	49847560	49848142	-	2	D0_rep1
Chr3	49847524	49848200	49847608	49848142	-	2	D3_rep2
Chr3	49847524	49848200	49847608	49848142	-	7	D0_rep2
Chr3	49847524	49848200	49847608	49848142	-	7	D6_rep1
Chr3	49847524	49848200	49847608	49848142	-	17	D6_rep2
Chr3	51630271	51630931	51630388	51630704	+	1	D3_rep1
Chr3	51630271	51630931	51630388	51630704	+	2	D3_rep2
Chr3	52122378	52125181	52122477	52125112	-	1	D6_rep1
Chr3	52122378	52125181	52122477	52125112	-	2	D0_rep1
Chr3	52122378	52125181	52122477	52125112	-	4	D0_rep2
Chr3	52122378	52125181	52122477	52125112	-	4	D6_rep2
Chr3	56627036	56628614	56627741	56628491	-	4	D0_rep1
Chr3	56627036	56628614	56627741	56628491	-	6	D3_rep1
Chr3	56627036	56628614	56627145	56627581	-	8	D0_rep2
Chr3	56627036	56628614	56627741	56628491	-	9	D3_rep2
Chr3	56627036	56628614	56627145	56627581	-	14	D6_rep1
Chr3	56627036	56628614	56627145	56627581	-	15	D6_rep2
Chr3	113788712	113789840	113788875	113789731	+	3	D6_rep1
Chr3	113788712	113789840	113788875	113789731	+	7	D6_rep2
Chr3	128806371	128807671	128806590	128807542	+	2	D0_rep1
Chr3	128806371	128807671	128806590	128807542	+	6	D3_rep1
Chr3	128806371	128807671	128806590	128807542	+	6	D3_rep2
Chr3	128806371	128807671	128806590	128807542	+	6	D6_rep1
Chr3	128806371	128807671	128806590	128807542	+	16	D0_rep2
Chr3	128806371	128807671	128806590	128807542	+	20	D6_rep2
Chr3	160413472	160414517	160413613	160414366	+	1	D0_rep1
Chr3	160413472	160414517	160413613	160414366	+	1	D3_rep1
Chr3	160413472	160414517	160413613	160414366	+	4	D0_rep2
Chr3	160413472	160414517	160413613	160414366	+	11	D6_rep1
Chr3	160413472	160414517	160413613	160414366	+	15	D6_rep2
Chr3	160413472	160414517	160413613	160414366	+	17	D3_rep2
Chr3	195688532	195689438	195688797	195689338	+	3	D3_rep1
Chr3	195688532	195689438	195688797	195689338	+	3	D6_rep1
Chr3	195688532	195689438	195688797	195689338	+	6	D3_rep2
Chr3	195688532	195689438	195688797	195689338	+	13	D6_rep2
Chr4	17814852	17815358	17814998	17815273	+	1	D0_rep1
Chr4	17814852	17815358	17814998	17815273	+	1	D6_rep2
Chr4	17814852	17815358	17814998	17815273	+	2	D0_rep2
Chr4	17814852	17815358	17814998	17815273	+	2	D6_rep1
Chr4	53382277	53383876	53382335	53383772	+	6	D6_rep1
Chr4	53382277	53383876	53382335	53383772	+	6	D6_rep2
Chr4	143543508	143543972	143543657	143543852	+	1	D6_rep1
Chr4	143543508	143543972	143543657	143543852	+	3	D6_rep2
Chr5	618989	620261	619117	620068	+	1	D0_rep1
Chr5	618989	620261	619117	620068	+	1	D6_rep1
Chr5	618989	620261	619117	620068	+	11	D6_rep2
Chr5	618989	620261	619117	620068	+	15	D0_rep2
Chr5	43161248	43161931	43161613	43161708	+	7	D6_rep1
Chr5	43161248	43161931	43161613	43161708	+	10	D6_rep2
Chr5	71548681	71549606	71548745	71549419	+	1	D6_rep1
Chr5	71548681	71549606	71548745	71549419	+	2	D6_rep2
Chr5	129526283	129528677	129526456	129527747	+	7	D3_rep1
Chr5	129526283	129528677	129526456	129527747	+	88	D3_rep2
Chr5	134535857	134538083	134535915	134537988	+	2	D6_rep1
Chr5	134535857	134538083	134535915	134537988	+	6	D6_rep2
Chr5	139278326	139279129	139278408	139278564	+	1	D6_rep2
Chr5	139278326	139279129	139278408	139279050	+	4	D0_rep1
Chr5	139278326	139279129	139278408	139278564	+	5	D6_rep1
Chr5	139278326	139279129	139278740	139279050	+	8	D0_rep2
Chr5	139363758	139364743	139363922	139364563	+	1	D6_rep1
Chr5	139363758	139364743	139363922	139364563	+	10	D6_rep2
Chr5	168488601	168494650	168494002	168494549	+	4	D6_rep1
Chr5	168488601	168494650	168494002	168494549	+	30	D6_rep2
Chr5	168683965	168685927	168684096	168685686	-	2	D6_rep1
Chr5	168683965	168685927	168684096	168685686	-	3	D6_rep2
Chr5	176322272	176324757	176322425	176324628	+	1	D6_rep1
Chr5	176322272	176324757	176322425	176324628	+	9	D6_rep2
Chr6	18212487	18213781	18212604	18213655	+	2	D6_rep2
Chr6	18212487	18213781	18212604	18213655	+	3	D6_rep1
Chr6	18236451	18258405	18236596	18237380	-	1	D3_rep1
Chr6	18236451	18258405	18236596	18237380	-	1	D3_rep2
Chr6	34821652	34821955	34821815	34821916	+	1	D3_rep1
Chr6	34821652	34821955	34821815	34821916	+	1	D6_rep2
Chr6	34821652	34821955	34821815	34821916	+	2	D6_rep1
Chr6	34821652	34821955	34821815	34821916	+	4	D3_rep2
Chr6	43024984	43026141	43025132	43025262	+	1	D6_rep1
Chr6	43024984	43026141	43025132	43025262	+	1	D6_rep2
Chr6	73466208	73466606	73466408	73466488	+	1	D6_rep1
Chr6	73466208	73466606	73466408	73466488	+	2	D6_rep2
Chr7	770470	775162	774198	775005	+	4	D0_rep1
Chr7	770470	775162	774198	775005	+	6	D6_rep1
Chr7	770470	775162	774198	775005	+	6	D6_rep2
Chr7	770470	775162	774198	775005	+	10	D0_rep2
Chr7	2229983	2230727	2230143	2230548	-	1	D3_rep1
Chr7	2229983	2230727	2230143	2230548	-	3	D3_rep2
Chr7	5739275	5741815	5739352	5740972	-	2	D6_rep1
Chr7	5739275	5741815	5739352	5740972	-	3	D3_rep1
Chr7	5739275	5741815	5739352	5740972	-	4	D3_rep2
Chr7	5739275	5741815	5739352	5740972	-	18	D6_rep2
Chr7	6432836	6436533	6435020	6436361	-	2	D6_rep1
Chr7	6432836	6436533	6432959	6436361	-	2	D6_rep2
Chr7	8157115	8158652	8157214	8158526	-	2	D6_rep1
Chr7	8157115	8158652	8157214	8158526	-	2	D6_rep2
Chr7	8157115	8235940	8157214	8158526	-	1	D6_rep1
Chr7	8157115	8235940	8157214	8158526	-	1	D6_rep2
Chr7	8157115	8236005	8157214	8158526	-	1	D6_rep1
Chr7	8157115	8236005	8157214	8158526	-	6	D6_rep2
Chr7	27785162	27785489	27785311	27785398	+	1	D6_rep2
Chr7	27785162	27785489	27785311	27785398	+	5	D6_rep1
Chr7	35831491	35832900	35831496	35832797	+	1	D6_rep2
Chr7	35831491	35832900	35831496	35832797	+	2	D6_rep1
Chr7	40078004	40078851	40078121	40078719	+	1	D3_rep1
Chr7	40078004	40078851	40078121	40078719	+	6	D3_rep2
Chr7	43639448	43640649	43639681	43640572	-	6	D0_rep1
Chr7	43639448	43640649	43639681	43640572	-	11	D0_rep2
Chr7	43986191	43986677	43986312	43986600	-	1	D0_rep1
Chr7	43986191	43986677	43986312	43986600	-	2	D3_rep1
Chr7	43986191	43986677	43986312	43986600	-	2	D3_rep2
Chr7	43986191	43986677	43986312	43986600	-	8	D0_rep2
Chr7	44674410	44675268	44674557	44675177	+	2	D3_rep2
Chr7	44674410	44675268	44674557	44675177	+	4	D3_rep1
Chr7	64336258	64336982	64336385	64336886	+	3	D6_rep1
Chr7	64336258	64336982	64336385	64336886	+	5	D6_rep2
Chr7	64543706	64544432	64543802	64544305	-	18	D3_rep1
Chr7	64543706	64544432	64543802	64544305	-	27	D0_rep1
Chr7	64543706	64544432	64543802	64544305	-	34	D6_rep2
Chr7	64543706	64544432	64543802	64544305	-	35	D6_rep1
Chr7	64543706	64544432	64543802	64544305	-	38	D0_rep2
Chr7	64543706	64544432	64543802	64544305	-	59	D3_rep2
Chr7	65387901	65388901	65388028	65388805	+	1	D3_rep1
Chr7	65387901	65388901	65388028	65388805	+	6	D3_rep2
Chr7	66127703	66134374	66127740	66130126	+	3	D6_rep1
Chr7	66127703	66134374	66130842	66134279	+	3	D6_rep2
Chr7	66352504	66356871	66352555	66356824	+	7	D6_rep1
Chr7	66352504	66356871	66352555	66356824	+	16	D6_rep2
Chr7	72928384	72930111	72928465	72929939	+	2	D6_rep1
Chr7	72928384	72930111	72928465	72929939	+	5	D6_rep2
Chr7	74096621	74097189	74096760	74097079	+	13	D0_rep2
Chr7	74096621	74097189	74096760	74097079	+	14	D3_rep1
Chr7	74096621	74097189	74096760	74097079	+	22	D0_rep1
Chr7	74096621	74097189	74096760	74097079	+	28	D3_rep2
Chr7	74096621	74097189	74096760	74097079	+	41	D6_rep2
Chr7	74096621	74097189	74096760	74097079	+	43	D6_rep1
Chr7	74756819	74758000	74756861	74757958	+	2	D3_rep2
Chr7	74756819	74758000	74756861	74757958	+	3	D0_rep1
Chr7	74756819	74758000	74756861	74757958	+	3	D0_rep2
Chr7	74756819	74758000	74756861	74757958	+	3	D3_rep1
Chr7	97969004	97969845	97969052	97969769	-	1	D3_rep2
Chr7	97969004	97969845	97969052	97969769	-	2	D3_rep1
Chr7	98933240	98935675	98933402	98935578	+	2	D0_rep1
Chr7	98933240	98935675	98933402	98935578	+	3	D3_rep1
Chr7	98933240	98935675	98933402	98935578	+	4	D0_rep2
Chr7	98933240	98935675	98933402	98935578	+	4	D6_rep1
Chr7	98933240	98935675	98933402	98935578	+	5	D3_rep2
Chr7	98933240	98935675	98933402	98935578	+	19	D6_rep2
Chr7	99390892	99391253	99391099	99391177	+	2	D6_rep2
Chr7	99390892	99391253	99391099	99391177	+	3	D0_rep2
Chr7	99390892	99391253	99391099	99391177	+	3	D3_rep1
Chr7	99390892	99391253	99391099	99391177	+	3	D6_rep1
Chr7	99390892	99391253	99391099	99391177	+	5	D0_rep1
Chr7	99390892	99391253	99391099	99391177	+	5	D3_rep2
Chr7	100023418	100024307	100023932	100024153	+	1	D0_rep1
Chr7	100023418	100024307	100023461	100023551	+	10	D3_rep1
Chr7	100023418	100024307	100023461	100023551	+	16	D0_rep2
Chr7	100023418	100024307	100023461	100023551	+	17	D6_rep1
Chr7	100023418	100024307	100023461	100023551	+	24	D3_rep2
Chr7	100023418	100024307	100023461	100023551	+	30	D6_rep2
Chr7	100102674	100102960	100102781	100102863	+	1	D0_rep1
Chr7	100102674	100102960	100102781	100102863	+	4	D0_rep2
Chr7	100111727	100112253	100111999	100112107	-	1	D6_rep2
Chr7	100111727	100112253	100111829	100111921	-	2	D6_rep1
Chr7	128335542	128336042	128335679	128335846	-	1	D0_rep1
Chr7	128335542	128336042	128335679	128335846	-	1	D0_rep2
Chr7	149018991	149021147	149019197	149020966	-	1	D3_rep1
Chr7	149018991	149021147	149019197	149020966	-	7	D3_rep2
Chr7	156966269	156967092	156966402	156966960	+	3	D0_rep1
Chr7	156966269	156967092	156966402	156966960	+	3	D0_rep2
Chr7	156966269	156967092	156966402	156966960	+	3	D6_rep1
Chr7	156966269	156967092	156966402	156966960	+	4	D6_rep2
Chr7	158735502	158739121	158737179	158739022	-	1	D6_rep1
Chr7	158735502	158739121	158737179	158739022	-	1	D6_rep2
Chr8	18011236	18011827	18011366	18011666	+	5	D0_rep1
Chr8	18011236	18011827	18011366	18011666	+	11	D3_rep1
Chr8	18011236	18011827	18011366	18011666	+	12	D0_rep2
Chr8	18011236	18011827	18011366	18011666	+	12	D3_rep2
Chr8	18011236	18011827	18011366	18011666	+	22	D6_rep1
Chr8	18011236	18011827	18011366	18011666	+	36	D6_rep2
Chr8	43059091	43064215	43059177	43064100	+	3	D3_rep1
Chr8	43059091	43064215	43059177	43064100	+	9	D3_rep2
Chr8	43059091	43083180	43077364	43083117	+	1	D6_rep1
Chr8	43059091	43083180	43077364	43083117	+	1	D6_rep2
Chr8	47927193	47927890	47927353	47927770	-	2	D6_rep1
Chr8	47927193	47927890	47927353	47927770	-	2	D6_rep2
Chr8	61680967	61684188	61681036	61682438	-	3	D0_rep1
Chr8	61680967	61684188	61681036	61682438	-	5	D0_rep2
Chr8	61680967	61684188	61681036	61682438	-	10	D6_rep2
Chr8	61680967	61684188	61681036	61682438	-	13	D6_rep1
Chr8	70159504	70162854	70159652	70162710	-	1	D6_rep2
Chr8	70159504	70162854	70159652	70162710	-	4	D6_rep1
Chr8	94537102	94538346	94537151	94538259	-	5	D3_rep1
Chr8	94537102	94538346	94537151	94538259	-	6	D6_rep1
Chr8	94537102	94538346	94537151	94538259	-	18	D3_rep2
Chr8	94537102	94538346	94537151	94538259	-	25	D6_rep2
Chr8	125008970	125009343	125009084	125009171	+	2	D6_rep2
Chr8	125008970	125009343	125009084	125009171	+	3	D6_rep1
Chr8	130358016	130361771	130358143	130361669	-	2	D0_rep1
Chr8	130358016	130361771	130358143	130361669	-	2	D3_rep1
Chr8	130358016	130361771	130358143	130361669	-	3	D0_rep2
Chr8	130358016	130361771	130358143	130361669	-	6	D6_rep1
Chr8	130358016	130361771	130358143	130361669	-	24	D3_rep2
Chr8	130358016	130361771	130358143	130361669	-	38	D6_rep2
Chr9	14639895	14680162	14674385	14680032	-	1	D3_rep1
Chr9	14639895	14680162	14674385	14680032	-	1	D3_rep2
Chr9	17415787	17416189	17415881	17415965	+	1	D3_rep1
Chr9	17415787	17416189	17415881	17415965	+	1	D3_rep2
Chr9	33971650	33973237	33971754	33973182	-	1	D0_rep1
Chr9	33971650	33973237	33971754	33973182	-	4	D0_rep2
Chr9	33971650	33973237	33971754	33973182	-	4	D3_rep1
Chr9	33971650	33973237	33971754	33973182	-	4	D6_rep1
Chr9	33971650	33973237	33971754	33973182	-	11	D3_rep2
Chr9	33971650	33973237	33971754	33973182	-	37	D6_rep2
Chr9	77238001	77238386	77238191	77238271	+	2	D3_rep1
Chr9	77238001	77238386	77238191	77238271	+	2	D6_rep1
Chr9	77238001	77238386	77238191	77238271	+	6	D6_rep2
Chr9	77238001	77238386	77238191	77238271	+	9	D3_rep2
Chr9	92855810	92856318	92855903	92856191	-	3	D3_rep1
Chr9	92855810	92856318	92855903	92856191	-	5	D3_rep2
Chr9	94923985	94928531	94924175	94928424	+	1	D6_rep1
Chr9	94923985	94928531	94924175	94928424	+	1	D6_rep2
Chr9	111533738	111534353	111533865	111534260	+	1	D3_rep1
Chr9	111533738	111534353	111533865	111534260	+	10	D6_rep1
Chr9	111533738	111534353	111533865	111534260	+	19	D6_rep2
Chr9	111533738	111534353	111533865	111534260	+	22	D3_rep2
Chr9	122280442	122291840	122285287	122285779	+	2	D6_rep1
Chr9	122280442	122291840	122285287	122285779	+	2	D6_rep2
Chr9	122285168	122291840	122285287	122285779	+	1	D0_rep1
Chr9	122285168	122291840	122285287	122285779	+	4	D0_rep2
Chr9	124899328	124900547	124899478	124900451	-	2	D0_rep1
Chr9	124899328	124900547	124899478	124900451	-	2	D0_rep2
Chr9	124921128	124923223	124921240	124921722	-	1	D0_rep2
Chr9	124921128	124923223	124921240	124921722	-	2	D0_rep1
Chr9	124921128	124923223	124921240	124921722	-	2	D6_rep1
Chr9	124921128	124923223	124921240	124921722	-	5	D6_rep2
Chr9	127344234	127345477	127344339	127345402	+	2	D6_rep1
Chr9	127344234	127345477	127344339	127345402	+	10	D6_rep2
Chr9	127925106	127925979	127925260	127925866	-	2	D6_rep1
Chr9	127925106	127925979	127925260	127925866	-	5	D0_rep1
Chr9	127925106	127925979	127925260	127925866	-	6	D3_rep1
Chr9	127925106	127925979	127925260	127925866	-	15	D6_rep2
Chr9	127925106	127925979	127925260	127925866	-	21	D0_rep2
Chr9	127925106	127925979	127925260	127925866	-	23	D3_rep2
Chr9	131436619	131439061	131436722	131438988	+	7	D0_rep2
Chr9	131436619	131439061	131436722	131438988	+	8	D0_rep1
Chr9	131506113	131506453	131506220	131506402	+	1	D3_rep1
Chr9	131506113	131506453	131506220	131506402	+	8	D0_rep1
Chr9	131506113	131506453	131506220	131506402	+	9	D6_rep1
Chr9	131506113	131506453	131506220	131506402	+	9	D6_rep2
Chr9	131506113	131506453	131506220	131506402	+	11	D3_rep2
Chr9	131506113	131506453	131506220	131506402	+	16	D0_rep2
Chr9	133412298	133412921	133412492	133412777	-	3	D0_rep1
Chr9	133412298	133412921	133412492	133412777	-	4	D3_rep2
Chr9	133412298	133412921	133412492	133412777	-	5	D3_rep1
Chr9	133412298	133412921	133412492	133412777	-	7	D6_rep1
Chr9	133412298	133412921	133412492	133412777	-	9	D0_rep2
Chr9	133412298	133412921	133412492	133412777	-	19	D6_rep2
Chr9	135866455	135883078	135881794	135882815	-	4	D6_rep1
Chr9	135866455	135883078	135881794	135882815	-	7	D6_rep2
Chr9	135881632	135883078	135881794	135882815	-	84	D0_rep1
Chr9	135881632	135883078	135881794	135882815	-	111	D3_rep1
Chr9	135881632	135883078	135881794	135882815	-	200	D6_rep1
Chr9	135881632	135883078	135881794	135882815	-	252	D3_rep2
Chr9	135881632	135883078	135881794	135882815	-	371	D6_rep2
Chr9	135881632	135883078	135881794	135882815	-	400	D0_rep2
Chr9	137564433	137565154	137564606	137564892	-	2	D3_rep1
Chr9	137564433	137565154	137564606	137564892	-	3	D0_rep1
Chr9	137564433	137565154	137564958	137565084	-	3	D3_rep2
Chr9	137564433	137565154	137564606	137564892	-	8	D0_rep2
Chr9	137564433	137565154	137564606	137564892	-	10	D6_rep1
Chr9	137564433	137565154	137564606	137564892	-	18	D6_rep2
ChrX	3818441	3826729	3825231	3826600	-	2	D6_rep1
ChrX	3818441	3826729	3825231	3826600	-	4	D6_rep2
ChrX	3822072	3826729	3825231	3826600	-	3	D3_rep1
ChrX	3822072	3826729	3825231	3826600	-	8	D3_rep2
ChrX	71423116	71424238	71423239	71423973	+	1	D3_rep1
ChrX	71423116	71424238	71423239	71423973	+	3	D3_rep2
ChrX	71423116	71424238	71423239	71423973	+	4	D0_rep1
ChrX	71423116	71424238	71423239	71423973	+	6	D0_rep2
ChrX	71544566	71548023	71544635	71547906	+	1	D6_rep2
ChrX	71544566	71548023	71544635	71547906	+	2	D6_rep1
ChrX	80809012	80809304	80809042	80809245	-	3	D0_rep1
ChrX	80809012	80809304	80809042	80809245	-	8	D3_rep1
ChrX	80809012	80809304	80809042	80809245	-	9	D6_rep2
ChrX	80809012	80809304	80809042	80809245	-	12	D6_rep1
ChrX	80809012	80809304	80809042	80809245	-	17	D0_rep2
ChrX	80809012	80809304	80809042	80809245	-	18	D3_rep2
ChrX	150814861	150816078	150814936	150816006	-	1	D6_rep2
ChrX	150814861	150816078	150814936	150816006	-	9	D6_rep1
ChrX	154413206	154413567	154413358	154413481	+	1	D6_rep1
ChrX	154413206	154413567	154413358	154413481	+	2	D6_rep2

## Sheet: Table S9B. SH_SY5Y_gene_counts
Supplemental Table S9B: Gene counts during SH-SY5Y differentiation
gene_id	D0_rep1	D0_rep2	D3_rep1	D3_rep2	D6_rep1	D6_rep2
ENSG00000000003.15	202	271	207	256	184	192
ENSG00000000005.6	0	0	0	0	0	0
ENSG00000000419.12	318	526	283	377	303	206
ENSG00000000457.14	206	248	241	225	237	252
ENSG00000000460.17	335	608	333	328	186	266
ENSG00000000938.13	1	0	0	0	0	0
ENSG00000000971.16	1	0	0	3	1	2
ENSG00000001036.14	249	286	290	351	334	328
ENSG00000001084.13	513	499	420	424	402	271
ENSG00000001167.14	833	957	927	873	895	892
ENSG00000001460.18	174	113	108	123	135	192
ENSG00000001461.17	313	141	142	158	171	247
ENSG00000001497.16	854	1051	562	686	549	713
ENSG00000001561.7	0	0	0	3	0	0
ENSG00000001617.12	82	43	26	33	58	55
ENSG00000001626.16	0	0	0	0	0	0
ENSG00000001629.10	1401	1176	1499	1374	1481	964
ENSG00000001630.17	935.5	703	937.52	875.96	648	904
ENSG00000001631.15	700.56	572.16	623.56	411.86	509.49	235.59
ENSG00000002016.18	227	126	108.16	79	102	100
ENSG00000002079.14	0	0	0	0	0	0
ENSG00000002330.13	214	403	521	708	507	916
ENSG00000002549.12	524	588	378	437	371	346
ENSG00000002586.20	259	206	157	162	201.5	166
ENSG00000002586.20_PAR_Y	259	206	157	162	201.5	166
ENSG00000002587.10	0	0	0	0	0	0
ENSG00000002726.20	0	2	0	9	2	8
ENSG00000002745.13	20	3	3	8	2	0
ENSG00000002746.15	0	0	0	0	0	0
ENSG00000002822.15	540.46	724.54	636.47	710.83	534.26	834.18
ENSG00000002834.18	902	1462	1480	1995	1491	2092
ENSG00000002919.14	265	454	364	504	352	538
ENSG00000002933.9	2	0	1	2	3	0
ENSG00000003056.8	1214	1410	1166	1560	1220	1550
ENSG00000003096.14	1569	1817	2358	2376	2325	1737
ENSG00000003137.8	0	1	25812	31988	38805	36962
ENSG00000003147.19	2428	2599	992	1565	763	2038
ENSG00000003249.14	802	924	628	693	628	890
ENSG00000003393.15	488	612	640	701	610	601
ENSG00000003400.15	0	0	0	0	1	2
ENSG00000003402.20	178	139	281	256	274	193
ENSG00000003436.16	3	1	3	2	5	3
ENSG00000003509.16	323	267	318	289	280	227
ENSG00000003756.17	1299.94	1285	2033	2036	1892.83	1938.9
ENSG00000003987.14	192	191	153	158	127	107
ENSG00000003989.18	190	143	50	85	79	56
ENSG00000004059.11	2293	2996.97	2553	3723.96	2277.98	4233
ENSG00000004139.14	1492.95	1843.6	2515	2604	2282.71	3034
ENSG00000004142.12	1067	1440	1098	1501	989	1456
ENSG00000004399.12	345	189	109	128	78	138
ENSG00000004455.17	1244	1800	1027	1286	937	1316
ENSG00000004468.13	25	23	23	8	5	3
ENSG00000004478.8	2874	4528	1474	1938	1377	2791
ENSG00000004487.17	4798	4526	2085	2278	1627	1957
ENSG00000004534.15	2043.06	2141	1432	1428	1269.17	977.1
ENSG00000004660.15	173	205	102	122	106	142
ENSG00000004700.16	429	525	491	484	467	225
ENSG00000004766.17	363	356	347	315	379	150
ENSG00000004776.13	3	3	4	4	8	8
ENSG00000004777.18	535	535	564	435	477	466
ENSG00000004779.10	639	934	441	709	392	705
ENSG00000004799.8	96	13	15	6	9	9
ENSG00000004809.14	1	0	0	0	0	0
ENSG00000004838.14	28	30	42	29	38	33
ENSG00000004846.16	0	0	0	0	0	0
ENSG00000004848.8	2	5	0	0	0	0
ENSG00000004864.14	967	1370	1046	1109	1040	993
ENSG00000004866.20	327	305	272	322	312	346
ENSG00000004897.12	1084	1229	935	948	910	507
ENSG00000004939.15	2	0	0	0	0	0
ENSG00000004948.15	0	0	0	0	1	0
ENSG00000004961.15	187	238	183	227	200	251
ENSG00000004975.12	854	1110	1009	1209	888	1461
ENSG00000005001.10	6	1	2	0	2	1
ENSG00000005007.13	1682	2333	1780	2196	1587	2149
ENSG00000005020.13	34	18	55	31	45	21
ENSG00000005022.6	3454	3573	2000	2758	1654	3056
ENSG00000005059.16	204	191	60	67	31	35
ENSG00000005073.6	0	0	0	0	0	0
ENSG00000005075.15	511.19	1138.2	554.05	1005.54	545.5	1040.42
ENSG00000005100.13	827	1220	545	732	540	585
ENSG00000005102.14	0	0	0	0	0	0
ENSG00000005108.16	756	954	1072	609	584	285
ENSG00000005156.12	1071	1001	670	608	642	695
ENSG00000005175.10	284	389	310	302	293	133
ENSG00000005187.12	23	25	26	25	19	15
ENSG00000005189.19	258	259	152	168	101	204
ENSG00000005194.15	627	914	637	799	741	915
ENSG00000005206.17	754	912	907	943	899	839
ENSG00000005238.19	191	173	365	442	379	517
ENSG00000005243.10	19	16	14	24	20	33
ENSG00000005249.13	843	877	1376	1652	1692	978
ENSG00000005302.19	402	437	525	537	606	380
ENSG00000005339.15	1132	1782	2314	1979	2036	1993
ENSG00000005379.17	328	255	335	420	432	585
ENSG00000005381.8	0	0	0	0	0	0
ENSG00000005421.9	0	2	2	6	2	2
ENSG00000005436.14	264	143	100	103	86	44
ENSG00000005448.17	519	558	477	571	417	723
ENSG00000005469.12	139	168	240	200	286	172
ENSG00000005471.18	171	106	44	43	51	30
ENSG00000005483.21	1284	1414	1564	1325	1523	1034
ENSG00000005486.17	1000	990	2105	2233	2048	2962
ENSG00000005513.10	0	0	0	0	0	0
ENSG00000005700.15	624	606	558	503	673	186
ENSG00000005801.18	672	833	937	645	882	272
ENSG00000005810.18	941	978	708	619	739	512
ENSG00000005812.11	288	265	399	431	356	261
ENSG00000005844.18	2	1	0	0	1	8
ENSG00000005882.12	451	489	673	734	677	979
ENSG00000005884.18	267	191	240	333	507	397
ENSG00000005889.15	334	348	546	398	506	206
ENSG00000005893.16	428	299	360	357	367	314
ENSG00000005961.19	56	27	33	42	45	45
ENSG00000005981.13	0	0	0	0	0	0
ENSG00000006007.12	534	544	616	631	760	785
ENSG00000006015.17	424	754	660	877	645	883
ENSG00000006016.11	26	56	37	51	41	40
ENSG00000006025.12	401	308	351	327	374	334
ENSG00000006042.12	808	1266	1345	1542	1197	1550
ENSG00000006047.13	406	469	765	787	711	991
ENSG00000006059.4	0	0	0	0	0	0
ENSG00000006062.17	99	141	144	173	163	164
ENSG00000006071.15	90	49	47	45	45	62
ENSG00000006116.4	0	0	0	0	0	0
ENSG00000006118.14	2943	3682	3125	3574	2635	3150
ENSG00000006125.18	3366	3418	4320	4265	5482	5631
ENSG00000006128.12	0	0	0	0	0	0
ENSG00000006194.10	439	502	441	619	387	675
ENSG00000006210.7	129	267	172	180	188	183
ENSG00000006282.21	728	612	836	1054	972	1136
ENSG00000006283.18	767	237	75	102	72	163
ENSG00000006327.14	87	80	71	178	196	215
ENSG00000006377.11	195	133	105	83	79	67
ENSG00000006432.15	513	503	664	557	659	862
ENSG00000006451.8	1016	1289	1024	1190	1022	905
ENSG00000006453.14	335	270	87	110	92	114
ENSG00000006459.11	911	506	535	433	559	280
ENSG00000006468.14	182	215	138	258	79	200
ENSG00000006530.18	639	654	415	555	418	438
ENSG00000006534.16	31	26	13	31	30	34
ENSG00000006555.11	0	0	0	0	1	0
ENSG00000006576.16	743	650	633	554	494	263
ENSG00000006606.8	0	0	0	0	0	0
ENSG00000006607.14	558	672	613	683	588	694
ENSG00000006611.16	0	0	0	5	0	5
ENSG00000006625.18	723.63	1290	669	1130.06	593	529
ENSG00000006634.8	730	784	406	407	283.97	175
ENSG00000006638.13	48	24	63	29	56	44
ENSG00000006652.14	1152	800	636	764	592	479
ENSG00000006659.13	0	0	0	0	0	0
ENSG00000006695.12	260.02	189.1	110.55	165.02	161.12	178
ENSG00000006704.10	999	1030	891	933	790	1097
ENSG00000006712.15	475	815	708	821	614	953
ENSG00000006715.16	1083	1047	1146	1282	1412	980
ENSG00000006740.17	1	5	4	2	8	7
ENSG00000006744.19	1018	1248	713	799	664	986
ENSG00000006747.15	0	0	0	3	0	0
ENSG00000006756.16	142	182	388	427	412	483
ENSG00000006757.12	17	25	23	39	21	47
ENSG00000006788.14	0	0	0	0	0	0
ENSG00000006831.10	779	969	996	1193	828	1133
ENSG00000006837.12	20.37	19.66	12.91	26.26	29.45	15.03
ENSG00000007001.13	4	0	0	0	0	2
ENSG00000007038.11	0	0	0	1	0	1
ENSG00000007047.15	1085	739	913	901	906	1247
ENSG00000007062.11	14	7	1	0	0	0
ENSG00000007080.11	841	1392	666	909	605	1118
ENSG00000007129.18	0	0	0	0	0	0
ENSG00000007168.13	1816.19	2073	2779.57	2537	2735	1797
ENSG00000007171.18	58	77	54	52	40	51
ENSG00000007174.18	4	6	15	12	17	38
ENSG00000007202.15	2342	2638	2352	2429	2033	2940
ENSG00000007216.15	0	0	0	0	0	0
ENSG00000007237.18	54	83	185	270	165	242
ENSG00000007255.10	143	133	112	253	114	239
ENSG00000007264.15	0	0	0	1	0	1
ENSG00000007306.15	0	0	0	0	0	0
ENSG00000007312.13	1	0	0	0	0	0
ENSG00000007314.12	4	0	0	0	0	0
ENSG00000007341.19	154	128	115	154	134	179
ENSG00000007350.17	1	1	0	3	0	0
ENSG00000007372.23	25	32	15	23	23	15
ENSG00000007376.8	262	707	442	604	378	537
ENSG00000007384.15	38	11	132	123	258	193
ENSG00000007392.16	1794	1491	1348	1426	1282	1050
ENSG00000007402.11	1557	2452	6464	7262	4629	8400
ENSG00000007516.14	14	12	64	51	74	90
ENSG00000007520.4	506	683	613	755	641	862
ENSG00000007541.17	634	1105.93	1239.57	1202.97	1380.88	1414.38
ENSG00000007545.16	442.04	627.1	511.65	476.06	500.01	551.95
ENSG00000007866.21	282	150	287	294	292	347
ENSG00000007908.16	0	0	0	0	0	0
ENSG00000007923.16	785	1276	986	1045	915	1042
ENSG00000007933.13	0	0	0	0	0	3
ENSG00000007944.15	172	82	44	33	85	33
ENSG00000007952.18	0	2	0	0	1	0
ENSG00000007968.7	366	1003	544	552	198	550
ENSG00000008018.9	1263	1813	1143	1731	972	1406
ENSG00000008056.14	524.69	290	716	465.88	598	709.2
ENSG00000008083.14	515	741	684	870	740	802
ENSG00000008086.13	280	230	845	653	801	542
ENSG00000008118.10	0	0	2	0	3	5
ENSG00000008128.23	426.57	744.33	535.45	656.73	577.09	517.89
ENSG00000008130.15	756	981	864	944	756	1058
ENSG00000008196.13	7611	7448	4421	3987	2828	3354
ENSG00000008197.5	1	1	0	1	0	3
ENSG00000008226.20	24	29	31	36	32	19
ENSG00000008256.16	713	726	914	1236	1498	1315
ENSG00000008277.14	2590	2451	3083	2688	3730	1824
ENSG00000008282.8	251	264	178	251	244	158
ENSG00000008283.16	967	3781	6309	7160	5198	6637
ENSG00000008294.21	3211	2828	2619	2276	2413	1752
ENSG00000008300.17	3023	3620	4060	4032	3683	5087
ENSG00000008311.15	66	54	50	49	58	33
ENSG00000008323.15	0	1	0	1	0	2
ENSG00000008324.11	153	208	186	212	110	139
ENSG00000008382.15	210	239	291	360	340	445
ENSG00000008394.13	15	28	6	18	2	3
ENSG00000008405.12	321	306	327	373	298	244
ENSG00000008438.5	0	0	1	0	0	0
ENSG00000008441.16	665	550	489	428	556	615
ENSG00000008513.16	95	105	31	77	52	65
ENSG00000008516.17	3	8	13	2	8	10
ENSG00000008517.17	0	4	1	0	15	1
ENSG00000008710.20	5277.87	4829.99	5742.37	6129.59	5701.52	7989.87
ENSG00000008735.14	1628	1892	2469	2345	2410	3210
ENSG00000008838.20	1406	1446	1255	1093	1102	1468
ENSG00000008853.17	365	627	858	863	656	957
ENSG00000008869.12	1098	789	955	791	880	663
ENSG00000008952.17	894	887	1001	965	1103	444
ENSG00000008988.9	10640	8301	5942	7912	5326	7696
ENSG00000009307.16	6346	6416	4656	5175	4541	3300
ENSG00000009335.18	1055	1526	1167	1321	1198	950
ENSG00000009413.16	634	488	1225	1160	855	657
ENSG00000009694.13	20	23	85	67	39	76
ENSG00000009709.12	7	2	0	0	0	0
ENSG00000009724.17	28	21	34	45	46	18
ENSG00000009765.15	0	4	0	0	0	0
ENSG00000009780.15	126	77	95	62	76	90
ENSG00000009790.15	87	37	37	36	36	35
ENSG00000009830.11	580	842	821	907	701	906
ENSG00000009844.16	589	663	545	670	564	379
ENSG00000009950.16	47	16	20	24	21	29
ENSG00000009954.11	2238	4449	2987	2982	2418	2334
ENSG00000010017.13	563	489	638	599	579	387
ENSG00000010030.14	0	0	1	0	0	0
ENSG00000010072.16	268	286	230	200	234	170
ENSG00000010165.20	967	1575	967	1065	777	1282
ENSG00000010219.13	49	70	54	98	56	82
ENSG00000010244.18	2286	2509	2046.98	2083	1832	1426
ENSG00000010256.11	1623	2238	1338	1668	1199	1831
ENSG00000010270.13	742	861	767	897	732	801
ENSG00000010278.14	117	64	21	44	31	60
ENSG00000010282.15	1	1	0	0	0	0
ENSG00000010292.13	2959	2842	1676	1386	1150	1867
ENSG00000010295.19	230	339	317	317	297	342
ENSG00000010310.9	183	56	87	73	65	51
ENSG00000010318.21	111	66	52	55	66	66
ENSG00000010319.7	13	6	8	15	8	15
ENSG00000010322.16	1761	1966	2396	2467	2364	2977
ENSG00000010327.10	1	0	1	1	1	1
ENSG00000010361.14	679	805	476	674	453	808
ENSG00000010379.16	1	1	3	0	0	0
ENSG00000010404.18	2844.14	2550.63	5418.9	4851.16	4445.8	4334.33
ENSG00000010438.16	314	244	379	395	300	384
ENSG00000010539.11	149	193	235	254	211	194
ENSG00000010610.10	15	9	2	6	2	2
ENSG00000010626.15	131	107	71.89	92.23	81	117.27
ENSG00000010671.16	0	1	22	18	24	24
ENSG00000010704.18	0	0	0	0	0	0
ENSG00000010803.16	619	633	427	579	505	549
ENSG00000010810.17	852	910	995	1074	879	1164
ENSG00000010818.10	229	203	1171	1116	1039	784
ENSG00000010932.17	0	0	0	2	0	0
ENSG00000011007.12	958	1036	929	854	898	919
ENSG00000011009.11	1215	2051	1507	1926	1436	1987
ENSG00000011021.23	805	665	978	1075	908	1391
ENSG00000011028.14	2260	1584	2635	2939	2909	2752
ENSG00000011052.21	251.48	384.03	89.96	275.8	97.75	239.47
ENSG00000011083.9	0	0	0	0	0	0
ENSG00000011105.14	330	477	512	680	463	692
ENSG00000011114.15	580	618	646	502	623	414
ENSG00000011132.12	284	301	216	242	203	321
ENSG00000011143.17	271	312	214	276	241	339
ENSG00000011198.10	189	251	173	144	152	130
ENSG00000011201.12	13	6	0	0	0	0
ENSG00000011243.18	894	785	965	923	847	971
ENSG00000011258.16	1235	1186	989	1118	870	532
ENSG00000011260.14	909	1005	535	617	455	524
ENSG00000011275.18	1226	1350	1012	1279	917	1357
ENSG00000011295.16	632.17	535.27	507.09	593	520.15	394
ENSG00000011304.20	4850	7184	4107	5292	3384	4376
ENSG00000011332.19	154	456	290	364	169	334
ENSG00000011347.10	381	329	478	742	639	681
ENSG00000011376.12	396	565	375	469	360	471
ENSG00000011405.13	816	737	790	435	730	273
ENSG00000011422.12	105	310	183	150	94	162
ENSG00000011426.11	1139	1166	640	464	473	281
ENSG00000011451.21	1706	1878	1729	1769	1650	1938
ENSG00000011454.17	694	628	773	871	816	676
ENSG00000011465.17	3	1	16	66	19	46
ENSG00000011478.12	156	144	74	71	95	149
ENSG00000011485.15	1233	1907	997	1494	821	1503
ENSG00000011523.14	531	633	656	689	610	673
ENSG00000011566.15	449	374	525	498	581	283
ENSG00000011590.14	1	1	2	2	1	9
ENSG00000011600.12	0	0	0	0	0	0
ENSG00000011638.10	86	42	64	85	77	131
ENSG00000011677.13	63	48	101	78	115	147
ENSG00000012048.23	384	888	609	437	312	280
ENSG00000012061.16	895	1198	824	1074	859	1198
ENSG00000012124.17	0	0	0	0	0	2
ENSG00000012171.20	176	137	341	357	268	302
ENSG00000012174.12	678	708	767	677	876.29	692.52
ENSG00000012211.13	14	12	3	3	5	12
ENSG00000012223.13	0	0	0	1	0	0
ENSG00000012232.9	1561	1394	1584	1633	1698	2011
ENSG00000012504.15	0	0	0	0	0	0
ENSG00000012660.14	1293	1506	1479	1787	1250	1490
ENSG00000012779.11	4	0	0	1	1	0
ENSG00000012817.15	0	0	0	0	0	0
ENSG00000012822.16	963	682	963	1084	901	1385
ENSG00000012963.15	634	1103	777	949	656	957
ENSG00000012983.11	637	610	556	509	583	262
ENSG00000013016.16	370	392	474	515	433	699
ENSG00000013275.8	1320	1998	1640	1741	1426	2079
ENSG00000013288.9	244	233	338	343	393	467
ENSG00000013293.6	422	219	440	262	908	374
ENSG00000013297.12	0	4	4	1	25	6
ENSG00000013306.16	1404	1782	1110	1486	1194	1690
ENSG00000013364.19	172	24	49	136	278	151
ENSG00000013374.16	1189	1085	1076	1259	1041	1234
ENSG00000013375.16	583	620	676	621	588	309
ENSG00000013392.8	131	93	178	196	158	156
ENSG00000013441.16	733	554	817	957	746	400
ENSG00000013503.10	57	204	97	95	95	58
ENSG00000013523.11	378.57	391.48	262.81	290.35	275.4	383.65
ENSG00000013561.18	355	364	455	462	419	407
ENSG00000013563.14	96	170	273	274	333	334
ENSG00000013573.17	904.31	1310.22	639.3	656.03	392.97	507.42
ENSG00000013583.10	135	68	80	104	87	175
ENSG00000013588.9	14	3	25	35	40	22
ENSG00000013619.14	42	25	36	37	33	67
ENSG00000013725.14	11	5	1	6	3	5
ENSG00000013810.19	1516	2334	1356	1349	732	1160
ENSG00000014123.10	316	208	189	229	138	77
ENSG00000014138.9	379	976.95	462.72	468.05	248.68	520.77
ENSG00000014164.7	336	291	342	299	292	372
ENSG00000014216.16	1112	1181	1973	1857	2119	2307
ENSG00000014257.16	0	0	1	0	3	6
ENSG00000014641.20	1495	1627	1200	1432	982	1181
ENSG00000014824.14	1263	1216	1178	1189	1141	548
ENSG00000014914.21	27	7	35	20	31	11
ENSG00000014919.13	891.54	717	585.57	491.6	609.93	726.77
ENSG00000015133.19	284	401	286	305	167	342
ENSG00000015153.14	273	247	260	257	215	173
ENSG00000015171.19	571	786	779	836	758	619
ENSG00000015285.11	14	14	22	28	11	27
ENSG00000015413.9	0	0	0	4	0	0
ENSG00000015475.18	498	779	278	490	232	366
ENSG00000015479.19	3478.42	5221.57	4094.72	4538.66	4089.58	2354
ENSG00000015520.14	8	2	3	0	0	0
ENSG00000015532.10	401	373	320	332	314	338
ENSG00000015568.13	539.32	132.23	227.36	304.3	207.34	12.27
ENSG00000015592.16	465	464	461	840	553	1097
ENSG00000015676.18	1840	2403	2230	2816	1941	3655
ENSG00000016082.15	2958	2488	1906	2283	1231	2025
ENSG00000016391.11	56	96	33	48	25	52
ENSG00000016402.13	68	126	44	89	80	70
ENSG00000016490.16	0	0	0	0	0	0
ENSG00000016602.9	0	0	0	0	0	0
ENSG00000016864.18	625	609	563	643	587	527
ENSG00000017260.19	1176	1046	1000	973	900	720
ENSG00000017427.17	0	0	0	0	0	0
ENSG00000017483.15	5	6	3	3	6	7
ENSG00000017797.13	1242	1270	816	968	782	924
ENSG00000018189.13	1526	1002	2017	1582	2116	1124
ENSG00000018236.15	3073	2350	412	405	204	198
ENSG00000018280.17	2	0	4	8	5	7
ENSG00000018408.14	21	22	14	46	34	32
ENSG00000018510.16	860	910	1069	942	1067	666
ENSG00000018607.6	0	0	0	0	1	0
ENSG00000018610.15	254	339	291	341	293	362
ENSG00000018625.15	0	0	0	0	0	0
ENSG00000018699.13	326	287	216	219	225	154
ENSG00000018869.16	26	35	41	42	36	44
ENSG00000019102.12	0	1	6	0	0	1
ENSG00000019144.19	1357	1284	1273	1632	1561	1844
ENSG00000019169.10	0	0	0	0	0	0
ENSG00000019186.10	0	0	0	0	0	0
ENSG00000019485.13	102	200	291	274	323	346
ENSG00000019505.8	233	83	68	66	99	208
ENSG00000019549.13	32	58	98	58	226	52
ENSG00000019582.15	10	5	2	3	11	0
ENSG00000019991.18	248	218	92	203	241	103
ENSG00000019995.6	694.52	590.64	649.94	608.19	598.36	508.72
ENSG00000020129.16	615	1077	1036	1111	956	1288
ENSG00000020181.18	844	1062	646	984	824	1018
ENSG00000020219.9	1	1	0	0	0	0
ENSG00000020256.20	468	385	367	312	332	353
ENSG00000020426.11	186	164	73	113	92	60
ENSG00000020577.14	356	156	231	287	207	314
ENSG00000020633.18	7	2	1	0	0	2
ENSG00000020922.13	531	559	374	306	211	162
ENSG00000021300.14	37	17	30	31	54	107
ENSG00000021355.13	86	62	96	115	157	96
ENSG00000021461.17	0	1	0	0	0	0
ENSG00000021488.13	0	0	2	2	1	2
ENSG00000021574.12	618	643	816	713	696	425
ENSG00000021645.19	13	2	12	3	76	3
ENSG00000021762.20	39	35	45	67	93	152
ENSG00000021776.11	784	903	801	734	725	525
ENSG00000021826.17	16	6	8	12	21	17
ENSG00000021852.13	0	0	0	2	0	0
ENSG00000022267.19	1617	1403	1112	1458	1120	1420
ENSG00000022277.12	852	1077	682	1006	660	1059
ENSG00000022355.18	0	0	0	0	0	0
ENSG00000022556.16	0	0	0	0	0	0
ENSG00000022567.9	184	309	354	384	373	382
ENSG00000022840.16	1533	1286	1701	1565	1514	1919
ENSG00000022976.15	225	281	300	357	275	329
ENSG00000023041.11	222	419	292	335	238	228
ENSG00000023171.18	122	110	160	156	108	195
ENSG00000023191.17	603	827	721	878	880	1062
ENSG00000023228.14	986	1299	983	1027	1024	890
ENSG00000023287.13	875	613	690	604	609	354
ENSG00000023318.8	535	364	399	451	490	304
ENSG00000023330.15	339	345	381	365	300	490
ENSG00000023445.16	0	0	2	4	7	0
ENSG00000023516.9	834	704	846	636	883	433
ENSG00000023572.9	207	199	269	263	291	150
ENSG00000023608.5	293	222	166.96	193	189	99
ENSG00000023697.13	430	465	373	412	249	304
ENSG00000023734.11	2204	1728	1250	1263	1078	980
ENSG00000023839.12	17	13	5	4	7	3
ENSG00000023892.11	1	5	2	5	0	3
ENSG00000023902.14	561	1296	1106	1234	1009	1219
ENSG00000023909.10	156	138	180	167	191	126
ENSG00000024048.10	609	531	525	444	515	361
ENSG00000024422.12	29	49	53	108	115	111
ENSG00000024526.17	660	441	335	225	246	82
ENSG00000024862.17	156	113	85	97	91	96
ENSG00000025039.15	169	144	117	160	150	173
ENSG00000025156.13	601	527	445	403	387	381
ENSG00000025293.17	731	672	577	619	573	604
ENSG00000025423.11	63	29	22	27	14	17
ENSG00000025434.19	41	55	22	33	35	69
ENSG00000025708.14	109.68	100.11	200.23	204	231.02	224.4
ENSG00000025770.19	565	1179	878.09	1013	696	1148.63
ENSG00000025772.8	566	666	369	416	350	438
ENSG00000025796.14	1374	1066	1003	939	964	492
ENSG00000025800.14	1096	1043.79	1010	843	878	900
ENSG00000026025.16	3576	3921	1037	2959	4422	2204
ENSG00000026036.22	272.1	419.95	421.01	354.21	294.95	225.77
ENSG00000026103.22	15	16	11	2	26	10
ENSG00000026297.16	244	157.2	156	196	162	166
ENSG00000026508.19	48	32	3	7	105	3
ENSG00000026559.14	244	157	57	29	41	88
ENSG00000026652.15	548	457	581	609	521	785
ENSG00000026751.17	0	0	0	0	0	0
ENSG00000026950.17	362	250	162.72	146.2	189	195.25
ENSG00000027001.10	83	170	119	130	113	142
ENSG00000027075.15	54	38	345	396	264	152
ENSG00000027644.5	64	45	114	115	196	63
ENSG00000027697.15	373	260	334	344	307	237
ENSG00000027847.14	110	216	247	274	312	372
ENSG00000027869.11	0	0	0	0	0	0
ENSG00000028116.17	61	56	54	37	37	20
ENSG00000028137.19	19	6	3	3	3	4
ENSG00000028203.18	480	635	745	819	666	452
ENSG00000028277.21	64	113	75	90	71	104
ENSG00000028310.18	930	1047	814	912	762	796
ENSG00000028528.15	1408	1529	1517	1683	1476	1423
ENSG00000028839.10	347	399	333	341	300	212
ENSG00000029153.14	25	30	33	66	43	35
ENSG00000029363.17	1773.75	2952.02	2101.61	2041.57	1992.09	751
ENSG00000029364.12	1439	1196	1432	1494	1370	1554
ENSG00000029534.21	226	304	208	256	193	334
ENSG00000029559.7	0	0	0	0	0	0
ENSG00000029639.11	307.89	223.67	472.61	361.33	317.08	246.24
ENSG00000029725.17	693	898	824	753	752	400
ENSG00000029993.15	582	1390	933	1104	773	654
ENSG00000030066.13	1937	1876	1091	1030	906	742
ENSG00000030110.13	147	290	145	198	156	213
ENSG00000030304.14	0	0	1	0	0	0
ENSG00000030419.16	27	14	25	22	34	14
ENSG00000030582.18	1137	1005	1494	1835	1718	1977
ENSG00000031003.10	312	432	1062	1000	1103	695
ENSG00000031081.11	470	1082	1982	1822	1669	1388
ENSG00000031691.7	94	157	86	102	73	77
ENSG00000031698.13	1098	1251	921	1269	825	1542
ENSG00000031823.14	561	893	821	982	698	937
ENSG00000032219.19	290	323	400	307	369	144
ENSG00000032389.12	592	772	598	711	526	798
ENSG00000032444.16	1058	1066	1479	1354	1567	1682
ENSG00000032742.17	128	133	160	151	198	76
ENSG00000033011.13	170	298	241.12	313	262.64	332
ENSG00000033030.15	355	492	430	333	388	312
ENSG00000033050.9	715.85	1138.59	731.28	867.47	790.81	965.42
ENSG00000033100.16	607	772	1142	1380	1300	1289
ENSG00000033122.21	5	6	5	1	2	1
ENSG00000033170.17	260	201	245	221	224	182
ENSG00000033178.13	1018	665	866	677	946	314
ENSG00000033327.13	3273	2216	2228	2811	1791	3819
ENSG00000033627.16	1152	927	1419	1202	1439	1655
ENSG00000033800.13	624	644	495	445	450	250
ENSG00000033867.16	1091	721	833	948	625	350
ENSG00000034053.14	976	1473	1297	1575	1230	1890
ENSG00000034152.19	116	137	114	140	108	149
ENSG00000034239.11	10	6	19	8	21	7
ENSG00000034510.6	2607	5584	3081	4851	3178	6355
ENSG00000034533.11	78	90	86	94	71	69
ENSG00000034677.13	380	334	427	391	429	279
ENSG00000034693.15	81	91	70	90	77	40
ENSG00000034713.8	908	804	978	1152	973	1359
ENSG00000034971.17	0	0	0	1	0	0
ENSG00000035115.22	502	440	370	378	402	293
ENSG00000035141.8	475	760	502	652	452	502
ENSG00000035403.18	989	744	686	752	948	784
ENSG00000035499.13	366	375	218	191	119	109
ENSG00000035664.11	6	19	16	14	19	9
ENSG00000035681.9	295	399	316	346	262	324
ENSG00000035687.10	700	707	510	498	525	345
ENSG00000035720.8	2	0	0	0	0	0
ENSG00000035862.12	4755	4498	8158	7833	8952	10420
ENSG00000035928.16	904	1174	691	748	652	404
ENSG00000036054.13	339	262	268	223	310	109
ENSG00000036257.13	1240	878	966	862	852	523
ENSG00000036448.10	10	11	10	15	11	14
ENSG00000036473.8	0	1	0	1	0	0
ENSG00000036530.9	4	1	4	5	2	4
ENSG00000036549.13	586	523	487	463	477	177
ENSG00000036565.15	27	80	193	133	207	187
ENSG00000036672.16	47	46	27	21	39	45
ENSG00000036828.17	0	0	1	0	0	0
ENSG00000037042.9	216.5	143.88	161.04	150.85	187.44	151.09
ENSG00000037241.7	245.96	369	173.94	282	188	231.08
ENSG00000037280.16	5	1	0	1	1	8
ENSG00000037474.15	1199	1732	1026	1073	918	845
ENSG00000037637.11	291	406	449	438	382	476
ENSG00000037749.12	401	485	621	556	601	539
ENSG00000037757.14	434	424	380	428	402	411
ENSG00000037897.17	59	119	63	70	82	125
ENSG00000037965.6	11	8	9	9	31	12
ENSG00000038002.9	87	98	94	117	119	85
ENSG00000038210.14	78	145	51	73	45	30
ENSG00000038219.13	1260	1259	1045	860	1008	602
ENSG00000038274.17	702	853	673	714	621	590
ENSG00000038295.8	0	0	0	0	0	0
ENSG00000038358.15	1156.1	1707.89	1752.33	1895.32	1595.46	2027.41
ENSG00000038382.20	1677	2892	3735	4010	4329	3910
ENSG00000038427.16	413	511	2818	3288	2513	2928
ENSG00000038532.16	687	778	892	857	885	918
ENSG00000038945.15	0	0	0	0	0	0
ENSG00000039068.19	3	2	1	1	0	1
ENSG00000039123.16	997	822	508	515	491	216
ENSG00000039139.9	5	7	7	7	5	7
ENSG00000039319.17	796	713	974	777	1000	360
ENSG00000039523.20	1208	965	1199	959	1228	1347
ENSG00000039537.13	5	6	6	22	26	9
ENSG00000039560.14	471	538	221	253	190	123
ENSG00000039600.11	0	0	1	0	1	0
ENSG00000039650.12	526	644	728	628	593	832
ENSG00000039987.7	0	1	3	0	2	1
ENSG00000040199.18	257	236	298	259	307	211
ENSG00000040275.17	355	542	295	298	249	159
ENSG00000040341.18	687.96	552.66	728	797	702	561.93
ENSG00000040487.13	90	141	244	301	228	339
ENSG00000040531.16	204	303	344	320	298	433
ENSG00000040608.14	111	113	114	147	136	186
ENSG00000040633.13	488	917	802	1061	811	1348
ENSG00000040731.10	0	0	0	1	0	0
ENSG00000040933.16	680	724	723	712	591	655
ENSG00000041353.10	6	8	29	95	22	53
ENSG00000041357.16	1110	1758	1066	1473	944	806
ENSG00000041515.16	202	106	111	137	91	168
ENSG00000041802.11	491	630	493	542	489	549
ENSG00000041880.14	77	123	147	163	183	222
ENSG00000041982.16	66	306	389	494	248	97
ENSG00000041988.15	556	715	649	709	553	709
ENSG00000042062.13	15	62	22	13	24	13
ENSG00000042088.14	389	337	265	242	195	339
ENSG00000042286.15	60	89	144	187	196	163
ENSG00000042304.12	0	0	0	0	0	0
ENSG00000042317.17	91	63	80	74	100	70
ENSG00000042429.12	407	569	534	555	512	412
ENSG00000042445.14	256	309	256	299	233	246
ENSG00000042493.16	11	6	6	9	5	7
ENSG00000042753.12	1273	1552	1138	1294	1107	1666
ENSG00000042781.14	4	6	35	14	51	15
ENSG00000042813.8	0	0	0	0	0	0
ENSG00000042832.12	0	4	0	1	2	5
ENSG00000042980.13	0	0	0	0	0	0
ENSG00000043039.7	0	0	0	0	0	0
ENSG00000043093.15	416	343	366	302	407	137
ENSG00000043143.20	215	273	1165	1202	1032	1325
ENSG00000043355.12	10	4	3	5	3	0
ENSG00000043462.12	0	0	1	8	2	0
ENSG00000043514.17	259	290	173	202	145	119
ENSG00000043591.6	0	0	0	0	0	0
ENSG00000044012.4	0	0	0	0	0	0
ENSG00000044090.10	1259	998	1370.91	1503	1417	1967
ENSG00000044115.21	2637	2647	2442	2412	2424	2862
ENSG00000044446.12	386	433	328	418	288	484
ENSG00000044459.15	183	211	235	247	177	137
ENSG00000044524.11	0	0	0	0	0	0
ENSG00000044574.8	2001	3494	3876	3944	3182	2876
ENSG00000046604.13	32	13	4	4	0	1
ENSG00000046647.13	285	200	187	152	164	170
ENSG00000046651.15	325	414	315	336	292	169
ENSG00000046653.15	137	181	130	141	157	76
ENSG00000046774.10	1	1	2	4	4	8
ENSG00000046889.19	0	0	0	0	0	0
ENSG00000047056.16	452	339	494	401	474	496
ENSG00000047188.16	724	690	682	590	595	228
ENSG00000047230.15	308	452	489	459	410	370
ENSG00000047249.18	337	356	499	446	479	544
ENSG00000047315.17	2137	2644	1811	2083	1840	1526
ENSG00000047346.12	231	178	341	310	291	142
ENSG00000047365.12	0	0	0	0	0	0
ENSG00000047410.14	2894	3229	2690	1965	2276	1025
ENSG00000047457.14	18	22	28	24	26	19
ENSG00000047578.13	356	422	419	434	447	575
ENSG00000047579.20	123	151	92	142	96	159
ENSG00000047597.7	48	19	15	14	7	10
ENSG00000047617.15	0	0	0	0	0	1
ENSG00000047621.12	139	228	221	201	193	125
ENSG00000047634.15	254	197	174	220	148	136
ENSG00000047644.19	338	353	330	278	282	330
ENSG00000047648.23	79	110	98	115	148	48
ENSG00000047662.5	227	96	129	94	129	103
ENSG00000047849.21	2753	2630	2913	3177	3854	3729
ENSG00000047932.14	862	706	613	628	544	305
ENSG00000047936.10	0	0	0	0	0	0
ENSG00000048028.11	293	343	304	252	277	218
ENSG00000048052.21	3954	2602	1793	1224	1675	807
ENSG00000048140.18	541	883	1074	1410	1199	1657
ENSG00000048162.21	438	690	258	310	259	321
ENSG00000048342.16	42	62	80	102	138	107
ENSG00000048392.12	559	216	260	240	374	131
ENSG00000048405.10	479	445	372	314	374	234
ENSG00000048462.11	0	0	0	0	0	0
ENSG00000048471.14	252	250	352	351	385	471
ENSG00000048540.15	310	440	403	461	250	199
ENSG00000048544.6	465	320	309	224	322	252
ENSG00000048545.14	30	22.5	47	102	96	110.61
ENSG00000048649.13	1300.17	1218	1223.63	873.05	1195	471
ENSG00000048707.15	656	517	1107	1018	1311	1440
ENSG00000048740.18	14	18	11	37	7	33
ENSG00000048828.17	1081.95	1455.69	989.71	975.33	1021.74	791.56
ENSG00000048991.16	779	839	659	576	546	439
ENSG00000049089.15	102	87	101	110	160	123
ENSG00000049130.16	122	149	262	238	281	91
ENSG00000049167.14	139.67	140.17	110.5	132.47	106.64	99.08
ENSG00000049192.15	39	25	34	36	24	9
ENSG00000049239.13	1063	772	1064	1096	1101	1303
ENSG00000049245.13	468	475	460	520	532	416
ENSG00000049246.14	471	464	304	285	252	283
ENSG00000049247.13	54	37	44	34	25	21
ENSG00000049249.9	0	2	0	1	10	3
ENSG00000049283.18	2	5	2	5	8	4
ENSG00000049323.16	92	33	203	588	702	343
ENSG00000049449.10	842.14	884.94	301.42	460.84	296.3	278.87
ENSG00000049540.17	520	704	851	1157	5198	1230
ENSG00000049541.11	474	831	649	680	398	962
ENSG00000049618.24	1646	1677	2167	1992	1855	1748
ENSG00000049656.14	1720	2010	1590	1821	1480	1929
ENSG00000049759.18	494	429	473	531	455	578
ENSG00000049768.16	4.92	5.25	6.44	6	10.2	2
ENSG00000049769.14	203	232	260	315	249	362
ENSG00000049860.14	482	254	279	330	305	338
ENSG00000049883.15	335	252	147	148	149	119
ENSG00000050030.15	194	174	118	109	102	101
ENSG00000050130.18	337	361	530	484	454	317
ENSG00000050165.18	967	901	1448	1811	1914	2644
ENSG00000050327.15	0	0	0	0	0	2
ENSG00000050344.9	544	612	359	309	293	188
ENSG00000050393.11	674	650	760	752	856	893
ENSG00000050405.13	184	543	667	848	616	378
ENSG00000050426.16	763	427	443	456	489	567
ENSG00000050438.17	549	608	1991	2166	2717	3197
ENSG00000050555.18	5	4	0	1	0	3
ENSG00000050628.20	29	33	24	42	9	31
ENSG00000050730.16	0	0	0	0	3	2
ENSG00000050748.17	315	379	482	573	526	458
ENSG00000050767.17	35	18	61	65	173	98
ENSG00000050820.17	637	709	806.23	925	981.33	1035
ENSG00000051009.11	287	302	335	410	345	455
ENSG00000051108.15	210	323	401	434	339	497
ENSG00000051128.19	308	466	399	457.84	404	467
ENSG00000051180.17	179	530	258	293	122	314
ENSG00000051341.14	293	527	302	229	159	128
ENSG00000051382.9	256	154	124	149	125	126
ENSG00000051523.11	257	217	394	582	647	882
ENSG00000051596.10	794.77	1147.23	661.13	764.87	452.22	814.28
ENSG00000051620.11	20	17	31	16	63	39
ENSG00000051825.15	576.27	442.8	358.04	257	259	165.42
ENSG00000052126.14	172	144	125	124	105	68
ENSG00000052344.16	2	1	2	0	2	0
ENSG00000052723.12	891	624	619	574	681	351
ENSG00000052749.14	1197	1598	739	886	797	853
ENSG00000052795.13	226	314	401	436	444	391
ENSG00000052802.13	615	384	622	673	468	629
ENSG00000052841.15	1386	920	809	908	741	820
ENSG00000052850.8	2	2	3	5	1	3
ENSG00000053108.17	29	41	207	401	81	301
ENSG00000053254.15	1548	1285	1227	1101	1105	1280
ENSG00000053328.8	2	0	1	5	5	2
ENSG00000053371.12	298	322	352	336	316	437
ENSG00000053372.5	509	811	360	452	336	549
ENSG00000053438.11	1126	2392	3101	2813	2352	3034
ENSG00000053501.13	178	147	170	198	197	264
ENSG00000053524.12	132	98	140	119	181	124
ENSG00000053702.15	35	27	37	36	28	34
ENSG00000053747.16	72	37	8	3	2	1
ENSG00000053770.12	464	512	656	572	623	344
ENSG00000053900.10	283	267	241	209	242	94
ENSG00000053918.18	165	66	158	171	200	285
ENSG00000054116.12	399	453	387	550	389	613
ENSG00000054118.15	1508	2123	1676	1932	1534	1597
ENSG00000054148.18	454	836	700	834	866	1416
ENSG00000054179.12	5	11	5	7	8	13
ENSG00000054219.11	1	0	0	0	0	0
ENSG00000054267.22	583	782	813.11	618.83	694.05	334.87
ENSG00000054277.14	839.72	364.89	524.66	400.7	479.58	430.3
ENSG00000054282.16	234	287	278	226	264	156
ENSG00000054356.14	1682	1522	2168	2306	2312	2943
ENSG00000054392.13	333	272	307	324	211	436
ENSG00000054523.17	2416	2075	2636.23	2107	2403	2607
ENSG00000054598.9	67	73	3211	4069	2718	2753
ENSG00000054611.14	168	301	246	277	222	380
ENSG00000054654.18	1708	2602	1814	1520	1348	805
ENSG00000054690.14	210	215	223	212	179	153
ENSG00000054793.14	1103	866	1463	1299	1469	1903
ENSG00000054796.13	0	0	0	0	0	0
ENSG00000054803.4	566	601	7	0	0	0
ENSG00000054938.15	0	0	0	0	0	0
ENSG00000054965.10	1398	1632	1908	2031	1797	2130
ENSG00000054967.13	235	412	226	248	185	227
ENSG00000054983.17	295	245	280	256	330	237
ENSG00000055044.11	665	1114	554	589	499	209
ENSG00000055070.17	1587	2352	1901	2406	1628	2138
ENSG00000055118.15	3093	2989	5068	4843	5321	4520
ENSG00000055130.17	816	1288	960	1142	902	834
ENSG00000055147.19	172	230	251	261	237	161
ENSG00000055163.20	1743	1643	1853	1401	2314	1991
ENSG00000055208.19	981	762	869	903	747	583
ENSG00000055211.14	180	85	140	125	142	124
ENSG00000055332.18	1321	1039	1019	890	1057	757
ENSG00000055483.19	801	876	804	867	685	898
ENSG00000055609.18	1940	1520	1874	1299	1723	1220
ENSG00000055732.13	0	0	0	0	0	0
ENSG00000055813.6	0	0	0	0	0	0
ENSG00000055917.15	2802	2507	2199	2220	2205	1433
ENSG00000055950.16	743	752	577	746	604	910
ENSG00000055955.17	8.09	4.14	15.49	24.77	19.33	8.44
ENSG00000055957.11	2	2	0	4	0	7
ENSG00000056050.7	400	449	234	283	220	172
ENSG00000056097.16	1419	1303	1149	1245	1145	974
ENSG00000056277.16	349	281	225	134	225	88
ENSG00000056291.17	100	64	129	105	92	87
ENSG00000056487.16	1973	2484	2300	2421	2052	2720
ENSG00000056558.11	2	13	8	8	10	5
ENSG00000056586.16	1078	1188	1276	1058	1219	606
ENSG00000056736.10	37	43	30	31	36	26
ENSG00000056972.20	12	11	254	537	81	282
ENSG00000056998.20	55	64	64	58	74	142
ENSG00000057019.16	490	624	752	701	694	435
ENSG00000057149.16	0	0	0	0	0	0
ENSG00000057252.13	274	356	402	311	374	329
ENSG00000057294.15	132	83	45	55	64	50
ENSG00000057468.7	0	0	0	0	0	0
ENSG00000057593.14	2	0	4	9	20	13
ENSG00000057608.17	2241	2530	1652	2076	1596	1657
ENSG00000057657.17	0	0	4	0	0	0
ENSG00000057663.16	193	228	207	222	205	142
ENSG00000057704.13	31	25	22	23	30	27
ENSG00000057757.10	294	494	451	523	391	566
ENSG00000057935.13	1444	1229	1635	1865	1460	1858
ENSG00000058056.9	716	603	303	402	346	279
ENSG00000058063.16	719	514	451	467	534	247
ENSG00000058085.15	2	2	0	0	1	1
ENSG00000058091.17	595	643	425	425	297	312
ENSG00000058262.10	2588	3408	3275	3878	2988	4227
ENSG00000058272.19	561	513	520	483	540	284
ENSG00000058335.15	0	0	0	2	2	0
ENSG00000058404.20	55	69	35	49	19	56
ENSG00000058453.17	935	1222.03	1058	1030	886	1078
ENSG00000058600.16	990	986	482	624	435	507
ENSG00000058668.14	655	443	520	586	618	680
ENSG00000058673.16	3416.39	2662.21	2898.73	3221.43	2647.13	1924.54
ENSG00000058729.11	178	167	119	113	127	69
ENSG00000058799.15	154	138	233	249	260	408
ENSG00000058804.12	1082	1124	683	674	504	432
ENSG00000058866.15	14	3	4	5	10	7
ENSG00000059122.16	569	668	768	842	819	1094
ENSG00000059145.19	479	403	516	613	548	616
ENSG00000059377.18	10	20	7	9	12	10
ENSG00000059378.13	9	12	17	18	25	12
ENSG00000059573.9	1116	1342	799	876	687	944
ENSG00000059588.10	1152	697	611	559	605	286
ENSG00000059691.12	336	445	264	372	297	404
ENSG00000059728.11	197	114	150	131	143	105
ENSG00000059758.8	254	213	242	212	219	124
ENSG00000059769.20	128.49	114.64	86.78	116.25	68.58	48.96
ENSG00000059804.16	0	0	0	0	1	0
ENSG00000059915.17	428	435	642	656	680	854
ENSG00000060069.17	393	560	386	486	373	476
ENSG00000060138.13	0	0	0	0	2	1
ENSG00000060140.9	0	0	0	0	0	0
ENSG00000060237.17	2217	2440	2351	2243	2087	2021
ENSG00000060303.5	0	0	0	0	0	0
ENSG00000060339.14	748	1142	828	795	758	363
ENSG00000060491.16	585	740	522	671	525	774
ENSG00000060558.4	0	0	0	0	0	0
ENSG00000060566.14	3	2	4	2	5	4
ENSG00000060642.11	190	122	188	156	154	186
ENSG00000060656.20	726	436	137	236	136	243
ENSG00000060688.13	354	616	302	398	277	428
ENSG00000060709.15	3019	1802	2958	2393	2741	2230
ENSG00000060718.22	116	101	85	59	48	32
ENSG00000060749.15	1561	1314	1255	891	984	529
ENSG00000060762.19	229	280	148	240	141	195
ENSG00000060971.18	178	357	312	451	303	446
ENSG00000060982.15	808	1568	957	838	631	346
ENSG00000061273.18	841	902	1048	1042	1087	1023
ENSG00000061337.15	84	289	425	1031	180	855
ENSG00000061455.11	9	3	13	16	19	8
ENSG00000061492.12	0	0	1	0	0	0
ENSG00000061656.10	80	67	83	86	73	95
ENSG00000061676.15	1965	1758	1537	1440	1432	763
ENSG00000061794.13	444	397	225	341	249	249
ENSG00000061918.13	309	201	106	147	94	113
ENSG00000061936.9	1273	1319	956	1127	918	980
ENSG00000061938.19	981	795	825	742	806	822
ENSG00000061987.16	557	467	519	496	576	299
ENSG00000062038.14	52	20	15	8	10	19
ENSG00000062096.15	0	0	0	0	0	0
ENSG00000062194.16	1009	859	819	760	799	388
ENSG00000062282.15	33	47	37	62	42	134
ENSG00000062370.16	69	104	144	147	114	54
ENSG00000062485.19	3176.09	2746	2043	1822	2148	2224
ENSG00000062524.16	25	15	42	46	87	16
ENSG00000062582.14	660	795.07	355	573.91	362.5	577
ENSG00000062598.18	426	542	844	785	991	1124
ENSG00000062650.19	809	942	840	657	710	422
ENSG00000062716.13	915	794	834	952	1010	873
ENSG00000062725.10	936	737	1038	931	1087	536
ENSG00000062822.15	1303	2182	1336	1573.64	887	1502
ENSG00000063015.20	222	215	286	452	174	482
ENSG00000063046.17	8759.67	5850.93	3330.91	4488.9	3216.94	4562.92
ENSG00000063127.16	0	0	0	0	0	0
ENSG00000063169.10	503	504	674	541	559	505
ENSG00000063176.16	288	578	626	717	672	802
ENSG00000063177.13	11798	8296	5452	7347	5531	10684
ENSG00000063180.9	206	205	213	330	324	406
ENSG00000063241.8	339	501	270	393	287	482
ENSG00000063244.12	1874	4265	2257	3339	1947	3011
ENSG00000063245.15	2835	2887	3243	3497.04	2917	3927
ENSG00000063322.15	491	773	744	851	666	1081
ENSG00000063438.17	1.2	2.59	9.45	2.32	4.41	6.82
ENSG00000063515.2	0	0	0	0	0	0
ENSG00000063587.15	388	333	405	391	384	432
ENSG00000063601.17	379	511	370	392	328	264
ENSG00000063660.9	517	575	1048	1062	1088	1333
ENSG00000063761.16	89	65	57	50	95	61
ENSG00000063854.13	208	491	402	639	372	683
ENSG00000063978.16	574	707	633	846	667	721
ENSG00000064012.22	9	5	12	14	18	5
ENSG00000064042.18	1668	1646	2333	2039	2899	1119
ENSG00000064102.15	365	309	135	138	115	71
ENSG00000064115.11	1050	819	794	861	764	867
ENSG00000064195.7	0	0	0	0	0	1
ENSG00000064199.6	169	190	114	121	103	124
ENSG00000064201.16	6	5	6	9	10	4
ENSG00000064205.10	2	0	1	0	3	0
ENSG00000064218.5	0	0	0	0	0	0
ENSG00000064225.12	240	200	642.54	546	430.45	287
ENSG00000064270.12	1	0	1	1	5	3
ENSG00000064300.9	333	48	32	84	103	215
ENSG00000064309.14	322	361	298	314	202	355
ENSG00000064313.12	583	548	470	507	459	249
ENSG00000064393.16	1577	2083	2161	1887	2022	2371
ENSG00000064419.13	1396	1625	1249	1220	1004	1178
ENSG00000064489.23	15.2	18.72	4.87	8.62	9.43	15.49
ENSG00000064490.14	284	404	387	398	349	568
ENSG00000064545.15	569	529	246	274	248	332
ENSG00000064547.14	427	355	600	488	554	581
ENSG00000064601.19	402	598	994	993	1271	1066
ENSG00000064607.17	2584	2569	2312	2470	2004	2151
ENSG00000064651.14	190	172	245	198	172	106
ENSG00000064652.11	169	139	210	203	223	159
ENSG00000064655.19	7	1	3	5	2	3
ENSG00000064666.15	743	192	724	728	935	934
ENSG00000064687.13	177	163	346	247	375	318
ENSG00000064692.19	64	53	1252	1318	838	1119
ENSG00000064703.12	365	476	368	392	328	273
ENSG00000064726.10	710	782	610	787	701	532
ENSG00000064763.11	57	69	73	143	148	58
ENSG00000064787.13	1	0	0	3	0	0
ENSG00000064835.11	0	0	0	0	0	0
ENSG00000064886.14	0	0	0	0	0	0
ENSG00000064932.16	1105	952	741	779	703	837
ENSG00000064933.18	277	318	203	197	188	114
ENSG00000064961.19	1589	1322	1124	1488	1122	1667
ENSG00000064989.13	1	1	0	1	2	2
ENSG00000064995.18	363	546	512	604	437	630
ENSG00000064999.15	1143	1065	890	927	828	1134
ENSG00000065000.19	2855	3029	2948	2795	2806	3564
ENSG00000065029.15	259	382	343	405	306	390
ENSG00000065054.14	320	245	211	257	261	394
ENSG00000065057.9	309	505	179	288	194	374
ENSG00000065060.17	475	559	485	428	377	523
ENSG00000065135.12	1384	1785	1596	1893	1587	1006
ENSG00000065150.21	3753	3695	2197	1959	1842	1759
ENSG00000065154.12	618	861	541	677	624	594
ENSG00000065183.16	1222	1167	500	512	529	397
ENSG00000065243.20	446	457	424	368	463	178
ENSG00000065268.11	600	1040	520	814	526	702
ENSG00000065308.5	399	502	885	952	732	880
ENSG00000065320.9	5	3	3	1	6	3
ENSG00000065325.13	0	0	0	0	0	0
ENSG00000065328.16	404	1194	546	487	273	380
ENSG00000065357.20	176	129	166	131	218	171
ENSG00000065361.16	35	10	7	9	16	25
ENSG00000065371.17	0	0	0	0	0	3
ENSG00000065413.20	694	909	992	669	599	420
ENSG00000065427.14	3108	2910	1396	1931	1426	2040
ENSG00000065457.10	383	438	550	542	424	702
ENSG00000065485.20	129	130	72	76	85	71
ENSG00000065491.8	206	248	164	203	217	326
ENSG00000065518.8	833	988	504	607	485	608
ENSG00000065526.12	1777	2171	1919	1315	1582	1429
ENSG00000065534.18	78	81	81	73	130	108
ENSG00000065548.18	793	811	538	547	480	201
ENSG00000065559.15	359	340	509	465	622	335
ENSG00000065600.12	655	553	507	568	499	643
ENSG00000065609.14	1089	882	642	637	646	574
ENSG00000065613.15	455	480	399	391	469	143
ENSG00000065615.14	424	537	474	445	411	259
ENSG00000065618.21	0	0	14	15	32	21
ENSG00000065621.15	19	10	3	2	6	12
ENSG00000065665.21	426	332	548	521	577	688
ENSG00000065675.15	21	38	7	10	11	6
ENSG00000065717.15	44	23	15	32	28	27
ENSG00000065802.12	1068	1171	1150	1328	923	1342
ENSG00000065809.13	758	1456	897	946	872	581
ENSG00000065833.9	540	268	245	183	179	144
ENSG00000065882.16	953	603	577	636	368	526
ENSG00000065883.16	1230	1161	1319	1315	1159	947
ENSG00000065911.12	877	1169	645	879	546	871
ENSG00000065923.10	264	126	174	118	126	139
ENSG00000065970.9	281	254	237	214	283	322
ENSG00000065978.19	14083.3	16371.5	11043.6	13269.1	9767.61	12332.6
ENSG00000065989.16	79	49	37	48	54	66
ENSG00000066027.12	261	182	200	206	180	168
ENSG00000066032.18	679	588	708	781	714	709
ENSG00000066044.15	1899	1828	1629	1605	1453	1603
ENSG00000066056.14	2	0	0	0	0	0
ENSG00000066084.13	981	989	828	740	673	711
ENSG00000066117.15	2032	2154	2005	2263	1832	1935
ENSG00000066135.13	656	966	893	979	921	1120.21
ENSG00000066136.20	281	520	470	464	409	507
ENSG00000066185.13	3	1	3	5	11	6
ENSG00000066230.12	136.53	153.38	138.62	157.42	129.92	236.91
ENSG00000066248.15	19	9	4	8	2	0
ENSG00000066279.18	2225	2162	1301	672	778	351
ENSG00000066294.15	0	0	0	0	0	0
ENSG00000066322.15	205	333	218	218	251	224
ENSG00000066336.12	1	0	0	0	1	0
ENSG00000066379.15	178	216	80	110	94	169
ENSG00000066382.16	181	99	1585	1494	1494	1295
ENSG00000066405.13	8	4	4	5	10	1
ENSG00000066422.5	525	368	381	300	391	204
ENSG00000066427.24	295	154	253	196	253	144
ENSG00000066455.13	359	358	375	427	367	289
ENSG00000066468.23	22	32	3	12	13	8
ENSG00000066557.6	294	332	210	213	171	75
ENSG00000066583.12	674	1128	657	1102	871	557
ENSG00000066629.18	208	475	321	339	302	267
ENSG00000066651.20	270	170	133	150	118	46
ENSG00000066654.14	393	447	422	425	454	220
ENSG00000066697.14	446	421	434	425	394	306
ENSG00000066735.14	1753	2089	3719	3813	3463	5087
ENSG00000066739.12	720	588	756	685	704	355
ENSG00000066777.9	666	526	639	512	590	279
ENSG00000066813.14	0	0	0	0	0	0
ENSG00000066827.16	96	102	106	87	97	120
ENSG00000066855.16	353	266	112	128	110	86
ENSG00000066923.17	103.58	200.25	204.4	175.48	211.26	266.78
ENSG00000066926.12	327	322	343	357	364	359
ENSG00000066933.16	469	356	500	510	578	426
ENSG00000067048.17	0	0	0	0	0	0
ENSG00000067057.17	1416	1608	643	1185	871	1422
ENSG00000067064.11	399	556	677	915	416	522
ENSG00000067066.17	0	0	4	0	5	1
ENSG00000067082.15	262	363	297	396	348	266
ENSG00000067113.17	88	54	91	121	123	111
ENSG00000067141.17	1234	1184	1323	1427	1150	1501
ENSG00000067167.8	589	508	430	504	448	324
ENSG00000067177.15	583	362	262	286	242	251.06
ENSG00000067182.8	24	24	14	71	109	74
ENSG00000067191.16	300	359	355	367	379	631
ENSG00000067208.14	186	113	158	142	179	50
ENSG00000067221.14	144	133	149	182	157	234
ENSG00000067225.18	5851	15852	8140	9719	7559	8671
ENSG00000067248.10	242	340	315	282	314	118
ENSG00000067334.14	621	664	422	450	454	144
ENSG00000067365.15	338	249	210	284	142	237
ENSG00000067369.14	1528	2013	2881	2493	2748	2506
ENSG00000067445.21	1720	1752	2045	2599	2048	2924
ENSG00000067533.6	416	551	269	278	275	120
ENSG00000067560.12	4162	3427	3331	2898	2945	3701
ENSG00000067596.12	1154	1482	1087	1364	917	1523
ENSG00000067601.8	31	26	38	24	32	45
ENSG00000067606.17	514	483	453	516	434	682
ENSG00000067646.12	0	0	0	0	0	0
ENSG00000067704.10	2776	2422	1591	1575	1625	1255
ENSG00000067715.14	862	528	632	688	892	453
ENSG00000067798.16	0	0	0	1	0	0
ENSG00000067829.19	397	339	333	245	352	442
ENSG00000067836.13	286.35	350	938.61	1272.19	816.11	1547.79
ENSG00000067840.12	1921	1998	2320	2754	2126	2945
ENSG00000067842.17	137	87	121	217	119	368
ENSG00000067900.8	628.63	563.91	527.62	389.86	446.56	191.69
ENSG00000067955.15	596	581	600	616	565	401
ENSG00000067992.15	373	306	410	269	377	218
ENSG00000068001.14	671	1109	797	1216	836	1287
ENSG00000068024.16	359	406	630	564	577	565
ENSG00000068028.17	251	377	375	515	349	479
ENSG00000068078.18	97	42	42	27	42	42
ENSG00000068079.8	0	0	0	1	1	0
ENSG00000068097.15	865	743	681	692	682	776
ENSG00000068120.15	1013	1045	705	768	699	958
ENSG00000068137.15	662	627	620	731	564	766
ENSG00000068305.17	493	452	558	544	542	368
ENSG00000068308.13	983	926	1217	1369	1358	1652
ENSG00000068323.17	398	476	613	661	580	750
ENSG00000068354.16	211	212	240	265	239	340
ENSG00000068366.20	502	422	457	411	494	246
ENSG00000068383.19	200	215	313	285	318	298
ENSG00000068394.11	256	345	304	369	257	468
ENSG00000068400.13	660	887	907	1060	902	958
ENSG00000068438.15	400	523	384	406	289	434
ENSG00000068489.13	1946	1182	869	591	542	729
ENSG00000068615.19	51	82	102	173	81	160
ENSG00000068650.18	523	524	220	279	168	373
ENSG00000068654.16	834	1642	1024	1071	1001	1394
ENSG00000068697.7	1418	1604	1950	2614	1715	2612
ENSG00000068724.17	271	216	326	343	333	461
ENSG00000068745.15	1126	1317	1064	1503	1093	1507
ENSG00000068781.21	0	0	0	0	0	0
ENSG00000068784.13	352	405	291	274	249	148
ENSG00000068796.18	1778	1730	1597	1235	1418	695
ENSG00000068831.19	171	69	157	178	209	312
ENSG00000068878.15	1465	1080	1041	923	921	620
ENSG00000068885.15	369	431	543.38	480	555.3	211.87
ENSG00000068903.20	337	283	317	398	313	483
ENSG00000068912.14	608	398	470	576	520	368
ENSG00000068971.14	388	344	655	788	731	1014
ENSG00000068976.14	4	2	3	3	3	3
ENSG00000068985.5	0	0	0	0	0	0
ENSG00000069011.16	0	0	0	0	0	0
ENSG00000069018.19	0	0	0	0	0	0
ENSG00000069020.18	168	155	292	237	263	190
ENSG00000069122.19	0	0	0	0	0	1
ENSG00000069188.17	9	9	6	13	12	7
ENSG00000069206.15	0	0	0	0	0	0
ENSG00000069248.12	1651	1613	1140	1130	1033	941
ENSG00000069275.13	6993	9263	6096	7415	5187	4036
ENSG00000069329.18	1336	1507	1361	1494	1436	1162
ENSG00000069345.12	999	779	710	738	701	707
ENSG00000069399.15	3	0	8	14	35	11
ENSG00000069424.15	358	263	240	333	210	379
ENSG00000069431.11	1	1	1	1	1	0
ENSG00000069482.7	635	1210	668	1058	886	1300
ENSG00000069493.15	73.4	37.46	148	79.97	99.94	32.84
ENSG00000069509.6	122	190	142	182	157	117
ENSG00000069535.14	34	21	154	228	149	199
ENSG00000069667.16	190	89	146	107	119	68
ENSG00000069696.7	43	8	13	3	15	10
ENSG00000069702.11	0	0	0	0	0	0
ENSG00000069764.10	0	0	0	0	0	0
ENSG00000069812.11	0	1	0	0	2	0
ENSG00000069849.11	1041	741	708	614	624	484
ENSG00000069869.16	124	100	132	139	121	62
ENSG00000069943.10	55	45	42	58	51	27
ENSG00000069956.12	615	720	566	633	565	270
ENSG00000069966.18	351	245	351	465	337	559
ENSG00000069974.16	37	54	58	46	46	24
ENSG00000069998.12	743	1157	603	812	510	844
ENSG00000070010.19	732	886	804	961	610	905
ENSG00000070018.9	859	812	1237	1191	988	750
ENSG00000070019.5	0	0	0	0	0	0
ENSG00000070031.4	0	0	0	0	1	0
ENSG00000070047.13	1426	2005	1633	1720	1415	1782
ENSG00000070061.15	1217	1172	986	852	956	723
ENSG00000070081.17	260	183	271	241	218	117
ENSG00000070087.14	2166	3560	1939	2882	1990	2222
ENSG00000070159.14	27	22	14	24	42	21
ENSG00000070182.21	219	214	134	206	91	455
ENSG00000070190.13	0	1	1	2	0	0
ENSG00000070193.5	0	0	0	0	0	0
ENSG00000070214.16	645	512	590	576	582	517
ENSG00000070269.14	134	181	188	200	204	160
ENSG00000070366.14	444	706	1232	1367	1057	1614
ENSG00000070367.16	1231	1172	1142	931	1031	494
ENSG00000070371.16	183	151	148	164	154	187
ENSG00000070388.11	2	10	25	23	38	44
ENSG00000070404.10	118	137	128	267	421	375
ENSG00000070413.20	813	1402	1743	2074	1725	2373
ENSG00000070423.18	721	833	531	614	483	614
ENSG00000070444.15	558	605	913	966	818	883
ENSG00000070476.15	306	383	395	349	320	294
ENSG00000070495.14	404	548	491	431	487	685
ENSG00000070501.12	298	339	168	278	223	214
ENSG00000070526.15	0	0	0	0	0	0
ENSG00000070540.13	162	58	104	135	129	172
ENSG00000070601.10	12	9	3	15	3	14
ENSG00000070610.14	1693	1669	1768	2079	1613	2078
ENSG00000070614.15	1363	2486	2335	2688	2194	3195
ENSG00000070669.17	1047.69	962.78	813.09	1114.03	705.9	1085.12
ENSG00000070718.12	325	504	379	400	371	439
ENSG00000070729.14	1	0	8	2	37	22
ENSG00000070731.11	0	0	0	0	2.05	0
ENSG00000070748.19	4	8	2	4	4	14
ENSG00000070756.16	17968	8948	6651	5593	6598	6669
ENSG00000070759.17	99	72	64	66	41.85	100
ENSG00000070761.8	395	662	630	831	532	975
ENSG00000070770.9	1022	897	848	781	762	733
ENSG00000070778.13	493	601	927	910	919	905
ENSG00000070785.17	228	259	130	143	124	134
ENSG00000070808.16	5	0	0	2	0	2
ENSG00000070814.22	2155	3309	1433	1778	1174	1904
ENSG00000070831.17	1650	1764	1797	2462.99	1959	1833
ENSG00000070882.13	480	376	401	207	171	118
ENSG00000070886.12	174	51	12	49	2	30
ENSG00000070915.10	0	4	0	2	8	2
ENSG00000070950.10	412	604	326	344	208	182
ENSG00000070961.15	576	576	711	831	887	369
ENSG00000070985.13	7	0	2	5	15	14
ENSG00000071051.14	714	646	956	665	867	995
ENSG00000071054.16	2702	3880	3231	3576	2684	2554
ENSG00000071073.13	291	170	212	204	194	158
ENSG00000071082.11	8297	8505	4197	7371	4238	6185
ENSG00000071127.17	1074	1506	1389	1771	1542	2046
ENSG00000071189.21	468	331	402	369	410	161
ENSG00000071203.9	0	0	0	0	0	0
ENSG00000071205.12	50	69	16	35	45	30
ENSG00000071242.12	697	653	866	1573	807	1740
ENSG00000071243.16	133	193	286	327	212	140
ENSG00000071246.11	643.46	728.51	978.22	1365.58	1015.85	1419.49
ENSG00000071282.12	224	262	253	291	209	348
ENSG00000071462.12	1372	1065	823	1010	777	1174
ENSG00000071537.14	692	696	712	697	750	555
ENSG00000071539.14	586	925	473	517	330	484
ENSG00000071553.17	793	1004	1315	1575	1468	1919
ENSG00000071564.17	3634	4842	3247	3702	2424	3220
ENSG00000071575.11	317	381	2094	2910	3872	2457
ENSG00000071626.17	2121	2805	1439	1760	1265	1367
ENSG00000071655.18	1636.69	3260.25	3175	3227	2541.38	2970.58
ENSG00000071677.1	0	0	0	0	0	0
ENSG00000071794.16	1045	865	609	548	596	317
ENSG00000071859.15	398	641	542	747	568	740
ENSG00000071889.16	233	237	336	344	306	467
ENSG00000071894.17	1889	2200	2082	2151	1842	2206
ENSG00000071909.18	0	0	0	0	0	0
ENSG00000071967.12	88	47	54	68	73	73
ENSG00000071991.9	0	0	0	0	0	0
ENSG00000071994.11	1064	1252	869	1143	933	1100
ENSG00000072041.17	1004	613	274	300	273	209
ENSG00000072042.13	669.88	734.88	712	834	607	747
ENSG00000072062.14	749	843	1302	1128	1114	1192
ENSG00000072071.16	1665	1790	1720	1686	1812	2056
ENSG00000072080.11	0	0	0	2	0	3
ENSG00000072110.13	1588	1402	1129.32	1111	1199	1445
ENSG00000072121.16	338	486	480	416	407	553
ENSG00000072133.11	715	503	365	280	214	140
ENSG00000072134.15	771	736	736	841	757	1094
ENSG00000072135.13	330	257	395	347	691	359
ENSG00000072163.19	6	6	1	4	3	7
ENSG00000072182.12	177	240	713	1487	1152	1787
ENSG00000072195.15	1298	1011	1310	1466	1529.91	1870
ENSG00000072201.14	50	41	40	53	47	23
ENSG00000072210.19	589	635	606	624	569	586
ENSG00000072274.13	1527	2027	2895	2712	1648	2231
ENSG00000072310.17	1255	1313	2535	2800	2073	2855
ENSG00000072315.3	0	1	0	0	0	0
ENSG00000072364.13	2083	1549	1961	1802	2076	1427
ENSG00000072401.15	305	313	237	265	259	178
ENSG00000072415.9	289	281	291	290	325	144
ENSG00000072422.17	514	473	307	350	223	291
ENSG00000072501.18	2764	6099	3442	3524	2475	2860
ENSG00000072506.13	817	1475	850	1102	771	1299
ENSG00000072518.20	561	698	696	659	656	725
ENSG00000072571.20	854	631	310	270	221	113
ENSG00000072609.17	499	521	642	663	673	810
ENSG00000072657.9	0	0	0	1	0	0
ENSG00000072682.18	126	124	110	119	164	187
ENSG00000072694.21	0	0	0	0	0	0
ENSG00000072736.19	816.26	981.91	843.53	813	716.91	780.03
ENSG00000072756.17	248	288	173	179	199	96
ENSG00000072778.20	1532	1606	2645	3534	2629	3055
ENSG00000072786.13	378	490	480	548	465	580
ENSG00000072803.17	1374	1185	1143	1214	1073	1297
ENSG00000072818.12	30	6	29	9	31	45
ENSG00000072832.15	6051	6857	7242	8180	6440	9466
ENSG00000072840.13	171	192	262	271	308	361
ENSG00000072849.11	340	425	542	596	506	433
ENSG00000072858.10	19	3	5	3	4	1
ENSG00000072864.15	618	409	319	324	296	421
ENSG00000072952.18	193	115	88	100	104	123
ENSG00000072954.7	148	82	123	150	134	209
ENSG00000072958.8	1415	1789	1785	2108	1785	2520
ENSG00000073008.15	575.23	599.67	379.27	452.43	414.07	497.78
ENSG00000073050.12	484	407	351	301	338	557
ENSG00000073060.16	675	519	343	342	325	430
ENSG00000073067.14	7	4	8	5	6	6
ENSG00000073111.14	1439	4049	2170	2920	965	3146
ENSG00000073146.16	1	0	8	19	12	2
ENSG00000073150.14	72	109	118	132	125	153
ENSG00000073169.14	574	404	388	383	355	422
ENSG00000073282.13	0	0	0	0	0	0
ENSG00000073331.18	9	9	13	18	25	12
ENSG00000073350.14	188	89	158	130	184	207
ENSG00000073417.15	316	270	499	339	595	265
ENSG00000073464.12	301	367	349	388	371	437
ENSG00000073536.18	443	536	205	310	178	424
ENSG00000073578.17	1004.15	1076.43	643.39	727.98	557.61	752.26
ENSG00000073584.20	1889.19	2196.78	1816.58	1860.45	1700.16	1340.24
ENSG00000073598.6	5	8	1	4	2	7
ENSG00000073605.18	263	97	131	133	105	126
ENSG00000073614.13	1023	1084	798	870	750	797
ENSG00000073670.14	214	161	38	67	64	155
ENSG00000073711.11	211	165	240	161	246	185
ENSG00000073712.15	1056	930	1141	1366	1167	625
ENSG00000073734.10	0	0	0	0	0	0
ENSG00000073737.16	0	0	0	0	0	0
ENSG00000073754.6	0	0	0	0	0	0
ENSG00000073756.12	0	0	0	0	0	0
ENSG00000073792.16	0	1	0	0	2	0
ENSG00000073803.14	339	259	487	436	494	399
ENSG00000073849.15	188	206	131	154	129	127
ENSG00000073861.3	0	2	0	0	1	0
ENSG00000073905.8	2	1	1	0	1	0
ENSG00000073910.22	341	258	418	438	667	387
ENSG00000073921.18	946	890	840	1019	898	622
ENSG00000073969.18	512	734	781	668	751	690
ENSG00000074047.21	34	53	21	27	57	19
ENSG00000074054.18	1516	1626	1998	1811	1735	1764
ENSG00000074071.15	914	1463	666	1167	622	1067
ENSG00000074181.9	2251	1175	1229	1183	1487	1476
ENSG00000074201.9	1836	1487	913	1128	899	910
ENSG00000074211.14	118	51	66	86	68	137
ENSG00000074219.14	265	620	434	494	391	374
ENSG00000074266.21	248	317	235	235	195	143
ENSG00000074276.10	5	9	12	22	15	32
ENSG00000074317.11	70	39	11	26	14	31
ENSG00000074319.13	870	851	861	1166	878	1116
ENSG00000074356.17	941	906	1378	1328	1357	1146
ENSG00000074370.18	230	93	111	122	164	241
ENSG00000074410.14	3	5	5	8	7	2
ENSG00000074416.14	21	22	15	18	7	22
ENSG00000074527.13	32	17	16	36	17	26
ENSG00000074582.15	242	301	237	248	233	239
ENSG00000074590.13	38	42	32	41	28	46
ENSG00000074603.19	516	444	560	498	585	326
ENSG00000074621.14	111	112	160	119	233	155
ENSG00000074657.13	1557	1749	1839.99	1819	1579	1507
ENSG00000074660.16	5	4	10	7	8	12
ENSG00000074695.6	1434	980	1000	813	907	341
ENSG00000074696.13	1369	1379	1632	1283	1348	1584
ENSG00000074706.13	0	0	1	1	1	2
ENSG00000074755.15	911	941	853	840	773	960
ENSG00000074771.4	0	0	3	5	7	8
ENSG00000074800.16	8665	18909	6568	8351	5870	7813
ENSG00000074803.20	5	4	5	4	5	0
ENSG00000074842.8	352	555	403	708	411	721
ENSG00000074855.11	636	661	773	568	668	772
ENSG00000074935.14	396	193	197	202	184	131
ENSG00000074964.17	335	431	470	507	428	670
ENSG00000074966.11	0	0	184	137	215	73
ENSG00000075035.10	17	10	345	344	257	520
ENSG00000075043.18	3284	2764	4170	4781	3609	8261
ENSG00000075073.15	0	1	3	1	6	7
ENSG00000075089.9	556	435	281	314	278	175
ENSG00000075131.10	101.96	154	87	104	74	61.62
ENSG00000075142.14	1153	1118	807	801	851	935
ENSG00000075151.20	1283	1501	1355	1297	1247	998
ENSG00000075188.9	243	276	130	144	122	95
ENSG00000075213.11	34	34	22	31	56	7
ENSG00000075218.19	766	1226	744	723	470	780
ENSG00000075223.14	1010	850	194	535	533	176
ENSG00000075234.17	300	375	320	335	366	495
ENSG00000075239.14	634	552	434	560	515	338
ENSG00000075240.17	395	646	1010	1300	888	1284
ENSG00000075275.17	1	1	1	1	8	9
ENSG00000075290.8	28	8	2	6	2	10
ENSG00000075292.19	846	1125	1312	820	1078	352
ENSG00000075303.13	518	430	502	503	480	289
ENSG00000075336.12	195	311	172	240	168	150
ENSG00000075340.23	1492	1758	993	1140	632	1426
ENSG00000075388.4	0	0	0	0	0	0
ENSG00000075391.16	520	505	436	452	455	402
ENSG00000075399.14	107	144	373	422	374	409
ENSG00000075407.18	228.79	347.49	310.45	185.12	272.61	155.34
ENSG00000075413.18	1256	1105	1101	1105	1069	825
ENSG00000075415.13	4784	4093	3227	3592	3195	3912
ENSG00000075420.13	245	234	246	205	298	129
ENSG00000075426.12	61	67	62	166	232	114
ENSG00000075429.9	251	93	80	104	67	153
ENSG00000075461.6	6096	7234	13702	11713	8714	14338
ENSG00000075539.15	676	788	677	474	508	328
ENSG00000075568.17	672	624	747	585	802	450
ENSG00000075618.18	13775	17122	15465	15884	13657	16916
ENSG00000075624.16	24171	25690	34279	26293	32652	28080
ENSG00000075643.6	13	10	14	15	27	11
ENSG00000075651.16	15	3	10	29	60	9
ENSG00000075673.11	0	0	0	0	0	0
ENSG00000075702.18	366	856	554	421	337	363
ENSG00000075711.21	807	730	651	612	656	388
ENSG00000075785.13	1878	1972	2094	1940	2212	2596
ENSG00000075790.10	63.48	141.16	215.55	372.81	446.81	113.35
ENSG00000075826.17	207.79	113	183	159.52	155.12	127.13
ENSG00000075856.12	1427	1511	1128	1215	941	1177
ENSG00000075884.14	0	0	0	1	0	0
ENSG00000075886.11	2	6.25	1	0	2	3.07
ENSG00000075891.22	6	1	0	0	0	0
ENSG00000075914.13	322	412	159	208	182	235
ENSG00000075945.13	694	520	703	781	716	599
ENSG00000075975.16	500	438	379	429	442	386
ENSG00000076003.5	860	2357	1208	1447	715	1098
ENSG00000076043.10	113	164	101	156	129	118
ENSG00000076053.10	252	227.29	259.84	297	291	206.38
ENSG00000076067.13	568	338	410	345	407	358
ENSG00000076108.11	2544	1967	2120	1896	1893	2487
ENSG00000076201.15	1496	1201	1481	1165	1282	1500
ENSG00000076242.16	482	840	553	648	442	588
ENSG00000076248.11	470	814	650	993	528	969
ENSG00000076258.10	0	0	0	1	0	0
ENSG00000076321.11	264	354	321	380	323	272
ENSG00000076344.16	46	33	59	87	133	108
ENSG00000076351.13	771	961	1346	1422	1231	1742
ENSG00000076356.7	464	979	2738	2909	3791	3361
ENSG00000076382.17	1243	2164	1047	927	601	793
ENSG00000076513.17	357	335	423	523	411	537
ENSG00000076554.15	684.9	460	270	219.93	140	123.27
ENSG00000076555.15	599	366	672	448	547	486
ENSG00000076604.15	1413	1633	1459	1752	1473	1936
ENSG00000076641.4	138	99	42	39	48	35
ENSG00000076650.7	114	166	119	142	117	142
ENSG00000076662.10	66	86	101	118	89	127
ENSG00000076685.18	563	538	972	1034	924	880
ENSG00000076706.17	307	182	75	147	241	277
ENSG00000076716.9	60	24	1	3	1	1
ENSG00000076770.14	113	257	116	107	46	80
ENSG00000076826.9	607	496	459	372	428	648
ENSG00000076864.19	295	327	208	243	216	386
ENSG00000076924.12	1277	1173	849	859	792	1213
ENSG00000076928.18	1309	1625	1363	1397	1270	1248
ENSG00000076944.16	7	5	9.23	14	6.45	4.87
ENSG00000076984.17	858	768	766	875	617	1018
ENSG00000077009.13	0	0	0	0	0	2
ENSG00000077044.10	1217	956	723	752	709	927
ENSG00000077063.11	0	0	0	0	0	0
ENSG00000077080.10	419	590	646	795	547	988
ENSG00000077092.19	137	63	1026	1107	907	948
ENSG00000077097.15	3701	3757	3033	2403	2448	1157
ENSG00000077147.16	2021	2076	2070	2015	2035	1048
ENSG00000077150.20	352	203	186	206	245	259
ENSG00000077152.11	904	1312	648	915	405	638
ENSG00000077157.22	640	451	770	728	1968	689
ENSG00000077232.18	1212	1120	1211	1155	1334	649
ENSG00000077235.18	1763	2292	2044	2054	1905	2450
ENSG00000077238.14	15	14	19	63	63	80
ENSG00000077254.14	842	858	1055	971	1057	756
ENSG00000077264.15	280	205	344	297	318	289
ENSG00000077274.9	3	1	0	2	2	9
ENSG00000077279.19	1401	640	2124	2019	1334	3284
ENSG00000077312.9	1656	1304	757	695	570	784
ENSG00000077327.16	116	72	83	87	89	55
ENSG00000077348.9	410	521	183	276	189	339
ENSG00000077380.15	1185.95	1702	1441.96	1461.98	1372.9	985
ENSG00000077420.16	0	0	0	0	0	0
ENSG00000077454.16	716.83	735.88	761.14	616.71	703.03	618.22
ENSG00000077458.13	469	448	373	483	334	200
ENSG00000077463.15	250	385	327	400	271	378
ENSG00000077498.9	0	0	0	0	0	0
ENSG00000077514.9	272	429	206	264	137	206
ENSG00000077522.13	107	105	19	42	8	14
ENSG00000077549.19	1470	1114	1590	1741	1427	1883
ENSG00000077585.14	169	109	110	87	119	131
ENSG00000077616.11	239	186	218	211	193	66
ENSG00000077684.16	681	915	534	593	372	424
ENSG00000077713.19	3	2	2	0	0	1
ENSG00000077721.16	497	466	726	647	630	605
ENSG00000077782.21	935	1047	606	771	623	1058
ENSG00000077800.13	7	4	3	2	0	4
ENSG00000077935.17	0	0	1	0	0	0
ENSG00000077942.19	3265	2513	2255	1812	1518	1586
ENSG00000077943.8	0	0	0	0	0	0
ENSG00000077984.6	0	0	0	0	0	0
ENSG00000078018.20	1910	2127	2514	1842	2111	1756
ENSG00000078043.16	444	267	342	305	346	173
ENSG00000078053.17	0	0	0	1	0	0
ENSG00000078061.13	360	361	314	406	290	346
ENSG00000078070.13	247	316	245	271	245	269
ENSG00000078081.8	7	0	0	0	1	1
ENSG00000078098.14	1	1	1	0	10	0
ENSG00000078114.18	239	143	595	541	425	433
ENSG00000078124.12	292	279	341	312	359	248
ENSG00000078140.14	1162	1297	1045	1009	933	621
ENSG00000078142.13	633	692	641	595	556	443
ENSG00000078177.14	473	425	540	367	506	217
ENSG00000078237.7	114	189	212	151	197	138
ENSG00000078246.17	413	401	493	452	409	436
ENSG00000078269.15	59	68	61	109	224	101
ENSG00000078295.17	0	0	0	0	0	0
ENSG00000078304.19	2243	1482	1778	1657	1531	1448
ENSG00000078319.9	59	121	53	97	65	147
ENSG00000078328.21	10	8	0	0	1	0
ENSG00000078369.18	6603	7987	7858	8643	7114	8253
ENSG00000078399.19	0	0	0	0	0	0
ENSG00000078401.7	1	0	1	2	5	1
ENSG00000078403.17	876	745	720	709	554	559
ENSG00000078487.17	20	34	37	31	49	44
ENSG00000078549.14	1320	1421	225	284	171	275
ENSG00000078579.9	1	0	0	0	0	1
ENSG00000078589.13	0	0	0	0	0	0
ENSG00000078596.11	8	1	3	4	2	2
ENSG00000078618.21	1759	1624	1119	1197	1090	815
ENSG00000078668.14	824	1239	842	979	706	723
ENSG00000078674.17	1665	1815	1457	1034	1116	613
ENSG00000078687.17	936	977	950	840	759	815
ENSG00000078699.22	1897	1551	2203	1757	1500	2095
ENSG00000078725.13	36	14	86	107	102	197
ENSG00000078747.15	500.07	410.06	398.08	342.17	401.27	273.14
ENSG00000078795.16	25	24	74	54	68	53
ENSG00000078804.13	490	304	1314	1216	1312	1524
ENSG00000078808.18	1237	1409	1442	1609	1547	1612
ENSG00000078814.17	20	12	10	10	10	8
ENSG00000078898.7	0	0	0	0	0	0
ENSG00000078900.15	200	362	440	440	325	467
ENSG00000078902.16	452	543	679	814	633	1093
ENSG00000078967.13	669	448	734	526	668	614
ENSG00000079101.16	17	4	11	16	8	17
ENSG00000079102.16	168	274	89	130	60	116
ENSG00000079112.10	0	1	0	0	0	0
ENSG00000079134.12	377	461	356	348	275	155
ENSG00000079150.18	289	316	154	180	164	148
ENSG00000079156.17	134	149	106	131	112	94
ENSG00000079215.14	3	0	0	0	0	0
ENSG00000079246.16	5333	6900	4372	5291	3972	4170
ENSG00000079257.8	0	0	0	0	0	0
ENSG00000079263.19	2	4.07	0	0	0	1
ENSG00000079277.21	187	196	230	272	270	255
ENSG00000079308.19	769	650	547	552	527	624
ENSG00000079313.15	597	754	718	654	606	764
ENSG00000079332.15	1053	1104	1059	1059	1110	855
ENSG00000079335.20	103	64	78	85	88	58
ENSG00000079337.16	21	18	26	25	26	23
ENSG00000079385.22	6	1	2	0	6	0
ENSG00000079387.14	344	495	448	382	383	279
ENSG00000079393.20	0	0	2	1	0	1
ENSG00000079432.7	1316	1862	2087	1934	1838	2124
ENSG00000079435.10	125	213	136	177	138	205
ENSG00000079459.13	1609	1767	1459	2165	1130	2480
ENSG00000079462.7	760	1205	1138	1249	1077	1617
ENSG00000079482.13	137	93	128	84	119	167
ENSG00000079557.5	0	0	0	0	0	2
ENSG00000079616.13	1356	2191	1134	1514	719	1487
ENSG00000079689.14	14	6	132	75	387	44
ENSG00000079691.18	77	67	75	89	81	59
ENSG00000079739.17	912	774	897	740	848	907
ENSG00000079785.15	1477	2139	1664	1772	1516	819
ENSG00000079805.17	1582	1775	1550	1889	1460	2065
ENSG00000079819.19	0	0	1	1	6	2
ENSG00000079841.18	120	86	105	103	79	109
ENSG00000079931.15	0	0	0	0	0	0
ENSG00000079950.14	185	111	123	136	137	110
ENSG00000079974.17	300.47	449.54	475.23	561.28	536.54	542.89
ENSG00000079999.14	394	1058	983	1250	1035	1472
ENSG00000080007.8	0	0	0	0	0	0
ENSG00000080031.10	53	53	392	427	407	561
ENSG00000080166.16	13	4	2	2	0	1
ENSG00000080189.15	751	876	901	1162	799	1155
ENSG00000080200.10	218	182	170	134	298	68
ENSG00000080224.17	42	15	36	17	39	18
ENSG00000080293.10	0	0	0	0	0	0
ENSG00000080298.15	655	448	488	467	465	209
ENSG00000080345.18	1171	1352	1046	761	821	327
ENSG00000080371.6	350	318	485	347	374	291
ENSG00000080493.17	0	0	0	0	0	0
ENSG00000080503.24	557	564	565	551	570	467
ENSG00000080511.5	0	0	0	0	0	0
ENSG00000080546.13	568	446	296	332	309	274
ENSG00000080561.13	0	0	0	0	4	0
ENSG00000080572.13	0	0	0	0	0	0
ENSG00000080573.7	0	0	0	0	0	0
ENSG00000080603.17	1111.02	1386.02	975.83	1209.71	966.19	1115
ENSG00000080608.10	659	725	378	356	348	129
ENSG00000080618.16	0	0	0	4	0	3
ENSG00000080644.16	929	1168	810	894	1507	1180
ENSG00000080709.16	1	0	0	0	0	1
ENSG00000080802.18	345	303	361	298	338	301
ENSG00000080815.19	886	600	997	1059	1181	1203
ENSG00000080819.9	249	236	194	233	229	208
ENSG00000080822.17	1161	967	1152	1250	1072	987
ENSG00000080823.23	54	74	174	153	157	248
ENSG00000080824.19	8784	15733	8631	8837	8133	4694
ENSG00000080839.12	181	284	193	188	118	75
ENSG00000080845.17	1883	1319	1622	1267	1338	1494
ENSG00000080854.15	2342	2919	3441	2884	3076	3381
ENSG00000080910.13	0	0	0	0	0	0
ENSG00000080947.15	165	146.97	375	195	388	226
ENSG00000080986.13	338	511	282	230	175	134
ENSG00000081014.11	219	264	255	232	221	125
ENSG00000081019.13	464	383	383	313	363	288
ENSG00000081026.19	692	730	1548	1154	1078	1006
ENSG00000081041.9	0	0	0	0	0	0
ENSG00000081051.8	0	0	0	1	0	0
ENSG00000081052.13	3	0	4	8	5	2
ENSG00000081059.20	257	359	756	703	525	654
ENSG00000081087.15	198	199	296	326	369	227
ENSG00000081138.14	3	1	1	0	0	0
ENSG00000081148.12	0	1	13	12	16	6
ENSG00000081154.12	1625	1406	1195	1303	990	677
ENSG00000081177.18	499	517	516	593	582	674
ENSG00000081181.8	322	334	158	202	195	241
ENSG00000081189.16	110	83	34	41	39	32
ENSG00000081237.20	3	2	1	2	0	2
ENSG00000081248.11	0	0	0	0	0	0
ENSG00000081277.13	0	0	0	0	0	0
ENSG00000081307.12	489	571	427	404	385	212
ENSG00000081320.11	138	84	85	57	54	51
ENSG00000081377.17	573	425	481	523	481	349
ENSG00000081386.12	285	311	312	290	323	232
ENSG00000081479.15	4	1	1	0	0	1
ENSG00000081665.14	281	168	269	193	211	158
ENSG00000081692.12	243	444	394	514	402	693
ENSG00000081721.12	258	404	350	410	317	280
ENSG00000081760.17	373	396	529	472	400	491
ENSG00000081791.9	806	875	922	873	869	897
ENSG00000081800.9	0	0	0	0	0	0
ENSG00000081803.16	7	2	0	0	0	0
ENSG00000081818.4	173	148	205	214	246	209
ENSG00000081842.18	46.35	8.97	13.69	8.34	14.13	2.21
ENSG00000081853.15	10.13	23	60.61	82.39	61.72	60.48
ENSG00000081870.11	156	269	188	248	137	147
ENSG00000081913.14	400	279	267	293	263	308
ENSG00000081923.15	7	5	4	15	59	2
ENSG00000081985.12	11	11	1	1	1	0
ENSG00000082014.16	604	448	702	822	1070	984
ENSG00000082068.9	362	296	213	330	215	262
ENSG00000082074.18	0	0	0	0	0	0
ENSG00000082126.18	0	0	58	32	42	39
ENSG00000082146.13	300	368	363.92	380.96	304	256.96
ENSG00000082153.18	1652.75	3158	2869.96	2914.53	2585.94	1462.99
ENSG00000082175.15	0	0	0	0	0	0
ENSG00000082196.20	100	44.19	80.97	67.05	67	36.55
ENSG00000082212.13	1190	984	581	627	595	442
ENSG00000082213.18	370	280	292	306	308	270
ENSG00000082258.13	689	674	719	603	703	327
ENSG00000082269.16	223	160	99	88	84	41
ENSG00000082293.13	5	1	1	0	3	0
ENSG00000082397.17	1	1	2	3	0	0
ENSG00000082438.17	106	68	14	18	18	4
ENSG00000082458.12	220	253	67	99	85	105
ENSG00000082482.13	2	0	3	4	1	2
ENSG00000082497.12	288	524	267	316	47	221
ENSG00000082512.15	720	496	453	305	458	185
ENSG00000082515.18	196	259	106	176	108	164
ENSG00000082516.9	635	623	383	338	328	477
ENSG00000082556.13	0	1	1	0	0	0
ENSG00000082641.16	2116	3437	2972	3958	3429	4159
ENSG00000082684.16	103	61	66	71	42	115
ENSG00000082701.16	1080	1266	1603	1299	1551	994
ENSG00000082781.12	71	59	180	258	129	242
ENSG00000082805.20	681	944	1072	1107	1186	1416
ENSG00000082898.17	3928	3715	2621	2169	2411	1290
ENSG00000082929.8	0	0	30	68	61	50
ENSG00000082996.19	282	283	233	261	234	122
ENSG00000083067.22	0	0	0	4	0	0
ENSG00000083093.10	186	291	269	206	201	167
ENSG00000083097.14	389	286	495	354	478	217
ENSG00000083099.11	387	385	486	400	495	372
ENSG00000083123.15	280	238	195	237	198	158
ENSG00000083168.11	966	1132	947	891	882	927
ENSG00000083223.18	234	212	214	196	239	114
ENSG00000083290.20	709	579	674	661	674	626
ENSG00000083307.12	0	0	0	0	0	0
ENSG00000083312.17	3801	2909	2413	2379	1952	1607
ENSG00000083444.17	703	933	813	808	914	1021
ENSG00000083454.22	44.42	38.63	15.48	15.51	15.24	17
ENSG00000083457.12	121	217	168	200	145	136
ENSG00000083520.15	1296	974	911	903	848	476
ENSG00000083535.16	254	237	151	155	216	80
ENSG00000083544.15	344	226	203	185	184	111
ENSG00000083622.8	0	0	0	0	0	0
ENSG00000083635.8	230	190	136	154	135	103
ENSG00000083642.19	736	774	646	657	560	299
ENSG00000083720.13	408	647	369	429	396	287
ENSG00000083750.12	53	87	121	170	158	167
ENSG00000083782.8	0	0	0	0	0	0
ENSG00000083799.17	352	343	404	426	432	288
ENSG00000083807.10	129	153	123	161	98	186
ENSG00000083812.12	287.87	423.45	447.87	497.79	424.86	624.31
ENSG00000083814.13	6	2	8	0	7	1
ENSG00000083817.9	69	57	82	98	82	116
ENSG00000083828.16	90	81	105	67	90	52
ENSG00000083838.16	197.27	266.83	322.32	446.76	371	460.8
ENSG00000083844.10	557	273	481	325	451	265
ENSG00000083845.9	13280	12975	6115	10201	6362	12000
ENSG00000083857.14	1645	1594	302	305	271	258
ENSG00000083896.12	846	1008	749	835	705	524
ENSG00000083937.9	93	146	145	124	153	113
ENSG00000084070.12	432	454	426	491	399	547
ENSG00000084072.17	786	858	503	806	520	762
ENSG00000084073.9	333	505	569	626	576	234
ENSG00000084090.13	1516	2014	1526	1590	1385	1653
ENSG00000084092.7	807	481	313	350	286	537
ENSG00000084093.18	372	406	492	359	571	194
ENSG00000084110.11	2	10	4	2	0	4
ENSG00000084112.15	561	762	1035	916	847	1004
ENSG00000084207.18	3686	5901	3055	4032	2956	4051
ENSG00000084234.17	3655	3208	3130	4088	3950	3941
ENSG00000084444.14	506	238	205	171	231	288
ENSG00000084453.16	88	41	64	67	64	34
ENSG00000084463.8	1453	1641	1187	1288	1004	1175
ENSG00000084623.11	3191	1948	1755	1299	1396	2770
ENSG00000084628.10	723	961	844	824	732	1128
ENSG00000084636.18	185	166	58	62	68	100
ENSG00000084652.16	993	1420	1410	1449	1334	1694
ENSG00000084674.15	0	16	1	32	1	36
ENSG00000084676.15	477	487	822	720	848	670
ENSG00000084693.16	1465	1251	1072	1292	1170	1765
ENSG00000084710.14	654	891	1450	1393	1158	1548
ENSG00000084731.15	1847	2319	3111	3192	2712	4168
ENSG00000084733.11	1629	2028	1887	1932	1994	1640
ENSG00000084734.9	9	1	1	4	6	1
ENSG00000084754.12	4354	2804	2303	2295	2189	2951
ENSG00000084764.12	410	374	531	724	660	884
ENSG00000084774.14	2500	2710	1401	1278	1356	1681
ENSG00000085063.17	756	731.96	904.14	1018	1072.8	992
ENSG00000085117.12	28	13	6	28	15	26
ENSG00000085185.15	862	860	1017	757	1128	1402
ENSG00000085224.22	2259	1998	2279	1676	2133	775
ENSG00000085231.14	171.93	221	90.49	110.94	107	62.1
ENSG00000085265.11	0	0	0	0	0	0
ENSG00000085274.15	295	277	269	292	303	151
ENSG00000085276.19	26	27	6	8	3	2
ENSG00000085365.18	946	636	636	595	647	352
ENSG00000085377.14	888	769	654	682	717	634
ENSG00000085382.12	432	273	361	335	352	178
ENSG00000085415.16	608	748	495	591	474	452
ENSG00000085433.15	392	399	559	410	511	332
ENSG00000085449.15	455	385.07	378.85	351	415	226
ENSG00000085465.13	37	9	9	9	2	4
ENSG00000085491.17	490	622	696	629	636	349
ENSG00000085511.20	487	477	372	337	320	285
ENSG00000085514.16	15	19	20	11	20	9
ENSG00000085552.17	957	1343	1014	862	754	961
ENSG00000085563.15	2137	1361	4653	3988	4966	2831
ENSG00000085644.14	486	399	481	506	541	667
ENSG00000085662.14	2484	3912	1973	2501	1694	2911
ENSG00000085719.13	1131	946	915	882	969	808
ENSG00000085721.13	843.83	898.87	786	922.5	841.51	632.12
ENSG00000085733.16	1793	2622	2611	2891	2571	2428
ENSG00000085741.13	9	0	1	2	4	3
ENSG00000085760.15	417	320	218	166	205	81
ENSG00000085788.14	817	741	770	743	773	656
ENSG00000085831.15	87	74	44	64	43	80
ENSG00000085832.17	1045	518	635	535	733	406
ENSG00000085840.13	242	522	228	255	106	315
ENSG00000085871.9	33	36	21	42	53	55
ENSG00000085872.15	2094	1949	1488	1446	1175	1653
ENSG00000085978.22	381	475	324	351	338	434
ENSG00000085982.13	399	345	532	598	565	387
ENSG00000085998.14	943	1080	1155	1315	1240	1723
ENSG00000085999.13	360	766	389	335	168	357
ENSG00000086015.22	1697	1275	1166	1251	1000	1401
ENSG00000086061.16	1468	3376	2860	3118	2417	2248
ENSG00000086062.12	204	200	272	254	292	265
ENSG00000086065.14	905	956	618	1079	698	753
ENSG00000086102.19	502	622	470	418	380	453
ENSG00000086159.13	3	1	16	34	23	33
ENSG00000086189.10	481	473	320	295	323	215
ENSG00000086200.16	247.41	374	182	174	179	112
ENSG00000086205.18	0	0	0	0	0	0
ENSG00000086232.13	4254	4110	3196	2994	2741	3293
ENSG00000086288.12	0	0	0	0	0	0
ENSG00000086289.12	319	410	346	441	444	312
ENSG00000086300.16	85	40	24	55	24	22
ENSG00000086475.15	869	1598	1256	1548	1083	1190
ENSG00000086504.17	576	1070	676	1239	856	1470
ENSG00000086506.3	68	36	48	36	37	103
ENSG00000086544.3	142	168	194	238	208	314
ENSG00000086548.9	0	0	0	0	0	0
ENSG00000086570.12	27	9	11	20	20	9
ENSG00000086589.12	621	674	642	627	525	636
ENSG00000086598.11	1303	1302	1116	1492	1167	1139
ENSG00000086619.14	251	72	121	105	94	51
ENSG00000086666.19	639	561	664	745	606	489
ENSG00000086696.11	0	0	0	0	0	0
ENSG00000086712.13	420	500	316	328	320	206
ENSG00000086717.18	171	157	222	212	163	127
ENSG00000086730.17	7	5	18	7	10	11
ENSG00000086758.16	4462	4838	4024	3562	3527	4736
ENSG00000086827.9	201	344	228	193	181	133
ENSG00000086848.15	380	340	471	400	360	407.95
ENSG00000086967.10	4	0	1	0	1	3
ENSG00000086991.13	31	28	42	26	22	10
ENSG00000087008.16	191	201	210	213	166	275
ENSG00000087053.19	838	711	772	740	775	528
ENSG00000087074.8	223	312	344	445	356	541
ENSG00000087076.9	142	60	87	132	96	205
ENSG00000087077.14	13	6	17	19	21	16
ENSG00000087085.15	290	103	357	459	840	1037
ENSG00000087086.15	6180	4974	5034	6615	6620	11172
ENSG00000087087.20	1237	2980	1732	1943	1536	1616
ENSG00000087088.20	525	963	684	942	806	1033
ENSG00000087095.13	185	150	165	155	189	145
ENSG00000087111.21	892	784	818	714	748	877
ENSG00000087116.16	57	26	335	360	375	458
ENSG00000087128.10	0	0	0	0	0	0
ENSG00000087152.15	940	1599	1514	2158	1628	2733
ENSG00000087157.19	710	859	787	964	724	1170
ENSG00000087191.13	1456	3093	2137	2701	1871	2260
ENSG00000087206.17	332	354	239	279	199	212
ENSG00000087237.12	0	0	0	2	0	1
ENSG00000087245.13	3392	2448	4660	5014	4383	4615
ENSG00000087250.9	0	0	0	0	0	0
ENSG00000087253.13	391	251.99	358	316	255	218
ENSG00000087258.15	1785	1479	1188	1173	1077	1356
ENSG00000087263.17	562	593	469	430	447	491
ENSG00000087266.17	957	1044	876	859	845	896
ENSG00000087269.16	509	815	327	375	268	387
ENSG00000087274.17	1945	2484	3475	3743	3291	4153
ENSG00000087299.12	301	253	140	139	146	156
ENSG00000087301.9	417	200	287	277	254	256
ENSG00000087302.9	1009	908	688	746	640	480
ENSG00000087303.18	115	35	53	56	68	21
ENSG00000087338.5	589	537	507	389	391	307
ENSG00000087365.16	5328	5042	2885	3956	2636	4340
ENSG00000087448.11	573	639	890	715	742	611
ENSG00000087460.25	16083	17807	23700	20677	20602	26908
ENSG00000087470.18	1309	1250	1318	1078	1283	597
ENSG00000087494.16	0	0	2	3	7	0
ENSG00000087495.17	324	283	297	269	203	260
ENSG00000087502.18	187	210	149	168	158	70
ENSG00000087510.7	0	0	0	0	0	0
ENSG00000087586.17	527	609	256	247	161	215
ENSG00000087589.16	0	0	1	0	0	0
ENSG00000087842.11	211	307	222	340	143	263
ENSG00000087884.14	80	137	99	156	103	110
ENSG00000087903.13	193	122	115	93	100	143
ENSG00000087995.16	713.91	525.15	505.84	479.87	481.13	755.46
ENSG00000088002.12	4	0	2	2	12	5
ENSG00000088035.18	94	90	90	53	71	50
ENSG00000088038.19	916	995	924	822	687	788
ENSG00000088053.11	0	0	0	1	0	2
ENSG00000088179.9	428	338	385	343	435	214
ENSG00000088205.13	1730	1940	1079	1187	1052	514
ENSG00000088247.17	2755	3932	2285	2957	1917	3060
ENSG00000088256.9	643	1356	1327	1484	1104	1850
ENSG00000088280.19	430	477	512	558	602	746
ENSG00000088298.13	206	112	127	131	130	189
ENSG00000088305.18	222	268	123	124	75	126
ENSG00000088320.4	0	0	0	0	0	0
ENSG00000088325.16	1926	2285	1038	913	714	950
ENSG00000088340.17	207	31	189	147	196	134
ENSG00000088356.6	197	391	238	399	232	425
ENSG00000088367.23	871	755	911	942	920	1341
ENSG00000088386.17	0	0	0	0	0	0
ENSG00000088387.19	357	185	262	332	120	334
ENSG00000088448.14	694	620	912	1020	818	538
ENSG00000088451.11	114	111	89	61	62	47
ENSG00000088538.13	16	9	9	10	4	10
ENSG00000088543.15	292	357	384	446	369	658
ENSG00000088682.14	441	736	649	693	576	764
ENSG00000088726.16	0	0	0	0	0	0
ENSG00000088727.12	43	83	60	91	64	74
ENSG00000088756.12	84	87	154	172	177	67
ENSG00000088766.12	369	512.43	416	451	453	281
ENSG00000088782.5	0	0	0	0	0	0
ENSG00000088808.18	238	215	474	383	438	539
ENSG00000088812.18	942	890	877	968	1114	1012
ENSG00000088826.18	69	150	99	116	84	164
ENSG00000088827.12	6	0	1	0	3	3
ENSG00000088832.17	986	1673	1105	1666.99	1284	1510.98
ENSG00000088833.17	711	811	655	986	629	1085
ENSG00000088836.14	139	51	25	26	63	44
ENSG00000088854.12	510	397	621	659	702	627
ENSG00000088876.13	298	316.4	206.71	205.25	204	225.62
ENSG00000088881.21	875	659	1283	1318	1496	1896
ENSG00000088882.8	2117	1813	1783	2085	1941	2057
ENSG00000088888.18	1211	1173	1559	1390	1502	1907
ENSG00000088899.15	717	460	793	1024	933	1451
ENSG00000088926.14	0	0	0	0	0	0
ENSG00000088930.8	2124	2275	1553	1908	1536	1484
ENSG00000088970.16	483	166	86	90	73	42
ENSG00000088986.11	831	2210	1590	1890	1586	2021
ENSG00000088992.18	3	4	0	1	0	2
ENSG00000089006.16	673	683	410	519	379	311
ENSG00000089009.15	20737.3	14300.2	9928.3	14091.2	9548.89	11438.3
ENSG00000089012.14	0	1	0	0	0	0
ENSG00000089022.14	562	715.05	630.17	680.95	623.3	509.58
ENSG00000089041.17	237	123	98	92	68	159
ENSG00000089048.14	297	287	184	141	175	63
ENSG00000089050.16	502	504	381	427	438	445
ENSG00000089053.13	1729	1726	1099	1255	1073	1053
ENSG00000089057.15	686	543	994	900	845	808
ENSG00000089060.11	112	103	101	164	142	184
ENSG00000089063.15	858	1005	1080	1323	1131	1157
ENSG00000089091.16	87	79	126	122	138	150
ENSG00000089094.19	681	902	788	644	634	830
ENSG00000089101.19	0	2	0	5	4	2
ENSG00000089116.4	0	0	0	0	0	0
ENSG00000089123.16	79	118	89	95	68	71
ENSG00000089127.13	7	20	25	29	16	47
ENSG00000089154.11	4305	5431	3170	3133	2952	4143
ENSG00000089157.16	31312.5	26249	11586.8	16041.7	12395	19044
ENSG00000089159.16	495	542	507	463	521	460
ENSG00000089163.4	36	21	14	20	17	23
ENSG00000089169.15	328	416	259	169	209	501
ENSG00000089177.18	211	204	193	139	155	86
ENSG00000089195.15	334	729	370	500	332	260
ENSG00000089199.10	2266	3365	2655	4694	2111	6346
ENSG00000089220.5	1779	3106	1831	2470	1795	2627
ENSG00000089225.20	0	0	0	0	0	0
ENSG00000089234.16	378	350	348	342	331	331
ENSG00000089248.7	822	1172	691	1203	761	1466
ENSG00000089250.19	5	23	131	285	115	1160
ENSG00000089280.19	3221	11432	5164	8124	3768	5751
ENSG00000089289.16	797	446	400	575	371	752
ENSG00000089327.15	1	1	6	0	4	1
ENSG00000089335.21	479	483	573	570	579	371
ENSG00000089351.14	3122	1588	1427	1452	1366	1641
ENSG00000089356.18	0	0	0	0	0	0
ENSG00000089472.16	1	2	3	0	2	0
ENSG00000089486.17	559	602	636	652	582	897
ENSG00000089505.17	27.89	38.95	21	15.59	18	13.87
ENSG00000089558.9	202	127	53	48	57	76
ENSG00000089597.18	3835	4923	4467	5455	4526	5835
ENSG00000089639.11	484	372	466	453	519	659
ENSG00000089682.16	152	175	145	108	101	39
ENSG00000089685.15	1189	2355	879	1167	494	843
ENSG00000089692.9	21	18	39	9	28	9
ENSG00000089693.10	2291	2980	2321	3152	2406	3582
ENSG00000089723.10	142	94	95	88	101	127
ENSG00000089737.17	1500	2281	1234	1491	1124	1479
ENSG00000089775.11	335	184	248	179	345	176
ENSG00000089818.18	381.88	379	313	435	389	429
ENSG00000089820.16	193	139	307	321	278	311
ENSG00000089847.12	29	7	11	19	13	21
ENSG00000089876.12	389	350	322	317	267	243
ENSG00000089902.10	691	641	737	621	570	565
ENSG00000089916.18	1065	726	832	698	751	579
ENSG00000090006.18	1755	686	1170	987	1467	1119
ENSG00000090013.11	162	63	97	166	114	263
ENSG00000090020.11	139	167	183	157	161	156
ENSG00000090054.15	691	558	506	566	613	490
ENSG00000090060.18	1884	1960	1657	1605	1583	820
ENSG00000090061.17	707	706	597	563	516	549
ENSG00000090097.21	1262	1570	2095	2848	2212	2775
ENSG00000090104.12	0	0	0	0	0	0
ENSG00000090238.12	681	336	709	705	612	1071
ENSG00000090263.16	392	522	263	452	256	442
ENSG00000090266.13	446	1438	822	1396	739	1293
ENSG00000090273.14	1085	2259	1124	1461	963	1678
ENSG00000090316.16	702	1291	1132	1239	1052	1314
ENSG00000090339.9	2	0	0	3	43	19
ENSG00000090372.15	2246	2754	2600	3317	2176	3346
ENSG00000090376.11	2	1	1	2	1	0
ENSG00000090382.7	0	0	1	0	0	0
ENSG00000090402.8	0	0	0	0	0	0
ENSG00000090432.7	315	341	460	633	461	709
ENSG00000090447.12	359	387	205	259	154	267
ENSG00000090470.15	633	500	490	423	414	536
ENSG00000090487.11	1000	816	615	708	547	797
ENSG00000090512.12	0	0	0	0	0	0
ENSG00000090520.11	471	643.67	713	790.4	634.22	469.04
ENSG00000090530.10	0	0	1	0	0	0
ENSG00000090534.20	2	0	0	1	9	7
ENSG00000090539.15	41	11	92	52	109	72
ENSG00000090554.13	25	8.42	9.24	11.18	17.64	30.31
ENSG00000090565.17	597	861	982	935	816	1086
ENSG00000090581.10	358	374	391	579	421	599
ENSG00000090612.22	232	295	322	272	290	131
ENSG00000090615.15	909	914	1569	1238	1428	1243
ENSG00000090621.14	2320	2497	2194	2256	2045	1819
ENSG00000090659.18	0	0	0	0	0	0
ENSG00000090661.12	235	202	285	376	383	567
ENSG00000090674.16	232	385	406	447	397	550
ENSG00000090686.16	1052	1038	846	792	873	489
ENSG00000090776.6	170	240	67	106	121	145
ENSG00000090857.14	768.29	984.33	1004.75	1091.28	959.56	1190.62
ENSG00000090861.16	1205	1497	1161	1311	1079	2098
ENSG00000090863.12	1848	1587	2036	1882	2048	2016
ENSG00000090889.12	943	1181	779	793	551	600
ENSG00000090905.19	1102	1557	1609	1379	1339	857
ENSG00000090924.15	600	851	1644	1261	1474	1136
ENSG00000090932.11	404	265	146	277	134	268
ENSG00000090971.5	637	788	642	999	689	1078
ENSG00000090975.12	79	49	54	57	119	116
ENSG00000090989.18	698	586	680	620	734	403
ENSG00000091009.8	611.76	526.8	435.54	433.52	409.83	268.61
ENSG00000091010.6	1	1	5	1	0	5
ENSG00000091039.17	840	923	1358	1429	1458	540
ENSG00000091073.19	245.61	180.43	254.79	201.87	245.03	324.65
ENSG00000091106.19	18	21	8	5	14	3
ENSG00000091127.14	451	600	298	273	308	139
ENSG00000091128.13	0	10	3	0	8	0
ENSG00000091129.21	3113	2371	3672	2163	3201	1360
ENSG00000091136.14	4269	3665	3265	3557	3586	2378
ENSG00000091137.14	0	0	2	1	3	0
ENSG00000091138.13	0	0	0	0	0	0
ENSG00000091140.14	1099	1247	1170	1173	1185	560
ENSG00000091157.13	279	254	215	224	189	175
ENSG00000091164.13	896	723	532	628	557	617
ENSG00000091181.19	0	0	1	0	2	0
ENSG00000091262.15	16	13	31.92	26.56	23	18.74
ENSG00000091317.8	510	527	689	881	806	756
ENSG00000091409.15	68	53	28	23	39	8
ENSG00000091428.18	167	138	248	256	624	123
ENSG00000091436.17	380	375	291	338	296	188
ENSG00000091482.8	0	0	0	0	0	0
ENSG00000091483.7	1071	1457	893	1045	883	921
ENSG00000091490.11	17	12	54	27	35	52
ENSG00000091513.16	16	23	4	27	2	26
ENSG00000091527.15	1356	1152	1022	1048	1122	731
ENSG00000091536.19	27	6	25	18	15	28
ENSG00000091542.9	1000	969	941	980	905	1028
ENSG00000091583.11	0	9	0	20	0	41
ENSG00000091592.16	4.75	12.67	10.36	24.45	16.75	22.94
ENSG00000091622.16	35	40	40	40	32	35
ENSG00000091640.8	358	499	301	560	327	423
ENSG00000091651.9	316	520	365	352	203	356
ENSG00000091656.19	441	479	643	534	410	443
ENSG00000091664.9	0	0	0	0	0	0
ENSG00000091704.10	18	16	2	11	0	16
ENSG00000091732.17	486	542	424	425	379	478
ENSG00000091831.23	12	8	11	12	9	2
ENSG00000091844.8	324	203	222	188	229	115
ENSG00000091879.14	9	8	20	21	18	15
ENSG00000091947.10	359	236	202	270	195	448
ENSG00000091972.18	321	377	399.09	439	428	430
ENSG00000091986.15	21	6	6	22	24	14
ENSG00000092009.10	0	0	0	0	0	0
ENSG00000092010.15	591	539	743	828	803	1099
ENSG00000092020.10	416	421	287	349	275	167
ENSG00000092036.18	357.35	372.65	224.11	304.46	204.44	414.91
ENSG00000092051.17	1749	1888	1871	1793	1841	2159
ENSG00000092054.13	0	3	1	1	1	2
ENSG00000092067.5	0	0	0	0	0	0
ENSG00000092068.20	2	0	0	0	0	0
ENSG00000092094.11	143	295	258	338	303	284
ENSG00000092096.17	1530	1196	2442	3234	2475	4230
ENSG00000092098.17	590.2	565.94	611.18	659.4	766.56	1028.52
ENSG00000092108.21	453	341	399	345	398	105
ENSG00000092140.16	593	482	380	285	351	122
ENSG00000092148.13	1380	1558	1584	1216	1486	785
ENSG00000092199.17	4760	7756	3342	5103	3178	4929
ENSG00000092200.12	2	0	0	3	1	2
ENSG00000092201.10	4086	4946	2970	3137	2780	2172
ENSG00000092203.15	836	812	793	947	929	1170
ENSG00000092208.17	75	95	55	45	36	36
ENSG00000092295.12	49	35	15	5	15	8
ENSG00000092330.18	273	344	441	500	492	765
ENSG00000092345.14	0	0	0	0	0	0
ENSG00000092377.15	0	0	0	0	0	0
ENSG00000092421.16	238	216	102	148	55	124
ENSG00000092439.16	567	543	617	456	563	255
ENSG00000092445.12	490	405	283	354	292	475
ENSG00000092470.12	258	394	344	310	199	338
ENSG00000092529.25	5	5.45	7.67	9	13	8
ENSG00000092531.10	115	186	115	185	175	109
ENSG00000092607.15	0	0	0	0	0	0
ENSG00000092621.12	1367	2106	1494	2158	1752	2482
ENSG00000092758.18	6	11	10	7	6	5
ENSG00000092820.18	981	1271	1018	1211	1212	1408
ENSG00000092841.19	1175	3059	3639	7103	4231	8405
ENSG00000092847.13	910	1073	946	975	838	828
ENSG00000092850.12	24	45	38	46	20	43
ENSG00000092853.14	346	753	708	478	345	278
ENSG00000092871.17	452.9	383	513	415	404	453
ENSG00000092929.11	307	353	1116	992	1200	981
ENSG00000092931.11	1197	2326	1900	2135	1632	1513
ENSG00000092964.18	2107	2586	3257	2618	2776	2936
ENSG00000092969.12	2.34	16.6	10.74	28.31	10	4.53
ENSG00000092978.11	426	340	412	425	427	228
ENSG00000093000.19	830.99	1187	1117	906	1017	544
ENSG00000093009.11	265	1088	398	635	197	512
ENSG00000093010.14	420	444	294	362	267	468
ENSG00000093072.18	12	2	9	8	14	2
ENSG00000093100.13	262.56	295.62	297.19	315.01	338.16	243.17
ENSG00000093134.15	0	0	0	0	0	0
[truncated: 58,671 more rows]
