# Supplementary material for: Systematic identification and characterization of exon–intron circRNAs
Source: Genome Res. 2024 Mar;34(3):376–93. doi: 10.1101/gr.278590.123 (PMC11067877; doi:10.1101/gr.278590.123)
Supplement: Supplement 10 [file Supplemental_Table_S10.xlsx]

## Sheet: Table S10. Public_dataset
Supplemental Table S10: List of public datasets used in this study
List of isoCirc Oxford Nanopore Technology sequencing data
accession	biosample
SRR10612050	HEK293
SRR10612051	HEK293
SRR10612052	HEK293
SRR10612053	HEK293
SRR10612054	HEK293
SRR10612055	HEK293
SRR10612056	Human_lung
SRR10612057	Human_adrenal
SRR10612058	Human_liver
SRR10612059	Human_kidney
SRR10612060	Human_adipose
SRR10612061	Human_SkMuscle
SRR10612062	Human_SmMuscle
SRR10612063	Human_prostate
SRR10612064	Human_heart
SRR10612065	Human_brain
SRR10612066	Human_testis
SRR10612067	Human_blood
List of polyA-minus RNA-seq data of cellular fractions of 7 human cell lines from ENCODE
cell line	cellular fraction	Experiment_accession
keratinocyte	nuclear	ENCSR000CQO
keratinocyte	cytosolic	ENCSR000CQN
K562	nuclear	ENCSR000CQM
K562	cytosolic	ENCSR000CQL
HepG2	nuclear	ENCSR000CQK
HepG2	cytosolic	ENCSR000CQU
HeLa-S3	nuclear	ENCSR000CQI
HeLa-S3	cytosolic	ENCSR000CQT
endothelial cell of umbilical vein	nuclear	ENCSR000CQH
endothelial cell of umbilical vein	cytosolic	ENCSR000CQS
GM12878	nuclear	ENCSR000CQF
GM12878	cytosolic	ENCSR000CQE
H1	nuclear	ENCSR000CQR
H1	cytosolic	ENCSR000CQQ
List of 244 RNA-seq data from 102 cell/tissue samples for inference of abundance of EIciRNAs in the human transcriptome
Accession	tissue	tissue_type
ENCSR276MMH	adrenal_gland	other
ENCSR754WLW	adrenal_gland	other
ENCSR801MKV	adrenal_gland	other
ENCSR954PZB	adrenal_gland	other
ENCSR954PZB	adrenal_gland	other
CRR026118	bone_marrow	other
SRR3151750	brain	Brain
SRR3151756	brain	Brain
SRR787271	brain	Brain
CRR026085	brain	Brain
ENCSR000AFO	camera_type_eye_fetal	other
ENCSR000AFO	camera_type_eye_fetal	other
SRR3192428	cerebellum_fetal	other
SRR3192427	cerebellum_fetal	other
SRR3151751	colon	other
SRR787273	colon	other
SRR3151757	colon	other
CRR026115	colon	other
SRR3192432	diencephalon_fetal	Brain
SRR3192431	diencephalon_fetal	Brain
ENCSR098BUF	esophagus_muscularis_mucosa	other
ENCSR182CBU	esophagus_muscularis_mucosa	other
ENCSR620LQN	esophagus_muscularis_mucosa	other
ENCSR750ETS	esophagus_muscularis_mucosa	other
ENCSR351OTL	esophagus_squamous_epithelium	other
ENCSR354QPN	esophagus_squamous_epithelium	other
ENCSR474TRG	esophagus_squamous_epithelium	other
ENCSR620LQN	esophagus_squamous_epithelium	other
SRR3192424	frontal_cortex_fetal	Brain
SRR3192425	frontal_cortex_fetal	Brain
ENCSR609NZM	gastrocnemius_medialis	other
ENCSR678TMV	gastrocnemius_medialis	other
ENCSR853BNH	gastrocnemius_medialis	other
ENCSR853BNH	gastrocnemius_medialis	other
ENCSR967JPI	gastrocnemius_medialis	other
ENCSR035SKV	gastroesophageal_sphincter	other
ENCSR485WBR	gastroesophageal_sphincter	other
ENCSR528ZKN	gastroesophageal_sphincter	other
ENCSR740YMS	gastroesophageal_sphincter	other
SRR787274	heart	other
SRR3151752	heart	other
SRR4421689	heart	other
SRR3151758	heart	other
SRR3192434	heart	other
CRR026112	heart	other
SRR1721284	heart_10wk	other
SRR1721285	heart_11wk	other
SRR1721286	heart_17wk	other
SRR1721287	heart_18wk	other
SRR1721288	heart_20wka	other
SRR1721289	heart_20wkb	other
SRR1721290	heart_20wkc	other
SRR3192433	heart_fetal	other
SRR4421789	heart_left_ventricle	other
SRR15365880	hek293t	other
SRR15365881	hek293t	other
SRR15365879	hek293t	other
SRR15365882	hek293t	other
SRR15376825	hog_d0	Brain
SRR15376812	hog_d0	Brain
SRR15376823	hog_d0	Brain
SRR15376824	hog_d0	Brain
SRR15376811	hog_d0	Brain
SRR15376813	hog_d0	Brain
SRR15376814	hog_d12	Brain
SRR15376815	hog_d12	Brain
SRR15376826	hog_d12	Brain
SRR15376827	hog_d12	Brain
SRR15376816	hog_d12	Brain
SRR15376828	hog_d12	Brain
SRR1721291	intestine_10wka	other
SRR1721292	intestine_10wkb	other
SRR1721293	intestine_11wk	other
SRR1721294	intestine_15wk	other
SRR1721295	intestine_17wk	other
SRR1721296	intestine_20wka	other
SRR1721297	intestine_20wkb	other
SRR1297307	ipf_lung	other
SRR1297308	ipf_lung	other
SRR787275	kidney	other
CRR026094	kidney	other
SRR1721298	kidney_10wk	other
SRR1721299	kidney_16wk	other
SRR1721300	kidney_20wk	other
SRR3151759	liver	other
SRR3151753	liver	other
SRR3192439	liver	other
SRR787276	liver	other
CRR026109	liver	other
SRR3192419	liver	other
SRR3192440	liver_fetal	other
ENCSR321PGV	lower_leg_skin	other
ENCSR460YCS	lower_leg_skin	other
ENCSR551NII	lower_leg_skin	other
ENCSR991HIR	lower_leg_skin	other
SRR1297305	lung	other
SRR1297304	lung	other
SRR3151760	lung	other
SRR1297306	lung	other
SRR787277	lung	other
SRR1297309	lung	other
SRR3151754	lung	other
CRR026121	lung	other
SRR1721301	lung_10wka	other
SRR1721302	lung_10wkb	other
SRR1721303	lung_17wka	other
SRR1721304	lung_17wkb	other
SRR1721305	lung_20wka	other
SRR1721306	lung_20wkb	other
SRR3192441	lung_fetal	other
SRR3192442	lung_fetal	other
SRR15376818	m17_d0	Brain
SRR15376831	m17_d0	Brain
SRR15376817	m17_d0	Brain
SRR15376829	m17_d0	Brain
SRR15376819	m17_d0	Brain
SRR15376830	m17_d0	Brain
SRR15376833	m17_d10	Brain
SRR15376834	m17_d10	Brain
SRR15376821	m17_d10	Brain
SRR15376820	m17_d10	Brain
SRR15376822	m17_d10	Brain
SRR15376832	m17_d10	Brain
SRR5048184	mesenchymal_stem_cell_of_the_bone_marrow	other
SRR5048183	mesenchymal_stem_cell_of_the_bone_marrow	other
SRR3192437	metanephros_fetal	other
SRR3192438	metanephros_fetal	other
SRR787278	muscle	other
SRR3192443	occipital_lobe_fetal	Brain
SRR3192444	occipital_lobe_fetal	Brain
ENCSR080HPT	omental_fat_pad	other
ENCSR158KFO	omental_fat_pad	other
ENCSR645TCG	omental_fat_pad	other
ENCSR729CAZ	omental_fat_pad	other
SRR4422136	pancreas	other
SRR4422592	pancreas	other
SRR3192446	parietal_lobe_fetal	Brain
SRR3192445	parietal_lobe	Brain
ENCSR257NIR	peyers_patch	other
ENCSR450BNZ	peyers_patch	other
ENCSR544SAU	peyers_patch	other
ENCSR802HPM	peyers_patch	other
CRR026130	placenta	other
SRR6324444	placenta	other
SRR6324445	placenta	other
SRR6324443	placenta	other
SRR787280	prostate	other
CRR026097	prostate	other
SRR4422158	prostate	other
SRR4421868	prostate	other
SRR4421874	right_lobe_of_liver	other
SRR4421506	right_lobe_of_liver	other
SRR15365886	shsy_5y	Brain
SRR15365883	shsy_5y	Brain
SRR15365884	shsy_5y	Brain
SRR15365885	shsy_5y	Brain
ENCSR812AKX	sigmoid_colon	other
SRR4422344	sigmoid_colon	other
SRR4421313	sigmoid_colon	other
SRR4422379	sigmoid_colon	other
CRR026124	skeletal_muscle_tissue	other
SRR3192454	skeletal_muscle_tissue	other
SRR3192453	skeletal_muscle_tissue_fetal	other
ENCSR000AFG	skin_of_body_fetal	other
ENCSR000AFG	skin_of_body_fetal	other
CRR026127	small_intestine	other
CRR026100	spinal_cord	other
SRR3192452	spinal_cord	other
SRR3192451	spinal_cord_fetal	other
SRR4421642	spleen	other
SRR4422445	spleen	other
CRR026103	spleen	other
SRR4421468	spleen	other
SRR4421334	spleen	other
ENCSR471RUK	stomach	other
ENCSR853WOM	stomach	other
SRR3151761	stomach	other
SRR3151755	stomach	other
CRR026133	stomach	other
SRR3192450	stomach	other
SRR4422210	stomach	other
SRR4421597	stomach	other
SRR3192449	stomach	other
SRR1721307	stomach_10wka	other
SRR1721308	stomach_10wkb	other
SRR1721309	stomach_16wk	other
SRR1721310	stomach_18wk	other
SRR1721311	stomach_20wka	other
SRR1721312	stomach_20wkb	other
SRR1721313	stomach_20wkc	other
ENCSR150QJY	subcutaneous_adipose_tissue	other
ENCSR504NIU	subcutaneous_adipose_tissue	other
ENCSR671WMH	subcutaneous_adipose_tissue	other
ENCSR708VVE	subcutaneous_adipose_tissue	other
ENCSR108MAU	suprapubic_skin	other
ENCSR450ENK	suprapubic_skin	other
ENCSR480SLD	suprapubic_skin	other
ENCSR862RGX	suprapubic_skin	other
SRR3192464	temporal_lobe	Brain
SRR3192463	temporal_lobe_fetal	Brain
CRR026088	testis	testis
SRR4421668	testis	testis
SRR4421667	testis	testis
SRR4422588	testis	testis
SRR4422587	testis	testis
CRR026091	thymus	other
ENCSR023ZXN	thyroid_gland	other
ENCSR023ZXN	thyroid_gland	other
ENCSR238ZZD	thyroid_gland	other
ENCSR238ZZD	thyroid_gland	other
ENCSR532LJV	thyroid_gland	other
ENCSR532LJV	thyroid_gland	other
ENCSR687HJY	thyroid_gland	other
ENCSR687HJY	thyroid_gland	other
ENCSR000AFK	thyroid_gland_fetal	other
ENCSR000AFK	thyroid_gland_fetal	other
ENCSR272UNO	tibial_nerve	Brain
ENCSR648OSR	tibial_nerve	Brain
ENCSR796HLX	tibial_nerve	Brain
ENCSR858QEL	tibial_nerve	Brain
ENCSR000AFL	tongue_fetal	other
ENCSR000AFL	tongue_fetal	other
ENCSR800WIY	transverse_colon	other
SRR4422147	transverse_colon	other
SRR4421756	transverse_colon	other
SRR4422057	transverse_colon	other
ENCSR000AFM	umbilical_cord_fetal	other
ENCSR000AFM	umbilical_cord_fetal	other
SRR4421631	upper_lobe_of_left_lung	other
SRR4421779	upper_lobe_of_left_lung	other
SRR4421758	upper_lobe_of_left_lung	other
SRR4422346	upper_lobe_of_left_lung	other
ENCSR000AEV	urinary_bladder_fetal	other
ENCSR000AEV	urinary_bladder_fetal	other
CRR026106	uterus	other
SRR4422656	uterus	other
SRR4421350	uterus	other
SRR3192461	uterus_fetal	other
SRR3192462	uterus_fetal	other
SRR13142166	testis	testis
SRR13142167	testis	testis
SRR13142168	testis	testis
SRR13142169	testis	testis
SRR13142170	testis	testis
SRR13142171	testis	testis
List of RNase R-treated and poly(A)+ RNA-seq data for analysis of tissue specificity
	CRR
tissue	RNase R	Poly(A)+
Bone Marrow	CRR026118	CRR026119
Brain	CRR026085	CRR026086
Colon	CRR026115	CRR026116
Heart	CRR026112	CRR026113
Kidney	CRR026094	CRR026095
Liver	CRR026109	CRR026110
Lung	CRR026121	CRR026122
Placenta	CRR026130	CRR026131
Prostate	CRR026097	CRR026098
Skeletal Muscle	CRR026124	CRR026125
Small Intestine	CRR026127	CRR026128
Spinal Cord	CRR026100	CRR026101
Spleen	CRR026103	CRR026104
Stomach	CRR026133	CRR026134
Testis	CRR026088	CRR026089
Thymus	CRR026091	CRR026092
Uterus	CRR026106	CRR026107
List of polyA-plus RNA-seq data of human tissues from ENCODE for calculation of correlations between LIR and gene expression level
Experiment accession	File accession	Biosample term name
ENCSR693CSQ	ENCFF346ANG	heart left ventricle
ENCSR693CSQ	ENCFF845KUN	heart left ventricle
ENCSR388ZNJ	ENCFF699TZO	liver
ENCSR388ZNJ	ENCFF707MOR	liver
ENCSR388ZNJ	ENCFF434ZIT	liver
ENCSR388ZNJ	ENCFF061GJD	liver
ENCSR719HRO	ENCFF464VYE	small intestine
ENCSR719HRO	ENCFF009ICZ	small intestine
ENCSR741QEH	ENCFF876NLM	adipose tissue
ENCSR741QEH	ENCFF061ZSB	adipose tissue
ENCSR714KDG	ENCFF381SDS	liver
ENCSR714KDG	ENCFF825RZF	liver
ENCSR249CKG	ENCFF504BTR	chorion
ENCSR249CKG	ENCFF554QBO	chorion
ENCSR699YJR	ENCFF538YBJ	muscle of leg
ENCSR699YJR	ENCFF541APO	muscle of leg
ENCSR338FSZ	ENCFF446YZX	chorion
ENCSR338FSZ	ENCFF112KBZ	chorion
ENCSR329ZRF	ENCFF256DXP	trophoblast
ENCSR329ZRF	ENCFF673ESC	trophoblast
ENCSR980UEY	ENCFF434XND	stomach
ENCSR980UEY	ENCFF419AEM	stomach
ENCSR999CPT	ENCFF993FIL	placental basal plate
ENCSR999CPT	ENCFF969AHN	placental basal plate
ENCSR396GIH	ENCFF700ZXN	sigmoid colon
ENCSR396GIH	ENCFF236PLH	sigmoid colon
ENCSR880XLM	ENCFF262IIP	placenta
ENCSR880XLM	ENCFF150SPZ	placenta
ENCSR714QAF	ENCFF496RMH	mole
ENCSR714QAF	ENCFF199PUI	mole
ENCSR039ICU	ENCFF965YDS	small intestine
ENCSR039ICU	ENCFF345YKH	small intestine
ENCSR104ZDH	ENCFF960VZZ	placental basal plate
ENCSR104ZDH	ENCFF003QOJ	placental basal plate
ENCSR721HDG	ENCFF361XCF	stomach
ENCSR721HDG	ENCFF547FBP	stomach
ENCSR779ZJW	ENCFF778QGB	trophoblast
ENCSR779ZJW	ENCFF740NAJ	trophoblast
ENCSR176FKY	ENCFF469RIZ	trophoblast
ENCSR176FKY	ENCFF719YRA	trophoblast
ENCSR701UNO	ENCFF903TQS	trophoblast
ENCSR701UNO	ENCFF324AAD	trophoblast
ENCSR725TPW	ENCFF016ISI	ovary
ENCSR725TPW	ENCFF306DIV	ovary
ENCSR763NOO	ENCFF216XVM	aorta
ENCSR763NOO	ENCFF084XQU	aorta
ENCSR741MLF	ENCFF207YJR	chorion
ENCSR741MLF	ENCFF075TVU	chorion
ENCSR466XAR	ENCFF654KSY	chorion
ENCSR466XAR	ENCFF930ZEP	chorion
ENCSR663IOE	ENCFF754HOS	spleen
ENCSR663IOE	ENCFF751VBP	spleen
ENCSR825GWD	ENCFF367ZVO	sigmoid colon
ENCSR825GWD	ENCFF989WGG	sigmoid colon
ENCSR146ZKR	ENCFF227KPV	adrenal gland
ENCSR146ZKR	ENCFF149EAW	adrenal gland
ENCSR922VBO	ENCFF299YCQ	stomach
ENCSR922VBO	ENCFF300UEL	stomach
ENCSR555BCP	ENCFF269FOW	adrenal gland
ENCSR555BCP	ENCFF517LIG	adrenal gland
ENCSR046XHI	ENCFF579DSX	ovary
ENCSR046XHI	ENCFF209FDP	ovary
ENCSR906HEV	ENCFF639PCM	muscle of trunk
ENCSR906HEV	ENCFF241WYH	muscle of trunk
ENCSR686JJB	ENCFF413JLW	adipose tissue
ENCSR686JJB	ENCFF297LUV	adipose tissue
ENCSR769LNJ	ENCFF015GRH	heart left ventricle
ENCSR769LNJ	ENCFF646SZM	heart left ventricle
ENCSR445DAC	ENCFF130XAM	chorionic villus
ENCSR445DAC	ENCFF359ROL	chorionic villus
ENCSR718CDN	ENCFF431JUO	adipose tissue
ENCSR718CDN	ENCFF900HHS	adipose tissue
ENCSR448DCX	ENCFF124OIZ	urinary bladder
ENCSR448DCX	ENCFF403EQO	urinary bladder
ENCSR995BHD	ENCFF273RBB	aorta
ENCSR995BHD	ENCFF939QXU	aorta
ENCSR557PFL	ENCFF834DDE	amnion
ENCSR557PFL	ENCFF492OJI	amnion
ENCSR706XCG	ENCFF333XND	placental basal plate
ENCSR706XCG	ENCFF758MCH	placental basal plate
ENCSR439SPU	ENCFF748VWG	heart right ventricle
ENCSR439SPU	ENCFF749LPZ	heart right ventricle
ENCSR680AAZ	ENCFF518PXY	adrenal gland
ENCSR680AAZ	ENCFF605VAB	adrenal gland
ENCSR680AAZ	ENCFF203ZXN	adrenal gland
ENCSR680AAZ	ENCFF322DJR	adrenal gland
ENCSR271DJJ	ENCFF238TXN	endocrine pancreas
ENCSR271DJJ	ENCFF884ZCW	endocrine pancreas
ENCSR571BML	ENCFF494KRC	pancreas
ENCSR571BML	ENCFF091ALA	pancreas
ENCSR066FZL	ENCFF920OIL	large intestine
ENCSR066FZL	ENCFF036XST	large intestine
ENCSR482VRI	ENCFF149EVF	small intestine
ENCSR482VRI	ENCFF146MNX	small intestine
ENCSR542OHE	ENCFF917ZSU	spinal cord
ENCSR542OHE	ENCFF932TEJ	spinal cord
ENCSR817TLH	ENCFF709WUU	psoas muscle
ENCSR817TLH	ENCFF682WYB	psoas muscle
ENCSR433XCV	ENCFF071WUF	heart right ventricle
ENCSR433XCV	ENCFF717QQV	heart right ventricle
ENCSR775KCE	ENCFF418HIM	thymus
ENCSR775KCE	ENCFF437BXM	thymus
ENCSR229JRA	ENCFF717ZOI	thymus
ENCSR229JRA	ENCFF134DAA	thymus
ENCSR910QOX	ENCFF724FPA	spleen
ENCSR910QOX	ENCFF596LUX	spleen
ENCSR510PSL	ENCFF822FJL	spleen
ENCSR510PSL	ENCFF444EHS	spleen
ENCSR598KJX	ENCFF500TSS	adrenal gland
ENCSR598KJX	ENCFF906UKI	adrenal gland
ENCSR999ZCI	ENCFF652AXF	sigmoid colon
ENCSR999ZCI	ENCFF620DRS	sigmoid colon
ENCSR502OTI	ENCFF578ZSP	psoas muscle
ENCSR502OTI	ENCFF330JFM	psoas muscle
ENCSR993QGR	ENCFF860LWY	esophagus
ENCSR993QGR	ENCFF418PCA	esophagus
ENCSR793CEK	ENCFF804WPD	placental basal plate
ENCSR793CEK	ENCFF795UGM	placental basal plate
ENCSR967BBU	ENCFF048JQQ	chorionic villus
ENCSR967BBU	ENCFF239GDI	chorionic villus
ENCSR051QXW	ENCFF810NYF	chorionic villus
ENCSR051QXW	ENCFF340KKR	chorionic villus
ENCSR784PDN	ENCFF114LDR	amnion
ENCSR784PDN	ENCFF284LWM	amnion
ENCSR629VMZ	ENCFF739MYH	pancreas
ENCSR629VMZ	ENCFF828ZID	pancreas
ENCSR518XRJ	ENCFF830NKN	endocrine pancreas
ENCSR518XRJ	ENCFF426LWH	endocrine pancreas
ENCSR843HXR	ENCFF533HNU	psoas muscle
ENCSR843HXR	ENCFF859XYK	psoas muscle
ENCSR278UYN	ENCFF712DYB	lung
ENCSR278UYN	ENCFF906UNV	lung
ENCSR618IQY	ENCFF642CAM	small intestine
ENCSR618IQY	ENCFF620UOK	small intestine
ENCSR675YAS	ENCFF935LMI	right cardiac atrium
ENCSR675YAS	ENCFF450ZEW	right cardiac atrium
ENCSR917YHC	ENCFF608PXO	lung
ENCSR917YHC	ENCFF970BIN	lung
ENCSR470JHE	ENCFF654GII	cerebellum
ENCSR470JHE	ENCFF716MCB	cerebellum
ENCSR534UXT	ENCFF705TFO	amnion
ENCSR534UXT	ENCFF206UJZ	amnion
ENCSR102TQN	ENCFF863CHX	esophagus
ENCSR102TQN	ENCFF275MEC	esophagus
ENCSR560IFD	ENCFF995LER	chorionic villus
ENCSR560IFD	ENCFF132MTE	chorionic villus
List of RBP eCLIP-seq data from ENCODE for comparison of RBP binding on introns retained in EIciRNAs over those spliced
peak		signal (bigWig)
File accession	Description	File accession	Description
ENCFF402DTY.bed	K562_TROVE2_eCLIP_rep1.bed	ENCFF355URY.bigWig	K562_TROVE2_eCLIP_rep1_minus.bigWig
ENCFF507IRG.bed	K562_TROVE2_eCLIP_rep2.bed	ENCFF701ABR.bigWig	K562_TROVE2_eCLIP_rep2_minus.bigWig
ENCFF419MOS.bed	K562_BUD13_eCLIP_rep1.bed	ENCFF220AMQ.bigWig	K562_TROVE2_eCLIP_rep1_plus.bigWig
ENCFF807GJE.bed	K562_BUD13_eCLIP_rep2.bed	ENCFF580LAY.bigWig	K562_TROVE2_eCLIP_rep2_plus.bigWig
ENCFF205JTY.bed	K562_SRSF1_eCLIP_rep2.bed	ENCFF659LQY.bigWig	K562_BUD13_eCLIP_rep2_minus.bigWig
ENCFF373NZF.bed	K562_SRSF1_eCLIP_rep1.bed	ENCFF262ZDM.bigWig	K562_BUD13_eCLIP_rep1_minus.bigWig
ENCFF787NKL.bed	K562_SERBP1_eCLIP_rep1.bed	ENCFF879YZY.bigWig	K562_BUD13_eCLIP_rep2_plus.bigWig
ENCFF058ORL.bed	K562_SERBP1_eCLIP_rep2.bed	ENCFF019MEC.bigWig	K562_BUD13_eCLIP_rep1_plus.bigWig
ENCFF927UFK.bed	K562_SMNDC1_eCLIP_rep1.bed	ENCFF526BKN.bigWig	K562_SRSF1_eCLIP_rep2_minus.bigWig
ENCFF723GHJ.bed	K562_SMNDC1_eCLIP_rep2.bed	ENCFF985WYO.bigWig	K562_SRSF1_eCLIP_rep1_minus.bigWig
ENCFF214SWT.bed	K562_KHDRBS1_eCLIP_rep2.bed	ENCFF137IAG.bigWig	K562_SRSF1_eCLIP_rep1_plus.bigWig
ENCFF738QUP.bed	K562_KHDRBS1_eCLIP_rep1.bed	ENCFF642LZT.bigWig	K562_SRSF1_eCLIP_rep2_plus.bigWig
ENCFF135TAD.bed	K562_METAP2_eCLIP_rep1.bed	ENCFF272WVO.bigWig	K562_SERBP1_eCLIP_rep2_minus.bigWig
ENCFF962CKJ.bed	K562_METAP2_eCLIP_rep2.bed	ENCFF963DCK.bigWig	K562_SERBP1_eCLIP_rep1_minus.bigWig
ENCFF704PUC.bed	K562_FXR1_eCLIP_rep2.bed	ENCFF619XEH.bigWig	K562_SERBP1_eCLIP_rep2_plus.bigWig
ENCFF352KYI.bed	K562_FXR1_eCLIP_rep1.bed	ENCFF072GRP.bigWig	K562_SERBP1_eCLIP_rep1_plus.bigWig
ENCFF450LWH.bed	K562_SBDS_eCLIP_rep2.bed	ENCFF872VFP.bigWig	K562_SMNDC1_eCLIP_rep2_minus.bigWig
ENCFF384NHH.bed	K562_SBDS_eCLIP_rep1.bed	ENCFF563QPR.bigWig	K562_SMNDC1_eCLIP_rep1_minus.bigWig
ENCFF417KUY.bed	K562_SAFB_eCLIP_rep2.bed	ENCFF092WOP.bigWig	K562_SMNDC1_eCLIP_rep1_plus.bigWig
ENCFF067WCL.bed	K562_SAFB_eCLIP_rep1.bed	ENCFF877YKQ.bigWig	K562_SMNDC1_eCLIP_rep2_plus.bigWig
ENCFF965UZI.bed	K562_DDX51_eCLIP_rep1.bed	ENCFF141IVW.bigWig	K562_KHDRBS1_eCLIP_rep2_minus.bigWig
ENCFF584CZB.bed	K562_DDX51_eCLIP_rep2.bed	ENCFF134SUE.bigWig	K562_KHDRBS1_eCLIP_rep1_minus.bigWig
ENCFF496SLO.bed	K562_NSUN2_eCLIP_rep2.bed	ENCFF577PBB.bigWig	K562_KHDRBS1_eCLIP_rep1_plus.bigWig
ENCFF062YKQ.bed	K562_NSUN2_eCLIP_rep1.bed	ENCFF707HNB.bigWig	K562_KHDRBS1_eCLIP_rep2_plus.bigWig
ENCFF558RNJ.bed	K562_MATR3_eCLIP_rep2.bed	ENCFF525AOF.bigWig	K562_METAP2_eCLIP_rep2_minus.bigWig
ENCFF081JME.bed	K562_MATR3_eCLIP_rep1.bed	ENCFF232SDJ.bigWig	K562_METAP2_eCLIP_rep1_minus.bigWig
ENCFF121SHB.bed	K562_DDX52_eCLIP_rep1.bed	ENCFF864WUG.bigWig	K562_METAP2_eCLIP_rep2_plus.bigWig
ENCFF508LHH.bed	K562_DDX52_eCLIP_rep2.bed	ENCFF084TRE.bigWig	K562_METAP2_eCLIP_rep1_plus.bigWig
ENCFF022IWU.bed	K562_PUM1_eCLIP_rep2.bed	ENCFF089JTT.bigWig	K562_FXR1_eCLIP_rep2_minus.bigWig
ENCFF620UYD.bed	K562_PUM1_eCLIP_rep1.bed	ENCFF915SJY.bigWig	K562_FXR1_eCLIP_rep1_minus.bigWig
ENCFF747NRM.bed	K562_DDX6_eCLIP_rep1.bed	ENCFF122DCP.bigWig	K562_FXR1_eCLIP_rep1_plus.bigWig
ENCFF608UGQ.bed	K562_DDX6_eCLIP_rep2.bed	ENCFF149LXR.bigWig	K562_FXR1_eCLIP_rep2_plus.bigWig
ENCFF401XTL.bed	K562_DDX55_eCLIP_rep2.bed	ENCFF141SNV.bigWig	K562_SBDS_eCLIP_rep1_minus.bigWig
ENCFF411WKH.bed	K562_DDX55_eCLIP_rep1.bed	ENCFF937KCE.bigWig	K562_SBDS_eCLIP_rep2_minus.bigWig
ENCFF529RBH.bed	K562_RBM15_eCLIP_rep1.bed	ENCFF060XOS.bigWig	K562_SBDS_eCLIP_rep2_plus.bigWig
ENCFF006CBO.bed	K562_RBM15_eCLIP_rep2.bed	ENCFF945CZJ.bigWig	K562_SBDS_eCLIP_rep1_plus.bigWig
ENCFF871RJA.bed	K562_SAFB2_eCLIP_rep2.bed	ENCFF662PGM.bigWig	K562_SAFB_eCLIP_rep2_minus.bigWig
ENCFF893FMD.bed	K562_SAFB2_eCLIP_rep1.bed	ENCFF686FKT.bigWig	K562_SAFB_eCLIP_rep1_minus.bigWig
ENCFF349HTU.bed	K562_AATF_eCLIP_rep2.bed	ENCFF929GHQ.bigWig	K562_SAFB_eCLIP_rep2_plus.bigWig
ENCFF931DET.bed	K562_AATF_eCLIP_rep1.bed	ENCFF514SFZ.bigWig	K562_SAFB_eCLIP_rep1_plus.bigWig
ENCFF240IEE.bed	K562_AQR_eCLIP_rep2.bed	ENCFF582OJZ.bigWig	K562_DDX51_eCLIP_rep1_minus.bigWig
ENCFF620JUD.bed	K562_AQR_eCLIP_rep1.bed	ENCFF072MQR.bigWig	K562_DDX51_eCLIP_rep2_minus.bigWig
ENCFF672MYG.bed	K562_ZNF800_eCLIP_rep2.bed	ENCFF230UVW.bigWig	K562_DDX51_eCLIP_rep1_plus.bigWig
ENCFF780IYG.bed	K562_ZNF800_eCLIP_rep1.bed	ENCFF286QNA.bigWig	K562_DDX51_eCLIP_rep2_plus.bigWig
ENCFF443KJS.bed	K562_FUS_eCLIP_rep1.bed	ENCFF308FEZ.bigWig	K562_NSUN2_eCLIP_rep1_minus.bigWig
ENCFF565ILV.bed	K562_FUS_eCLIP_rep2.bed	ENCFF349JHA.bigWig	K562_NSUN2_eCLIP_rep2_minus.bigWig
ENCFF516OAW.bed	K562_DROSHA_eCLIP_rep1.bed	ENCFF494YYE.bigWig	K562_NSUN2_eCLIP_rep1_plus.bigWig
ENCFF314RBZ.bed	K562_DROSHA_eCLIP_rep2.bed	ENCFF533YVA.bigWig	K562_NSUN2_eCLIP_rep2_plus.bigWig
ENCFF182HYE.bed	K562_U2AF2_eCLIP_rep1.bed	ENCFF163VTI.bigWig	K562_MATR3_eCLIP_rep1_minus.bigWig
ENCFF405ETO.bed	K562_U2AF2_eCLIP_rep2.bed	ENCFF356OIG.bigWig	K562_MATR3_eCLIP_rep2_minus.bigWig
ENCFF100JBV.bed	K562_HNRNPA1_eCLIP_rep1.bed	ENCFF752ZNH.bigWig	K562_MATR3_eCLIP_rep1_plus.bigWig
ENCFF902IDT.bed	K562_HNRNPA1_eCLIP_rep2.bed	ENCFF597BHN.bigWig	K562_MATR3_eCLIP_rep2_plus.bigWig
ENCFF060IHO.bed	K562_NONO_eCLIP_rep1.bed	ENCFF586YIZ.bigWig	K562_DDX52_eCLIP_rep1_minus.bigWig
ENCFF671OSS.bed	K562_NONO_eCLIP_rep2.bed	ENCFF059IMV.bigWig	K562_DDX52_eCLIP_rep2_minus.bigWig
ENCFF594PWG.bed	K562_PTBP1_eCLIP_rep1.bed	ENCFF036SXG.bigWig	K562_DDX52_eCLIP_rep1_plus.bigWig
ENCFF894KLP.bed	K562_PTBP1_eCLIP_rep2.bed	ENCFF328GNH.bigWig	K562_DDX52_eCLIP_rep2_plus.bigWig
ENCFF454PKM.bed	K562_CPSF6_eCLIP_rep2.bed	ENCFF004UZD.bigWig	K562_PUM1_eCLIP_rep2_minus.bigWig
ENCFF802BJP.bed	K562_CPSF6_eCLIP_rep1.bed	ENCFF868WSG.bigWig	K562_PUM1_eCLIP_rep1_minus.bigWig
ENCFF114YWP.bed	K562_HLTF_eCLIP_rep2.bed	ENCFF425EDT.bigWig	K562_PUM1_eCLIP_rep1_plus.bigWig
ENCFF854GBT.bed	K562_HLTF_eCLIP_rep1.bed	ENCFF802ZLH.bigWig	K562_PUM1_eCLIP_rep2_plus.bigWig
ENCFF394EQW.bed	K562_FXR2_eCLIP_rep1.bed	ENCFF869SIH.bigWig	K562_DDX6_eCLIP_rep1_minus.bigWig
ENCFF237PCI.bed	K562_FXR2_eCLIP_rep2.bed	ENCFF278AZV.bigWig	K562_DDX6_eCLIP_rep2_minus.bigWig
ENCFF220VDV.bed	K562_PPIL4_eCLIP_rep1.bed	ENCFF142GNL.bigWig	K562_DDX6_eCLIP_rep2_plus.bigWig
ENCFF987VIP.bed	K562_PPIL4_eCLIP_rep2.bed	ENCFF625EKI.bigWig	K562_DDX6_eCLIP_rep1_plus.bigWig
ENCFF606CVG.bed	K562_RPS11_eCLIP_rep1.bed	ENCFF022MZM.bigWig	K562_DDX55_eCLIP_rep1_minus.bigWig
ENCFF650CMA.bed	K562_RPS11_eCLIP_rep2.bed	ENCFF017KKV.bigWig	K562_DDX55_eCLIP_rep2_minus.bigWig
ENCFF670VYB.bed	K562_ZC3H8_eCLIP_rep1.bed	ENCFF802ALB.bigWig	K562_DDX55_eCLIP_rep1_plus.bigWig
ENCFF725VLW.bed	K562_ZC3H8_eCLIP_rep2.bed	ENCFF790YXZ.bigWig	K562_DDX55_eCLIP_rep2_plus.bigWig
ENCFF712HCB.bed	K562_SUPV3L1_eCLIP_rep2.bed	ENCFF969UFE.bigWig	K562_RBM15_eCLIP_rep1_minus.bigWig
ENCFF826MPO.bed	K562_SUPV3L1_eCLIP_rep1.bed	ENCFF097EGO.bigWig	K562_RBM15_eCLIP_rep2_minus.bigWig
ENCFF545IBP.bed	K562_WDR43_eCLIP_rep2.bed	ENCFF723XZC.bigWig	K562_RBM15_eCLIP_rep2_plus.bigWig
ENCFF213FHW.bed	K562_WDR43_eCLIP_rep1.bed	ENCFF368JSN.bigWig	K562_RBM15_eCLIP_rep1_plus.bigWig
ENCFF734UNZ.bed	K562_TBRG4_eCLIP_rep1.bed	ENCFF598CPP.bigWig	K562_SAFB2_eCLIP_rep2_minus.bigWig
ENCFF813VYB.bed	K562_TBRG4_eCLIP_rep2.bed	ENCFF705VVX.bigWig	K562_SAFB2_eCLIP_rep1_minus.bigWig
ENCFF276EIU.bed	K562_XRN2_eCLIP_rep2.bed	ENCFF818JEX.bigWig	K562_SAFB2_eCLIP_rep1_plus.bigWig
ENCFF371PMP.bed	K562_XRN2_eCLIP_rep1.bed	ENCFF492OEQ.bigWig	K562_SAFB2_eCLIP_rep2_plus.bigWig
ENCFF150ZOO.bed	K562_RBM22_eCLIP_rep1.bed	ENCFF681TZF.bigWig	K562_AATF_eCLIP_rep2_minus.bigWig
ENCFF899HGF.bed	K562_RBM22_eCLIP_rep2.bed	ENCFF197MAL.bigWig	K562_AATF_eCLIP_rep1_minus.bigWig
ENCFF436FUS.bed	K562_MTPAP_eCLIP_rep1.bed	ENCFF745OPH.bigWig	K562_AATF_eCLIP_rep1_plus.bigWig
ENCFF266NFK.bed	K562_MTPAP_eCLIP_rep2.bed	ENCFF372WIF.bigWig	K562_AATF_eCLIP_rep2_plus.bigWig
ENCFF701ZYH.bed	K562_DDX24_eCLIP_rep2.bed	ENCFF363DGM.bigWig	K562_AQR_eCLIP_rep2_minus.bigWig
ENCFF142OCF.bed	K562_DDX24_eCLIP_rep1.bed	ENCFF535SIF.bigWig	K562_AQR_eCLIP_rep1_minus.bigWig
ENCFF092TPS.bed	K562_EFTUD2_eCLIP_rep2.bed	ENCFF573NET.bigWig	K562_AQR_eCLIP_rep1_plus.bigWig
ENCFF174GUB.bed	K562_EFTUD2_eCLIP_rep1.bed	ENCFF544NMT.bigWig	K562_AQR_eCLIP_rep2_plus.bigWig
ENCFF182RWR.bed	K562_GEMIN5_eCLIP_rep1.bed	ENCFF732MSM.bigWig	K562_ZNF800_eCLIP_rep2_minus.bigWig
ENCFF151VUB.bed	K562_GEMIN5_eCLIP_rep2.bed	ENCFF737BYL.bigWig	K562_ZNF800_eCLIP_rep1_minus.bigWig
ENCFF487EXG.bed	K562_RPS3_eCLIP_rep1.bed	ENCFF028XAW.bigWig	K562_ZNF800_eCLIP_rep2_plus.bigWig
ENCFF546DDF.bed	K562_RPS3_eCLIP_rep2.bed	ENCFF710MTZ.bigWig	K562_ZNF800_eCLIP_rep1_plus.bigWig
ENCFF933LJZ.bed	K562_HNRNPUL1_eCLIP_rep2.bed	ENCFF553EEX.bigWig	K562_FUS_eCLIP_rep2_minus.bigWig
ENCFF490BSS.bed	K562_HNRNPUL1_eCLIP_rep1.bed	ENCFF362UCS.bigWig	K562_FUS_eCLIP_rep1_minus.bigWig
ENCFF669TNM.bed	K562_TARDBP_eCLIP_rep1.bed	ENCFF674POL.bigWig	K562_FUS_eCLIP_rep1_plus.bigWig
ENCFF606RXB.bed	K562_TARDBP_eCLIP_rep2.bed	ENCFF364FLH.bigWig	K562_FUS_eCLIP_rep2_plus.bigWig
ENCFF741UNZ.bed	K562_YWHAG_eCLIP_rep1.bed	ENCFF353HQK.bigWig	K562_DROSHA_eCLIP_rep1_minus.bigWig
ENCFF103TFM.bed	K562_YWHAG_eCLIP_rep2.bed	ENCFF043IMA.bigWig	K562_DROSHA_eCLIP_rep2_minus.bigWig
ENCFF960ILE.bed	K562_LARP7_eCLIP_rep2.bed	ENCFF200MRU.bigWig	K562_DROSHA_eCLIP_rep1_plus.bigWig
ENCFF572IJY.bed	K562_LARP7_eCLIP_rep1.bed	ENCFF150EWC.bigWig	K562_DROSHA_eCLIP_rep2_plus.bigWig
ENCFF408HQB.bed	K562_HNRNPU_eCLIP_rep1.bed	ENCFF765TAB.bigWig	K562_U2AF2_eCLIP_rep1_minus.bigWig
ENCFF638WUB.bed	K562_HNRNPU_eCLIP_rep2.bed	ENCFF712LBW.bigWig	K562_U2AF2_eCLIP_rep2_minus.bigWig
ENCFF050YWD.bed	K562_CSTF2T_eCLIP_rep1.bed	ENCFF524JHH.bigWig	K562_U2AF2_eCLIP_rep2_plus.bigWig
ENCFF647ZVB.bed	K562_CSTF2T_eCLIP_rep2.bed	ENCFF024JFG.bigWig	K562_U2AF2_eCLIP_rep1_plus.bigWig
ENCFF457ETB.bed	K562_FMR1_eCLIP_rep1.bed	ENCFF677OHD.bigWig	K562_HNRNPA1_eCLIP_rep2_minus.bigWig
ENCFF845EEJ.bed	K562_FMR1_eCLIP_rep2.bed	ENCFF520LTV.bigWig	K562_HNRNPA1_eCLIP_rep1_minus.bigWig
ENCFF167VAS.bed	K562_PRPF8_eCLIP_rep1.bed	ENCFF099FEV.bigWig	K562_HNRNPA1_eCLIP_rep1_plus.bigWig
ENCFF996MYF.bed	K562_PRPF8_eCLIP_rep2.bed	ENCFF401DKP.bigWig	K562_HNRNPA1_eCLIP_rep2_plus.bigWig
ENCFF389TCM.bed	K562_ZNF622_eCLIP_rep1.bed	ENCFF011XRH.bigWig	K562_NONO_eCLIP_rep1_minus.bigWig
ENCFF282VKB.bed	K562_ZNF622_eCLIP_rep2.bed	ENCFF661NXQ.bigWig	K562_NONO_eCLIP_rep2_minus.bigWig
ENCFF371SNO.bed	K562_DDX21_eCLIP_rep1.bed	ENCFF715MPQ.bigWig	K562_NONO_eCLIP_rep1_plus.bigWig
ENCFF005ZCI.bed	K562_DDX21_eCLIP_rep2.bed	ENCFF043RMQ.bigWig	K562_NONO_eCLIP_rep2_plus.bigWig
ENCFF578TMK.bed	K562_ZRANB2_eCLIP_rep1.bed	ENCFF617YCT.bigWig	K562_PTBP1_eCLIP_rep1_minus.bigWig
ENCFF263QPA.bed	K562_ZRANB2_eCLIP_rep2.bed	ENCFF799AHI.bigWig	K562_PTBP1_eCLIP_rep2_minus.bigWig
ENCFF188HFB.bed	K562_FAM120A_eCLIP_rep1.bed	ENCFF258TKH.bigWig	K562_PTBP1_eCLIP_rep1_plus.bigWig
ENCFF016RWW.bed	K562_FAM120A_eCLIP_rep2.bed	ENCFF967LWB.bigWig	K562_PTBP1_eCLIP_rep2_plus.bigWig
ENCFF374XQF.bed	K562_KHSRP_eCLIP_rep2.bed	ENCFF443OUZ.bigWig	K562_CPSF6_eCLIP_rep1_minus.bigWig
ENCFF127WMZ.bed	K562_KHSRP_eCLIP_rep1.bed	ENCFF016HQW.bigWig	K562_CPSF6_eCLIP_rep2_minus.bigWig
ENCFF901BYH.bed	K562_DDX3X_eCLIP_rep1.bed	ENCFF503NTY.bigWig	K562_CPSF6_eCLIP_rep2_plus.bigWig
ENCFF381YRZ.bed	K562_DDX3X_eCLIP_rep2.bed	ENCFF094MKS.bigWig	K562_CPSF6_eCLIP_rep1_plus.bigWig
ENCFF193VAQ.bed	K562_NOLC1_eCLIP_rep1.bed	ENCFF136FUR.bigWig	K562_HLTF_eCLIP_rep1_minus.bigWig
ENCFF810IDY.bed	K562_NOLC1_eCLIP_rep2.bed	ENCFF806QVQ.bigWig	K562_HLTF_eCLIP_rep2_minus.bigWig
ENCFF586MZN.bed	K562_RPS10_eCLIP_rep1.bed	ENCFF565KZA.bigWig	K562_HLTF_eCLIP_rep2_plus.bigWig
ENCFF338MGY.bed	K562_RPS10_eCLIP_rep2.bed	ENCFF351MIX.bigWig	K562_HLTF_eCLIP_rep1_plus.bigWig
ENCFF091OYS.bed	K562_AKAP8L_eCLIP_rep1.bed	ENCFF016LWQ.bigWig	K562_FXR2_eCLIP_rep1_minus.bigWig
ENCFF071DWM.bed	K562_AKAP8L_eCLIP_rep2.bed	ENCFF486RBU.bigWig	K562_FXR2_eCLIP_rep2_minus.bigWig
ENCFF357UDV.bed	K562_UCHL5_eCLIP_rep1.bed	ENCFF081NPT.bigWig	K562_FXR2_eCLIP_rep2_plus.bigWig
ENCFF660XGG.bed	K562_UCHL5_eCLIP_rep2.bed	ENCFF638BKP.bigWig	K562_FXR2_eCLIP_rep1_plus.bigWig
ENCFF920LSC.bed	K562_EIF4G2_eCLIP_rep2.bed	ENCFF605SJT.bigWig	K562_PPIL4_eCLIP_rep1_minus.bigWig
ENCFF977COP.bed	K562_EIF4G2_eCLIP_rep1.bed	ENCFF366XQT.bigWig	K562_PPIL4_eCLIP_rep2_minus.bigWig
ENCFF421XUC.bed	K562_ZC3H11A_eCLIP_rep2.bed	ENCFF179UGN.bigWig	K562_PPIL4_eCLIP_rep2_plus.bigWig
ENCFF288IBH.bed	K562_ZC3H11A_eCLIP_rep1.bed	ENCFF277LUS.bigWig	K562_PPIL4_eCLIP_rep1_plus.bigWig
ENCFF724XML.bed	K562_SF3B1_eCLIP_rep1.bed	ENCFF376NMQ.bigWig	K562_RPS11_eCLIP_rep2_minus.bigWig
ENCFF421JRL.bed	K562_SF3B1_eCLIP_rep2.bed	ENCFF750TDL.bigWig	K562_RPS11_eCLIP_rep1_minus.bigWig
ENCFF988HSD.bed	K562_IGF2BP2_eCLIP_rep2.bed	ENCFF676SJK.bigWig	K562_RPS11_eCLIP_rep1_plus.bigWig
ENCFF082VUD.bed	K562_IGF2BP2_eCLIP_rep1.bed	ENCFF142OTS.bigWig	K562_RPS11_eCLIP_rep2_plus.bigWig
ENCFF369RBP.bed	K562_EIF3G_eCLIP_rep1.bed	ENCFF343YDJ.bigWig	K562_ZC3H8_eCLIP_rep1_minus.bigWig
ENCFF388GZP.bed	K562_EIF3G_eCLIP_rep2.bed	ENCFF607HRG.bigWig	K562_ZC3H8_eCLIP_rep2_minus.bigWig
ENCFF010IOJ.bed	K562_AKAP1_eCLIP_rep2.bed	ENCFF711ATW.bigWig	K562_ZC3H8_eCLIP_rep2_plus.bigWig
ENCFF443ABK.bed	K562_AKAP1_eCLIP_rep1.bed	ENCFF627NRS.bigWig	K562_ZC3H8_eCLIP_rep1_plus.bigWig
ENCFF766DUS.bed	K562_PCBP1_eCLIP_rep1.bed	ENCFF321VGW.bigWig	K562_SUPV3L1_eCLIP_rep1_minus.bigWig
ENCFF121XCN.bed	K562_PCBP1_eCLIP_rep2.bed	ENCFF526SPD.bigWig	K562_SUPV3L1_eCLIP_rep2_minus.bigWig
ENCFF250PFH.bed	K562_GRWD1_eCLIP_rep1.bed	ENCFF160AGW.bigWig	K562_SUPV3L1_eCLIP_rep1_plus.bigWig
ENCFF282VMI.bed	K562_GRWD1_eCLIP_rep2.bed	ENCFF971TGH.bigWig	K562_SUPV3L1_eCLIP_rep2_plus.bigWig
ENCFF110QAU.bed	K562_WDR3_eCLIP_rep2.bed	ENCFF463JRJ.bigWig	K562_WDR43_eCLIP_rep1_minus.bigWig
ENCFF093FTO.bed	K562_WDR3_eCLIP_rep1.bed	ENCFF998NDS.bigWig	K562_WDR43_eCLIP_rep2_minus.bigWig
ENCFF486BAF.bed	K562_MBNL1_eCLIP_rep2.bed	ENCFF810LWT.bigWig	K562_WDR43_eCLIP_rep2_plus.bigWig
ENCFF099ZBH.bed	K562_MBNL1_eCLIP_rep1.bed	ENCFF729AVB.bigWig	K562_WDR43_eCLIP_rep1_plus.bigWig
ENCFF300YSV.bed	K562_ABCF1_eCLIP_rep1.bed	ENCFF687IPT.bigWig	K562_TBRG4_eCLIP_rep1_minus.bigWig
ENCFF489WZV.bed	K562_ABCF1_eCLIP_rep2.bed	ENCFF003ZMM.bigWig	K562_TBRG4_eCLIP_rep2_minus.bigWig
ENCFF559XNJ.bed	K562_PABPC4_eCLIP_rep2.bed	ENCFF165REA.bigWig	K562_TBRG4_eCLIP_rep2_plus.bigWig
ENCFF787HQF.bed	K562_PABPC4_eCLIP_rep1.bed	ENCFF412KGD.bigWig	K562_TBRG4_eCLIP_rep1_plus.bigWig
ENCFF853FGC.bed	K562_IGF2BP1_eCLIP_rep1.bed	ENCFF323ABS.bigWig	K562_XRN2_eCLIP_rep1_minus.bigWig
ENCFF185IDD.bed	K562_IGF2BP1_eCLIP_rep2.bed	ENCFF729JHG.bigWig	K562_XRN2_eCLIP_rep2_minus.bigWig
ENCFF679HYT.bed	K562_HNRNPK_eCLIP_rep1.bed	ENCFF236VEU.bigWig	K562_XRN2_eCLIP_rep2_plus.bigWig
ENCFF969JDI.bed	K562_HNRNPK_eCLIP_rep2.bed	ENCFF305SDT.bigWig	K562_XRN2_eCLIP_rep1_plus.bigWig
ENCFF034NKK.bed	K562_APOBEC3C_eCLIP_rep2.bed	ENCFF280TBX.bigWig	K562_RBM22_eCLIP_rep1_minus.bigWig
ENCFF273IBF.bed	K562_APOBEC3C_eCLIP_rep1.bed	ENCFF462WNO.bigWig	K562_RBM22_eCLIP_rep2_minus.bigWig
ENCFF342RHD.bed	K562_SSB_eCLIP_rep2.bed	ENCFF175VFW.bigWig	K562_RBM22_eCLIP_rep2_plus.bigWig
ENCFF203AWR.bed	K562_SSB_eCLIP_rep1.bed	ENCFF013KNT.bigWig	K562_RBM22_eCLIP_rep1_plus.bigWig
ENCFF484NSW.bed	K562_UTP3_eCLIP_rep1.bed	ENCFF577IRX.bigWig	K562_MTPAP_eCLIP_rep2_minus.bigWig
ENCFF106YFV.bed	K562_UTP3_eCLIP_rep2.bed	ENCFF779VXW.bigWig	K562_MTPAP_eCLIP_rep1_minus.bigWig
ENCFF856NLY.bed	K562_ELAVL1_eCLIP_rep2.bed	ENCFF333UPO.bigWig	K562_MTPAP_eCLIP_rep1_plus.bigWig
ENCFF742QQK.bed	K562_ELAVL1_eCLIP_rep1.bed	ENCFF106NME.bigWig	K562_MTPAP_eCLIP_rep2_plus.bigWig
ENCFF371VBO.bed	K562_GARS_eCLIP_rep2.bed	ENCFF792GUZ.bigWig	K562_DDX24_eCLIP_rep2_minus.bigWig
ENCFF223VLH.bed	K562_GARS_eCLIP_rep1.bed	ENCFF279IBQ.bigWig	K562_DDX24_eCLIP_rep1_minus.bigWig
ENCFF381KTD.bed	K562_TARDBP_eCLIP_rep1.bed	ENCFF357VDQ.bigWig	K562_DDX24_eCLIP_rep2_plus.bigWig
ENCFF265XPM.bed	K562_TARDBP_eCLIP_rep2.bed	ENCFF753RBY.bigWig	K562_DDX24_eCLIP_rep1_plus.bigWig
ENCFF051IAD.bed	K562_FXR2_eCLIP_rep1.bed	ENCFF396EFU.bigWig	K562_EFTUD2_eCLIP_rep2_minus.bigWig
ENCFF210KBV.bed	K562_FXR2_eCLIP_rep2.bed	ENCFF993ASY.bigWig	K562_EFTUD2_eCLIP_rep1_minus.bigWig
ENCFF338ZYM.bed	K562_RPS6_eCLIP_rep1.bed	ENCFF987LSY.bigWig	K562_EFTUD2_eCLIP_rep1_plus.bigWig
ENCFF015KGC.bed	K562_RPS6_eCLIP_rep2.bed	ENCFF151XSN.bigWig	K562_EFTUD2_eCLIP_rep2_plus.bigWig
ENCFF815YXB.bed	K562_APEX1_eCLIP_rep1.bed	ENCFF791QDL.bigWig	K562_GEMIN5_eCLIP_rep2_minus.bigWig
ENCFF143NZE.bed	K562_APEX1_eCLIP_rep2.bed	ENCFF141DSU.bigWig	K562_GEMIN5_eCLIP_rep1_minus.bigWig
ENCFF664RLU.bed	K562_HNRNPC_eCLIP_rep1.bed	ENCFF992XQV.bigWig	K562_GEMIN5_eCLIP_rep2_plus.bigWig
ENCFF526OQL.bed	K562_HNRNPC_eCLIP_rep2.bed	ENCFF287BQY.bigWig	K562_GEMIN5_eCLIP_rep1_plus.bigWig
ENCFF370BLG.bed	K562_CPEB4_eCLIP_rep2.bed	ENCFF896OMJ.bigWig	K562_RPS3_eCLIP_rep1_minus.bigWig
ENCFF976VFC.bed	K562_CPEB4_eCLIP_rep1.bed	ENCFF658GQD.bigWig	K562_RPS3_eCLIP_rep2_minus.bigWig
ENCFF066LUR.bed	K562_FMR1_eCLIP_rep1.bed	ENCFF875KNZ.bigWig	K562_RPS3_eCLIP_rep2_plus.bigWig
ENCFF033DLE.bed	K562_FMR1_eCLIP_rep2.bed	ENCFF186FBQ.bigWig	K562_RPS3_eCLIP_rep1_plus.bigWig
ENCFF766SEA.bed	K562_DDX47_eCLIP_rep2.bed	ENCFF068NME.bigWig	K562_HNRNPUL1_eCLIP_rep2_minus.bigWig
ENCFF228BKM.bed	K562_DDX47_eCLIP_rep1.bed	ENCFF530RHM.bigWig	K562_HNRNPUL1_eCLIP_rep1_minus.bigWig
ENCFF362XUO.bed	K562_U2AF1_eCLIP_rep1.bed	ENCFF901WPA.bigWig	K562_HNRNPUL1_eCLIP_rep2_plus.bigWig
ENCFF483ODR.bed	K562_U2AF1_eCLIP_rep2.bed	ENCFF850KEG.bigWig	K562_HNRNPUL1_eCLIP_rep1_plus.bigWig
ENCFF177GMP.bed	K562_NPM1_eCLIP_rep2.bed	ENCFF242QQJ.bigWig	K562_TARDBP_eCLIP_rep1_minus.bigWig
ENCFF669BCV.bed	K562_NPM1_eCLIP_rep1.bed	ENCFF979RKC.bigWig	K562_TARDBP_eCLIP_rep2_minus.bigWig
ENCFF824IDO.bed	K562_HNRNPK_eCLIP_rep2.bed	ENCFF569LQN.bigWig	K562_TARDBP_eCLIP_rep1_plus.bigWig
ENCFF241AOZ.bed	K562_HNRNPK_eCLIP_rep1.bed	ENCFF435YMY.bigWig	K562_TARDBP_eCLIP_rep2_plus.bigWig
ENCFF190XSX.bed	K562_QKI_eCLIP_rep1.bed	ENCFF094MHA.bigWig	K562_YWHAG_eCLIP_rep1_minus.bigWig
ENCFF767WUU.bed	K562_QKI_eCLIP_rep2.bed	ENCFF121YJC.bigWig	K562_YWHAG_eCLIP_rep2_minus.bigWig
ENCFF005PKK.bed	K562_HNRNPM_eCLIP_rep2.bed	ENCFF494UNP.bigWig	K562_YWHAG_eCLIP_rep1_plus.bigWig
ENCFF327FBF.bed	K562_HNRNPM_eCLIP_rep1.bed	ENCFF708WRS.bigWig	K562_YWHAG_eCLIP_rep2_plus.bigWig
ENCFF026UJY.bed	K562_UTP18_eCLIP_rep2.bed	ENCFF076BAY.bigWig	K562_LARP7_eCLIP_rep2_minus.bigWig
ENCFF353ULN.bed	K562_UTP18_eCLIP_rep1.bed	ENCFF476QFX.bigWig	K562_LARP7_eCLIP_rep1_minus.bigWig
ENCFF141SVY.bed	K562_PUM2_eCLIP_rep2.bed	ENCFF120VKU.bigWig	K562_LARP7_eCLIP_rep1_plus.bigWig
ENCFF372VPV.bed	K562_PUM2_eCLIP_rep1.bed	ENCFF323MGS.bigWig	K562_LARP7_eCLIP_rep2_plus.bigWig
ENCFF210TQC.bed	K562_YBX3_eCLIP_rep1.bed	ENCFF701SGQ.bigWig	K562_HNRNPU_eCLIP_rep1_minus.bigWig
ENCFF644FFX.bed	K562_YBX3_eCLIP_rep2.bed	ENCFF824KTJ.bigWig	K562_HNRNPU_eCLIP_rep2_minus.bigWig
ENCFF498SRM.bed	K562_SF3B4_eCLIP_rep2.bed	ENCFF235IOB.bigWig	K562_HNRNPU_eCLIP_rep1_plus.bigWig
ENCFF788PZS.bed	K562_SF3B4_eCLIP_rep1.bed	ENCFF274WHB.bigWig	K562_HNRNPU_eCLIP_rep2_plus.bigWig
ENCFF331KTS.bed	K562_GNL3_eCLIP_rep2.bed	ENCFF106ZUH.bigWig	K562_CSTF2T_eCLIP_rep2_minus.bigWig
ENCFF570HZI.bed	K562_GNL3_eCLIP_rep1.bed	ENCFF477YRW.bigWig	K562_CSTF2T_eCLIP_rep1_minus.bigWig
ENCFF264ODZ.bed	K562_DGCR8_eCLIP_rep1.bed	ENCFF449NFO.bigWig	K562_CSTF2T_eCLIP_rep1_plus.bigWig
ENCFF141IID.bed	K562_DGCR8_eCLIP_rep2.bed	ENCFF084JPG.bigWig	K562_CSTF2T_eCLIP_rep2_plus.bigWig
ENCFF032HMG.bed	K562_FXR1_eCLIP_rep1.bed	ENCFF928HDW.bigWig	K562_FMR1_eCLIP_rep2_minus.bigWig
ENCFF587FOC.bed	K562_FXR1_eCLIP_rep2.bed	ENCFF454HHT.bigWig	K562_FMR1_eCLIP_rep1_minus.bigWig
ENCFF332VUJ.bed	K562_EIF4E_eCLIP_rep2.bed	ENCFF997CVI.bigWig	K562_FMR1_eCLIP_rep1_plus.bigWig
ENCFF412VGD.bed	K562_EIF4E_eCLIP_rep1.bed	ENCFF441ZDI.bigWig	K562_FMR1_eCLIP_rep2_plus.bigWig
ENCFF296AYE.bed	K562_EEF2_eCLIP_rep2.bed	ENCFF582YLB.bigWig	K562_PRPF8_eCLIP_rep2_minus.bigWig
ENCFF431NBT.bed	K562_EEF2_eCLIP_rep1.bed	ENCFF984QHA.bigWig	K562_PRPF8_eCLIP_rep1_minus.bigWig
ENCFF613UUR.bed	K562_SRSF9_eCLIP_rep2.bed	ENCFF160MVU.bigWig	K562_PRPF8_eCLIP_rep2_plus.bigWig
ENCFF860QZG.bed	K562_SRSF9_eCLIP_rep1.bed	ENCFF494DYW.bigWig	K562_PRPF8_eCLIP_rep1_plus.bigWig
ENCFF389JHH.bed	K562_PUS1_eCLIP_rep1.bed	ENCFF087IME.bigWig	K562_ZNF622_eCLIP_rep1_minus.bigWig
ENCFF904FWY.bed	K562_PUS1_eCLIP_rep2.bed	ENCFF177VMJ.bigWig	K562_ZNF622_eCLIP_rep2_minus.bigWig
ENCFF262QZT.bed	K562_NCBP2_eCLIP_rep1.bed	ENCFF869NWQ.bigWig	K562_ZNF622_eCLIP_rep2_plus.bigWig
ENCFF683ATR.bed	K562_NCBP2_eCLIP_rep2.bed	ENCFF167ADU.bigWig	K562_ZNF622_eCLIP_rep1_plus.bigWig
ENCFF318RDQ.bed	K562_GPKOW_eCLIP_rep2.bed	ENCFF485TSN.bigWig	K562_DDX21_eCLIP_rep2_minus.bigWig
ENCFF040AJT.bed	K562_GPKOW_eCLIP_rep1.bed	ENCFF006QTI.bigWig	K562_DDX21_eCLIP_rep1_minus.bigWig
ENCFF507ZJR.bed	K562_FTO_eCLIP_rep1.bed	ENCFF402AXI.bigWig	K562_DDX21_eCLIP_rep1_plus.bigWig
ENCFF018SYJ.bed	K562_FTO_eCLIP_rep2.bed	ENCFF139OJJ.bigWig	K562_DDX21_eCLIP_rep2_plus.bigWig
ENCFF758RAD.bed	K562_EWSR1_eCLIP_rep2.bed	ENCFF958SCV.bigWig	K562_ZRANB2_eCLIP_rep1_minus.bigWig
ENCFF998MNV.bed	K562_EWSR1_eCLIP_rep1.bed	ENCFF265MNS.bigWig	K562_ZRANB2_eCLIP_rep2_minus.bigWig
ENCFF267DFP.bed	K562_FASTKD2_eCLIP_rep1.bed	ENCFF704VCA.bigWig	K562_ZRANB2_eCLIP_rep1_plus.bigWig
ENCFF718VRE.bed	K562_FASTKD2_eCLIP_rep2.bed	ENCFF274LYE.bigWig	K562_ZRANB2_eCLIP_rep2_plus.bigWig
ENCFF986MGC.bed	K562_LARP4_eCLIP_rep2.bed	ENCFF170VKG.bigWig	K562_FAM120A_eCLIP_rep1_minus.bigWig
ENCFF259HTD.bed	K562_LARP4_eCLIP_rep1.bed	ENCFF353KNB.bigWig	K562_FAM120A_eCLIP_rep2_minus.bigWig
ENCFF400LMM.bed	K562_LIN28B_eCLIP_rep1.bed	ENCFF379MQJ.bigWig	K562_FAM120A_eCLIP_rep1_plus.bigWig
ENCFF892DVI.bed	K562_LIN28B_eCLIP_rep2.bed	ENCFF086NQQ.bigWig	K562_FAM120A_eCLIP_rep2_plus.bigWig
ENCFF401YRZ.bed	K562_HNRNPL_eCLIP_rep1.bed	ENCFF393NCT.bigWig	K562_KHSRP_eCLIP_rep1_minus.bigWig
ENCFF077OSY.bed	K562_HNRNPL_eCLIP_rep2.bed	ENCFF060SFT.bigWig	K562_KHSRP_eCLIP_rep2_minus.bigWig
ENCFF913GBH.bed	K562_GTF2F1_eCLIP_rep1.bed	ENCFF034PXB.bigWig	K562_KHSRP_eCLIP_rep2_plus.bigWig
ENCFF710NXQ.bed	K562_GTF2F1_eCLIP_rep2.bed	ENCFF860VTI.bigWig	K562_KHSRP_eCLIP_rep1_plus.bigWig
ENCFF162KHT.bed	K562_DHX30_eCLIP_rep2.bed	ENCFF017FYD.bigWig	K562_DDX3X_eCLIP_rep1_minus.bigWig
ENCFF803KPC.bed	K562_DHX30_eCLIP_rep1.bed	ENCFF818BXB.bigWig	K562_DDX3X_eCLIP_rep2_minus.bigWig
ENCFF713MUH.bed	K562_ELAC2_eCLIP_rep1.bed	ENCFF294VBN.bigWig	K562_DDX3X_eCLIP_rep1_plus.bigWig
ENCFF526ZZK.bed	K562_ELAC2_eCLIP_rep2.bed	ENCFF432AKR.bigWig	K562_DDX3X_eCLIP_rep2_plus.bigWig
ENCFF053PAM.bed	K562_EXOSC10_eCLIP_rep1.bed	ENCFF559UDZ.bigWig	K562_NOLC1_eCLIP_rep1_minus.bigWig
ENCFF448LBY.bed	K562_EXOSC10_eCLIP_rep2.bed	ENCFF229LUI.bigWig	K562_NOLC1_eCLIP_rep2_minus.bigWig
ENCFF075MZV.bed	K562_METTL1_eCLIP_rep1.bed	ENCFF480NPA.bigWig	K562_NOLC1_eCLIP_rep2_plus.bigWig
ENCFF618DYL.bed	K562_METTL1_eCLIP_rep2.bed	ENCFF477USX.bigWig	K562_NOLC1_eCLIP_rep1_plus.bigWig
ENCFF127WRQ.bed	K562_EXOSC5_eCLIP_rep1.bed	ENCFF045PAR.bigWig	K562_RPS10_eCLIP_rep2_plus.bigWig
ENCFF532CWB.bed	K562_EXOSC5_eCLIP_rep2.bed	ENCFF252EEK.bigWig	K562_RPS10_eCLIP_rep1_minus.bigWig
ENCFF518MSP.bed	K562_UPF1_eCLIP_rep1.bed	ENCFF780EXS.bigWig	K562_RPS10_eCLIP_rep1_plus.bigWig
ENCFF707BGL.bed	K562_UPF1_eCLIP_rep2.bed	ENCFF460AVS.bigWig	K562_RPS10_eCLIP_rep2_minus.bigWig
ENCFF112HAC.bed	K562_MORC2_eCLIP_rep1.bed	ENCFF259BMC.bigWig	K562_AKAP8L_eCLIP_rep1_minus.bigWig
ENCFF899XIV.bed	K562_MORC2_eCLIP_rep2.bed	ENCFF778ETC.bigWig	K562_AKAP8L_eCLIP_rep2_minus.bigWig
ENCFF535FFL.bed	K562_DDX1_eCLIP_rep1.bed	ENCFF580SQQ.bigWig	K562_AKAP8L_eCLIP_rep1_plus.bigWig
ENCFF494PHH.bed	K562_DDX1_eCLIP_rep2.bed	ENCFF143UZI.bigWig	K562_AKAP8L_eCLIP_rep2_plus.bigWig
ENCFF402AIE.bed	K562_TRA2A_eCLIP_rep1.bed	ENCFF016BUJ.bigWig	K562_UCHL5_eCLIP_rep1_minus.bigWig
ENCFF618ZPP.bed	K562_TRA2A_eCLIP_rep2.bed	ENCFF618PQG.bigWig	K562_UCHL5_eCLIP_rep2_minus.bigWig
ENCFF760VJY.bed	K562_LSM11_eCLIP_rep2.bed	ENCFF681XDL.bigWig	K562_UCHL5_eCLIP_rep2_plus.bigWig
ENCFF733BEV.bed	K562_LSM11_eCLIP_rep1.bed	ENCFF216ICY.bigWig	K562_UCHL5_eCLIP_rep1_plus.bigWig
ENCFF487OCT.bed	K562_SRSF1_eCLIP_rep1.bed	ENCFF285CJS.bigWig	K562_EIF4G2_eCLIP_rep2_minus.bigWig
ENCFF969OHE.bed	K562_SRSF1_eCLIP_rep2.bed	ENCFF414TML.bigWig	K562_EIF4G2_eCLIP_rep1_minus.bigWig
ENCFF032BJT.bed	K562_DDX43_eCLIP_rep2.bed	ENCFF305TMB.bigWig	K562_EIF4G2_eCLIP_rep1_plus.bigWig
ENCFF456RNY.bed	K562_DDX43_eCLIP_rep1.bed	ENCFF932YYV.bigWig	K562_EIF4G2_eCLIP_rep2_plus.bigWig
ENCFF269GWR.bed	K562_RNF187_eCLIP_rep2.bed	ENCFF849BHF.bigWig	K562_ZC3H11A_eCLIP_rep2_minus.bigWig
ENCFF834BUB.bed	K562_RNF187_eCLIP_rep1.bed	ENCFF716ISC.bigWig	K562_ZC3H11A_eCLIP_rep1_minus.bigWig
ENCFF674TKN.bed	K562_TIA1_eCLIP_rep1.bed	ENCFF773UBK.bigWig	K562_ZC3H11A_eCLIP_rep1_plus.bigWig
ENCFF348TPU.bed	K562_TIA1_eCLIP_rep2.bed	ENCFF183AXJ.bigWig	K562_ZC3H11A_eCLIP_rep2_plus.bigWig
ENCFF293KBS.bed	K562_XRCC6_eCLIP_rep1.bed	ENCFF835USP.bigWig	K562_SF3B1_eCLIP_rep1_minus.bigWig
ENCFF297MTE.bed	K562_XRCC6_eCLIP_rep2.bed	ENCFF122SLD.bigWig	K562_SF3B1_eCLIP_rep2_minus.bigWig
ENCFF683EWG.bed	K562_SLBP_eCLIP_rep1.bed	ENCFF197LZZ.bigWig	K562_SF3B1_eCLIP_rep2_plus.bigWig
ENCFF127WAK.bed	K562_SLBP_eCLIP_rep2.bed	ENCFF928WSR.bigWig	K562_SF3B1_eCLIP_rep1_plus.bigWig
ENCFF125YXW.bed	K562_SLTM_eCLIP_rep2.bed	ENCFF434VQE.bigWig	K562_IGF2BP2_eCLIP_rep1_minus.bigWig
ENCFF485BRZ.bed	K562_SLTM_eCLIP_rep1.bed	ENCFF808IWD.bigWig	K562_IGF2BP2_eCLIP_rep2_minus.bigWig
ENCFF981ZPT.bed	K562_DDX42_eCLIP_rep2.bed	ENCFF264QIH.bigWig	K562_IGF2BP2_eCLIP_rep2_plus.bigWig
ENCFF028IXB.bed	K562_DDX42_eCLIP_rep1.bed	ENCFF631HDI.bigWig	K562_IGF2BP2_eCLIP_rep1_plus.bigWig
ENCFF341KSL.bed	K562_SND1_eCLIP_rep1.bed	ENCFF732EGK.bigWig	K562_EIF3G_eCLIP_rep1_minus.bigWig
ENCFF971LCF.bed	K562_SND1_eCLIP_rep2.bed	ENCFF897PMP.bigWig	K562_EIF3G_eCLIP_rep2_minus.bigWig
ENCFF728JKU.bed	K562_SRSF7_eCLIP_rep1.bed	ENCFF813DFW.bigWig	K562_EIF3G_eCLIP_rep2_plus.bigWig
ENCFF986KGV.bed	K562_SRSF7_eCLIP_rep2.bed	ENCFF692DXH.bigWig	K562_EIF3G_eCLIP_rep1_plus.bigWig
ENCFF623LPT.bed	K562_ILF3_eCLIP_rep1.bed	ENCFF820DWM.bigWig	K562_AKAP1_eCLIP_rep2_minus.bigWig
ENCFF353RQP.bed	K562_ILF3_eCLIP_rep2.bed	ENCFF625XVL.bigWig	K562_AKAP1_eCLIP_rep1_minus.bigWig
ENCFF779OIO.bed	K562_RBFOX2_eCLIP_rep2.bed	ENCFF294XKC.bigWig	K562_AKAP1_eCLIP_rep1_plus.bigWig
ENCFF910WLP.bed	K562_RBFOX2_eCLIP_rep1.bed	ENCFF719MCG.bigWig	K562_AKAP1_eCLIP_rep2_plus.bigWig
ENCFF883DWR.bed	K562_AARS_eCLIP_rep1.bed	ENCFF734ILS.bigWig	K562_PCBP1_eCLIP_rep1_minus.bigWig
ENCFF684FVK.bed	K562_AARS_eCLIP_rep2.bed	ENCFF202IKH.bigWig	K562_PCBP1_eCLIP_rep2_minus.bigWig
ENCFF996BXS.bed	K562_TAF15_eCLIP_rep1.bed	ENCFF363NBL.bigWig	K562_PCBP1_eCLIP_rep1_plus.bigWig
ENCFF409DPS.bed	K562_TAF15_eCLIP_rep2.bed	ENCFF868AMF.bigWig	K562_PCBP1_eCLIP_rep2_plus.bigWig
ENCFF851PEL.bed	K562_RYBP_eCLIP_rep2.bed	ENCFF479IAR.bigWig	K562_GRWD1_eCLIP_rep2_minus.bigWig
ENCFF905GCD.bed	K562_RYBP_eCLIP_rep1.bed	ENCFF051YGO.bigWig	K562_GRWD1_eCLIP_rep1_minus.bigWig
ENCFF050SYC.bed	K562_ADAT1_eCLIP_rep1.bed	ENCFF499RMW.bigWig	K562_GRWD1_eCLIP_rep1_plus.bigWig
ENCFF770BZW.bed	K562_ADAT1_eCLIP_rep2.bed	ENCFF128BVH.bigWig	K562_GRWD1_eCLIP_rep2_plus.bigWig
		ENCFF507SLL.bigWig	K562_WDR3_eCLIP_rep1_minus.bigWig
		ENCFF474ULB.bigWig	K562_WDR3_eCLIP_rep2_minus.bigWig
		ENCFF636LWR.bigWig	K562_WDR3_eCLIP_rep1_plus.bigWig
		ENCFF426QHQ.bigWig	K562_WDR3_eCLIP_rep2_plus.bigWig
		ENCFF536EQM.bigWig	K562_MBNL1_eCLIP_rep1_plus.bigWig
		ENCFF441KZY.bigWig	K562_MBNL1_eCLIP_rep1_minus.bigWig
		ENCFF917NLI.bigWig	K562_MBNL1_eCLIP_rep2_minus.bigWig
		ENCFF424GEO.bigWig	K562_MBNL1_eCLIP_rep2_plus.bigWig
		ENCFF414SIN.bigWig	K562_ABCF1_eCLIP_rep1_minus.bigWig
		ENCFF470BUE.bigWig	K562_ABCF1_eCLIP_rep2_minus.bigWig
		ENCFF070VGS.bigWig	K562_ABCF1_eCLIP_rep1_plus.bigWig
		ENCFF090YWS.bigWig	K562_ABCF1_eCLIP_rep2_plus.bigWig
		ENCFF990TDV.bigWig	K562_PABPC4_eCLIP_rep1_minus.bigWig
		ENCFF745TLR.bigWig	K562_PABPC4_eCLIP_rep2_minus.bigWig
		ENCFF652YFU.bigWig	K562_PABPC4_eCLIP_rep1_plus.bigWig
		ENCFF446CWO.bigWig	K562_PABPC4_eCLIP_rep2_plus.bigWig
		ENCFF142XLV.bigWig	K562_IGF2BP1_eCLIP_rep2_minus.bigWig
		ENCFF540OLV.bigWig	K562_IGF2BP1_eCLIP_rep1_minus.bigWig
		ENCFF810AIK.bigWig	K562_IGF2BP1_eCLIP_rep1_plus.bigWig
		ENCFF733OIX.bigWig	K562_IGF2BP1_eCLIP_rep2_plus.bigWig
		ENCFF559GBT.bigWig	K562_HNRNPK_eCLIP_rep1_minus.bigWig
		ENCFF988TCR.bigWig	K562_HNRNPK_eCLIP_rep1_plus.bigWig
		ENCFF961MIZ.bigWig	K562_HNRNPK_eCLIP_rep2_minus.bigWig
		ENCFF102VWD.bigWig	K562_HNRNPK_eCLIP_rep2_plus.bigWig
		ENCFF571IFM.bigWig	K562_APOBEC3C_eCLIP_rep1_minus.bigWig
		ENCFF921RKR.bigWig	K562_APOBEC3C_eCLIP_rep2_minus.bigWig
		ENCFF430LRB.bigWig	K562_APOBEC3C_eCLIP_rep1_plus.bigWig
		ENCFF779MXW.bigWig	K562_APOBEC3C_eCLIP_rep2_plus.bigWig
		ENCFF623ASO.bigWig	K562_SSB_eCLIP_rep2_minus.bigWig
		ENCFF732TUI.bigWig	K562_SSB_eCLIP_rep1_minus.bigWig
		ENCFF464BIY.bigWig	K562_SSB_eCLIP_rep1_plus.bigWig
		ENCFF118XXW.bigWig	K562_SSB_eCLIP_rep2_plus.bigWig
		ENCFF247UQF.bigWig	K562_UTP3_eCLIP_rep1_minus.bigWig
		ENCFF584CAL.bigWig	K562_UTP3_eCLIP_rep2_minus.bigWig
		ENCFF115DFJ.bigWig	K562_UTP3_eCLIP_rep1_plus.bigWig
		ENCFF363DGG.bigWig	K562_UTP3_eCLIP_rep2_plus.bigWig
		ENCFF985QYQ.bigWig	K562_ELAVL1_eCLIP_rep2_minus.bigWig
		ENCFF667MNK.bigWig	K562_ELAVL1_eCLIP_rep2_plus.bigWig
		ENCFF631NUT.bigWig	K562_ELAVL1_eCLIP_rep1_minus.bigWig
		ENCFF642YDN.bigWig	K562_ELAVL1_eCLIP_rep1_plus.bigWig
		ENCFF358EEW.bigWig	K562_GARS_eCLIP_rep1_plus.bigWig
		ENCFF039LSL.bigWig	K562_GARS_eCLIP_rep2_plus.bigWig
		ENCFF293RPW.bigWig	K562_GARS_eCLIP_rep1_minus.bigWig
		ENCFF945JTL.bigWig	K562_GARS_eCLIP_rep2_minus.bigWig
		ENCFF848FSN.bigWig	K562_TARDBP_eCLIP_rep1_plus.bigWig
		ENCFF518YAZ.bigWig	K562_TARDBP_eCLIP_rep2_minus.bigWig
		ENCFF003HLV.bigWig	K562_TARDBP_eCLIP_rep1_minus.bigWig
		ENCFF214TBL.bigWig	K562_TARDBP_eCLIP_rep2_plus.bigWig
		ENCFF379JFL.bigWig	K562_FXR2_eCLIP_rep1_plus.bigWig
		ENCFF840LRC.bigWig	K562_FXR2_eCLIP_rep2_minus.bigWig
		ENCFF209HNC.bigWig	K562_FXR2_eCLIP_rep1_minus.bigWig
		ENCFF730SFB.bigWig	K562_FXR2_eCLIP_rep2_plus.bigWig
		ENCFF457LIU.bigWig	K562_RPS6_eCLIP_rep1_plus.bigWig
		ENCFF929BBP.bigWig	K562_RPS6_eCLIP_rep2_minus.bigWig
		ENCFF505QFY.bigWig	K562_RPS6_eCLIP_rep2_plus.bigWig
		ENCFF013EJK.bigWig	K562_RPS6_eCLIP_rep1_minus.bigWig
		ENCFF785VGC.bigWig	K562_APEX1_eCLIP_rep1_plus.bigWig
		ENCFF808VYJ.bigWig	K562_APEX1_eCLIP_rep1_minus.bigWig
		ENCFF934PME.bigWig	K562_APEX1_eCLIP_rep2_plus.bigWig
		ENCFF842TZP.bigWig	K562_APEX1_eCLIP_rep2_minus.bigWig
		ENCFF865EZO.bigWig	K562_HNRNPC_eCLIP_rep1_minus.bigWig
		ENCFF749IQI.bigWig	K562_HNRNPC_eCLIP_rep2_minus.bigWig
		ENCFF896JOI.bigWig	K562_HNRNPC_eCLIP_rep1_plus.bigWig
		ENCFF214HGS.bigWig	K562_HNRNPC_eCLIP_rep2_plus.bigWig
		ENCFF508FXQ.bigWig	K562_CPEB4_eCLIP_rep1_minus.bigWig
		ENCFF718OFC.bigWig	K562_CPEB4_eCLIP_rep2_minus.bigWig
		ENCFF231USX.bigWig	K562_CPEB4_eCLIP_rep1_plus.bigWig
		ENCFF402FOP.bigWig	K562_CPEB4_eCLIP_rep2_plus.bigWig
		ENCFF201KFU.bigWig	K562_FMR1_eCLIP_rep1_plus.bigWig
		ENCFF271SFW.bigWig	K562_FMR1_eCLIP_rep2_minus.bigWig
		ENCFF906CLF.bigWig	K562_FMR1_eCLIP_rep2_plus.bigWig
		ENCFF524LLU.bigWig	K562_FMR1_eCLIP_rep1_minus.bigWig
		ENCFF270ZTY.bigWig	K562_DDX47_eCLIP_rep2_plus.bigWig
		ENCFF107VSH.bigWig	K562_DDX47_eCLIP_rep1_plus.bigWig
		ENCFF278RTY.bigWig	K562_DDX47_eCLIP_rep2_minus.bigWig
		ENCFF602MAB.bigWig	K562_DDX47_eCLIP_rep1_minus.bigWig
		ENCFF262KAI.bigWig	K562_U2AF1_eCLIP_rep1_minus.bigWig
		ENCFF362OME.bigWig	K562_U2AF1_eCLIP_rep2_minus.bigWig
		ENCFF939EXV.bigWig	K562_U2AF1_eCLIP_rep2_plus.bigWig
		ENCFF607AXF.bigWig	K562_U2AF1_eCLIP_rep1_plus.bigWig
		ENCFF656YTJ.bigWig	K562_NPM1_eCLIP_rep1_minus.bigWig
		ENCFF092RGX.bigWig	K562_NPM1_eCLIP_rep2_minus.bigWig
		ENCFF161ISV.bigWig	K562_NPM1_eCLIP_rep2_plus.bigWig
		ENCFF763CJW.bigWig	K562_NPM1_eCLIP_rep1_plus.bigWig
		ENCFF131UIL.bigWig	K562_HNRNPK_eCLIP_rep1_minus.bigWig
		ENCFF562ZXX.bigWig	K562_HNRNPK_eCLIP_rep2_minus.bigWig
		ENCFF071EBB.bigWig	K562_HNRNPK_eCLIP_rep1_plus.bigWig
		ENCFF378VYJ.bigWig	K562_HNRNPK_eCLIP_rep2_plus.bigWig
		ENCFF678IFH.bigWig	K562_QKI_eCLIP_rep1_minus.bigWig
		ENCFF735OFZ.bigWig	K562_QKI_eCLIP_rep2_minus.bigWig
		ENCFF815DJH.bigWig	K562_QKI_eCLIP_rep1_plus.bigWig
		ENCFF715YVP.bigWig	K562_QKI_eCLIP_rep2_plus.bigWig
		ENCFF100HQU.bigWig	K562_HNRNPM_eCLIP_rep1_minus.bigWig
		ENCFF868FLU.bigWig	K562_HNRNPM_eCLIP_rep2_minus.bigWig
		ENCFF243GOY.bigWig	K562_HNRNPM_eCLIP_rep2_plus.bigWig
		ENCFF895QHH.bigWig	K562_HNRNPM_eCLIP_rep1_plus.bigWig
		ENCFF694SHS.bigWig	K562_UTP18_eCLIP_rep1_minus.bigWig
		ENCFF148JQN.bigWig	K562_UTP18_eCLIP_rep2_minus.bigWig
		ENCFF003MPD.bigWig	K562_UTP18_eCLIP_rep1_plus.bigWig
		ENCFF252UGK.bigWig	K562_UTP18_eCLIP_rep2_plus.bigWig
		ENCFF452BKL.bigWig	K562_PUM2_eCLIP_rep1_minus.bigWig
		ENCFF657MOM.bigWig	K562_PUM2_eCLIP_rep2_minus.bigWig
		ENCFF769SCB.bigWig	K562_PUM2_eCLIP_rep1_plus.bigWig
		ENCFF133NMP.bigWig	K562_PUM2_eCLIP_rep2_plus.bigWig
		ENCFF047ZXN.bigWig	K562_YBX3_eCLIP_rep1_minus.bigWig
		ENCFF749RQN.bigWig	K562_YBX3_eCLIP_rep2_minus.bigWig
		ENCFF829JJE.bigWig	K562_YBX3_eCLIP_rep1_plus.bigWig
		ENCFF048UHG.bigWig	K562_YBX3_eCLIP_rep2_plus.bigWig
		ENCFF177LYJ.bigWig	K562_SF3B4_eCLIP_rep2_minus.bigWig
		ENCFF378VIS.bigWig	K562_SF3B4_eCLIP_rep1_minus.bigWig
		ENCFF716HYU.bigWig	K562_SF3B4_eCLIP_rep1_plus.bigWig
		ENCFF009QOP.bigWig	K562_SF3B4_eCLIP_rep2_plus.bigWig
		ENCFF917IBY.bigWig	K562_GNL3_eCLIP_rep1_minus.bigWig
		ENCFF196IVQ.bigWig	K562_GNL3_eCLIP_rep2_minus.bigWig
		ENCFF711GSR.bigWig	K562_GNL3_eCLIP_rep1_plus.bigWig
		ENCFF701JYH.bigWig	K562_GNL3_eCLIP_rep2_plus.bigWig
		ENCFF311HEG.bigWig	K562_DGCR8_eCLIP_rep1_minus.bigWig
		ENCFF402WTV.bigWig	K562_DGCR8_eCLIP_rep2_minus.bigWig
		ENCFF321LLR.bigWig	K562_DGCR8_eCLIP_rep1_plus.bigWig
		ENCFF555GID.bigWig	K562_DGCR8_eCLIP_rep2_plus.bigWig
		ENCFF366EQZ.bigWig	K562_FXR1_eCLIP_rep2_minus.bigWig
		ENCFF630LBY.bigWig	K562_FXR1_eCLIP_rep1_plus.bigWig
		ENCFF072SZB.bigWig	K562_FXR1_eCLIP_rep2_plus.bigWig
		ENCFF805WPQ.bigWig	K562_FXR1_eCLIP_rep1_minus.bigWig
		ENCFF530DZO.bigWig	K562_EIF4E_eCLIP_rep1_plus.bigWig
		ENCFF327QRW.bigWig	K562_EIF4E_eCLIP_rep1_minus.bigWig
		ENCFF952TZH.bigWig	K562_EIF4E_eCLIP_rep2_minus.bigWig
		ENCFF069GNZ.bigWig	K562_EIF4E_eCLIP_rep2_plus.bigWig
		ENCFF468VOP.bigWig	K562_EEF2_eCLIP_rep1_plus.bigWig
		ENCFF696HGR.bigWig	K562_EEF2_eCLIP_rep1_minus.bigWig
		ENCFF432QLO.bigWig	K562_EEF2_eCLIP_rep2_minus.bigWig
		ENCFF548NSD.bigWig	K562_EEF2_eCLIP_rep2_plus.bigWig
		ENCFF267JVL.bigWig	K562_SRSF9_eCLIP_rep2_minus.bigWig
		ENCFF817EMS.bigWig	K562_SRSF9_eCLIP_rep1_plus.bigWig
		ENCFF629AZC.bigWig	K562_SRSF9_eCLIP_rep2_plus.bigWig
		ENCFF054DXC.bigWig	K562_SRSF9_eCLIP_rep1_minus.bigWig
		ENCFF985YQV.bigWig	K562_PUS1_eCLIP_rep2_minus.bigWig
		ENCFF761HNN.bigWig	K562_PUS1_eCLIP_rep1_minus.bigWig
		ENCFF552FLR.bigWig	K562_PUS1_eCLIP_rep1_plus.bigWig
		ENCFF509ACI.bigWig	K562_PUS1_eCLIP_rep2_plus.bigWig
		ENCFF111TGW.bigWig	K562_NCBP2_eCLIP_rep1_minus.bigWig
		ENCFF746QXA.bigWig	K562_NCBP2_eCLIP_rep2_minus.bigWig
		ENCFF341TZE.bigWig	K562_NCBP2_eCLIP_rep1_plus.bigWig
		ENCFF446AIP.bigWig	K562_NCBP2_eCLIP_rep2_plus.bigWig
		ENCFF809WWV.bigWig	K562_GPKOW_eCLIP_rep1_minus.bigWig
		ENCFF173GMF.bigWig	K562_GPKOW_eCLIP_rep2_minus.bigWig
		ENCFF512KJQ.bigWig	K562_GPKOW_eCLIP_rep1_plus.bigWig
		ENCFF266IDC.bigWig	K562_GPKOW_eCLIP_rep2_plus.bigWig
		ENCFF016FLK.bigWig	K562_FTO_eCLIP_rep1_minus.bigWig
		ENCFF636JOT.bigWig	K562_FTO_eCLIP_rep2_minus.bigWig
		ENCFF527LQR.bigWig	K562_FTO_eCLIP_rep2_plus.bigWig
		ENCFF176CHW.bigWig	K562_FTO_eCLIP_rep1_plus.bigWig
		ENCFF503AVX.bigWig	K562_EWSR1_eCLIP_rep2_minus.bigWig
		ENCFF658QZE.bigWig	K562_EWSR1_eCLIP_rep1_minus.bigWig
		ENCFF286FNZ.bigWig	K562_EWSR1_eCLIP_rep1_plus.bigWig
		ENCFF130VUZ.bigWig	K562_EWSR1_eCLIP_rep2_plus.bigWig
		ENCFF965AJN.bigWig	K562_FASTKD2_eCLIP_rep2_minus.bigWig
		ENCFF232TCE.bigWig	K562_FASTKD2_eCLIP_rep1_minus.bigWig
		ENCFF042LBO.bigWig	K562_FASTKD2_eCLIP_rep1_plus.bigWig
		ENCFF505SKP.bigWig	K562_FASTKD2_eCLIP_rep2_plus.bigWig
		ENCFF902BBF.bigWig	K562_LARP4_eCLIP_rep1_minus.bigWig
		ENCFF730QLX.bigWig	K562_LARP4_eCLIP_rep2_minus.bigWig
		ENCFF554KDS.bigWig	K562_LARP4_eCLIP_rep1_plus.bigWig
		ENCFF982PZA.bigWig	K562_LARP4_eCLIP_rep2_plus.bigWig
		ENCFF394QPB.bigWig	K562_LIN28B_eCLIP_rep1_minus.bigWig
		ENCFF493GWT.bigWig	K562_LIN28B_eCLIP_rep2_minus.bigWig
		ENCFF430TNL.bigWig	K562_LIN28B_eCLIP_rep1_plus.bigWig
		ENCFF857JIT.bigWig	K562_LIN28B_eCLIP_rep2_plus.bigWig
		ENCFF142CTH.bigWig	K562_HNRNPL_eCLIP_rep2_minus.bigWig
		ENCFF317GJD.bigWig	K562_HNRNPL_eCLIP_rep1_minus.bigWig
		ENCFF305DWD.bigWig	K562_HNRNPL_eCLIP_rep1_plus.bigWig
		ENCFF376FVR.bigWig	K562_HNRNPL_eCLIP_rep2_plus.bigWig
		ENCFF699OHP.bigWig	K562_GTF2F1_eCLIP_rep2_minus.bigWig
		ENCFF189QNM.bigWig	K562_GTF2F1_eCLIP_rep1_minus.bigWig
		ENCFF784AYX.bigWig	K562_GTF2F1_eCLIP_rep1_plus.bigWig
		ENCFF624FSB.bigWig	K562_GTF2F1_eCLIP_rep2_plus.bigWig
		ENCFF697MVO.bigWig	K562_DHX30_eCLIP_rep1_minus.bigWig
		ENCFF050FPH.bigWig	K562_DHX30_eCLIP_rep2_minus.bigWig
		ENCFF513KIB.bigWig	K562_DHX30_eCLIP_rep1_plus.bigWig
		ENCFF262GIM.bigWig	K562_DHX30_eCLIP_rep2_plus.bigWig
		ENCFF313HFG.bigWig	K562_ELAC2_eCLIP_rep1_minus.bigWig
		ENCFF731IGL.bigWig	K562_ELAC2_eCLIP_rep2_plus.bigWig
		ENCFF397BRB.bigWig	K562_ELAC2_eCLIP_rep2_minus.bigWig
		ENCFF958IRA.bigWig	K562_ELAC2_eCLIP_rep1_plus.bigWig
		ENCFF332TUN.bigWig	K562_EXOSC10_eCLIP_rep2_minus.bigWig
		ENCFF541MVG.bigWig	K562_EXOSC10_eCLIP_rep1_minus.bigWig
		ENCFF501LBN.bigWig	K562_EXOSC10_eCLIP_rep1_plus.bigWig
		ENCFF852QAD.bigWig	K562_EXOSC10_eCLIP_rep2_plus.bigWig
		ENCFF046STR.bigWig	K562_METTL1_eCLIP_rep2_minus.bigWig
		ENCFF320TZU.bigWig	K562_METTL1_eCLIP_rep2_plus.bigWig
		ENCFF990ODU.bigWig	K562_METTL1_eCLIP_rep1_plus.bigWig
		ENCFF116STD.bigWig	K562_METTL1_eCLIP_rep1_minus.bigWig
		ENCFF942QUP.bigWig	K562_EXOSC5_eCLIP_rep2_minus.bigWig
		ENCFF623VXC.bigWig	K562_EXOSC5_eCLIP_rep1_minus.bigWig
		ENCFF624PJV.bigWig	K562_EXOSC5_eCLIP_rep2_plus.bigWig
		ENCFF741JYV.bigWig	K562_EXOSC5_eCLIP_rep1_plus.bigWig
		ENCFF964TKW.bigWig	K562_UPF1_eCLIP_rep1_minus.bigWig
		ENCFF433CWN.bigWig	K562_UPF1_eCLIP_rep2_minus.bigWig
		ENCFF696ORH.bigWig	K562_UPF1_eCLIP_rep1_plus.bigWig
		ENCFF684MFT.bigWig	K562_UPF1_eCLIP_rep2_plus.bigWig
		ENCFF449SZR.bigWig	K562_MORC2_eCLIP_rep2_plus.bigWig
		ENCFF765TNA.bigWig	K562_MORC2_eCLIP_rep1_plus.bigWig
		ENCFF363SQA.bigWig	K562_MORC2_eCLIP_rep1_minus.bigWig
		ENCFF474DAP.bigWig	K562_MORC2_eCLIP_rep2_minus.bigWig
		ENCFF037YQK.bigWig	K562_DDX1_eCLIP_rep1_minus.bigWig
		ENCFF790WYG.bigWig	K562_DDX1_eCLIP_rep2_minus.bigWig
		ENCFF788XWZ.bigWig	K562_DDX1_eCLIP_rep2_plus.bigWig
		ENCFF490IGM.bigWig	K562_DDX1_eCLIP_rep1_plus.bigWig
		ENCFF801MSL.bigWig	K562_TRA2A_eCLIP_rep1_minus.bigWig
		ENCFF901JTH.bigWig	K562_TRA2A_eCLIP_rep2_minus.bigWig
		ENCFF127SBH.bigWig	K562_TRA2A_eCLIP_rep1_plus.bigWig
		ENCFF349CWI.bigWig	K562_TRA2A_eCLIP_rep2_plus.bigWig
		ENCFF680ZUK.bigWig	K562_LSM11_eCLIP_rep2_minus.bigWig
		ENCFF058BLU.bigWig	K562_LSM11_eCLIP_rep1_minus.bigWig
		ENCFF329QOR.bigWig	K562_LSM11_eCLIP_rep1_plus.bigWig
		ENCFF583VFV.bigWig	K562_LSM11_eCLIP_rep2_plus.bigWig
		ENCFF751DNF.bigWig	K562_SRSF1_eCLIP_rep1_plus.bigWig
		ENCFF517SBV.bigWig	K562_SRSF1_eCLIP_rep2_plus.bigWig
		ENCFF222PLU.bigWig	K562_SRSF1_eCLIP_rep1_minus.bigWig
		ENCFF784WKS.bigWig	K562_SRSF1_eCLIP_rep2_minus.bigWig
		ENCFF848XEG.bigWig	K562_DDX43_eCLIP_rep1_minus.bigWig
		ENCFF251YSP.bigWig	K562_DDX43_eCLIP_rep1_plus.bigWig
		ENCFF768HEE.bigWig	K562_DDX43_eCLIP_rep2_minus.bigWig
		ENCFF245LIH.bigWig	K562_DDX43_eCLIP_rep2_plus.bigWig
		ENCFF232YAI.bigWig	K562_RNF187_eCLIP_rep2_plus.bigWig
		ENCFF118LDB.bigWig	K562_RNF187_eCLIP_rep1_plus.bigWig
		ENCFF575PGQ.bigWig	K562_RNF187_eCLIP_rep2_minus.bigWig
		ENCFF663VSZ.bigWig	K562_RNF187_eCLIP_rep1_minus.bigWig
		ENCFF093IND.bigWig	K562_TIA1_eCLIP_rep1_minus.bigWig
		ENCFF873ZAY.bigWig	K562_TIA1_eCLIP_rep2_minus.bigWig
		ENCFF782ZMF.bigWig	K562_TIA1_eCLIP_rep2_plus.bigWig
		ENCFF940BFP.bigWig	K562_TIA1_eCLIP_rep1_plus.bigWig
		ENCFF512THN.bigWig	K562_XRCC6_eCLIP_rep1_minus.bigWig
		ENCFF694JFS.bigWig	K562_XRCC6_eCLIP_rep2_minus.bigWig
		ENCFF456IVU.bigWig	K562_XRCC6_eCLIP_rep1_plus.bigWig
		ENCFF340LSX.bigWig	K562_XRCC6_eCLIP_rep2_plus.bigWig
		ENCFF791FVU.bigWig	K562_SLBP_eCLIP_rep2_minus.bigWig
		ENCFF121TWZ.bigWig	K562_SLBP_eCLIP_rep1_minus.bigWig
		ENCFF546UYO.bigWig	K562_SLBP_eCLIP_rep1_plus.bigWig
		ENCFF613ACW.bigWig	K562_SLBP_eCLIP_rep2_plus.bigWig
		ENCFF579HWA.bigWig	K562_SLTM_eCLIP_rep1_minus.bigWig
		ENCFF206WBW.bigWig	K562_SLTM_eCLIP_rep2_minus.bigWig
		ENCFF373IVQ.bigWig	K562_SLTM_eCLIP_rep1_plus.bigWig
		ENCFF665PCI.bigWig	K562_SLTM_eCLIP_rep2_plus.bigWig
		ENCFF890IGS.bigWig	K562_DDX42_eCLIP_rep1_minus.bigWig
		ENCFF193HOO.bigWig	K562_DDX42_eCLIP_rep2_minus.bigWig
		ENCFF755FOC.bigWig	K562_DDX42_eCLIP_rep1_plus.bigWig
		ENCFF008GNX.bigWig	K562_DDX42_eCLIP_rep2_plus.bigWig
		ENCFF869HBJ.bigWig	K562_SND1_eCLIP_rep1_minus.bigWig
		ENCFF664JCH.bigWig	K562_SND1_eCLIP_rep2_minus.bigWig
		ENCFF029JEG.bigWig	K562_SND1_eCLIP_rep1_plus.bigWig
		ENCFF615YQJ.bigWig	K562_SND1_eCLIP_rep2_plus.bigWig
		ENCFF120PTS.bigWig	K562_SRSF7_eCLIP_rep1_minus.bigWig
		ENCFF249SJD.bigWig	K562_SRSF7_eCLIP_rep2_minus.bigWig
		ENCFF493RTH.bigWig	K562_SRSF7_eCLIP_rep1_plus.bigWig
		ENCFF974CLY.bigWig	K562_SRSF7_eCLIP_rep2_plus.bigWig
		ENCFF814ZTD.bigWig	K562_ILF3_eCLIP_rep1_minus.bigWig
		ENCFF062BOK.bigWig	K562_ILF3_eCLIP_rep2_minus.bigWig
		ENCFF831OQK.bigWig	K562_ILF3_eCLIP_rep1_plus.bigWig
		ENCFF635JLZ.bigWig	K562_ILF3_eCLIP_rep2_plus.bigWig
		ENCFF158LBM.bigWig	K562_RBFOX2_eCLIP_rep1_minus.bigWig
		ENCFF617JKI.bigWig	K562_RBFOX2_eCLIP_rep2_minus.bigWig
		ENCFF541AUT.bigWig	K562_RBFOX2_eCLIP_rep1_plus.bigWig
		ENCFF087GDX.bigWig	K562_RBFOX2_eCLIP_rep2_plus.bigWig
		ENCFF388LRZ.bigWig	K562_AARS_eCLIP_rep2_minus.bigWig
		ENCFF500QFI.bigWig	K562_AARS_eCLIP_rep1_minus.bigWig
		ENCFF604TLE.bigWig	K562_AARS_eCLIP_rep2_plus.bigWig
		ENCFF386NTN.bigWig	K562_AARS_eCLIP_rep1_plus.bigWig
		ENCFF639RAN.bigWig	K562_TAF15_eCLIP_rep2_minus.bigWig
		ENCFF225ZZO.bigWig	K562_TAF15_eCLIP_rep1_minus.bigWig
		ENCFF576QRC.bigWig	K562_TAF15_eCLIP_rep1_plus.bigWig
		ENCFF778THT.bigWig	K562_TAF15_eCLIP_rep2_plus.bigWig
		ENCFF925UUJ.bigWig	K562_RYBP_eCLIP_rep1_minus.bigWig
		ENCFF898AFN.bigWig	K562_RYBP_eCLIP_rep1_plus.bigWig
		ENCFF613ILE.bigWig	K562_RYBP_eCLIP_rep2_minus.bigWig
		ENCFF747XIS.bigWig	K562_RYBP_eCLIP_rep2_plus.bigWig
		ENCFF839HQJ.bigWig	K562_ADAT1_eCLIP_rep1_minus.bigWig
		ENCFF574XKZ.bigWig	K562_ADAT1_eCLIP_rep1_plus.bigWig
		ENCFF379JWA.bigWig	K562_ADAT1_eCLIP_rep2_minus.bigWig
		ENCFF398MQC.bigWig	K562_ADAT1_eCLIP_rep2_plus.bigWig
List of DNase-seq and ChIP-seq of 10 histone modification of GM12878, HeLa-S3, and K562
sample	cell line	target
ENCFF428XFI	GM12878	DNase
ENCFF469WVA	GM12878	H3K27ac
ENCFF919DOR	GM12878	H3K27me3
ENCFF312MUY	GM12878	H3K36me3
ENCFF358MLO	GM12878	H3K4me1
ENCFF871LCJ	GM12878	H3K4me2
ENCFF003DXG	GM12878	H3K4me3
ENCFF931USZ	GM12878	H3K79me2
ENCFF599TRR	GM12878	H3K9ac
ENCFF392LMQ	GM12878	H3K9me3
ENCFF479XIQ	GM12878	H4K20me1
ENCFF050BDU	HeLa S3	DNase
ENCFF658XKZ	HeLa S3	H3K27ac
ENCFF186NYC	HeLa S3	H3K27me3
ENCFF157RUQ	HeLa S3	H3K36me3
ENCFF860GGZ	HeLa S3	H3K4me1
ENCFF648MSR	HeLa S3	H3K4me2
ENCFF460QIU	HeLa S3	H3K4me3
ENCFF523XAV	HeLa S3	H3K79me2
ENCFF601MHG	HeLa S3	H3K9ac
ENCFF658AOG	HeLa S3	H3K9me3
ENCFF116YMZ	HeLa S3	H4K20me1
ENCFF515UNC	K562	DNase
ENCFF779QTH	K562	H3K27ac
ENCFF928NWQ	K562	H3K27me3
ENCFF954JHK	K562	H3K36me3
ENCFF491AUC	K562	H3K4me1
ENCFF847JMY	K562	H3K4me2
ENCFF901YVS	K562	H3K4me3
ENCFF115LJM	K562	H3K79me2
ENCFF812HRW	K562	H3K9ac
ENCFF605FAF	K562	H3K9me3
ENCSR000AKY	K562	H3K9me3
List of 141 splicing factors curated by Papasaikas et al.
gene_name
SRSF4
SRSF11
SRSF6
SRSF5
SRSF1
SRSF7
SRSF2
SRSF9
SRSF10
SRSF3
SRRM2
DDX46
CRNKL1
CDC5L
SF1
PLRG1
PRPF19
U2AF2
U2AF1
SMNDC1
SNRPA
SNRPC
SF3B1
SF3B2
SF3B3
SF3A1
SF3A2
SF3A3
SF3B4
SNRPA1
SNRPB2
PRPF8
DDX23
CD2BP2
PRPF3
PRPF4
PRPF31
PPIH
SART1
USP39
SNRPB
SNRPD1
SNRPD2
SNRPD3
SNRPE
SNRPF
SNRPG
LSM2
LSM3
LSM4
LSM6
LSM7
DHX38
DHX8
DHX15
SLU7
CDC40
PRPF18
SRRM1
PRP4K
IK
RBM17
BCAS2
HTATSF1
RBM22
DHX16
XAB2
TFIP11
HNRNPA0
HNRNPA1
HNRNPA2B1
HNRNPA3
HNRNPC
HNRNPD
PTBP1
HNRNPK
HNRNPL
HNRNPR
RALY
FUS
ILF3
ILF2
SYNCRIP
HNRNPF
HNRNPH1
HNRNPH3
HNRNPH2
HNRNPU
RBM10
RBM5
RBM25
CHERP
CCAR1
THRAP3
WBP4
MFAP1
SMU1
CTNNBL1
AQR
PQBP1
WBP11
DDX41
DHX35
NOSIP
LENG1
FRG1
CDK10
FAM32A
PPIL3
PPIE
PPIL1
PPIL2
PPIG
SNW1
PUF60
PRPF40A
SNRNP70
SF3B6
SNRNP200
EFTUD2
PRPF6
SNRNP40
TXNL4A
SNU13
SNRNP27
CWC22
CACTIN
BUD31
ISY1
U2SURP
STEEP1
SYF2
SDE2
C9orf78
WDR83
ZNF830
CCDC12
FAM50A
FAM50B
PPWD1
CWC27
List of SRSF1 iCLIP-seq data in HEK293 cells
accession	cell line	target
SRR3734557	HEK293	SRSF1
SRR3734558	HEK293	SRSF1
SRR3734559	HEK293	SRSF1
