# Supplementary material for: Systematic identification and characterization of exon–intron circRNAs
Source: Genome Res. 2024 Mar;34(3):376–93. doi: 10.1101/gr.278590.123 (PMC11067877; doi:10.1101/gr.278590.123)
Supplement: Supplement 11 [file Supplemental_Table_S11.xlsx]

## Sheet: Table S11. Oligonucleotide
Supplemental Table S11: Oligonucleotide sequences used in this study
Primers used for RT-PCR
target	Forward Primer (5'-3')	Reverse Primer (5'-3')
circGFP-full length	CTTCTTCAAGTCCGCCATGC	GCCTTATTCCAAGCGGCTTC
EIciGFP_P_In	CTTCTTCAAGTCCGCCATGC	ACACATTTCAGGGACAAGTACA
EIciGFP_E_In	CTTCTTCAAGTCCGCCATGC	AAACAAAAATGGAGGCGCCC
18S	CGGCGACGACCCATTCGAAC	GAATCGAACCCTGATTCCCCGTC
NeoR	ATCTCCTGTCATCTCACCTTGC	ATGCCTGCTTGCCGAATATC
CRISPR-amplify	AATGGACTATCATATGCTTACCGTAACTTGAAAGTATTTCG	TCCCACTCCTTTCAAGACCTAGCTAGC
EIciABCC1	CTCCTCCTGTCATTGACTCTCATTG	GCTGAGCATGTTCATTCGTTCATTC
EIciCAPN15	TCAGAGTTCGGCATGCTCTGCG	AAACAGTTCTGCAGCGCAAGCA
EIciHERC2	CAGCGGAAGTCATAGGCTTGAA	ACCTGCTAACTCATGGAATGTC
EIciILKAP	CTGAGTCAGACAGTCATAGTTCCCT	TGAAACTGGTTTTGCTCTGGGTTGT
EIciJADE2	AGAAGCTTCCTATTCTTGGGCA	CAGGAGTGGAGAAACCTGACTT
EIciKLHDC4	CAATGTTACGGACCCTGACAGC	AGCTCATGAAGCTGGATTTGGG
EIciLETM1	CAGCACCCTTTGGGAATGTGGT	TGGTGAGGTCACAGGGACTCAG
EIciPUM1	TGTCCTTAAACTTGGGTTGCTG	ACATGAAGAGGGGAAGAAAACG
EIciSPEN	ACCAGTTGCAAAGACAAAGACAATG	CATCTGGGGCCCCTAAATATGAGTT
EIciTTL	TGGATGACTTGAGTAAAGCAGTGT	AACGCTTCCTCATATTCCATGTCC
GAPDH	CACCGTCAAGGCTGAGAACG	ACAGTCTTCTGGGTGGCAGT
Primers used for RT-qPCR
Target	Forward Primer (5'-3')	Reverse Primer (5'-3')
18S	CGGCGACGACCCATTCGAAC	GAATCGAACCCTGATTCCCCGTC
SRSF1	CGTGTTCTACAAATACGGCG	TACCCATCGTAATCATAGCC
DHX9	AGAGTGAAGAAGTTCCAGCTTTTG	CCTCCCATGGTTGTTGGTAA
DHX15	AGATGGATGTGATGTTGGGC	GCTTCACGAAGTAACATCCCA
HNRNPC	GCTCCATGAACTCCCGTGTA	AGTCCCGTTGAAAGTCATAGTCC
LSM6	TCGGACGACCAGTTGTGGTA	GCATCCCCATACTTATTCTT
SNRPA1	AGGCTGCAGGATGGTCAAG	CACCTAGATTTTCAATGACGGG
TGS1	TGGAGGAACCAATGAGGAAA	TGGCATGTGGTCTGTCTTTG
PABPC1	AAAAATGAATGGAATGCTCCTAAA	CTCCAAGTTCAGCTTCTCGTTC
FKBP8	AGCACCAGCCAGACAACATC	GGGGATGGCCTCACTGTACT
PAIP2	ATGGACCAAATCCAAGACCA	CGTACTTCACCCCAGGAACA
EIF3J	TTTTTGGAAGTCTTAGTTCGAGATG	TTTCACTGCAAAGCACAGTCA
RARA	CGAGCAGGACACCATGAC	GCGAAGGCAAAGACCAGG
LIMK1	ATGAACTTGAGCACGTTGGG	ATGAACTTGAGCACGTTGGG
GAPDH	CTTCATTGACCTCAACTACATGG	CTCGCTCCTGGAAGATGGTGAT
EIciEIF3J	CGGCAACAGAAGAAAAGGCA	AGCACTCATACAGAAATACAGCA
EIciLIMK1	AGGATCTGTGGGGGTTGTTG	TCTCATAGTACTGGTGCGACAG
EIciCAMSAP1	TATAGCTGCTGCCTCTGCCC	TCTGAGGTCCTCAGGGATGT
EIciCEP72	GAGCCTGACTACCGCCTTTT	CGCAACACAAAGTGTACCGT
EIciPDCD11	CTGCTGACAGGTCCAGAGTC	ATGATCGCAGCGACAAAGTC
EIciFKBP8	TGTCTGGTGGCATGGTGAC	CCGTGAGCATCTCCAGGTC
EIciPIP5K1C	TCAAGACCTATGCACCTGTCGC	AGGTGCTGCTTTCAGCAGAGAA
EIciPRPSAP1	CCGCGGAGATCCTGAAAGAG	GGGAGTTTGGGTGAGAAAGGA
EIciCLK1	TGGTAGTGCAACATATGATGACG	AGAAGGCATAAGCTATTAAGGCA
EIciPPME1	AGTCCTGCTCCTTCTGCATG	TGGCATGGACTTCCAGGCAA
EIciREXO4	TCAGTGGGATTCGGCCTGAGA	TGGGAGGTGCTTGCCTCATT
EIciHDAC1	AAGAGGCCTTCTACACCACGGA	ACCTGGCCTAAGGTGCTCTT
EIciFBF1	GTGCTCTTGCCTCTGGTTAC	TCAGCTCCTTCACAGCACTG
EIciXPO1	AGAGTTGCCAGTCCTATAAGCA	ATTGTGTCGACTCTTGTCCAAG
EIciAFG3L1P	CTGAGAAACATCAACAGCACCA	GGTCACTCACTGTAGAAGTCAC
EIciPDE8A	CAGCCTTGAGTGCATTGGTG	GCATGGGACTACTTTCCTGGG
EIciMAP4K3	ACAGTAAAGGAAAAATGCAC	TGCACAGTAAGTAAAGCCTTAGT
EIciUBA2	GCCAGAGCTAGAGCATCTAATG	CACACATTACCTAGCACATATAGC
EIciFANCA	ACTCACGTCATGTTCCTGCT	CACAAAGAGCCTGCGGTACA
EIciPAIP2	TCTCCCACAAACTATGGACCA	ACAATCATATTGAGGGCCAGAA
EIciANKLE2	AACAGGAGAACGGGAAGCCT	AACCAACTGTGTGCCCCACG
EIciRAB3IP	CTGCCAGTATAGCATCTAGTAC	CATGGAAAGATATCTTCCTGGT
LIMK1-region A	CCCATCCCAGACTGACATTTC	TTTTTCCCAGCCAAGCATCC
LIMK1-region B	CTGGCATTCCTCCCCATCTG	AGGTGTGCAGGGTCATCAAAG
LIMK1-region C	ACTGGGTTTTGCCATGTTGG	GTGGCTCACACCTGTAATCC
LIMK1-region D	TTGCAGTGAGCCGAGATCG	TCGGCTACAGGCACCTTTG
LIMK1-region E	CCCTCTCCTGCAGGTGTTG	TCCCTTGGTGATTTGCTCAGAG
LIMK1-region F	GGTATCCAAGCAGACCCCAT	TAGATGGGGGCGCTGAGGGA
LIMK1-region G	GCTTTCTGAGCCTGACTGTC	CACAGATCCTCCCCTAGGC
LIMK1-region H	AAGTACCACCCCGAGTGTTTC	AAGGCACTCACCAGTACAGC
LIMK1-region I	GTGCTGACTCTCCCACACC	CGTCTGAGGCTTTTTCACACTG
LIMK1-region J	TTGAGGCTAGGAGTTCAAGACC	CAAGAGAGTCTCCTGCCTCAG
LIMK1-region K	TGGGAGGTGGAAGTTGCAG	CATGGCCAGTAAGAAAGCTGAC
LIMK1-region L	GGCACAAACCACCAGAGGT	GGAGGGAGGGGAGATGCTTC
Antisense oligonucleotides (ASO) sequence used for knockdown
target	sequence
EIciLIMK1	GTCACAACACCAGTACAGCT
scramble	GCGUATTATAGCCGAUUAAC
siRNAs used for knockdown
target	sense	antisense
LIMK1	GGGUGCUCUACAAGGACAA	UUGUCCUUGUAGAGCACCC
Ctrl	UUCUCCGAACGUGUCACGUTT	ACGUGACACGUUCGGAGAATT
shRNAs used for knockdown
shRNA	Forward Primer (5'-3')	Reverse Primer (5'-3')
shSRSF1-1	CCGGGAAGCAGGTGATGTATGTTATCTCGAGATAACATACATCACCTGCTTCTTTTTG	AATTCAAAAAGAAGCAGGTGATGTATGTTATCTCGAGATAACATACATCACCTGCTTC
shSRSF1-2	CCGGGCAGATCTCGCTCTCGTACATCTCGAGATGTACGAGAGCGAGATCTGCTTTTTG	AATTCAAAAAGCAGATCTCGCTCTCGTACATCTCGAGATGTACGAGAGCGAGATCTGC
shEIciLIMK1	CCGGTACTGGTGTTGTGACTGCAGCTCGAGCTGCAGTCACAACACCAGTATTTTTG	AATTCAAAAATACTGGTGTTGTGACTGCAGCTCGAGCTGCAGTCACAACACCAGTA
